# Supplementary material for: Dynamic metabolic and molecular changes during seasonal shrinking in Sorex araneus
Source: HighWire-hosted journal article supplement (doi:10.1101/gr.280639.125), 2025-11-04
Supplement: Supplemental_Data.zip [file Supplemental_Data_S1.xlsx]

## Sheet: Sheet1
Individual	Season	Sexual Maturity	Stage	Capture Date	Sex	Body Mass (g)	Brain Mass (g)	Liver Mass (g)	Spleen Mass (g)	Heart Mass (g)	Sequencing ID	RIN	Reads Pre-Filtration	Reads Post-Filtration	Filtered Reads	Mapping Percent
Indiv1	Summer	Juvenile	1	2020-07-01	M	7.24	0.299	0.681	0.106	0.268	HFS166	8.7	37697348	37236638	460710	83.1
Indiv2	Summer	Juvenile	1	2020-07-01	U	8.23	0.259	0.815	0.105	0.129	HFS167	8.2	39225540	38782424	443116	82
Indiv3	Summer	Juvenile	1	2020-07-01	F	7.71	0.265	0.672	0.105	0.104	HFS168	7.6	38711020	38301446	409574	78.3
Indiv4	Summer	Juvenile	1	2020-07-01	F	7.8	0.315	0.615	0.088	0.151	HFS169	7.8	35584248	35191538	392710	77.1
Indiv5	Summer	Juvenile	1	2020-07-01	F	8.41	0.262	0.721	0.102	0.137	HFS170	8.3	36307680	35891128	416552	82.2
Indiv6	Fall	Juvenile	2	2020-11-01	F	7.2	0.2433	NA	0.0724	0.1113	HFS207	8.6	38315696	37974456	341240	79.8
Indiv7	Fall	Juvenile	2	2020-11-01	F	7.32	0.2305	0.6048	NA	0.119	HFS208	8.9	39177754	38856380	321374	81.1
Indiv8	Fall	Juvenile	2	2020-11-01	M	7.6	0.2316	0.6641	0.0585	0.1789	HFS209	7.5	40876026	40467772	408254	77.3
Indiv9	Fall	Juvenile	2	2020-11-01	M	8.3	NA	0.5512	0.0564	0.1134	HFS210	8.9	34312308	33987182	325126	81.5
Indiv10	Winter	Juvenile	3	2021-02-01	F	6.55	0.213	0.8377	0.0502	0.132	HFS223	8.8	35672000	35224762	447238	80.6
Indiv11	Winter	Juvenile	3	2021-02-01	M	6.72	0.2002	0.714	0.0426	0.3	HFS224	8.9	32789192	32423180	366012	81
Indiv12	Winter	Juvenile	3	2021-02-01	M	6.5	0.2482	0.5638	0.0544	NA	HFS225	8.8	31957692	31627122	330570	79.9
Indiv13	Winter	Juvenile	3	2021-02-01	M	7.41	0.241	0.5931	0.0516	0.1407	HFS226	8.7	30393756	30077124	316632	80.7
Indiv14	Winter	Juvenile	3	2021-02-01	M	7.22	NA	0.6768	0.0417	0.1154	HFS227	8.8	32612972	32257554	355418	80.9
Indiv15	Spring	Adult	4	2021-04-01	M	10.5	0.3786	1.1665	0.1079	0.1715	HFS268	8.8	43516094	43045654	470440	76.7
Indiv16	Spring	Adult	4	2021-04-01	M	11.01	0.2731	1.3526	0.1296	0.176	HFS269	8.1	39509678	38998186	511492	78.3
Indiv17	Spring	Adult	4	2021-04-01	M	10.3	0.2727	1.0078	0.1238	0.1899	HFS270	8.5	39793212	39534150	259062	80.2
Indiv18	Spring	Adult	4	2021-04-01	M	11.4	0.2627	1.1836	0.116	0.1649	HFS271	8.6	44568664	44127030	441634	77.1
Indiv19	Spring	Adult	4	2021-04-01	M	9.81	NA	1.3582	0.0817	0.1614	HFS272	8.4	45492134	45004052	488082	76.3
Indiv20	Summer	Adult	5	2021-06-01	M	11.64	0.271	0.9398	0.1404	0.1519	HFS318	8.7	51301438	50799638	501800	81.3
Indiv21	Summer	Adult	5	2021-06-01	M	12.56	0.2347	0.8815	0.1559	0.1897	HFS319	8.2	44200758	43655574	545184	80
Indiv22	Summer	Adult	5	2021-06-01	M	12.4	0.2614	1.169	0.1409	0.2358	HFS320	8.2	39190484	38747260	443224	80.6
Indiv23	Summer	Adult	5	2021-06-01	M	11.5	0.2527	0.9215	0.0698	0.2527	HFS321	7.9	38236052	37797838	438214	75.4
Indiv24	Summer	Adult	5	2021-06-01	M	12.44	0.2488	1.2328	0.1697	0.2488	HFS322	8	38278252	37789078	489174	81.2
