# Supplementary material for: Dynamic metabolic and molecular changes during seasonal shrinking in Sorex araneus
Source: HighWire-hosted journal article supplement (doi:10.1101/gr.280639.125), 2025-11-04
Supplement: Supplemental_Data.zip [file Supplemental_Data_S2.xlsx]

## Sheet: 250 Passed QC (normalized)
	SUMJUV20_1	SUMJUV20_2	SUMJUV20_3	SUMJUV20_4	SUMJUV20_5	FALLJUV20_1	FALLJUV20_2	FALLJUV20_3	FALLJUV20_4	WINTERJUV21_1	WINTERJUV21_2	WINTERJUV21_3	WINTERJUV21_4	WINTERJUV21_5	SPRINGAD21_1	SPRINGAD21_2	SPRINGAD21_3	SPRINGAD21_4	SPRINGAD21_5	SUMAD21_1	SUMAD21_2	SUMAD21_3	SUMAD21_4	SUMAD21_5
1-Methyl Adenosine	1.12029	0.506048	0.643059	0.251032	1.34051	0.419955	-1.25508	2.40033	-0.872557	-1.64779	-0.919247	-1.74918	0.0173076	0.00460534	0.312998	0.105409	0.935142	-0.314547	-0.238915	0.952636	-0.749421	-0.657039	0.437795	-1.04333
3-Hydroxy-2-methyl-4-pyrone	1.7726	1.02087	0.0189545	0.220755	1.54747	-0.616299	0.293603	1.02711	0.234927	-1.00418	-0.500638	-0.296197	-0.464633	0.964074	-0.439174	-0.548012	0.575319	-2.15099	-0.614608	0.786002	-0.981341	-0.53889	1.35607	-1.6628
3-Methylhistidine	-0.598806	0.350641	-0.977833	-0.992351	-2.07346	-0.074458	-0.77514	1.22624	-2.33705	0.295452	0.453684	0.87738	0.0660389	-0.822571	0.527733	1.42263	0.778385	-0.204924	0.24633	-0.0751919	1.70454	0.891619	0.393	-0.30188
4-Hydroxyproline	-0.74416	0.0533527	-0.0582596	-0.722314	-0.617322	0.512793	-0.455817	0.349101	-1.05608	0.320417	-0.828387	3.60418	-0.0605424	-0.531124	-0.496301	0.488706	-0.445462	0.0467933	1.76327	-0.199572	0.848079	-0.271052	-0.673936	-0.826362
7-Methylguanine	1.03538	1.13537	-0.152851	0.945844	1.01815	-0.266948	-1.51674	1.83874	-1.32803	-1.30472	1.04596	-1.11907	-0.268706	-1.04239	0.850765	0.0851474	1.32227	0.318815	0.718772	-0.236798	-0.849569	-1.15515	-0.24252	-0.831734
Adipic acid	1.18365	0.77826	1.44935	1.75903	-0.187969	1.73049	-0.500887	0.651241	1.9105	-0.355391	-1.3166	-0.479116	-1.04195	-0.785997	-0.782649	-0.579089	-0.0321201	0.0215387	-1.55702	-0.454328	-0.600507	-0.790374	-0.216402	0.196327
Allantoin	2.59215	-0.0313237	-0.192905	0.671813	-0.247381	-0.66948	-0.562884	1.6822	0.171291	0.355072	0.273055	0.599199	-0.847243	-2.47687	0.015265	0.220808	-0.246054	0.248048	0.596586	0.286073	0.194552	-0.716959	-1.87922	-0.035793
Allopurinol	-0.973209	-0.169985	-1.00763	-2.09068	-2.30467	0.111846	0.456332	0.868308	-0.0352828	-0.38496	0.867014	1.20373	0.178876	-0.796514	0.691244	0.881524	0.947876	-0.364053	1.03162	1.56208	0.702542	-0.964967	-0.0722654	-0.338778
Arginine	0.0898705	-2.29147	0.837634	0.846801	0.838125	-0.752667	0.400634	-0.636257	1.07372	1.0297	0.684684	0.900731	0.332369	0.617488	0.181265	-0.53074	-1.84799	0.967244	-0.349014	0.511378	-0.781316	-2.07911	-0.531671	0.488598
Carnitine	-2.66209	-1.44987	-0.32569	-0.80328	-0.686402	-0.475837	0.257223	-0.035592	0.376792	1.38611	-0.645018	-0.21468	-0.681016	-0.859981	1.39323	1.88728	0.860281	0.623202	1.00234	0.562882	0.489307	-0.480012	0.358219	0.122598
Citric acid	0.934119	1.15812	-1.08503	-0.0810806	-0.920409	1.34954	1.56107	0.689691	1.39994	-1.07036	-0.045716	-0.560604	0.0715967	1.40491	0.344279	-0.739976	1.08792	-1.41952	-0.463923	-1.16262	-1.11537	0.395188	-0.485615	-1.24614
Citrulline	2.25822	-1.49386	-0.231279	0.482291	-0.108269	-0.456494	0.17113	-1.53215	0.977009	2.25751	0.141172	1.30428	-0.435163	-0.203566	0.151277	-0.137363	-0.975187	0.216151	-0.79225	0.0542875	-0.282829	0.436613	-1.68167	-0.119861
Cortisone	0.29079	0.849516	2.23752	1.5736	1.07524	-0.6358	0.119696	0.508544	-1.7946	-0.471737	-0.045895	0.124262	0.386667	0.622968	0.373934	0.0332222	0.189815	-1.60573	-0.364875	-0.59008	-0.0170534	0.440117	-1.60913	-1.69101
Cotinine	-1.88786	-0.476183	0.13681	-0.155647	-0.115731	-0.40866	0.277462	0.892736	-0.333775	-3.56527	0.299386	0.346091	0.670677	1.11464	-0.236762	-0.198373	-0.24686	0.76485	0.113015	0.72611	0.0905023	0.160122	0.958946	1.07377
Dodecanedioic acid	0.190291	1.7305	-0.925356	0.225487	-1.3562	1.8926	0.2186	-0.107877	0.196112	1.15272	-1.70883	0.656584	-1.44579	-0.739344	0.370725	-0.339678	0.449901	-1.14229	-1.74673	0.738575	0.158344	0.71019	0.446686	0.374768
Galactonic acid	1.63132	1.86943	1.1206	1.46178	-0.418869	0.119817	0.297589	0.942295	1.19123	-0.856793	-0.700094	-0.553429	0.385825	-0.345021	-0.793341	-1.38803	0.438084	-1.18431	0.57942	-1.52375	-0.85896	-1.07114	0.225312	-0.568962
Glutamic acid	-0.598529	-0.0502877	-1.17807	-0.239197	0.261896	0.349695	1.25537	-0.651059	0.431669	2.16773	-0.57294	-0.99734	-0.561984	-0.406208	2.26238	0.415335	1.09801	0.773126	-0.0229692	-1.07958	0.635103	-1.18859	-1.16461	-0.938954
Glutathione disulfide	0.978267	1.35809	1.04568	1.09177	1.31171	0.893309	0.488453	0.489407	0.918308	1.27974	-1.19644	-0.415528	-1.36462	-0.826771	0.34156	-0.371677	-0.181762	-0.321495	-0.500124	-0.167022	-0.99473	-0.24035	-1.93485	-1.68092
Hexadecanedioic acid	1.20332	2.49481	0.539722	0.273214	-0.43443	1.39475	-0.451759	0.429945	-0.415334	0.386738	-1.86757	-0.594589	-1.21246	0.248939	-0.295936	-1.21723	0.565425	-1.20161	-1.27157	0.385438	-0.323991	1.20416	0.276937	-0.116931
Hexanoyl Glycine	-0.537119	-0.834976	-1.70126	-0.496201	-1.18948	0.547806	1.15115	0.862526	2.37486	0.824149	-0.528797	-0.11017	0.477677	0.410931	1.44465	-0.268444	-0.567262	0.272742	-0.0471306	-1.11822	0.235644	0.313668	-1.97692	0.460185
Histidine	-1.83559	-0.424224	0.417542	0.211847	0.0829441	-0.0334089	0.796125	-2.41908	1.2106	-0.0493066	0.322759	0.14251	0.844329	0.639058	-0.478675	1.53634	-1.13187	1.12066	1.14483	-1.41892	-1.08343	0.00932639	-0.20298	0.59861
Hypoxanthine	0.609144	0.966207	0.531842	-0.741375	0.651195	0.148666	0.164132	-1.41619	0.319498	2.00231	0.0187297	-0.489896	-0.0509262	0.147471	1.18263	0.387213	0.722315	-0.505944	-0.319309	-2.07565	0.960464	-2.18683	0.208564	-1.23425
Inosine	-1.00867	-0.182574	-0.721599	-2.34548	-2.32445	0.2884	0.363273	0.891632	-0.16363	-0.144307	1.02198	1.09801	0.214962	-1.0683	0.72062	0.921042	0.911176	-0.524423	0.678379	1.49701	0.659679	-0.634134	-0.0173139	-0.131287
Isoleucine	-0.153876	-2.18551	0.249821	-0.692387	-2.0734	0.112862	1.23832	0.486236	2.1468	-0.0787694	0.0391852	1.30124	-0.520157	0.0979442	-0.432305	-0.0157312	0.106125	0.655646	0.189555	0.487274	1.09877	-0.716029	-1.52667	0.185057
Lactic acid	-0.887234	0.62026	-0.484656	0.652662	0.178832	0.0424845	1.28974	-1.91747	-0.00777732	1.57101	0.0657119	0.0943185	0.892364	-0.820131	0.815762	0.235407	0.0801781	-0.456866	0.754244	-2.81498	-0.630175	-0.075714	1.32012	-0.518081
Leucine	-0.237879	-2.15411	0.248382	-0.581923	-1.86113	0.295824	1.17921	0.358327	2.39852	0.0120727	0.138024	1.56818	-0.734296	0.114257	-0.530246	0.0339141	-0.126474	0.500186	-0.0870486	0.434711	0.997954	-0.673427	-1.36019	0.0671559
Linoleic acid	1.12325	0.894674	0.818528	0.976574	0.639991	-1.454	-0.0799508	-0.854057	1.35735	-2.68663	-0.0729798	-0.25201	0.262613	1.32457	0.465865	-0.910322	0.951496	-0.2855	-0.103186	-0.652912	-0.785009	0.85345	-0.526487	-1.00531
Methionine	-1.64459	-1.43639	0.0962411	0.724611	-0.13623	0.0595819	0.777202	0.284211	1.5483	1.83802	0.356591	1.41746	0.436291	0.0423593	0.559838	-0.83202	-0.678481	-0.540427	-0.2555	-0.198375	1.29133	-0.845827	-1.9514	-0.912795
Myristoylcarnitine	0.573176	2.13881	1.14505	0.772594	0.50476	0.118847	-0.501268	0.89906	0.634499	-1.9309	-0.95011	-0.522021	-1.31924	-0.824923	0.170876	0.0650621	-0.0947538	-0.0829488	-0.793532	-0.302014	-0.921563	1.80365	0.730885	-1.314
N8-Acetylspermidine	1.36783	0.80474	0.601959	0.785482	0.487685	0.302408	0.242326	1.23772	0.886525	-2.18425	-0.721712	-1.10995	0.794241	0.865613	-2.50782	-0.367721	-0.0850499	-0.855475	-0.815876	-0.136892	0.82071	-0.491366	0.290755	-0.211878
N-Acetyl-glycine	-0.111043	0.280171	-1.36129	1.33822	-0.718504	-0.836602	-0.892322	2.32287	-0.255727	0.0679009	-0.37415	-0.946715	-0.830595	0.412355	-0.150792	-0.248437	2.62457	-0.0476865	-1.2248	0.814296	-0.221856	0.446086	0.457356	-0.543311
N-Acetyl-ornithine	0.0878299	0.0785849	-0.727051	-0.662137	-0.418877	-0.472687	-0.812008	-0.638868	-1.45444	0.0935189	-0.789547	0.861887	-1.17354	-1.52163	-0.0996272	-0.537973	0.130692	0.0383537	0.858536	0.165327	1.56124	1.72499	1.82281	1.88461
Nicotine amide	1.45835	1.66106	0.632486	-0.82252	1.37408	0.102714	-0.36418	0.514332	1.30887	-0.760855	-0.401651	-2.20284	-0.895578	0.851148	-0.481015	0.806835	-1.00551	0.0755023	-1.44144	0.563775	-0.554896	-0.757401	0.750599	-0.41185
Nicotinic acid	1.2083	-1.59396	0.746648	0.825559	-0.554181	-0.154327	0.595026	-1.42386	0.162113	0.154493	0.161591	1.59283	-0.36352	-1.68859	-0.232132	-0.260225	-0.97723	0.5443	0.77996	-0.786153	2.13491	-0.353399	-1.26776	0.749609
Pantothenic acid	-0.350749	-0.710116	0.560278	-0.339689	1.76563	1.28107	1.11518	-0.0120925	1.3712	0.00771806	0.257729	-2.35633	0.687508	-0.379958	0.561226	-1.32505	0.644165	-0.111046	0.0836935	-0.674507	-0.979231	-1.89125	0.314676	0.479939
Phenylalanine	-1.00864	-2.43532	0.325904	-0.655235	-1.62386	-0.584646	0.408103	-0.0338974	1.30154	-0.420718	-0.133756	0.795731	-0.725498	-0.0900365	0.324202	0.307464	0.215203	1.14443	0.794918	-0.0135042	2.15482	-0.127118	-1.06977	1.14969
Pipecolinic acid	-1.9771	-0.183351	-1.13004	-0.298383	-1.08928	-0.310048	0.00442449	-0.979174	-0.620617	-0.34158	1.44056	0.703095	0.515303	1.14076	0.138809	0.8038	-1.106	1.89152	-0.191899	1.31918	-1.5186	0.705869	0.243339	0.839403
Pyroglutamic acid	-0.481302	-0.659717	-0.410439	-0.119022	0.365381	-0.774009	1.84721	-0.31405	1.02585	-1.09606	0.555431	-0.704235	0.0837938	1.0266	-0.779294	0.539661	0.864314	-1.17722	1.1575	-1.06545	0.572012	1.10778	-2.44113	0.876407
Sebacic acid	0.933385	2.07976	-0.841671	0.284761	-0.98305	1.87151	-0.890343	0.720965	-1.69377	1.06708	-1.1462	-0.312527	-1.40315	0.276393	0.00397752	-0.444334	0.200059	-0.456229	-0.871345	0.98751	-0.66166	0.161422	1.05876	0.0586953
Succinic acid	0.752933	0.729763	-0.479481	-0.040473	-2.50167	0.341036	1.09885	-0.30173	1.03235	0.249914	0.0644368	-0.703983	0.948802	-1.09438	-0.322761	-0.142833	0.913348	-0.0851904	0.697082	-1.49644	-2.04619	0.618738	1.35631	0.411563
Tetradecanedioic acid	0.696888	2.36858	0.33582	0.501686	-0.371466	1.49398	-0.137892	0.696175	-0.193845	0.540041	-2.10316	-0.264223	-1.28891	-0.0917577	0.0236944	-1.20577	0.0953538	-1.40747	-1.3873	0.336108	0.0833183	1.27305	-0.175781	0.182872
Thiamine	0.177516	1.6453	-0.726773	-0.111487	-0.0831882	1.01524	-0.465559	0.38283	0.182392	0.349388	1.0706	-0.208026	-0.096282	0.773135	1.59618	-0.0490278	0.507836	0.367152	-0.191983	-1.21276	-1.08671	-1.80524	0.630347	-2.6609
Threonine	-2.27934	-2.35465	0.0862168	0.0125119	-0.689482	-0.453283	0.391107	-0.187559	0.136307	1.33578	0.506834	1.19107	0.895858	-0.0864644	0.401328	0.129245	0.265093	0.73925	0.329896	-0.382194	1.239	0.19953	-2.02719	0.601136
Trimethylamine N-Oxide	0.340238	-0.541175	-1.22802	-0.488807	-0.875108	-0.35274	-1.0547	-0.678531	-1.46806	0.353906	0.0323824	0.428428	0.446047	-0.71475	0.1418	0.0982432	-0.94616	3.11016	1.25194	-0.336774	-0.194893	1.14822	0.315114	1.21326
Tryptophan	-2.01922	-2.03512	0.863639	0.250221	-0.776611	-1.22573	0.795757	-0.420675	1.73364	-0.135296	0.485305	-0.0105584	1.20551	0.0395175	0.405849	-0.0724055	-1.38344	0.482481	0.39821	1.03748	1.46728	-0.215523	-0.108931	-0.761393
Tyrosine	-0.836046	-2.19221	0.13889	0.317896	-0.923816	0.416831	1.2701	-0.281113	2.3575	1.22278	-0.315247	0.749189	-0.335392	-0.0347561	-0.672583	-0.947548	-0.580368	0.0851516	-0.0825524	-0.396424	1.8103	0.589471	-1.13848	-0.221578
Uric acid	0.575946	-1.28937	1.13039	0.120086	-1.45668	0.854458	1.00841	2.12208	-0.278789	-1.93482	-0.845578	-0.464202	0.419791	-0.859959	-1.21457	-0.145417	0.246094	-0.285213	0.498214	0.685533	0.730075	-1.17904	1.07593	0.486625
Uridine	1.25308	1.42114	0.0411504	-0.711967	-0.196731	-0.0636093	-0.0764633	1.98692	-1.68824	0.0305539	-0.546514	-0.0480855	0.393134	-0.977895	0.578188	-0.344244	0.888307	-1.58691	-0.278716	1.08596	-0.14226	-2.11199	0.0257883	1.06941
Urocanic acid	-0.680883	0.370439	-0.50189	1.01158	0.205532	-0.510547	-1.37741	-1.60257	0.151221	1.15857	0.378691	0.242863	-1.15062	-0.980139	-0.928253	0.805303	-0.199658	0.589413	0.000211814	-1.50693	1.4236	-0.403953	1.7272	1.77823
Valine	-0.574804	-2.56151	-0.155854	0.0504535	-1.30454	0.639923	1.08905	-0.173898	2.41496	0.48175	-0.0114673	1.30683	-0.382461	-0.0301173	-0.277135	-0.196209	-0.104776	0.523395	-0.155142	0.107899	0.814224	0.247236	-1.91004	0.162225
Xanthine	1.25159	0.807124	-0.345068	1.04226	0.0727514	-0.475113	-0.564137	2.13851	-1.96609	0.504408	0.655339	-1.32106	-0.690642	-1.88235	0.767761	-0.417997	0.334926	-0.803274	0.604788	0.823371	0.461691	-1.14118	-0.084399	0.226786
_-aminobutyric acid	-1.63703	-0.145295	-0.337522	-0.0556042	0.601869	-0.182666	0.640992	-1.82158	0.477093	1.44062	0.411723	-0.837812	-0.15381	0.920232	1.88589	-0.189091	1.36302	1.10503	0.358252	-1.31791	-0.261094	-0.82886	-1.63722	0.20076
12(S)-HETE	1.32396	2.85613	-0.146339	-1.30065	0.10295	0.0600461	0.658659	0.0793775	0.932157	-0.271081	-0.054235	-0.336129	-1.40699	-1.54278	0.576454	-0.301871	0.853737	-0.890304	-0.90097	0.574944	-0.27562	0.829813	-0.14392	-1.27734
2-Aminoadipic acid	0.799912	-0.104252	0.437813	-0.147418	-1.50002	0.0575089	-0.291568	0.23686	1.35858	0.603218	-1.47132	0.61488	-0.904801	-2.03109	0.614349	-0.508299	-1.11248	-0.0642632	2.06067	-0.291048	0.938185	0.408377	-1.02354	1.31974
2'-Deoxyuridine	1.24744	2.24312	0.593314	0.0945423	0.925488	0.408318	-0.608172	2.15437	-0.429343	-0.790147	-0.76847	0.77537	-0.612692	-1.71939	0.252009	-0.65561	-0.93878	-1.10568	-0.849488	0.739998	0.389428	-0.272442	-0.445366	-0.627822
2-Ethylhexyl sulfate	2.14424	0.410072	0.947349	-0.0182194	1.21169	-1.166	-1.07213	-0.193653	-1.53777	-0.570793	-1.00664	-1.12175	-0.496479	-0.593354	-0.754309	-0.591073	-0.550979	0.0168627	1.46098	-0.00685445	0.00514753	0.79832	1.62657	1.05877
2-Ethylhydracrylic/2-(hydroxymethyl)butanoi acid	1.8063	1.95943	-1.97896	-0.624716	-1.2046	-0.16882	0.226536	1.35368	-0.15452	0.191515	-0.529751	0.811333	0.0305704	0.0783049	-0.23344	-0.496769	0.81269	-1.85039	-0.663553	0.438584	-0.680846	-0.24249	1.28581	-0.165891
2-Hydroxybutyric acid	1.38299	-0.0365064	-1.79723	-0.49216	-0.852395	0.320554	0.356009	1.72514	0.48022	-0.613284	-1.00235	1.06071	-0.501542	2.10391	-1.0409	-0.255017	-0.0140499	-1.21814	-1.21965	1.21462	0.160728	0.0792226	0.639387	-0.48026
2-Hydroxyisocaproic acid	-0.315878	-0.589758	-1.10604	-0.311425	-0.955055	-0.32969	-0.276786	-1.47995	0.769774	0.996205	0.684141	0.677417	-0.318495	-0.354002	1.83831	-0.595198	-0.219143	1.76945	1.43917	-0.80856	0.264594	0.421173	-2.11678	0.916521
2-Hydroxyoctanoic acid	0.138808	0.31782	-0.578517	-0.0158927	-1.3088	0.126596	-0.529912	-0.00719348	-0.86889	-3.61789	-0.0660594	0.285798	0.533966	0.447436	-0.6724	0.434796	0.593604	0.116217	0.436006	0.32865	0.275744	0.731027	1.42126	1.47781
2-Hydroxyphenylacetic acid	1.62458	-0.0591981	1.24314	-0.6995	0.0854269	1.92592	-1.48255	-0.762609	-0.693965	2.22606	-0.591907	-0.0282057	-0.248466	0.12996	-0.226523	0.577422	-0.450385	-0.696015	-0.691206	-1.22551	0.121159	-0.806124	1.35881	-0.63031
2-Oxoglutaric acid	-0.675658	-0.466621	-1.06149	0.817811	-1.31637	-1.70555	1.21431	-0.724928	1.35344	-1.02144	0.551934	0.131346	0.61727	1.28533	1.78091	-0.491284	1.25978	-0.073389	0.522686	-0.12529	0.42629	-1.12665	0.196584	-1.36902
3-Chloro-Tyrosine	-1.86085	-2.04445	-0.190097	0.712905	-0.16003	0.482407	0.321467	-1.66029	0.317503	0.637351	0.634941	1.14845	-0.0018977	-0.146356	0.189327	-0.15342	-0.820028	1.03477	0.510649	0.420694	0.556875	2.10841	-1.44993	-0.588397
3-Hydroxybutyric acid	1.10858	-0.69452	-1.09076	0.0276521	-2.09929	-0.168424	0.862492	1.37161	1.38471	1.29541	0.257555	1.46843	0.0241234	1.03067	-0.278581	-0.278924	1.02343	-1.09506	-0.389257	-0.910335	-0.395789	-0.810134	-1.37437	-0.269233
3-Methyl-2-oxovaleric acid	0.816384	1.0408	-0.321272	0.188198	0.0493736	2.53726	-0.616926	0.293471	-1.68635	2.14975	-0.995503	0.423262	-0.433083	0.0066506	-0.24468	-0.515485	-1.1268	-0.610602	-1.6905	0.609696	-0.275608	0.110601	-0.0179291	0.30928
3-Methyladipic/pimelic acid	2.33686	1.44627	0.0337155	0.120465	-0.605116	1.48381	-0.751376	1.62565	-1.13927	0.504108	-1.36742	0.0207057	-1.24696	-0.167454	-0.90723	-0.643438	0.0584575	-0.945335	-1.07334	0.716946	-0.113001	-0.353439	0.834208	0.132169
3-Methylglutaconic acid	0.0944108	0.356401	1.09408	1.02707	0.301549	-0.147748	-0.468874	-0.523295	-0.293621	-2.93195	0.480002	-0.432571	-0.659559	-1.11818	0.44894	0.787567	0.156985	0.374101	-0.432305	0.154063	-1.10969	-0.69643	1.62037	1.91868
3-Phenyllactic acid	-1.38045	-0.558006	-0.251615	1.25301	-2.11383	0.106433	-1.25866	-1.36202	-0.0837979	1.19021	0.656866	0.598122	-0.887413	-1.07213	0.978073	0.47751	0.384347	-0.0184766	1.26727	-1.02087	1.4385	0.62244	0.284602	0.749895
3-Ureidopropionic acid	-0.668078	0.00979765	-0.369486	-0.524468	0.319053	-0.963902	-0.637406	0.628098	-0.544691	-0.159257	-0.0117141	-0.055778	-0.53873	-2.49066	0.780557	-0.0712386	0.261989	-0.172815	1.98969	-0.91829	1.62596	-0.545688	1.95402	1.10303
4-Hydroxybenzaldehyde	-0.0697233	1.18422	-0.966951	-1.15645	-1.21938	-0.248379	0.302804	0.16641	-0.909094	-0.0681213	-0.657301	-0.957378	-0.537636	-1.18756	0.805712	0.465276	0.658972	-0.300881	0.287584	-1.35754	1.75333	2.49711	0.758253	0.756726
4-Methyl-2-oxovaleric acid	0.411225	-0.355971	-0.043911	1.62645	-0.778039	-1.43541	1.58963	-1.67135	2.35087	-0.417097	0.0859089	-0.622545	-0.759574	0.220205	0.863822	-0.043612	1.44786	-1.27355	-0.434407	0.155295	0.202924	-0.0589153	-0.709448	-0.350359
5-Hydroxyindole-3-acetic acid	-0.902658	1.20321	-0.577386	-0.231191	-0.681833	-0.000334154	-0.484255	0.839981	-0.15119	-3.58584	0.453817	0.632019	-0.276026	0.194714	1.50548	-0.0233857	1.01751	-0.18475	0.0821538	0.342749	1.07881	-0.764637	0.302936	0.210101
5-Hydroxytryptophan	2.22987	-0.28333	0.582532	1.7346	1.06168	-0.207884	-0.0920661	1.34007	0.518713	1.57786	-0.753546	-0.372534	-0.498493	0.182121	-0.335757	-0.942596	-1.19586	-1.42081	0.418468	-0.456466	-0.137876	-0.95766	-1.2464	-0.744631
5-Methylcytosine	-1.21451	0.256032	-3.47283	-0.274534	0.486449	0.815918	-0.0932462	0.0975925	-0.586795	-0.434961	1.2635	-1.08682	0.0379539	0.721415	0.207189	0.486764	0.704834	1.35881	0.953345	0.0505121	-0.909377	0.218532	0.0134869	0.400725
8-Aminooctanoic acid	0.0868177	0.118281	-0.804021	-0.248056	-0.857205	-0.520366	0.785521	0.383925	1.68048	1.3084	0.123155	0.308645	-0.573697	1.02324	1.56736	-0.458887	0.490901	-1.63787	-2.01282	-0.0479999	0.934401	0.28237	-1.96958	0.0369948
Acetylcholine	-0.991912	-0.876032	-0.935952	-0.339579	-0.722379	-0.162564	-0.463815	-0.271674	-0.741511	1.13123	-0.803105	-0.490884	-0.807296	-0.00615251	0.183946	0.188251	1.19356	-0.731439	0.605942	0.397448	2.93422	-0.92856	0.796217	1.84204
Alanine	-2.65409	-1.0302	-0.362833	-0.638989	-0.516157	0.325738	0.547851	-1.61199	-0.287971	1.24941	-0.223338	0.71562	0.939305	0.00242486	1.04308	0.0235029	-0.434311	1.59294	0.884311	-1.40851	0.803173	0.584044	-0.173967	0.630969
alpha-Linolenic acid	2.02514	2.36939	0.95718	0.0273264	0.927871	-1.26204	-1.25614	0.238223	0.27745	-1.25153	-0.413325	-0.404667	-0.950033	0.441448	-0.742036	-0.64551	0.866122	-1.12285	-0.617165	0.0419026	-0.131068	0.925502	0.529174	-0.830375
AMP	0.0942154	0.353421	0.700088	-0.228187	0.98835	0.751456	1.03275	0.431019	0.381646	1.35521	-1.5126	-0.860318	-0.699501	-1.478	-1.50425	0.0534933	-1.78573	0.333324	-0.497659	0.331348	-1.51536	1.0668	1.26219	0.946294
Anthranilic acid	1.07435	-0.145315	0.619964	0.561682	0.220097	0.0546607	-0.00870619	2.23856	0.669734	0.685456	0.081373	-0.181106	0.14232	0.739711	0.13411	-0.668627	0.107182	-3.49667	-0.690613	-0.783849	-0.13593	-0.318473	-0.779714	-0.120192
Arachidonic acid	0.73537	1.73686	2.03316	0.389699	1.54651	-1.25147	-1.08306	-0.102751	0.133071	-0.0933227	-0.899973	-0.762538	-1.40447	-0.278497	-0.19862	-0.384227	1.32026	-1.30969	-0.981419	-0.092013	1.04358	-0.156737	0.668497	-0.60823
Asparagine	-2.13593	-1.66724	-0.0396401	-0.695314	-0.304843	-1.27145	0.189897	-0.676774	-0.174924	1.72301	0.456212	0.806944	1.71616	0.575566	0.716138	0.228746	0.121789	0.468537	1.21697	-0.805853	0.518348	0.0738006	-1.54215	0.501996
Carnosine	1.52484	0.372644	0.0990238	-0.398926	-0.0742277	1.1388	0.429594	-2.40547	0.210382	-2.02298	-0.335123	0.0429469	-0.0288373	-1.33212	1.28035	0.284865	0.974252	0.463075	-0.179617	0.299838	0.138021	1.45415	-0.802298	-1.13319
cis-Aconitic acid	-0.708867	-0.561334	0.430795	0.141853	-0.241655	-0.334468	0.375346	-0.091098	1.02757	-3.11378	-0.510347	-0.579698	0.882571	1.59539	-0.916406	-0.702409	1.53191	-1.0886	1.00754	0.761682	0.435282	-0.000467843	0.086685	0.57251
Creatine	0.941613	1.0649	-1.2027	-1.74235	-0.0281604	0.531337	0.553491	-0.193138	0.898928	0.142398	-0.880898	-0.907258	-0.950342	-0.646995	1.5606	0.780445	1.2633	-0.455952	-0.229427	1.96283	-0.129339	-0.486946	-1.76252	-0.0838149
Creatinine	0.507931	1.26722	-1.20791	-1.74563	0.239745	0.458995	0.44579	0.130023	0.599373	-0.0696885	-0.822394	-0.801909	-0.956194	-0.674963	1.65937	0.785252	1.31881	-0.692675	0.0602795	1.97594	0.23751	-0.695961	-1.72247	-0.296442
Cystine	-0.574888	-1.83695	-1.12732	-3.38843	-1.22225	0.239952	0.60908	0.975715	-0.0581432	0.582661	0.434427	0.321591	0.506238	0.497359	0.487569	0.317116	0.358091	0.704051	0.35486	0.553993	0.0768944	-0.129424	0.309911	1.00791
Cytidine	1.10567	-0.262615	0.644818	1.07238	0.849509	0.780172	0.725771	-1.72172	0.838671	-1.18908	0.328451	-1.09533	1.04103	1.01077	-0.961696	0.20837	0.983352	0.153449	0.728272	-0.852533	-1.7836	-1.22062	-0.00367796	-1.3798
Deoxyinosine	-0.589704	2.3589	1.02273	0.231801	1.46632	0.0546848	-0.207545	1.77279	-0.321856	-0.0768544	-0.143282	0.70895	0.603111	-0.451452	0.429453	-0.765767	0.16431	-2.02105	-0.192493	-0.0641475	-0.638577	-1.62723	-0.822114	-0.890978
Diaminopimelic acid	0.366998	3.03151	-0.986787	0.236294	-0.256269	0.671925	-0.0653617	0.987827	1.21565	0.32792	-0.601458	-0.29605	-0.747968	-0.565744	0.870477	-0.934164	0.598303	0.402841	0.699715	-1.2006	-0.551209	-0.577095	-1.49467	-1.13209
Docosahexanoic acid	1.14724	1.05141	1.98184	0.989954	1.48489	-1.0654	-1.61317	0.410703	-0.295349	-1.33849	-0.840469	-1.06209	-0.433519	0.410926	-0.0540991	0.010322	1.58567	-1.40551	-0.439929	0.135928	0.521312	-0.516655	-0.221605	-0.443899
Docosapentaenoic acid	1.51017	0.936956	0.705035	0.606779	0.325063	-1.31182	-0.296269	0.703137	-0.556419	-1.55417	-1.16641	-0.992575	-2.02708	0.463611	0.362941	-0.760751	1.53976	-0.988799	0.00887979	0.439214	1.44439	0.41385	0.664837	-0.470304
Dulcitol/Mannitol/Sorbitol	2.06373	-0.976435	0.467996	-0.325864	-0.077739	-1.00914	-0.97018	-0.88314	-0.352168	2.98573	-0.381523	-0.735471	0.743087	-1.31656	-0.613667	-0.343518	0.344432	-0.425879	1.00021	-0.379827	0.779776	0.0649793	0.390204	-0.0490375
Eicosapentaenoic acid	0.873852	1.56672	1.1024	-0.204501	0.927609	-1.20095	-1.14391	0.917361	-0.24793	0.60687	-1.70647	0.292849	-1.91801	-0.890455	-0.496601	-0.594544	1.59033	-1.02525	-0.477044	-0.024464	0.913608	0.575111	0.750718	-0.187301
Epinephrine	0.240778	-0.529847	0.825743	0.381945	1.14838	-0.667749	-1.07798	-0.0741194	0.721792	-2.22975	1.05632	-0.174162	0.97105	-0.0886219	-0.869903	0.610004	1.26234	0.307587	-1.45604	-1.90743	0.0483527	0.0397413	1.64303	-0.181467
Ethyl vanillin	-1.05258	-1.78578	1.1373	-0.910547	1.04146	-0.286598	-1.39091	-0.759183	-1.00554	1.76813	-0.720621	1.37135	0.796061	1.15448	0.0459654	0.454137	-0.540128	0.333516	-1.23637	-0.588154	0.183681	0.0842964	0.786111	1.11992
Fumaric acid	1.12396	1.33464	-0.615183	-0.0610848	-0.887877	0.968334	1.83616	-0.149891	1.30854	1.21582	-0.869601	-0.102681	-0.68821	-0.954373	0.969984	-0.863561	0.68661	-1.01625	0.529969	-1.84889	-1.46	-0.0618749	-0.26169	-0.132848
Glutamine	-1.92624	-1.26053	-0.968382	-0.32849	-0.230081	-0.918104	0.859776	-0.82213	0.370891	1.7581	0.320235	-0.48756	0.956364	0.581506	0.275097	0.883117	-0.240237	0.892873	1.22294	-1.68816	0.16364	0.831702	-1.28886	1.04253
Glutaric acid	0.453405	-1.20117	-0.838703	-0.659993	-2.9788	0.898296	0.661256	0.702629	0.993843	0.816534	0.847321	0.914139	0.144209	-1.31195	-0.877448	-0.0825331	-0.647347	1.31648	0.529904	-0.817473	-0.193316	0.463295	0.164282	0.703153
Glyceric acid	-0.681759	-0.178461	-0.305907	-0.202118	-1.00893	0.250135	0.567827	-1.18246	1.2145	0.720227	0.890508	-0.022456	-0.180198	-0.464856	2.43175	-0.135897	1.39679	0.453433	0.921104	0.248731	-1.26808	-1.7514	-1.69033	-0.0221568
Glycine	-3.09392	-1.09047	0.713206	0.0854584	-0.323116	-0.137374	-0.0814268	-0.70637	-1.15805	0.776133	1.01958	0.318356	2.3407	-0.105585	0.295916	0.437358	0.34308	0.670172	0.617658	-1.02007	0.358291	-0.269514	-0.153929	0.163926
Glycolic acid	-0.138017	0.162082	0.0790388	0.999504	0.0305621	1.09015	-0.0251304	-0.508694	-0.980432	1.44489	1.17795	3.30393	0.226232	-0.450378	-0.220903	-0.800085	-0.938481	-0.536679	-0.378646	-0.630929	-1.18309	-0.767773	-0.635255	-0.319849
GMP	-0.994964	-0.475495	0.373195	-0.353031	0.753947	0.730751	0.888715	0.767928	-0.0450742	0.838317	-2.10389	-1.00431	-0.235666	-0.69254	-1.16806	-0.0493422	-1.28555	0.736364	-0.552336	0.512087	-0.904751	1.20693	2.33056	0.726222
Guanosine	-1.02499	0.00404722	-1.09279	-0.968499	-1.86742	-0.49808	-0.552189	0.448537	-0.333716	-1.65345	1.16299	0.676964	1.27853	0.479283	1.51463	0.265148	1.59944	-0.0780808	0.377993	0.859202	1.36397	-0.807404	-0.393727	-0.760393
Hexose	0.49023	-1.64909	-0.298932	-1.29268	-1.2052	-1.20785	-0.00485017	-1.26901	-0.723769	0.082674	-0.224107	-0.587943	1.04332	2.2178	-0.626895	0.29628	0.99424	0.159532	0.911104	1.52108	-0.616886	0.179173	1.16258	0.649204
Hexose dimer	1.08909	1.23552	-1.3979	-0.327016	-0.620902	-0.0757923	-1.51771	-1.18236	-1.44666	0.954563	1.10185	-0.989183	-0.611354	-0.813059	0.845576	0.807459	-0.722435	1.32223	0.67636	0.999799	-0.738215	1.44491	0.278109	-0.312882
Hippuric acid	0.852364	-0.309784	-0.631235	-0.613772	-0.601981	-0.904128	-0.0674142	0.637446	-1.39565	0.0139935	-1.14959	-0.0814381	0.405412	-0.777597	-0.466543	0.335523	0.624035	-0.26998	3.58794	0.130826	1.23356	-0.481164	0.369386	-0.440211
Homoarginine	-1.27734	-0.34065	-0.159534	0.393048	0.33232	0.390574	-1.94217	-1.4229	-1.99889	0.38257	-0.450371	0.322859	-0.181107	-1.43281	0.5026	0.036123	0.372257	1.5097	1.28763	0.616938	-0.0533385	0.906791	0.597819	1.60787
IMP	-0.522707	-0.0473981	0.733028	-0.609286	1.44157	0.760845	1.12719	-0.519445	0.255704	2.2241	-1.26321	-1.03604	-0.805599	-1.15017	-0.699432	-0.109476	-0.9281	-0.636212	-0.681926	0.45334	-1.16164	0.91661	1.75695	0.501299
Indole-3-acetic acid	0.163416	1.14911	1.16923	0.619904	-0.0545328	-1.3267	-0.346353	-1.5068	0.860603	-0.440215	1.17374	2.36803	0.724481	-0.691455	0.808403	-0.55129	-1.12018	-0.798025	-0.239347	-1.25569	0.491096	0.616805	-1.10053	-0.713697
Indole-3-lactic acid	-0.738795	-1.05677	-0.478949	-0.209914	-1.49946	-1.89801	-0.112854	-0.706171	2.03281	1.10928	-0.403204	1.41519	-0.156785	-0.0924245	0.392091	-0.491767	-0.0242741	-0.480712	0.269686	0.147226	1.95947	1.17951	0.689229	-0.844403
Isethionic acid	2.43081	-0.545286	0.348648	-0.444684	-0.640014	0.0820247	0.140413	1.5521	-0.852186	0.724046	-0.4711	-1.34618	-0.264403	-0.0946248	-1.07391	-0.0606879	0.161953	-1.22955	0.254924	1.5129	0.664383	-1.03557	1.45058	-1.26458
Isocitric acid	-0.826952	0.318116	0.878525	0.335644	-0.0432928	-0.775197	0.673864	0.707279	0.767511	-2.44432	-0.837654	-0.385525	0.984091	1.86281	-0.522486	-1.09497	1.30824	-0.952454	1.17072	-0.75976	0.0898205	-1.24413	0.310545	0.479587
Kynurenic acid	0.538627	1.36737	1.66509	1.52041	1.80798	-0.770606	-1.4786	-0.250324	-1.56304	-0.314889	-1.35406	-0.430712	0.183424	-0.0401376	-0.647591	-0.396275	0.402525	0.772804	0.850305	-1.24877	-0.580453	0.258391	-0.847067	0.555597
Lysine	-1.14979	-1.89682	0.1626	-0.156342	0.332032	-1.74972	-0.383818	-1.25377	0.787586	1.44565	0.292161	0.77706	1.73007	-1.00771	0.116674	0.252113	-0.663185	0.557841	0.561018	-0.689451	0.80556	-0.0751796	-0.565803	1.77121
Methionine sulfoxide	-0.705432	-1.06038	1.2529	1.52912	1.37144	1.087	0.0351161	0.313169	0.0940259	2.18743	-0.352746	0.741965	-0.992222	-0.92537	-0.74197	0.486178	-0.86416	0.255696	0.364902	-0.192987	-0.155063	-1.51045	-1.59064	-0.627506
N-Acetyl-alanine	0.154852	1.61696	0.467766	0.310248	1.99715	-0.264215	0.419877	0.158779	-0.662472	0.076595	-0.311242	-1.12481	0.0324565	0.664966	-0.833864	-0.458974	2.03814	-0.250806	-0.6917	-0.597741	0.46375	-1.34252	0.451264	-2.31446
N-Acetyl-aspartic acid	-0.316591	0.442944	0.491608	-1.07231	-0.498013	0.364924	1.43605	-1.44462	0.36769	-0.0244799	-1.57445	-1.88477	-1.32974	-0.822747	1.25343	0.473826	0.29102	0.0936425	0.540674	-0.494765	0.806752	2.20183	0.330034	0.368056
N-Acetyl-glutamine	0.255576	-0.689119	-1.4186	-1.24627	-0.707995	0.0669003	0.417581	2.31859	0.871603	0.721423	0.0686683	-0.96969	-0.0587743	0.457827	1.3252	0.645514	0.0557442	0.794141	1.11433	-1.43961	-0.911393	0.230374	-1.8417	-0.0603177
N-Acetyl-methionine	-1.27396	-2.07189	0.735535	2.17056	0.118399	0.510825	0.628314	0.634379	1.20971	-1.3577	0.111916	-0.53964	0.713205	0.221099	0.666927	-1.01156	-0.0905572	0.769694	0.784273	-1.72228	0.0418661	-0.662963	-0.698447	0.112291
N-Acetylneuraminic acid	1.22664	-0.554937	-0.508786	-1.34549	-0.734504	-0.448308	-1.05308	1.14434	0.387558	-0.592362	-0.499454	-1.53955	-0.324757	0.28461	0.907184	2.25464	1.42606	0.879703	1.30179	-0.562314	-0.816711	-0.0293239	0.282978	-1.08594
N-Acetyl-phenylalanine	-0.14753	-0.0812193	-0.621015	-0.650493	-0.391164	-0.97077	-0.949938	-0.28828	0.972402	-0.889246	0.180991	-0.300144	-0.350375	-0.610618	1.2045	0.951567	-0.0368509	1.36013	1.32652	0.213058	1.92597	0.541901	-2.75304	0.363649
N-Acetyl-tryptophan	-0.0587955	-0.00737799	0.0827467	-0.321003	0.060747	-0.617337	0.263685	-1.58577	-0.227429	-1.74518	-0.683496	-0.716017	0.0171551	-0.949614	0.86735	1.13075	0.0304002	1.46104	1.31386	1.15305	1.99745	0.358388	-1.89548	0.0708704
N-Formylmethionine	-0.425592	0.913603	-1.07951	0.818984	0.145528	1.16651	0.302947	2.22158	0.287013	-0.869705	-0.598385	-0.596091	-0.0741804	-0.369663	1.98076	-0.894384	0.721782	0.509052	-0.726516	-0.178504	0.724684	-1.13159	-1.66856	-1.17976
N-Iso valerylglycine	-1.31772	-1.97225	-0.185793	-0.27501	0.39542	0.487488	0.0910684	-0.148561	1.29912	0.440379	0.36533	0.194907	-0.102638	-0.471032	0.690887	-0.3985	-0.34123	1.40004	0.412964	-1.37753	0.749335	2.04052	-2.23221	0.255008
Palmitoleic acid	1.74794	1.14081	0.130067	0.0447386	0.649474	-1.61628	0.132941	0.267904	0.910509	-2.65253	-0.22383	-0.248617	-1.21269	0.914104	0.739429	0.0100546	1.04116	-0.296027	0.19704	-0.578143	-0.470532	1.04006	-0.368734	-1.29884
Pentose	0.927983	-1.50474	-0.0732901	-1.33821	-1.0862	-1.14002	-0.567566	-1.43516	-0.71221	0.00163035	0.184735	-0.603278	1.01295	1.94885	-0.677756	0.461046	0.781006	0.323501	0.828693	1.30014	-0.835181	-0.170453	1.48734	0.886188
Proline	-1.813	-2.52374	-0.00183932	0.341924	-0.0258956	0.268083	0.316249	-0.942407	0.463005	1.2141	0.45014	0.886492	0.731741	-0.250785	0.405907	0.0184705	-0.438639	1.22191	0.572229	-0.562432	0.642832	0.346638	-2.24015	0.919173
Pyruvic acid	-0.0439334	-0.584284	-0.578041	1.04085	-0.13464	-1.88418	0.200182	-0.814508	0.344398	-2.68496	0.664218	0.348066	1.51099	1.20827	1.43248	-1.27097	-0.0589574	0.321993	0.495919	0.18855	-0.736574	0.800122	0.302087	-0.0670872
Quinic acid	1.22313	0.761285	1.04458	0.708015	1.29189	1.26025	-1.73809	-0.897937	-0.856818	-0.356276	0.30943	-0.922406	0.888034	1.66679	-1.11721	-0.420364	-0.151325	0.393575	0.867212	-1.32205	-0.439026	-0.203454	-0.466461	-1.52276
Rhamnose	-0.580434	0.343047	-0.490863	-2.34847	-0.548181	-0.0410656	0.247497	-0.427272	-0.433984	0.533099	2.65838	1.07111	1.17434	1.58375	-0.602712	0.732384	-0.591107	-0.547543	0.539189	-0.335645	0.106599	-0.526062	-0.384208	-1.13185
Ribulose-5-phosphate	1.11092	1.16222	-0.90198	-1.61996	-1.94172	0.512524	1.11302	1.08107	1.14104	-0.74402	-0.608467	0.557748	-0.539416	-0.511356	-1.73946	-0.608714	-0.266968	0.624195	1.21881	0.429321	-0.246239	0.361514	1.11423	-0.698323
Serine	-2.61899	-1.31665	0.381435	-0.102017	-0.258475	-1.69053	-0.408708	-0.991979	-1.08136	1.1018	0.36295	0.4369	1.6224	0.33844	0.494735	0.546339	0.32358	0.918372	0.665998	-0.633178	1.22103	0.213803	-0.370472	0.844575
Sphingosine 1-phosphate	0.446645	0.28605	0.889571	0.971949	0.722527	-1.82824	0.770494	0.143389	1.01219	-2.38249	-0.288093	-0.792404	1.62688	0.451799	0.632042	-0.0497921	-1.13134	-0.685789	0.305167	-0.966252	-0.0265645	0.793259	0.556116	-1.45711
Suberic acid	1.53113	2.69028	0.137161	0.575788	-0.140808	1.71045	-0.814498	1.00889	0.00890315	0.481447	-1.28533	-0.494611	-1.39396	-0.207431	-0.53101	-0.509128	0.50165	-0.816111	-1.27135	-0.231752	-0.895083	-0.397881	0.470738	-0.127485
Sugar alcohol	0.939227	0.501622	0.15926	-0.730207	0.15824	0.128295	1.79818	-0.117614	-1.26808	0.355079	-0.961101	-0.0768404	-0.595683	-0.999424	-0.799289	-1.62119	1.48513	-0.462844	1.69365	-1.60224	1.3717	-0.0420454	0.959586	-0.273416
Taurine	0.407547	-0.749216	-1.32768	-2.20727	-0.877479	-0.556933	0.337676	0.304085	1.76597	0.0344367	-0.325438	-1.0145	0.0636888	0.556378	1.69078	1.4952	0.828678	0.387978	-0.0486982	1.29609	-0.0146513	-1.37986	-0.188006	-0.478765
Tauro-a-Muricholic acid	-0.579342	-0.575093	-0.2734	-0.748438	2.98615	-0.647311	0.307392	0.328284	-0.281577	0.185368	0.677839	0.902457	0.175892	1.00605	-0.0408258	-1.92004	0.720967	-0.311985	0.200599	-2.06954	-0.79	0.182776	0.659221	-0.095444
Tauro-b-Muricholic acid	-0.579342	-0.575093	-0.2734	-0.748438	2.98615	-0.647311	0.307392	0.328284	-0.281577	0.185368	0.677839	0.902457	0.175892	1.00605	-0.0408258	-1.92004	0.720967	-0.311985	0.200599	-2.06954	-0.79	0.182776	0.659221	-0.095444
Threonic acid	0.186849	0.82454	1.07865	-0.0113279	1.81173	-0.032737	0.273591	-0.351549	1.73564	1.30709	0.2854	-0.565357	-0.930189	-0.245495	0.459769	-0.474385	0.427837	0.449405	0.134007	-0.804028	-1.44602	-1.14057	-2.55777	-0.41507
Thymidine	1.46293	1.46757	1.19855	0.953331	1.85219	0.518084	0.0368272	1.00476	0.919424	-1.23956	-0.454303	0.264313	0.218313	0.243633	-0.560484	-0.777712	-0.690608	-1.39293	-1.03518	-0.0213023	-0.671108	-0.887291	-0.794172	-1.61527
Traumatic acid	1.17966	2.25209	0.601804	0.894924	0.0518165	0.606844	-0.882744	2.25427	-0.16449	-0.383733	-0.619893	0.216113	-1.5708	-0.0147693	-0.628957	-0.577181	0.0344393	-1.27451	-1.55316	0.0226135	-0.422676	-0.60364	0.833731	-0.251746
Tryptamine	-1.7343	-1.97526	0.533908	0.0812045	-0.960235	-0.446881	0.901873	-0.820827	1.99154	-0.965257	0.443246	0.148442	1.10504	0.020137	0.540428	0.424989	-1.13789	1.03491	0.306024	1.02613	1.20928	-0.300549	-0.327277	-1.09868
UMP	-0.313528	0.0763967	0.194196	-0.613253	0.399954	0.833077	1.12142	0.686972	0.0594807	0.00585437	-2.07386	-0.698409	0.474717	-0.54811	-1.52111	0.190239	-1.62552	0.813841	0.179162	0.968034	-1.99702	0.937516	1.43541	1.01455
Uracil	-0.15875	0.359169	0.944983	-0.151085	-0.314566	-0.086454	0.665885	-0.582894	-0.0149253	-0.953707	-1.30206	-1.08319	0.160943	-0.611379	0.290178	0.0277431	0.737011	0.181683	0.453363	-1.01875	1.14886	-1.91055	3.15977	0.05873
Urea	0.066601	-1.12548	-1.62297	-0.809177	0.651389	0.591082	0.732855	3.18501	0.355381	-0.702475	0.035843	0.556927	-0.161452	-0.482541	0.155135	0.703267	0.0524176	0.0474743	-0.818092	0.816534	0.861706	-1.08272	-1.06233	-0.944383
Vanillin	-1.27173	-2.46753	1.01568	-0.153949	1.08683	-0.559026	-0.843575	-0.2132	-1.50825	1.22544	-0.227729	1.30876	0.428004	1.31813	-0.634991	0.792026	-0.419975	0.198613	-1.19252	0.217559	0.0385475	0.188455	0.406285	1.26814
_-Gluconolactone	0.995361	0.650803	0.633641	1.45902	-0.413039	1.42102	0.855225	1.26806	0.182164	-0.451973	-0.605277	-0.497549	0.470265	0.696097	-1.52002	-0.6093	0.840046	-0.195361	0.753864	-1.27432	-1.77604	-1.92963	-0.574993	-0.378072
(R)-3-Hydroxy myristic acid	0.810045	1.95278	0.556157	0.384339	-0.115669	-0.189656	1.02609	-0.837162	0.855129	-0.803214	-0.619881	-0.25945	-0.362085	0.961854	-0.71882	-0.297956	0.460827	-2.68735	-1.29154	-0.305474	-1.00871	1.31849	0.853215	0.318045
1,2-dihydroxyheptadec-16-yn-4-yl acetate	-0.233477	-0.222521	-0.982605	0.518268	0.313671	0.0295458	-0.977799	0.055889	-0.331723	-3.44668	0.726125	0.454642	0.581932	0.124352	-0.876075	0.54623	-0.586276	0.559249	0.103136	1.19287	-0.62024	0.877668	0.461182	1.73264
1,3-Diaminopropane	-0.253211	-0.17196	0.278972	0.483431	-0.135856	-0.138038	-0.351504	-0.738282	0.536175	0.797557	0.21652	0.702996	0.0144505	-0.156368	0.281587	0.221661	-0.100376	1.37851	1.47836	-1.11176	-0.405791	0.0912176	-3.75128	0.832995
1H-indene-3-carboxamide	-2.11842	-2.03017	1.20016	0.392138	-0.458651	-1.24666	0.882146	-0.467246	1.58706	0.0976041	0.326628	-0.519785	1.25528	0.278544	0.818708	0.0297649	-1.50146	0.328336	0.369123	0.465268	1.04399	0.147939	0.103798	-0.984092
1-Linoleoyl glycerol	1.51327	1.75517	0.620556	0.218916	0.203217	-0.621323	-0.67986	-0.0905703	0.745205	-2.20901	-0.114032	-1.04225	0.1916	-0.804627	-0.385188	-0.101946	0.609551	-0.549943	-1.15979	-0.108261	-0.268608	2.19441	1.04162	-0.95811
1-Methyladenine	-0.930461	0.289859	-0.782488	0.903879	0.179188	0.931258	-0.0454288	0.00639463	0.736503	0.819818	0.771296	-0.481079	-2.4384	-1.61677	1.32866	0.111286	0.713995	1.56601	1.1318	-0.574079	-0.318308	-0.176952	-1.49654	-0.62945
2-(acetylamino)-3-[4-(acetylamino)phenyl]acrylic acid	-0.207205	-0.566845	0.463358	0.29504	0.530512	-0.307513	-1.07129	-1.89682	-0.477028	-0.596192	-0.0191115	-0.15981	-0.136479	-1.33253	0.00574519	1.18481	-0.54098	1.74118	1.41393	0.618709	0.610166	1.94585	-1.84855	0.351065
2,3-dihydroxypropyl 12-methyltridecanoate	0.140436	0.340325	-0.0669171	0.499669	1.53589	-1.29929	-0.87547	0.207435	0.0321811	-3.00349	-0.332566	0.127487	0.320473	-0.165982	-0.495865	0.186836	0.204752	-0.2265	-0.574899	-0.0683663	-0.750052	2.28331	1.1084	0.872205
2,4-dihydroxyheptadec-16-en-1-yl acetate	1.50677	0.202953	0.354945	-0.687913	-0.130546	-0.0882481	-0.482802	-0.147926	-2.25	-1.25497	-0.305978	-0.447543	-0.707855	-1.29296	1.14222	0.520562	0.931318	0.969116	-0.436786	-0.00119937	0.612681	2.56604	-0.219376	-0.352493
2,4-Dimethylbenzaldehyde	-0.902171	0.722159	1.48907	1.03221	-0.242938	0.606602	1.54143	-0.384009	-0.704921	-0.397732	0.529209	-0.0490626	0.287246	0.93866	-1.07492	-1.11002	-1.39298	0.469536	-1.80267	1.72671	-0.33204	-1.44118	-0.224392	0.71621
2-[(1S)-1-Hydroxyethyl]-4(1H)-quinazolinone	-1.865	-0.771833	0.128377	0.00039385	-0.149776	-0.327494	0.464666	1.25401	-0.274104	-3.15349	0.162752	0.255374	0.626337	1.24067	-0.536158	-0.493927	-0.570185	0.749409	-0.0386921	0.853231	0.055675	0.0309313	1.09338	1.26546
2-Anisidine	-0.787324	-0.795733	0.62846	-0.0543163	0.772807	1.41523	-1.31496	0.206646	-1.22282	2.0043	0.883717	0.851864	-0.594509	0.366488	0.286161	0.919374	-1.12597	0.142998	-2.06905	-0.404291	-0.837728	-0.890708	0.854902	0.764458
2-Fluoro-6-(4-methoxyphenoxy)benzonitrile	-0.31605	0.79069	1.16659	0.441932	1.35494	0.362271	0.158673	0.40698	0.833335	1.93646	-0.184263	-0.382101	-2.78015	-0.74889	0.300512	0.00215632	0.615225	-0.388327	-0.140457	-0.740753	-0.784038	0.0281909	-1.96014	0.0272156
3-(2,7-dimethylpyrazolo[1,5-a]pyrimidin-6-yl)-5-(trifluoromethyl)-4,5-dihydro-1H-pyrazol-5-ol	0.889945	0.158137	0.450256	0.0391822	0.902504	-1.27563	-1.30637	-0.785331	-1.02914	-0.405324	-1.5274	-0.895143	-0.680321	-0.922026	-0.883108	0.951926	0.509951	-0.708898	0.78001	1.42607	1.75567	1.00824	1.53402	0.0127744
3-(4-benzylpiperazino)pyrazine-2-carbonitrile	-0.357919	0.206397	1.98852	1.88515	0.861789	-0.52747	-0.588494	-0.380407	0.0358777	-0.323813	0.407255	-0.213916	-1.02697	-1.29875	2.41297	0.0235648	-1.32693	-0.387477	0.0772088	-0.808533	-0.630903	0.544121	-1.15146	0.580189
3-(tert-Butyl)-1-(2,4-dichlorobenzyl)-N-isopropyl-1H-pyrazole-5-carboxamide	-2.02333	0.164976	0.127898	0.110863	-0.588519	-1.89823	-0.304953	0.352318	-1.29516	1.52602	-0.596806	0.283385	0.8764	2.24294	-0.487373	0.185157	-0.361291	-0.16952	0.802297	-0.191993	-0.933634	1.48784	0.402255	0.288454
3-(tert-butyl)-1-methyl-4,5-dihydro-1H-pyrazol-5-one	-0.383889	-1.68538	0.584202	-0.164468	1.20451	1.87901	-1.3539	-0.242966	-1.66143	1.63772	-0.0649992	0.787563	-0.0524093	0.73227	-0.424023	0.649157	-1.20838	0.545753	-1.29861	-0.124609	-0.349151	-0.639666	0.472192	1.1615
3-[2-morpholino-5-(trifluoromethyl)phenyl]-4-phenyl-2,3-dihydro-1,3-thiazol-2-imine hydrochloride	-1.48232	-0.0553376	1.72445	-0.0228242	1.16263	-1.40282	-0.159132	0.502611	0.281364	-3.09047	-0.296822	-0.113938	0.116313	0.0649009	-0.385898	0.140352	0.338465	0.302964	-0.445064	0.0312	-0.270784	1.69458	0.799995	0.565602
3-benzyl-4-hydroxy-5-(4-hydroxyphenyl)-2,5-dihydrofuran-2-one	-0.315967	0.162718	0.500687	0.158399	0.856165	-1.21864	-0.156535	-0.174664	-0.421813	0.688516	0.499254	3.95543	-0.805754	0.349136	-0.00761812	-0.535856	-0.373505	-0.265932	-0.748263	-0.871083	-0.935045	0.15216	0.0477768	-0.53957
3-Hydroxy-2-methylpyridine	-0.754136	-2.30186	1.00524	0.0326276	0.575562	1.40045	-1.14665	0.165631	-0.970175	1.83757	0.656111	0.714288	-0.84526	1.01065	0.357125	0.716079	-1.49866	0.0536135	-0.183994	-0.201752	-0.439266	-1.27502	0.307714	0.784108
3-Hydroxydecanoic acid	0.372639	1.51528	-0.546835	0.128741	0.0763813	-0.602447	-0.0209331	-1.00649	0.022267	-1.70026	-0.282153	-0.0375941	-0.558554	0.690729	-0.237378	0.419029	1.13364	-1.74338	-0.912951	-0.820854	-0.780989	1.96204	1.84569	1.08438
3-Methoxybenzaldehyde	-0.246001	-1.52309	0.621485	-0.172768	0.910666	0.818061	-0.480699	0.507747	-0.943137	1.96698	-0.353823	0.998382	0.107358	1.43283	-0.186801	0.311941	-0.805632	0.462188	-1.19827	0.140255	-0.213089	0.068649	-2.73939	0.516161
4,4'-Bipyridine	-1.23521	-0.394921	1.1133	0.269372	0.226264	-0.753346	0.0639737	0.13077	0.829854	0.333138	0.467139	0.43174	0.709389	0.183338	0.069145	0.239199	-0.617069	0.51379	0.284699	0.466069	0.639869	-4.02014	0.179892	-0.130252
4-Ethynylaniline	-2.45845	-1.65573	1.66705	0.328221	-0.280307	-1.20038	0.241392	-0.0488813	1.33834	-0.197674	0.461006	0.133124	1.39769	-0.17435	-0.115045	0.1691	-1.91368	0.39473	0.0759136	0.823968	0.927492	0.350794	0.132888	-0.39721
4-Indolecarbaldehyde	-2.08427	-1.25117	0.0594892	0.499612	-1.4364	-1.65088	-0.498893	-1.07222	0.360944	0.423891	0.16691	0.700412	1.74483	0.762554	-0.638212	-0.14903	-0.557903	0.0286357	0.816109	0.0166254	1.44077	0.57977	1.5268	0.211626
4'-Methoxyacetophenone	-0.423318	-0.0582446	0.963139	2.06657	0.876215	-1.48854	-1.04808	-0.0807431	-0.968839	-0.124978	0.40569	-0.100145	1.6242	1.32995	-0.183934	-0.496926	-1.8298	0.769387	-0.00197273	-0.279744	-1.54111	-0.587099	0.964524	0.213808
4-Piperidone	-0.690166	0.0490154	-0.501749	0.798561	0.0134057	-0.487432	-0.647343	-0.5013	-0.423894	0.337665	2.11942	-0.349575	-0.175615	-1.82204	0.055573	-0.144155	-2.11434	2.16607	0.213636	0.263374	0.244775	0.31208	-0.402575	1.68661
5-acetyl-2,6-dimethyl-1,2,3,4-tetrahydropyridin-4-one	-1.45701	-0.0422428	0.59927	1.99688	0.822903	-1.50703	-0.692347	0.142302	-0.903025	0.129755	0.371093	0.298822	1.74761	1.31098	-0.18035	-0.479932	-1.50894	0.78552	-0.16037	-0.0412235	-1.49274	-0.744366	1.12578	-0.121339
5-Nitro-o-toluidine	-0.822776	0.0568069	-1.02623	-1.43749	-1.18023	0.276389	-0.948808	1.47015	0.892239	-0.507735	-0.861925	-0.817551	-0.53765	0.873976	0.210393	1.6777	0.730806	0.887228	-0.0900567	1.10782	0.851608	-1.97314	1.05035	0.118139
6-(4-methoxyphenyl)pyrimidine-2,4-diamine	0.0309686	0.548173	-1.69285	-1.31726	-1.33131	1.69514	1.02924	1.8633	-1.07172	1.60957	-0.638138	-0.0226077	0.199588	-0.632967	1.50426	0.133248	-0.489299	0.228432	-0.417377	0.707553	-0.814979	-0.400471	-0.391301	-0.329187
6-Methyl[1,2,4]triazolo[4,3-b]pyridazin-8-ol	-0.304058	0.359007	-3.37096	0.700031	0.604542	-0.155835	-0.0105453	-1.02282	-0.111839	-0.969952	0.618806	-0.30127	0.558214	0.114105	1.31445	0.109307	1.07705	0.984193	1.29125	-0.585811	0.584974	0.218075	-0.956229	-0.744685
6-Methyl-2-pyridinemethanol	-0.887718	-1.5228	0.629897	-0.157348	1.01876	1.50395	-1.28961	0.876591	-1.18911	2.11055	0.810262	0.676278	-0.418258	0.15802	0.0863802	0.28045	-1.36394	0.0483996	-1.68699	-0.253596	-0.55628	-0.361942	0.468873	1.01918
6-Methylquinoline	-2.54735	-1.54358	1.54879	0.146418	0.0187568	-0.914324	-0.177419	-0.384052	1.02254	-0.326764	0.931449	0.342886	1.30521	-0.775013	0.0457666	0.286125	-1.86767	1.02446	-0.185193	0.881522	0.883818	0.0145769	0.117986	0.151054
8-Hydroxyquinoline	1.5991	0.673011	1.08977	1.57961	2.07958	-1.30946	-0.847945	-0.887351	-0.584771	-0.769954	-0.899555	-1.80766	-0.996402	-0.821256	0.411585	-0.196858	-0.480658	0.697913	0.506071	0.177955	0.584943	0.416303	0.29926	-0.513239
9-Oxo-10(E),12(E)-octadecadienoic acid	0.839057	1.31735	0.149283	-0.1443	0.189924	1.21865	-0.533243	0.911224	-1.4823	2.11288	-1.19533	-0.246442	-0.336343	-0.613717	-0.168933	-0.459023	-0.156584	-1.07954	-1.57268	1.07046	-1.49317	1.32542	0.443716	-0.0963662
9-Oxo-ODE	0.536757	1.37541	-0.583896	0.59754	0.0370694	1.22336	-1.86782	0.461848	-1.62614	0.99821	-0.54096	0.122079	0.0264731	0.392432	-0.585551	-0.241895	-0.556666	-0.613369	-1.40199	2.26726	-0.964293	0.768574	-0.650325	0.825897
Acetophenone	-0.261422	0.163778	0.909936	1.30928	-0.879837	0.571904	1.2569	-0.312092	-0.3551	0.0787328	0.32772	-0.0391445	-0.185408	1.30503	-1.73763	-0.434855	-1.19773	1.04964	-1.31772	1.35388	0.116764	-1.87906	-1.09113	1.24755
Acetyl-_-methylcholine	0.182009	-0.255187	-0.178563	-0.62252	-0.809324	0.890284	0.656484	-0.563521	0.781149	-0.545104	-1.38453	-0.550216	-1.30563	-1.91084	0.0513624	1.84186	0.0204142	-0.454496	1.72012	0.978649	1.93955	-0.408201	0.383454	-0.457204
Acetyl-_-methylcholine.1	1.2918	1.64942	0.809559	1.06224	1.0845	-0.171634	-2.98853	-0.570217	-1.57409	0.168611	0.731704	0.411719	0.0914893	-0.14311	0.457568	-0.530567	-1.49182	0.220735	0.323152	-0.151126	-0.224897	-0.102724	-0.410169	0.0563994
Buprenorphine	0.456918	1.43926	1.02622	0.669688	0.577083	-2.073	-0.14413	0.530417	0.747569	-3.25998	-0.131689	-0.0577338	0.392361	-0.188043	-0.28481	0.0527345	0.225979	0.162969	-0.691409	-0.681154	0.104442	1.15875	0.448355	-0.480793
Butorphanol	-0.352231	-0.405777	-0.355255	-0.377893	-0.301201	2.38017	2.15545	1.80914	2.34372	-0.25627	-0.406746	-0.602817	-0.508718	-0.401213	-0.480281	-0.466025	-0.51981	-0.476442	-0.478235	-0.43515	-0.596992	-0.474403	-0.373723	-0.419304
Cetrimonium	-0.13747	-0.416895	0.401806	0.757163	0.861301	-1.22904	-1.03561	0.657878	-0.952764	-3.13112	0.818626	0.152093	0.0277505	-0.166248	0.0537716	0.0552419	0.434518	0.514545	-0.210086	-0.414342	-0.554626	1.86125	0.0949216	1.55734
Corticosterone	-0.746139	-0.78462	0.459042	-0.179332	0.428588	0.410113	1.29777	0.862424	-1.03113	0.576515	1.17189	0.785963	0.840258	1.35432	0.208059	1.08009	0.18361	-1.05713	-1.19832	-1.75617	0.215632	0.29329	-1.57656	-1.83815
Crotonic acid	-0.422362	-0.909512	0.137613	0.568858	1.04744	1.36758	-0.581205	0.851149	-0.361334	1.05336	0.582607	0.572236	-0.0182677	0.611555	0.388871	-0.138089	0.226242	0.432314	-0.29023	-0.0368622	-0.538769	-0.755807	-3.73939	-0.0479978
Crotonic acid.1	-0.0593901	-0.625619	-0.832062	-0.507712	-2.99595	1.09598	0.424404	0.789293	0.514139	0.42815	0.901217	0.82917	-0.0212067	-1.90788	-0.143445	0.263305	-0.535519	1.44705	0.638348	-0.799508	-0.54684	0.728605	0.0572159	0.858266
D-Alanine methyl ester	1.66561	1.55167	0.273011	0.618126	0.839244	-0.23799	-0.47672	-2.17036	-0.775354	0.0414743	0.810197	-1.06864	-0.108305	-0.0764153	1.50068	0.596599	0.315366	0.740407	-0.583325	0.0880943	-0.566995	-1.07738	-2.0346	0.13562
Diethyleneglycol diacetate	0.549301	1.19996	-0.910291	-0.0400416	0.294243	2.31435	0.702196	-0.504423	-0.912526	2.69481	-0.224786	-0.706578	0.108716	-0.0536876	-1.14693	-0.240934	0.011565	-0.336986	-0.780544	0.847513	-1.18489	-0.143219	-0.486891	-1.04993
Dimethyl 2,6-dimethyl-4-(2-thienyl)pyridine-3,5-dicarboxylate	-1.34602	0.0613698	-0.964054	-0.723924	-1.49181	-1.29841	-0.730757	0.585564	-0.606765	-1.76494	1.15187	0.579987	1.59508	0.978823	1.2891	0.265676	1.43705	0.182601	0.284003	0.6132	1.11923	-0.686769	0.00116138	-0.531263
Dimethyl cyclohexane-1,4-dicarboxylate	-0.591757	-1.58013	1.0703	-0.197722	1.09842	-1.28707	-1.54401	-0.0310592	-2.07316	1.7389	-0.245825	0.890816	0.0622049	1.27907	0.151805	0.529677	-0.65468	0.484001	-0.960566	-0.00774489	-0.0753134	-0.0457752	0.875472	1.11414
DL-4-Hydroxyphenyllactic acid	-1.22168	-1.36942	-0.933799	0.605482	-2.13858	-0.342045	0.426016	-0.698688	1.62945	1.2029	-0.0804054	1.16782	0.137104	-0.852893	-0.480755	-0.929428	0.159435	0.60582	-0.345873	0.60186	2.03511	0.817527	0.135867	-0.130823
DL-Metanephrine	0.35078	-0.119417	0.980156	0.951787	2.18264	-0.587112	-1.18125	-0.448201	0.875296	0.127616	1.3548	0.226134	0.0912394	-0.764009	-0.0634278	0.329521	1.07637	-0.440565	-1.346	-2.16578	0.0894759	-0.941678	0.710956	-1.28932
DL-Stachydrine	-0.0471199	-0.985636	-0.467502	0.0143469	-0.126433	-0.0921119	-0.133894	-0.405877	-0.0410361	0.261791	0.165848	0.105893	-1.17864	1.029	0.173198	0.22787	1.0092	0.00314436	1.17193	0.618308	0.460414	-3.70663	0.555596	1.38834
DL-Stachydrine.1	-0.989702	-1.74148	-0.426013	-0.210458	-0.975082	-0.123947	-0.170339	0.0213461	-0.468797	0.60628	0.476354	1.96924	2.92843	-1.06272	0.221626	0.125836	-0.212454	-0.805981	-0.10412	0.0131787	1.19881	-0.891162	0.605663	0.0154786
Ethyl palmitoleate	0.591881	1.48131	1.06538	0.561575	1.39459	0.0767578	-1.11332	-0.511793	-0.130571	-1.78438	-0.563938	0.075078	-0.361396	-0.438113	-0.353141	-0.666934	-0.37749	-1.37736	-1.18289	0.344289	-0.594983	2.36681	1.24925	0.249394
Ethyl palmitoleate.1	0.760028	1.35797	-0.536448	0.386865	0.535544	1.59604	-0.826426	0.884677	-1.33074	-0.0957767	-0.902044	0.815844	-0.440024	-0.116792	-0.0389847	-1.00007	-0.960648	-0.617432	-2.10126	1.49368	-0.972712	1.50234	0.170289	0.436073
GNH	-0.782482	-0.91892	1.20748	0.334953	2.44904	1.07945	-1.5025	-0.585585	-0.924002	-0.10456	-0.66157	-0.153552	1.21906	-0.357498	0.287488	0.868743	-0.905174	0.466089	-1.62744	0.428997	-1.04698	-0.35215	1.00634	0.574775
Hexanoylcarnitine	-0.72747	1.00834	-0.779668	-0.484999	0.194088	-0.955081	0.0894226	0.0668197	0.396936	-2.04984	0.19692	-0.500341	-0.754163	-0.228843	0.941249	1.29301	1.49915	-0.0296237	0.49266	-0.390194	-2.10336	1.41522	1.64222	-0.232438
Hypoglycin A	1.30709	0.565721	1.09589	0.454516	-0.63994	1.07683	-0.905474	1.94553	-1.92071	-0.210404	0.472654	-2.09278	0.672039	0.281262	-1.40132	0.831169	0.116247	-0.704081	-0.58695	-0.00792739	-0.135226	-0.236492	0.696656	-0.674308
Indan-1-one 1-(4,5-dihydro-1H-imidazol-2-yl)hydrazone	0.386434	0.840581	-1.09108	-1.42234	-1.11717	2.30217	0.799082	-1.50964	-0.472448	1.42107	-0.840965	0.536107	0.996176	0.288569	-1.67005	0.940562	-0.263736	0.352539	-0.528273	0.770991	0.0831031	0.0564143	-0.301068	-0.557024
L-Ascorbic acid 2-sulfate	0.0955301	0.77003	-0.41172	-0.722596	1.03717	1.01337	1.56733	-0.273919	2.05969	-1.22044	-0.719241	0.134525	-0.349104	0.43944	0.0135195	-0.0586486	1.14896	0.332402	-0.0568497	-1.76873	0.437837	-0.831107	-0.434544	-2.2029
Linoleoyl Ethanolamide	-1.50166	1.43002	-0.0668971	0.0625925	0.981037	-0.554359	1.19394	-0.390004	2.23937	-1.29338	0.259326	-0.0502528	0.767915	0.40253	0.943832	0.388864	0.835024	0.273591	-0.644649	-1.16491	-1.54281	-0.613337	-1.17724	-0.778548
L-Tyrosine methyl ester	1.001	-0.119009	0.59656	0.0966333	0.076635	1.71244	0.0568134	0.0419521	-0.179063	1.62168	-0.377422	0.72289	0.894309	0.931659	0.0945473	0.441569	-0.0756179	-0.129706	-0.603047	0.355996	-1.9716	-1.61689	-1.58437	-1.98795
mesityl (4-methylphenyl) sulfone	0.942271	0.911697	-0.434534	-0.269217	-0.0899188	2.82796	0.559639	-0.55453	-0.819834	2.46105	0.00509972	-0.828795	-0.12475	-0.583131	-1.1388	0.0595621	-0.287833	-0.187883	-0.860459	0.576068	-1.0664	0.262847	-0.677637	-0.68247
Methyprylon	-0.257387	-0.180777	-0.432279	-0.462033	-0.421831	1.51252	-0.803811	1.69633	1.58976	-0.717341	-2.28826	-1.7801	-0.944653	-0.0550892	0.442743	-0.243435	0.207702	0.333308	-0.765484	0.966302	0.810118	0.691007	0.0522219	1.05047
Mevalonolactone	-0.765705	2.20307	-0.453952	0.774536	0.769581	1.9774	0.132655	-0.175591	-0.395161	-1.07002	-0.426202	0.0793422	-0.608246	-0.936806	-0.261193	-0.810628	-0.589233	0.247071	-0.783622	-1.79529	1.49669	1.48308	0.115817	-0.207592
Monoolein	1.72313	2.23787	0.302069	-0.0712906	-0.0389197	-0.270931	-0.641986	-0.2894	1.0994	-2.48386	0.0136964	-1.21392	-0.203221	-0.889637	0.438393	0.197301	0.919129	-0.476056	-0.592797	-0.686929	-0.32935	1.40949	0.392043	-0.544228
Monoolein.1	0.624809	0.907218	-0.198212	-0.481801	0.98604	-0.432989	-0.338536	0.839054	0.426846	-3.30764	-0.640722	-0.328346	0.85947	-0.0250514	-0.563898	0.0996169	0.792611	-0.774294	-0.601114	0.213014	-0.72105	2.12404	0.180269	0.360668
Monoolein.2	1.26975	1.56494	-0.321821	-0.206801	-0.592195	-1.09651	-0.462459	-0.264966	0.849443	-2.70955	0.830344	-0.739505	-0.485712	-1.02986	0.428131	0.359331	0.986765	0.232583	-0.0149968	-0.413146	0.442239	1.95922	0.274243	-0.859478
N-(2-Methoxyethyl)-3-{5-[(2S)-1-methyl-2-pyrrolidinyl]-1,2,4-oxadiazol-3-yl}-2-pyridinamine	1.39493	-0.431208	-0.399573	-1.107	-0.852337	1.42935	-0.501477	2.77109	-0.626563	-0.0800011	-1.02941	-0.0688481	-0.971802	-1.59187	-0.407175	-0.0354738	-0.285283	-0.628837	0.457033	0.998035	0.982228	0.0856342	1.00456	-0.106016
N,N-Diethylethanolamine	1.33967	-0.303691	-0.551152	-1.26664	0.00610411	3.00649	0.866583	-0.400558	-0.818221	-0.394454	-0.936291	0.655232	1.11146	0.0902046	-0.39379	0.304418	-1.14355	-0.409718	-0.926277	0.290743	-1.10879	-0.711232	0.996707	0.696752
N,N-Diethylethanolamine.1	0.459778	0.581863	-1.49801	-0.226878	0.938123	3.02786	1.53439	0.735353	0.396552	0.580307	-1.02299	-0.268335	-0.243641	-0.496901	-1.38385	0.683805	-0.469179	-0.35649	-1.10924	0.238618	-0.758188	-0.2626	-0.385172	-0.695176
N,N-dimethyl-N'-[2-(5-oxo-4,5-dihydro-1H-pyrazol-4-yl)phenyl]iminoformamide	0.130466	0.278805	-0.424319	-0.600327	0.283854	1.97595	0.244314	-0.391449	-0.632578	1.59209	0.116053	0.716448	0.380827	-0.137838	-3.6099	0.557886	0.12622	0.188526	-0.677131	0.694007	-0.2344	-0.148086	-0.352396	-0.0770167
N1-(1,3,5-Trimethyl-1H-pyrazol-4-yl)-2-cyano-3-(dimethylamino)acrylamide	0.767268	0.338093	-1.43736	-1.67229	0.519621	0.0275193	1.0702	1.04294	1.58505	-0.385047	-0.838029	-1.28427	-1.56388	-0.173241	0.708232	1.39017	1.24579	-0.886873	-0.248882	0.996322	-0.753448	-0.606564	-0.498198	0.656885
N6,N6,N6-Trimethyl-L-lysine	0.490724	-0.794073	-1.43475	-0.246155	1.44631	0.383758	-0.1757	0.720729	-0.160565	1.91465	0.866944	1.23573	-0.918554	-0.887954	1.03251	-0.232199	0.42082	0.453757	-0.00329938	-0.59144	-0.290927	0.0732706	-2.70489	-0.598701
N-Acetylputrescine	0.72241	0.433681	-0.931398	-0.181671	0.419562	1.03957	-0.110723	-1.25722	-0.290692	-0.925682	0.71322	-0.846525	-0.779937	-0.921611	1.49961	0.412888	0.170095	2.31217	1.31062	-1.16525	-1.10692	0.193978	-1.47995	0.769788
N-Acetyltyramine	0.344323	-0.121906	0.983293	0.949882	2.17291	-0.588647	-1.17635	-0.44552	0.863517	0.136075	1.35642	0.228057	0.108319	-0.751462	-0.0628162	0.33485	1.07568	-0.436881	-1.34987	-2.18075	0.0925966	-0.931371	0.703954	-1.30431
N-Benzylformamide	-1.32628	-2.25866	0.128419	0.143626	-0.99597	0.660907	1.10311	0.187841	2.15809	0.965654	0.215361	1.13385	-0.502987	-0.590968	-0.705229	-0.528625	-0.800858	0.251654	-0.52027	-0.515276	1.53041	0.827801	-0.870097	0.308502
Nicotinuric acid	0.925285	-1.07947	0.412853	0.10557	-0.757896	-0.0603491	0.164476	-1.24255	0.664334	0.257192	0.30572	1.66257	-0.525534	-1.97587	-0.131862	0.0866802	-0.0298744	1.12827	1.02848	-0.585882	1.64467	0.479682	-2.33398	-0.142523
Nicotinuric acid.1	-0.951169	-1.61433	0.289964	-0.257505	0.634351	-0.808078	-2.24376	0.605891	1.44678	0.385434	0.773201	2.23071	-0.194398	-0.194567	0.290318	0.223079	0.267337	1.20121	0.200408	-0.867503	0.207945	0.497054	-1.00256	-1.11981
N-Methyloctan-1-amine	1.72967	0.273121	-0.37169	0.672633	0.328549	2.41573	-0.642587	0.364226	-1.16486	0.892027	0.102758	-0.552352	-0.226884	0.059911	-0.78746	0.119918	-0.992434	-0.237448	-0.588357	-0.161885	-1.90249	-1.48882	0.838327	1.32039
Nor-9-carboxy-_9-THC	-0.0940519	-0.00323015	1.2216	1.43895	1.90706	0.0777821	0.638887	0.438363	-1.83444	-1.33772	0.40645	-0.371045	0.772406	0.751068	-0.712999	0.319069	-0.468677	-0.443738	-1.57003	-1.17069	0.985952	0.235973	0.39959	-1.58653
Noroxycodone-d3	0.860584	0.112625	-0.811474	0.0363648	-0.175025	0.167744	1.04421	2.36633	-0.540403	-0.285011	-0.243326	-0.87769	-1.25702	-0.947545	2.29689	-0.788827	-1.1213	0.238243	0.0622692	0.778006	-1.47242	-0.656724	0.588653	0.624837
NP-005614	-1.32061	-2.02056	-0.89925	1.44323	1.72131	-0.365248	0.20364	1.30346	0.606763	-1.13479	1.70845	0.286812	-0.465088	0.176985	1.20873	-0.717655	0.496111	-0.711959	0.525299	0.056026	-0.116493	-0.773088	-0.911372	-0.300694
Oleoyl ethanolamide	-0.351182	2.52595	0.966352	-0.144113	1.26325	-0.675449	-0.114904	-0.367738	1.14051	-2.06258	0.408255	-0.0840357	0.61973	-0.721314	0.608138	0.406466	0.731636	0.433658	-0.550623	-1.70929	-1.18097	0.0535075	-0.359989	-0.835263
PEG n12	1.03974	0.0224995	0.247728	0.726405	0.87257	1.76154	-0.313628	1.69144	-0.96303	1.45931	0.670051	-1.68244	-0.922872	-0.123278	0.833781	-0.44923	-1.12514	-0.564047	-0.726927	-0.199614	-1.81644	-0.907876	0.332035	0.137426
PEG n6	0.996776	0.224949	-0.790418	0.0925954	-0.278539	0.181191	1.08061	2.4032	-0.527302	-0.253564	-0.170346	-0.71977	-1.23562	-0.922639	2.33068	-1.02643	-1.10338	0.17811	0.124299	0.706013	-1.34216	-0.773962	0.488778	0.336933
PEG n7	0.971903	0.355554	-0.706836	0.0260276	-0.183495	0.425524	1.22881	2.38396	-0.370525	-0.335696	-0.118212	-0.789501	-1.40582	-1.01983	2.18874	-1.0896	-1.08964	0.147066	0.127555	0.67998	-1.27792	-0.775629	0.41388	0.21371
PEG n8	0.877744	0.238972	-0.599771	0.0561511	0.0435125	0.562661	0.976428	2.47778	-0.46977	-0.16451	-0.0360536	-0.851191	-1.32713	-0.955158	2.20919	-1.0191	-1.18951	0.101871	0.00622074	0.676572	-1.26975	-1.03991	0.430689	0.264073
Perfluoro-1-octanesulfonic acid (PFOS)	-0.289765	-2.07544	-0.53422	-1.2595	-1.21294	1.67615	-0.794586	1.513	-0.69075	-0.873033	-0.988778	-0.847142	-0.343901	0.63227	0.158724	0.421246	1.71963	-0.0715689	0.659327	1.14122	0.236236	0.694502	0.615202	0.514119
Perillartine	-1.16671	-2.47914	0.855648	-0.304162	0.764929	-0.326064	-0.982765	-0.191543	-1.45791	1.10849	-0.349928	0.969242	0.0808548	1.39229	-0.0649256	0.866201	-0.926879	0.668672	-1.07348	0.0192223	0.0297859	0.0119365	1.02201	1.53424
Phloroglucinol	0.559827	-1.03961	0.143854	-1.46476	-0.728302	-1.17658	-0.627574	-1.556	-0.966701	-0.12141	-0.143023	-0.366685	0.794689	1.92527	-0.292747	0.557683	0.574416	0.191723	0.676261	1.16132	-1.38089	0.267482	1.80949	1.20226
Putrescine	-0.396955	-0.300273	0.351764	0.570712	0.0172747	-0.230077	0.393117	-0.352365	0.253777	0.278702	1.02092	0.468621	-0.176734	-0.638529	0.762466	-0.117075	1.09356	0.868485	1.20868	-0.86753	0.333034	-0.420627	-3.87573	-0.245216
Pyridoxamine 5-phosphate	-3.16361	-0.567743	1.09669	-0.361519	-0.191723	-1.93424	-0.16863	-0.44483	0.702814	0.64011	0.406989	0.515555	1.71869	1.15548	-0.251256	0.134951	-0.727799	0.653516	-0.424241	0.267128	0.527809	0.323135	-0.0771934	0.169927
Pyroquilon	-2.2906	-1.4356	1.7568	0.333107	-0.523474	-1.1092	0.543543	-0.776404	1.53866	0.865189	-0.141625	-0.0456065	1.26103	0.97592	-0.844129	-0.347752	-1.28204	0.264297	0.550622	0.0303514	0.89818	0.569088	-0.15281	-0.637554
Quinoline	-2.71989	-1.20702	1.54464	-0.290219	0.127333	-1.52996	-0.0937987	-0.313946	1.29017	0.168593	0.917204	0.302903	1.48749	0.00201873	0.67428	0.182841	-1.69648	0.491346	-0.221387	0.460424	0.688412	-0.0353503	-0.0825752	-0.147023
Quinoline.1	-1.57986	-1.02564	-1.20867	-1.06149	-0.54464	-0.682341	0.3523	-2.25307	0.337623	0.386754	1.25073	1.46077	0.926323	0.588894	-0.648818	0.905905	-0.930501	1.2406	0.735043	-0.163828	1.09528	0.103813	0.524155	0.190662
Thromboxane B2	-0.592522	-0.562008	0.612487	0.405177	0.366446	0.803391	0.766837	-0.434462	1.73347	1.10642	-1.11319	-0.0857621	-1.22704	-0.485744	0.682737	-1.33881	-0.720154	0.581215	0.339269	-1.27814	0.354821	-1.32492	2.33009	-0.919604
Tranexamic acid	0.775718	-1.08289	0.126867	0.128294	-0.247204	1.28997	-1.93312	0.62623	-0.282129	-1.08698	-0.128371	-0.162666	1.83152	-1.77283	-0.137978	-0.430364	0.269145	1.23661	-1.22793	1.38311	1.14319	-0.703377	-0.273714	0.658882
trans,trans-2,4-Heptadienal	-1.86011	-1.79464	-0.176468	0.352844	0.593737	1.8972	-1.22203	-0.491694	-1.34207	0.923506	1.09721	0.844735	1.31791	0.694343	-0.696235	0.240744	-0.682355	0.353674	-0.60153	0.349112	-0.405114	-0.635086	0.0170621	1.22525
Tris(2-butoxyethyl) phosphate	0.978318	0.250266	-1.18622	3.13946	0.269406	0.908427	-0.413347	0.982687	0.58559	0.399343	-0.971211	0.823595	-0.42457	-0.486741	-0.011416	-0.321265	0.850466	-0.749497	-1.10084	-0.165541	-1.44595	-0.2699	-0.777809	-0.863253
Vindoline	-0.807046	1.40731	1.13383	0.406423	1.20934	-0.914426	-0.500926	-0.3623	0.188702	-2.91894	1.18351	0.408182	0.0260228	0.00661472	0.539304	0.0921912	1.04874	-0.314088	-0.173163	-1.08737	-0.135614	1.34129	-0.939044	-0.838549
_-Hydroxynorfentanyl	-1.31059	0.173623	-1.29641	0.183117	2.04083	1.07837	0.701876	-0.806644	0.451063	0.21307	-1.19503	1.88373	0.914698	-0.650316	-1.34075	-0.619455	-0.435538	-0.224741	0.840499	-0.0694217	1.41632	-0.359155	-0.954955	-0.63419

## Sheet: 250 Passed Quality Control(raw)
Sample	Group	1-Methyl Adenosine	3-Hydroxy-2-methyl-4-pyrone	3-Methylhistidine	4-Hydroxyproline	7-Methylguanine	Adipic acid	Allantoin	Allopurinol	Arginine	Carnitine	Citric acid	Citrulline	Cortisone	Cotinine	Dodecanedioic acid	Galactonic acid	Glutamic acid	Glutathione disulfide	Hexadecanedioic acid	Hexanoyl Glycine	Histidine	Hypoxanthine	Inosine	Isoleucine	Lactic acid	Leucine	Linoleic acid	Methionine	Myristoylcarnitine	N8-Acetylspermidine	N-Acetyl-glycine	N-Acetyl-ornithine	Nicotine amide	Nicotinic acid	Pantothenic acid	Phenylalanine	Pipecolinic acid	Pyroglutamic acid	Sebacic acid	Succinic acid	Tetradecanedioic acid	Thiamine	Threonine	Trimethylamine N-Oxide	Tryptophan	Tyrosine	Uric acid	Uridine
SUMJUV20_1	Stage1	8220852	1711823	118948836	3027213	6101954	5222293	32228365	122541	8378086	697038929	113478790	3036641	322674	27550179	6929712	51111327	24184414	20192068	1779757	1448568	8331802	20816377	10497402	8773543	1268728063	15297915	13142129	5628140	4425021	19270630	203142	763038	458215503	20418296	7718069	35319534	14969024	23082473	5254773	180492160	3379065	9963920	4607931	3615441	18253195	12132652	25680875	15415271
SUMJUV20_2	Stage1	5525759	813263	126305596	3578912	5174772	3379162	16023569	127559	853936	800007895	108004634	746746	510803	63773960	10702576	47215145	22705852	30982419	3392462	961521	12593223	19164502	11327025	4049702	1309032906	7214930	9295279	4932249	11403886	8610023	186512	627475	408436559	1774547	5892683	23113565	24828707	18458847	6748913	147438541	7354608	13354345	3701584	1041538	15036465	5727788	11495444	13292919
SUMJUV20_3	Stage1	5374067	360997	82629473	3161369	3456815	4707220	14422209	93149	12410172	1007246426	24453161	1042857	2382936	92619815	3382776	30918494	16228581	17299821	889436	471708	16761760	15612255	8840602	7562201	1033388850	13541434	8195486	7041015	5146093	6406899	111503	369854	258749943	10815528	7247457	33737576	15966308	17955046	2039065	73623897	2104612	5679564	8695322	425404	26310531	13932814	23658190	8725393
SUMJUV20_4	Stage1	5114530	454903	89395191	2548759	4972254	6163986	18520366	74136	13586862	961230047	49948574	1426276	1195780	81264093	5860675	39372581	21918002	20252487	812985	1244685	16671137	11548129	5686635	6267950	1326578860	11531989	9913784	9120754	4264259	8503129	249875	416659	163583011	12515179	6450599	31201698	23948144	20584418	3414353	100158502	2516117	7553280	9182433	1118377	24989294	16292701	18430376	7841152
SUMJUV20_5	Stage1	6376723	1044458	58066905	2307953	4375476	1642255	13388439	60228	11647907	857056858	25445030	1018052	578639	72274458	2664535	14143764	21270303	25030398	444339	645197	13629176	15183928	4945858	3643701	1068848164	6849340	6807137	6188659	3032537	5305215	124302	412893	319838120	3566324	8876135	23000187	15218043	19456235	1811814	24472782	1310889	6586018	6074184	608676	17248101	8427151	9479488	7710618
FALLJUV20_1	Stage2	7229122	327828	152061416	5923208	4868750	8089923	19069403	186262	4447568	1402482088	164072874	1406159	122295	90223481	15393743	28109191	33555142	19574870	2242568	3586336	20044490	20168916	17757203	10543932	1619349483	19911914	2521912	10106100	3541731	6697502	186143	619130	308131570	7602187	12325949	42147411	31832999	24337161	8389902	162657617	5968634	14615617	10271170	1757250	24168438	22662807	31331991	12324201
FALLJUV20_2	Stage2	2860483	445813	87925789	2667953	2460090	1461566	13541267	143025	8525622	1189692071	130374156	1198012	204790	103520472	5428219	21243241	28803205	7042536	472420	3890778	19878608	14094826	12653584	10128484	1353128266	17939787	4478755	8597283	1570270	4362674	127557	355611	180170481	9657908	8264963	34492545	25017956	27547843	2018699	166914698	1613595	6243540	9849029	527945	26148851	22425130	22925905	8544880
FALLJUV20_3	Stage2	9256409	723122	140830172	3617112	5482797	2769917	19767754	152093	3237874	1038381145	71190470	652808	304115	153209729	4492266	27114633	17479931	6664268	789564	2971952	4749939	8267615	14176641	7712780	797775086	13327911	2495569	7073745	4102084	12230881	285590	370472	236000166	1800751	6086009	30313719	16134499	17421150	3543204	76867416	2471262	7799903	7467838	782202	18938838	11163691	31241174	13564208
FALLJUV20_4	Stage2	3761182	493529	67321847	2355888	2984329	7252072	18046127	143573	17807442	1420456361	136174982	1796749	25554	76617698	6217697	37259039	27498698	16393274	559110	11078560	27433932	17074530	12340760	15192978	1292461230	29636814	13800856	12337818	4141386	10194991	174915	286069	387987351	7883010	10110267	46153106	22688140	27337575	1713530	186471278	1805749	8933381	10333739	372243	37102239	40620105	17355082	6585996
WINTERJUV21_1	Stage3	1629970	111445	75843431	2458125	1689196	1037944	10521928	73069	9639179	1050359461	16191506	1529070	66957	4082009	5157898	8062916	23153978	16615727	528542	1988816	9006863	15960543	6987030	4515054	917234679	8290004	492133	7529728	361602		107346	385543	101111416	4408350	4207907	19586641	14226285	10370956	2786149	70226290	1554106	5310537	9173897	1850943	13876143	14302957	5664477	5709169
WINTERJUV21_2	Stage3	3150351	244234	119580632	2220157	4660111	878189	15660738	158270	10763568	916551750	46656248	1166961	166142	103459582	2442044	13117863	18529689	445599	185936	1110078	15969217	13268161	15391576	7062775	1111665441	13007490	4426106	7514810	1114815	1496499	144175	354225	174755708	6704607	6725046	31044738	42973218	21314389	1799535	96558002	508524	10183174	10122814	1905525	24031881	11458690	12255834	7467436
WINTERJUV21_3	Stage3	2435107	290250	136690281	16580574	2738220	1488943	17053321	178203	13303824	1052688712	34494975	1737105	206996	109424453	6519253	14359170	17163993	1624670	433060	1544674	15113338	11633944	16124299	10368832	1141166105	20213248	4004335	10344515	1555162	1000902	126390	919485	91429410	21654845	3856603	36952195	32991522	17242380	2534392	66543287	1507886	6832858	13422321	3128000	22043211	18181697	14202280	8652714
WINTERJUV21_4	Stage3	3644245	211637	91101568	2643989	2809552	874817	10636313	109621	6663936	765930211	42386939	817415	231847	114460516	2292862	18372301	15676081	285936	239705	1966205	16842283	10963522	10011573	5076523	1059320255	8501820	4695794	6484736	719514	6617935	107637	240679	122723172	3709588	6240699	23777620	25319500	16477375	1375730	128268949	687648	5851901	9903755	2637151	23735876	9589275	15679225	7980938
WINTERJUV21_5	Stage3	2938978	491139	58370587	1733865	1867018	827029	6281827	67107	6934523	591010059	79438492	713493	247165	128158047	2473621	10580871	13164157	556019	499685	1516075	12494818	9427304	5360351	4909144	666986122	8828396	7848208	4702695	834449	5794799	121691	160169	190313713	1035618	3991782	21370195	26143288	15899948	2124934	36414394	1114059	6310444	5521398	532928	14900149	8793546	8336815	4579015
SPRINGAD21_1	Stage4	4492832	240659	114833995	2426708	4174876	1141869	14029578	141716	6511986	1498728717	56157916	1102561	254938	65895148	5348061	11827612	33706901	5135361	483987	4473669	10675547	17750633	13152168	5809961	1168959246	10072280	6019881	7492170	2369763		144161	492364	159787342	4601039	6772821	31512715	24413950	15664702	2636867	74547801	1641204	11401530	9158170	2045380	22242066	9310221	10222874	9330981
SPRINGAD21_2	Stage4	3988807	211476	138437643	3594413	3268059	1229455	13900453	142502	3315917	1631150520	27027459	956275	163324	64520903	3816592	8532624	20899821	1530533	253914	1205770	24057663	13295273	13358495	6233740	1021937696	11312696	2241636	4827532	2089370	1975483	133707	366055	245593142	4282866	4249211	29921339	30091794	19055244	2113183	77842169	766703	6315433	7862650	1848572	19075285	7912597	13834140	7044904
SPRINGAD21_3	Stage4	5436278	498666	120382607	2436171	4621671	1763304	13086880	149689	1073654	1273058412	87984771	751810	201945	64185821	5419202	20615826	25239731	2149082	829112	997148	7922836	15159877	13723801	6653134	1029462671	11124129	8227069	5194328	1917371	2772754	297897	550193	129009000	2480459	6768914	30375147	14775250	20859542	2790002	137933362	1678688	7818563	8532936	546357	14761928	9490458	16216825	9898730
SPRINGAD21_4	Stage4	3413229	63985	88835569	2905827	3419722	1742025	13774261	98247	12194936	1141886389	17372208	1056669	23937	128405843	2716216	9249286	22385670	1637117	252826	1770753	19852302	10010075	8260899	7449456	909837555	12782499	3383931	5164120	1849599	1142776	139090	499498	184438907	8059999	5478240	33826114	45247714	13653753	2073473	79032657	672424	7139352	9773217	66827858	21226603	11948794	13023680	5080561
SPRINGAD21_5	Stage4	3665767	207795	104763311	6571368	3965998	702753	15429043	153537	4014747	1324755366	33183758	798666	106092	83565786	2225215	22050799	19481695	1281408	252991	1464723	21000753	11087264	12748234	6823448	1138257687	11268485	4012092	5856604	1155813	1249366	106183	830756	109850558	10198573	5987974	33445090	21098270	22056815	1850718	123612536	712285	6217937	8757574	7581300	21818245	11672840	17642423	7391208
SUMAD21_1	Stage5	6424803	684266	112926890	3196082	3644423	1605263	17045905	209770	10034878	1380010593	25084602	1231901	95799	153342995	7158346	9697952	17885005	2586286	867054	780702	8233317	7658629	19477607	8719728	790186631	15404219	3235367	6982636	1937908	3078290	215328	659178	271681608	3398092	5941293	34375764	44508770	17124585	4436630	47063121	2267364	5213171	7838270	1330420	29437823	12030529	22015316	12222632
SUMAD21_2	Stage5	3536240	181690	176308328	4993209	3042269	1434902	16351161	160045	3145428	1320879699	25231944	1078695	182133	94176388	5523062	12912665	26003634	656052	535016	2066672	9279070	18686356	14516966	10146212	1063847044	17738093	2886819	10354737	1206564	8557798	159214	1414919	174994963	34720684	5423108	47873236	14440981	22664901	2298202	34658363	1912377	5305866	14175438	1539261	31573841	29227042	21813105	8763204
SUMAD21_3	Stage5	3427241	236483	133676366	2839306	2643305	1201974	12874357	93174	944408	954532884	61323721	1278646	291182	93086687	6491304	10987861	15996268	2105426	1350780	2056484	13909614	6793729	8985301	5664185	1084368723	10214641	8293152	5341500	8203668	1916986	178942	1457982	152479578	4413959	4164416	30952391	32177778	23521655	2962622	127802966	3578440	3934648	8970041	7207882	20535648	16583202	10938364	5016970
SUMAD21_4	Stage5	4539778	875215	107374178	2171037	3058233	1557584	9415934	110285	3371503	1097229579	32276703	590802	24614	152721798	5343743	18431652	14736398	122156	679267	348522	11637144	12819446	10043628	4112605	1219742462	7653025	2963845	3588631	3448262	4127839	164430	1411495	244742686	1939045	6213748	24300156	24633382	11145880	3831991	170943752	1416622	8037505	3524376	2438113	19256621	7441188	21035714	7867949
SUMAD21_5	Stage5	2680448	92030	86919851	1971406	2557604	1943360	13086307	99336	8037149	1000930151	19447855	951531	21759	161467071	5046364	12371769	15099272	179600	511910	2040636	15940634	8066093	9413128	6533464	905090388	11302590	2078773	4669479	759323	2317455	122229	1421128	154447937	9542103	6266613	33983118	30188058	20070839	2536833	102361917	1695379	2644359	9308288	6939902	16235485	10566628	16850122	9945856
[truncated: 202 more columns]

## Sheet: Annotation level 3 (raw)
					DP	6.30593	3.69275	10.5169	2.68355	8.89021	4.055	6.6628	10.8231	8.60503	6.89314	2.62039	5.48946	6.30179	5.13229	2.52311	5.56438	4.2141	4.65565	10.7226	3.21462	4.97429	2.83646	5.30218	4.21527	5.01427	4.3257	5.86394	2.94728	21.2605	6.68273	3.99355	6.87003	15.3307	11.1246	4.92773	6.53264	5.37354	3.81704	9.34626	5.60418	4.56229	3.77258	4.39833	2.20172
					Relative precision (%)	14.3449	19.3333	8.493	14.3485	10.5091	14.8208	10.5761	18.3372	14.9321	13.439	8.9263	17.241	8.58976	17.1147	17.078	17.9148	13.1234	8.21934	17.4741	17.9281	11.7984	15.6438	9.90455	16.5595	10.9828	16.7503	8.43694	19.9491	18.4219	19.4177	19.6287	18.6265	15.7254	14.9313	17.9081	16.225	12.8508	10.3974	2.85721	19.9355	18.2743	19.118	17.2161	14.8505
					LOD	17095.3	6259.56	12914.5	117985	34539.1	32640.1	8241.46	10219	25208.8	181969	47762.5	23046.8	80361.8	34145.8	81067.5	40774.5	42012.5	62797.7	297941	19341.2	21899.9	16849.6	22476.6	48539.2	967260	64650.1	218688	16249.1	41498.2	14340.6	6601.58	7401.3	76751.9	139334	14754.3	11324.2	76845.9	37894.6	5382.31	39032	145281	34367.1	39989.4	9378.2
					RT [min]	7.88	5.772	2.525	1.591	4.833	8.466	6.93	6.884	6.277	5.507	6.822	9.362	12.613	9.918	10.585	11.114	10.725	10.384	8.511	9.614	11.766	9.672	10.273	9.844	14.342	9.906	9.995	6.964	2.165	5.204	1.587	4.934	8.312	7.95	7.2	8.945	10.569	8.204	1.317	13.384	7.72	13.391	8.945	5.461
					Molecular Weight	354.241	376.138	148.037	148.037	162.116	244.204	732.394	434.213	308.101	130.111	208.073	397.319	392.271	416.233	507.333	527.301	527.301	499.268	499.27	499.27	529.317	529.317	529.317	475.27	344.293	451.27	519.333	410.099	185.105	185.106	426.088	173.117	514.257	408.272	568.326	310.214	425.35	506.213	337.017	340.178	386.173	386.175	316.167	418.31
					Formula	C20 H34 O5	C17 H20 N4 O6	C5 H8 O5	C5 H8 O5	C10 H14 N2	C14 H28 O3	C33 H66 O13 P2	C24 H34 O5 S	C14 H16 N2 O6	C6 H14 N2 O	C11 H12 O4	C23 H43 N O4	C27 H36 O2	C21 H37 O6 P	C25 H50 N O7 P	C27 H46 N O7 P	C27 H46 N O7 P	C25 H42 N O7 P	C25 H42 N O7 P	C25 H42 N O7 P	C27 H48 N O7 P	C27 H48 N O7 P	C27 H48 N O7 P	C23 H42 N O7 P	C20 H40 O4	C21 H42 N O7 P	C26 H50 N O7 P	C22 H18 O8	C9 H15 N O3	C9 H15 N O3	C13 H22 N4 O8 S2	C7 H15 N3 O2	C29 H38 O8	C21 H36 N4 O4	C30 H48 O10	C18 H30 O4	C25 H47 N O4	C26 H34 O10	C13 H11 N3 O4 S2	C20 H24 N2 O3	C22 H26 O6	C22 H26 O6	C19 H24 O4	C26 H42 O4
					Annotation level	3	3	3	3	3	3	3	3	3	3	3	3	3	3	3	3	3	3	3	3	3	3	3	3	3	3	3	3	3	3	3	3	3	3	3	3	3	3	3	3	3	3	3	3
					Name	(-)-Prostaglandin E1	(−)-Riboflavin	(+/-)-2-Hydroxyglutaric acid	(+/-)-2-Hydroxyglutaric acid	(+/-)-nicotine	(±)-3-hydroxymyristic acid	(15R,21S)-18,21,24,24-Tetrahydroxy-3-methyl-18,24-dioxido-12-oxo-13,17,19,23-tetraoxa-18lambda~5~,24lambda~5~-diphosphatetracosan-15-yl 12-methyltridecanoate	(1aR,5aS,7aS,8aS,9aS,9dS)-5a,7a-Dimethyl-5'-oxoicosahydro-3'H-spiro[cyclopropa[4,5]cyclopenta[1,2-a]cyclopropa[l]phenanthrene-8,2'-furan]-3-sulfonic acid	(1E)-1-[2-(2,6-Dicarboxy-2,3-dihydro-4(1H)-pyridinylidene)ethylidene]-2-pyrrolidiniumcarboxylate	(1Z)-N-(4-Aminobutyl)ethanimidic acid	(2E)-3-(3,4-Dimethoxyphenyl)acrylic acid	(2E)-hexadecenoylcarnitine	(2E,4E,6E,8E,10E,12E,14E)-15-(4-Hydroxy-2,6,6-trimethyl-1-cyclohexen-1-yl)-4,9,13-trimethyl-2,4,6,8,10,12,14-pentadecaheptaenal	(2-Hydroxy-2-oxido-1,3,2-dioxaphospholan-4-yl)methyl (9Z,12Z)-9,12-octadecadienoate	(2R)-1-{[(2-Aminoethoxy)(hydroxy)phosphoryl]oxy}-3-hydroxy-2-propanyl (11Z)-11-icosenoate	(2R)-1-{[(2-Aminoethoxy)(hydroxy)phosphoryl]oxy}-3-hydroxy-2-propanyl (4Z,7Z,10Z,13Z,16Z)-4,7,10,13,16-docosapentaenoate	(2R)-1-{[(2-Aminoethoxy)(hydroxy)phosphoryl]oxy}-3-hydroxy-2-propanyl (4Z,7Z,10Z,13Z,16Z)-4,7,10,13,16-docosapentaenoate	(2R)-1-{[(2-Aminoethoxy)(hydroxy)phosphoryl]oxy}-3-hydroxy-2-propanyl (5Z,8Z,11Z,14Z,17Z)-5,8,11,14,17-icosapentaenoate	(2R)-1-{[(2-Aminoethoxy)(hydroxy)phosphoryl]oxy}-3-hydroxy-2-propanyl (5Z,8Z,11Z,14Z,17Z)-5,8,11,14,17-icosapentaenoate	(2R)-1-{[(2-Aminoethoxy)(hydroxy)phosphoryl]oxy}-3-hydroxy-2-propanyl (5Z,8Z,11Z,14Z,17Z)-5,8,11,14,17-icosapentaenoate	(2R)-1-{[(2-Aminoethoxy)(hydroxy)phosphoryl]oxy}-3-hydroxy-2-propanyl (7Z,10Z,13Z,16Z)-7,10,13,16-docosatetraenoate	(2R)-1-{[(2-Aminoethoxy)(hydroxy)phosphoryl]oxy}-3-hydroxy-2-propanyl (7Z,10Z,13Z,16Z)-7,10,13,16-docosatetraenoate	(2R)-1-{[(2-Aminoethoxy)(hydroxy)phosphoryl]oxy}-3-hydroxy-2-propanyl (7Z,10Z,13Z,16Z)-7,10,13,16-docosatetraenoate	(2R)-1-{[(2-Aminoethoxy)(hydroxy)phosphoryl]oxy}-3-hydroxy-2-propanyl (9Z,12Z,15Z)-9,12,15-octadecatrienoate	(2R)-2,3-Dihydroxypropyl heptadecanoate	(2R)-3-{[(2-Aminoethoxy)(hydroxy)phosphoryl]oxy}-2-hydroxypropyl (9Z)-9-hexadecenoate	(2R)-3-Hydroxy-2-[(9Z,12E)-9,12-octadecadienoyloxy]propyl 2-(trimethylammonio)ethyl phosphate	(2R,3R)-2-(3,4-Dihydroxyphenyl)-5,7-dihydroxy-3,4-dihydro-2H-chromen-3-yl 4-hydroxybenzoate	(2R,3S)-3-Hydroxy-8-methyl-8-azabicyclo[3.2.1]octane-2-carboxylic acid	(2R,3S)-3-Hydroxy-8-methyl-8-azabicyclo[3.2.1]octane-2-carboxylic acid	(2S)-2-Amino-5-({(2R)-3-[(2-amino-2-carboxyethyl)disulfanyl]-1-[(carboxymethyl)amino]-1-oxo-2-propanyl}amino)-5-oxopentanoic acid (non-preferred name)	(2S)-6-Amino-2-[(E)-(hydroxymethylene)amino]hexanimidic acid	(2S,4aS,4bR,5R)-2-[(1E)-2-Carboxy-1-propen-1-yl]-7-{[(1S,4S)-3,3-dimethyl-2-oxo-7-oxabicyclo[2.2.1]hept-1-yl]methyl}-5-hydroxy-4,4a,4b-trimethyl-2,3,4,4a,4b,5,6,9a-octahydroindeno[2,1-b]pyran-8-carbox ylic acid	(2Z)-N-(3-Aminopropyl)-N-{4-[(3-aminopropyl)amino]butyl}-3-(4-hydroxy-3,5-dimethoxyphenyl)acrylamide	(3alpha,5beta,12beta,17xi)-12,24-Dihydroxy-24-oxocholan-3-yl D-glucopyranosiduronic acid	(3E)-4-(2,3,4-Trihydroxy-2,5,5,8a-tetramethyldecahydro-1-naphthalenyl)-3-buten-2-one	(3R)-3-[(9Z)-9-Octadecenoyloxy]-4-(trimethylammonio)butanoate	(3'S,5aR,6R,7S,9bR)-9b-[(1R)-2-Carboxy-1-hydroxyethyl]-7-[(S)-3-furyl(hydroxy)methyl]-3,3,5a,7-tetramethyl-5-oxodecahydro-3H-spiro[naphtho[1,2-c]furan-6,2'-oxirane]-3'-carboxylic acid	(3Z)-3-[Hydroxy(2-pyridinylamino)methylene]-2-methyl-2,3-dihydro-4H-thieno[2,3-e][1,2]thiazin-4-one 1,1-dioxide	(4beta,8alpha,9R)-6'-Methoxycinchonan-3,9-diol	(4E)-7-(4-Hydroxy-3,5-dimethoxyphenyl)-1-(4-hydroxy-3-methoxyphenyl)-4-hepten-3-one	(4E)-7-(4-Hydroxy-3,5-dimethoxyphenyl)-1-(4-hydroxy-3-methoxyphenyl)-4-hepten-3-one	(4-Isopropenylcyclohexyl)methyl (2E)-3-(3,4-dihydroxyphenyl)acrylate	(4R,8S)-11-[(2R)-6-Hydroxy-2,5,7,8-tetramethyl-3,4-dihydro-2H-chromen-2-yl]-4,8-dimethylundecanoic acid
					Compound #	X09148	X08651	X04769	X02653	X07958	X08046	X05189	X07283	X01318	X05375	X07776	X01146	X07792	X03603	X01210	X02646	X02092	X02190	X03679	X06649	X05316	X07232	X00797	X03533	X00503	X02647	X00069	X03315	X06152	X09406	X02677	X04939	X02374	X02540	X03014	X02505	X00286	X06538	X07354	X03644	X06890	X04856	X09224	X06842
MS-Omics_ID	Costumer_ID	Study Group			Unit	Area	Area	Area	Area	Area	Area	Area	Area	Area	Area	Area	Area	Area	Area	Area	Area	Area	Area	Area	Area	Area	Area	Area	Area	Area	Area	Area	Area	Area	Area	Area	Area	Area	Area	Area	Area	Area	Area	Area	Area	Area	Area	Area	Area
CS30423.	SUMJUV20_1	SummerJuveniles				250424	379256	1.85901e+06	2.10917e+07	1.02093e+06	1.22494e+06	5.52206e+06	304977	514116	3.80776e+06	1.12866e+06	2.05135e+07	1.13405e+06	1.53251e+06	2.89931e+07	1.49768e+06	6.30008e+06	9.02459e+06	1.0857e+06	1.08842e+06	891402	725798	6.79831e+07	2.22957e+06	1.04291e+08	3.75731e+06	1.59078e+09	345527	326667	43965.7	2.41731e+07	3.84248e+06	2.50728e+06	1.1804e+07	1.43476e+07	5.07707e+06	1.38066e+08	313274	122454	5.76351e+06	757684	4.66703e+06	806541	2.57118e+06
CS30424.	SUMJUV20_2	SummerJuveniles				304940	190869	1.8313e+06	1.2833e+07	1.00968e+06	2.01131e+06	4.61697e+06	157288	297951	463596	1.28992e+06	6.31188e+07	1.10894e+06	5.17925e+06	3.83318e+07	4.5516e+06	1.5133e+07	2.0449e+07	9.89734e+06	2.68172e+06	1.79434e+06	1.53971e+06	9.14427e+07	4.2582e+06	9.22989e+07	1.17459e+07	3.9257e+09	279780	204446	45227.6	2.19859e+07	2.23612e+06	4.09643e+06	8.33248e+06	7.78113e+06	1.03108e+07	4.19394e+08	423596	95582.5	5.21513e+06	1.0092e+06	6.30111e+06	791502	1.51495e+06
CS30425.	SUMJUV20_3	SummerJuveniles				1.11663e+06	112623	307355	8.88316e+06	436760	621364	2.21932e+06	302574	124224	394146	1.65558e+06	1.03326e+07	865558	2.87084e+06	2.53751e+07	1.09382e+07	1.55151e+07	1.07623e+07	384814	2.0193e+06	3.25951e+06	1.22349e+06	7.1192e+07	4.89901e+06	4.68138e+07	6.49032e+06	1.57245e+09	187562	217060	30872	1.39782e+07	860851	118902	3.02448e+06	5.91021e+06	4.83393e+06	1.23326e+08	229524	67685.5	4.30098e+06	1.20954e+06	2.59869e+06	407517	1.44752e+06
CS30426.	SUMJUV20_4	SummerJuveniles				1.13059e+06	252851	759438	1.57053e+07	1.04663e+06	1.18886e+06	3.98771e+06	176095	302202	445770	1.73648e+06	7.84559e+06	669434	3.01746e+06	2.60181e+07	6.81356e+06	1.01525e+07	1.55648e+07	660815	793855	1.87428e+06	652508	7.23738e+07	4.05271e+06	1.10848e+08	6.7156e+06	1.20475e+09	279872	403923	38644	1.8117e+07	2.85714e+06	185400	5.2284e+06	1.25989e+07	3.01943e+06	8.65791e+07	267699	86773.3	4.78962e+06	1.61384e+06	4.30282e+06	596965	2.80048e+06
CS30427.	SUMJUV20_5	SummerJuveniles				209721	89671.3	241643	7.17477e+06	424244	422968	2.69526e+06	76744.1	169703	323669	1.70894e+06	5.07924e+06	415964	2.93756e+06	1.85896e+07	9.67693e+06	8.32448e+06	1.31812e+07	1.07047e+06	1.3045e+06	2.26629e+06	469420	4.17898e+07	2.96706e+06	8.40601e+07	8.42409e+06	1.18451e+09	205037	133166	21222	1.08501e+07	1.11897e+06	279343	3.12255e+06	3.06129e+06	735849	3.54522e+07	301282	66993.1	3.03058e+06	810209	2.92317e+06	362017	1.8569e+06
CS30433.	FALLJUV20_1	FallJuveniles				605464	186339	2.84212e+06	1.18071e+07	1.75273e+06	1.45077e+06	5.91291e+06	545031	344199	685345	1.40019e+06	1.43252e+07	937084	1.38358e+06	2.09545e+06	561523	2.09419e+06	1.25334e+07	1.47382e+06	592638	302027	471007	2.35133e+07	1.25219e+06	4.58776e+07	2.5763e+06	4.97934e+08	455765	309001	107434	2.52858e+07	2.25675e+06	847878	2.50491e+07	1.77552e+07	2.42302e+06	1.08558e+08	208380	85010	664408	762652	1.15732e+06	539413	3.59671e+06
CS30434.	FALLJUV20_2	FallJuveniles				705300	92952.2	4.02284e+06	1.39139e+07	610085	467521	3.33163e+06	765579	515377	1.01518e+06	856069	7.27571e+06	1.34583e+06	1.43195e+06	8.0298e+06	1.35664e+06	2.43899e+06	1.17083e+07	914014	548532	882025	578790	5.66435e+07	2.45806e+06	4.72047e+07	3.63321e+06	1.13647e+09	204259	381411	60611.2	1.52831e+07	728683	650644	7.83255e+06	8.24331e+06	1.86809e+06	8.5556e+07	232511	97920.2	779764	2.68867e+06	1.37469e+06	341797	1.66165e+06
CS30435.	FALLJUV20_3	FallJuveniles				102230	129377	2.38083e+06	1.54096e+07	944057	712559	3.39607e+06	3.64015e+06	960058	347734	1.07256e+06	1.88795e+07	577304	1.36448e+06	3.38915e+07	1.52715e+06	7.77556e+06	4.60379e+06	409045	2.07889e+06	944479	1.84493e+06	9.3398e+07	5.21091e+06	6.47761e+07	3.88287e+06	8.2363e+08	261128	448323	72789.3	2.01402e+07	5.08216e+06	1.77441e+06	5.15108e+06	9.98515e+06	2.42358e+06	1.73733e+08	369737	90875.3	542451	1.47887e+06	1.6486e+06	470834	2.46529e+06
CS30436.	FALLJUV20_4	FallJuveniles				923810	43406.1	3.11833e+06	9.9279e+06	263037	920273	2.05011e+06	123225	145803	182560	1.05111e+06	1.24389e+07	885167	1.71373e+06	1.55736e+07	1.04128e+06	1.80246e+06	1.12752e+07	2.57679e+06	445025	577430	411802	4.55609e+07	1.28668e+06	5.56951e+07	4.06378e+06	2.44934e+09	161586	335971	16645.2	1.29185e+07	543426	316256	4.1523e+06	5.01357e+06	4.19071e+06	1.38462e+08	208674	69678.1	3.51494e+06	594014	3.22369e+06	245933	1.06801e+06
CS30437.	WINTERJUV21_1	WinterJuveniles				515672	70523.2	1.14129e+06	3.43006e+06	763000	523219	3.58865e+06	299991	143490	217576	1.08852e+06	1.20885e+06	2.05077e+06	91606.8	137000	90340	727064	452231	217365	386812	30916.1	43295.2	599314	404314	2.12461e+06	495678	1.78376e+06	255520	493199	35172.9	1.14668e+07	306669	95173.2	8.29366e+06	1.06888e+07	418088	1.31133e+06	189333	67051.1	142697	468883	246127	556732	1.44552e+06
CS30438.	WINTERJUV21_2	WinterJuveniles				455681	127828	6.35533e+06	9.98218e+06	2.37942e+06	314477	3.46679e+06	1.07435e+06	259535	669694	1.20423e+06	5.19632e+06	596727	6.2263e+06	1.42872e+07	1.88705e+06	2.65541e+06	1.38533e+07	2.53841e+06	195401	689060	194408	2.195e+07	3.06158e+06	8.00052e+07	1.00866e+07	1.27064e+09	282880	323454	466597	3.60626e+06	1.70585e+06	220779	4.6911e+06	9.08266e+06	432416	7.46211e+07	259622	100887	1.79605e+06	1.68637e+06	3.30453e+06	419992	2.26884e+06
CS30439.	WINTERJUV21_3	WinterJuveniles				73916.3	44253.5	1.86118e+06	8.23619e+06	828808	355560	1.53065e+06	40611.2	141812	1.15147e+06	1.30986e+06	3.97727e+06	497160	1.98419e+06	1.51679e+07	603123	2.06388e+06	8.09025e+06	549012	604624	445300	1.54085e+06	3.3884e+07	2.2576e+06	4.59011e+07	4.38431e+06	6.95985e+08	117731	228028	26327.5	5.2758e+06	1.22743e+06	98248.2	2.02739e+06	3.30959e+06	685723	3.64095e+07	149921	55425	785527	1.61057e+06	1.24138e+06	104293	1.22572e+06
CS30440.	WINTERJUV21_4	WinterJuveniles				73387.6	62999.9	1.14731e+06	1.06747e+07	488813	268493	1.8349e+06	46851.1	105005	262147	905423	2.36209e+06	510553	1.94241e+06	8.803e+06	2.08512e+06	2.08912e+06	9.58111e+06	204859	128389	615827	195596	2.3209e+07	1.46006e+06	4.12996e+07	3.26737e+06	1.29484e+09	116210	151719	40180.4	2.68187e+06	657810	340858	2.80883e+06	4.43761e+06	369871	3.42538e+07	106311	74850.4	927521	762418	1.31741e+06	207971	1.04732e+06
CS30441.	WINTERJUV21_5	WinterJuveniles				177875	23070.3	1.08034e+06	1.27129e+07	252149	233685	1.78542e+06	367354	97674	237436	839159	1.885e+06	858098	852459	4.22159e+06	620518	1.16336e+06	6.86033e+06	189671	119131	182940	151261	1.61614e+07	1.01144e+06	2.72977e+07	1.40413e+06	7.018e+08	121651	512169	14744.2	2.98361e+06	435787	236376	2.05488e+06	3.81243e+06	218210	2.68388e+07	81626.9	84178.9	1.89484e+06	1.9008e+06	1.47362e+06	178215	1.19861e+06
CS30442.	SPRINGAD21_1	SpringAdults				248587	73303	4.60989e+06	7.81177e+06	382549	426807	1.52539e+06	1.48669e+06	557636	648335	725580	5.6947e+06	779555	2.51494e+06	5.0593e+06	651593	3.0408e+06	1.03938e+07	1.35745e+06	335481	456488	328799	1.88501e+07	1.78629e+06	3.88585e+07	4.24163e+06	8.62145e+08	138761	180532	27989	9.27369e+06	905735	400695	2.02018e+06	4.86054e+06	891632	4.64454e+07	200248	72883.7	1.5289e+06	466622	1.09299e+06	229566	1.48591e+06
CS30443.	SPRINGAD21_2	SpringAdults				48052.3	58710.9	694422	5.7829e+06	537677	310684	1.9376e+06	543515	158709	292833	1.1575e+06	4.74989e+06	477238	1.40789e+06	6.7972e+06	995954	1.87268e+06	5.982e+06	538263	341288	422824	466896	2.09486e+07	1.33535e+06	4.19798e+07	2.50032e+06	4.01995e+08	147271	146287	420316	6.04356e+06	1.41468e+06	2.10944e+06	3.28901e+06	4.90005e+06	244705	4.24171e+07	168250	69978.9	662436	1.11192e+06	907059	200809	1.23979e+06
CS30444.	SPRINGAD21_3	SpringAdults				66484.3	69078.9	2.35153e+06	1.33905e+07	393818	532994	1.59724e+06	338978	99349.1	110587	865614	8.52584e+06	891256	2.56431e+06	2.1e+07	949599	5.43784e+06	9.10924e+06	661688	952227	867410	1.39615e+06	4.09579e+07	3.02851e+06	2.93642e+07	5.24015e+06	1.11283e+09	120698	553984	134991	5.13355e+06	1.34875e+06	2.45347e+06	2.63608e+06	4.53618e+06	1.04974e+06	7.60412e+07	145238	77525.4	3.61411e+06	488561	3.00885e+06	200472	1.10546e+06
CS32290.	SPRINGAD21_4	SpringAdults				396192	45533.8	2.41794e+06	8.58485e+06	453772	324208	1.89878e+06	140840	177598	2.5017e+06	1.11249e+06	3.45041e+06	680894	887728	7.50911e+06	868160	3.83764e+06	1.25748e+07	992570	412003	482838	479372	1.92121e+07	950386	3.79835e+07	2.48829e+06	8.91889e+08	127168	238946	89942.6	6.90057e+06	1.57056e+06	850068	2.46048e+06	5.00976e+06	840420	3.45104e+07	148218	55129.8	495733	721914	1.01355e+06	153684	1.46242e+06
CS32291.	SPRINGAD21_5	SpringAdults				297506	39534.9	4.5777e+06	1.14417e+07	311431	365321	1.805e+06	128098	162977	4.62462e+06	627999	3.32368e+06	872580	1.23684e+06	1.15908e+07	539207	1.57165e+06	5.45967e+06	343437	219523	275122	480480	2.30591e+07	873855	2.89538e+07	2.20122e+06	4.91068e+08	130047	141322	890280	4.521e+06	2.65368e+06	906118	2.46153e+06	4.54792e+06	186665	2.47777e+07	129969	74425.4	548468	324532	838689	141626	946639
CS32292.	SUMAD21_1	SummerAdults				538681	111123	570634	1.48367e+07	1.10615e+06	960579	2.5687e+06	341942	382930	358403	1.0382e+06	4.00047e+06	896330	841013	1.98937e+07	1.06455e+06	4.09174e+06	4.52136e+06	924320	472965	538399	425509	4.46145e+07	2.49819e+06	4.97078e+07	1.83151e+06	2.92595e+08	213093	755760	52786	7.4114e+06	1.87883e+06	1.1163e+06	5.04954e+06	7.84706e+06	593484	4.74988e+07	126357	106488	882464	1.49221e+06	1.23093e+06	155984	1.49865e+06
CS32293.	SUMAD21_2	SummerAdults				435089	82630	2.79971e+06	8.84343e+06	181046	363384	1.62278e+06	286697	105037	270139	1.15933e+06	2.08154e+06	712472	1.18754e+06	3.75993e+07	993548	9.91286e+06	3.18299e+06	261378	1.3477e+06	879329	500570	5.76819e+07	4.75335e+06	3.03414e+07	3.05043e+06	4.09921e+08	107288	509657	19710.8	3.04744e+06	1.00252e+06	131136	2.69224e+06	5.12267e+06	2.16325e+06	2.62101e+07	159457	66549.4	539512	672028	857140	175061	917453
CS32294.	SUMAD21_3	SummerAdults				92341.2	60057.5	969559	5.52921e+06	209563	839802	1.96969e+06	486394	134198	172724	843306	1.22908e+07	827781	3.36923e+06	2.49357e+07	3.06287e+06	8.65827e+06	1.76704e+07	993885	1.10681e+06	1.42751e+06	670318	4.43081e+07	2.46846e+06	1.3919e+08	7.01494e+06	2.13033e+09	139716	127381	19331.9	5.85365e+06	1.15526e+06	1.73464e+06	2.85388e+06	1.87794e+06	2.10965e+06	1.97691e+08	170578	62502	3.77174e+06	454985	3.09237e+06	360349	481840
CS32295.	SUMAD21_4	SummerAdults				551329	75306.5	515750	1.03442e+07	486618	408185	2.16384e+06	174856	240987	296038	1.45209e+06	8.27715e+06	736293	721036	2.01312e+07	1.42668e+06	3.77595e+06	4.26142e+06	177133	680283	621529	712724	4.64544e+07	2.67712e+06	6.50905e+07	1.55949e+06	7.44183e+08	174937	89541.3	27652.9	1.39274e+06	831070	4.34029e+06	2.68383e+06	4.54607e+06	637020	8.42331e+07	107959	84311.1	600862	565345	1.33414e+06	194364	955024
CS32591.	SUMAD21_5	SummerAdults				79872.2	65536.2	555046	1.06613e+07	399357	442579	1.69824e+06	179486	233525	401970	1.37987e+06	1.62978e+06	328110	679222	7.61056e+06	661108	1.85118e+06	5.47123e+06	274220	317667	195772	275959	2.08334e+07	773754	7.50604e+07	1.33099e+06	4.72321e+08	171045	351611	19262.8	4.03644e+06	914700	523841	1.3849e+06	4.44693e+06	2.78395e+06	2.08373e+07	86353.8	84084.7	426989	3.24121e+06	843377	237603	1.00461e+06
[truncated: 544 more columns]

## Sheet: Annotation level 2b (raw)
					DP	3.72275	1.65292	13.0465	1.96584	6.48189	10.9844	2.62891	2.12865	3.56459	14.0265	3.46661	2.03721	4.25787	7.92561	10.2964	3.27274	2.49697	2.73852	5.53029	3.37708	17.2759	3.40896	2.50896	1.26193	8.36181	8.18725	38.0907	13.9956	7.40973	14.6678	3.44692	3.30476	1.44355	16.3232	4.76901	8.77516	15.5661	4.71879	14.7921	4.79873	39.4713	4.86501	13.9425	4.36719
					Relative precision (%)	15.5777	16.4048	4.44195	12.37	14.1173	7.47596	19.2742	16.8297	13.8887	11.5151	14.2313	19.3449	8.3064	6.74207	11.6671	7.86882	13.5498	19.7499	12.9516	11.3708	2.79898	9.43426	10.5914	17.6265	4.25304	12.4435	4.40053	8.71568	6.02769	9.87462	13.8105	13.0811	15.1658	6.98023	15.45	12.4817	7.93414	11.651	12.1615	9.7613	10.7909	15.4512	8.34011	13.2445
					LOD	22236.9	564592	2572.59	32957.1	109271	46201.6	14706.2	5.04316e+06	134326	118849	17384.4	165967	5165.32	6314.49	7524.77	2125.4	61957.8	422208	149048	362302	49852.8	249871	12400.1	80722.1	145371	14293.4	4.15856e+06	63239.2	54065.6	6.31894e+06	34805.5	149192	31705.1	128983	156452	656655	407581	295616	265803	86059.7	11205.9	218079	172855	2.88429e+06
					RT [min]	9.459	8.533	1.126	6.221	11.283	2.803	6.598	10.54	10.969	7.842	5.347	5.27	5.255	5.041	6.47	1.257	5.48	9.711	7.857	4.427	7.977	6.831	6.226	6.216	7.148	5.344	5.583	5.578	5.139	5.728	5.168	5.032	6.215	6.49	8.808	8.42	7.844	2.355	3.428	9.257	7.091	11.606	7.883	5.809
					Molecular Weight	244.204	326.246	74.0845	159.069	354.277	149.07	262.095	302.246	328.261	134.073	190.074	123.068	243.07	299.1	279.147	367.123	154.111	405.113	282.09	109.053	188.141	136.052	156.069	117.058	145.053	150.068	99.0684	167.095	152.059	216.102	150.054	123.068	143.074	145.053	294.219	294.22	120.057	159.126	159.126	467.301	327.22	283.324	346.214	86.0368
					Formula	C14 H28 O3	C19 H34 O4	C3 H10 N2	C10 H9 N O	C21 H38 O4	C6 H7 N5	C13 H14 N2 O4	C17 H34 O4	C19 H36 O4	C9 H10 O	C10 H10 N2 O2	C7 H9 N O	C14 H10 F N O2	C12 H12 F3 N5 O	C16 H17 N5	C18 H23 Cl2 N3 O	C8 H14 N2 O	C20 H18 F3 N3 O S	C17 H14 O4	C6 H7 N O	C10 H20 O3	C8 H8 O2	C10 H8 N2	C8 H7 N	C9 H7 N O	C9 H10 O2	C5 H9 N O	C9 H13 N O2	C7 H8 N2 O2	C11 H12 N4 O	C6 H6 N4 O	C7 H9 N O	C10 H9 N	C9 H7 N O	C18 H30 O3	C18 H30 O3	C8 H8 O	C8 H17 N O2	C8 H17 N O2	C29 H41 N O4	C21 H29 N O2	C19 H41 N	C21 H30 O4	C4 H6 O2
					Annotation level	2b	2b	2b	2b	2b	2b	2b	2b	2b	2b	2b	2b	2b	2b	2b	2b	2b	2b	2b	2b	2b	2b	2b	2b	2b	2b	2b	2b	2b	2b	2b	2b	2b	2b	2b	2b	2b	2b	2b	2b	2b	2b	2b	2b
					Name	(R)-3-Hydroxy myristic acid	1,2-dihydroxyheptadec-16-yn-4-yl acetate	1,3-Diaminopropane	1H-indene-3-carboxamide	1-Linoleoyl glycerol	1-Methyladenine	2-(acetylamino)-3-[4-(acetylamino)phenyl]acrylic acid	2,3-dihydroxypropyl 12-methyltridecanoate	2,4-dihydroxyheptadec-16-en-1-yl acetate	2,4-Dimethylbenzaldehyde	2-[(1S)-1-Hydroxyethyl]-4(1H)-quinazolinone	2-Anisidine	2-Fluoro-6-(4-methoxyphenoxy)benzonitrile	3-(2,7-dimethylpyrazolo[1,5-a]pyrimidin-6-yl)-5-(trifluoromethyl)-4,5-dihydro-1H-pyrazol-5-ol	3-(4-benzylpiperazino)pyrazine-2-carbonitrile	3-(tert-Butyl)-1-(2,4-dichlorobenzyl)-N-isopropyl-1H-pyrazole-5-carboxamide	3-(tert-butyl)-1-methyl-4,5-dihydro-1H-pyrazol-5-one	3-[2-morpholino-5-(trifluoromethyl)phenyl]-4-phenyl-2,3-dihydro-1,3-thiazol-2-imine hydrochloride	3-benzyl-4-hydroxy-5-(4-hydroxyphenyl)-2,5-dihydrofuran-2-one	3-Hydroxy-2-methylpyridine	3-Hydroxydecanoic acid	3-Methoxybenzaldehyde	4,4'-Bipyridine	4-Ethynylaniline	4-Indolecarbaldehyde	4'-Methoxyacetophenone	4-Piperidone	5-acetyl-2,6-dimethyl-1,2,3,4-tetrahydropyridin-4-one	5-Nitro-o-toluidine	6-(4-methoxyphenyl)pyrimidine-2,4-diamine	6-Methyl[1,2,4]triazolo[4,3-b]pyridazin-8-ol	6-Methyl-2-pyridinemethanol	6-Methylquinoline	8-Hydroxyquinoline	9-Oxo-10(E),12(E)-octadecadienoic acid	9-Oxo-ODE	Acetophenone	Acetyl-β-methylcholine	Acetyl-β-methylcholine	Buprenorphine	Butorphanol	Cetrimonium	Corticosterone	Crotonic acid
					Compound #	X07092	X03728	X02873	X02406	X00487	X01949	X03458	X00122	X02182	X03266	X06789	X06567	X07805	X05099	X03950	X07978	X06509	X03573	X06381	X06444	X03080	X02850	X02842	X00483	X01492	X05294	X00639	X03635	X00843	X00199	X02989	X06802	X01288	X00558	X04314	X02523	X02950	X00460	X02165	X04160	X00064	X02801	X02263	X02314
MS-Omics_ID	Costumer_ID	Study Group			Unit	Area	Area	Area	Area	Area	Area	Area	Area	Area	Area	Area	Area	Area	Area	Area	Area	Area	Area	Area	Area	Area	Area	Area	Area	Area	Area	Area	Area	Area	Area	Area	Area	Area	Area	Area	Area	Area	Area	Area	Area	Area	Area	Area	Area
CS30423.	SUMJUV20_1	SummerJuveniles				729394	1.37496e+06	1.92138e+06	2.32238e+06	5.97766e+07	4.23111e+06	1.90308e+06	2.4189e+08	6.5398e+06	545440	265964	1.34968e+06	559000	2.51573e+06	1.12818e+06	41556.2	1.1737e+06	443579	393795	1.01069e+06	4.6361e+06	5.40424e+06	1.98031e+06	1.11447e+07	2.34445e+06	538771	5.44163e+06	369478	2.6363e+07	1.29013e+08	4.6129e+06	1.06148e+06	2.27771e+06	8.24261e+07	2.32385e+06	3.95555e+06	2.05714e+06	5.1214e+07	1.19334e+07	2.54876e+06	229213	2.9782e+06	1.56202e+06	4.68196e+06
CS30424.	SUMJUV20_2	SummerJuveniles				1.06141e+06	1.1427e+06	1.72649e+06	1.94867e+06	5.75517e+07	6.76271e+06	1.23326e+06	2.15971e+08	3.52652e+06	1.66571e+06	471452	1.11341e+06	827836	1.50658e+06	1.27547e+06	45966.8	722553	832155	388646	524894	6.25818e+06	3.1227e+06	2.11101e+06	1.07348e+07	2.97403e+06	593364	9.6457e+06	1.03543e+06	3.13974e+07	1.40036e+08	5.2294e+06	751361	2.3351e+06	2.89197e+07	2.69244e+06	4.83312e+06	2.30705e+06	3.26708e+07	1.48252e+07	4.14028e+06	158251	2.10367e+06	1.23993e+06	3.01877e+06
CS30425.	SUMJUV20_3	SummerJuveniles				493835	732034	2.54763e+06	3.1271e+06	2.6144e+07	3.51855e+06	2.30015e+06	1.71433e+08	3.44228e+06	2.86699e+06	820597	1.46471e+06	937172	1.59127e+06	3.18391e+06	42478.7	1.1219e+06	2.14777e+06	409042	1.31605e+06	2.39859e+06	5.29129e+06	3.09448e+06	1.87737e+07	5.41776e+06	1.22969e+06	5.07413e+06	1.67267e+06	1.85995e+07	3.99552e+07	821755	1.18061e+06	4.20918e+06	3.94963e+07	1.09633e+06	1.80147e+06	3.65938e+06	3.17509e+07	5.28904e+06	2.8943e+06	174185	3.09701e+06	4.26904e+06	4.78257e+06
CS30426.	SUMJUV20_4	SummerJuveniles				492601	1.65509e+06	3.41318e+06	2.96189e+06	2.20435e+07	9.50419e+06	2.22906e+06	2.31624e+08	2.65637e+06	2.15598e+06	815051	1.34615e+06	694806	1.44196e+06	3.26509e+06	46029.4	1.02841e+06	855120	391357	1.06724e+06	3.48113e+06	4.5992e+06	2.60323e+06	1.57992e+07	7.37766e+06	3.17865e+06	2.10854e+07	6.06791e+06	1.70293e+07	5.28829e+07	6.20454e+06	1.05786e+06	3.38395e+06	6.74931e+07	967798	3.39263e+06	5.29262e+06	2.6504e+07	7.65996e+06	2.45982e+06	175302	4.10804e+06	2.36631e+06	6.47191e+06
CS30427.	SUMJUV20_5	SummerJuveniles				332254	1.29376e+06	1.56106e+06	2.21539e+06	1.88549e+07	5.55016e+06	2.25829e+06	2.98327e+08	2.7545e+06	667654	634037	1.42351e+06	970946	1.82195e+06	1.59863e+06	36227.8	1.21128e+06	1.45929e+06	437732	1.08521e+06	2.94037e+06	5.38344e+06	2.21966e+06	1.21544e+07	2.35585e+06	1.07748e+06	8.10081e+06	1.90329e+06	1.63689e+07	4.53462e+07	5.1215e+06	1.21799e+06	2.84429e+06	9.2605e+07	1.05848e+06	2.25717e+06	950725	2.04958e+07	6.78699e+06	1.99383e+06	195995	3.76294e+06	3.87863e+06	7.13656e+06
CS30433.	FALLJUV20_1	FallJuveniles				495108	1.7406e+06	2.40756e+06	2.99666e+06	1.73328e+07	1.28799e+07	1.97958e+06	1.54598e+08	4.31712e+06	2.04413e+06	865738	2.57458e+06	889631	1.07898e+06	1.14321e+06	47039.5	2.18129e+06	516894	313856	2.14898e+06	3.3963e+06	8.10801e+06	2.55075e+06	1.5767e+07	3.26135e+06	259681	7.4678e+06	393952	4.632e+07	3.45019e+08	5.51109e+06	2.11959e+06	3.59915e+06	6.21936e+06	3.38201e+06	6.06381e+06	4.16392e+06	8.67597e+07	2.50826e+06	498142	2.49932e+09	1.79379e+06	5.87972e+06	1.29879e+07
CS30434.	FALLJUV20_2	FallJuveniles				628563	740144	1.34502e+06	2.98898e+06	1.16198e+07	5.28544e+06	821126	1.26621e+08	2.63876e+06	3.01637e+06	1.04668e+06	918671	555877	740433	768728	40450.3	729638	734434	323488	695629	3.03212e+06	3.91838e+06	2.27216e+06	1.44336e+07	4.10135e+06	255342	4.40427e+06	553497	1.93743e+07	1.69005e+08	4.10812e+06	745118	2.93214e+06	6.63094e+06	683087	999048	4.73453e+06	5.25392e+07	180469	1.30549e+06	8.16469e+08	1.39122e+06	1.04201e+07	3.34344e+06
CS30435.	FALLJUV20_3	FallJuveniles				236174	1.15875e+06	854257	2.24724e+06	1.59163e+07	5.13559e+06	443702	1.81608e+08	2.78228e+06	605470	1.71547e+06	1.25914e+06	598603	880042	815195	41712.1	886577	1.01473e+06	303593	974722	1.8767e+06	4.88456e+06	2.19062e+06	1.29035e+07	2.88589e+06	515974	4.83812e+06	1.07465e+06	4.99682e+07	2.47744e+08	2.39658e+06	1.19507e+06	2.65026e+06	6.04069e+06	1.78909e+06	2.7948e+06	1.45137e+06	2.40864e+07	1.04685e+06	1.96147e+06	2.40691e+08	3.40911e+06	6.2233e+06	6.559e+06
CS30436.	FALLJUV20_4	FallJuveniles				667637	1.1731e+06	3.86848e+06	3.89307e+06	3.29754e+07	9.32178e+06	1.41916e+06	2.07675e+08	1.70947e+06	572208	722526	1.08612e+06	916798	967057	1.25648e+06	40984.2	786680	1.09334e+06	338953	847871	3.57054e+06	3.97858e+06	3.31158e+06	2.05616e+07	7.37598e+06	314126	6.41145e+06	533451	4.80937e+07	6.46146e+07	4.52507e+06	882721	4.38414e+06	9.77862e+06	404087	1.29249e+06	1.72173e+06	6.53899e+07	408162	2.78627e+06	1.77774e+09	1.68493e+06	1.03555e+06	4.3235e+06
CS30437.	WINTERJUV21_1	WinterJuveniles				165333	305400	2.84677e+06	1.70221e+06	2.88291e+06	5.48647e+06	736623	3.62615e+07	1.3326e+06	412220	54508	1.3452e+06	922375	716186	579068	33568.9	934356	250170	287683	1.1086e+06	959208	5.0624e+06	1.60323e+06	8.63437e+06	4.28664e+06	343053	7.91623e+06	731805	1.51331e+07	1.49212e+08	1.69184e+06	1.11208e+06	1.84695e+06	4.63552e+06	2.87632e+06	2.47011e+06	1.32244e+06	1.67627e+07	1.67198e+06	62888.6	159417	93001.6	3.16977e+06	5.00568e+06
CS30438.	WINTERJUV21_2	WinterJuveniles				273768	1.67359e+06	2.37055e+06	2.67593e+06	1.63257e+07	8.08215e+06	1.64626e+06	1.53528e+08	2.75018e+06	1.31407e+06	833897	1.54675e+06	456369	660701	1.31373e+06	38269.2	960882	667436	405604	1.17572e+06	2.66598e+06	3.99352e+06	2.5248e+06	1.48027e+07	5.68023e+06	787227	7.52823e+07	1.36289e+06	1.97556e+07	6.90808e+07	5.45293e+06	1.22407e+06	3.65817e+06	6.21774e+06	421027	1.82339e+06	2.39096e+06	1.54125e+07	4.80203e+06	1.29506e+06	145334	3.88489e+06	8.97578e+06	5.95389e+06
CS30439.	WINTERJUV21_3	WinterJuveniles				334501	1.49828e+06	3.99345e+06	2.3702e+06	9.29726e+06	4.19955e+06	1.52999e+06	1.87392e+08	2.68388e+06	843569	909349	1.56886e+06	420339	892270	951432	43981.7	1.19143e+06	757831	1.49063e+06	1.22303e+06	3.02683e+06	5.96447e+06	2.55342e+06	1.42156e+07	7.63866e+06	540760	6.0211e+06	1.30895e+06	2.05702e+07	9.7652e+07	3.59626e+06	1.21099e+06	3.29605e+06	2.74298e+06	840898	2.53861e+06	1.87853e+06	2.58342e+07	3.40933e+06	1.39292e+06	76830	2.72913e+06	6.10988e+06	6.05413e+06
CS30440.	WINTERJUV21_4	WinterJuveniles				262455	1.31619e+06	1.62554e+06	2.64255e+06	1.67028e+07	1.20401e+06	1.28311e+06	1.66638e+08	2.03441e+06	912730	972462	909332	98097.1	809666	500243	39288.6	813154	714032	211122	632048	1.99803e+06	3.83515e+06	2.29261e+06	1.49312e+07	1.07869e+07	1.7308e+06	5.94783e+06	3.77229e+06	1.9073e+07	9.06182e+07	4.47055e+06	765127	3.34457e+06	4.79707e+06	651479	2.00432e+06	1.39625e+06	1.36286e+07	1.95416e+06	1.56699e+06	87033.7	2.10063e+06	5.34064e+06	3.69794e+06
CS30441.	WINTERJUV21_5	WinterJuveniles				409311	852466	1.10475e+06	1.81405e+06	7.22034e+06	1.52011e+06	462517	1.11889e+08	1.36027e+06	1.24851e+06	1.20921e+06	931558	231656	589545	348451	38168.8	786670	561489	262226	893829	2.76634e+06	4.50444e+06	1.58357e+06	8.96378e+06	5.27295e+06	1.11241e+06	3.43375e+06	2.09611e+06	2.77569e+07	4.73425e+07	2.93048e+06	713377	1.73395e+06	4.5689e+06	433827	1.92516e+06	3.29444e+06	7.71078e+06	1.21156e+06	851472	101195	1.5254e+06	7.43461e+06	4.12976e+06
CS30442.	SPRINGAD21_1	SpringAdults				245497	720489	2.38668e+06	2.73896e+06	1.29593e+07	1.02859e+07	1.57664e+06	1.35762e+08	4.16263e+06	340462	482199	1.25863e+06	554828	826378	3.76469e+06	36567.7	834235	597201	316614	1.01213e+06	2.55935e+06	3.94116e+06	2.10788e+06	1.24915e+07	3.53632e+06	466431	8.42631e+06	797489	2.90368e+07	2.01032e+08	7.15254e+06	965908	2.84905e+06	1.97013e+07	818247	1.68184e+06	511688	3.39967e+07	3.30927e+06	1.09771e+06	106878	2.37889e+06	3.06183e+06	5.0794e+06
CS30443.	SPRINGAD21_2	SpringAdults				287864	1.37433e+06	2.13676e+06	2.2817e+06	1.475e+07	5.07304e+06	3.33431e+06	1.68171e+08	3.2329e+06	315132	472836	1.39901e+06	451421	1.76558e+06	952065	38076.5	1.01279e+06	769242	247902	1.07334e+06	3.22972e+06	4.31564e+06	2.11292e+06	1.25547e+07	4.32959e+06	347254	6.52842e+06	586321	5.08368e+07	9.29806e+07	3.83574e+06	964297	2.85609e+06	1.0682e+07	634807	1.87936e+06	1.24049e+06	9.35498e+07	1.02227e+06	1.3182e+06	106757	2.26683e+06	7.30603e+06	3.69629e+06
CS30444.	SPRINGAD21_3	SpringAdults				431887	814517	1.58211e+06	1.81453e+06	2.38033e+07	7.24092e+06	1.06858e+06	1.74522e+08	3.8119e+06	258657	462060	874459	642610	1.49775e+06	463822	36490.5	685380	888331	271321	568824	4.52338e+06	3.25124e+06	1.68051e+06	8.70167e+06	3.6163e+06	125554	3.98027e+06	248652	3.53639e+07	6.90415e+07	6.26808e+06	665046	1.85468e+06	8.46634e+06	809943	1.67269e+06	739612	3.27533e+07	352461	1.53046e+06	91820.4	2.89211e+06	2.92805e+06	4.58745e+06
CS32290.	SPRINGAD21_4	SpringAdults				86973.1	1.36333e+06	6.90901e+06	2.3657e+06	1.09627e+07	1.09741e+07	4.78962e+06	1.41353e+08	3.69121e+06	1.10696e+06	1.10986e+06	1.14059e+06	362233	837405	747084	35801.9	975210	832469	270040	867126	1.2585e+06	4.43699e+06	2.26318e+06	1.29187e+07	4.67581e+06	925960	6.98169e+07	1.72242e+06	3.60919e+07	9.63626e+07	5.73555e+06	898129	3.29828e+06	2.4099e+07	403800	1.55807e+06	3.547e+06	2.36401e+07	2.37136e+06	1.40169e+06	101608	2.89348e+06	757700	4.87381e+06
CS32291.	SPRINGAD21_5	SpringAdults				181686	1.14225e+06	8.01464e+06	2.494e+06	7.81504e+06	9.08696e+06	4.01828e+06	1.29395e+08	2.43806e+06	186279	670440	695322	432152	1.68922e+06	1.01222e+06	42659.8	672423	567196	236489	845336	1.88182e+06	2.91622e+06	2.21079e+06	1.27286e+07	7.33832e+06	528763	9.74648e+06	797228	2.51854e+07	7.18033e+07	6.95074e+06	615408	2.66415e+06	2.11269e+07	298490	1.12965e+06	679525	8.9823e+07	2.78999e+06	815499	105742	2.01491e+06	683645	3.52978e+06
CS32292.	SUMAD21_1	SummerAdults				347272	2.28241e+06	657952	2.97427e+06	1.77894e+07	4.24174e+06	2.75232e+06	1.84556e+08	3.29946e+06	3.73882e+06	1.46583e+06	1.22565e+06	369578	2.63441e+06	726547	43848.9	1.02925e+06	874856	265141	986569	2.29699e+06	4.98007e+06	2.7403e+06	1.72219e+07	5.70857e+06	498736	1.2038e+07	1.03669e+06	4.85884e+07	1.52348e+08	3.33545e+06	1.02483e+06	3.92939e+06	1.82972e+07	2.26261e+06	7.32561e+06	5.42006e+06	6.79091e+07	1.90713e+06	963608	143414	2.10741e+06	445646	4.7129e+06
CS32293.	SUMAD21_2	SummerAdults				239417	919019	1.32636e+06	3.20307e+06	1.57002e+07	4.75546e+06	2.67189e+06	1.38562e+08	3.9394e+06	696698	820360	1.07641e+06	352723	2.97416e+06	782882	38789.9	955140	718203	252827	896976	2.2815e+06	4.4039e+06	2.82015e+06	1.71505e+07	1.15904e+07	180714	1.15305e+07	289263	4.2655e+07	6.672e+07	5.6882e+06	929328	3.83858e+06	2.60363e+07	361700	1.58694e+06	2.17866e+06	1.17198e+08	1.71205e+06	1.61493e+06	81251.9	1.90149e+06	3.47425e+06	3.56235e+06
CS32294.	SUMAD21_3	SummerAdults				711587	1.79488e+06	2.07588e+06	2.58565e+06	6.9655e+07	4.82228e+06	6.19922e+06	4.19112e+08	7.01915e+06	268167	757524	998254	508345	2.01039e+06	1.41163e+06	50302.2	840206	2.08611e+06	355244	655644	6.95649e+06	4.47752e+06	646690	1.44364e+07	6.99472e+06	359328	1.1612e+07	518386	1.24045e+07	7.79736e+07	4.48713e+06	915541	2.99296e+06	2.09265e+07	2.4848e+06	3.34274e+06	488930	2.73804e+07	1.84862e+06	3.13272e+06	115287	6.95718e+06	3.54231e+06	2.99605e+06
CS32295.	SUMAD21_4	SummerAdults				517824	1.3416e+06	36772.8	2.35114e+06	3.08585e+07	2.16553e+06	435432	2.44119e+08	2.58151e+06	653887	1.4566e+06	1.40136e+06	163378	2.32172e+06	504788	39883.4	990130	1.14331e+06	313111	966167	6.06262e+06	1.86655e+06	2.11185e+06	1.26878e+07	1.04267e+07	1.11435e+06	5.0882e+06	2.38499e+06	3.98701e+07	7.17794e+07	2.34968e+06	1.02749e+06	2.80342e+06	1.72033e+07	1.22168e+06	1.58103e+06	788306	4.0104e+07	1.19318e+06	1.76081e+06	148180	2.35881e+06	452537	2.29979e+06
CS32591.	SUMAD21_5	SummerAdults				386338	2.42775e+06	3.96071e+06	1.90148e+06	8.50814e+06	3.36385e+06	1.87634e+06	2.16705e+08	2.40292e+06	1.35505e+06	1.59698e+06	1.33277e+06	452584	1.1551e+06	1.28284e+06	38196.4	1.12537e+06	971655	244944	1.08391e+06	4.25172e+06	4.52166e+06	1.86943e+06	1.11517e+07	5.1564e+06	600631	4.27277e+07	790515	2.6326e+07	7.21131e+07	2.52683e+06	1.1428e+06	2.74521e+06	7.88654e+06	811334	3.0582e+06	4.10354e+06	2.36913e+07	1.97394e+06	903702	123601	5.22302e+06	334015	3.82919e+06
[truncated: 58 more columns]

## Sheet: Annotation level 2a (raw)
					DP	15.3072	12.6398	60.4153	20.4424	41.9411	25.6229	17.1491	5.32622	7.37938	17.2641	30.2077	23.1075	5.57828	71.6555	10.9017	10.2612	4.02869	7.04056	11.7934	12.1207	6.64604	12.3612	26.587	5.72961	10.3233	10.0089	62.9943	31.3703	4.71105	6.90634	6.65291	11.2068	3.16025	33.2165	30.989	15.2762	42.4417	8.83977	21.7444	4.6619	5.38656	47.1082	6.99007	5.60954
					Relative precision (%)	19.8621	5.4675	2.32946	8.79563	3.21982	2.30235	2.62068	9.94238	7.03734	4.00322	4.51464	2.85065	13.4937	2.30822	8.01345	3.79863	8.372	7.83962	5.76112	14.6099	14.9437	5.6661	2.26898	13.3999	3.36069	15.8519	1.91128	5.90103	19.0465	14.0801	3.86151	7.10621	17.1426	3.02877	2.84594	4.1206	3.40152	9.85208	3.63302	15.2371	14.0424	4.28102	13.9988	9.81899
					LOD	115004	5499.43	3676.16	42016.5	46855.4	1.01917e+06	481491	238485	48432.8	5094.78	8145.8	71999.3	740020	92699.6	16141.2	11682.6	341876	820042	126522	8159.28	4476.44	92682.7	36454.9	412645	114318	43541.1	5570.79	4563.27	242647	210269	4661.65	5409.01	5306.03	5407.56	8807.88	1070.2	6613.07	7346.13	3110.57	164208	5564.14	4002.4	24311.4	181837
					RT [min]	9.45	1.58	5.01	7.65	6	4.55	6.95	7.653	6.87	1.89	5.578	4.66	5.985	6.71	5.984	7.02	2.204	6.792	6.14	6.358	5.008	2.007	6.22	2.043	1.274	11.883	4	1.41	6.949	13.14	1.25	1.37	1.58	1.59	1.58	1.25	3.44	5.27	1.58	12.947	14.09	1.34	11.723	2.227
					Molecular Weight	320.235	161.069	228.075	210.093	118.063	104.047	132.079	160.11	152.047	146.022	215.035	104.047	130.063	160.074	144.042	166.063	132.054	122.037	130.063	191.058	220.085	125.059	118.063	145.11	89.0477	278.225	347.063	240.122	137.048	304.24	132.053	226.107	174.016	131.069	113.059	240.024	243.086	252.086	190.095	328.24	330.255	182.079	302.225	183.09
					Formula	C20 H32 O3							C8 H16 O3			C9 H10 Cl N O3		C6 H10 O3		C6 H8 O4		C4 H8 N2 O3	C7 H6 O2		C10 H9 N O3	C11 H12 N2 O3	C5 H7 N3 O		C7 H15 N O2	C3 H7 N O2	C18 H30 O2			C7 H7 N O2	C20 H32 O2								C10 H12 N4 O4		C22 H32 O2			C20 H30 O2	C9 H13 N O3
					Annotation level	2a	2a	2a	2a	2a	2a	2a	2a	2a	2a	2a	2a	2a	2a	2a	2a	2a	2a	2a	2a	2a	2a	2a	2a	2a	2a	2a	2a	2a	2a	2a	2a	2a	2a	2a	2a	2a	2a	2a	2a	2a	2a	2a	2a
					Name	12(S)-HETE	2-Aminoadipic acid	2'-Deoxyuridine	2-Ethylhexyl sulfate	2-Ethylhydracrylic/2-(hydroxymethyl)butanoi acid	2-Hydroxybutyric acid	2-Hydroxyisocaproic acid	2-Hydroxyoctanoic acid	2-Hydroxyphenylacetic acid	2-Oxoglutaric acid	3-Chloro-Tyrosine	3-Hydroxybutyric acid	3-Methyl-2-oxovaleric acid	3-Methyladipic/pimelic acid	3-Methylglutaconic acid	3-Phenyllactic acid	3-Ureidopropionic acid	4-Hydroxybenzaldehyde	4-Methyl-2-oxovaleric acid	5-Hydroxyindole-3-acetic acid	5-Hydroxytryptophan	5-Methylcytosine	8-Aminooctanoic acid	Acetylcholine	Alanine	alpha-Linolenic acid	AMP	Anserine	Anthranilic acid	Arachidonic acid	Asparagine	Carnosine	cis-Aconitic acid	Creatine	Creatinine	Cystine	Cytidine	Deoxyinosine	Diaminopimelic acid	Docosahexanoic acid	Docosapentaenoic acid	Dulcitol/Mannitol/Sorbitol	Eicosapentaenoic acid	Epinephrine
					Compound #	X01076	SL00197	SL00006	SL00007	SL00008	SL00201	SL00202	X06136	SL00012	SL00014	X09071	SL00212	X03089	SL00022	X09507	SL00024	X01730	X00716	SL00221	X07855	X08192	X07077	SL00031	X02372	X00828	X01778	SL00041	SL00042	X06350	X00311	SL00239	SL00242	SL00053	SL00249	SL00058	SL00251	SL00060	X05033	SL00061	X00253	SL00255	SL00065	X01684	X01540
MS-Omics_ID	Costumer_ID	Study Group			Unit	Area	Area	Area	Area	Area	Area	Area	Area	Area	Area	Area	Area	Area	Area	Area	Area	Area	Area	Area	Area	Area	Area	Area	Area	Area	Area	Area	Area	Area	Area	Area	Area	Area	Area	Area	Area	Area	Area	Area	Area	Area	Area	Area	Area
CS30423.	SUMJUV20_1	SummerJuveniles				7.33255e+06	265679	589699	2.43088e+06	4.99268e+06	4.41158e+06	2.81461e+06	1.01751e+06	362017	1.84769e+06	15445.4	1.7378e+07	4.61717e+06	3.73945e+06	134994	124781	8.90982e+06	1.03987e+07	6.03598e+06	144125	223558	337842	1.36387e+07	974586	1.79077e+07	1.038e+07	2.41572e+06	856.872	1.1912e+06	9.48751e+07	1.49712e+06	339169	4.96501e+06	7.66799e+06	309342	119243	1.67782e+06	864237	121514	1.59671e+08	541694	4.96421e+06	8.33116e+06	1.21054e+07
CS30424.	SUMJUV20_2	SummerJuveniles				2.27278e+07	170178	801107	317434	4.52165e+06	2.5197e+06	2.09725e+06	926827	212377	1.68264e+06	10654	7.31926e+06	4.12281e+06	1.93949e+06	140124	141251	9.24195e+06	2.36113e+07	3.95896e+06	430434	73136	746533	1.14295e+07	871975	2.47877e+07	1.13076e+07	2.87935e+06	1186.76	484994	1.4181e+08	1.44438e+06	139092	4.34471e+06	6.67955e+06	338036	29888.8	181480	3.00756e+06	221087	1.23537e+08	291888	1.31913e+06	1.31448e+07	5.49633e+06
CS30425.	SUMJUV20_3	SummerJuveniles				1.58355e+06	184155	326648	522182	401240	1.47932e+06	1.60152e+06	529474	257144	1.18634e+06	61524.6	5.86116e+06	2.39735e+06	859955	247061	147477	7.55924e+06	3.87417e+06	4.03947e+06	134925	93476.2	46567.4	7.10984e+06	777328	2.84522e+07	3.385e+06	4.36241e+06	60.4105	702408	1.56924e+08	2.29403e+06	109365	5.917e+06	2.36701e+06	126392	54297.5	649308	1.45612e+06	62479.1	2.18147e+08	227977	2.10055e+06	7.91583e+06	1.46451e+07
CS30426.	SUMJUV20_4	SummerJuveniles				635393	169562	276597	202972	977013	2.25695e+06	2.35061e+06	780092	188011	3.07651e+06	162690	9.671e+06	3.10191e+06	977319	253135	284667	7.7944e+06	3.61166e+06	7.26007e+06	180985	155269	528074	9.83134e+06	1.26858e+06	2.83064e+07	1.74445e+06	1.2776e+06	1273.27	737453	6.44752e+07	2.00705e+06	87730.9	5.74804e+06	2.04393e+06	112648	6951.08	1.33132e+06	1.07544e+06	97465.4	1.1942e+08	230078	1.69618e+06	2.53988e+06	1.12636e+07
CS30427.	SUMJUV20_5	SummerJuveniles				1.84207e+06	100014	361692	649036	597299	1.77508e+06	1.591e+06	334347	190570	989062	59457	3.77109e+06	2.55473e+06	577495	116403	67900.8	8.9308e+06	2.96567e+06	3.03707e+06	118770	104649	758774	6.51789e+06	843779	2.54249e+07	3.10197e+06	6.14833e+06	1830.24	522441	1.10401e+08	1.97201e+06	92339.1	4.28242e+06	3.65771e+06	201882	46567	825775	1.69587e+06	72769.8	1.45202e+08	161055	1.60746e+06	6.30895e+06	1.76572e+07
CS30433.	FALLJUV20_1	FallJuveniles				2.74387e+06	239887	431926	79905.4	1.71205e+06	3.72411e+06	3.11707e+06	1.12529e+06	428535	1.27665e+06	173095	1.20005e+07	9.28695e+06	2.66383e+06	121764	245231	8.98362e+06	1.00244e+07	3.85024e+06	278208	101275	1.4619e+06	1.16627e+07	1.91157e+06	5.13407e+07	828555	6.80201e+06	1991.8	733585	3.2615e+07	2.21634e+06	298552	6.38656e+06	7.171e+06	338243	286832	1.15143e+06	1.31723e+06	148060	3.85608e+07	73345.3	1.75497e+06	1.33859e+06	6.64956e+06
CS30434.	FALLJUV20_2	FallJuveniles				3.19867e+06	151214	180928	61419.2	1.50743e+06	2.61447e+06	2.21211e+06	548344	148882	3.43348e+06	102744	1.2274e+07	2.18455e+06	575155	64072	101232	6.97079e+06	1.08718e+07	6.66871e+06	144055	73520.4	553683	1.43078e+07	1.08242e+06	3.83208e+07	579064	7.03827e+06	1026.47	491838	2.50626e+07	2.49593e+06	134892	5.84217e+06	5.03522e+06	234138	282847	738706	806296	82790.9	1.83737e+07	108893	1.23862e+06	982002	3.36216e+06
CS30435.	FALLJUV20_3	FallJuveniles				1.83361e+06	165836	678338	147786	2.78892e+06	3.52855e+06	1.32464e+06	687806	162882	1.32135e+06	13769.9	1.40288e+07	2.82238e+06	1.88559e+06	57739.8	91941.1	1.00615e+07	9.20274e+06	2.3566e+06	305261	117804	594328	1.13538e+07	1.16609e+06	1.82395e+07	1.81283e+06	2.84354e+06	1229.97	1.71343e+06	4.22839e+07	1.77209e+06	22712.1	4.61055e+06	3.46417e+06	196976	377963	18362.7	2.00037e+06	106846	7.0243e+07	216965	1.20892e+06	6.34798e+06	6.9334e+06
CS30436.	FALLJUV20_4	FallJuveniles				4.68128e+06	278412	228660	43256.4	1.38838e+06	3.12154e+06	3.80208e+06	527452	202084	4.23306e+06	118303	1.72479e+07	1.74845e+06	542688	86247.8	183351	8.31191e+06	4.7329e+06	9.69796e+06	204030	106458	460128	2.43998e+07	1.03508e+06	3.39733e+07	2.28877e+06	3.24469e+06	2279.71	843026	5.9475e+07	2.55817e+06	136459	8.68591e+06	6.74053e+06	286368	173984	1.00991e+06	881513	139843	5.27728e+07	103654	1.8033e+06	2.61864e+06	1.57505e+07
CS30437.	WINTERJUV21_1	WinterJuveniles				932925	126588	107462	68104.1	960173	1.32107e+06	2.33099e+06	178760	206094	792882	91228	9.38592e+06	3.67753e+06	721679	5590.16	167886	5.32103e+06	5.24412e+06	2.36805e+06	14128.2	88527.8	286558	1.16794e+07	2.09236e+06	3.11412e+07	378017	7.21704e+06	1638.71	478685	2.92703e+07	2.6911e+06	19731.3	988592	2.75007e+06	125998	179425	27900.3	558912	60496.9	1.44466e+07	27690.2	3.52744e+06	3.27087e+06	893050
CS30438.	WINTERJUV21_2	WinterJuveniles				1.70099e+06	106625	164275	64769.2	944522	1.80525e+06	3.13176e+06	693518	175559	2.48486e+06	137631	9.62794e+06	1.88646e+06	409782	143747	207061	8.45417e+06	4.93295e+06	4.16766e+06	251088	56656.3	1.34908e+06	1.05532e+07	844440	2.95061e+07	1.11934e+06	190360	5516.5	509726	2.74696e+07	2.68017e+06	83316.7	4.08265e+06	2.69243e+06	144486	235849	402531	818275	69478	3.08153e+07	55933.3	1.51765e+06	571447	1.73828e+07
CS30439.	WINTERJUV21_3	WinterJuveniles				1.36347e+06	196331	362778	58576.2	2.14786e+06	3.15821e+06	3.19323e+06	857914	201295	2.09051e+06	233364	1.54791e+07	3.14044e+06	866226	66483.5	206964	8.51552e+06	3.95951e+06	3.44073e+06	286141	66653.7	286478	1.16932e+07	1.06836e+06	4.06361e+07	1.15219e+06	488735	1601.93	447399	3.0458e+07	3.07561e+06	107195	4.06319e+06	2.72163e+06	148814	216695	49578.3	1.2673e+06	77743.6	2.70296e+07	65099.7	1.35937e+06	3.77223e+06	6.82595e+06
CS30440.	WINTERJUV21_4	WinterJuveniles				446880	105567	149827	94058.7	1.11317e+06	1.7356e+06	1.80719e+06	810190	158879	2.16127e+06	62005	7.44536e+06	1.93139e+06	368299	45056.5	96830.2	5.97992e+06	4.58404e+06	2.72534e+06	135754	52525.3	501676	6.57887e+06	710543	3.60136e+07	614278	506285	581.933	445626	1.72002e+07	3.42636e+06	84707.9	5.89716e+06	2.20595e+06	116073	213003	979574	993543	56140.3	3.44425e+07	24824.4	1.94877e+06	395850	1.37274e+07
CS30441.	WINTERJUV21_5	WinterJuveniles				321936	62229.2	69861.1	68718.9	927613	2.77077e+06	1.44413e+06	626126	138991	2.38523e+06	43556	8.78638e+06	1.81954e+06	524837	24496.6	73079	2.51934e+06	2.19913e+06	2.96615e+06	146521	54681.3	641705	1.06645e+07	994583	2.16645e+07	1.51801e+06	136617	1459.78	510578	2.71141e+07	1.9053e+06	31047	6.28852e+06	2.03243e+06	104249	171075	758488	481245	47990	4.99841e+07	129089	731631	836211	4.87766e+06
CS30442.	SPRINGAD21_1	SpringAdults				2.75995e+06	180844	257406	79782.9	1.06136e+06	1.68308e+06	4.56784e+06	470148	178103	4.13457e+06	83546.7	7.41969e+06	2.29963e+06	491005	131766	220469	1.03804e+07	1.51016e+07	4.96257e+06	449099	62243.7	626946	1.86137e+07	1.56041e+06	4.15372e+07	809927	181394	217422	494953	3.91678e+07	2.74985e+06	209652	3.28715e+06	7.15447e+06	338788	233552	55710.4	1.01879e+06	101169	4.99534e+07	164993	1.31058e+06	1.66385e+06	3.66108e+06
CS30443.	SPRINGAD21_2	SpringAdults				1.23182e+06	125445	155826	90372	863706	1.96645e+06	1.72904e+06	815809	199742	1.37429e+06	56744.6	7.06343e+06	1.99489e+06	536702	168382	173356	7.43069e+06	1.09288e+07	3.5937e+06	168278	47377.8	719614	7.34794e+06	1.49005e+06	2.86126e+07	833179	1.55756e+06	1118.95	295680	3.34149e+07	2.2295e+06	108933	3.39914e+06	4.89e+06	233924	189268	301926	541656	56451.9	4.97249e+07	67891	1.38021e+06	1.44582e+06	1.1016e+07
CS30444.	SPRINGAD21_3	SpringAdults				3.44003e+06	109027	139438	97199	1.94322e+06	2.15793e+06	2.05498e+06	916380	166976	3.18708e+06	30319.5	1.18477e+07	1.66632e+06	798688	100322	172414	8.56222e+06	1.3166e+07	5.80745e+06	327237	44474.3	858069	1.14417e+07	3.05108e+06	2.54999e+07	2.88491e+06	119624	23831	478143	9.43738e+07	2.21815e+06	170768	8.29684e+06	6.18735e+06	293324	202769	984584	878484	91586.6	1.52124e+08	389775	1.83898e+06	1.14411e+07	1.88537e+07
CS32290.	SPRINGAD21_4	SpringAdults				730889	140152	122706	170111	379858	1.5083e+06	4.17645e+06	676600	151906	1.64393e+06	180383	5.1311e+06	1.90312e+06	451707	115875	141368	7.07953e+06	5.8103e+06	2.44455e+06	150324	39148.8	1.27079e+06	4.33948e+06	783762	4.6417e+07	560136	2.27913e+06	1726.59	226565	1.90535e+07	2.37842e+06	119672	2.88666e+06	2.85047e+06	133935	268973	274281	289540	82669.8	1.8435e+07	56443.7	1.31929e+06	953568	8.58323e+06
CS32291.	SPRINGAD21_5	SpringAdults				758216	267217	145987	828046	806984	1.57854e+06	3.85813e+06	842476	159198	2.26838e+06	112673	6.99488e+06	1.37466e+06	442281	60195.5	241949	1.52904e+07	9.77397e+06	3.29642e+06	185212	80776	1.01454e+06	3.86032e+06	2.04533e+06	3.88077e+07	879612	738224	1455.93	301274	2.42231e+07	3.18706e+06	84746.4	6.78608e+06	3.28588e+06	184939	202423	674812	739228	94505.8	3.76015e+07	124462	2.35223e+06	1.66497e+06	2.28063e+06
CS32292.	SUMAD21_1	SummerAdults				3.17775e+06	161498	378565	203762	1.82665e+06	3.49151e+06	1.93099e+06	932603	167529	1.97149e+06	120986	6.75405e+06	3.55619e+06	1.32451e+06	117569	118387	6.77558e+06	3.04626e+06	4.62053e+06	254751	68635	650905	1.06365e+07	2.08134e+06	2.19901e+07	1.75053e+06	2.79196e+06	1316.13	334861	4.80945e+07	1.91941e+06	133111	7.24154e+06	9.78545e+06	438781	286710	75541.3	923348	63170.5	6.5667e+07	201363	1.64876e+06	2.97985e+06	1.88385e+06
CS32293.	SUMAD21_2	SummerAdults				1.48973e+06	223045	310320	201512	915024	2.59082e+06	2.83184e+06	884855	215199	2.48526e+06	135098	7.99401e+06	2.56128e+06	837595	38278.3	295933	1.55085e+07	3.64805e+07	4.57679e+06	389702	75371.8	334513	1.59151e+07	1.14903e+07	4.33289e+07	1.48791e+06	201016	360968	476302	9.1921e+07	2.90004e+06	117785	6.23392e+06	3.92795e+06	226134	178306	18483.8	681367	74756.8	8.36708e+07	416410	2.48192e+06	6.98086e+06	8.41581e+06
CS32294.	SUMAD21_3	SummerAdults				3.6318e+06	180458	209549	440300	1.11642e+06	2.38292e+06	2.82315e+06	1.06402e+06	167382	1.13736e+06	585552	6.43221e+06	2.7479e+06	693860	51501.4	203525	7.04131e+06	6.24079e+07	3.97336e+06	118929	52333.7	668082	1.12632e+07	771961	3.79715e+07	3.26083e+06	7.23395e+06	229.124	402477	4.24613e+07	2.35311e+06	246448	4.95023e+06	3.17008e+06	150745	137828	40096	395329	69696.9	3.8382e+07	181250	1.78564e+06	4.78244e+06	7.85379e+06
CS32295.	SUMAD21_4	SummerAdults				1.43646e+06	110384	176105	973808	2.54392e+06	2.52595e+06	988334	1.41713e+06	238321	1.92316e+06	16091.8	4.77173e+06	2.40863e+06	1.18355e+06	353339	163867	1.48978e+07	1.40823e+07	2.99165e+06	208952	43100.9	533634	3.87859e+06	2.29661e+06	2.73469e+07	2.17418e+06	8.73247e+06	229.982	282088	6.33748e+07	1.26537e+06	57212.2	4.69015e+06	1.68911e+06	94696.3	191291	224181	536253	48661	4.31105e+07	200268	1.84704e+06	5.16127e+06	2.5028e+07
CS32591.	SUMAD21_5	SummerAdults				525409	207870	156331	517462	1.04094e+06	1.8348e+06	3.03417e+06	1.4208e+06	154534	905553	36571.7	7.01413e+06	2.62074e+06	796925	445237	190344	1.08938e+07	1.36757e+07	3.24153e+06	191983	50427.7	672201	9.01825e+06	4.56108e+06	3.43313e+07	710819	5.43564e+06	632.348	402259	2.89592e+07	2.41388e+06	45484.6	5.50065e+06	3.35135e+06	155519	359847	28191.3	504195	52675.8	3.59513e+07	83439.4	1.52431e+06	2.09172e+06	5.89042e+06
[truncated: 53 more columns]

## Sheet: Annotation level 1 (raw)
					DP	3.73191	34.759	8.52123	15.3821	6.73273	52.5519	27.5869	7.88055	42.9749	3.65613	9.24806	13.3878	36.2173	12.5286	5.3864	10.3054	6.91471	27.0658	10.975	8.30521	38.741	12.8067	73.8601	37.484	68.4649	32.1201	51.4157	6.18951	26.0151	5.71603	7.82969	10.3681	40.1807	9.81798	8.69221	19.3704	26.093	4.12029	4.35977	19.7983	152.486	8.26681	7.81788	12.2545
					Relative precision (%)	13.8063	4.1886	4.56866	4.15741	7.46471	2.65476	2.18862	6.10868	1.99958	17.9204	2.93378	8.23532	3.70133	12.2674	7.97276	5.55061	13.0324	2.53965	19.107	14.2194	2.50971	3.98367	1.41577	1.32579	0.831115	1.5826	1.20055	15.2992	1.76363	14.1582	18.9703	4.94661	1.25327	7.53819	10.1251	2.86939	1.28071	10.6126	11.5333	4.63025	0.789007	11.6118	9.50572	3.02337
					LOD	6872.52	24123	22372.5	231693	149385	181694	5407.88	17570.1	3409.84	374384	767313	38345.8	4137.53	5961.08	104863	339132	2798.42	17520.9	25431.4	19206.8	16984	3255.61	6151.84	3988.42	16705.7	1.75423e+06	15442	4249.54	4072.06	44262.8	952324	20501.3	5132.3	281630	345894	3593.57	24757	1.07421e+06	48344.6	475279	346187	33444	640511	4235.23
					RT [min]	4.617	6.38	1.325	1.292	4.878	6.22	1.46	5.13	1.31	8.279	1.496	2.42	1.4	7.6	5.34	7.906	1.28	1.32	4.591	9.03	6.933	1.25	4.38	5.14	3.81	2.19	4.14	13.4	2.41	9.025	1.522	2.04	1.65	4.793	2.899	5.85	5.62	2.27	2.71	7.56	4.34	8.321	2.021	1.29
					Molecular Weight	281.112	126.032	169.085	131.058	165.065	146.058	158.044	136.039	174.112	152.12	161.105	192.027	175.096	360.194	176.095	230.152	196.058	147.053	612.152	286.214	173.105	155.069	136.039	268.081	131.095	90.0317	131.095	280.24	149.051	371.303	187.169	117.043	174.1	122.048	123.032	219.111	165.079	129.079	129.043	202.121	118.027	258.183	264.104	119.058
					Formula	C11 H15 N5 O4		C7 H11 N3 O2	C5 H9 N O3	C6 H7 N5 O					C10 H16 O	C7 H15 N O3				C10 H12 N2 O	C12 H22 O4			C20 H32 N6 O12 S2		C8 H15 N O3									C21 H41 N O4	C9 H21 N3 O			C6 H6 N2 O	C6 H5 N O2			C6 H11 N O2				C14 H26 O4	C12 H16 N4 O S
					Annotation level	1	1	1	1	1	1	1	1	1	1	1	1	1	1	1	1	1	1	1	1	1	1	1	1	1	1	1	1	1	1	1	1	1	1	1	1	1	1	1	1	1	1	1	1
					Name	1-Methyl Adenosine	3-Hydroxy-2-methyl-4-pyrone	3-Methylhistidine	4-Hydroxyproline	7-Methylguanine	Adipic acid	Allantoin	Allopurinol	Arginine	Camphor	Carnitine	Citric acid	Citrulline	Cortisone	Cotinine	Dodecanedioic acid	Galactonic acid	Glutamic acid	Glutathione disulfide	Hexadecanedioic acid	Hexanoyl Glycine	Histidine	Hypoxanthine	Inosine	Isoleucine	Lactic acid	Leucine	Linoleic acid	Methionine	Myristoylcarnitine	N8-Acetylspermidine	N-Acetyl-glycine	N-Acetyl-ornithine	Nicotine amide	Nicotinic acid	Pantothenic acid	Phenylalanine	Pipecolinic acid	Pyroglutamic acid	Sebacic acid	Succinic acid	Tetradecanedioic acid	Thiamine	Threonine
					Compound #	X02931	SL00018	X00337	X01737	X03342	SL00227	SL00037	SL00038	SL00238	X05305	X00009	SL00246	SL00055	SL00056	X00390	X01921	SL00264	SL00270	X01383	SL00285	X01277	SL00096	SL00291	SL00103	SL00106	SL00301	SL00111	SL00113	SL00120	X01983	X01732	SL00124	SL00127	X00156	X01065	SL00137	SL00138	X00887	SL00335	SL00345	SL00352	X02669	X00027	SL00364
MS-Omics_ID	Costumer_ID	Study Group			Unit	Area	Area	Area	Area	Area	Area	Area	Area	Area	Area	Area	Area	Area	Area	Area	Area	Area	Area	Area	Area	Area	Area	Area	Area	Area	Area	Area	Area	Area	Area	Area	Area	Area	Area	Area	Area	Area	Area	Area	Area	Area	Area	Area	Area
CS30423.	SUMJUV20_1	SummerJuveniles				8.22085e+06	1.71182e+06	1.18949e+08	3.02721e+06	6.10195e+06	5.22229e+06	3.22284e+07	122541	8.37809e+06	855222	6.97039e+08	1.13479e+08	3.03664e+06	322674	2.75502e+07	6.92971e+06	5.11113e+07	2.41844e+07	2.01921e+07	1.77976e+06	1.44857e+06	8.3318e+06	2.08164e+07	1.04974e+07	8.77354e+06	1.26873e+09	1.52979e+07	1.31421e+07	5.62814e+06	4.42502e+06	1.92706e+07	203142	763038	4.58216e+08	2.04183e+07	7.71807e+06	3.53195e+07	1.4969e+07	2.30825e+07	5.25477e+06	1.80492e+08	3.37907e+06	9.96392e+06	4.60793e+06
CS30424.	SUMJUV20_2	SummerJuveniles				5.52576e+06	813263	1.26306e+08	3.57891e+06	5.17477e+06	3.37916e+06	1.60236e+07	127559	853936	674589	8.00008e+08	1.08005e+08	746746	510803	6.3774e+07	1.07026e+07	4.72151e+07	2.27059e+07	3.09824e+07	3.39246e+06	961521	1.25932e+07	1.91645e+07	1.1327e+07	4.0497e+06	1.30903e+09	7.21493e+06	9.29528e+06	4.93225e+06	1.14039e+07	8.61002e+06	186512	627475	4.08437e+08	1.77455e+06	5.89268e+06	2.31136e+07	2.48287e+07	1.84588e+07	6.74891e+06	1.47439e+08	7.35461e+06	1.33543e+07	3.70158e+06
CS30425.	SUMJUV20_3	SummerJuveniles				5.37407e+06	360997	8.26295e+07	3.16137e+06	3.45681e+06	4.70722e+06	1.44222e+07	93149	1.24102e+07	1.98011e+06	1.00725e+09	2.44532e+07	1.04286e+06	2.38294e+06	9.26198e+07	3.38278e+06	3.09185e+07	1.62286e+07	1.72998e+07	889436	471708	1.67618e+07	1.56123e+07	8.8406e+06	7.5622e+06	1.03339e+09	1.35414e+07	8.19549e+06	7.04102e+06	5.14609e+06	6.4069e+06	111503	369854	2.5875e+08	1.08155e+07	7.24746e+06	3.37376e+07	1.59663e+07	1.7955e+07	2.03907e+06	7.36239e+07	2.10461e+06	5.67956e+06	8.69532e+06
CS30426.	SUMJUV20_4	SummerJuveniles				5.11453e+06	454903	8.93952e+07	2.54876e+06	4.97225e+06	6.16399e+06	1.85204e+07	74135.5	1.35869e+07	2.45494e+06	9.6123e+08	4.99486e+07	1.42628e+06	1.19578e+06	8.12641e+07	5.86068e+06	3.93726e+07	2.1918e+07	2.02525e+07	812985	1.24468e+06	1.66711e+07	1.15481e+07	5.68663e+06	6.26795e+06	1.32658e+09	1.1532e+07	9.91378e+06	9.12075e+06	4.26426e+06	8.50313e+06	249875	416659	1.63583e+08	1.25152e+07	6.4506e+06	3.12017e+07	2.39481e+07	2.05844e+07	3.41435e+06	1.00159e+08	2.51612e+06	7.55328e+06	9.18243e+06
CS30427.	SUMJUV20_5	SummerJuveniles				6.37672e+06	1.04446e+06	5.80669e+07	2.30795e+06	4.37548e+06	1.64225e+06	1.33884e+07	60228.1	1.16479e+07	1.65218e+06	8.57057e+08	2.5445e+07	1.01805e+06	578639	7.22745e+07	2.66454e+06	1.41438e+07	2.12703e+07	2.50304e+07	444339	645197	1.36292e+07	1.51839e+07	4.94586e+06	3.6437e+06	1.06885e+09	6.84934e+06	6.80714e+06	6.18866e+06	3.03254e+06	5.30521e+06	124302	412893	3.19838e+08	3.56632e+06	8.87613e+06	2.30002e+07	1.5218e+07	1.94562e+07	1.81181e+06	2.44728e+07	1.31089e+06	6.58602e+06	6.07418e+06
CS30433.	FALLJUV20_1	FallJuveniles				7.22912e+06	327828	1.52061e+08	5.92321e+06	4.86875e+06	8.08992e+06	1.90694e+07	186262	4.44757e+06	1.859e+06	1.40248e+09	1.64073e+08	1.40616e+06	122295	9.02235e+07	1.53937e+07	2.81092e+07	3.35551e+07	1.95749e+07	2.24257e+06	3.58634e+06	2.00445e+07	2.01689e+07	1.77572e+07	1.05439e+07	1.61935e+09	1.99119e+07	2.52191e+06	1.01061e+07	3.54173e+06	6.6975e+06	186143	619130	3.08132e+08	7.60219e+06	1.23259e+07	4.21474e+07	3.1833e+07	2.43372e+07	8.3899e+06	1.62658e+08	5.96863e+06	1.46156e+07	1.02712e+07
CS30434.	FALLJUV20_2	FallJuveniles				2.86048e+06	445813	8.79258e+07	2.66795e+06	2.46009e+06	1.46157e+06	1.35413e+07	143025	8.52562e+06	2.07609e+06	1.18969e+09	1.30374e+08	1.19801e+06	204790	1.0352e+08	5.42822e+06	2.12432e+07	2.88032e+07	7.04254e+06	472420	3.89078e+06	1.98786e+07	1.40948e+07	1.26536e+07	1.01285e+07	1.35313e+09	1.79398e+07	4.47875e+06	8.59728e+06	1.57027e+06	4.36267e+06	127557	355611	1.8017e+08	9.65791e+06	8.26496e+06	3.44925e+07	2.5018e+07	2.75478e+07	2.0187e+06	1.66915e+08	1.6136e+06	6.24354e+06	9.84903e+06
CS30435.	FALLJUV20_3	FallJuveniles				9.25641e+06	723122	1.4083e+08	3.61711e+06	5.4828e+06	2.76992e+06	1.97678e+07	152093	3.23787e+06	350631	1.03838e+09	7.11905e+07	652808	304115	1.5321e+08	4.49227e+06	2.71146e+07	1.74799e+07	6.66427e+06	789564	2.97195e+06	4.74994e+06	8.26761e+06	1.41766e+07	7.71278e+06	7.97775e+08	1.33279e+07	2.49557e+06	7.07375e+06	4.10208e+06	1.22309e+07	285590	370472	2.36e+08	1.80075e+06	6.08601e+06	3.03137e+07	1.61345e+07	1.74212e+07	3.5432e+06	7.68674e+07	2.47126e+06	7.7999e+06	7.46784e+06
CS30436.	FALLJUV20_4	FallJuveniles				3.76118e+06	493529	6.73218e+07	2.35589e+06	2.98433e+06	7.25207e+06	1.80461e+07	143573	1.78074e+07	2.62946e+06	1.42046e+09	1.36175e+08	1.79675e+06	25554.4	7.66177e+07	6.2177e+06	3.7259e+07	2.74987e+07	1.63933e+07	559110	1.10786e+07	2.74339e+07	1.70745e+07	1.23408e+07	1.5193e+07	1.29246e+09	2.96368e+07	1.38009e+07	1.23378e+07	4.14139e+06	1.0195e+07	174915	286069	3.87987e+08	7.88301e+06	1.01103e+07	4.61531e+07	2.26881e+07	2.73376e+07	1.71353e+06	1.86471e+08	1.80575e+06	8.93338e+06	1.03337e+07
CS30437.	WINTERJUV21_1	WinterJuveniles				1.62997e+06	111445	7.58434e+07	2.45813e+06	1.6892e+06	1.03794e+06	1.05219e+07	73068.8	9.63918e+06	639243	1.05036e+09	1.61915e+07	1.52907e+06	66957.2	4.08201e+06	5.1579e+06	8.06292e+06	2.3154e+07	1.66157e+07	528542	1.98882e+06	9.00686e+06	1.59605e+07	6.98703e+06	4.51505e+06	9.17235e+08	8.29e+06	492133	7.52973e+06	361602	602735	107346	385543	1.01111e+08	4.40835e+06	4.20791e+06	1.95866e+07	1.42263e+07	1.0371e+07	2.78615e+06	7.02263e+07	1.55411e+06	5.31054e+06	9.1739e+06
CS30438.	WINTERJUV21_2	WinterJuveniles				3.15035e+06	244234	1.19581e+08	2.22016e+06	4.66011e+06	878189	1.56607e+07	158270	1.07636e+07	717215	9.16552e+08	4.66562e+07	1.16696e+06	166142	1.0346e+08	2.44204e+06	1.31179e+07	1.85297e+07	445599	185936	1.11008e+06	1.59692e+07	1.32682e+07	1.53916e+07	7.06277e+06	1.11167e+09	1.30075e+07	4.42611e+06	7.51481e+06	1.11482e+06	1.4965e+06	144175	354225	1.74756e+08	6.70461e+06	6.72505e+06	3.10447e+07	4.29732e+07	2.13144e+07	1.79953e+06	9.6558e+07	508524	1.01832e+07	1.01228e+07
CS30439.	WINTERJUV21_3	WinterJuveniles				2.43511e+06	290250	1.3669e+08	1.65806e+07	2.73822e+06	1.48894e+06	1.70533e+07	178203	1.33038e+07	275635	1.05269e+09	3.4495e+07	1.7371e+06	206996	1.09424e+08	6.51925e+06	1.43592e+07	1.7164e+07	1.62467e+06	433060	1.54467e+06	1.51133e+07	1.16339e+07	1.61243e+07	1.03688e+07	1.14117e+09	2.02132e+07	4.00433e+06	1.03445e+07	1.55516e+06	1.0009e+06	126390	919485	9.14294e+07	2.16548e+07	3.8566e+06	3.69522e+07	3.29915e+07	1.72424e+07	2.53439e+06	6.65433e+07	1.50789e+06	6.83286e+06	1.34223e+07
CS30440.	WINTERJUV21_4	WinterJuveniles				3.64425e+06	211637	9.11016e+07	2.64399e+06	2.80955e+06	874817	1.06363e+07	109621	6.66394e+06	365431	7.6593e+08	4.23869e+07	817415	231847	1.14461e+08	2.29286e+06	1.83723e+07	1.56761e+07	285936	239705	1.9662e+06	1.68423e+07	1.09635e+07	1.00116e+07	5.07652e+06	1.05932e+09	8.50182e+06	4.69579e+06	6.48474e+06	719514	6.61793e+06	107637	240679	1.22723e+08	3.70959e+06	6.2407e+06	2.37776e+07	2.53195e+07	1.64774e+07	1.37573e+06	1.28269e+08	687648	5.8519e+06	9.90376e+06
CS30441.	WINTERJUV21_5	WinterJuveniles				2.93898e+06	491139	5.83706e+07	1.73387e+06	1.86702e+06	827029	6.28183e+06	67107.3	6.93452e+06	237531	5.9101e+08	7.94385e+07	713493	247165	1.28158e+08	2.47362e+06	1.05809e+07	1.31642e+07	556019	499685	1.51608e+06	1.24948e+07	9.4273e+06	5.36035e+06	4.90914e+06	6.66986e+08	8.8284e+06	7.84821e+06	4.7027e+06	834449	5.7948e+06	121691	160169	1.90314e+08	1.03562e+06	3.99178e+06	2.13702e+07	2.61433e+07	1.58999e+07	2.12493e+06	3.64144e+07	1.11406e+06	6.31044e+06	5.5214e+06
CS30442.	SPRINGAD21_1	SpringAdults				4.49283e+06	240659	1.14834e+08	2.42671e+06	4.17488e+06	1.14187e+06	1.40296e+07	141716	6.51199e+06	2.04515e+06	1.49873e+09	5.61579e+07	1.10256e+06	254938	6.58951e+07	5.34806e+06	1.18276e+07	3.37069e+07	5.13536e+06	483987	4.47367e+06	1.06755e+07	1.77506e+07	1.31522e+07	5.80996e+06	1.16896e+09	1.00723e+07	6.01988e+06	7.49217e+06	2.36976e+06	592798	144161	492364	1.59787e+08	4.60104e+06	6.77282e+06	3.15127e+07	2.4414e+07	1.56647e+07	2.63687e+06	7.45478e+07	1.6412e+06	1.14015e+07	9.15817e+06
CS30443.	SPRINGAD21_2	SpringAdults				3.98881e+06	211476	1.38438e+08	3.59441e+06	3.26806e+06	1.22946e+06	1.39005e+07	142502	3.31592e+06	396695	1.63115e+09	2.70275e+07	956275	163324	6.45209e+07	3.81659e+06	8.53262e+06	2.08998e+07	1.53053e+06	253914	1.20577e+06	2.40577e+07	1.32953e+07	1.33585e+07	6.23374e+06	1.02194e+09	1.13127e+07	2.24164e+06	4.82753e+06	2.08937e+06	1.97548e+06	133707	366055	2.45593e+08	4.28287e+06	4.24921e+06	2.99213e+07	3.00918e+07	1.90552e+07	2.11318e+06	7.78422e+07	766703	6.31543e+06	7.86265e+06
CS30444.	SPRINGAD21_3	SpringAdults				5.43628e+06	498666	1.20383e+08	2.43617e+06	4.62167e+06	1.7633e+06	1.30869e+07	149689	1.07365e+06	581256	1.27306e+09	8.79848e+07	751810	201945	6.41858e+07	5.4192e+06	2.06158e+07	2.52397e+07	2.14908e+06	829112	997148	7.92284e+06	1.51599e+07	1.37238e+07	6.65313e+06	1.02946e+09	1.11241e+07	8.22707e+06	5.19433e+06	1.91737e+06	2.77275e+06	297897	550193	1.29009e+08	2.48046e+06	6.76891e+06	3.03751e+07	1.47752e+07	2.08595e+07	2.79e+06	1.37933e+08	1.67869e+06	7.81856e+06	8.53294e+06
CS32290.	SPRINGAD21_4	SpringAdults				3.41323e+06	63985.1	8.88356e+07	2.90583e+06	3.41972e+06	1.74202e+06	1.37743e+07	98246.6	1.21949e+07	243767	1.14189e+09	1.73722e+07	1.05667e+06	23936.9	1.28406e+08	2.71622e+06	9.24929e+06	2.23857e+07	1.63712e+06	252826	1.77075e+06	1.98523e+07	1.00101e+07	8.2609e+06	7.44946e+06	9.09838e+08	1.27825e+07	3.38393e+06	5.16412e+06	1.8496e+06	1.14278e+06	139090	499498	1.84439e+08	8.06e+06	5.47824e+06	3.38261e+07	4.52477e+07	1.36538e+07	2.07347e+06	7.90327e+07	672424	7.13935e+06	9.77322e+06
CS32291.	SPRINGAD21_5	SpringAdults				3.66577e+06	207795	1.04763e+08	6.57137e+06	3.966e+06	702753	1.5429e+07	153537	4.01475e+06	251883	1.32476e+09	3.31838e+07	798666	106092	8.35658e+07	2.22522e+06	2.20508e+07	1.94817e+07	1.28141e+06	252991	1.46472e+06	2.10008e+07	1.10873e+07	1.27482e+07	6.82345e+06	1.13826e+09	1.12685e+07	4.01209e+06	5.8566e+06	1.15581e+06	1.24937e+06	106183	830756	1.09851e+08	1.01986e+07	5.98797e+06	3.34451e+07	2.10983e+07	2.20568e+07	1.85072e+06	1.23613e+08	712285	6.21794e+06	8.75757e+06
CS32292.	SUMAD21_1	SummerAdults				6.4248e+06	684266	1.12927e+08	3.19608e+06	3.64442e+06	1.60526e+06	1.70459e+07	209770	1.00349e+07	402538	1.38001e+09	2.50846e+07	1.2319e+06	95799.3	1.53343e+08	7.15835e+06	9.69795e+06	1.7885e+07	2.58629e+06	867054	780702	8.23332e+06	7.65863e+06	1.94776e+07	8.71973e+06	7.90187e+08	1.54042e+07	3.23537e+06	6.98264e+06	1.93791e+06	3.07829e+06	215328	659178	2.71682e+08	3.39809e+06	5.94129e+06	3.43758e+07	4.45088e+07	1.71246e+07	4.43663e+06	4.70631e+07	2.26736e+06	5.21317e+06	7.83827e+06
CS32293.	SUMAD21_2	SummerAdults				3.53624e+06	181690	1.76308e+08	4.99321e+06	3.04227e+06	1.4349e+06	1.63512e+07	160045	3.14543e+06	307051	1.32088e+09	2.52319e+07	1.07869e+06	182133	9.41764e+07	5.52306e+06	1.29127e+07	2.60036e+07	656052	535016	2.06667e+06	9.27907e+06	1.86864e+07	1.4517e+07	1.01462e+07	1.06385e+09	1.77381e+07	2.88682e+06	1.03547e+07	1.20656e+06	8.5578e+06	159214	1.41492e+06	1.74995e+08	3.47207e+07	5.42311e+06	4.78732e+07	1.4441e+07	2.26649e+07	2.2982e+06	3.46584e+07	1.91238e+06	5.30587e+06	1.41754e+07
CS32294.	SUMAD21_3	SummerAdults				3.42724e+06	236483	1.33676e+08	2.83931e+06	2.64331e+06	1.20197e+06	1.28744e+07	93173.6	944408	136533	9.54533e+08	6.13237e+07	1.27865e+06	291182	9.30867e+07	6.4913e+06	1.09879e+07	1.59963e+07	2.10543e+06	1.35078e+06	2.05648e+06	1.39096e+07	6.79373e+06	8.9853e+06	5.66418e+06	1.08437e+09	1.02146e+07	8.29315e+06	5.3415e+06	8.20367e+06	1.91699e+06	178942	1.45798e+06	1.5248e+08	4.41396e+06	4.16442e+06	3.09524e+07	3.21778e+07	2.35217e+07	2.96262e+06	1.27803e+08	3.57844e+06	3.93465e+06	8.97004e+06
CS32295.	SUMAD21_4	SummerAdults				4.53978e+06	875215	1.07374e+08	2.17104e+06	3.05823e+06	1.55758e+06	9.41593e+06	110285	3.3715e+06	1.47035e+06	1.09723e+09	3.22767e+07	590802	24614.4	1.52722e+08	5.34374e+06	1.84317e+07	1.47364e+07	122156	679267	348522	1.16371e+07	1.28194e+07	1.00436e+07	4.11261e+06	1.21974e+09	7.65303e+06	2.96384e+06	3.58863e+06	3.44826e+06	4.12784e+06	164430	1.41149e+06	2.44743e+08	1.93904e+06	6.21375e+06	2.43002e+07	2.46334e+07	1.11459e+07	3.83199e+06	1.70944e+08	1.41662e+06	8.03751e+06	3.52438e+06
CS32591.	SUMAD21_5	SummerAdults				2.68045e+06	92030.4	8.69199e+07	1.97141e+06	2.5576e+06	1.94336e+06	1.30863e+07	99335.8	8.03715e+06	449450	1.00093e+09	1.94479e+07	951531	21759.1	1.61467e+08	5.04636e+06	1.23718e+07	1.50993e+07	179600	511910	2.04064e+06	1.59406e+07	8.06609e+06	9.41313e+06	6.53346e+06	9.0509e+08	1.13026e+07	2.07877e+06	4.66948e+06	759323	2.31746e+06	122229	1.42113e+06	1.54448e+08	9.5421e+06	6.26661e+06	3.39831e+07	3.01881e+07	2.00708e+07	2.53683e+06	1.02362e+08	1.69538e+06	2.64436e+06	9.30829e+06
[truncated: 9 more columns]

## Sheet: No annotations (raw)
					DP	1.42136	16.3063	3.28651	11.3135	3.84427	5.32873	3.95958	9.72393	3.1775	4.7819	6.68836	6.33764	40.3505	11.3472	2.01776	2.25326	25.8771	2.64591	2.28589	9.09301	4.22198	2.63665	2.97189	2.0365	3.07112	4.14073	2.98921	10.5713	2.51033	1.97877	7.22744	10.9537	10.9537	11.7873	21.9807	3.6948	8.89072	5.02054	2.89146	4.27733	8.33606	5.83234	20.2123	4.8462
					Relative precision (%)	19.8957	10.5433	9.21106	2.26399	16.8862	14.5275	15.5114	15.9732	9.32097	5.62106	11.0873	6.71408	1.31989	3.8771	17.4757	11.5608	2.49699	12.0356	14.3601	12.9488	19.4958	12.7448	14.8052	17.6422	13.8311	8.35637	9.31039	3.30789	13.0007	11.9107	9.87188	12.6542	12.6542	9.72003	4.68784	8.21201	10.4473	10.0078	12.1708	17.9458	4.19112	5.91176	3.08105	13.2915
					LOD	654208	57923.3	136365	38270.2	24627.2	21830.8	144607	12739.9	335524	98778.3	7372.12	53652.1	27960.8	10516.2	235453	128584	4975.47	110165	184344	271111	34115.8	5363.88	26937.2	2.8487e+06	7.6499e+06	71144.3	64780.6	50936.7	3987.65	5514.53	49194.1	14370.5	14400.8	227662	11805.7	620328	682485	43997.6	9298.92	115813	3363.99	7017.16	3034.5	47171.1
					RT [min]	12.767	1.563	1.209	1.209	6.92	6.815	10.108	5.811	1.318	1.121	5.043	1.319	1.206	1.216	6.924	5.623	1.208	1.203	6.822	6.504	1.313	1.212	1.266	2.72	1.124	1.121	1.132	1.112	1.124	6.219	4.937	6.053	6.053	5.729	4.383	6.68	6.56	1.581	1.214	5.382	1.23	4.719	1.464	1.375
					Molecular Weight	51.036	52.0314	57.9587	59.9558	60.9331	60.9331	61.0204	64.0539	66.9946	67.975	68.0627	73.0052	75.9297	75.9306	76.0313	76.0314	77.9277	79.9406	80.0626	80.0626	80.9502	81.04	81.9241	83.0371	83.9524	83.9574	85.0014	85.9485	86.9688	90.0464	90.047	91.0421	92.05	92.0679	93.0327	93.0457	95.0615	96.0688	97.014	97.0891	97.9125	98.0004	98.0117	100.072
					Formula		C4 H4									C5 H8				C6 H4	C6 H4			C6 H8	C6 H8				C4 H5 N O							C7 H6	C6 H5 N			C4 H3 N3			C5 H8 N2		C6 H11 N		C4 H2 O3	C3 H2 N2 O2
					Annotation level
					Name
					Compound #	X04910	X00637	X00289	X00822	X03448	X05001	X05967	X06551	X00946	X01503	X05260	X06638	X01707	X04625	X03701	X03524	X07090	X00370	X05318	X03705	X02186	X01647	X03553	X00622	X00331	X05653	X03326	X06979	X08274	X04485	X08235	X05247	X05725	X03077	X01400	X02485	X02468	X05151	X01589	X08285	X06227	X08994	X02512	X04225
MS-Omics_ID	Costumer_ID	Study Group			Unit	Area	Area	Area	Area	Area	Area	Area	Area	Area	Area	Area	Area	Area	Area	Area	Area	Area	Area	Area	Area	Area	Area	Area	Area	Area	Area	Area	Area	Area	Area	Area	Area	Area	Area	Area	Area	Area	Area	Area	Area	Area	Area	Area	Area
CS30423.	SUMJUV20_1	SummerJuveniles				1.22963e+06	1.23127e+06	1.03043e+08	3.80217e+07	156762	94426.8	1.0874e+06	886029	4.50545e+07	1.88495e+07	907672	1.58552e+06	1.37257e+07	2.98425e+06	3.01651e+06	1.02501e+06	1.20018e+06	6.24355e+07	524981	2.67991e+06	1.48044e+06	1.321e+06	3.72863e+06	1.76496e+07	1.89374e+08	2.00516e+06	5.17563e+06	1.33041e+06	469058	503349	253173	225141	216731	3.07932e+06	434728	7.66795e+06	3.40399e+06	493048	1.6691e+06	90513.7	1.81594e+06	385223	1.9556e+06	2.63384e+06
CS30424.	SUMJUV20_2	SummerJuveniles				1.29307e+06	1.25676e+06	1.53753e+08	4.55399e+07	120478	72391.2	1.53162e+06	640527	2.29823e+07	1.70894e+07	2.69675e+06	755202	1.1699e+07	3.49531e+06	1.97368e+06	693651	1.02066e+06	1.11124e+08	282411	4.09635e+06	1.65223e+06	2.09247e+06	1.79071e+06	2.17713e+07	1.69921e+08	1.74875e+06	3.92559e+06	1.19566e+06	354878	604648	56797	146153	140694	3.6326e+06	385609	2.61177e+06	3.33486e+06	419682	2.48614e+06	46575.7	1.82751e+06	234903	910032	1.6271e+06
CS30425.	SUMJUV20_3	SummerJuveniles				1.12597e+06	2.72058e+06	1.5421e+08	4.59284e+07	123211	56624.8	1.22644e+06	430275	2.95243e+07	1.5134e+07	762985	784343	1.25318e+07	2.95496e+06	3.06042e+06	1.11976e+06	986252	1.10351e+08	584067	1.75156e+06	933293	2.93996e+06	1.05389e+06	1.7134e+07	2.82569e+07	1.67706e+06	3.67284e+06	1.12787e+06	536357	1.13597e+06	124296	73590.9	70842	942082	329536	7.66585e+06	1.77075e+06	386816	3.56093e+06	101439	1.79543e+06	510176	824261	2.29085e+06
CS30426.	SUMJUV20_4	SummerJuveniles				1.24341e+06	3.17004e+06	1.57295e+08	4.64801e+07	123986	62424.6	1.47728e+06	605897	2.23592e+07	1.61296e+07	1.52595e+06	556616	1.09345e+07	3.03177e+06	2.51563e+06	924559	934507	1.14867e+08	556230	3.32686e+06	617977	3.29485e+06	930163	1.7475e+07	1.89733e+08	1.80705e+06	4.50904e+06	1.28551e+06	480888	943951	61917.3	120203	115713	1.20959e+06	215132	7.10122e+06	1.62435e+06	501137	4.01411e+06	144154	1.86842e+06	372317	1.23155e+06	776509
CS30427.	SUMJUV20_5	SummerJuveniles				1.80639e+06	2.41705e+06	1.50572e+08	4.41487e+07	140681	68790.7	1.53761e+06	535327	2.01607e+07	1.74646e+07	1.17986e+06	466210	1.1701e+07	2.49307e+06	2.86441e+06	840793	965239	1.11032e+08	718625	1.66317e+06	776405	2.82348e+06	1.16137e+06	1.98212e+07	1.53285e+08	1.68954e+06	4.9812e+06	1.05979e+06	464275	773521	45577.8	83739.2	80611.2	1.20347e+06	310033	8.88542e+06	1.35004e+06	518522	3.39051e+06	140878	1.90822e+06	486302	744416	670048
CS30433.	FALLJUV20_1	FallJuveniles				1.02688e+06	3.28803e+06	1.67384e+08	4.94121e+07	270010	133267	1.12247e+06	2.41872e+06	2.94398e+07	1.94098e+07	3.38272e+06	828882	1.11581e+07	2.71817e+06	3.68216e+06	1.40234e+06	803675	1.27579e+08	730307	6.03319e+06	946733	4.91663e+06	2.13685e+06	2.10236e+07	2.04428e+08	2.40373e+06	5.79234e+06	1.55175e+06	807149	957021	63908.4	271368	261231	5.25344e+06	386618	6.05884e+06	1.16418e+07	879226	5.8888e+06	372627	1.70331e+06	706627	1.12264e+06	654947
CS30434.	FALLJUV20_2	FallJuveniles				699770	2.47726e+06	1.08621e+08	4.07604e+07	94466	62707.6	653698	566241	2.29777e+07	1.58474e+07	903392	423104	1.03224e+07	2.71564e+06	2.86802e+06	881833	850592	7.07848e+07	372922	945693	851967	3.17736e+06	2.82235e+06	2.14034e+07	1.48697e+08	1.60669e+06	4.39006e+06	1.06122e+06	429018	722542	29647.8	205902	198211	4.76396e+06	270058	1.25967e+06	3.07262e+06	829638	3.90639e+06	285516	1.71174e+06	272958	806181	522303
CS30435.	FALLJUV20_3	FallJuveniles				816624	1.60325e+06	1.35763e+08	4.03729e+07	121924	91826.3	1.46067e+06	834178	1.64708e+07	2.08091e+07	892239	617363	1.04414e+07	2.95258e+06	2.75022e+06	1.11661e+06	858211	9.72721e+07	478240	1.4538e+06	865004	2.4046e+06	2.222e+06	1.67261e+07	1.39372e+08	1.62143e+06	6.14844e+06	998543	525634	610004	30954.3	472770	455110	4.34518e+06	152983	6.13842e+06	661308	338475	2.87657e+06	56724.9	1.79098e+06	300962	1.23109e+06	1.03857e+06
CS30436.	FALLJUV20_4	FallJuveniles				1.12872e+06	2.32214e+06	1.09255e+08	4.37058e+07	103542	55793.5	806850	367267	2.42653e+07	1.73313e+07	948378	592649	1.22901e+07	1.72229e+06	2.24034e+06	1.27036e+06	972064	7.45298e+07	493059	1.11194e+06	1.1048e+06	2.59057e+06	2.0861e+06	2.13129e+07	1.47514e+08	1.45289e+06	5.54125e+06	991755	385249	1.16896e+06	43941.2	96415.3	92813.8	1.71028e+06	363461	5.86354e+06	2.57309e+06	378111	3.12765e+06	324808	1.07464e+06	307929	1.12454e+06	1.0981e+06
CS30437.	WINTERJUV21_1	WinterJuveniles				242493	3.90888e+06	1.17966e+08	3.65444e+07	148900	71955.2	553961	694108	1.88351e+07	1.04463e+07	389945	442143	1.32408e+07	2.29485e+06	3.29524e+06	551717	1.18009e+06	7.81503e+07	575612	1.75108e+06	1.56381e+06	2.391e+06	1.27905e+06	8.57331e+06	1.57723e+08	1.59951e+06	3.16596e+06	1.16567e+06	287458	451508	32708.5	109250	105169	4.21197e+06	320093	6.82082e+06	4.62626e+06	754032	3.04431e+06	178685	1.52713e+06	416057	683200	519662
CS30438.	WINTERJUV21_2	WinterJuveniles				925287	2.80193e+06	1.44163e+08	4.08281e+07	123090	63100.7	1.7594e+06	458310	2.75212e+07	1.56061e+07	822069	574880	1.088e+07	2.95749e+06	3.05833e+06	1.13436e+06	909552	1.04044e+08	432267	718371	584268	4.67625e+06	1.73068e+06	2.04789e+07	1.52205e+08	1.55045e+06	5.38822e+06	1.27786e+06	514006	956862	276714	108554	104499	1.83234e+06	263720	6.12645e+06	1.88451e+06	3.18079e+06	5.77662e+06	611274	1.8786e+06	289336	869635	542030
CS30439.	WINTERJUV21_3	WinterJuveniles				613072	3.71241e+06	1.39557e+08	4.1041e+07	64333.3	44386.5	991325	271340	2.72606e+07	1.51927e+07	1.00298e+06	566105	6.85288e+06	1.90225e+06	4.53906e+06	1.23913e+06	525287	1.07035e+08	1.22019e+06	1.45352e+06	642527	4.36277e+06	919940	1.52555e+07	1.44063e+08	1.51571e+06	3.81839e+06	1.0568e+06	412387	859264	13067.5	84575.6	81416.4	2.56141e+06	214808	7.32605e+06	2.36331e+06	1.99177e+06	5.06974e+06	574654	1.36963e+06	387738	968942	1.2099e+06
CS30440.	WINTERJUV21_4	WinterJuveniles				758717	2.67678e+06	1.51663e+08	4.56614e+07	76003.2	47179.3	1.00148e+06	353160	3.10108e+07	1.60269e+07	594563	764075	8.11347e+06	2.23426e+06	2.35136e+06	751926	628060	1.16956e+08	397226	932432	440259	5.21087e+06	2.65109e+06	1.56726e+07	1.52233e+08	1.54651e+06	4.226e+06	1.13196e+06	389302	928938	138284	68279.9	65729.4	2.17759e+06	215083	5.30171e+06	2.89534e+06	2.33479e+06	6.17376e+06	122691	1.50204e+06	245049	632209	550247
CS30441.	WINTERJUV21_5	WinterJuveniles				644602	1.64732e+06	1.4322e+08	4.38577e+07	74571	47519.9	597947	217468	3.57261e+07	1.37579e+07	389287	985402	7.11362e+06	2.07304e+06	3.64035e+06	715965	522984	1.10364e+08	482197	1.11684e+06	401167	3.34237e+06	2.97084e+06	1.37292e+07	1.44244e+08	1.54301e+06	3.59938e+06	1.09992e+06	239104	482427	34812.8	59319.3	57103.5	1.23543e+06	186895	5.1663e+06	1.99047e+06	2.69296e+06	3.93253e+06	132234	1.46715e+06	269079	341909	430167
CS30442.	SPRINGAD21_1	SpringAdults				709104	3.44822e+06	1.34312e+08	4.03838e+07	88769.7	64321.3	741516	479476	2.13393e+07	1.70103e+07	753962	548883	9.03489e+06	2.59492e+06	260241	978622	687351	1.00598e+08	502161	699047	727415	3.80381e+06	2.47214e+06	1.48652e+07	1.46904e+08	1.48404e+06	5.92348e+06	984611	469114	636701	792483	363401	349826	4.53676e+06	367732	5.59612e+06	811791	1.88731e+06	4.55243e+06	420482	1.66903e+06	299200	833949	1.06947e+06
CS30443.	SPRINGAD21_2	SpringAdults				1.36015e+06	2.4183e+06	1.318e+08	3.8245e+07	97399.5	55102.9	880581	422947	2.8502e+07	1.98616e+07	596669	600759	9.7448e+06	2.77152e+06	2.83083e+06	1.09499e+06	799764	9.6401e+07	544525	1.03571e+06	716452	3.53608e+06	2.67094e+06	1.80018e+07	1.49506e+08	1.71807e+06	6.47674e+06	1.16506e+06	622929	788365	66255.6	74745.9	71953.9	2.49805e+06	261670	6.55383e+06	3.60192e+06	1.6359e+06	4.12542e+06	400631	1.85433e+06	317883	776276	1.16621e+06
CS30444.	SPRINGAD21_3	SpringAdults				975427	1.60646e+06	1.39034e+08	4.06692e+07	82517.5	43389	1.43261e+06	361315	3.10618e+07	1.49155e+07	624098	802598	1.22053e+07	2.86442e+06	2.01191e+06	912218	1.02397e+06	9.66778e+07	373744	809054	787477	2.97133e+06	3.22647e+06	1.76292e+07	1.45917e+08	1.44566e+06	4.19088e+06	1.02804e+06	368604	562532	38193.6	68744.3	66176.5	1.89619e+06	296912	5.51918e+06	1.9152e+06	1.51827e+06	3.71188e+06	177529	1.78356e+06	211155	768714	1.90243e+06
CS32290.	SPRINGAD21_4	SpringAdults				963756	3.0577e+06	1.09083e+08	4.00418e+07	86787.1	51717.8	733482	343116	2.82218e+07	1.70627e+07	948862	660530	5.99688e+06	1.78754e+06	3.22545e+06	1.10339e+06	464670	7.93321e+07	429772	869216	625319	4.356e+06	2.58392e+06	1.31111e+07	1.47101e+08	1.64192e+06	5.96383e+06	1.03957e+06	566719	794412	1.03087e+06	118561	114133	2.57998e+06	193113	5.94565e+06	2.61181e+06	3.14708e+06	5.01267e+06	1.14362e+06	1.29485e+06	259468	811694	962497
CS32291.	SPRINGAD21_5	SpringAdults				771209	3.13147e+06	1.08394e+08	4.08151e+07	73808	42626.3	544703	328340	3.20136e+07	1.37266e+07	569962	810570	8.37201e+06	2.17818e+06	2.32446e+06	895676	630229	7.43254e+07	287583	532860	606309	3.50898e+06	5.29379e+06	1.74666e+07	1.47201e+08	1.45203e+06	4.05314e+06	1.01929e+06	264790	749873	987707	94813.1	91271.5	1.93722e+06	204001	3.88449e+06	2.30558e+06	1.78813e+06	4.15071e+06	493030	1.45113e+06	178497	946941	983692
CS32292.	SUMAD21_1	SummerAdults				1.3144e+06	1.50646e+06	1.12596e+08	4.34613e+07	107072	67226.2	984722	433827	4.43572e+07	2.08721e+07	477362	1.06244e+06	8.66994e+06	2.46687e+06	3.01406e+06	967502	678529	7.98813e+07	628527	1.91165e+06	706182	2.67891e+06	2.44027e+06	1.34274e+07	1.57293e+08	1.73492e+06	6.3722e+06	1.10264e+06	607052	1.06136e+06	26253.7	184609	177713	3.57884e+06	148823	2.28729e+06	3.74874e+06	1.14643e+06	3.12586e+06	241043	1.62527e+06	355148	986103	1.94006e+06
CS32293.	SUMAD21_2	SummerAdults				1.04564e+06	3.20984e+06	1.42573e+08	4.22125e+07	72537.3	49559.8	617706	336734	1.96069e+07	1.74219e+07	1.71409e+06	513259	5.75397e+06	1.706e+06	3.09872e+06	1.24296e+06	405133	1.11381e+08	610855	1.07044e+06	593245	4.16648e+06	5.93578e+06	1.84952e+07	1.48084e+08	1.69609e+06	5.07566e+06	1.13832e+06	342862	973798	36731.1	63107.5	60750.2	1.89748e+06	385885	5.88752e+06	2.87326e+06	560155	4.72006e+06	121373	1.29456e+06	291806	972684	3.36154e+06
CS32294.	SUMAD21_3	SummerAdults				1.28638e+06	1.57187e+06	1.4e+08	4.11371e+07	99917.1	49235.5	1.07016e+06	127369	2.94448e+07	1.65795e+07	1.73682e+06	715546	6.10903e+06	1.63793e+06	2.61044e+06	921404	433881	1.08132e+08	460394	1.36805e+06	1.00069e+06	3.02327e+06	3.40082e+06	2.39924e+07	1.4351e+08	1.47691e+06	4.87571e+06	1.02568e+06	240247	744426	628303	85370.9	82182	2.00028e+06	128662	5.85155e+06	2.70943e+06	1.84197e+06	3.53218e+06	290500	1.2142e+06	326599	756856	433508
CS32295.	SUMAD21_4	SummerAdults				1.20368e+06	1.11572e+06	1.55433e+08	4.52257e+07	110408	60681	1.35442e+06	453653	4.42877e+07	1.41906e+07	889654	1.17417e+06	8.64139e+06	2.41675e+06	2.97994e+06	781475	655794	1.18046e+08	618656	1.62139e+06	752681	2.33955e+06	1.6543e+06	1.10771e+07	1.58711e+08	1.79044e+06	3.83663e+06	1.25018e+06	478702	790921	46626.3	140207	134970	1.80308e+06	268683	7.24572e+06	2.09643e+06	1.11476e+06	2.719e+06	73620.8	1.59874e+06	336176	527411	2.34806e+06
CS32591.	SUMAD21_5	SummerAdults				1.27891e+06	2.43008e+06	1.02788e+08	3.68393e+07	100601	56201.1	758140	281856	3.52619e+07	2.01252e+07	721130	761942	9.97152e+06	2.49019e+06	3.12876e+06	1.11898e+06	803670	6.75819e+07	668881	1.30531e+06	535073	3.59165e+06	1.31408e+06	1.88596e+07	1.37536e+08	1.46891e+06	5.56512e+06	1.00427e+06	507290	702933	794090	113739	109491	1.9303e+06	152640	7.05088e+06	1.73468e+06	1.48299e+06	4.35091e+06	243665	1.54689e+06	340661	753909	5.54252e+06
[truncated: 1,941 more columns]
