# Supplementary material for: Dynamic metabolic and molecular changes during seasonal shrinking in Sorex araneus
Source: HighWire-hosted journal article supplement (doi:10.1101/gr.280639.125), 2025-11-04
Supplement: Supplemental_Data.zip [file Supplemental_Data_S3.xlsx]

## Sheet: Supplemental_Data_3
Metabolite	F.stat	p.value	-LOG10(p)	FDR
Butorphanol	349.27	1.693e-17	16.771	4.2326e-15
8-Hydroxyquinoline	23.421	4.0255e-07	6.3952	5.0319e-05
Thymidine	19.511	1.6163e-06	5.7915	0.00013469
Cystine	12.901	3.0496e-05	4.5158	0.001906
3-(2,7-dimethylpyrazolo[1,5-a]pyrimidin-6-yl)-5-(trifluoromethyl)-4,5-dihydro-1H-pyrazol-5-ol	12.36	4.0573e-05	4.3918	0.0020286
Kynurenic acid	9.4356	0.00022412	3.6495	0.0093383
Glutathione disulfide	9.1901	0.00026253	3.5808	0.0093761
N-Acetyl-ornithine	8.8245	0.00033387	3.4764	0.010434
Acetyl-_-methylcholine.1	8.3421	0.00046279	3.3346	0.012855
Adipic acid	7.5764	0.0007955	3.0994	0.018612
Carnitine	7.5365	0.00081895	3.0867	0.018612
Methyprylon	7.1882	0.0010594	2.9749	0.022071
2-Ethylhexyl sulfate	6.9713	0.0012478	2.9039	0.022506
Rhamnose	6.9582	0.0012603	2.8995	0.022506
Ethyl palmitoleate	6.787	0.0014371	2.8425	0.023952
L-Tyrosine methyl ester	6.5891	0.0016764	2.7756	0.026194
Asparagine	6.2033	0.0022791	2.6422	0.033516
Galactonic acid	6.0531	0.0025751	2.5892	0.034665
_-Gluconolactone	6.0253	0.0026345	2.5793	0.034665
Docosahexanoic acid	5.862	0.0030148	2.5207	0.036952
Arachidonic acid	5.7753	0.0032406	2.4894	0.036952
N-Acetyl-glutamine	5.7712	0.0032518	2.4879	0.036952
Serine	5.6214	0.0036894	2.433	0.040102
Quinoline.1	5.5034	0.0040794	2.3894	0.04214
N-Acetylneuraminic acid	5.4656	0.004214	2.3753	0.04214
Homoarginine	5.3914	0.0044919	2.3476	0.043191
Threonic acid	5.1719	0.00544	2.2644	0.048676
D-Alanine methyl ester	5.1694	0.0054518	2.2635	0.048676
Myristoylcarnitine	5.0623	0.0059936	2.2223	0.050128
Hexanoyl Glycine	5.0583	0.0060154	2.2207	0.050128
Allopurinol	4.7338	0.0080595	2.0937	0.064492
Perfluoro-1-octanesulfonic acid (PFOS)	4.6567	0.0086499	2.063	0.064492
4-Indolecarbaldehyde	4.6541	0.0086707	2.0619	0.064492
alpha-Linolenic acid	4.6417	0.0087709	2.057	0.064492
Inosine	4.5378	0.0096561	2.0152	0.068364
5-Hydroxytryptophan	4.5171	0.0098445	2.0068	0.068364
Acetyl-_-methylcholine	4.3872	0.011118	1.954	0.075125
Glycolic acid	4.3244	0.011799	1.9282	0.077101
Cortisone	4.3041	0.012028	1.9198	0.077101
3-Hydroxybutyric acid	4.2379	0.01281	1.8924	0.080064
Docosapentaenoic acid	4.1217	0.014323	1.844	0.08698
Glyceric acid	4.0918	0.014742	1.8314	0.08698
N,N-Diethylethanolamine.1	4.0766	0.014961	1.8251	0.08698
N8-Acetylspermidine	3.9715	0.016571	1.7806	0.092902
L-Ascorbic acid 2-sulfate	3.9623	0.016722	1.7767	0.092902
Traumatic acid	3.748	0.020665	1.6848	0.11048
N-Acetyl-aspartic acid	3.7429	0.020771	1.6825	0.11048
Quinic acid	3.6345	0.023156	1.6353	0.1206
2'-Deoxyuridine	3.6003	0.023968	1.6204	0.12229
N-Acetylputrescine	3.4816	0.027041	1.568	0.13233
Thiamine	3.4703	0.027355	1.563	0.13233
N-Acetyl-tryptophan	3.4595	0.02766	1.5582	0.13233
Corticosterone	3.4456	0.028055	1.552	0.13233
N-Benzylformamide	3.4175	0.028877	1.5394	0.13276
Dimethyl cyclohexane-1,4-dicarboxylate	3.4064	0.029206	1.5345	0.13276
7-Methylguanine	3.2793	0.03331	1.4774	0.1474
Taurine	3.2708	0.033607	1.4736	0.1474
Acetylcholine	3.2534	0.03422	1.4657	0.1475
Phloroglucinol	3.2172	0.035538	1.4493	0.14827
Diaminopimelic acid	3.2101	0.035802	1.4461	0.14827
Hexose	3.2001	0.036177	1.4416	0.14827
1-Methyladenine	3.1501	0.038129	1.4187	0.15178
Citric acid	3.1412	0.038487	1.4147	0.15178
Threonine	3.1321	0.038856	1.4105	0.15178
Alanine	3.1029	0.04007	1.3972	0.15274
DL-Stachydrine.1	3.0779	0.041143	1.3857	0.15274
2,4-dihydroxyheptadec-16-en-1-yl acetate	3.0771	0.041181	1.3853	0.15274
Tetradecanedioic acid	3.0574	0.042046	1.3763	0.15274
Leucine	3.049	0.042426	1.3724	0.15274
Deoxyinosine	3.0218	0.043666	1.3599	0.15274
Isoleucine	3.0089	0.044269	1.3539	0.15274
Pentose	3.0059	0.044414	1.3525	0.15274
Glycine	3.0019	0.044599	1.3507	0.15274
Anthranilic acid	2.9832	0.045501	1.342	0.15355
Suberic acid	2.9716	0.046066	1.3366	0.15355
Dimethyl 2,6-dimethyl-4-(2-thienyl)pyridine-3,5-dicarboxylate	2.9294	0.048192	1.317	0.15853
Pipecolinic acid	2.8651	0.05164	1.287	0.16766
Phenylalanine	2.8469	0.052665	1.2785	0.1688
Guanosine	2.8344	0.053377	1.2726	0.16891
Glutaric acid	2.8057	0.055061	1.2592	0.17128
Valine	2.796	0.055645	1.2546	0.17128
N1-(1,3,5-Trimethyl-1H-pyrazol-4-yl)-2-cyano-3-(dimethylamino)acrylamide	2.7834	0.056406	1.2487	0.17128
Glutamine	2.776	0.056865	1.2452	0.17128
DL-4-Hydroxyphenyllactic acid	2.7637	0.057627	1.2394	0.17151
4'-Methoxyacetophenone	2.7513	0.058408	1.2335	0.17179
_-aminobutyric acid	2.7192	0.060486	1.2183	0.17406
Trimethylamine N-Oxide	2.7179	0.060572	1.2177	0.17406
Putrescine	2.6619	0.064395	1.1911	0.18126
Methionine	2.6601	0.064529	1.1902	0.18126
1-Linoleoyl glycerol	2.6386	0.066062	1.1801	0.1835
Cytidine	2.6135	0.067911	1.1681	0.1835
Hexadecanedioic acid	2.6055	0.068516	1.1642	0.1835
N-Formylmethionine	2.5853	0.070055	1.1546	0.1835
Oleoyl ethanolamide	2.577	0.070696	1.1506	0.1835
Monoolein	2.5697	0.071268	1.1471	0.1835
4-Hydroxybenzaldehyde	2.5601	0.072028	1.1425	0.1835
Glutamic acid	2.5566	0.072309	1.1408	0.1835
Urea	2.5547	0.072457	1.1399	0.1835
2-(acetylamino)-3-[4-(acetylamino)phenyl]acrylic acid	2.5521	0.072667	1.1387	0.1835
Eicosapentaenoic acid	2.5232	0.075028	1.1248	0.18757
Ethyl vanillin	2.5113	0.076027	1.119	0.18819
Linoleoyl Ethanolamide	2.4989	0.077082	1.113	0.18893
5-Nitro-o-toluidine	2.4799	0.078718	1.1039	0.19106
3-Methylhistidine	2.3884	0.087178	1.0596	0.20956
AMP	2.3643	0.089562	1.0479	0.21231
Crotonic acid.1	2.3538	0.090624	1.0428	0.21231
GMP	2.338	0.092245	1.0351	0.21231
3-Methylglutaconic acid	2.3355	0.092502	1.0338	0.21231
Vanillin	2.3349	0.092565	1.0336	0.21231
Nicotine amide	2.3027	0.095978	1.0178	0.21813
N-(2-Methoxyethyl)-3-{5-[(2S)-1-methyl-2-pyrrolidinyl]-1,2,4-oxadiazol-3-yl}-2-pyridinamine	2.2844	0.097982	1.0089	0.22068
3-(tert-Butyl)-1-(2,4-dichlorobenzyl)-N-isopropyl-1H-pyrazole-5-carboxamide	2.2643	0.10023	0.999	0.22373
3-benzyl-4-hydroxy-5-(4-hydroxyphenyl)-2,5-dihydrofuran-2-one	2.2543	0.10137	0.99411	0.22426
(R)-3-Hydroxy myristic acid	2.2445	0.10249	0.98931	0.22469
Tyrosine	2.2371	0.10336	0.98567	0.22469
Fumaric acid	2.223	0.10502	0.97874	0.22471
Crotonic acid	2.2217	0.10517	0.97812	0.22471
Ethyl palmitoleate.1	2.1755	0.11083	0.95536	0.2348
trans,trans-2,4-Heptadienal	2.1659	0.11204	0.95061	0.23502
Pyridoxamine 5-phosphate	2.1599	0.11281	0.94766	0.23502
1-Methyl Adenosine	2.1393	0.11549	0.93746	0.23827
Uric acid	2.1333	0.11628	0.93451	0.23827
N-Acetyltyramine	2.1177	0.11836	0.9268	0.23956
2-Hydroxyisocaproic acid	2.114	0.11885	0.92498	0.23956
DL-Metanephrine	2.1072	0.11978	0.92162	0.23956
3-Hydroxy-2-methyl-4-pyrone	2.0747	0.12432	0.90546	0.24667
Hexose dimer	1.9764	0.13914	0.85654	0.27299
Perillartine	1.9725	0.13977	0.85459	0.27299
5-acetyl-2,6-dimethyl-1,2,3,4-tetrahydropyridin-4-one	1.955	0.1426	0.84589	0.27635
Indole-3-acetic acid	1.9357	0.14581	0.8362	0.28041
3-Ureidopropionic acid	1.9229	0.14797	0.82982	0.28239
2,3-dihydroxypropyl 12-methyltridecanoate	1.8873	0.15418	0.81197	0.28988
1,3-Diaminopropane	1.881	0.15531	0.80879	0.28988
N-Acetyl-phenylalanine	1.8751	0.15636	0.80587	0.28988
3-(4-benzylpiperazino)pyrazine-2-carbonitrile	1.8713	0.15705	0.80397	0.28988
N-Acetyl-alanine	1.8678	0.15769	0.80218	0.28988
6-(4-methoxyphenyl)pyrimidine-2,4-diamine	1.8554	0.15997	0.79595	0.29061
2-Fluoro-6-(4-methoxyphenoxy)benzonitrile	1.853	0.16042	0.79475	0.29061
5-Methylcytosine	1.8269	0.16532	0.78167	0.29221
3-Methyladipic/pimelic acid	1.8204	0.16658	0.77837	0.29221
Tris(2-butoxyethyl) phosphate	1.8195	0.16674	0.77795	0.29221
2,4-Dimethylbenzaldehyde	1.8182	0.16701	0.77725	0.29221
3-Phenyllactic acid	1.8175	0.16714	0.77691	0.29221
2-Hydroxybutyric acid	1.7803	0.1745	0.75821	0.30241
Palmitoleic acid	1.7759	0.1754	0.75597	0.30241
6-Methyl[1,2,4]triazolo[4,3-b]pyridazin-8-ol	1.7666	0.17729	0.75131	0.30279
PEG n7	1.763	0.17804	0.74948	0.30279
Nor-9-carboxy-_9-THC	1.6896	0.1939	0.71241	0.32754
Indole-3-lactic acid	1.6672	0.19903	0.70108	0.33394
Hexanoylcarnitine	1.6521	0.20256	0.69345	0.33751
Buprenorphine	1.6466	0.20386	0.69067	0.33751
Proline	1.6279	0.20834	0.68123	0.34267
Pantothenic acid	1.6203	0.21019	0.67739	0.34345
2-Hydroxyoctanoic acid	1.5822	0.21974	0.65809	0.35672
Lysine	1.5647	0.22428	0.64922	0.36173
Hypoxanthine	1.5553	0.22675	0.64445	0.36339
Ribulose-5-phosphate	1.5453	0.22943	0.63936	0.36533
PEG n8	1.5371	0.23163	0.63521	0.3665
Linoleic acid	1.5056	0.24029	0.61926	0.37782
Monoolein.2	1.4682	0.25104	0.60025	0.39225
UMP	1.4339	0.26128	0.58289	0.40571
Methionine sulfoxide	1.3826	0.27742	0.55687	0.42811
N6,N6,N6-Trimethyl-L-lysine	1.3618	0.28425	0.5463	0.43597
9-Oxo-ODE	1.3564	0.28603	0.54358	0.43603
12(S)-HETE	1.3432	0.29047	0.5369	0.43816
Creatinine	1.3418	0.29094	0.5362	0.43816
Noroxycodone-d3	1.3238	0.29713	0.52706	0.4448
PEG n12	1.3122	0.30115	0.52122	0.44814
3-Methoxybenzaldehyde	1.2782	0.31332	0.50402	0.46349
Carnosine	1.2723	0.31547	0.50104	0.46357
Creatine	1.268	0.31708	0.49883	0.46357
Mevalonolactone	1.2624	0.31913	0.49604	0.46385
PEG n6	1.2438	0.32612	0.48663	0.46707
Nicotinuric acid.1	1.2421	0.32676	0.48577	0.46707
IMP	1.2416	0.32695	0.48552	0.46707
Urocanic acid	1.2138	0.33767	0.4715	0.47965
Hippuric acid	1.1972	0.34423	0.46315	0.4862
3-Methyl-2-oxovaleric acid	1.181	0.35076	0.45499	0.49232
Cetrimonium	1.1757	0.35293	0.45231	0.49232
2-Oxoglutaric acid	1.1719	0.35447	0.45042	0.49232
Dodecanedioic acid	1.1305	0.37187	0.42961	0.51363
Tryptamine	1.1194	0.37663	0.42409	0.51722
3-Hydroxydecanoic acid	1.1116	0.38003	0.42018	0.51722
N-Acetyl-methionine	1.1102	0.38067	0.41945	0.51722
3-[2-morpholino-5-(trifluoromethyl)phenyl]-4-phenyl-2,3-dihydro-1,3-thiazol-2-imine hydrochloride	1.0921	0.38869	0.4104	0.52526
Monoolein.1	1.0787	0.39472	0.40371	0.53054
2-[(1S)-1-Hydroxyethyl]-4(1H)-quinazolinone	1.0643	0.40128	0.39655	0.53412
Arginine	1.0635	0.40166	0.39614	0.53412
N,N-dimethyl-N'-[2-(5-oxo-4,5-dihydro-1H-pyrazol-4-yl)phenyl]iminoformamide	1.0419	0.41173	0.38539	0.54461
Vindoline	1.014	0.42506	0.37155	0.55928
3-Chloro-Tyrosine	0.98514	0.43922	0.35732	0.5722
Uracil	0.98467	0.43945	0.35709	0.5722
Tryptophan	0.96056	0.45162	0.34523	0.58474
8-Aminooctanoic acid	0.95639	0.45375	0.34318	0.58474
6-Methyl-2-pyridinemethanol	0.94239	0.46099	0.33631	0.58964
9-Oxo-10(E),12(E)-octadecadienoic acid	0.93991	0.46228	0.3351	0.58964
Acetophenone	0.92474	0.47024	0.32768	0.59675
N-Iso valerylglycine	0.91704	0.47432	0.32393	0.59889
1,2-dihydroxyheptadec-16-yn-4-yl acetate	0.88246	0.49304	0.30712	0.61434
Allantoin	0.8815	0.49356	0.30666	0.61434
Diethyleneglycol diacetate	0.88083	0.49393	0.30633	0.61434
2-Anisidine	0.83028	0.5224	0.282	0.64654
Cotinine	0.81569	0.53085	0.27503	0.65376
Xanthine	0.80897	0.53478	0.27182	0.65537
Dulcitol/Mannitol/Sorbitol	0.79978	0.54019	0.26746	0.65663
Pyroquilon	0.79355	0.54387	0.2645	0.65663
Quinoline	0.78959	0.54623	0.26262	0.65663
N,N-Diethylethanolamine	0.78509	0.54892	0.26049	0.65663
N-Methyloctan-1-amine	0.78505	0.54894	0.26048	0.65663
Citrulline	0.76757	0.55946	0.25223	0.66602
Tauro-a-Muricholic acid	0.75336	0.56812	0.24556	0.66995
Tauro-b-Muricholic acid	0.75336	0.56812	0.24556	0.66995
2-Aminoadipic acid	0.74318	0.57438	0.2408	0.67382
Histidine	0.73727	0.57804	0.23804	0.67382
mesityl (4-methylphenyl) sulfone	0.73495	0.57948	0.23696	0.67382
5-Hydroxyindole-3-acetic acid	0.72594	0.58509	0.23278	0.67719
3-(tert-butyl)-1-methyl-4,5-dihydro-1H-pyrazol-5-one	0.71815	0.58998	0.22916	0.6797
Sphingosine 1-phosphate	0.71275	0.59338	0.22667	0.68048
3-Hydroxy-2-methylpyridine	0.70312	0.59948	0.22222	0.68434
Thromboxane B2	0.68598	0.61044	0.21436	0.69194
Indan-1-one 1-(4,5-dihydro-1H-imidazol-2-yl)hydrazone	0.68406	0.61167	0.21348	0.69194
4-Hydroxyproline	0.67269	0.61902	0.20829	0.6971
4-Ethynylaniline	0.64899	0.6345	0.19757	0.71132
Lactic acid	0.61228	0.6589	0.18118	0.7352
4,4'-Bipyridine	0.60815	0.66168	0.17935	0.7352
6-Methylquinoline	0.59355	0.67154	0.17293	0.74285
1H-indene-3-carboxamide	0.57808	0.68205	0.16618	0.75116
2-Hydroxyphenylacetic acid	0.54921	0.70186	0.15375	0.76958
Hypoglycin A	0.53988	0.70831	0.14978	0.77327
GNH	0.5084	0.7302	0.13656	0.79369
Succinic acid	0.50255	0.73428	0.13414	0.79468
DL-Stachydrine	0.47552	0.75322	0.12308	0.81166
NP-005614	0.45896	0.76485	0.11643	0.82028
Isethionic acid	0.45478	0.76778	0.11476	0.82028
4-Piperidone	0.44669	0.77346	0.11156	0.82283
Sebacic acid	0.42818	0.78646	0.10432	0.83312
2-Ethylhydracrylic/2-(hydroxymethyl)butanoi acid	0.38541	0.81635	0.088123	0.86113
cis-Aconitic acid	0.38039	0.81983	0.086274	0.86117
Pyruvic acid	0.35849	0.83495	0.078341	0.87338
_-Hydroxynorfentanyl	0.33002	0.85432	0.068379	0.88992
Pyroglutamic acid	0.30662	0.86994	0.060513	0.89827
Tranexamic acid	0.30329	0.87213	0.059417	0.89827
Sugar alcohol	0.3018	0.87311	0.058929	0.89827
Epinephrine	0.26816	0.89479	0.04828	0.91679
Nicotinuric acid	0.24887	0.90677	0.042503	0.92527
Uridine	0.22374	0.92179	0.03537	0.93549
N-Acetyl-glycine	0.21947	0.92426	0.034206	0.93549
Isocitric acid	0.20425	0.93289	0.030169	0.93693
4-Methyl-2-oxovaleric acid	0.20373	0.93318	0.030033	0.93693
Nicotinic acid	0.06328	0.992	0.0034889	0.992
