# Supplementary material for: Dynamic metabolic and molecular changes during seasonal shrinking in Sorex araneus
Source: HighWire-hosted journal article supplement (doi:10.1101/gr.280639.125), 2025-11-04
Supplement: Supplemental_Data.zip [file Supplemental_Data_S4.xlsx]

## Sheet: LRT
Count	Gene	baseMean	log2FoldChange	lfcSE	stat	pvalue	padj
1	A1BG	56014.1	0.691496	0.238386	58.5493	2.42288e-11	1.67168e-09
2	A1CF	748.293	-0.189884	0.439388	16.8868	0.00471959	0.0189019
3	A2ML1	18.9421	0.996683	0.81695	6.61313	0.251038	0.373502
4	A3GALT2	0.755612	-0.0349448	2.63258	3.01511	0.697656	NA
5	A4GALT	9.16662	-0.367897	0.592554	2.85611	0.722158	0.789709
6	A4GNT	14.4006	1.87385	0.687883	17.9853	0.00296485	0.013203
7	AAAS	156.37	0.262856	0.170405	9.17538	0.10227	0.193353
8	AACS	487.733	-1.25307	0.410816	43.004	3.68823e-08	1.15419e-06
9	AADAC	1025.74	-0.110214	0.342336	9.65693	0.0855604	0.168894
10	AADAT	2851.44	0.0996889	0.186675	29.3068	2.01852e-05	0.000242343
11	AAGAB	552.74	0.0530431	0.151719	0.521016	0.991334	0.994426
12	AAK1	81.4447	0.0781101	0.241963	4.57984	0.469273	0.582748
13	AAMDC	126.079	0.00610779	0.182184	25.546	0.000109269	0.000958326
14	AAMP	1642.26	-0.0335203	0.120804	2.99258	0.70113	0.773212
15	AAR2	282.746	-0.207273	0.170944	11.4681	0.0428496	0.100591
16	AARS1	2303.01	-0.0728574	0.167568	7.93224	0.16001	0.270173
17	AARS2	376.962	0.194313	0.143495	16.0965	0.00657384	0.0243842
18	AARSD1	454.832	-0.0716987	0.195558	7.80504	0.167313	0.278814
19	AASDH	175.081	0.186203	0.190633	5.10236	0.403517	0.522442
20	AASDHPPT	1112.97	-0.337099	0.211577	11.0805	0.049807	0.112663
21	AASS	8148.32	-0.0492769	0.191846	2.65653	0.752758	0.814785
22	AATF	169.462	-0.287856	0.151561	25.2674	0.000123705	0.00105332
23	AATK	245.437	0.217462	0.19035	37.9381	3.88284e-07	8.81645e-06
24	ABAT	11924.4	0.522917	0.15025	20.9138	0.000840994	0.00483887
25	ABCA1	1491.8	-0.631409	0.280705	11.5906	0.0408499	0.0968578
26	ABCA12	0.0467088	-0.461967	5.30442	-0.84789	1	NA
27	ABCA13	0.751715	-0.260822	1.94417	1.44211	0.919652	NA
28	ABCA2	95.2554	0.629861	0.266584	31.4407	7.66563e-06	0.000111523
29	ABCA3	275.76	0.440223	0.188109	8.72375	0.120603	0.218927
30	ABCA4	2.1944	2.20612	1.25518	5.04839	0.410004	0.528269
31	ABCA5	237.044	-0.264802	0.300682	14.769	0.0113963	0.0369927
32	ABCA6	4308.04	-0.591318	0.211546	19.409	0.00161247	0.00817729
33	ABCA7	37.1901	0.238219	0.372996	3.48056	0.626331	0.714613
34	ABCA9	12.9538	-0.0500576	0.677666	11.5833	0.0409663	0.0970632
35	ABCB1	1287.78	-0.260362	0.250625	26.1728	8.26078e-05	0.00076322
36	ABCB10	725.746	0.172417	0.213257	11.025	0.0508873	0.114687
37	ABCB11	2467.48	0.0777818	0.224361	29.2033	2.11522e-05	0.000251325
38	ABCB5	0	NA	NA	NA	NA	NA
39	ABCB6	940.539	0.380556	0.188706	4.12976	0.530889	0.635636
40	ABCB7	962.08	0.227002	0.156288	17.4774	0.00367803	0.0156263
41	ABCB8	716.446	0.301526	0.196038	20.5189	0.000998304	0.00555127
42	ABCB9	1352.97	0.508939	0.225149	12.2755	0.0312014	0.0794153
43	ABCC1	55.995	-0.62054	0.392382	3.62555	0.604481	0.695956
44	ABCC10	267.872	-0.0108009	0.222515	16.8902	0.00471277	0.0188934
45	ABCC11	3.07452	1.79708	1.32634	19.8049	0.00135955	0.00711345
46	ABCC2	4687.37	0.0436159	0.180568	11.6815	0.0394226	0.094225
47	ABCC3	72.4214	0.898084	0.393394	15.7056	0.00773696	0.0275786
48	ABCC4	127.828	0.49537	0.307242	7.1436	0.210178	0.329063
49	ABCC5	345.836	-0.531542	0.275907	6.87436	0.230153	0.350984
50	ABCC6	3687.39	0.529575	0.198303	34.9364	1.54927e-06	2.81106e-05
51	ABCC8	10.0585	2.33196	0.7166	19.6493	0.00145393	0.00750244
52	ABCC9	62.6058	0.0253479	0.401201	16.3542	0.00590233	0.0224742
53	ABCD1	1032.11	0.244065	0.215562	9.37109	0.0951472	0.182812
54	ABCD2	80.2729	3.0164	0.680444	30.1065	1.40535e-05	0.000179875
55	ABCD4	623.377	0.0188428	0.215577	8.09078	0.151303	0.259506
56	ABCE1	1087.37	-0.173995	0.174271	14.8287	0.0111199	0.036334
57	ABCF1	1028.42	-0.267327	0.139704	4.16009	0.526605	0.632288
58	ABCF2	605.366	-0.0306018	0.130182	7.15372	0.209457	0.32835
59	ABCF3	911.889	-0.166237	0.110344	6.68769	0.244923	0.366656
60	ABCG1	161.594	0.139329	0.312368	16.317	0.00599505	0.0227328
61	ABCG2	1699.28	-1.78251	0.26673	107.577	1.33162e-21	4.3688e-19
62	ABCG4	14.9697	0.117406	0.444204	4.51191	0.478292	0.590509
63	ABCG5	482.293	-0.0579904	0.279255	0.199302	0.999121	0.999494
64	ABCG8	865.836	-0.124456	0.283973	10.3267	0.0664908	0.140405
65	ABHD1	0.0814929	0.980684	5.30442	-0.288708	1	NA
66	ABHD10	99.608	0.477789	0.275439	9.81352	0.0806947	0.161732
67	ABHD11	513.647	-0.050659	0.186664	7.80143	0.167524	0.27908
68	ABHD12	573.3	0.426859	0.223239	15.9315	0.0070425	0.0257917
69	ABHD12B	36.9544	-0.439889	0.364838	26.4455	7.31253e-05	0.000687463
70	ABHD13	479.685	-0.108758	0.189586	19.3912	0.00162485	0.00822453
71	ABHD14A	232.591	0.451027	0.191071	13.4958	0.0191504	0.0551824
72	ABHD14B	4857.43	0.588677	0.17113	34.4294	1.9554e-06	3.47348e-05
73	ABHD15	212.508	-0.133679	0.286852	17.703	0.0033426	0.0144567
74	ABHD16A	941.451	-0.162374	0.133263	6.93768	0.225317	0.345728
75	ABHD16B	0.713271	-1.1694	2.16507	1.73233	0.884802	NA
76	ABHD17A	1932.19	0.261965	0.203783	28.2879	3.19732e-05	0.000348712
77	ABHD17B	93.1469	-0.0624808	0.289438	38.2054	3.43126e-07	7.91404e-06
78	ABHD17C	25.6178	-0.361113	0.408858	14.2256	0.0142381	0.043944
79	ABHD18	2759.62	0.109163	0.13025	36.2775	8.35806e-07	1.65677e-05
80	ABHD2	1525.93	1.51055	0.324199	46.1329	8.53334e-09	3.23543e-07
81	ABHD3	3785.08	-0.22304	0.235904	17.1297	0.00426019	0.0174533
82	ABHD4	1424.73	-0.167345	0.196257	3.6334	0.603305	0.695
83	ABHD5	202.309	0.845786	0.345424	12.3379	0.0304401	0.0779477
84	ABHD6	1562.23	0.0821158	0.234469	8.14615	0.148363	0.255636
85	ABHD8	89.5439	0.083449	0.212574	16.3774	0.00584527	0.0222938
86	ABI1	681.952	-0.217877	0.202671	20.354	0.00107225	0.00587509
87	ABI2	187.151	0.0458126	0.203048	9.36739	0.0952774	0.182995
88	ABI3	31.2113	-0.270364	0.379217	6.87797	0.229875	0.350747
89	ABI3BP	90.429	-0.779216	0.459672	6.54483	0.256751	0.379857
90	ABITRAM	194.237	0.172303	0.172454	2.94201	0.708925	0.77915
91	ABL1	436.095	0.430122	0.222165	6.99376	0.221104	0.341419
92	ABL2	329.975	-0.196667	0.165623	4.20426	0.520397	0.627271
93	ABLIM1	549.144	0.365498	0.247679	11.3704	0.0445103	0.103418
94	ABLIM2	108.222	1.41535	0.199357	79.5398	1.04744e-15	1.73595e-13
95	ABLIM3	2255.93	-0.779982	0.236807	22.7542	0.000376108	0.00253089
96	ABR	533.967	-0.125564	0.183076	21.3325	0.000700849	0.00420248
97	ABRA	84.6583	-0.343758	0.545641	21.6945	0.000598428	0.0036916
98	ABRACL	33.7175	-0.632914	0.450208	4.79085	0.441934	0.55789
99	ABRAXAS1	36.7037	-0.282573	0.329425	4.10711	0.5341	0.637952
100	ABRAXAS2	305.275	0.0195903	0.192289	7.649	0.176671	0.289398
101	ABT1	763.874	0.154424	0.173063	7.02279	0.218951	0.339328
102	ABTB1	527.704	0.10524	0.249749	10.7888	0.0557323	0.122885
103	ABTB2	670.418	-0.583292	0.251491	14.0881	0.0150594	0.0459033
104	ABTB3	26.0253	0.309522	0.514679	8.23582	0.143709	0.249381
105	ACAA1	9217.21	0.0523375	0.210632	12.0128	0.0346126	0.0857236
106	ACAA2	8000.32	0.53888	0.15061	34.2844	2.08987e-06	3.65398e-05
107	ACACA	302.627	0.234712	0.24783	4.74867	0.447316	0.562528
108	ACACB	3752.72	-0.356783	0.220601	10.1691	0.070583	0.146696
109	ACAD10	2157.13	0.274854	0.210463	6.32235	0.276104	0.398881
110	ACAD11	572.265	-0.583867	0.29241	32.5767	4.56659e-06	7.18321e-05
111	ACAD8	562.025	0.649649	0.176695	23.6708	0.000251132	0.00185703
112	ACAD9	1760.46	-0.422249	0.209263	22.1562	0.000488988	0.00315069
113	ACADL	2691.03	0.288677	0.189335	9.86763	0.079074	0.159377
114	ACADM	6020.27	0.110401	0.19284	22.8938	0.000353717	0.0024054
115	ACADS	1634.38	0.118935	0.211608	7.35318	0.195671	0.312095
116	ACADSB	1438.65	0.506185	0.26702	7.16039	0.208983	0.32783
117	ACADVL	16772	0.217024	0.118168	32.2414	5.3218e-06	8.14018e-05
118	ACAN	0.979821	1.25437	1.65803	5.94717	0.311393	NA
119	ACAP1	255.529	-0.0119097	0.225074	5.94967	0.311148	0.43361
120	ACAP2	274.774	-0.203451	0.185604	13.3306	0.0204698	0.0580171
121	ACAP3	832.688	-0.588985	0.193651	26.8312	6.1527e-05	0.000599459
122	ACAT1	1400.41	-0.474345	0.216629	29.0934	2.22293e-05	0.000260226
123	ACBD3	413.562	-0.157457	0.129512	15.6117	0.00804458	0.0284087
124	ACBD4	706.51	0.573809	0.251116	17.9911	0.00295762	0.0131818
125	ACBD5	1755.14	0.16982	0.229068	10.9238	0.0529122	0.118059
126	ACBD6	169.833	-0.135264	0.305041	11.2017	0.0475245	0.10879
127	ACCS	5.83591	-0.516854	0.728626	3.53993	0.617354	0.70698
128	ACCSL	0	NA	NA	NA	NA	NA
129	ACD	102.551	0.262003	0.231066	13.377	0.020091	0.0572463
130	ACE	95.0499	1.55177	0.464637	15.4943	0.00844628	0.0295629
131	ACE2	0.814892	0.133147	2.13306	1.85667	0.8686	NA
132	ACER1	0	NA	NA	NA	NA	NA
133	ACER2	229.956	0.34365	0.288346	11.9462	0.0355331	0.0873708
134	ACER3	582.933	0.144311	0.275278	0.675181	0.984303	0.989535
135	ACHE	74.3245	-0.0151002	0.609269	22.2283	0.000473773	0.00306789
136	ACIN1	942.992	0.00734167	0.131198	6.99345	0.221128	0.341419
137	ACKR1	8.8029	-1.05499	0.64197	4.04182	0.543411	0.645763
138	ACKR2	10.7679	-0.984532	0.706018	3.54946	0.615918	0.705888
139	ACKR3	52.8986	-0.618375	0.328279	7.91773	0.160828	0.271071
140	ACKR4	11.9683	-0.0300825	0.576411	3.52091	0.620226	0.709561
141	ACLY	312.684	-0.744408	0.361328	35.6877	1.0967e-06	2.09887e-05
142	ACMSD	2399.27	-0.0819816	0.120666	25.2049	0.000127199	0.00107794
143	ACO1	5272.76	-0.168717	0.133016	4.96045	0.420726	0.538706
144	ACO2	6939.52	0.290441	0.155422	16.8855	0.00472209	0.0189025
145	ACOD1	0.47599	-0.593695	2.98869	2.2808	0.809082	NA
146	ACOT11	162.966	-0.320579	0.362193	23.1447	0.000316729	0.00220422
147	ACOT12	2223.13	-0.130593	0.218103	19.9171	0.00129531	0.00683827
148	ACOT13	731.589	-0.239924	0.126347	9.88987	0.0784166	0.158549
149	ACOT6	359.887	0.192931	0.252041	3.32885	0.649428	0.732749
150	ACOT7	186.164	0.823594	0.232356	71.7663	4.39417e-14	5.27169e-12
151	ACOT8	399.566	0.255645	0.228567	12.9903	0.0234698	0.0641777
152	ACOX1	20940.5	0.0880748	0.187594	31.953	6.06996e-06	9.16251e-05
153	ACOX2	7358.28	0.0215073	0.155032	3.43628	0.633051	0.719675
154	ACOX3	1701.24	0.0335007	0.194429	6.05742	0.300672	0.423117
155	ACOXL	1.18557	-0.470415	1.65786	2.1657	0.825774	NA
156	ACP1	431.127	0.200325	0.141323	10.2979	0.06722	0.141406
157	ACP2	315.244	0.0531447	0.17774	8.96327	0.110538	0.205009
158	ACP3	994.531	-0.0803929	0.294901	6.81484	0.234779	0.355971
159	ACP4	6.08356	1.09566	0.929435	1.49724	0.913389	0.937548
160	ACP5	1889.66	-0.910505	0.255144	30.6476	1.09942e-05	0.00014915
161	ACP6	285.434	1.52506	0.219257	110.617	3.03472e-22	1.06057e-19
162	ACP7	2.17898	-3.46911	1.45932	10.3882	0.0649551	0.137925
163	ACR	0.0371683	-0.17345	5.30442	-1.12283	1	NA
164	ACRBP	10.4206	3.63545	1.15831	18.3904	0.00249485	0.0116189
165	ACRV1	0	NA	NA	NA	NA	NA
166	ACSBG1	22.3361	0.816819	0.444295	25.3697	0.0001182	0.00101777
167	ACSF2	178.547	2.24821	1.01182	13.2968	0.0207509	0.0585454
168	ACSF3	677.809	0.0341539	0.228115	11.2595	0.0464715	0.107123
169	ACSL1	8562.87	-0.1067	0.209392	15.4569	0.00857833	0.0299338
170	ACSL3	284.208	-0.470706	0.18235	20.3164	0.0010899	0.00595958
171	ACSL4	2518.37	-1.16056	0.584578	20.1573	0.00116755	0.00630911
172	ACSL5	11695.5	0.209158	0.166285	7.60346	0.179487	0.292765
173	ACSL6	47.652	0.750333	0.396419	19.7021	0.0014212	0.00737006
174	ACSM1	4952.59	1.72933	0.279902	70.3251	8.76949e-14	9.72264e-12
175	ACSM3	342.341	1.26801	0.349534	26.3892	7.49873e-05	0.000703323
176	ACSM4	0.126562	-0.519678	5.30442	0.0270734	0.999994	NA
177	ACSM5	5392.17	0.00543367	0.301778	2.21853	0.818154	0.865987
178	ACSM6	0.149938	0.980664	5.30442	0.119601	0.999748	NA
179	ACSS1	3058.1	0.127534	0.211348	1.42512	0.921546	0.943616
180	ACSS2	154.589	0.219409	0.283617	6.49138	0.261296	0.384107
181	ACSS3	2393.74	0.84548	0.247804	32.8558	4.01989e-06	6.46885e-05
182	ACTA1	507.093	1.77649	0.773585	5.22676	0.388837	0.509408
183	ACTA2	110.443	0.343546	0.811813	13.3589	NA	NA
184	ACTB	17004	-0.0274469	0.139784	11.4511	0.0431345	0.101054
185	ACTBL2	0.179152	0.51921	5.29855	0.955204	0.966097	NA
186	ACTC1	361.578	3.09187	0.632885	43.3297	3.16803e-08	1.01655e-06
187	ACTG1	742.86	0.355	0.282818	13.2826	0.0208699	0.058778
188	ACTG2	23.4853	-2.7613	1.2824	24.7514	NA	NA
189	ACTL10	0.705285	0.323253	1.95258	2.46488	0.781775	NA
190	ACTL6A	220.054	-0.13281	0.145417	15.5831	0.008141	0.0286629
191	ACTL6B	6.61198	0.524378	0.674718	5.60597	0.346465	0.468521
192	ACTL7A	0	NA	NA	NA	NA	NA
193	ACTL7B	0	NA	NA	NA	NA	NA
194	ACTL8	0.0439956	-0.519658	5.30442	-0.956578	1	NA
195	ACTL9	0	NA	NA	NA	NA	NA
196	ACTMAP	108.365	-0.0588375	0.340484	3.88059	0.566733	0.665459
197	ACTN1	106.798	-0.373174	0.358434	6.8062	0.235457	0.356658
198	ACTN2	161.604	2.42286	0.35102	67.1868	3.94055e-13	3.98417e-11
199	ACTN3	7.81604	1.84524	1.04955	2.74809	0.738754	0.802989
200	ACTN4	2348.26	0.110993	0.0943266	28.6717	2.68924e-05	0.000303597
201	ACTR10	371.103	-0.333588	0.165218	15.7859	0.00748268	0.0269553
202	ACTR1A	791.433	0.249133	0.133253	9.92639	0.0773479	0.156822
203	ACTR1B	1094.37	0.12766	0.176322	48.6433	2.62479e-09	1.14353e-07
204	ACTR2	876.141	-0.232038	0.182992	16.3379	0.00594281	0.0225588
205	ACTR3	1273.29	-0.161914	0.190149	18.8648	0.00203679	0.00984172
206	ACTR5	162.136	0.141433	0.19466	3.98431	0.551677	0.652738
207	ACTR6	155.791	-0.134703	0.258119	3.78234	0.58116	0.676867
208	ACTR8	279.653	-0.0311977	0.144811	30.4908	1.18053e-05	0.000156715
209	ACTRT2	0	NA	NA	NA	NA	NA
210	ACTRT3	7.78275	-0.139821	0.671506	4.59083	0.467823	0.581379
211	ACVR1	201.614	-0.166229	0.266607	11.2815	0.0460751	0.106383
212	ACVR1B	694.279	-0.0891907	0.156669	15.1205	0.00985962	0.033306
213	ACVR1C	105.418	0.540418	0.36404	11.6666	0.039653	0.0946492
214	ACVR2A	164.831	0.286657	0.219627	12.9758	0.0236068	0.0644099
215	ACVR2B	3.98191	0.297591	0.872574	5.89781	0.316289	0.438943
216	ACVRL1	75.5931	0.290817	0.290235	7.57373	0.181346	0.294979
217	ACY1	924.179	0.17063	0.266655	11.1669	0.0481687	0.109854
218	ACYP1	39.2328	0.252372	0.347884	6.77487	0.237929	0.359251
219	ACYP2	42.9919	0.565854	0.627162	7.78033	0.168765	0.28025
220	ADA	46.0304	-0.399704	0.506095	11.9008	0.0361721	0.0885118
221	ADA2	648.169	-0.65368	0.295807	19.1206	0.00182519	0.00900844
222	ADAD1	0	NA	NA	NA	NA	NA
223	ADAD2	0.659678	1.8376	2.06271	1.51253	0.911619	NA
224	ADAL	197.97	-0.175772	0.193032	2.22963	0.816545	0.864864
225	ADAM10	644.186	-0.245326	0.217539	21.6311	0.000615236	0.00376926
226	ADAM11	39.6716	0.89261	0.325687	23.7181	0.000245938	0.00182703
227	ADAM12	6.79452	1.17017	0.789368	9.77223	0.0819523	0.163498
228	ADAM15	55.9674	0.103343	0.265781	9.25	0.0994983	0.189406
229	ADAM17	243.195	-0.373254	0.248881	16.3428	0.00593064	0.0225233
230	ADAM19	39.6498	-0.206454	0.527724	4.36329	0.49838	0.608431
231	ADAM2	6.81153	0.0089328	0.756892	2.78285	0.733421	0.798434
232	ADAM22	16.6027	0.524864	0.451564	3.47245	0.62756	0.715406
233	ADAM23	37.7868	0.332271	0.420892	2.64239	0.754915	0.816251
234	ADAM28	1.51821	0.659471	1.69993	1.95266	0.855656	0.893913
235	ADAM32	0.129882	-0.635049	5.30442	-0.00129854	1	NA
236	ADAM33	16.8835	-0.500934	0.499605	7.72026	0.172342	0.284423
237	ADAM7	0	NA	NA	NA	NA	NA
238	ADAM8	74.8287	-0.141011	0.492209	3.9335	0.559029	0.658916
239	ADAM9	490.538	-0.408564	0.264543	37.2183	5.41529e-07	1.15459e-05
240	ADAMDEC1	1.26451	3.81605	1.84073	10.5525	0.0610111	NA
241	ADAMTS1	515.616	0.615565	0.621638	5.66008	0.340712	0.462811
242	ADAMTS10	52.5464	-0.893075	0.458566	10.1602	0.0708206	0.147076
243	ADAMTS12	23.0165	-0.112922	0.685019	4.7342	0.449172	0.564131
244	ADAMTS13	33.9683	-0.140175	0.367184	2.55334	0.768441	0.826761
245	ADAMTS14	2.83275	-1.53057	1.28168	7.12971	0.211171	0.330303
246	ADAMTS15	25.9843	-1.26831	0.526342	11.9349	0.0356907	0.0876643
247	ADAMTS16	28.966	0.811197	0.664459	8.24878	0.143047	0.248582
248	ADAMTS17	7.8902	-1.86221	0.712796	23.7223	0.000245481	0.00182544
249	ADAMTS18	1.76467	0.530321	1.24579	0.911907	0.969354	0.979714
250	ADAMTS19	0.577243	2.34798	3.0679	1.38027	0.926459	NA
251	ADAMTS2	12.5889	-0.637967	0.568051	8.60251	0.126008	0.226287
252	ADAMTS20	9.71924	-1.12033	0.639607	4.39531	0.494011	0.604347
253	ADAMTS3	12.1769	-0.32142	0.552813	3.76459	0.583782	0.678913
254	ADAMTS4	68.365	-1.46765	0.417377	74.9798	9.39373e-15	1.33535e-12
255	ADAMTS5	9.26852	1.21663	0.864956	29.6996	1.68988e-05	0.000208875
256	ADAMTS6	0.846371	1.49718	2.34214	3.73658	0.587931	NA
257	ADAMTS7	89.5117	-0.0780492	0.545717	9.09781	0.105226	0.197401
258	ADAMTS8	0.0422375	-0.461967	5.30442	-0.931329	1	NA
259	ADAMTS9	6.0235	0.745466	0.771606	2.48099	0.779355	0.835244
260	ADAMTSL1	8.64246	0.158717	0.559635	3.61491	0.606076	0.697194
261	ADAMTSL2	118.6	-0.314145	0.299848	8.26745	0.142099	0.247308
262	ADAMTSL3	13.2933	0.438078	0.515784	6.63789	0.248994	0.371078
263	ADAMTSL4	88.2475	0.454674	0.297374	8.8638	0.114622	0.210541
264	ADAMTSL5	63.5099	0.746858	0.37247	13.6384	0.0180772	0.0528379
265	ADAP1	3106.58	-0.0644518	0.119769	3.89957	0.563964	0.663031
266	ADAP2	121.172	0.151454	0.342867	23.89	0.00022794	0.00171874
267	ADAR	678.734	-0.0267629	0.16702	8.12706	0.149371	0.25685
268	ADARB1	178.277	0.418506	0.215675	5.79975	0.326194	0.448503
269	ADARB2	12.4266	0.176768	0.498251	7.01519	0.219513	0.339905
270	ADAT1	65.6971	0.264051	0.320999	12.4671	0.0289189	0.075061
271	ADAT2	62.2868	-0.187897	0.259525	8.88897	0.113575	0.208978
272	ADAT3	15.3575	0.42036	0.448692	1.91938	0.860184	0.897408
273	ADCK1	654.771	0.187957	0.221697	6.87426	0.230161	0.350984
274	ADCK2	485.485	0.201831	0.193035	1.49711	0.913403	0.937548
275	ADCK5	360.439	-0.0779386	0.145718	12.4096	0.0295866	0.0761867
276	ADCY1	13.9164	0.925404	0.450911	9.17162	0.102411	0.193508
277	ADCY10	3.62029	1.05968	0.913068	6.39657	0.26952	0.392063
278	ADCY2	40.8096	0.735569	0.285918	21.8908	0.000549231	0.00345035
279	ADCY3	29.0948	0.468517	0.422241	3.8268	0.574612	0.671801
280	ADCY4	22.7816	0.0693399	0.331216	9.58569	0.0878627	0.172212
281	ADCY5	35.2208	0.44728	0.501226	10.4637	0.0631135	0.135084
282	ADCY6	497.642	-0.517079	0.214447	35.7717	1.05509e-06	2.0362e-05
283	ADCY7	986.207	-0.0136023	0.207249	7.02103	0.219081	0.339468
284	ADCY8	5.19769	0.550811	0.631083	1.94073	0.857283	0.895089
285	ADCY9	3109	0.327483	0.168253	7.69134	0.174087	0.286333
286	ADCYAP1	5.63322	0.679372	0.767934	2.46892	0.781168	0.836925
287	ADCYAP1R1	59.7061	0.561762	0.40206	24.2274	0.000196322	0.00152763
288	ADD1	1182.8	0.0115756	0.162545	28.3167	3.15603e-05	0.000345145
289	ADD2	52.0365	0.602196	0.299286	11.689	0.0393068	0.0940056
290	ADD3	99.9773	0.526368	0.382371	20.5236	0.000996275	0.00554261
291	ADGB	0.734953	0.16587	1.87735	2.20768	0.819726	NA
292	ADGRA1	2.39421	0.375944	1.0427	3.67321	0.597355	0.689827
293	ADGRA2	76.1864	-0.379808	0.340551	3.8875	0.565724	0.664614
294	ADGRA3	238.638	0.0698533	0.31105	18.682	0.00220263	0.0105229
295	ADGRB1	67.6388	0.512311	0.325558	25.7714	9.88214e-05	0.000880628
296	ADGRB2	95.9632	0.351478	0.289426	7.7382	0.171267	0.282997
297	ADGRB3	15.7776	0.533843	0.435568	9.18741	0.101818	0.192795
298	ADGRD1	60.5443	0.974236	0.61689	30.7104	1.06848e-05	0.000145444
299	ADGRE1	387.677	-0.334535	0.207046	25.3281	0.000120406	0.00103217
300	ADGRE5	283.845	-0.00695306	0.336811	1.08416	0.955497	0.969488
301	ADGRF1	0.0409895	0.403622	5.30442	-1.06202	1	NA
302	ADGRF3	0.374785	-1.06576	5.30052	1.00096	0.962488	NA
303	ADGRF4	0.0874701	-1.21211	5.30442	-0.217841	1	NA
304	ADGRF5	147.996	-0.108005	0.403418	14.6764	0.0118384	0.0380704
305	ADGRG1	240.426	0.20024	0.30629	9.85581	0.0794255	0.159885
306	ADGRG2	16.0783	2.2991	0.72788	33.5765	2.89085e-06	4.84602e-05
307	ADGRG3	16.6185	-0.853391	0.640507	7.62044	0.178432	0.291511
308	ADGRG4	0	NA	NA	NA	NA	NA
309	ADGRG5	11.0973	0.0858539	0.568432	5.20256	0.391663	0.512109
310	ADGRG6	25.2659	0.430619	0.540387	6.69133	0.244627	0.366363
311	ADGRG7	0.516267	2.25563	3.9848	1.35749	0.928907	NA
312	ADGRL1	62.7443	0.651929	0.326319	19.2656	0.00171502	0.00859166
313	ADGRL2	203.907	-0.0274732	0.277166	18.0721	0.00285744	0.0128637
314	ADGRL3	33.1523	-0.139993	0.376041	4.00392	0.548852	0.650545
315	ADGRL4	50.8729	0.126485	0.509833	14.3021	0.0138001	0.042936
316	ADGRV1	8.75301	-0.583187	0.68311	12.4608	0.0289915	0.0751965
317	ADH7	174.279	0.918198	0.291983	31.5966	7.14029e-06	0.000105213
318	ADHFE1	788.475	0.56809	0.243461	12.4326	0.0293175	0.0757519
319	ADI1	887.702	0.282108	0.306674	5.75919	0.33036	0.452682
320	ADIG	0.411827	0.376076	4.0749	1.33254	0.931548	NA
321	ADIPOQ	4.68065	-0.217205	2.54521	0.882211	0.971496	0.981016
322	ADIPOR1	2024.13	-0.0356672	0.12737	6.63822	0.248966	0.371071
323	ADIPOR2	1887.82	-0.0830346	0.151841	9.69994	0.0841978	0.166798
324	ADIRF	13.4994	-0.0679192	0.551943	6.75167	0.239773	0.361084
325	ADISSP	133.378	0.107204	0.280254	6.99373	0.221107	0.341419
326	ADK	6816.4	0.10906	0.213607	20.0981	0.00119783	0.00644025
327	ADM	27.8318	0.31893	0.384325	6.51506	0.259275	0.381694
328	ADM2	9.60827	2.40413	0.982602	22.0827	0.000504972	0.00322655
329	ADNP	522.263	-0.0261684	0.215799	7.75589	0.170212	0.281805
330	ADNP2	124.61	-0.603886	0.183952	20.4955	0.00100849	0.00559821
331	ADO	474.158	-0.236462	0.21236	5.01339	0.414249	0.532331
332	ADORA1	27.4077	1.10774	0.384349	18.6043	0.00227703	0.0108172
333	ADORA2A	11.1996	0.763052	0.649475	1.75961	0.881306	0.913409
334	ADORA2B	1.70145	0.289791	1.70325	0.727465	0.981427	0.98757
335	ADORA3	4.46371	-0.672289	1.19289	2.74601	0.739072	0.803172
336	ADPGK	454.214	0.21738	0.165988	22.2861	0.000461922	0.00300156
337	ADPRH	149.058	0.104484	0.243608	12.201	0.0321349	0.0812009
338	ADPRHL1	2.40245	3.08583	1.25699	16.635	0.00524661	0.0204968
339	ADPRM	76.1754	-0.213338	0.305946	8.66164	0.123345	0.222573
340	ADPRS	222.848	-0.181905	0.198584	7.4496	0.189292	0.304477
341	ADRA1A	10.9474	0.210163	0.470178	4.95771	0.421063	0.539062
342	ADRA1B	564.215	0.369343	0.26431	18.7566	0.00213342	0.0102348
343	ADRA1D	34.197	0.428625	0.345915	8.3904	0.135992	0.23943
344	ADRA2A	18.4489	1.2815	0.749697	11.7262	0.0387377	0.092989
345	ADRA2B	10.3426	-0.852176	0.562617	5.42852	0.365847	0.487352
346	ADRA2C	13.5701	1.77076	0.642165	40.3466	1.27132e-07	3.34459e-06
347	ADRB1	98.0788	0.111511	0.284479	0.814393	0.976106	0.984496
348	ADRB2	30.8492	-1.76551	0.442608	25.0526	0.000136115	0.00114086
349	ADRB3	0.253282	1.28423	4.47879	0.835724	0.974699	NA
350	ADRM1	1598.07	-0.133923	0.160638	10.471	0.0629384	0.134745
351	ADSL	471.782	0.261188	0.152144	5.59978	0.347129	0.469142
352	ADSS1	56.2461	1.75722	0.457178	14.2657	0.0140072	0.043456
353	ADSS2	401.918	-0.65255	0.214282	28.5501	2.84085e-05	0.000316124
354	ADTRP	16.9115	0.557177	0.658749	1.11275	0.952969	0.967589
355	AEBP1	160.956	-0.0457607	0.543326	17.315	0.00393962	0.0164502
356	AEBP2	297.586	0.0661918	0.246172	13.5803	0.0185074	0.0538118
357	AEN	61.3272	0.110358	0.332364	7.11286	0.212381	0.331705
358	AFAP1	28.4697	0.043526	0.37365	6.28243	0.279699	0.40228
359	AFAP1L1	72.8655	1.83355	0.471196	29.3354	1.99263e-05	0.000239413
360	AFAP1L2	25.6995	0.218014	0.422447	2.69092	0.747506	0.809929
361	AFDN	1675.28	0.0118981	0.140894	5.11751	0.401709	0.521093
362	AFF1	835.314	0.328979	0.264404	29.3954	1.93925e-05	0.00023405
363	AFF2	7.82997	0.995813	0.668984	5.39637	0.369443	0.491057
364	AFF3	20.9138	0.440093	0.365769	17.515	0.0036199	0.0154299
365	AFF4	519.319	-0.297075	0.261293	16.9029	0.00468776	0.0188213
366	AFG1L	219.855	0.270341	0.149129	24.4222	0.000180085	0.00142263
367	AFG2A	368.289	0.0602402	0.148175	26.7694	6.32529e-05	0.000614413
368	AFG2B	73.5587	-0.269367	0.260065	9.0359	0.107641	0.20093
369	AFG3L2	2729.29	0.161515	0.13006	10.8362	0.0547264	0.121149
370	AFMID	1243.47	0.571257	0.271998	16.2854	0.00607465	0.0229347
371	AFP	3.92231	-1.20642	0.950803	6.01893	0.304381	0.426615
372	AFTPH	569.991	-0.0115241	0.169317	27.7879	4.00429e-05	0.000421013
373	AGA	581.775	0.0492285	0.157012	4.38525	0.495381	0.605885
374	AGAP1	794.146	0.539078	0.134135	28.2057	3.3179e-05	0.00035894
375	AGAP2	211.538	0.510911	0.228919	26.4777	7.20771e-05	0.000680394
376	AGAP3	625.989	-0.0364012	0.222515	2.35737	0.797805	0.850329
377	AGBL1	5.59936	3.61943	0.990637	25.2649	0.000123846	0.00105397
378	AGBL2	0.686177	-0.347774	1.93472	0.943249	0.967012	NA
379	AGBL3	3.6412	1.01362	1.24761	12.9001	0.0243328	0.0659318
380	AGBL4	1.61915	0.890257	1.23891	0.865222	0.972688	0.982034
381	AGBL5	149.339	-0.323477	0.223406	6.04947	0.301435	0.423776
382	AGER	70.8188	-0.0607211	0.307375	3.81073	0.576975	0.673648
383	AGFG1	383.707	-0.237866	0.197684	6.3986	0.269341	0.391991
384	AGFG2	473.468	-0.260079	0.248546	14.0753	0.015138	0.0460993
385	AGGF1	235.595	0.0554086	0.205212	8.33373	0.138777	0.243066
386	AGK	191.088	0.892848	0.195408	46.8933	5.97337e-09	2.33645e-07
387	AGL	2935.98	0.0993637	0.141035	6.09146	0.297421	0.419895
388	AGMAT	4421.21	0.671324	0.181328	46.1995	8.27123e-09	3.15091e-07
389	AGMO	1065.52	-0.404365	0.27557	35.2251	1.35674e-06	2.49839e-05
390	AGO1	250.454	0.276663	0.184271	7.21117	0.205403	0.3237
391	AGO2	737.565	-0.137052	0.177553	25.0101	0.000138708	0.00116018
392	AGO3	77.3489	-0.0253827	0.207417	32.5971	4.52429e-06	7.13064e-05
393	AGO4	39.0289	1.00531	0.415728	60.6296	9.00736e-12	6.70381e-10
394	AGPAT1	217.505	0.137334	0.157359	3.44474	0.631765	0.718671
395	AGPAT2	2321.02	0.38053	0.239853	22.3034	0.000458425	0.00298366
396	AGPAT3	5829.47	0.0177185	0.197472	3.57616	0.611896	0.70213
397	AGPAT4	21.788	0.202269	0.419085	3.00786	0.698774	0.771796
398	AGPAT5	336.78	0.463884	0.122132	67.5766	3.2702e-13	3.32733e-11
399	AGPS	291.684	-0.14037	0.201919	5.10849	0.402784	0.521959
400	AGR2	0.0516348	-0.288856	5.30442	-0.798959	1	NA
401	AGRN	366.426	-0.178157	0.147518	16.9623	0.00457188	0.0184251
402	AGRP	12.2553	-0.307523	0.456124	2.93332	0.710265	0.780146
403	AGT	9797.63	-0.20597	0.17733	14.8027	0.0112397	0.036588
404	AGTPBP1	267.428	0.276016	0.170977	13.6634	0.0178946	0.0524762
405	AGTR1	26.941	0.910558	0.517945	26.4689	7.23613e-05	0.000682676
406	AGTR2	0.0426858	0.288181	5.30442	-0.885492	1	NA
407	AGTRAP	36.4998	-0.160636	0.347207	7.24034	0.20337	0.321094
408	AGXT	5305.59	0.0709231	0.262002	19.3358	0.00166403	0.0083853
409	AGXT2	2351.48	-0.0471696	0.155922	40.392	1.24477e-07	3.29669e-06
410	AHCTF1	593.024	-0.330496	0.260802	21.1276	0.000766291	0.00450911
411	AHCY	32290	0.575008	0.160293	44.378	1.94098e-08	6.66736e-07
412	AHCYL1	5322.24	0.00626982	0.131058	16.0901	0.00659139	0.0244267
413	AHCYL2	145.873	-0.0230068	0.204977	24.5087	0.000173307	0.0013813
414	AHDC1	188.123	-0.401185	0.258207	10.5347	0.0614277	0.132392
415	AHI1	14.3273	-0.342173	0.460619	3.66405	0.598723	0.691009
416	AHNAK	605.833	0.0659257	0.344133	3.67199	0.597538	0.689989
417	AHNAK2	9.10729	-0.350131	0.791211	9.60125	0.0873551	0.171441
418	AHR	1084.61	-0.329516	0.248173	46.8947	5.96929e-09	2.33645e-07
419	AHRR	2.88996	-0.978555	0.963629	3.92979	0.559568	0.659455
420	AHSA1	1833.19	-0.38283	0.128427	64.1553	1.67749e-12	1.49819e-10
421	AHSA2P	734.306	0.265288	0.196061	28.8271	2.50702e-05	0.000286137
422	AHSG	44826.8	-0.0605483	0.231147	36.49	7.57811e-07	1.52092e-05
423	AHSP	82.1785	-0.702293	0.387976	8.27692	0.14162	0.246688
424	AICDA	1.55501	-0.294104	1.25558	7.05665	0.216461	0.336345
425	AIDA	539.51	-0.153739	0.157317	14.8048	0.01123	0.0365792
426	AIF1	18.5516	-0.346931	0.37941	11.835	0.0371204	0.0901294
427	AIF1L	26.8833	0.192249	0.353122	10.0611	0.0735218	0.151143
428	AIFM1	1650.29	0.0290846	0.144804	6.61718	0.250703	0.373154
429	AIFM2	913.841	-1.00831	0.239991	18.382	0.00250389	0.0116472
430	AIFM3	132.984	1.72163	0.306588	64.5253	1.40588e-12	1.29148e-10
431	AIG1	490.452	1.27947	0.33643	36.2386	8.50954e-07	1.68265e-05
432	AIMP1	335.347	-0.478691	0.181598	12.7352	0.0259908	0.0691998
433	AIMP2	184.64	0.264432	0.192565	3.43254	0.633619	0.720068
434	AIP	391.351	-0.174547	0.159909	9.36716	0.0952857	0.182995
435	AIPL1	0.0400197	-1.09669	5.30442	-0.994044	1	NA
436	AIRE	0	NA	NA	NA	NA	NA
437	AIRIM	114.27	-0.00615405	0.295721	3.29859	0.654058	0.736165
438	AJAP1	8.83157	0.616865	0.593062	6.36457	0.272343	0.39493
439	AJM1	7.72422	1.33686	0.575169	7.30166	0.199155	0.316239
440	AJUBA	26.4696	0.28298	0.373579	17.4295	0.00375329	0.015845
441	AK1	117.566	1.21585	0.301659	28.2364	3.27229e-05	0.000354723
442	AK2	3457	0.0422758	0.109719	20.4084	0.00104731	0.00576549
443	AK3	1372.75	-0.0905619	0.210744	7.23174	0.203968	0.32188
444	AK4	446.563	0.739531	0.492557	11.6513	0.039891	0.095062
445	AK5	22.5156	0.744375	0.436213	10.3161	0.0667593	0.140735
446	AK6	237.458	-0.319749	0.169897	10.9493	0.0523953	0.117264
447	AK7	2.75587	0.932515	1.25151	4.172	0.524928	0.63084
448	AK8	10.4679	0.493869	0.632878	9.64357	0.085988	0.169426
449	AK9	1.92065	-0.992345	3.81195	4.21344	0.519113	0.626051
450	AKAIN1	3.77515	0.66848	0.838709	3.63684	0.60279	0.694704
451	AKAP1	1743.53	-0.133215	0.135405	15.1012	0.00993866	0.0334045
452	AKAP10	370.215	-0.0571998	0.143019	25.755	9.95462e-05	0.000885124
453	AKAP11	341.172	-0.160314	0.182358	16.7573	0.00498392	0.0196665
454	AKAP12	31.9411	0.614886	0.417231	15.9173	0.00708418	0.0258877
455	AKAP13	864.059	-0.170529	0.186408	23.1186	0.000320383	0.00222387
456	AKAP14	3.63734	0.0354749	0.935482	16.1182	0.00651471	0.0242432
457	AKAP17A	326.313	-0.0102631	0.243835	6.31451	0.276808	0.399595
458	AKAP3	0.103542	0.403602	5.30442	-0.181907	1	NA
459	AKAP4	0	NA	NA	NA	NA	NA
460	AKAP5	22.0882	-0.0141648	0.346637	5.11824	0.401622	0.521091
461	AKAP6	27.1348	0.766589	0.384622	14.4627	0.0129226	0.0407181
462	AKAP7	304.135	0.466782	0.252406	6.79399	0.236418	0.35758
463	AKAP8	204.413	0.0986863	0.241787	13.708	0.0175747	0.0517074
464	AKAP8L	651.476	-0.0749816	0.177877	14.6191	0.0121201	0.0387669
465	AKAP9	886.851	-0.232648	0.192884	21.2911	0.000713615	0.00426947
466	AKIP1	44.1137	0.191275	0.317251	4.42506	0.489973	0.6007
467	AKIRIN1	924.828	0.41241	0.144047	13.6564	0.0179462	0.0525568
468	AKIRIN2	176.285	-0.415461	0.1326	19.8069	0.0013584	0.00711322
469	AKNA	60.7011	-0.0709152	0.358026	0.263492	0.998274	0.998947
470	AKNAD1	0	NA	NA	NA	NA	NA
471	AKR1A1	2350.64	0.36432	0.157316	13.4938	0.0191655	0.0552158
472	AKR1D1	7097.7	-1.48028	0.272237	107.105	1.67553e-21	5.28153e-19
473	AKR1E2	150.639	-0.182861	0.278144	3.52608	0.619445	0.709021
474	AKR7A2	1057.38	0.437606	0.154658	25.3254	0.000120554	0.00103217
475	AKT1	991.252	-0.168587	0.119132	14.1794	0.0145091	0.0445046
476	AKT1S1	608.745	0.0645223	0.191965	8.72318	0.120628	0.218947
477	AKT2	2223.59	0.357645	0.137383	7.5981	0.17982	0.293065
478	AKT3	46.7012	0.214425	0.293396	7.45653	0.18884	0.303792
479	AKTIP	337.595	-0.206078	0.181819	3.91258	0.562069	0.661513
480	ALAD	2414.55	-0.235687	0.217188	12.4495	0.0291219	0.0754373
481	ALAS1	1169.48	-0.35563	0.241173	14.0495	0.0152979	0.0464572
482	ALAS2	161.629	-0.0846295	0.350477	15.0245	0.0102581	0.0341286
483	ALB	753175	0.064954	0.251969	6.09835	0.296767	0.419266
484	ALCAM	2321.32	-1.18555	0.250918	64.7514	1.26203e-12	1.17274e-10
485	ALDH16A1	1112.44	-0.320266	0.17585	17.1512	0.00422175	0.0173356
486	ALDH18A1	29.1676	0.110901	0.360433	3.90654	0.562949	0.662129
487	ALDH1A1	18299.1	-0.163632	0.167843	65.4943	8.85026e-13	8.41874e-11
488	ALDH1A2	93.8195	-0.785797	0.45077	11.6004	0.0406933	0.0965161
489	ALDH1A3	109.03	0.400366	0.407597	25.488	0.00011213	0.000976493
490	ALDH1B1	3714.35	0.43625	0.21914	16.8669	0.00475917	0.019005
491	ALDH1L1	14621.7	0.0964841	0.178365	13.4488	0.0195174	0.0560488
492	ALDH1L2	1.05039	-0.813818	1.37595	1.49597	0.913534	NA
493	ALDH2	31679.9	-0.148168	0.170615	3.06629	0.689766	0.764789
494	ALDH3A2	3909.16	-0.332082	0.164788	59.6719	1.42082e-11	1.01969e-09
495	ALDH3B1	33.5777	0.0138251	0.471555	12.795	0.025378	0.0679961
496	ALDH4A1	18750.5	-0.12119	0.157981	3.56588	0.613444	0.703654
497	ALDH5A1	2566.04	0.0912953	0.214681	2.53217	0.771642	0.829268
498	ALDH6A1	7130.79	0.0887973	0.158075	2.07809	0.838238	0.881328
499	ALDH7A1	11794.4	-0.00894932	0.15948	0.959946	0.965731	0.977097
500	ALDH8A1	5170.31	0.344692	0.172706	21.6282	0.000616016	0.0037726
501	ALDH9A1	1816.41	0.407863	0.261815	12.4895	0.0286621	0.0746191
502	ALDOA	2066.93	0.347024	0.138854	12.1653	0.0325921	0.0820212
503	ALDOB	29288.4	0.364271	0.225915	4.96201	0.420534	0.538643
504	ALDOC	76.6431	0.710395	0.437282	15.755	0.00757944	0.0271919
505	ALG1	330.683	0.0425366	0.202056	15.4791	0.0084997	0.0297046
506	ALG10	353.043	0.148901	0.195639	5.26839	0.384011	0.504731
507	ALG11	258.368	-0.144319	0.240082	8.7284	0.1204	0.218733
508	ALG12	829.635	0.0694367	0.142086	10.3133	0.0668304	0.140845
509	ALG14	151.655	-0.0862819	0.221615	9.88133	0.0786683	0.158883
510	ALG2	616.987	-0.39564	0.257747	14.4343	0.013074	0.0411065
511	ALG3	239.958	-0.00707913	0.163814	6.739	0.240786	0.362069
512	ALG5	534.751	-0.273239	0.197494	8.05821	0.153057	0.261676
513	ALG6	119.071	0.135446	0.229116	2.10186	0.834879	0.87885
514	ALG8	156.144	0.16091	0.15208	8.80894	0.116932	0.213927
515	ALG9	1113.42	-0.364316	0.178103	5.91708	0.314372	0.436831
516	ALK	10.3121	0.829452	0.542016	8.95789	0.110756	0.205317
517	ALKAL2	8.91301	-0.25275	0.528127	4.52409	0.476667	0.589186
518	ALKBH1	71.2488	0.366682	0.26256	14.2245	0.0142444	0.0439442
519	ALKBH2	90.2252	-0.0197646	0.277598	6.59699	0.252379	0.374942
520	ALKBH3	115.559	0.00793393	0.280795	16.4722	0.00561753	0.0216357
521	ALKBH4	91.4771	0.0217699	0.270715	2.82571	0.726835	0.793251
522	ALKBH5	327.467	0.096348	0.173536	18.0229	0.00291781	0.0130518
523	ALKBH6	240.472	0.115116	0.218258	3.75659	0.584965	0.679718
524	ALKBH7	473.119	0.203122	0.156155	5.70564	0.335923	0.458515
525	ALKBH8	83.7993	0.211673	0.296542	10.6009	0.0598922	0.129901
526	ALLC	0.300802	-1.07033	5.29361	1.38709	0.925721	NA
527	ALMS1	101.307	-0.198142	0.242972	5.96432	0.309707	0.432041
528	ALOX12	10.8813	0.102651	0.64182	2.39262	0.792573	0.845987
529	ALOX5	27.6822	-0.857489	0.653382	7.7825	0.168637	0.280122
530	ALOX5AP	13.7977	1.7186	0.667811	26.4192	7.39906e-05	0.00069438
531	ALOXE3	2.88435	0.747181	1.07794	3.26848	0.658671	0.739648
532	ALPI	2.54704	-0.462821	1.30134	0.981046	0.96408	0.975795
533	ALPK1	256.984	-0.600209	0.381214	6.24874	0.282762	0.405267
534	ALPK2	15.2901	2.74213	0.620209	42.2012	5.36322e-08	1.5937e-06
535	ALPK3	82.2021	1.32881	0.349461	26.1917	8.19104e-05	0.000758084
536	ALPL	589.298	0.82001	0.326222	47.9929	3.56388e-09	1.50375e-07
537	ALS2	595.015	0.225779	0.206765	8.06072	0.152921	0.261547
538	ALS2CL	57.3806	-0.643568	0.499788	13.2265	0.0213463	0.0597732
539	ALX1	0.031118	0.403622	5.30442	-1.24692	1	NA
540	ALX3	0.478268	1.16512	3.13598	1.92286	0.859713	NA
541	ALX4	0.174044	-1.32754	5.30442	0.335464	0.996922	NA
542	ALYREF	177.87	-0.28069	0.184062	8.08006	0.151878	0.260132
543	AMACR	2345.43	0.45938	0.234175	16.8742	0.00474473	0.0189601
544	AMBN	0.119751	0.692157	5.30442	0.0251156	0.999995	NA
545	AMBP	49821.2	0.232714	0.106964	52.1889	4.9344e-10	2.5103e-08
546	AMBRA1	409.723	-0.0114627	0.142542	3.30498	0.65308	0.735474
547	AMD1	625.212	0.948321	0.207855	24.7362	0.000156662	0.00127778
548	AMDHD1	3285.57	-0.179957	0.182657	9.67531	0.0849757	0.168028
549	AMDHD2	437.069	0.506286	0.310936	17.7381	0.0032932	0.01427
550	AMELX	0	NA	NA	NA	NA	NA
551	AMER1	198.276	-0.282315	0.182031	29.8857	1.55325e-05	0.000194168
552	AMER2	1.38687	0.155161	1.44252	2.75425	0.73781	0.80218
553	AMER3	8.66099	0.411238	0.609053	10.5043	0.0621437	0.133587
554	AMFR	3227.63	-0.190303	0.128589	9.86146	0.0792571	0.159606
555	AMH	0.0756859	0.403612	5.30442	-0.525173	1	NA
556	AMHR2	0.531849	0.527451	2.56269	2.6558	0.752869	NA
557	AMIGO1	247.837	0.526735	0.258481	16.8336	0.00482649	0.0191875
558	AMIGO2	2.84287	-0.568315	0.844187	4.6651	0.458101	0.572573
559	AMMECR1	52.1171	0.015436	0.433339	7.20316	0.205964	0.324361
560	AMMECR1L	575.498	0.304261	0.203423	31.6968	6.82159e-06	0.000101073
561	AMN	354.741	0.148353	0.304005	6.40436	0.268836	0.391746
562	AMN1	121.534	0.264618	0.211987	8.43342	0.133911	0.236775
563	AMOT	102.64	-0.147788	0.307642	31.0593	9.11795e-06	0.000128918
564	AMOTL1	126.496	-0.442566	0.230444	6.9182	0.226796	0.347334
565	AMOTL2	182.047	-0.337118	0.238727	14.9402	0.0106208	0.0350379
566	AMPD1	3.26834	2.81134	1.30696	4.79207	0.44178	0.557833
567	AMPD2	425.603	0.195537	0.225019	25.8042	9.73863e-05	0.000871121
568	AMPD3	176.447	0.438609	0.33561	19.6599	0.00144729	0.00748362
569	AMPH	44.2129	1.05518	0.46583	16.7486	0.00500217	0.0197095
570	AMT	1939.14	0.486231	0.154132	23.8264	0.000234437	0.00176031
571	AMTN	0	NA	NA	NA	NA	NA
572	AMZ2	106.821	-0.479215	0.323213	13.6484	0.0180042	0.052682
573	ANAPC1	517.7	0.0769907	0.186915	3.80655	0.57759	0.674023
574	ANAPC10	68.9791	0.451987	0.257372	6.76774	0.238495	0.359783
575	ANAPC11	46.5209	0.00343104	0.255085	6.98791	0.221541	0.341827
576	ANAPC13	173.365	-0.161182	0.183974	6.86262	0.23106	0.35192
577	ANAPC15	114.848	0.00515731	0.22485	2.90432	0.714734	0.783716
578	ANAPC16	430.033	-0.265464	0.169756	14.7615	0.0114317	0.0370636
579	ANAPC2	1495	-0.114226	0.121269	2.38376	0.79389	0.847168
580	ANAPC4	314.439	0.0351534	0.20051	3.83447	0.573486	0.670938
581	ANAPC5	377.119	0.210408	0.271275	1.56655	0.905265	0.931215
582	ANAPC7	227.675	0.216308	0.167742	14.403	0.0132421	0.0415294
583	ANG	2072.11	0.940669	0.370941	12.8392	0.0249332	0.0671626
584	ANGEL1	507.571	0.0260096	0.264738	7.12607	0.211432	0.330576
585	ANGEL2	228.44	-0.183062	0.158936	10.3215	0.0666216	0.140608
586	ANGPT1	4.46696	0.483823	0.861926	2.60483	0.760631	0.820774
587	ANGPT2	9.57109	0.750214	0.647148	3.55359	0.615294	0.705375
588	ANGPT4	23.3037	-0.317639	0.433886	5.65601	0.341142	0.463142
589	ANGPTL1	2.78891	-0.323412	1.09134	15.9594	0.00696082	0.0255543
590	ANGPTL2	90.9928	-0.100172	0.326644	2.68877	0.747836	0.810122
591	ANGPTL3	4267.3	0.143837	0.194888	11.6765	0.0395002	0.0943543
592	ANGPTL4	7.70464	0.0730228	0.76803	10.0116	0.0749075	0.153208
593	ANGPTL6	84.3152	0.159635	0.406251	16.385	0.00582667	0.0222546
594	ANGPTL7	1.58289	-0.591281	1.34264	2.88711	0.717385	0.785659
595	ANGPTL8	509.221	0.366407	0.462181	4.40885	0.492171	0.602552
596	ANHX	9.94045	0.338331	0.535005	6.3495	0.273681	0.396119
597	ANK1	96.4911	0.437656	0.247142	9.07646	0.106053	0.198614
598	ANK2	72.864	0.942068	0.296452	32.1599	5.52339e-06	8.41649e-05
599	ANK3	58.929	0.813238	0.31482	20.9226	0.000837805	0.00482683
600	ANKAR	11.9281	-0.244021	0.626391	5.44108	0.36445	0.486377
601	ANKDD1A	12.4034	1.02833	0.549216	7.59854	0.179793	0.293065
602	ANKEF1	0	NA	NA	NA	NA	NA
603	ANKFN1	13.0044	0.355337	0.537989	1.97211	0.852991	0.891881
604	ANKFY1	386.594	-0.40569	0.18862	8.66703	0.123105	0.222333
605	ANKH	379.913	0.0967859	0.268219	3.0571	0.691183	0.765779
606	ANKHD1	855.91	-0.403587	0.153433	24.6414	0.000163394	0.00131534
607	ANKIB1	315.575	-0.114274	0.220067	16.3084	0.00601665	0.0227685
608	ANKK1	0	NA	NA	NA	NA	NA
609	ANKLE1	15.0243	-0.628029	0.471051	2.33816	0.800646	0.852767
610	ANKLE2	291.418	-0.321897	0.193308	23.5695	0.000262622	0.00191336
611	ANKMY1	27.6894	-0.671127	0.333665	10.4335	0.0638448	0.136358
612	ANKMY2	443.116	0.213891	0.222247	21.1524	0.000758063	0.0044738
613	ANKRA2	107.221	-0.541016	0.224576	15.0308	0.0102317	0.034079
614	ANKRD1	157.881	3.20956	0.500454	73.095	2.32264e-14	3.06056e-12
615	ANKRD10	257.071	0.0723592	0.299678	4.24087	0.515283	0.623115
616	ANKRD11	977.704	-0.226215	0.234709	10.1206	0.0718901	0.148644
617	ANKRD12	504.268	-0.291536	0.246756	32.8481	4.03407e-06	6.47222e-05
618	ANKRD13A	499.737	0.00538568	0.149175	5.55092	0.352395	0.474067
619	ANKRD13B	13.7185	-0.039241	0.417205	27.9481	3.72597e-05	0.000396156
620	ANKRD13C	235.762	0.00504324	0.209937	9.34215	0.096171	0.184294
621	ANKRD13D	51.1163	0.268439	0.364587	4.80655	0.439943	0.556166
622	ANKRD16	141.597	0.300446	0.224427	7.33846	0.196661	0.313239
623	ANKRD17	605.305	-0.17972	0.161929	14.9152	0.0107308	0.0353212
624	ANKRD2	12.1498	0.700214	0.741092	4.04638	0.542758	0.645226
625	ANKRD22	1.46852	2.17245	1.594	5.98177	0.307996	0.430215
626	ANKRD23	322.703	1.73438	0.46821	18.2702	0.00262614	0.0120622
627	ANKRD24	6.71474	1.24133	0.634108	14.1425	0.0147293	0.0450682
628	ANKRD26	88.0506	0.31254	0.26555	5.68238	0.338361	0.46074
629	ANKRD27	538.718	-0.619455	0.162298	29.1352	2.18132e-05	0.000256352
630	ANKRD28	739.152	-0.0182303	0.196672	14.1797	0.0145076	0.0445046
631	ANKRD29	20.6155	0.39565	0.512994	7.7224	0.172213	0.284269
632	ANKRD31	0	NA	NA	NA	NA	NA
633	ANKRD33	1.41093	-2.7734	2.44363	2.99692	0.700461	0.773128
634	ANKRD33B	65.2896	1.81429	0.522916	29.2697	2.05266e-05	0.000245343
635	ANKRD34A	18.3247	0.119913	0.408186	15.3257	0.00905751	0.0311462
636	ANKRD34B	8.57553	0.596542	0.546282	10.0132	0.0748618	0.153173
637	ANKRD34C	0	NA	NA	NA	NA	NA
638	ANKRD35	5.99039	1.29098	0.688635	4.55885	0.472048	0.585137
639	ANKRD37	36.4964	-0.273415	0.507096	4.78349	0.44287	0.558793
640	ANKRD39	142.084	0.135565	0.241687	8.16938	0.147144	0.254104
641	ANKRD40	2090.6	0.465128	0.190521	20.0006	0.00124943	0.00665697
642	ANKRD42	255.603	-0.490723	0.302003	7.28817	0.200076	0.317232
643	ANKRD44	117.254	-0.625478	0.352827	20.5683	0.000977163	0.00546396
644	ANKRD45	32.7756	0.164851	0.404462	6.26042	0.281697	0.404214
645	ANKRD46	218.744	0.116394	0.221788	10.4112	0.0643873	0.137116
646	ANKRD49	62.3606	-0.401014	0.245602	7.86235	0.163986	0.274883
647	ANKRD50	597.803	0.110982	0.261568	8.03104	0.154533	0.263244
648	ANKRD52	646.49	-0.287343	0.14792	11.891	0.0363122	0.0886897
649	ANKRD53	0.0474504	-0.288856	5.30442	-0.868957	1	NA
650	ANKRD54	227.089	0.0622691	0.324231	11.3976	0.0440416	0.1027
651	ANKRD55	1.50206	-0.599545	1.29256	6.95352	0.22412	0.34455
652	ANKRD6	8.96801	-0.365334	0.757041	18.3854	0.00250019	0.0116367
653	ANKRD61	6.35819	-0.256284	0.724076	5.32029	0.378054	0.499515
654	ANKRD63	3.51446	0.236037	0.7817	3.47407	0.627315	0.715329
655	ANKRD65	4.79187	-0.527444	0.699265	10.6165	0.0595361	0.129318
656	ANKRD66	0.124217	0.692157	5.30442	0.0578295	0.999958	NA
657	ANKRD7	0	NA	NA	NA	NA	NA
658	ANKRD9	69.2765	-0.574109	0.476656	6.10129	0.296488	0.419059
659	ANKS1A	264.087	0.35896	0.170097	17.4316	0.00375005	0.0158355
660	ANKS1B	25.3003	0.361807	0.402085	6.28226	0.279714	0.40228
661	ANKS3	88.3001	-0.0444068	0.232032	6.84123	0.232719	0.353877
662	ANKS4B	285.525	-0.1462	0.213134	29.1359	2.18064e-05	0.000256352
663	ANKS6	48.637	0.467884	0.718953	8.30593	0.140162	0.24489
664	ANKUB1	6.5886	-0.911675	0.657822	4.74863	0.447322	0.562528
665	ANKZF1	130.37	-0.411682	0.28586	3.7623	0.58412	0.678982
666	ANLN	24.0463	-0.0996231	0.582437	3.22563	0.665246	0.744586
667	ANO1	1601.16	0.960247	0.254202	68.7575	1.85822e-13	1.92728e-11
668	ANO10	179.782	0.544949	0.306492	12.483	0.0287361	0.0747389
669	ANO2	0.401747	-1.54507	3.59757	1.44518	0.919308	NA
670	ANO3	57.7257	0.0967647	0.479537	34.2648	2.10871e-06	3.67277e-05
671	ANO4	6.66254	0.994212	0.713614	7.57175	0.18147	0.295043
672	ANO5	12.9839	2.03592	0.742169	11.153	0.048429	0.110411
673	ANO6	195.786	0.241577	0.477764	8.21143	0.144962	0.250905
674	ANO7	3.78751	0.277628	0.906727	1.43425	0.920531	0.942918
675	ANO8	55.9624	-0.115361	0.276212	12.2886	0.0310401	0.0791186
676	ANO9	60.2456	-0.164189	0.313672	8.36006	0.137477	0.241459
677	ANP32A	989.097	-0.0655316	0.138675	16.1275	0.00648939	0.0241853
678	ANP32B	385.349	-0.482599	0.169864	17.1666	0.00419445	0.0172499
679	ANP32E	494.804	-0.351689	0.183422	18.2341	0.00266693	0.0121973
680	ANPEP	222.197	0.0855781	0.381459	3.18778	0.671061	0.749217
681	ANTKMT	285.633	0.172457	0.338213	8.56008	0.127951	0.228778
682	ANTXR1	60.6927	-0.851836	0.444165	15.9643	0.00694685	0.0255263
683	ANTXR2	587.727	0.100727	0.338889	6.19881	0.287352	0.409855
684	ANXA1	180.659	-0.437865	0.344817	21.1589	0.000755938	0.00446289
685	ANXA10	0.801227	0.662989	1.87413	3.66148	0.599107	NA
686	ANXA11	808.401	0.282496	0.19189	13.9004	0.0162546	0.0486519
687	ANXA13	75.5836	0.294673	0.547309	11.7322	0.0386475	0.0928279
688	ANXA2	1052.32	1.1627	0.382774	39.1643	2.20067e-07	5.40122e-06
689	ANXA3	9.58273	0.91133	0.583237	5.65627	0.341115	0.463142
690	ANXA4	531.004	0.606916	0.390943	16.479	0.00560154	0.0215911
691	ANXA5	1549.92	-0.464704	0.166264	24.5697	0.000168676	0.00135197
692	ANXA6	2420.62	-0.398221	0.126539	10.9115	0.0531623	0.118502
693	ANXA7	45.4103	0.614671	0.328328	11.9969	0.0348302	0.0861035
694	ANXA9	25.6168	0.142977	0.383923	12.17	0.0325317	0.0819211
695	AOAH	4.38552	0.696088	0.925555	10.2041	0.0696546	0.145142
696	AOC1	5.67887	1.93735	1.43478	18.0944	0.00283034	0.0127688
697	AOC2	21.3057	0.211627	0.375033	4.79604	0.441275	0.557306
698	AOC3	10.7094	-0.0890196	0.732547	2.41228	0.789644	0.843588
699	AOPEP	101.524	-0.239908	0.237102	8.00451	0.155987	0.265103
700	AOX1	11184.6	0.0631503	0.182517	31.6329	7.02324e-06	0.000103869
701	AP1AR	1034.49	-0.70093	0.273933	28.9866	2.33282e-05	0.00027058
702	AP1B1	987.102	-0.0111427	0.128125	4.22437	0.517585	0.624909
703	AP1G1	1303.33	-0.119383	0.160769	23.6277	0.000255948	0.00188257
704	AP1G2	582.001	0.101478	0.140648	19.3273	0.00167009	0.00840588
705	AP1M1	1589.28	-0.00366831	0.105365	6.10281	0.296343	0.418998
706	AP1M2	19.6466	0.590897	0.531501	9.2465	0.0996268	0.189539
707	AP1S1	701.876	0.495596	0.165213	20.9308	0.000834807	0.00481534
708	AP1S2	78.283	0.0616211	0.212552	6.00691	0.305548	0.427761
709	AP1S3	25.5446	0.372844	0.42027	3.70064	0.593268	0.686142
710	AP2A1	1586.78	-0.267445	0.12452	8.52898	0.129392	0.230636
711	AP2A2	1112.56	-0.0764336	0.102936	18.462	0.00241983	0.0113713
712	AP2B1	960.679	-0.208817	0.129638	13.6139	0.0182572	0.053227
713	AP2M1	4936.43	0.330912	0.10397	14.3497	0.013534	0.0422937
714	AP2S1	748.389	-0.148928	0.117745	4.75296	0.446767	0.562122
715	AP3B1	315.889	-0.190861	0.190824	3.38774	0.640437	0.725828
716	AP3B2	27.3326	0.755988	0.469254	9.43591	0.0928902	0.179505
717	AP3D1	1640.27	-0.195849	0.161928	3.49555	0.624061	0.712529
718	AP3M1	404.022	0.0724241	0.198254	9.16129	0.102801	0.194039
719	AP3M2	20.1071	0.510609	0.369456	6.95371	0.224106	0.34455
720	AP3S1	82.1247	-0.159183	0.243957	14.2561	0.014062	0.043557
721	AP3S2	460.324	0.1515	0.140585	3.54304	0.616885	0.706593
722	AP4B1	210.867	-0.0717927	0.216204	4.66942	0.45754	0.572094
723	AP4E1	283.459	0.00924412	0.193988	10.0544	0.0737077	0.151428
724	AP4M1	135.192	-0.354575	0.181344	4.23221	0.51649	0.624011
725	AP4S1	83.8347	0.0045886	0.215101	11.8236	0.0372872	0.0903979
726	AP5B1	193.884	0.453068	0.324626	17.1544	0.00421618	0.0173216
727	AP5M1	123.176	-0.0102607	0.276723	5.89269	0.316801	0.439459
728	AP5S1	86.2118	0.159595	0.318696	6.91826	0.226791	0.347334
729	AP5Z1	505.463	-0.157151	0.199852	9.41394	0.0936495	0.18069
730	APAF1	21.4434	-0.457163	0.500183	5.00707	0.415018	0.533106
731	APBA1	57.7314	0.577559	0.383522	19.6299	0.00146611	0.00754808
732	APBA2	39.1689	0.851517	0.3746	15.1461	0.00975588	0.0330319
733	APBA3	208.444	-0.231036	0.207202	1.79571	0.876628	0.90991
734	APBB1	106.565	0.524045	0.263805	14.0164	0.0155053	0.0469156
735	APBB1IP	38.9313	0.153417	0.361975	3.93353	0.559025	0.658916
736	APBB2	144.386	0.233751	0.236125	3.85257	0.570831	0.668757
737	APBB3	102.143	-0.0558482	0.303593	24.323	0.000188174	0.00147926
738	APC	702.742	0.0198836	0.221496	17.2199	0.00410113	0.0169529
739	APC2	35.8069	0.653542	0.31193	26.5332	7.031e-05	0.000668028
740	APCDD1	65.0713	3.4878	0.670241	128.766	4.34833e-26	2.58903e-23
741	APEH	936.348	0.134534	0.139359	3.0956	0.685249	0.760883
742	APELA	8.06477	-0.501549	0.620069	7.35122	0.195802	0.312239
743	APEX1	310.75	-0.279893	0.20008	6.30089	0.278032	0.400855
744	APEX2	36.9831	-0.0237794	0.292955	6.05548	0.300857	0.423185
745	APH1A	1257.71	-0.181395	0.152476	7.48752	0.186833	0.301317
746	APH1B	806.029	-0.148703	0.207326	23.2583	0.000301267	0.00212886
747	API5	1102.05	0.254319	0.317787	17.2464	0.00405546	0.0168073
748	APIP	117.216	-0.180186	0.262394	5.67989	0.338623	0.460985
749	APLF	167.587	-0.0764916	0.231333	29.3911	1.94308e-05	0.000234335
750	APLN	21.6208	1.84118	0.556128	16.8042	0.00488656	0.0193871
751	APLNR	60.0514	0.157981	0.335253	8.96186	0.110595	0.20509
752	APLP1	133.636	0.661984	0.305502	19.2733	0.0017093	0.00856566
753	APLP2	2645.31	0.949311	0.221033	72.719	2.78191e-14	3.57776e-12
754	APMAP	2295.28	1.56495	0.325718	69.976	1.03664e-13	1.10365e-11
755	APOA1	117677	-0.151375	0.154837	16.709	0.00508608	0.0199911
756	APOA2	4449.18	0.347324	0.20199	17.6441	0.00342721	0.014767
757	APOA5	5838.57	-0.108851	0.28393	20.8229	0.000874889	0.00499457
758	APOB	2234.51	-0.163044	0.248912	20.1186	0.00118727	0.00640486
759	APOBEC1	0.967737	0.160608	2.00774	3.09087	0.685979	NA
760	APOBEC2	17.7393	1.67766	0.517023	17.2027	0.00413104	0.0170502
761	APOBR	24.7832	-0.671251	0.562359	2.57574	0.765047	0.824434
762	APOC1	30644.5	0.225216	0.12627	12.6136	0.0272813	0.0718385
763	APOC2	58.7582	0.608221	0.860203	15.7568	0.00757368	0.0271834
764	APOC3	4842.45	-0.00897356	0.212981	31.7355	6.70236e-06	9.96071e-05
765	APOC4	1872.83	0.660504	0.23153	29.9887	1.48242e-05	0.000187649
766	APOD	3.54099	-0.00411346	1.03706	1.00932	0.961811	0.974173
767	APOE	220100	0.0567835	0.132433	6.02177	0.304107	0.426338
768	APOH	34553.1	0.406551	0.152486	21.6503	0.000610106	0.00374737
769	APOLD1	13.8193	0.0323207	0.821339	2.95187	0.707405	0.777962
770	APOM	1481.57	-0.224623	0.190104	9.79678	0.0812026	0.162448
771	APOO	237.64	0.110494	0.169327	3.37629	0.642184	0.727332
772	APOOL	462.135	-0.0528792	0.183233	16.185	0.00633528	0.0237348
773	APP	624.529	0.423962	0.322883	13.6555	0.017952	0.0525582
774	APPBP2	646.397	0.166971	0.19197	24.3291	0.000187672	0.00147604
775	APPL1	220.645	-0.226091	0.238755	20.5592	0.000980999	0.00548159
776	APPL2	309.422	0.0965827	0.204231	10.488	0.0625326	0.134126
777	APRT	752.532	0.30926	0.273842	7.90286	0.161671	0.272063
778	APTX	253.866	0.132355	0.316675	0.633369	0.986425	0.990986
779	AQP1	133.198	0.0390805	0.267502	8.10198	0.150704	0.258589
780	AQP10	0.432615	0.974741	3.14415	2.23489	0.815781	NA
781	AQP11	521.341	0.243401	0.161438	3.7506	0.585852	0.680159
782	AQP2	0.32591	-0.173496	5.30442	1.622	0.898576	NA
783	AQP3	2.54759	-0.506708	2.14538	8.66713	0.123101	0.222333
784	AQP4	15.9391	0.358699	0.486399	10.9925	0.0515282	0.115872
785	AQP5	135.958	2.05999	1.00675	8.79993	0.117315	0.214485
786	AQP6	13.7421	1.91087	1.04834	7.69556	0.173831	0.286089
787	AQP7	8.92506	1.09188	0.547881	5.89778	0.316292	0.438943
788	AQP8	2125.23	0.200299	0.442451	26.8605	6.0723e-05	0.000592703
789	AQP9	1393.63	-0.213237	0.200823	57.1643	4.67752e-11	2.96046e-09
790	AQR	225.763	-0.355879	0.229667	16.8323	0.00482905	0.0191875
791	AR	647.21	-0.00996404	0.222624	10.6637	0.0584708	0.127541
792	ARAF	789.446	-0.20092	0.147525	5.15886	0.396802	0.516476
793	ARAP1	613.1	0.0131671	0.15901	14.8262	0.0111314	0.0363482
794	ARAP2	21.208	0.0566899	0.498381	5.84155	0.321943	0.444674
795	ARAP3	103.339	-0.122202	0.25331	6.80794	0.23532	0.356517
796	ARC	11.683	0.154373	0.598392	6.2664	0.281153	0.403771
797	ARCN1	2314.36	-0.107804	0.156702	24.1482	0.000203325	0.00157147
798	AREG	0.250988	-1.32756	5.30442	0.583782	0.988734	NA
799	AREL1	2680.13	-0.296376	0.130194	24.9612	0.000141758	0.00117773
800	ARF1	3142.24	-0.109561	0.134276	8.56556	0.127699	0.228511
801	ARF3	1544.44	-0.0210361	0.0887417	10.1523	0.0710326	0.14744
802	ARF4	1881.76	-0.27231	0.20841	16.5907	0.00534509	0.0207906
803	ARF5	161.75	-0.125792	0.174831	4.25367	0.513501	0.621521
804	ARF6	1027.75	-0.0557905	0.170579	8.30369	0.140274	0.24498
805	ARFGAP1	584.183	-0.0664105	0.192404	10.684	0.0580181	0.126794
806	ARFGAP2	3056.63	-0.290433	0.158163	8.88811	0.113611	0.20902
807	ARFGAP3	82.6609	-0.191482	0.453474	18.1208	0.00279876	0.0126669
808	ARFGEF1	644.292	-0.441168	0.164585	29.9862	1.48412e-05	0.000187716
809	ARFGEF2	863.351	-0.152358	0.138231	16.1	0.00656435	0.0243546
810	ARFGEF3	5.01081	1.809	0.862187	10.7701	0.0561338	0.1236
811	ARFIP1	510.699	-0.304329	0.235966	9.72415	0.0834395	0.165817
812	ARFIP2	268.842	0.528899	0.296541	16.3707	0.00586167	0.0223511
813	ARFRP1	730.58	0.181969	0.132552	10.108	0.0722311	0.149215
814	ARG1	23790.7	0.026402	0.174524	18.1534	0.00276022	0.0125362
815	ARG2	12.4253	0.665366	0.481398	3.71647	0.590915	0.684113
816	ARGFX	0	NA	NA	NA	NA	NA
817	ARGLU1	603.541	0.174094	0.148216	18.4541	0.00242793	0.011386
818	ARHGAP1	623.519	-0.059577	0.13624	15.45	0.00860318	0.0300141
819	ARHGAP10	272.317	-0.135649	0.256796	5.06249	0.408302	0.526583
820	ARHGAP11A	29.8099	-0.516519	0.401206	6.32355	0.275997	0.398789
821	ARHGAP12	529.401	0.115058	0.183567	7.89885	0.161899	0.272362
822	ARHGAP15	4.52426	-0.453967	0.797184	9.95953	0.0763901	0.155469
823	ARHGAP17	237.664	0.0900872	0.175648	1.535	0.908996	0.934396
824	ARHGAP18	357.43	-0.0240204	0.211238	9.77128	0.0819813	0.163535
825	ARHGAP19	48.2454	-0.341292	0.244138	9.18938	0.101745	0.192724
826	ARHGAP20	17.4706	0.31076	0.370903	16.2616	0.00613567	0.0231271
827	ARHGAP21	1273.91	-0.0291574	0.254059	14.6745	0.0118478	0.0380931
828	ARHGAP22	12.9686	-0.875449	0.476896	19.573	0.00150254	0.00770241
829	ARHGAP23	39.1702	0.434043	0.279452	14.0919	0.0150362	0.0458416
830	ARHGAP24	125.175	-0.322421	0.332638	14.8786	0.0108939	0.0357555
831	ARHGAP25	32.4647	-0.247177	0.366419	9.84261	0.0798198	0.160494
832	ARHGAP26	269.935	-0.536568	0.264425	15.7506	0.00759344	0.0272179
833	ARHGAP27	53.3663	0.100444	0.289186	2.94758	0.708068	0.778531
834	ARHGAP28	2.68	1.05297	1.25038	1.84653	0.869947	0.904727
835	ARHGAP29	981.234	0.0625977	0.245245	4.85551	0.433768	0.550576
836	ARHGAP30	51.2658	-0.196024	0.366564	1.95103	0.855879	0.894087
837	ARHGAP31	66.2178	0.808577	0.393473	10.9287	0.052813	0.117903
838	ARHGAP32	125.979	0.125543	0.176076	11.7555	0.0382958	0.092176
839	ARHGAP33	111.54	-0.177273	0.327263	42.354	4.9945e-08	1.49241e-06
840	ARHGAP35	4743.2	0.304385	0.132336	9.33145	0.0965519	0.184848
841	ARHGAP36	0.0407465	0.403622	5.30442	-1.06623	1	NA
842	ARHGAP39	140.742	-0.17049	0.211823	23.7854	0.000238727	0.00178418
843	ARHGAP4	70.6373	-0.557134	0.294343	8.4533	0.132959	0.235532
844	ARHGAP40	0.568614	0.757592	3.29293	2.53475	0.771253	NA
845	ARHGAP42	339.148	0.317315	0.262311	7.90469	0.161567	0.271946
846	ARHGAP44	196.095	-0.259372	0.358856	3.20851	0.667874	0.746541
847	ARHGAP45	126.576	-0.202646	0.289174	6.88713	0.229171	0.349952
848	ARHGAP5	279.654	-0.481198	0.262434	19.5522	0.00151602	0.00775903
849	ARHGAP6	12.4821	-0.187799	0.488055	7.32894	0.197303	0.314044
850	ARHGAP8	0.0803847	-0.17346	5.30442	-0.290508	1	NA
851	ARHGAP9	24.7464	-0.31694	0.386498	5.31551	0.3786	0.499948
852	ARHGDIA	2868.9	-0.0331776	0.119638	8.82924	0.116072	0.212655
853	ARHGDIB	173.622	-0.94518	0.311337	24.1425	0.000203837	0.00157316
854	ARHGDIG	9.6639	0.869629	0.505713	12.8765	0.0245643	0.0663802
855	ARHGEF1	371.424	-0.28997	0.165941	12.8144	0.025182	0.0676175
856	ARHGEF10	24.4892	-0.342728	0.343018	17.9077	0.00306438	0.0135301
857	ARHGEF10L	215.423	0.334179	0.241872	5.30888	0.379358	0.500635
858	ARHGEF11	584.372	0.423221	0.186269	11.3011	0.0457264	0.105717
859	ARHGEF12	1677.25	0.100966	0.166481	20.4053	0.00104871	0.00576969
860	ARHGEF15	55.4721	-0.145945	0.351135	1.36949	0.927621	0.948146
861	ARHGEF16	148.081	-0.167343	0.315204	7.93561	0.15982	0.270019
862	ARHGEF17	157.649	-0.181186	0.191522	9.72821	0.0833128	0.165637
863	ARHGEF18	1406.03	-0.230196	0.150472	26.2009	8.15755e-05	0.000755419
864	ARHGEF19	0.482057	-3.20267	3.30226	2.93377	0.710197	NA
865	ARHGEF2	827.292	0.0407764	0.166168	6.36496	0.272309	0.394915
866	ARHGEF25	42.1685	-0.14878	0.399021	11.18	0.0479253	0.10945
867	ARHGEF26	13.5652	1.93686	0.754042	32.6531	4.41002e-06	6.97981e-05
868	ARHGEF28	111.195	-0.0107363	0.278854	6.37969	0.271006	0.393523
869	ARHGEF3	1089.56	0.430017	0.384698	10.9524	0.0523329	0.117157
870	ARHGEF33	0.296227	1.43922	5.13323	0.896086	0.970504	NA
871	ARHGEF37	710.418	1.34869	0.568262	71.69	4.55787e-14	5.41379e-12
872	ARHGEF38	48.2327	0.281122	0.77552	12.5312	0.0281914	0.073647
873	ARHGEF39	6.7785	-0.54349	0.642871	2.03763	0.843914	0.885559
874	ARHGEF4	26.7171	0.642012	0.387401	21.4349	0.000670259	0.00404932
875	ARHGEF40	34.0771	0.101091	0.372196	10.7934	0.055634	0.122752
876	ARHGEF5	57.116	-0.0246118	0.438677	7.94754	0.159151	0.26926
877	ARHGEF7	896.723	0.219936	0.141179	16.1032	0.00655543	0.0243327
878	ARHGEF9	28.3103	0.603383	0.294962	21.1922	0.000745051	0.00441158
879	ARID1A	905.933	-0.0873051	0.140848	14.7751	0.0113679	0.0369384
880	ARID1B	406.458	-0.217106	0.195578	3.71259	0.591491	0.684629
881	ARID2	242.356	-0.312338	0.20414	10.4134	0.064333	0.137093
882	ARID3A	36.8814	0.75292	0.383524	8.99084	0.10943	0.203446
883	ARID3B	38.7682	0.501038	0.335006	8.12084	0.1497	0.257361
884	ARID3C	0.176034	0.403587	5.30442	0.438138	0.994214	NA
885	ARID4A	216.984	-0.130778	0.246669	16.1098	0.0065376	0.0243002
886	ARID4B	225.05	-0.555386	0.220147	22.9595	0.00034363	0.00235473
887	ARID5A	122.984	0.354839	0.264535	7.87914	0.163023	0.273852
888	ARID5B	431.253	-0.48221	0.342038	27.7291	4.11156e-05	0.000428648
889	ARIH1	667.976	-0.192613	0.195281	29.1587	2.15827e-05	0.000254566
890	ARIH2	1229.92	0.228677	0.103256	30.4019	1.2291e-05	0.00016143
891	ARK2C	13.4147	0.460302	0.478088	9.07011	0.1063	0.199022
892	ARK2N	124.329	0.120546	0.238639	13.0029	0.0233519	0.0639315
893	ARL1	442.949	0.0235735	0.282141	10.5596	0.0608463	0.131449
894	ARL10	37.012	-0.546661	0.324401	9.5221	0.0899656	0.175371
895	ARL11	0.261913	0.77644	3.86527	0.597754	0.988106	NA
896	ARL13A	0	NA	NA	NA	NA	NA
897	ARL13B	43.6967	-0.321863	0.337993	13.5424	0.0187932	0.0543673
898	ARL14	7.74665	-0.435896	0.763858	3.21386	0.667054	0.74589
899	ARL14EP	122.74	-0.31753	0.271602	5.23203	0.388225	0.508813
900	ARL14EPL	0.417933	0.300361	5.28386	1.15294	0.949311	NA
901	ARL15	64.818	1.76869	0.45492	22.8339	0.000363159	0.00246024
902	ARL16	41.7436	-0.0687739	0.318012	8.23831	0.143582	0.249214
903	ARL2	59.8614	0.341808	0.265012	14.1036	0.0149646	0.0456578
904	ARL2BP	98.1447	0.348537	0.260736	17.7231	0.00331422	0.0143422
905	ARL3	148.604	-0.354948	0.184277	15.9433	0.0070077	0.025697
906	ARL4A	514.177	-0.932062	0.242051	35.6503	1.11574e-06	2.12772e-05
907	ARL4C	110.709	1.11568	0.46179	27.9291	3.75789e-05	0.000399021
908	ARL4D	22.2018	0.290562	0.519333	5.57979	0.349276	0.471172
909	ARL5A	718.005	0.0434988	0.189706	19.9805	0.00126033	0.00669485
910	ARL5B	381.815	-0.496643	0.224551	63.0353	2.86252e-12	2.422e-10
911	ARL6	9.88359	-0.0353731	0.600711	3.81764	0.575959	0.672852
912	ARL6IP1	3805.58	-0.0365378	0.293458	10.9368	0.052648	0.117679
913	ARL6IP4	591.185	0.164181	0.244725	6.84016	0.232802	0.35397
914	ARL6IP5	1245.81	-0.0165361	0.235742	10.5377	0.0613561	0.132309
915	ARL6IP6	41.1914	-0.284281	0.370923	7.80005	0.167605	0.279133
916	ARL8A	385.266	0.31672	0.186824	7.95751	0.158593	0.268486
917	ARL8B	2469.41	0.213319	0.162225	2.96712	0.705055	0.776067
918	ARL9	59.5704	-0.429645	0.385566	7.65294	0.176429	0.28912
919	ARMC1	497.672	-0.297794	0.16649	24.1722	0.000201177	0.00155636
920	ARMC10	61.0219	-0.270129	0.301141	2.49098	0.777853	0.834263
921	ARMC12	108.656	3.35176	0.739805	43.1034	3.52101e-08	1.11206e-06
922	ARMC2	1.16485	-0.761588	1.504	2.00149	0.848939	NA
923	ARMC3	0.031118	0.403622	5.30442	-1.24692	1	NA
924	ARMC5	387.969	-0.545332	0.228493	15.4625	0.00855847	0.029871
925	ARMC6	219.793	0.215955	0.170194	14.5416	0.0125115	0.0397107
926	ARMC7	65.6372	0.10784	0.333135	1.18526	0.946284	0.963301
927	ARMC8	257.413	-0.049627	0.139405	10.568	0.0606504	0.131149
928	ARMC9	68.1754	0.450354	0.312921	27.0247	5.6413e-05	0.000558089
929	ARMCX1	37.1246	1.35049	0.435865	20.9052	0.000844152	0.00485357
930	ARMCX2	19.4902	-1.16815	0.330953	31.9892	5.97048e-06	9.02082e-05
931	ARMCX3	9.51512	-0.261725	0.561452	1.16331	0.948349	0.964732
932	ARMCX4	22.2679	1.87159	0.608661	45.3584	1.22672e-08	4.48199e-07
933	ARMCX6	12.2966	-0.160375	0.475343	6.42879	0.266702	0.38995
934	ARMH1	14.7543	-0.216756	0.542564	0.418104	0.994816	0.9968
935	ARMH2	0.0747207	0.980684	5.30442	-0.370266	1	NA
936	ARMH3	318.656	-0.294459	0.162095	6.01436	0.304824	0.426935
937	ARMH4	7.87674	0.92892	0.622195	7.9527	0.158862	0.268856
938	ARMT1	836.09	0.224935	0.182984	12.2022	0.0321199	0.0811759
939	ARNT	356.608	-0.280068	0.172429	4.74313	0.448026	0.563032
940	ARNT2	111.126	0.679538	0.268096	25.4213	0.000115511	0.000998361
941	ARPC1A	707.316	0.13594	0.0950908	13.1267	0.0222202	0.0615883
942	ARPC1B	395.606	-0.390201	0.287672	3.27578	0.657552	0.738928
943	ARPC2	2079.27	-0.0235042	0.0961507	23.6711	0.000251096	0.00185703
944	ARPC3	478.452	0.0288488	0.119934	5.83977	0.322124	0.444847
945	ARPC4	913.547	0.150351	0.160208	9.98538	0.0756506	0.154217
946	ARPC5	1656.38	-0.163337	0.133803	13.075	0.0226859	0.0625769
947	ARPC5L	483.945	0.191943	0.130527	7.52144	0.184657	0.298944
948	ARPIN	92.4037	-0.354209	0.271703	15.2887	0.00919728	0.0315122
949	ARPP19	386.365	0.167304	0.182049	4.21634	0.518707	0.625797
950	ARPP21	16.4876	0.800098	0.420756	8.22394	0.144318	0.250141
951	ARRB1	86.658	0.368413	0.262652	15.3616	0.00892419	0.030813
952	ARRB2	113.64	-0.201925	0.227938	6.80177	0.235805	0.357051
953	ARRDC1	371.078	-0.0863771	0.193387	30.4612	1.1965e-05	0.000158053
954	ARRDC2	3.4479	1.8073	1.00871	7.69645	0.173777	0.28606
955	ARRDC3	334.585	-0.714023	0.391112	13.3131	0.0206148	0.0583353
956	ARRDC4	204.16	-0.122697	0.262845	5.98993	0.3072	0.429402
957	ARRDC5	13.7367	0.315696	0.531707	28.6262	2.74497e-05	0.000308373
958	ARSA	220.575	0.423801	0.227653	18.795	0.00209865	0.0100951
959	ARSB	149.823	-0.184429	0.215787	6.83596	0.233129	0.354333
960	ARSI	0.51071	-0.0825159	2.75876	2.39812	0.791754	NA
961	ARSJ	1.75531	0.943107	1.55718	6.65436	0.24764	0.369644
962	ARSK	164.895	-0.0494581	0.282365	5.33559	0.376311	0.497939
963	ART1	3.89045	2.0479	0.894248	9.03782	0.107565	0.20093
964	ART3	31.1981	0.680944	0.378477	9.88093	0.0786803	0.158883
965	ART4	800.224	0.0539401	0.161904	28.8162	2.51942e-05	0.000286953
966	ART5	2.3129	0.597485	1.14267	1.19567	0.945292	0.962597
967	ARTN	0.648071	0.691789	2.35988	5.62321	0.344624	NA
968	ARV1	285.132	0.38287	0.171106	21.1795	0.000749177	0.00443205
969	ARVCF	38.476	-0.0574406	0.353401	20.1793	0.00115652	0.00626212
970	ARX	4.54061	-0.404175	0.706159	8.5341	0.129154	0.230322
971	AS3MT	4634.11	0.0809728	0.274833	12.6451	0.0269417	0.0711656
972	ASAH1	6613.92	-0.235095	0.190315	26.6077	6.80025e-05	0.000651106
973	ASAH2	23.5108	0.149427	0.451545	12.4999	0.0285438	0.0743712
974	ASAP1	90.7166	0.191703	0.258652	2.03365	0.84447	0.885911
975	ASAP2	80.1237	-0.678248	0.306066	18.1869	0.00272104	0.0123919
976	ASAP3	189.102	-0.0822123	0.33923	52.47	4.32067e-10	2.23341e-08
977	ASB1	575.985	0.0763425	0.167925	4.33067	0.502854	0.612253
978	ASB10	1.80143	2.29068	1.43117	10.6899	0.057888	0.126613
979	ASB11	6.51458	2.20273	0.679121	15.9861	0.0068838	0.0253178
980	ASB12	0.314149	-0.497549	3.68091	1.24682	0.940308	NA
981	ASB13	973.031	0.527044	0.194924	17.2354	0.00407425	0.0168678
982	ASB14	1.07624	3.64598	1.87824	6.65715	0.247412	NA
983	ASB15	49.0639	0.411105	0.454313	15.1428	0.00976914	0.0330559
984	ASB16	2.72315	2.00551	1.18185	5.61415	0.345592	0.467654
985	ASB17	0	NA	NA	NA	NA	NA
986	ASB2	42.0455	1.82907	0.477847	23.8571	0.000231274	0.00173818
987	ASB3	179.817	-0.219068	0.24323	12.4157	0.0295149	0.076099
988	ASB4	1.45153	1.74955	1.47069	2.17887	0.823882	0.870104
989	ASB5	30.6065	-0.311811	0.425359	7.63547	0.177503	0.290347
990	ASB6	82.9518	0.043922	0.272187	12.4797	0.0287738	0.0747887
991	ASB7	119.097	-0.131088	0.223503	2.82822	0.726448	0.792991
992	ASB8	545.784	-0.605635	0.170197	21.6388	0.000613186	0.00376244
993	ASB9	3.80668	-2.7758	1.49071	6.86987	0.2305	0.351267
994	ASCC1	128.964	-0.42032	0.186984	13.4904	0.0191923	0.0552734
995	ASCC2	481.421	0.0111834	0.173135	1.63912	0.896478	0.924188
996	ASCC3	662.42	-0.0568989	0.188073	15.9203	0.00707534	0.0258742
997	ASCL1	4.53637	1.80098	1.54964	13.5606	0.0186549	0.0540938
998	ASCL2	0.378512	-3.48471	3.46004	2.05511	0.841468	NA
999	ASCL3	0	NA	NA	NA	NA	NA
1000	ASCL4	1.58395	0.915872	2.15588	6.17643	0.289428	0.411831
1001	ASCL5	0	NA	NA	NA	NA	NA
1002	ASDURF	111.213	-0.433816	0.281759	14.4004	0.0132563	0.0415416
1003	ASF1A	119.016	-0.617782	0.273657	11.2526	0.0465958	0.107363
1004	ASF1B	11.6251	-0.271774	0.46575	10.9655	0.0520681	0.116694
1005	ASGR1	2718.03	-0.845792	0.198387	26.3484	7.6371e-05	0.000713802
1006	ASH1L	491.807	-0.115471	0.233407	7.90527	0.161534	0.271945
1007	ASH2L	398.943	-0.264473	0.155721	8.12758	0.149343	0.25685
1008	ASIC1	17.9229	-0.0236945	0.480868	0.399377	0.995347	0.997208
1009	ASIC2	4.51675	0.68673	0.736465	11.7038	0.0390799	0.0936706
1010	ASIC3	0.327609	0.827121	2.90595	1.19775	0.945093	NA
1011	ASIC4	4.25644	0.948442	0.838861	6.12685	0.294071	0.416649
1012	ASIC5	2.41525	2.51951	1.41254	10.1318	0.0715852	0.148204
1013	ASIP	1.39374	0.346132	1.56838	9.51175	0.0903125	0.175941
1014	ASL	22719.6	0.268672	0.174152	5.87964	0.318107	0.440852
1015	ASMT	0.0362122	-0.17345	5.30442	-1.14068	1	NA
1016	ASMTL	5229.91	0.318289	0.199409	11.1006	0.0494223	0.112081
1017	ASNS	11.4856	0.582807	0.518134	4.46201	0.484982	0.596524
1018	ASNSD1	1086.4	-0.457008	0.181747	18.7845	0.00210807	0.0101313
1019	ASPA	14.7414	0.0959944	0.635134	3.47612	0.627004	0.715077
1020	ASPDH	2486.5	0.477173	0.223422	14.3372	0.0136033	0.0424716
1021	ASPG	2351.72	0.168127	0.151596	11.5914	0.0408356	0.0968393
1022	ASPH	717.261	-0.309256	0.213164	5.28104	0.382553	0.503226
1023	ASPHD1	10.1698	1.06796	0.570486	16.4741	0.0056131	0.021629
1024	ASPHD2	13.6179	0.793281	0.443871	18.3712	0.00251544	0.0116876
1025	ASPM	14.1087	-0.311144	0.4777	6.69111	0.244645	0.366363
1026	ASPN	64.8706	-1.06069	0.462908	11.6091	0.0405549	0.0962588
1027	ASPRV1	0.16903	0.00670169	5.29942	0.510508	0.991733	NA
1028	ASPSCR1	877.925	0.316309	0.194431	16.5518	0.00543313	0.0210516
1029	ASRGL1	17.7479	0.837173	0.440274	17.9248	0.00304212	0.0134465
1030	ASS1	119084	0.291249	0.183704	6.38454	0.270579	0.392974
1031	ASTE1	156.578	-0.278073	0.231015	12.1523	0.0327594	0.0822617
1032	ASTL	0	NA	NA	NA	NA	NA
1033	ASTN1	34.9589	0.558814	0.391426	14.2538	0.014075	0.0435805
1034	ASTN2	9.37697	0.123017	0.51436	5.74929	0.331384	0.453814
1035	ASXL1	369.794	-0.286776	0.225149	6.79725	0.236161	0.357403
1036	ASXL2	491.052	0.00684871	0.155436	4.09803	0.53539	0.639113
1037	ASXL3	3.16454	-0.159736	0.919805	2.39401	0.792366	0.845878
1038	ASZ1	2.77543	1.35678	1.72312	14.1799	0.0145064	0.0445046
1039	ATAD1	782.357	0.105446	0.22089	17.4984	0.00364538	0.0155158
1040	ATAD2	16.1403	-0.364283	0.384534	5.75545	0.330746	0.453096
1041	ATAD2B	126.759	-0.434332	0.207769	51.5013	6.82702e-10	3.28948e-08
1042	ATAD5	21.9399	-0.46764	0.435992	8.14329	0.148514	0.255786
1043	ATAT1	107.391	0.231674	0.226768	9.64742	0.0858645	0.169265
1044	ATCAY	66.7852	0.641894	0.337723	17.392	0.00381337	0.0160355
1045	ATE1	489.799	0.113912	0.181352	3.06838	0.689444	0.764537
1046	ATF1	316.079	-0.138361	0.217916	17.463	0.00370049	0.0156881
1047	ATF2	442.376	-0.385901	0.199998	27.7315	4.10721e-05	0.000428598
1048	ATF3	138.005	0.657123	0.70763	33.9999	2.38111e-06	4.0896e-05
1049	ATF4	2608.91	0.145082	0.292106	31.1923	8.58299e-06	0.00012254
1050	ATF5	848.883	0.416009	0.293214	12.9397	0.0239501	0.0651364
1051	ATF6	997.073	-0.0127746	0.178892	13.1363	0.0221341	0.0614228
1052	ATF6B	729.052	-0.0379675	0.108441	16.1379	0.00646121	0.0241223
1053	ATF7IP	653.674	-0.529977	0.158055	25.767	9.90139e-05	0.000881855
1054	ATF7IP2	3.84596	0.0875056	0.997468	3.31549	0.65147	0.734229
1055	ATG10	242.936	0.442603	0.19423	6.78819	0.236875	0.358097
1056	ATG101	416.932	0.363089	0.168025	8.37118	0.136931	0.240684
1057	ATG12	510.691	-0.249444	0.216241	32.7908	4.1411e-06	6.61095e-05
1058	ATG13	2732.46	-0.486797	0.181357	15.5789	0.00815491	0.0286993
1059	ATG14	474.005	0.123863	0.245361	11.6409	0.0400543	0.0953662
1060	ATG16L1	505.17	0.0345615	0.170797	18.4302	0.00245285	0.0114624
1061	ATG16L2	45.4006	-0.578965	0.438683	12.5877	0.0275649	0.0724314
1062	ATG2A	1013	-0.170363	0.166966	8.29988	0.140465	0.245233
1063	ATG2B	2406.91	0.0389423	0.133114	15.8519	0.00727991	0.02643
1064	ATG3	923.934	0.214409	0.153869	8.52382	0.129632	0.231013
1065	ATG4A	355.414	-0.0974525	0.166823	2.73159	0.741283	0.804649
1066	ATG4B	577.19	0.783554	0.196976	50.7981	9.51274e-10	4.45851e-08
1067	ATG4C	260.954	0.300688	0.226869	4.97305	0.419178	0.537205
1068	ATG4D	314.311	0.0106035	0.162717	7.21914	0.204846	0.323012
1069	ATG5	498.593	0.44396	0.184276	13.4894	0.0191994	0.0552838
1070	ATG7	323.881	-0.2059	0.176018	16.9321	0.00463035	0.0186187
1071	ATG9A	1984.24	-0.470339	0.165732	18.6861	0.00219878	0.0105107
1072	ATG9B	0.937202	0.0683598	1.94256	4.37287	0.497071	NA
1073	ATIC	293.987	0.305792	0.210425	14.2905	0.0138657	0.04309
1074	ATL1	18.7533	0.391769	0.402209	6.36374	0.272417	0.395
1075	ATL2	2564.01	-0.220583	0.175528	8.5643	0.127757	0.228583
1076	ATL3	1030.95	0.369074	0.185173	7.24875	0.202788	0.320521
1077	ATM	173.735	-0.591326	0.249924	22.9601	0.000343541	0.00235473
1078	ATMIN	273.269	-0.0465555	0.245445	5.28267	0.382366	0.50302
1079	ATN1	219.628	0.409529	0.188844	8.78575	0.117921	0.2152
1080	ATOH1	0	NA	NA	NA	NA	NA
1081	ATOH7	0.251968	0.195978	5.29913	0.55567	0.989943	NA
1082	ATOH8	147.084	-0.547243	0.364079	20.2593	0.00111715	0.00609332
1083	ATOSA	846.659	0.112923	0.21336	3.73333	0.588411	0.682358
1084	ATOSB	220.257	0.0132007	0.231902	9.20341	0.101221	0.191822
1085	ATOX1	537.629	0.625032	0.223484	14.5239	0.0126026	0.0399471
1086	ATP10A	16.9907	-0.332917	0.473399	3.42679	0.634493	0.720652
1087	ATP10B	9.58923	0.40633	0.637187	4.79194	0.441797	0.557833
1088	ATP10D	295.958	0.356662	0.352333	9.65871	0.0855037	0.168865
1089	ATP11A	674.604	0.0329059	0.341475	7.2743	0.201027	0.318363
1090	ATP11B	878.776	0.104697	0.190325	14.9462	0.0105948	0.0349929
1091	ATP11C	88.0085	-0.340778	0.316498	27.1063	5.43861e-05	0.000541845
1092	ATP12A	0.231065	0.279071	4.65146	0.361101	0.996334	NA
1093	ATP13A1	1503.86	-0.240177	0.136983	9.08152	0.105856	0.19827
1094	ATP13A2	792.868	0.0474978	0.165175	8.16315	0.147471	0.254507
1095	ATP13A3	1346.4	-0.0648198	0.220565	23.1468	0.000316434	0.00220357
1096	ATP13A4	52.5448	0.611313	0.342786	4.18867	0.522585	0.628917
1097	ATP13A5	1.64254	1.45244	1.57774	6.08047	0.298467	0.421076
1098	ATP1A1	14505.5	-0.167147	0.167739	13.9479	0.0159437	0.0479624
1099	ATP1A2	156.793	0.92793	0.28295	36.0959	9.08757e-07	1.77944e-05
1100	ATP1A3	329.629	0.656944	0.294253	24.7065	0.000158742	0.00128925
1101	ATP1B1	8273.77	-0.246401	0.196432	11.7768	0.0379768	0.0916003
1102	ATP1B2	73.3952	0.506158	0.2831	17.1423	0.00423771	0.0173834
1103	ATP1B3	109.746	-0.129217	0.209054	4.66306	0.458367	0.572816
1104	ATP1B4	0.88947	1.8185	2.5897	3.92738	0.559918	NA
1105	ATP23	196.154	0.733414	0.202316	16.4253	0.005729	0.0219637
1106	ATP2A1	572.165	1.81136	0.773132	5.85895	0.320186	0.442894
1107	ATP2A2	5091.59	0.141918	0.257953	14.2168	0.0142893	0.0440236
1108	ATP2A3	95.0534	-0.748875	0.278247	13.5533	0.0187102	0.0541862
1109	ATP2B1	383.455	-0.129181	0.213959	23.5792	0.000261493	0.0019088
1110	ATP2B2	115.029	0.660198	0.305662	14.801	0.0112474	0.0365943
1111	ATP2B3	28.3411	0.657692	0.312208	23.1202	0.000320167	0.00222387
1112	ATP2B4	198.365	1.6263	0.310941	46.2788	7.96925e-09	3.05761e-07
1113	ATP2C1	797.38	-0.174126	0.194541	30.5972	1.12487e-05	0.00015082
1114	ATP2C2	13.6161	2.02374	0.671268	27.2459	5.10848e-05	0.000512954
1115	ATP4A	0.841987	-0.643596	2.87036	8.75176	0.119385	NA
1116	ATP4B	0.664985	-0.486433	2.25394	4.23162	0.516573	NA
1117	ATP5F1A	23433.7	0.0537194	0.16904	9.17391	0.102325	0.19341
1118	ATP5F1B	29411	0.147917	0.146233	6.21692	0.28568	0.408492
1119	ATP5F1C	9159.85	-0.0369221	0.120844	15.1352	0.00979993	0.0331462
1120	ATP5F1D	1474.98	0.362007	0.228688	16.799	0.00489717	0.0194244
1121	ATP5F1E	937.182	0.747734	0.607842	18.6082	0.00227324	0.0108042
1122	ATP5IF1	186.796	0.844189	0.386278	9.0847	0.105733	0.198131
1123	ATP5MC1	6636.79	0.303253	0.174112	11.9334	0.0357118	0.0876896
1124	ATP5MC2	1177.57	0.0376443	0.137596	4.4528	0.486223	0.597777
1125	ATP5MC3	5283.86	0.426371	0.141009	20.0048	0.00124715	0.00664763
1126	ATP5ME	1362.41	0.213236	0.157431	5.71381	0.33507	0.457654
1127	ATP5MF	1573.1	0.309761	0.164977	7.92204	0.160585	0.270831
1128	ATP5MG	2915.31	0.358303	0.125864	19.7509	0.00139164	0.00724484
1129	ATP5MJ	1741.27	0.315147	0.167122	10.5034	0.0621649	0.133587
1130	ATP5MK	1159.96	0.115785	0.127812	12.3457	0.0303465	0.0777576
1131	ATP5PB	5820.05	0.126671	0.135651	8.56547	0.127702	0.228511
1132	ATP5PD	3834.23	0.285087	0.125311	14.2	0.0143878	0.0442592
1133	ATP5PF	2451.08	0.232701	0.14034	9.80084	0.081079	0.162279
1134	ATP5PO	6209.06	0.353567	0.137266	10.8965	0.053472	0.118975
1135	ATP6AP1	799.311	-0.0639658	0.100895	6.45319	0.264583	0.387875
1136	ATP6AP2	791.695	0.0562564	0.181735	14.4107	0.0132008	0.0414162
1137	ATP6V0A1	739.615	0.286013	0.128976	16.6186	0.00528302	0.020619
1138	ATP6V0A2	492.168	-0.113306	0.120893	11.8335	0.0371423	0.0901419
1139	ATP6V0A4	4.31966	3.01572	1.99779	11.5241	0.0419241	0.0989261
1140	ATP6V0B	876.675	-0.170787	0.114284	10.9668	0.0520413	0.116667
1141	ATP6V0C	1110.52	0.253833	0.220764	13.6712	0.0178389	0.052351
1142	ATP6V0D1	1059.52	-0.0337182	0.153868	4.82141	0.438062	0.554336
1143	ATP6V0D2	0.0794058	-0.461977	5.30442	-0.378945	1	NA
1144	ATP6V0E1	526.575	0.138665	0.155119	11.1797	0.0479304	0.10945
1145	ATP6V0E2	34.2232	0.218026	0.292082	32.4499	4.83871e-06	7.53309e-05
1146	ATP6V1A	720.513	0.0468474	0.196024	17.0459	0.00441355	0.0179399
1147	ATP6V1B1	0.256022	-2.81089	5.24678	1.2867	0.936294	NA
1148	ATP6V1B2	898.194	0.0186995	0.145456	0.972107	0.964784	0.976323
1149	ATP6V1C1	703.135	-0.181242	0.118487	12.6836	0.0265311	0.0702744
1150	ATP6V1C2	0.947472	2.26166	2.51267	5.88153	0.317917	NA
1151	ATP6V1D	315.476	-0.241301	0.194419	19.2366	0.00173647	0.00867922
1152	ATP6V1E1	872.964	0.103369	0.107333	16.418	0.00574667	0.0220024
1153	ATP6V1E2	0	NA	NA	NA	NA	NA
1154	ATP6V1F	546.383	0.166933	0.195672	8.40074	0.135489	0.239013
1155	ATP6V1FNB	2.30961	-0.00340334	1.00646	2.22958	0.816552	0.864864
1156	ATP6V1G1	1904.57	0.598124	0.211518	14.3607	0.0134737	0.0421511
1157	ATP6V1G2	71.7304	0.757568	0.311287	12.8672	0.0246551	0.0665473
1158	ATP6V1G3	0.0409895	0.403622	5.30442	-1.06202	1	NA
1159	ATP6V1H	483.245	0.0654717	0.179993	1.16754	0.947953	0.964573
1160	ATP7A	100.977	-0.0196797	0.283138	28.8264	2.50788e-05	0.000286137
1161	ATP7B	1927.04	-0.0973164	0.258486	5.79878	0.326294	0.448578
1162	ATP8A1	44.8741	-0.373699	0.306798	20.5238	0.000996211	0.00554261
1163	ATP8A2	2305.36	-0.115224	0.146049	4.96159	0.420586	0.538667
1164	ATP8B1	1520.76	-0.509555	0.238954	23.5393	0.000266138	0.00192905
1165	ATP8B2	105.592	0.318799	0.265013	9.83153	0.080152	0.160905
1166	ATP8B3	0.419261	1.41356	3.15753	1.24833	0.940157	NA
1167	ATP8B4	16.334	-1.02575	0.70891	10.9971	0.0514379	0.115754
1168	ATP9A	2247.99	-0.0123164	0.223563	6.97402	0.222579	0.342837
1169	ATP9B	381.028	-0.180988	0.179943	6.92488	0.226287	0.34682
1170	ATPAF1	1977.24	-0.26544	0.159205	23.3758	0.000286049	0.00204379
1171	ATPAF2	646.849	0.258351	0.142843	24.4533	0.000177617	0.00140612
1172	ATPSCKMT	318.685	-0.831584	0.241991	25.0719	0.000134952	0.0011323
1173	ATR	233.901	0.569205	0.399956	22.3141	0.000456281	0.00297456
1174	ATRAID	470.155	-0.0800977	0.185361	4.76125	0.445707	0.561183
1175	ATRIP	122.548	-0.355454	0.230446	7.24567	0.203001	0.320701
1176	ATRN	5578.79	0.247538	0.190081	8.73549	0.120091	0.218367
1177	ATRNL1	28.4466	-0.0941653	0.285066	3.91214	0.562134	0.661513
1178	ATRX	480.396	-0.334433	0.220415	37.9735	3.81982e-07	8.69794e-06
1179	ATXN1	116.981	0.059073	0.310861	18.0816	0.00284583	0.0128222
1180	ATXN10	620.953	-0.22835	0.155986	5.85636	0.320448	0.443146
1181	ATXN1L	319.514	-0.128172	0.210405	18.1398	0.00277621	0.0125897
1182	ATXN2	742.195	-0.519173	0.150536	22.1406	0.000492341	0.00316721
1183	ATXN2L	816.399	0.0697171	0.14464	9.13672	0.103734	0.195318
1184	ATXN3	207.484	0.0609329	0.186678	0.849347	0.97378	0.98289
1185	ATXN7	94.9331	-0.45156	0.251579	10.1844	0.0701765	0.145991
1186	ATXN7L1	125.375	-1.0428	0.274427	27.7648	4.04609e-05	0.000423385
1187	ATXN7L2	36.1761	0.399667	0.292894	2.3035	0.805753	0.856517
1188	ATXN7L3	404.253	-0.0191204	0.163983	16.1231	0.00650135	0.0242181
1189	ATXN7L3B	395.463	-0.0484678	0.210402	6.51822	0.259006	0.381508
1190	AUH	1059.69	0.0512872	0.151335	3.51078	0.621757	0.710662
1191	AUNIP	7.69061	0.40863	0.678241	1.78514	0.878003	0.910882
1192	AUP1	2833.61	0.27455	0.127585	10.0666	0.0733712	0.15093
1193	AURKA	22.2092	0.160781	0.405168	3.82378	0.575056	0.672041
1194	AURKAIP1	68.6112	0.157133	0.288208	3.63426	0.603177	0.694902
1195	AURKB	10.793	-0.516974	0.476553	16.35	0.0059128	0.0224837
1196	AURKC	6.37773	-0.426429	0.757852	8.34202	0.138366	0.242598
1197	AUTS2	541.795	0.111006	0.339512	4.106	0.534257	0.638045
1198	AVEN	88.8952	-0.0142316	0.291538	3.34104	0.647565	0.731365
1199	AVIL	2.08793	-0.254916	1.17099	0.898985	0.970295	0.980111
1200	AVL9	187.427	-0.211204	0.203243	12.8979	0.0243541	0.0659785
1201	AVP	7.85952	1.15197	1.41152	56.825	5.49485e-11	3.41063e-09
1202	AVPI1	316.29	-0.169491	0.268296	7.62108	0.178392	0.291511
1203	AVPR1A	10.8248	-0.420876	0.557945	6.07069	0.299401	0.421801
1204	AVPR1B	0.0426858	0.288181	5.30442	-0.885492	1	NA
1205	AVPR2	1.23958	-2.16673	1.58483	3.19725	0.669606	NA
1206	AWAT1	0	NA	NA	NA	NA	NA
1207	AXDND1	0.109568	0.115085	5.30442	-0.205937	1	NA
1208	AXIN1	564.525	-0.0263745	0.167033	17.9492	0.00301074	0.0133556
1209	AXIN2	130.565	-0.462817	0.278495	11.2069	0.047428	0.108701
1210	AXL	57.9324	-0.52599	0.352973	5.19709	0.392304	0.512571
1211	AZGP1	57032.6	-0.0429082	0.137787	31.8344	6.40723e-06	9.59056e-05
1212	AZI2	463.989	0.177165	0.196258	13.7042	0.017602	0.0517406
1213	AZIN1	1639.95	0.0139533	0.26444	7.29005	0.199947	0.317154
1214	AZIN2	6.45384	0.323661	0.601881	7.60339	0.179491	0.292765
1215	AZU1	15.8255	-0.964964	0.687547	6.75367	0.239614	0.36088
1216	B2M	29179.3	0.0814732	0.202964	8.94127	0.11143	0.206162
1217	B3GALNT1	6.34111	0.742187	0.643449	3.25952	0.660045	0.740622
1218	B3GALNT2	334.419	1.15086	0.702139	18.5373	0.00234323	0.0110773
1219	B3GALT1	4.63931	0.60563	0.69997	3.99036	0.550804	0.652042
1220	B3GALT2	10.7943	0.842691	0.543925	7.98442	0.157096	0.266512
1221	B3GALT4	11.5435	1.61532	0.648157	24.939	0.000143161	0.00118815
1222	B3GALT6	112.78	-0.606513	0.318324	5.31102	0.379113	0.500379
1223	B3GALT9	1.40154	-2.4085	1.48907	5.20526	0.391348	0.511863
1224	B3GAT1	86.669	0.633881	0.348662	13.8265	0.0167498	0.0498095
1225	B3GAT2	5.55451	-0.0811647	0.774499	0.574172	0.989155	0.992923
1226	B3GAT3	238.957	0.144968	0.15042	4.2241	0.517622	0.624909
1227	B3GLCT	30.3654	0.387573	0.374382	3.4769	0.626885	0.714992
1228	B3GNT2	102.461	-0.615474	0.240113	62.3808	3.91096e-12	3.24832e-10
1229	B3GNT3	35.6662	-0.596139	0.379718	12.4763	0.0288134	0.0748495
1230	B3GNT5	10.4262	-0.48647	0.593138	8.6745	0.122773	0.221963
1231	B3GNT7	19.6014	0.543149	0.541634	10.5094	0.0620232	0.133401
1232	B3GNT8	7.08993	-0.613323	0.759173	0.625412	0.98681	0.991125
1233	B3GNT9	546.476	-0.220689	0.331592	19.6411	0.00145908	0.00752285
1234	B3GNTL1	42.1218	-0.142533	0.298199	5.18378	0.393866	0.513902
1235	B4GALNT1	41.4588	-0.00474607	0.279059	7.39615	0.192805	0.308596
1236	B4GALNT3	16.0418	0.217974	0.45896	5.78074	0.328142	0.450324
1237	B4GALNT4	15.5888	0.206811	0.433798	3.82643	0.574667	0.671801
1238	B4GALT1	585.944	0.238925	0.181848	4.84388	0.43523	0.551838
1239	B4GALT2	12.5956	-0.275308	0.452797	5.5108	0.356763	0.478501
1240	B4GALT3	114.237	-0.0197127	0.28327	6.22742	0.284715	0.407286
1241	B4GALT4	42.7051	-0.372968	0.361466	2.72609	0.742125	0.805346
1242	B4GALT5	216.492	-0.332007	0.214115	14.7878	0.0113084	0.0367705
1243	B4GALT6	22.0041	1.35445	0.545091	11.322	0.0453572	0.105051
1244	B4GALT7	543.12	0.215703	0.181569	18.9634	0.00195251	0.00951456
1245	B4GAT1	333.139	0.137619	0.221821	11.7518	0.0383512	0.0922678
1246	B9D1	103.013	-0.375726	0.252336	4.11402	0.533119	0.637206
1247	B9D2	53.6538	-0.152414	0.286204	7.78957	0.16822	0.279718
1248	BAALC	17.456	0.326689	0.416971	4.561	0.471764	0.584965
1249	BAAT	4247.85	-0.161852	0.28274	24.1885	0.000199733	0.00154743
1250	BABAM1	337.212	-0.237148	0.138169	10.8609	0.0542077	0.120232
1251	BABAM2	589.148	0.156442	0.16116	7.71878	0.17243	0.284482
1252	BACE1	65.7964	-0.266257	0.372238	16.1094	0.00653845	0.0243002
1253	BACE2	50.3516	-0.821695	0.398342	8.84431	0.115437	0.211774
1254	BACH1	482.361	-0.320549	0.281682	18.476	0.00240533	0.0113131
1255	BACH2	18.8038	-1.01269	0.400893	12.9728	0.0236354	0.0644769
1256	BAD	103.373	0.159919	0.188277	7.12201	0.211723	0.330935
1257	BAG1	634.445	0.460513	0.225896	11.1316	0.0488324	0.111043
1258	BAG2	6.03718	0.839726	0.720417	15.0127	0.0103081	0.0342736
1259	BAG3	773.803	0.0572037	0.23327	61.1521	7.02335e-12	5.42824e-10
1260	BAG4	284.693	-0.241862	0.21848	12.1561	0.0327102	0.0822024
1261	BAG5	478.566	-0.103087	0.102881	21.1124	0.000771376	0.0045324
1262	BAG6	2836.11	-0.0172148	0.125946	3.94183	0.557821	0.658022
1263	BAHCC1	127.888	0.27935	0.37348	11.6212	0.0403641	0.0959334
1264	BAHD1	153.027	0.208034	0.200991	5.43035	0.365644	0.487202
1265	BAIAP2	1005.21	0.253099	0.185872	5.07974	0.406227	0.52493
1266	BAIAP2L1	2008.91	-0.255179	0.167985	9.43412	0.0929519	0.179581
1267	BAIAP2L2	1.46386	0.457009	1.63522	3.08052	0.687574	0.762933
1268	BAIAP3	9.68745	0.643039	0.645622	4.05034	0.542192	0.644789
1269	BAK1	165.962	-0.518466	0.283521	11.5132	0.0421022	0.0991991
1270	BAMBI	258.099	0.245995	0.252947	45.338	1.2385e-08	4.51477e-07
1271	BANF1	1739.34	-0.12471	0.16257	1.90025	0.862768	0.899297
1272	BANF2	0	NA	NA	NA	NA	NA
1273	BANP	118.724	0.847855	0.32317	46.0931	8.69419e-09	3.28865e-07
1274	BAP1	1097.41	-0.120851	0.0965257	3.36781	0.643478	0.728284
1275	BARD1	17.688	-1.43258	0.371102	27.8978	3.81115e-05	0.000404409
1276	BARHL1	0.0426858	0.288181	5.30442	-0.885492	1	NA
1277	BARHL2	0.287638	0.13448	3.32817	0.674858	0.98432	NA
1278	BARX1	0.481791	0.288167	4.60453	1.91404	0.860906	NA
1279	BARX2	0.672818	1.71806	2.18189	4.0817	0.537715	NA
1280	BASP1	42.7166	0.259336	0.318605	5.77765	0.328459	0.450654
1281	BATF	13.9285	-0.586357	0.5002	2.70535	0.7453	0.807864
1282	BATF2	9.70026	-0.547737	0.584308	3.28316	0.656421	0.73807
1283	BATF3	21.8439	-0.448115	0.590853	7.49284	0.18649	0.300884
1284	BAX	189.682	-0.206536	0.212539	5.19554	0.392485	0.512705
1285	BAZ1A	305.312	-0.142435	0.252355	24.7285	0.000157195	0.00128017
1286	BAZ1B	1619.85	-0.151989	0.124446	28.6444	2.72251e-05	0.000306492
1287	BAZ2A	583.205	-0.0194819	0.201236	17.0854	0.00434071	0.0177058
1288	BAZ2B	237.704	-0.506565	0.231495	24.6148	0.000165336	0.00132831
1289	BBC3	66.9878	-0.56556	0.359104	5.69283	0.337265	0.459675
1290	BBIP1	95.0573	-0.0523635	0.223401	2.18654	0.822777	0.869166
1291	BBLN	104.742	0.395882	0.254673	9.34835	0.0959506	0.183982
1292	BBOF1	19.3598	-0.489027	0.673736	3.72048	0.590319	0.683617
1293	BBOX1	844.094	0.201395	0.207296	15.2984	0.00916041	0.0314194
1294	BBS1	123.722	-0.36897	0.261852	7.49392	0.186421	0.300864
1295	BBS10	26.8063	-0.300786	0.389624	7.1296	0.211179	0.330303
1296	BBS12	17.2295	0.233375	0.64885	10.0658	0.0733911	0.150951
1297	BBS2	144.519	-0.059185	0.219146	4.24916	0.514129	0.621982
1298	BBS4	190.556	-0.0373468	0.200566	22.2986	0.000459403	0.00298761
1299	BBS5	56.0212	0.00508207	0.311741	5.49619	0.358364	0.479928
1300	BBS7	125.269	-0.408822	0.263776	13.0986	0.0224721	0.0621449
1301	BBS9	239.072	-0.105367	0.196501	12.008	0.034678	0.0858195
1302	BBX	120.336	-0.658294	0.478665	7.00968	0.219922	0.340177
1303	BCAM	212.356	-0.253347	0.383552	12.1684	0.0325521	0.0819461
1304	BCAN	17.7519	1.06013	0.513623	10.3507	0.0658877	0.13959
1305	BCAP29	708.575	0.24723	0.209115	18.1002	0.00282338	0.0127549
1306	BCAP31	2164.47	0.141862	0.100747	6.82063	0.234326	0.355615
1307	BCAR1	798.8	0.464978	0.293614	11.4269	0.0435431	0.101729
1308	BCAR3	261.486	-0.116349	0.280983	9.21503	0.100789	0.191273
1309	BCAS1	7.58472	0.732568	0.767339	4.72367	0.450526	0.565347
1310	BCAS2	282.043	0.0309791	0.152092	2.53364	0.77142	0.829189
1311	BCAS3	409.751	-0.116279	0.162182	14.0485	0.0153045	0.0464572
1312	BCAT1	57.1928	0.582655	0.328543	15.976	0.00691291	0.0254132
1313	BCAT2	149.575	0.385784	0.252315	13.228	0.0213333	0.0597585
1314	BCCIP	704.91	-0.197941	0.21259	5.24502	0.386716	0.507663
1315	BCDIN3D	151.461	0.079134	0.186272	14.8923	0.0108324	0.0355828
1316	BCHE	143.926	-1.36477	0.805836	5.57559	0.349728	0.471664
1317	BCKDHA	5565.79	0.165315	0.163761	9.28556	0.098202	0.187538
1318	BCKDHB	3405.73	0.115083	0.135776	9.46574	0.0918684	0.178259
1319	BCKDK	423.434	0.0651269	0.202629	2.42995	0.787006	0.841665
1320	BCL10	146.536	-0.155448	0.184919	9.88589	0.0785337	0.15869
1321	BCL11A	16.6825	0.15521	0.377865	4.78883	0.442192	0.558156
1322	BCL11B	13.3479	1.16124	0.94779	12.0017	0.0347643	0.0859669
1323	BCL2	59.688	-0.467958	0.336183	4.04128	0.543488	0.645806
1324	BCL2L1	686.263	0.719261	0.323405	22.5186	0.000417129	0.00275958
1325	BCL2L11	98.0242	-0.862876	0.302872	19.8288	0.00134565	0.00705794
1326	BCL2L12	145.711	0.149271	0.177317	7.28013	0.200627	0.317917
1327	BCL2L13	825.514	-0.0957321	0.128907	47.2157	5.13436e-09	2.0635e-07
1328	BCL2L14	53.2234	0.949614	0.29326	25.3872	0.000117279	0.00101201
1329	BCL2L15	14.7603	-0.560038	0.509918	2.78061	0.733764	0.798753
1330	BCL3	55.3741	-0.60397	0.646621	8.66671	0.123119	0.222333
1331	BCL6	368.263	-0.0417559	0.415809	18.8831	0.00202093	0.00977978
1332	BCL6B	12.7547	-0.404146	0.541433	2.19334	0.821797	0.868416
1333	BCL7A	54.4211	-0.875883	0.392832	29.4611	1.88247e-05	0.000228224
1334	BCL7B	241.988	0.442999	0.221587	12.3167	0.0306964	0.0784665
1335	BCL7C	637.745	1.41908	0.347991	28.9458	2.37626e-05	0.000273993
1336	BCL9	80.0483	-0.363386	0.261189	27.2134	5.18352e-05	0.000519515
1337	BCL9L	1060.34	0.0214282	0.1625	24.5003	0.000173953	0.00138325
1338	BCLAF1	440.192	-0.337603	0.240882	21.484	0.000656043	0.00397683
1339	BCLAF3	74.9542	-0.0695807	0.204068	18.9783	0.00194012	0.00946852
1340	BCO1	638.217	0.618035	0.275736	14.578	0.0123263	0.0393014
1341	BCO2	382.165	1.07833	0.288472	29.2661	2.05606e-05	0.000245567
1342	BCOR	156.125	-0.508442	0.250001	16.8755	0.00474199	0.0189538
1343	BCORL1	86.419	0.526746	0.377812	5.20828	0.390994	0.511525
1344	BCR	512.312	0.213836	0.201364	19.3065	0.00168507	0.00845746
1345	BDH2	0.472951	3.08113	1.95294	3.51303	0.621418	NA
1346	BDKRB1	1.72238	2.91889	1.72315	5.92424	0.31366	0.436163
1347	BDKRB2	0.601136	1.06795	2.29709	4.11403	0.533118	NA
1348	BDNF	3.50979	2.24996	0.971675	7.01473	0.219547	0.339925
1349	BDP1	144.787	0.0908167	0.351768	10.729	0.0570256	0.125126
1350	BEAN1	0	NA	NA	NA	NA	NA
1351	BECN1	930.212	-0.0423716	0.113259	6.29706	0.278378	0.401147
1352	BECN2	0	NA	NA	NA	NA	NA
1353	BEGAIN	7.07412	0.00633968	0.539433	2.21407	0.818801	0.866389
1354	BEND2	0.237741	-0.00029231	4.61294	0.16958	0.999407	NA
1355	BEND3	20.2149	-0.647237	0.553479	11.1812	0.0479032	0.109419
1356	BEND4	1.97771	-0.0103087	1.12289	1.32346	0.932499	0.952163
1357	BEND5	6.71625	-0.526388	0.591742	8.10209	0.150698	0.258589
1358	BEND6	14.603	0.695471	0.456583	6.03182	0.303135	0.425346
1359	BEND7	25.5017	-0.728733	0.432718	5.62076	0.344886	0.467131
1360	BEST2	0	NA	NA	NA	NA	NA
1361	BEST3	2.80434	2.42989	1.32079	10.2851	0.0675492	0.141839
1362	BEST4	0.217253	-0.173486	5.30442	1.04004	0.959272	NA
1363	BET1	292.563	-0.654352	0.275701	15.5931	0.00810706	0.0285747
1364	BET1L	392.893	-0.102872	0.227147	6.97436	0.222554	0.342831
1365	BEX3	18.2456	-0.144062	0.352892	1.96585	0.85385	0.892617
1366	BEX4	81.7343	0.124849	0.291703	3.40667	0.637554	0.723362
1367	BFAR	1408.37	0.157765	0.148363	22.7668	0.000374036	0.00252118
1368	BFSP1	0.246309	2.06771	5.26146	0.861998	0.972912	NA
1369	BFSP2	0.215901	-0.173436	4.70635	0.171233	0.999393	NA
1370	BGLAP	1.27597	-0.32163	1.31611	4.07126	0.539203	NA
1371	BGN	382.013	-0.344513	0.321141	7.00467	0.220293	0.340457
1372	BHLHA15	80.2949	-0.26963	0.806289	3.33361	0.6487	0.732236
1373	BHLHA9	0	NA	NA	NA	NA	NA
1374	BHLHE22	14.3253	0.588454	0.595573	4.91763	0.426015	0.543756
1375	BHLHE40	851.218	-0.612415	0.4468	10.0724	0.0732109	0.150716
1376	BHLHE41	81.6818	-0.357892	0.389265	12.164	0.0326084	0.0820235
1377	BHMT	79685.3	-0.480965	0.235508	21.0858	0.000780369	0.00457354
1378	BHMT2	2624.61	0.258124	0.228576	6.63834	0.248956	0.371071
1379	BICD1	29.4586	0.764459	0.369413	13.6182	0.0182253	0.0531646
1380	BICD2	236.165	0.0310969	0.226117	15.6746	0.00783706	0.0278182
1381	BICDL1	16.4725	-0.241372	0.451631	2.23595	0.815627	0.864343
1382	BICDL2	5.61759	-0.0847337	0.660961	8.01696	0.155303	0.264084
1383	BICRA	101.312	0.197427	0.251902	7.44595	0.18953	0.304749
1384	BICRAL	121.001	-0.287103	0.230794	5.63442	0.343431	0.465397
1385	BID	131.238	0.573354	0.235823	13.4223	0.0197271	0.0564395
1386	BIN1	229.835	0.249504	0.177576	23.2545	0.00030177	0.00213138
1387	BIN2	40.1921	-0.523309	0.30486	11.7239	0.0387736	0.0930474
1388	BIN3	109.562	0.0809052	0.230901	2.20557	0.82003	0.867404
1389	BIRC2	277.331	0.233884	0.238601	3.60112	0.608145	0.698973
1390	BIRC5	24.0307	-0.182922	0.36073	10.4398	0.0636898	0.136099
1391	BIRC6	1442.21	-0.0995595	0.179131	0.773824	0.978673	0.985848
1392	BIVM	390.758	-0.532687	0.256423	12.5726	0.0277308	0.0727125
1393	BLACAT1	8.20641	-0.082554	0.633454	1.74123	0.883666	0.914851
1394	BLCAP	525.989	-0.124042	0.120458	13.1708	0.0218294	0.0608152
1395	BLK	2.27123	-1.15264	1.38048	2.22787	0.8168	0.864955
1396	BLM	15.719	-1.03405	0.583315	4.69351	0.454417	0.569074
1397	BLMH	1114.12	-0.194541	0.0919688	9.71354	0.083771	0.166198
1398	BLNK	534.281	-0.181154	0.208599	14.4305	0.013094	0.0411613
1399	BLOC1S1	508.387	-0.144346	0.278547	2.06598	0.839942	0.882644
1400	BLOC1S2	149.286	0.152182	0.210581	5.93796	0.312303	0.43487
1401	BLOC1S3	103.58	-0.73131	0.265396	18.9459	0.00196724	0.00956603
1402	BLOC1S4	79.1562	0.0290963	0.302965	6.89726	0.228394	0.348984
1403	BLOC1S5	372.897	0.427501	0.41471	15.5305	0.00832049	0.0291925
1404	BLOC1S6	174.473	-0.1299	0.257944	13.5366	0.0188372	0.0544693
1405	BLTP1	668.557	-0.155711	0.196098	12.7598	0.0257371	0.0687038
1406	BLTP2	648.326	-0.266216	0.130214	23.6456	0.000253939	0.00187263
1407	BLTP3A	710.312	-0.175468	0.205809	6.0469	0.301682	0.423974
1408	BLTP3B	715.696	0.121471	0.237816	1.29864	0.935072	0.954487
1409	BLVRB	446.011	0.561113	0.264148	16.5406	0.0054587	0.0211383
1410	BLZF1	287.454	-0.12388	0.21759	12.0046	0.034725	0.0858963
1411	BMAL1	167.697	-0.00857994	0.22467	18.088	0.00283813	0.0127946
1412	BMERB1	39.6499	0.654674	0.353213	15.4651	0.00854919	0.0298451
1413	BMF	97.1937	-1.48138	0.303253	91.4989	3.25356e-18	7.26448e-16
1414	BMI1	124.094	-0.0243992	0.316397	10.0684	0.0733205	0.150864
1415	BMP1	1298.94	-0.354193	0.161027	64.1681	1.66728e-12	1.49738e-10
1416	BMP10	6.79011	0.490604	0.860522	11.914	0.0359849	0.0882388
1417	BMP15	12.0327	-1.05417	0.583004	5.28838	0.381708	0.50245
1418	BMP2	41.8675	-0.0207187	0.480209	19.7124	0.00141494	0.00734471
1419	BMP2K	106.72	-0.331943	0.205286	6.58402	0.25346	0.376109
1420	BMP3	2.33483	-0.751985	1.33241	1.59215	0.902197	0.928773
1421	BMP4	22.5726	-0.72399	0.516418	2.90729	0.714277	0.783375
1422	BMP5	10.5312	0.564746	0.733148	1.83477	0.871503	0.905993
1423	BMP6	109.501	1.8506	0.474211	33.21	3.41875e-06	5.60243e-05
1424	BMP7	5.36943	0.689484	0.96561	7.51207	0.185256	0.29961
1425	BMPER	4.96394	-0.942354	0.976033	6.74514	0.240295	0.361567
1426	BMPR1A	199.705	0.689408	0.270271	13.7869	0.017021	0.0504482
1427	BMPR1B	8.78701	0.528017	0.537005	5.57136	0.350185	0.471855
1428	BMPR2	236.759	-0.166391	0.216462	13.3244	0.0205212	0.0581422
1429	BMS1	516.143	-0.378917	0.185788	19.3211	0.00167454	0.00842036
1430	BMT2	166.862	0.0945429	0.284164	18.4869	0.00239423	0.0112807
1431	BMX	2.35434	-0.650629	1.44703	3.44484	0.63175	0.718671
1432	BNC1	1.91999	0.440456	1.3604	4.50605	0.479075	0.591203
1433	BNC2	0.72387	0.772679	2.21589	1.19385	0.945466	NA
1434	BNIP1	103.529	-0.00740527	0.282503	4.42852	0.489504	0.600432
1435	BNIP2	150.469	-0.206359	0.249928	18.8887	0.00201604	0.00976576
1436	BNIP3	2448.97	-0.0133529	0.171067	10.2992	0.067189	0.141368
1437	BNIP3L	1922.67	-0.511521	0.22303	25.5236	0.000110366	0.000966066
1438	BNIP5	1.76763	-0.216804	1.16709	3.82444	0.574959	0.671986
1439	BNIPL	4.93234	-0.249823	0.794994	4.63357	0.462213	0.5761
1440	BOC	13.6575	-0.312066	0.65692	1.7027	0.88856	0.917967
1441	BOD1	300.322	-0.191404	0.170995	7.84592	0.164934	0.275851
1442	BOD1L1	480.919	-0.441321	0.128643	30.2777	1.30035e-05	0.00016872
1443	BOK	7.44458	-0.495297	0.657482	7.1996	0.206214	0.324691
1444	BOLA1	239.471	-0.0138759	0.372042	4.46449	0.484649	0.596251
1445	BOLA2B	348.599	-0.376054	0.266734	7.02289	0.218944	0.339328
1446	BOLA3	111.741	0.739353	0.242582	27.2904	5.00739e-05	0.000504378
1447	BOLL	0	NA	NA	NA	NA	NA
1448	BOP1	600.243	-0.0910367	0.120774	10.4932	0.0624068	0.133928
1449	BORA	20.5518	0.198411	0.397487	1.40495	0.923771	0.945077
1450	BORCS5	323.232	0.362233	0.259664	8.01766	0.155265	0.264047
1451	BORCS6	118.06	0.0687157	0.172219	4.92768	0.424769	0.542684
1452	BORCS7	337.224	0.183442	0.207933	6.79702	0.23618	0.357403
1453	BORCS8	521.773	0.160514	0.181263	8.67902	0.122573	0.221676
1454	BPGM	191.611	0.062462	0.177432	18.5713	0.00230939	0.0109515
1455	BPHL	3815.95	0.277948	0.19573	7.97777	0.157465	0.266942
1456	BPIFA1	0	NA	NA	NA	NA	NA
1457	BPIFA3	0	NA	NA	NA	NA	NA
1458	BPIFB2	0.193783	2.33944	5.26337	0.860079	0.973044	NA
1459	BPIFB3	0.108637	-0.173468	5.30442	0.109017	0.999799	NA
1460	BPIFB4	0.0362122	-0.17345	5.30442	-1.14068	1	NA
1461	BPIFB6	165.483	10.2019	1.57473	82.1483	2.97991e-16	5.57035e-14
1462	BPIFC	0	NA	NA	NA	NA	NA
1463	BPNT1	1887.48	-0.4826	0.199209	61.4831	5.99903e-12	4.68158e-10
1464	BPNT2	249.021	-0.293736	0.164275	5.30596	0.379692	0.500938
1465	BPTF	686.018	0.136233	0.197601	16.2802	0.00608809	0.0229801
1466	BRAF	214.791	-0.0232262	0.15195	13.0983	0.0224751	0.0621449
1467	BRAP	960.668	-0.304424	0.197848	49.6361	1.64494e-09	7.3866e-08
1468	BRAT1	225.59	-0.087202	0.186973	10.4087	0.0644493	0.137157
1469	BRCA1	20.1144	0.0689357	0.343844	2.71397	0.743981	0.806925
1470	BRCA2	9.81818	-0.369901	0.568293	3.38342	0.641096	0.726406
1471	BRCC3	506.429	0.00522251	0.146485	7.48294	0.187129	0.301643
1472	BRD1	188.475	-0.162252	0.190709	14.3707	0.0134184	0.0419922
1473	BRD2	1312.66	-0.0285098	0.237632	38.057	3.67504e-07	8.43999e-06
1474	BRD3	401.041	-0.289175	0.202337	5.19386	0.392682	0.512774
1475	BRD3OS	12.1732	0.0363622	0.567958	5.51175	0.356659	0.478442
1476	BRD4	1144.25	-0.306163	0.118016	8.68432	0.122338	0.221353
1477	BRD7	505.99	0.0150641	0.114211	4.33111	0.502793	0.612253
1478	BRD8	393.968	-0.366602	0.18146	9.74495	0.0827931	0.164725
1479	BRD9	635.674	0.012927	0.157069	9.75261	0.0825563	0.164397
1480	BRDT	0	NA	NA	NA	NA	NA
1481	BRF1	367.019	-0.0859874	0.12127	14.0636	0.0152104	0.0462761
1482	BRF2	56.072	-0.00648327	0.225231	5.33542	0.376331	0.497939
1483	BRI3	105.847	0.314724	0.372295	7.80758	0.167164	0.278595
1484	BRI3BP	443.747	0.0626655	0.162302	5.37289	0.372085	0.493739
1485	BRICD5	0.178336	-1.11337	5.3036	0.405029	0.99519	NA
1486	BRINP1	35.0691	0.624675	0.312104	23.9601	0.000220983	0.00167829
1487	BRINP2	8.71794	-0.294964	0.515706	8.01812	0.15524	0.264032
1488	BRINP3	6.69269	0.703669	0.629177	9.93891	0.0769848	0.15632
1489	BRIP1	4.54031	-1.25424	1.0037	2.55007	0.768937	0.827239
1490	BRIX1	174.312	-0.291149	0.187847	30.8742	9.91832e-06	0.000136864
1491	BRK1	936.316	-0.118605	0.175228	6.2133	0.286014	0.408853
1492	BRME1	1.26049	1.9686	1.67251	5.22493	0.389051	NA
1493	BRMS1	732.753	-0.0700933	0.15549	7.91705	0.160867	0.27108
1494	BRMS1L	248.82	-0.111274	0.208038	29.2934	2.03084e-05	0.000243459
1495	BROX	394.713	-0.419581	0.19962	23.4175	0.00028084	0.00201463
1496	BRPF1	273.989	-0.205638	0.200398	10.9012	0.0533753	0.118862
1497	BRPF3	231.007	0.0248546	0.282497	3.8289	0.574304	0.671602
1498	BRS3	0	NA	NA	NA	NA	NA
1499	BRSK1	51.7237	0.544051	0.354506	15.5378	0.00829544	0.0291237
1500	BRSK2	23.3859	0.701491	0.464465	11.7882	0.0378078	0.0912887
1501	BRWD1	335.851	0.197428	0.215305	8.43492	0.133839	0.236674
1502	BRWD3	204.229	-0.12451	0.23359	6.34175	0.274371	0.396975
1503	BSCL2	416.191	0.168526	0.207877	6.59767	0.252322	0.374926
1504	BSDC1	1486.06	-0.160309	0.130739	46.8126	6.20373e-09	2.42066e-07
1505	BSG	4889.2	0.291975	0.135898	27.6733	4.21615e-05	0.000437712
1506	BSN	44.1786	0.878819	0.263662	21.2076	0.000740049	0.00439005
1507	BSND	0.395835	-0.404325	5.30442	1.3421	0.93054	NA
1508	BSPH1	11.2535	1.61864	0.88325	7.21828	0.204906	0.323075
1509	BSPRY	84.034	-0.486707	0.381283	7.91874	0.160771	0.27106
1510	BST1	242.417	-0.174118	1.03181	10.4363	0.0637753	0.136246
1511	BST2	67.01	-0.520471	0.33237	7.37266	0.194368	0.310534
1512	BSX	0	NA	NA	NA	NA	NA
1513	BTAF1	300.069	-0.237363	0.31365	20.3989	0.00105162	0.00578177
1514	BTBD1	567.041	0.16654	0.114355	7.30666	0.198814	0.315855
1515	BTBD10	61.2942	-0.118667	0.255924	0.614309	0.987339	0.991347
1516	BTBD16	8.57995	-0.781261	1.4029	7.58421	0.180688	0.294122
1517	BTBD17	1.66544	0.275196	1.21196	5.0585	0.408782	0.527076
1518	BTBD18	11.0243	-0.0837806	0.48562	2.4567	0.783001	0.838592
1519	BTBD19	10.5522	-0.899596	0.544948	4.22681	0.517245	0.624782
1520	BTBD2	475.512	-0.125745	0.156534	14.6852	0.0117955	0.0379629
1521	BTBD3	171.331	0.0382181	0.224702	13.8157	0.0168235	0.0499731
1522	BTBD6	181.663	-0.355924	0.210541	5.37454	0.371899	0.493554
1523	BTBD7	338.497	0.0946057	0.272237	10.4128	0.0643486	0.137093
1524	BTBD8	33.7052	-0.185935	0.506436	3.28168	0.656648	0.7382
1525	BTBD9	201.419	-0.05125	0.136197	1.12523	0.951846	0.96676
1526	BTC	0.484286	0.542054	2.74617	1.81536	0.874058	NA
1527	BTD	315.192	-0.248208	0.264836	1.63577	0.89689	0.924414
1528	BTF3	798.536	-0.274659	0.120798	12.0738	0.0337906	0.0841808
1529	BTF3L4	194.965	0.0762987	0.159357	4.73039	0.449661	0.564538
1530	BTG1	218.91	-0.0432375	0.23463	37.5682	4.60698e-07	1.01733e-05
1531	BTG2	752.165	-0.449784	0.419955	14.0108	0.015541	0.047015
1532	BTG3	212.454	-0.159835	0.315362	13.4086	0.0198367	0.0566637
1533	BTG4	0.0775133	0.980684	5.30442	-0.334751	1	NA
1534	BTK	28.1387	-0.292657	0.360113	9.50111	0.0906702	0.176509
1535	BTN1A1	14.6271	0.84913	0.612655	34.5242	1.87216e-06	3.35527e-05
1536	BTNL9	3.39442	0.841884	0.901361	5.75003	0.331307	0.453747
1537	BTRC	153.021	-0.134711	0.15123	11.8441	0.0369879	0.0899258
1538	BUB1	12.155	-0.893739	0.451947	11.4983	0.0423486	0.099648
1539	BUB1B	12.9578	-0.991482	0.506154	10.4967	0.0623234	0.133802
1540	BUB3	425.571	-0.284234	0.186473	5.28427	0.382181	0.50285
1541	BUD13	121.324	0.193938	0.171099	5.20359	0.391542	0.512034
1542	BUD23	545.239	0.0567179	0.207786	19.6902	0.00142851	0.00739842
1543	BUD31	902.417	-0.0228411	0.109734	15.7863	0.00748146	0.0269553
1544	BVES	18.4649	0.0610256	0.468017	0.74669	0.980308	0.986815
1545	BYSL	195.984	0.0310048	0.194705	2.11263	0.833352	0.877654
1546	BZW1	3492.54	-0.118642	0.167552	12.3115	0.0307601	0.0785743
1547	BZW2	429.449	-0.264659	0.150719	9.30456	0.0975157	0.186471
1548	C10H12orf40	0.271988	1.44707	3.85235	0.80976	0.976407	NA
1549	C10H12orf50	1.13885	0.273441	2.51774	6.19027	0.288143	NA
1550	C10H12orf56	6.39035	-0.454719	0.952523	5.7112	0.335342	0.45787
1551	C10H12orf60	0.141002	0.17279	5.30442	0.198117	0.999134	NA
1552	C10H12orf71	0.240685	-0.18861	5.29602	0.734501	0.981022	NA
1553	C10H12orf75	4.56085	-0.522294	0.716562	1.82959	0.872186	0.906351
1554	C11H10orf143	101.137	0.335883	0.304101	4.3761	0.496629	0.606904
1555	C11H10orf53	0	NA	NA	NA	NA	NA
1556	C11H10orf71	7.9427	2.05199	0.698715	12.6009	0.0274195	0.0721671
1557	C11H10orf82	0.0362122	-0.17345	5.30442	-1.14068	1	NA
1558	C11H10orf90	633.683	4.55622	0.840598	35.346	1.28338e-06	2.39624e-05
1559	C11H10orf95	0.418978	0.344142	3.18387	1.07056	0.956677	NA
1560	C11H22orf15	0.507564	-0.901741	2.79484	2.33814	0.800649	NA
1561	C11H22orf39	54.0173	-1.37153	0.430137	17.0495	0.00440694	0.0179175
1562	C1D	73.1948	-0.470879	0.286527	6.09215	0.297356	0.419839
1563	C1GALT1	329.657	0.225469	0.32094	4.12184	0.532011	0.636355
1564	C1GALT1C1	261.407	0.325784	0.240101	10.0316	0.0743447	0.152323
1565	C1H13orf42	0	NA	NA	NA	NA	NA
1566	C1H13orf46	0.111505	-0.173469	5.30442	0.136753	0.99965	NA
1567	C1H4orf47	53.0826	-0.764246	0.323674	12.8962	0.0243709	0.0660018
1568	C1H5orf22	268.87	0.0292409	0.182368	16.1556	0.00641349	0.0239552
1569	C1H5orf34	40.1169	-0.246642	0.338393	0.90703	0.969711	0.979928
1570	C1H7orf31	0	NA	NA	NA	NA	NA
1571	C1H8orf48	75.6915	-0.652051	0.457152	13.6561	0.0179483	0.0525568
1572	C1H8orf74	0.734484	0.423184	2.40979	5.29058	0.381456	NA
1573	C1H9orf131	8.06065	0.100318	0.746135	4.50713	0.47893	0.591113
1574	C1H9orf152	21.2156	1.16398	0.839054	16.6254	0.00526792	0.0205651
1575	C1H9orf24	0.48674	-0.481116	3.43482	2.20547	0.820045	NA
1576	C1H9orf40	36.7316	-0.375942	0.318738	4.6401	0.461361	0.57526
1577	C1H9orf78	628.089	-0.0136324	0.143271	6.39978	0.269239	0.391953
1578	C1H9orf85	160.305	-0.129653	0.204966	17.1275	0.00426416	0.0174613
1579	C1QA	595.132	-0.406101	0.32605	29.9295	1.52271e-05	0.000191243
1580	C1QB	561.228	-0.263197	0.333264	33.2521	3.35363e-06	5.52387e-05
1581	C1QBP	759.944	0.120642	0.154207	5.39351	0.369764	0.491308
1582	C1QC	694.453	-0.265882	0.322523	27.3032	4.97864e-05	0.000502427
1583	C1QL1	2.64352	1.17456	1.08471	5.45787	0.362587	0.484437
1584	C1QL2	7.93422	0.519386	0.68669	6.60526	0.251691	0.374179
1585	C1QL3	68.4529	0.534376	0.357697	7.7143	0.1727	0.284751
1586	C1QL4	0.576165	0.896834	2.7066	2.75968	0.736977	NA
1587	C1QTNF1	94.314	-0.00445548	0.313607	9.94108	0.076922	0.156255
1588	C1QTNF12	4.78457	0.58528	0.803395	4.17822	0.524052	0.630136
1589	C1QTNF2	11.8885	-0.591137	0.641005	9.56525	0.0885335	0.173273
1590	C1QTNF3	2.34764	-2.48073	1.23127	11.569	0.0411954	0.0974625
1591	C1QTNF4	4.51531	1.07668	0.761502	4.23564	0.516012	0.623791
1592	C1QTNF5	11.8228	0.388978	0.535185	20.6484	0.000943776	0.00532628
1593	C1QTNF6	161.265	-1.04393	0.672076	45.7141	1.03842e-08	3.87325e-07
1594	C1QTNF7	7.2656	-2.39869	0.77273	11.3436	0.0449767	0.104294
1595	C1R	21030.4	-0.234804	0.135408	19.0225	0.00190369	0.00931903
1596	C1RL	241.214	0.441793	0.3214	19.0991	0.00184211	0.00907009
1597	C1S	35088.9	-0.0857483	0.123174	11.6992	0.0391502	0.0938111
1598	C2	10068.3	0.155784	0.169895	4.0859	0.537116	0.640554
1599	C2CD2	1104.31	0.17195	0.16408	5.58182	0.349057	0.470996
1600	C2CD2L	235.389	0.119697	0.19	7.14609	0.21	0.328945
1601	C2CD3	195.477	-0.401658	0.18032	17.9705	0.0029836	0.0132571
1602	C2CD4C	1.73694	-0.0445226	1.20121	0.302345	0.997599	0.998763
1603	C2CD4D	1.28882	-0.257196	2.24538	11.3018	0.0457136	NA
1604	C2CD5	203.391	-0.174861	0.19727	1.37344	0.927196	0.947832
1605	C2CD6	1.53588	-0.275231	1.46438	0.321933	0.99721	0.998639
1606	C2H15orf61	41.5586	0.180332	0.410849	12.4062	0.0296269	0.0762418
1607	C2H18orf21	111.41	0.0845025	0.196158	5.19859	0.392128	0.512467
1608	C2H18orf32	626.627	0.189485	0.194006	21.8004	0.000571382	0.00356016
1609	C2H18orf54	3.54911	-1.47015	1.10295	2.03996	0.843588	0.885333
1610	C2H18orf63	6.64528	-0.482866	0.898015	1.11214	0.953024	0.967589
1611	C2H19orf25	372.656	-0.086538	0.165078	4.20297	0.520579	0.627396
1612	C2H19orf38	5.63443	0.971848	0.805925	3.73723	0.587833	0.68187
1613	C2H19orf44	28.9694	0.117932	0.397437	1.15305	0.949301	0.96509
1614	C2H19orf53	296.197	0.00658254	0.187179	2.83488	0.725424	0.792227
1615	C2H19orf67	29.4035	-0.318084	0.327496	14.4993	0.0127306	0.0402788
1616	C2H1orf116	61.6803	0.414117	0.372214	14.5796	0.0123183	0.0392837
1617	C2H1orf35	156.161	0.0184546	0.205712	2.79298	0.731865	0.797388
1618	C2H1orf74	75.4876	-0.583784	0.360587	12.3857	0.0298682	0.076752
1619	C2H21orf140	0	NA	NA	NA	NA	NA
1620	C2H21orf58	0	NA	NA	NA	NA	NA
1621	C2H21orf62	61.2684	-0.109569	0.292907	5.67882	0.338736	0.461055
1622	C2H21orf91	173.019	-0.859423	0.29519	16.2458	0.00617624	0.0232418
1623	C2H3orf33	56.4468	1.16399	0.416974	33.2325	3.38387e-06	5.56228e-05
1624	C2H3orf38	302.865	-0.252624	0.315144	23.3567	0.000288478	0.00205475
1625	C2H3orf52	0.336305	0.17497	3.25879	0.784262	0.978026	NA
1626	C2H3orf70	46.5762	0.200515	0.429007	3.38356	0.641075	0.726406
1627	C2H3orf80	0.25347	2.15128	5.26855	0.812247	0.976246	NA
1628	C2H3orf85	0	NA	NA	NA	NA	NA
1629	C2H5orf47	24.4012	0.640172	0.498072	3.99974	0.549454	0.651018
1630	C2H5orf58	0	NA	NA	NA	NA	NA
1631	C2H6orf136	364.2	-0.00119913	0.192709	1.64974	0.895169	0.923192
1632	C2H6orf15	11.4656	-1.02299	0.836039	4.61353	0.464839	0.578566
1633	C2H6orf47	339.317	-0.0137752	0.177062	1.73218	0.884821	0.915457
1634	C2H6orf62	2118.39	0.0275541	0.13981	34.0984	2.27602e-06	3.93856e-05
1635	C2H7orf25	199.904	-0.048868	0.181024	12.6684	0.0266924	0.0706539
1636	C2H7orf57	83.7988	0.192847	0.291571	1.89001	0.864145	0.900313
1637	C2H8orf33	448.495	-0.213498	0.18776	4.98407	0.417828	0.535902
1638	C2H8orf34	0.944389	-0.121227	1.56834	0.886795	0.97117	NA
1639	C2H8orf76	50.7617	-0.247309	0.248041	3.03368	0.694793	0.76835
1640	C2H8orf82	758.947	0.00291899	0.204741	18.6447	0.00223803	0.0106666
1641	C2H8orf88	0.0401923	-0.17345	5.30442	-1.06816	1	NA
1642	C2H8orf89	0.0674624	0.980684	5.30442	-0.46096	1	NA
1643	C2H8orf90	0	NA	NA	NA	NA	NA
1644	C3AR1	13.816	-1.15432	0.58212	7.87528	0.163245	0.274081
1645	C3H10orf105	0.202279	-0.0324019	5.26946	0.586335	0.98862	NA
1646	C3H11orf52	115.623	-0.394259	0.258607	22.6516	0.000393456	0.00263331
1647	C3H11orf54	2090.37	0.816743	0.171457	25.8491	9.5455e-05	0.000858241
1648	C3H11orf65	0.545727	2.64805	2.65811	2.40273	0.791068	NA
1649	C3H11orf87	18.1328	1.13985	0.471924	10.6645	0.058452	0.127517
1650	C3H11orf97	1.58902	-0.679144	1.3961	0.752425	0.979968	0.986725
1651	C3H14orf119	253.859	-0.198282	0.149622	2.02203	0.846089	0.887162
1652	C3H14orf132	0.862168	-0.804506	1.819	3.89278	0.564954	NA
1653	C3H14orf28	2.1035	-0.356672	1.17663	0.529431	0.991006	0.994222
1654	C3H14orf39	0	NA	NA	NA	NA	NA
1655	C3H14orf93	101.87	-0.460087	0.250879	9.16322	0.102728	0.19397
1656	C3H15orf39	247.225	-0.0963395	0.231088	3.40878	0.637233	0.723112
1657	C3H15orf48	0.74621	0.690493	2.26628	2.27967	0.809248	NA
1658	C3H15orf62	61.1238	-0.215307	0.241899	54.0124	2.0836e-10	1.16306e-08
1659	C3H17orf100	12.9095	1.75222	0.540801	18.2161	0.00268738	0.0122769
1660	C3H17orf107	4.42503	0.933859	0.746384	13.6324	0.0181211	0.0529472
1661	C3H17orf114	0.0934177	-0.717547	5.3026	0.0703788	0.999932	NA
1662	C3H17orf49	228.444	-0.108011	0.171664	9.99862	0.0752744	0.153648
1663	C3H17orf50	0	NA	NA	NA	NA	NA
1664	C3H17orf58	3.2715	0.324171	0.933104	2.76584	0.736031	0.800733
1665	C3H17orf67	0.169158	-1.61022	5.29876	0.439674	0.994166	NA
1666	C3H17orf75	352.258	-0.207185	0.170217	17.7381	0.00329321	0.01427
1667	C3H17orf78	0.444155	1.34449	4.60867	1.61512	0.899415	NA
1668	C3H17orf80	167.603	0.0948448	0.260268	23.509	0.000269721	0.00195053
1669	C3H17orf98	0.222857	1.03836	5.30442	0.370685	0.996099	NA
1670	C3H17orf99	6.87668	0.0906442	1.0187	3.37877	0.641806	0.726955
1671	C3H1orf54	5.11272	0.18013	0.846892	7.45907	0.188675	0.303587
1672	C3H1orf56	19.3264	-0.217766	0.44379	22.9328	0.000347695	0.00237752
1673	C3H20orf141	0	NA	NA	NA	NA	NA
1674	C4BPB	1989.43	0.0383469	0.270646	37.5647	4.61439e-07	1.01757e-05
1675	C4H16orf54	24.5524	0.0999638	0.474912	4.13149	0.530644	0.635636
1676	C4H16orf89	0.32501	0.0573903	4.30453	1.17197	0.947538	NA
1677	C4H16orf90	282.358	0.315451	0.207698	14.1264	0.0148261	0.0453298
1678	C4H16orf92	4.47968	-0.235032	0.995005	8.99955	0.109082	0.202912
1679	C4H16orf96	0.267102	1.03839	3.88624	0.341518	0.996789	NA
1680	C4H3orf18	215.058	1.15059	0.433751	18.8945	0.00201106	0.00974963
1681	C4H3orf20	0.0371683	-0.17345	5.30442	-1.12283	1	NA
1682	C4H3orf22	1.19705	2.65578	2.18019	2.2129	0.81897	NA
1683	C4H3orf49	5.67415	-1.27283	0.789673	6.15215	0.291694	0.414137
1684	C4H3orf62	211.515	-0.689589	0.392499	5.48061	0.360077	0.481781
1685	C4H3orf84	0	NA	NA	NA	NA	NA
1686	C4H6orf118	0.106592	0.634466	5.30442	-0.133477	1	NA
1687	C4H6orf120	1300.03	-0.099141	0.207731	3.25821	0.660246	0.740744
1688	C4H6orf132	305.284	0.347367	0.281143	10.6652	0.058437	0.127502
1689	C4H6orf141	0.708436	0.445896	2.45315	0.737523	0.980846	NA
1690	C4H6orf163	0.221391	-0.269589	4.67064	0.657882	0.9852	NA
1691	C4H6orf226	22.3971	-0.151726	0.668633	6.19354	0.28784	0.410412
1692	C4H7orf50	508.474	0.534138	0.181015	12.8201	0.0251238	0.0675077
1693	C5	15477.7	1.19412	0.214573	52.4477	4.36648e-10	2.24986e-08
1694	C5AR1	23.4126	-0.33886	0.445105	9.90523	0.0779654	0.157776
1695	C5H1orf122	207.239	-0.51139	0.333387	7.66774	0.175523	0.288135
1696	C5H1orf141	0.166205	0.142314	5.30287	0.33425	0.996949	NA
1697	C5H1orf162	20.2162	-0.715421	0.432436	38.611	2.8438e-07	6.79301e-06
1698	C5H1orf174	87.9565	0.149043	0.376158	10.4069	0.0644942	0.137229
1699	C5H1orf185	0.081979	0.980684	5.30442	-0.283225	1	NA
1700	C5H1orf210	207.052	-0.491615	0.263967	24.0564	0.000211759	0.00162106
1701	C5H1orf216	92.6379	0.625112	0.231723	30.3415	1.26329e-05	0.000164811
1702	C5H1orf232	0	NA	NA	NA	NA	NA
1703	C5H1orf43	577.006	0.100371	0.105165	5.60334	0.346747	0.468784
1704	C5H1orf50	468.996	0.141576	0.242716	9.50063	0.0906861	0.176519
1705	C5H1orf52	88.9123	-0.462114	0.268123	28.0344	3.58387e-05	0.000383584
1706	C5H1orf87	0.116432	0.980674	5.30442	-0.08757	1	NA
1707	C5H1orf94	0.0401923	-0.17345	5.30442	-1.06816	1	NA
1708	C5H20orf202	0	NA	NA	NA	NA	NA
1709	C5H20orf204	2.10714	3.90632	1.4095	14.2595	0.0140425	0.0435133
1710	C5H20orf85	0	NA	NA	NA	NA	NA
1711	C5H20orf96	4.21894	0.817657	0.88455	3.19751	0.669565	0.748
1712	C5H4orf19	684.965	-0.00601047	0.191568	7.88058	0.162941	0.273742
1713	C5H4orf48	1.13662	1.53032	1.65405	4.03904	0.543809	NA
1714	C5H6orf89	778.742	-0.272733	0.119706	15.7485	0.00760004	0.0272221
1715	C6	4614.62	-0.182776	0.229557	10.3291	0.0664289	0.140312
1716	C6H11orf16	0.0789811	-1.86091	5.28884	-0.144445	1	NA
1717	C6H11orf24	193.802	0.0639631	0.270623	14.4346	0.0130721	0.0411065
1718	C6H11orf42	1.1937	0.943107	1.38021	4.51174	0.478314	NA
1719	C6H11orf58	573.318	-0.0782552	0.130634	7.91419	0.161029	0.271295
1720	C6H11orf68	143.183	0.0181466	0.228253	9.56987	0.0883816	0.173039
1721	C6H11orf80	4.64875	0.451944	0.856312	23.1978	0.000309402	0.0021678
1722	C6H11orf86	704.901	-0.122183	0.339391	4.95314	0.421626	0.539439
1723	C6H11orf91	0.16865	-0.40423	5.30442	0.145867	0.99959	NA
1724	C6H11orf96	104.068	-0.258511	0.450026	9.13596	0.103763	0.195349
1725	C6H11orf98	186.091	-0.0344144	0.165612	3.31508	0.651534	0.734249
1726	C6H12orf4	125.728	0.0640384	0.23082	9.42569	0.0932427	0.180074
1727	C6H12orf57	541.909	-0.00904357	0.258806	3.06214	0.690406	0.765257
1728	C6H15orf40	69.0899	0.524403	0.247533	14.7187	0.0116344	0.0375499
1729	C6H22orf23	65.8308	-0.45074	0.244313	10.8126	0.0552243	0.122066
1730	C6H4orf17	0.20313	0.216642	5.30099	0.467245	0.993274	NA
1731	C6H4orf3	260.129	-0.26869	0.176161	12.8096	0.0252299	0.0677009
1732	C6H4orf54	2.19891	1.31717	1.36908	3.54891	0.616001	0.705903
1733	C6H5orf15	1029.14	-0.107517	0.1889	22.1444	0.000491509	0.00316313
1734	C6H5orf24	209.901	-0.55158	0.257373	34.9854	1.51475e-06	2.76404e-05
1735	C6H5orf46	0	NA	NA	NA	NA	NA
1736	C6H5orf63	156.779	-0.0850466	0.301698	5.5355	0.354069	0.475762
1737	C7	289.943	-0.532188	0.459677	11.3125	0.0455238	0.105362
1738	C7H1orf115	4519.56	0.103193	0.197546	4.87338	0.431528	0.548575
1739	C7H1orf53	48.0235	-0.0271091	0.423953	4.51514	0.47786	0.590112
1740	C7H4orf33	145.833	1.44561	0.329157	24.2467	0.000194645	0.00151751
1741	C7H4orf46	59.1582	0.0739509	0.384222	4.0571	0.541225	0.644164
1742	C7H8orf58	5.19713	-0.01584	0.723842	8.13206	0.149106	0.256532
1743	C8A	5986.28	0.0923044	0.167099	8.9119	0.11263	0.207809
1744	C8B	5599.17	-0.0179707	0.218334	6.37756	0.271194	0.39376
1745	C8G	2479.71	0.278129	0.118746	14.8987	0.0108039	0.0355108
1746	C8H16orf46	14.8847	0.0218407	0.491591	3.80767	0.577425	0.673977
1747	C8H16orf74	0.818475	-2.09616	2.32918	2.43181	0.786727	NA
1748	C8H16orf78	0	NA	NA	NA	NA	NA
1749	C8H16orf86	2.34857	1.35168	1.10914	7.35384	0.195626	0.312055
1750	C8H16orf87	58.4205	-0.0361965	0.237219	13.389	0.0199941	0.0570509
1751	C8H16orf95	20.4091	0.697846	0.508686	11.767	0.038124	0.0918456
1752	C8H19orf12	267.574	0.143049	0.231704	6.36094	0.272664	0.395253
1753	C8H19orf33	9.2536	-0.341871	0.566916	2.80897	0.729408	0.795269
1754	C8H19orf47	86.6672	-0.0711567	0.251699	7.1069	0.21281	0.332182
1755	C8H19orf81	6.51798	0.503612	0.664473	1.49526	0.913616	0.937706
1756	C8H19orf84	0	NA	NA	NA	NA	NA
1757	C8H19orf85	2.73341	0.117437	1.16091	4.25896	0.512765	0.620911
1758	C9	17702.8	0.105747	0.20829	5.31645	0.378492	0.499889
1759	C9H10orf67	0	NA	NA	NA	NA	NA
1760	C9H12orf43	64.1049	-0.80652	0.306826	9.65748	0.085543	0.168894
1761	C9H12orf76	30.5485	0.420011	0.335202	6.88194	0.229569	0.350414
1762	C9H1orf100	0.245198	-1.50068	4.56593	0.657552	0.985217	NA
1763	C9H1orf131	102.769	-0.220725	0.190202	12.4186	0.0294808	0.0760483
1764	C9H1orf198	186.484	-0.4415	0.181672	10.2502	0.0684493	0.14315
1765	C9H22orf31	0.662299	-0.973577	2.52779	2.05976	0.840816	NA
1766	C9H5orf52	2.87702	-1.33485	1.35199	4.11045	0.533626	0.637528
1767	C9orf72	265.955	-0.734271	0.21567	36.3635	8.03322e-07	1.59829e-05
1768	CA10	6.11296	0.549015	0.624522	3.58381	0.610746	0.70106
1769	CA11	25.4959	0.475802	0.348249	8.21301	0.144881	0.250845
1770	CA12	143.722	0.198655	0.525436	15.4694	0.00853403	0.0298051
1771	CA14	1777.97	1.11765	0.27915	28.9606	2.36037e-05	0.000273095
1772	CA2	832.819	0.881483	0.246219	66.0244	6.86981e-13	6.73409e-11
1773	CA3	13703.8	-0.425056	0.842817	6.40988	0.268353	0.391296
1774	CA4	16.0748	1.61469	0.556871	18.1804	0.00272863	0.0124128
1775	CA5A	5994.92	0.0560012	0.181371	17.7974	0.00321137	0.0140136
1776	CA5B	22.3656	0.859079	0.433013	7.45769	0.188765	0.303701
1777	CA6	5.9419	-0.130421	0.746168	3.17139	0.673582	0.751562
1778	CA7	1.74313	0.133452	1.026	1.99219	0.850224	0.890031
1779	CA8	859.038	0.374838	0.323967	19.749	0.00139274	0.00724821
1780	CA9	1.45231	2.23879	1.42199	5.09426	0.404485	0.523455
1781	CAAP1	272.975	-0.452047	0.232034	12.0959	0.0334976	0.083592
1782	CAB39	836.838	0.033081	0.124981	10.5688	0.0606314	0.131133
1783	CAB39L	284.896	-0.313764	0.196052	16.6048	0.00531356	0.020698
1784	CABCOCO1	41.4335	-0.0574154	0.380394	10.5208	0.0617532	0.132951
1785	CABIN1	232.562	0.164056	0.198584	8.31862	0.139528	0.244022
1786	CABLES1	59.8764	0.0266063	0.242713	5.80212	0.325952	0.448285
1787	CABLES2	200.168	-0.0691111	0.242869	12.2187	0.0319103	0.0808507
1788	CABP1	16.9441	0.395929	0.394938	9.09422	0.105364	0.197578
1789	CABP2	0.0391293	-0.519658	5.30442	-1.04527	1	NA
1790	CABP4	0.412724	-0.15049	3.60267	0.77619	0.978527	NA
1791	CABP7	99.7986	-0.132918	0.233493	8.8128	0.116768	0.213678
1792	CABS1	0	NA	NA	NA	NA	NA
1793	CABYR	5.74503	0.386274	0.762041	1.58418	0.903156	0.929462
1794	CACFD1	17.7149	-0.664	0.546895	8.6594	0.123445	0.222728
1795	CACHD1	30.0448	0.347183	0.550984	7.93179	0.160035	0.270187
1796	CACNA1A	25.1378	0.708763	0.392363	14.1186	0.0148735	0.0454403
1797	CACNA1B	21.2881	1.2107	0.370261	20.1634	0.00116451	0.00629689
1798	CACNA1C	42.6202	1.00028	0.369463	22.7392	0.000378592	0.00254655
1799	CACNA1D	43.966	-0.535209	0.356904	3.10073	0.684459	0.760227
1800	CACNA1E	49.1783	0.734288	0.374337	15.7867	0.00748034	0.0269553
1801	CACNA1F	0.0362122	-0.17345	5.30442	-1.14068	1	NA
1802	CACNA1G	61.0446	-0.312384	0.516685	9.11795	0.104451	0.196323
1803	CACNA1H	83.4886	0.71278	0.25361	36.9587	6.10464e-07	1.26794e-05
1804	CACNA1I	53.9325	0.192734	0.30428	13.3044	0.0206869	0.0584451
1805	CACNA1S	39.9111	1.60219	0.730422	4.34722	0.500581	0.610433
1806	CACNA2D1	36.0009	0.73454	0.3013	22.6061	0.000401399	0.00267422
1807	CACNA2D2	12.9809	1.17482	0.509428	21.4418	0.000668252	0.00404169
1808	CACNA2D3	12.124	1.17506	0.527884	10.04	0.0741111	0.152004
1809	CACNA2D4	0.310998	1.34627	3.73593	1.0187	0.961044	NA
1810	CACNB1	22.3008	0.917632	0.34782	20.2588	0.00111739	0.00609332
1811	CACNB2	88.6578	0.223576	0.288163	8.44672	0.133274	0.235933
1812	CACNB3	53.2573	0.130454	0.259274	11.8221	0.0373087	0.0904227
1813	CACNB4	10.7531	0.28641	0.570432	19.7358	0.00140071	0.00728496
1814	CACNG1	0.20531	1.70368	5.30109	0.422373	0.994691	NA
1815	CACNG2	16.9976	0.498949	0.448318	7.34207	0.196418	0.312918
1816	CACNG3	16.2119	0.709499	0.443579	4.11193	0.533415	0.637371
1817	CACNG4	2.2265	-0.650465	1.0294	2.26245	0.811766	0.861213
1818	CACNG5	4.33351	-0.46111	0.720001	2.08483	0.837287	0.880646
1819	CACTIN	498.368	-0.0233177	0.152906	1.09909	0.954184	0.968523
1820	CACUL1	620.265	-0.00917078	0.105177	8.39627	0.135707	0.239134
1821	CACYBP	1885.81	0.00444643	0.117965	11.39	0.0441727	0.102901
1822	CAD	85.0503	-0.377412	0.302903	8.60268	0.126001	0.226287
1823	CADM1	37.8894	-0.268869	0.348664	19.403	0.00161663	0.00819325
1824	CADM2	18.4641	0.491517	0.391564	4.72471	0.450391	0.565266
1825	CADM3	111.16	0.51644	0.26247	21.9284	0.000540275	0.00341007
1826	CADM4	190.527	-0.250827	0.3007	18.6186	0.00226315	0.0107672
1827	CADPS	37.8477	0.489581	0.331995	19.1701	0.00178682	0.00887119
1828	CADPS2	48.103	0.542215	0.461364	5.24919	0.386232	0.507194
1829	CAGE1	3.45682	0.857122	1.3979	2.69307	0.747177	0.809627
1830	CALB1	20.7879	0.751905	0.40724	10.2436	0.0686207	0.143433
1831	CALB2	27.1503	0.588337	0.539787	10.9768	0.0518421	0.116382
1832	CALCB	0.931144	4.03215	2.21577	7.54225	0.183333	NA
1833	CALCOCO1	506.544	-0.418878	0.226682	8.3277	0.139076	0.243497
1834	CALCOCO2	949.101	0.047764	0.15285	32.5162	4.69442e-06	7.35551e-05
1835	CALCR	1.28911	0.577948	1.3614	3.66895	0.597991	NA
1836	CALCRL	33.9506	0.00279613	0.464233	9.53559	0.0895158	0.174706
1837	CALD1	2049.19	-0.407738	0.174694	16.1968	0.00630402	0.0236397
1838	CALHM4	0.164546	0.980664	5.30442	0.195302	0.999164	NA
1839	CALHM5	7.07728	-1.22535	0.746015	8.59797	0.126215	0.226556
1840	CALHM6	1.26112	-2.81879	1.84898	7.93952	0.1596	NA
1841	CALM1	1953.26	0.349167	0.11913	22.1585	0.00048849	0.00314874
1842	CALM2	1802.35	0.108499	0.127099	7.43588	0.190188	0.305533
1843	CALM3	634.306	0.368082	0.154563	23.0929	0.000324036	0.00224438
1844	CALML4	286.085	0.584617	0.303951	9.03057	0.107851	0.201232
1845	CALN1	146.507	0.547812	0.372087	3.79307	0.579577	0.675655
1846	CALR	15212.9	-0.623073	0.183452	14.1984	0.0143972	0.0442797
1847	CALR3	125.877	0.0290432	0.208488	3.22449	0.665421	0.744678
1848	CALU	2695.39	-0.201446	0.188283	14.8041	0.0112331	0.0365792
1849	CALY	19.5486	0.488284	0.455926	14.4298	0.013098	0.0411659
1850	CAMK1	370.333	0.0280377	0.156976	10.8383	0.0546816	0.121066
1851	CAMK1D	249.574	-1.17827	0.438465	28.8309	2.50271e-05	0.000285953
1852	CAMK1G	6.96715	0.493392	0.579381	7.67469	0.175099	0.287556
1853	CAMK2A	281.753	0.7336	0.343428	13.0805	0.0226356	0.0624596
1854	CAMK2B	149.87	0.57311	0.337543	9.76444	0.0821915	0.163864
1855	CAMK2D	678.167	0.0604752	0.140868	11.3009	0.0457302	0.105717
1856	CAMK2G	194.342	0.341635	0.216731	4.76171	0.445648	0.561169
1857	CAMK2N1	65.9754	0.139653	0.335357	8.55749	0.128071	0.228915
1858	CAMK2N2	18.6374	0.687188	0.441528	20.2105	0.00114099	0.00619891
1859	CAMK4	25.2648	0.460572	0.300059	22.8394	0.000362275	0.00245529
1860	CAMKK1	20.8364	0.682046	0.501053	6.19216	0.287968	0.410514
1861	CAMKK2	136.838	0.533384	0.253624	16.436	0.00570345	0.0218932
1862	CAMKMT	83.8414	0.0815128	0.306855	20.0215	0.00123817	0.00660412
1863	CAMKV	77.9693	0.624874	0.348443	8.7001	0.121641	0.220338
1864	CAMLG	190.06	-0.336609	0.216155	13.7812	0.0170609	0.0505237
1865	CAMSAP1	502.604	0.173733	0.224211	6.98408	0.221827	0.342072
1866	CAMSAP2	697.779	0.0116817	0.278944	40.636	1.11134e-07	2.98263e-06
1867	CAMSAP3	417.145	-0.517791	0.172652	25.799	9.76138e-05	0.000871316
1868	CAMTA1	153.507	0.140688	0.289273	4.97233	0.419266	0.537276
1869	CAMTA2	385.426	-0.110074	0.133533	5.23239	0.388183	0.5088
1870	CAND1	1274.34	-0.305476	0.193092	27.5268	4.50295e-05	0.000463144
1871	CAND2	7.33107	1.88966	0.642386	17.435	0.00374463	0.0158209
1872	CANT1	995.256	-0.257071	0.250342	12.4087	0.0295971	0.0762015
1873	CANX	5262.33	0.0578845	0.129839	11.9477	0.0355118	0.0873319
1874	CAP1	1704.5	-0.182415	0.132084	8.48733	0.131345	0.23316
1875	CAP2	48.4368	1.52305	0.281355	48.5606	2.72888e-09	1.18247e-07
1876	CAPG	61.9896	0.540461	0.371195	5.83219	0.322892	0.445601
1877	CAPN1	292.036	-0.0121035	0.236558	2.28079	0.809084	0.858877
1878	CAPN10	101.488	0.0601931	0.273415	12.9644	0.0237147	0.0646545
1879	CAPN11	3.50988	-0.00685116	1.18171	4.25497	0.513321	0.62135
1880	CAPN12	0.938192	0.398155	2.16496	5.50764	0.357109	NA
1881	CAPN13	64.3132	3.06599	1.00767	22.8216	0.000365133	0.00247049
1882	CAPN15	482.669	-0.0260685	0.145836	4.44313	0.487528	0.598648
1883	CAPN2	772.888	0.144299	0.223365	19.1076	0.00183539	0.0090425
1884	CAPN3	16.0142	1.91956	0.878171	4.27408	0.510667	0.619163
1885	CAPN5	215.8	1.10421	0.453475	34.0591	2.31735e-06	4.00577e-05
1886	CAPN6	18.6086	-0.779123	0.847872	9.18245	0.102005	0.19308
1887	CAPN7	344.594	0.100266	0.165655	19.3078	0.00168419	0.00845567
1888	CAPN8	8.30504	0.27815	0.789358	11.6339	0.0401642	0.0955689
1889	CAPN9	0.179447	0.115067	5.30442	0.25331	0.99843	NA
1890	CAPNS1	874.28	0.0894336	0.120092	6.59308	0.252705	0.375217
1891	CAPNS2	0.132398	-1.21212	5.30442	0.0190928	0.999997	NA
1892	CAPRIN1	912.787	-0.0274873	0.159846	7.15855	0.209114	0.32794
1893	CAPS	15.2317	0.511218	0.471081	12.2465	0.0315617	0.0801557
1894	CAPS2	0.349953	-0.639992	4.21744	1.18692	0.946126	NA
1895	CAPSL	3.63631	1.65146	1.35993	12.7743	0.025588	0.0683652
1896	CAPZA1	705.251	-0.0425657	0.182699	6.56612	0.254958	0.377796
1897	CAPZA2	854.75	0.132275	0.171626	7.54257	0.183313	0.29731
1898	CAPZA3	0	NA	NA	NA	NA	NA
1899	CAPZB	1099.38	-0.0482406	0.107969	17.0719	0.00436552	0.0177851
1900	CARD10	451.816	-0.106609	0.262164	8.90821	0.112782	0.207914
1901	CARD11	36.0346	-0.429221	0.387774	10.6942	0.0577927	0.126444
1902	CARD14	0.977564	3.37735	1.64397	4.89565	0.428747	NA
1903	CARD19	39.1267	0.834485	0.39095	29.2368	2.08344e-05	0.000248099
1904	CARD6	1.92452	0.0878426	1.21661	1.97462	0.852646	0.891579
1905	CARD9	48.4106	0.13843	0.420426	27.9812	3.67083e-05	0.000391587
1906	CARF	44.7632	0.261342	0.306666	14.4191	0.0131553	0.0412975
1907	CARHSP1	158.127	-0.108142	0.484379	17.9269	0.00303949	0.0134386
1908	CARM1	427.711	0.156612	0.143688	13.9455	0.0159594	0.0480006
1909	CARMIL1	116.683	0.616944	0.35463	20.5064	0.00100374	0.00557378
1910	CARMIL2	19.2369	0.171502	0.432167	4.22078	0.518087	0.625283
1911	CARMIL3	43.1537	0.438021	0.598127	12.5601	0.0278695	0.0729571
1912	CARNMT1	509.273	-0.15658	0.236815	9.33436	0.0964483	0.184716
1913	CARNS1	108.447	3.0643	0.584271	44.3351	1.98036e-08	6.78811e-07
1914	CARS1	634.412	0.267159	0.161629	35.2328	1.35193e-06	2.49239e-05
1915	CARS2	366.824	0.484519	0.179779	24.0322	0.000214037	0.00163461
1916	CARTPT	4.14636	0.282288	0.754542	5.61932	0.345039	0.46726
1917	CASC3	425.441	-0.237477	0.187533	21.6497	0.000610265	0.00374737
1918	CASD1	270.84	-0.176029	0.237845	23.6676	0.000251477	0.00185799
1919	CASK	151.156	-0.490195	0.204954	6.72792	0.241674	0.362975
1920	CASKIN1	25.1075	0.390879	0.359198	5.62882	0.344027	0.466086
1921	CASKIN2	380.453	-0.0747474	0.173529	10.8555	0.0543208	0.1204
1922	CASP14	0.53686	-0.248349	3.14687	2.99333	0.701015	NA
1923	CASP2	44.6967	-0.175904	0.330047	4.80876	0.439662	0.555967
1924	CASP3	204.294	0.278285	0.28417	10.1919	0.0699775	0.145682
1925	CASP7	154.289	-0.0422893	0.232048	6.85897	0.231342	0.352283
1926	CASP8	72.9298	0.0647349	0.254801	1.87252	0.866488	0.902122
1927	CASP8AP2	68.3105	-0.707371	0.292413	29.4884	1.85933e-05	0.000226616
1928	CASP9	98.1287	-0.250672	0.23309	25.2683	0.000123659	0.00105332
1929	CASQ1	49.7006	1.16927	0.540268	7.88536	0.162668	0.273369
1930	CASQ2	19.1829	2.48275	0.672857	26.9684	5.78561e-05	0.00057026
1931	CASR	0.309096	0.964163	4.33671	0.860208	0.973035	NA
1932	CASS4	3.38997	-1.06774	0.971301	4.42528	0.489943	0.6007
1933	CAST	655.353	-0.0646282	0.275799	6.39383	0.269761	0.392176
1934	CASTOR1	50.7556	-0.449779	0.241714	15.7511	0.00759183	0.0272179
1935	CASTOR2	96.2646	0.669489	0.298265	16.5726	0.00538591	0.0209109
1936	CASZ1	7.08692	0.966161	0.685817	7.01255	0.219709	0.340011
1937	CAT	39227.7	-0.345477	0.174257	11.1941	0.0476638	0.109021
1938	CATIP	1.92971	2.67044	1.45886	10.6447	0.0588968	0.128244
1939	CATSPER1	0.185967	1.62337	5.27641	0.559232	0.989794	NA
1940	CATSPER2	27.4712	-0.707171	0.464621	6.12032	0.294686	0.417243
1941	CATSPER3	0	NA	NA	NA	NA	NA
1942	CATSPER4	0.11586	0.634466	5.30442	-0.0655806	1	NA
1943	CATSPERB	0.0426858	0.288181	5.30442	-0.885492	1	NA
1944	CATSPERD	0.319384	-0.898539	3.29409	0.899356	0.970268	NA
1945	CATSPERE	0	NA	NA	NA	NA	NA
1946	CATSPERG	32.2197	0.0240344	0.371793	7.81566	0.166692	0.277923
1947	CATSPERZ	8.99007	-0.551236	0.541334	12.9884	0.0234879	0.0642162
1948	CAV1	80.5661	0.430947	0.547155	12.6842	0.0265248	0.0702724
1949	CAV2	44.1042	1.07209	0.523417	22.783	0.000371387	0.00250648
1950	CAVIN1	262.98	-0.245966	0.417676	8.672	0.122884	0.222095
1951	CAVIN2	120.75	0.0911269	0.406565	10.6303	0.0592229	0.128797
1952	CAVIN3	56.8333	-1.88903	0.667685	15.0245	0.0102581	0.0341286
1953	CAVIN4	16.5649	2.50284	0.474922	42.0658	5.71265e-08	1.68199e-06
1954	CBARP	29.9116	0.209372	0.49444	12.3905	0.0298116	0.0766433
1955	CBFA2T2	96.2992	0.131714	0.206713	3.54707	0.616278	0.70605
1956	CBFA2T3	26.3435	-0.112064	0.408582	3.04418	0.693175	0.767351
1957	CBFB	217.434	0.1585	0.239817	9.60101	0.0873626	0.171441
1958	CBL	243.438	0.00396106	0.251114	6.42575	0.266967	0.390053
1959	CBLB	120.96	0.223224	0.274433	3.01702	0.697361	0.770659
1960	CBLC	15.6781	0.4437	0.674738	22.5824	0.00040561	0.00269621
1961	CBLIF	1.67482	-2.65702	2.02105	11.8936	0.0362747	0.0886383
1962	CBLL1	244.37	-0.215904	0.307842	16.0293	0.00676097	0.0249459
1963	CBLN1	6.10711	0.763736	0.643449	11.8453	0.0369706	0.0899015
1964	CBLN2	10.9605	1.05937	0.522722	17.0803	0.00435007	0.0177312
1965	CBLN3	1.51741	0.183389	1.42498	0.859934	0.973054	0.982219
1966	CBLN4	1.79707	2.08962	1.60172	7.30134	0.199176	0.316243
1967	CBR4	165.067	0.290716	0.226034	6.67689	0.2458	0.367682
1968	CBS	15205.6	0.486873	0.189591	27.1881	5.24274e-05	0.00052447
1969	CBX1	486.336	-0.422892	0.130253	21.8805	0.000551713	0.00346286
1970	CBX2	25.0649	-0.37987	0.569706	9.24723	0.0996001	0.18951
1971	CBX3	677.313	-0.219494	0.184963	16.1189	0.00651261	0.024241
1972	CBX4	242.824	0.347696	0.329212	15.1039	0.00992747	0.0334045
1973	CBX5	184.966	-0.149396	0.183443	13.6852	0.0177375	0.0520914
1974	CBX6	179.784	-0.10307	0.300062	11.555	0.0414215	0.0978965
1975	CBX7	143.634	-0.166991	0.226008	4.41801	0.490927	0.60149
1976	CBX8	63.2052	0.3624	0.280697	12.4388	0.0292457	0.0756727
1977	CBY1	102.817	0.245985	0.27923	15.1467	0.00975343	0.0330306
1978	CBY2	0.756926	1.59904	2.73946	2.58344	0.76388	NA
1979	CBY3	0.535588	0.0136666	2.55224	0.995965	0.962891	NA
1980	CC2D1A	250.671	0.315248	0.148137	25.5864	0.000107322	0.000944211
1981	CC2D1B	745.445	0.173506	0.163852	19.3674	0.00164155	0.00829077
1982	CC2D2A	16.1651	0.178148	0.44536	12.2406	0.0316359	0.0802807
1983	CC2D2B	0.758779	-2.05141	2.00572	3.81948	0.575688	NA
1984	CCAR1	398.448	-0.367826	0.196472	30.5827	1.13227e-05	0.000151687
1985	CCAR2	639.722	-0.220019	0.11749	16.854	0.00478518	0.0190838
1986	CCBE1	58.6159	-0.481311	0.293802	10.3083	0.0669565	0.141037
1987	CCDC102A	15.714	0.173341	0.568476	9.10858	0.104811	0.196816
1988	CCDC102B	2.66063	-1.2816	1.00966	7.28578	0.200239	0.317429
1989	CCDC103	2.28997	0.63169	1.37722	6.7739	0.238006	0.359333
1990	CCDC105	0.356541	2.40892	5.26159	1.00665	0.962028	NA
1991	CCDC106	17.5291	0.402336	0.434902	10.1257	0.0717523	0.148454
1992	CCDC107	426.106	0.277807	0.257461	3.74404	0.586823	0.680942
1993	CCDC110	1.25367	-0.448324	1.75569	2.69593	0.746741	NA
1994	CCDC112	70.343	-0.670684	0.367261	9.68913	0.0845384	0.167369
1995	CCDC113	0.430751	0.0123777	2.78466	1.81217	0.874476	NA
1996	CCDC115	148.364	0.160355	0.248566	3.91658	0.561488	0.661038
1997	CCDC116	0.173164	0.436577	5.3026	0.455425	0.993665	NA
1998	CCDC117	282.357	0.0177828	0.318664	55.1138	1.23684e-10	7.33705e-09
1999	CCDC12	169.704	-0.408943	0.181117	25.2561	0.000124333	0.00105643
[truncated: 22,206 more rows]

## Sheet: Gene Clustering
genes	cluster
A1BG	1
ABAT	1
ABCA2	1
ABCC8	1
ABCD2	1
ABHD2	1
ABLIM2	1
ACAA2	1
ACP6	1
ACSBG1	1
ACSL6	1
ACSM1	1
ACTC1	1
ACTN2	1
ADCY2	1
ADGRD1	1
ADGRL1	1
ADH7	1
ADM2	1
ADPGK	1
AFAP1L1	1
AGAP1	1
AGBL1	1
AGK	1
AGMAT	1
AIFM3	1
AIG1	1
AK1	1
AKR7A2	1
ALPK2	1
AMD1	1
AMT	1
ANK3	1
ANKRD1	1
ANXA2	1
AP1S1	1
APC2	1
APLP1	1
APOH	1
ARHGEF26	1
ARL15	1
ARL4C	1
ARMC12	1
ARMCX1	1
ASB2	1
ATG4B	1
ATP1A2	1
ATP1A3	1
ATP2B4	1
ATP2C2	1
ATP5MC3	1
ATPAF2	1
B3GALT4	1
BCL7C	1
BCR	1
BIN1	1
BMP6	1
BOLA3	1
BPIFB6	1
BSG	1
BSN	1
C11H10orf90	1
C1QTNF5	1
C4H3orf18	1
C5	1
C5H1orf216	1
C7H4orf33	1
CA14	1
CACNA1B	1
CACNA1C	1
CACNA2D2	1
CACNB1	1
CADM3	1
CADPS	1
CALM1	1
CAP2	1
CAPN5	1
CARNS1	1
CARS2	1
CASQ2	1
CAV2	1
CAVIN4	1
CBS	1
CCDC120	1
CCDC136	1
CCDC157	1
CCDC30	1
CCDC9B	1
CCND1	1
CDC42EP1	1
CDS1	1
CEBPA	1
CFAP36	1
CFAP90	1
CHGA	1
CIAPIN1	1
CIDEC	1
CIT	1
CKMT2	1
CLEC2L	1
CLSTN3	1
CLU	1
CMBL	1
CMYA5	1
CNBD2	1
COL16A1	1
COL9A3	1
COMT	1
CORO1C	1
CORO6	1
CPLX2	1
CPT1B	1
CRIP1	1
CRYAB	1
CSRP3	1
CTTN	1
CUX2	1
CX3CL1	1
CYFIP2	1
CYSTM1	1
DAP	1
DAPK3	1
DBNDD2	1
DCAKD	1
DGKG	1
DGKZ	1
DMD	1
DMPK	1
DNAJA4	1
DNAJC5	1
DNM1	1
DNM1L	1
DPYSL2	1
DUSP12	1
DUSP22	1
ECHDC3	1
ECHS1	1
EEF1A2	1
EEPD1	1
EFHC2	1
EGF	1
EIF4EBP1	1
ELAPOR1	1
ENDOG	1
ENO2	1
ENPP5	1
EPB41L4B	1
EPHB6	1
EPPK1	1
ETNK2	1
ETNPPL	1
FAAH	1
FABP1	1
FABP3	1
FAIM	1
FAM53B	1
FASTK	1
FBXL8	1
FBXO40	1
FBXW5	1
FEZ2	1
FGF12	1
FGF13	1
FGFR4	1
FHOD3	1
FIRRM	1
FKBP5	1
FLVCR2	1
FMNL3	1
FMO3	1
FNTB	1
FUT9	1
FXYD1	1
GAD2	1
GAL3ST1	1
GALT	1
GAP43	1
GAS2L1	1
GCHFR	1
GCNT2	1
GDE1	1
GDPD5	1
GET4	1
GHDC	1
GIPC1	1
GJC3	1
GLO1	1
GMPR	1
GNB3	1
GPR22	1
GPRC5B	1
GRHPR	1
GRIK4	1
GRTP1	1
GSTCD	1
GSTM3	1
GSTZ1	1
HDAC11	1
HECTD2	1
HHATL	1
HHLA2	1
HK2	1
HMCN1	1
HMCN2	1
HPD	1
HRC	1
HSPA2	1
HSPA4L	1
HSPB6	1
HSPB7	1
HTRA1	1
ICAM1	1
IL17RA	1
IL34	1
INA	1
INAVA	1
IRX5	1
ITIH1	1
JPH2	1
JPH3	1
JPT1	1
JUP	1
KCNE3	1
KCNJ10	1
KCNQ1	1
KIF21A	1
KIF3C	1
KIF5A	1
KLC2	1
KLHL21	1
KLHL31	1
LACTB	1
LARGE2	1
LCLAT1	1
LCNL1	1
LDAF1	1
LDB3	1
LDHB	1
LGI3	1
LMO4	1
LMOD2	1
LOC101536928	1
LOC101537051	1
LOC101537407	1
LOC101540905	1
LOC101541023	1
LOC101542729	1
LOC101544869	1
LOC101545907	1
LOC101546106	1
LOC101546243	1
LOC101546518	1
LOC101546803	1
LOC101547102	1
LOC101547971	1
LOC101548951	1
LOC101550004	1
LOC101551148	1
LOC101551220	1
LOC101553277	1
LOC101554376	1
LOC101555275	1
LOC101555490	1
LOC101555837	1
LOC101556738	1
LOC101557147	1
LOC101558332	1
LOC105942791	1
LOC105943340	1
LOC129399182	1
LOC129399856	1
LOC129399889	1
LOC129399917	1
LOC129399971	1
LOC129400027	1
LOC129401488	1
LOC129401654	1
LOC129402190	1
LOC129403567	1
LOC129403690	1
LOC129404438	1
LOC129405051	1
LOC129406451	1
LOC129406763	1
LOC129406787	1
LOC129406846	1
LOC129407133	1
LPAR3	1
LRRC10	1
LRRC14B	1
MAP1A	1
MAP1B	1
MAP1LC3B	1
MAP7D1	1
MAPK8IP1	1
MAPK8IP2	1
MAPRE3	1
MAPT	1
MARVELD3	1
MB	1
MBP	1
MCCC2	1
MCU	1
MEA1	1
MED30	1
MEF2A	1
MEGF9	1
METTL27	1
MFF	1
MFGE8	1
MFSD12	1
MLF1	1
MOBP	1
MOV10	1
MRGBP	1
MROH6	1
MRPL15	1
MUC5B	1
MYBPC3	1
MYL2	1
MYL3	1
MYLK3	1
MYLK4	1
MYO18B	1
MYO3A	1
MYOM1	1
MYOM2	1
MYOZ2	1
NADSYN1	1
NAPRT	1
NAT9	1
NCS1	1
NDRG2	1
NDUFB1	1
NDUFS7	1
NECAB2	1
NEFL	1
NEFM	1
NEXN	1
NFS1	1
NHERF1	1
NMRK2	1
NOL3	1
NOX3	1
NPPA	1
NPPB	1
NRG1	1
NSG1	1
NSMCE2	1
NSMF	1
NT5C3B	1
NYAP1	1
OAZ1	1
OBSCN	1
OGDHL	1
OGFR	1
OMA1	1
ORAI1	1
OTUB2	1
OXCT1	1
P2RX6	1
PAQR4	1
PCBD1	1
PCED1A	1
PCSK7	1
PDE6A	1
PDK2	1
PDLIM2	1
PDZK1IP1	1
PEA15	1
PECR	1
PERM1	1
PFKP	1
PHKG1	1
PHLDA1	1
PHYH	1
PIAS2	1
PKIB	1
PLA2G6	1
PLA2G7	1
PLCD1	1
PLCD4	1
PLEKHB1	1
PLEKHH1	1
PLEKHH3	1
PLEKHM2	1
PLIN3	1
PLLP	1
PLN	1
PLP1	1
PLPP5	1
PPARA	1
PPL	1
PPM1J	1
PPM1L	1
PPP1R12B	1
PRKAB2	1
PRKN	1
PRNP	1
PRR5	1
PRRX2	1
PSAP	1
PTGDS	1
PTGER3	1
PTPA	1
PTPN13	1
PTPN3	1
PTPN5	1
PTPRT	1
PYCR1	1
PYGB	1
PYGM	1
PYROXD1	1
QPRT	1
RAB13	1
RAB15	1
RAB1B	1
RAB20	1
RAB24	1
RAB30	1
RAB5IF	1
RAB6B	1
RABEPK	1
RAD18	1
RALGPS2	1
RAMP1	1
RASGRP3	1
RBM24	1
RD3	1
RDH5	1
REN	1
REXO4	1
RFC5	1
RFK	1
RGL2	1
RGS4	1
RHPN2	1
RIPK4	1
RMND5B	1
RNASE4	1
RND2	1
RNF207	1
ROR2	1
RPH3A	1
RPH3AL	1
RPL37A	1
RPL3L	1
RPUSD3	1
RRAD	1
RTN3	1
RTN4RL2	1
RUNDC3A	1
RXRG	1
RYR2	1
SAMD4A	1
SBK1	1
SBSPON	1
SCARB1	1
SCCPDH	1
SCN2B	1
SCN4B	1
SCRT1	1
SDC1	1
SDR39U1	1
SEC16B	1
SEMA4A	1
SEPSECS	1
SEPTIN6	1
SGPP2	1
SH3YL1	1
SHANK1	1
SIGMAR1	1
SIRT5	1
SLC12A8	1
SLC19A2	1
SLC22A13	1
SLC24A2	1
SLC25A19	1
SLC25A39	1
SLC25A4	1
SLC25A47	1
SLC27A6	1
SLC29A1	1
SLC2A12	1
SLC2A4	1
SLC34A3	1
SLC35E3	1
SLC39A4	1
SLC3A1	1
SLC4A3	1
SLC6A12	1
SLC6A8	1
SNCB	1
SNX21	1
SOD3	1
SOHLH2	1
SORCS2	1
SPON1	1
SPTBN4	1
SRD5A1	1
SRL	1
ST14	1
ST3GAL1	1
ST6GALNAC6	1
STC2	1
STK39	1
STK40	1
STUM	1
STX1B	1
SYBU	1
SYCE1	1
SYNGR1	1
SYNJ2	1
SYNPO	1
SYNPO2	1
SYT1	1
SYT2	1
TAFA1	1
TAFAZZIN	1
TARS2	1
TBC1D7	1
TCAP	1
TCFL5	1
TDRP	1
TECRL	1
TESK2	1
THNSL2	1
THSD8	1
TINAGL1	1
TK1	1
TLCD3B	1
TLE5	1
TLN2	1
TM9SF4	1
TMCO1	1
TMEM132C	1
TMEM74	1
TMEM82	1
TMEM86B	1
TMOD1	1
TNIK	1
TNIP2	1
TNNC1	1
TNNI3	1
TNNT2	1
TPM4	1
TRIM11	1
TRIM54	1
TRIM62	1
TRIM63	1
TRNP1	1
TSPAN6	1
TST	1
TTC39B	1
TTC39C	1
TTLL11	1
TTN	1
TXLNB	1
TXN2	1
TXNRD2	1
TYRO3	1
UNC13A	1
UNC45B	1
UPK2	1
USP13	1
USP27X	1
VAPB	1
VARS2	1
VAT1L	1
VLDLR	1
VPS37D	1
VWCE	1
WDR11	1
WDR5	1
WNK2	1
WSB2	1
XIRP2	1
ZBTB10	1
ZBTB46	1
ZCCHC24	1
AAMDC	2
ABCG2	2
ABLIM3	2
ACAD9	2
ACP5	2
ARHGDIB	2
ASB8	2
ASGR1	2
BLOC1S3	2
BMF	2
C6H5orf24	2
CASP8AP2	2
CBX1	2
CDKN1B	2
CHIC2	2
CHRNB3	2
CNTN1	2
CREG1	2
CTDSPL2	2
CXXC4	2
CYLD	2
CYRIA	2
DBNL	2
DCAF5	2
DIO2	2
DTYMK	2
EEF2K	2
EIF4B	2
EMB	2
ERBIN	2
FADS1	2
FAM8A1	2
FDPS	2
FEZ1	2
FGFR3	2
FHIP2A	2
FMO4	2
GABARAPL1	2
GK5	2
GPANK1	2
HMGCR	2
HOOK3	2
HSD17B2	2
HSD17B7	2
ID4	2
IDI1	2
IER5	2
IGFBP2	2
ILVBL	2
IRGQ	2
KAT7	2
KLKB1	2
LARS1	2
LOC101541861	2
LOC101542379	2
LOC101542649	2
LOC101543789	2
LOC101545561	2
LOC101546556	2
LOC101547469	2
LOC101550296	2
LOC101551884	2
LOC101551999	2
LOC101553045	2
LOC101554364	2
LOC101555443	2
LOC101555447	2
LOC101557794	2
LOC101558028	2
LOC101558270	2
LOC101558667	2
LOC101558860	2
LOC129399329	2
LOC129399330	2
LOC129399403	2
LOC129399863	2
LOC129399982	2
LOC129401952	2
LOC129402093	2
LOC129402551	2
LOC129403328	2
LOC129404293	2
LOC129404871	2
LOC129405821	2
LOC129406836	2
LYPLA1	2
LYSMD1	2
MAGEH1	2
MAP4K4	2
MIA3	2
MLLT10	2
NECTIN1	2
NEDD9	2
NR1H4	2
NSDHL	2
NUDT19	2
ODR4	2
OGA	2
PAICS	2
PAPSS2	2
PBDC1	2
PDS5B	2
PEBP4	2
PGAP6	2
PHLDB3	2
PITPNB	2
PLEKHM3	2
PPAT	2
PSMB10	2
PSME2	2
RAB23	2
RBM5	2
REV3L	2
RGS9BP	2
RIOK2	2
RNF168	2
RPS6KA3	2
RRM2	2
RSF1	2
RUSC2	2
SCP2	2
SERPINF1	2
SH3BP5L	2
SKAP1	2
SLC26A4	2
SLCO2B1	2
SMARCD2	2
SMC2	2
SMC4	2
SORBS1	2
SRD5A2	2
STARD4	2
TDRD6	2
TET3	2
TLN1	2
TMEM64	2
TNFAIP6	2
TNKS	2
TOB1	2
TP53INP2	2
TRAF3IP1	2
TRAM1	2
TSC22D3	2
TUT4	2
U2AF2	2
UAP1	2
USP45	2
UTP14A	2
UTP23	2
VCAM1	2
WDR31	2
ZBTB7B	2
ZFPM1	2
ZHX1	2
ZNF629	2
ZNF7	2
AATK	3
ABCB8	3
ABCC6	3
ABHD17A	3
ABR	3
ADAM11	3
ADAP2	3
ADCYAP1R1	3
ADD1	3
ADGRB1	3
ADGRG2	3
ADRA2C	3
AGAP2	3
AGO4	3
AGPAT2	3
AMPD2	3
ANK2	3
ANKRD13B	3
AP1G2	3
APBA1	3
APLP2	3
ARHGEF37	3
ARHGEF4	3
ARMC9	3
ARNT2	3
ATP2B3	3
ATP6V0E2	3
B4GALT7	3
C1RL	3
C2H3orf33	3
C3H11orf52	3
CACNA1H	3
CALM3	3
CAMK2N2	3
CAMKMT	3
CARD19	3
CC2D1A	3
CCDC40	3
CCDC57	3
CCDC89	3
CCDC92	3
CDC42BPG	3
CDKN1C	3
CEND1	3
CENPU	3
CEP131	3
CEP164	3
CHGB	3
CHL1	3
CHPF	3
CHRD	3
CISD3	3
CITED2	3
CITED4	3
CIZ1	3
CKB	3
CLCN7	3
CLSTN1	3
COPS7B	3
CORO2B	3
CPLX1	3
CPN2	3
CTNND2	3
CTXND1	3
CXH1orf21	3
CYREN	3
DAXX	3
DIPK1B	3
DOK4	3
DOK7	3
DYSF	3
EFR3B	3
EGFL7	3
ELOB	3
EML2	3
ENHO	3
ERMN	3
EVI5L	3
FAM20A	3
FAM234A	3
FAM241B	3
FAM83F	3
FAM98C	3
FARP1	3
FBXO31	3
FGFR1	3
FLYWCH1	3
GABRG2	3
GDPGP1	3
GGA3	3
GINS4	3
GLRA1	3
GNG7	3
GNPDA1	3
GPC1	3
GPSM1	3
GTF2IRD1	3
GYG1	3
H1.4	3
HABP2	3
HGFAC	3
HJV	3
HSD17B1	3
IDUA	3
IFNGR2	3
IGF2BP3	3
IGFALS	3
IMPDH1	3
INSYN1	3
ISOC2	3
ISYNA1	3
ITM2C	3
JADE1	3
JAG2	3
KCNC3	3
KCNJ11	3
KCNK10	3
KIAA0930	3
KIF1A	3
KIF26A	3
KIFC2	3
KIRREL3	3
KLHL10	3
KLHL8	3
LAMA5	3
LAMC1	3
LDOC1	3
LIMD2	3
LIPE	3
LMAN2L	3
LMNTD2	3
LOC101540036	3
LOC101540504	3
LOC101540995	3
LOC101541302	3
LOC101543843	3
LOC101550043	3
LOC101550312	3
LOC101554148	3
LOC101554161	3
LOC101555226	3
LOC101555270	3
LOC101555797	3
LOC101556259	3
LOC101559384	3
LOC129398789	3
LOC129402086	3
LOC129402103	3
LOC129402127	3
LOC129403501	3
LOC129405065	3
LOC129405616	3
LOC129406070	3
LPCAT1	3
LRG1	3
LRRC45	3
LRSAM1	3
LYNX1	3
MAP1LC3A	3
MDH2	3
MGLL	3
MICALL2	3
MKS1	3
MOGAT3	3
MOV10L1	3
MRPL21	3
MRPL49	3
MRPS24	3
MRPS6	3
MUS81	3
MYH7B	3
MYL9	3
NAA40	3
NAGLU	3
NANOS1	3
NCAM1	3
NCKIPSD	3
NECTIN2	3
NEFH	3
NEURL2	3
NFKBIE	3
NHERF2	3
NRAP	3
NRTN	3
NRXN2	3
NSUN2	3
NUDT3	3
OSBPL5	3
PCP4	3
PDE6C	3
PGGHG	3
PGM1	3
PGRMC2	3
PGS1	3
PHOSPHO1	3
PID1	3
PIDD1	3
PITPNM2	3
PKM	3
PLCB3	3
PLIN5	3
PLK5	3
PLXND1	3
PNKD	3
PNPLA6	3
PODXL2	3
PPIF	3
PPM1F	3
PPP1R3C	3
PREPL	3
PRKAG3	3
PRKCD	3
PROZ	3
PSD	3
PSEN2	3
PTGIS	3
PXYLP1	3
RAB11FIP5	3
RAB26	3
RAB3A	3
RAB3IL1	3
RAC3	3
RCC1L	3
RGS19	3
RHNO1	3
RHOBTB3	3
RPUSD1	3
RTL6	3
RTP5	3
RXRA	3
S1PR2	3
SCARA5	3
SCD	3
SCG2	3
SCN9A	3
SCNN1D	3
SCYL3	3
SDC2	3
SEC14L1	3
SERPINF2	3
SEZ6	3
SH3BP4	3
SHF	3
SHISAL1	3
SIN3B	3
SIRT4	3
SIRT7	3
SLC12A5	3
SLC22A17	3
SLC25A10	3
SLC25A11	3
SLC25A12	3
SLC28A3	3
SLC2A8	3
SLC38A10	3
SLC6A1	3
SLC6A11	3
SLC6A17	3
SLCO1A2	3
SLURP2	3
SMIM30	3
SMOX	3
SOWAHA	3
SP7	3
STMN3	3
STX6	3
STXBP1	3
SUMO3	3
SV2A	3
SYT11	3
TBC1D16	3
TECPR1	3
TECTB	3
TFE3	3
TFEB	3
TFR2	3
THRB	3
THY1	3
TIMM21	3
TJP3	3
TMC6	3
TMEM104	3
TMEM140	3
TMEM179	3
TMEM270	3
TMEM38A	3
TMEM53	3
TMUB1	3
TNRC18	3
TOMM40L	3
TPCN2	3
TRABD	3
TRIM3	3
TSEN54	3
TTC9	3
TUB	3
UBE2QL1	3
UCKL1	3
VAMP1	3
VAV2	3
VEGFB	3
WDR91	3
XYLT1	3
XYLT2	3
YIPF2	3
ZER1	3
ZMIZ2	3
ZNF184	3
ZNF346	3
ZNF579	3
ZNF608	3
ZNHIT2	3
ABCB1	4
ABHD13	4
ABHD17B	4
ABI1	4
ACAD11	4
ACMSD	4
ACOT12	4
ACSL4	4
ACTR3	4
ACTR8	4
ADAM10	4
ADAM9	4
AFTPH	4
AGMO	4
AGO2	4
AGO3	4
AGXT2	4
AHCTF1	4
AHCYL2	4
AHR	4
AHSA1	4
AHSA2P	4
AKAP10	4
AKAP13	4
AKAP9	4
AKR1D1	4
ALDH1A1	4
ALDH3A2	4
AMOT	4
ANKHD1	4
ANKLE2	4
ANKMY2	4
ANKRD12	4
ANO3	4
ANXA1	4
AOX1	4
AP1AR	4
AP1G1	4
APH1B	4
APPL1	4
AQP9	4
ARCN1	4
AREL1	4
ARFGEF1	4
ARID4B	4
ARID5B	4
ARIH1	4
ARIH2	4
ARL4A	4
ARL5B	4
ARMC1	4
ARPC2	4
ASAH1	4
ATAD2B	4
ATF2	4
ATG12	4
ATM	4
ATP11C	4
ATP13A3	4
ATP2C1	4
ATP6V1D	4
ATP7A	4
ATPAF1	4
ATRX	4
B3GNT2	4
BAG5	4
BAZ1A	4
BAZ1B	4
BAZ2B	4
BBS4	4
BCL2L13	4
BCLAF1	4
BLTP2	4
BMS1	4
BNIP2	4
BNIP3L	4
BPNT1	4
BRAP	4
BRIX1	4
BRMS1L	4
BROX	4
BSDC1	4
BTAF1	4
C2H3orf38	4
C5H1orf52	4
C6H5orf15	4
CAMSAP2	4
CAND1	4
CASC3	4
CCAR1	4
CCDC117	4
CCDC47	4
CCDC77	4
CCL25	4
CCNDBP1	4
CCNT1	4
CCNYL1	4
CCT2	4
CCT3	4
CCT4	4
CCT6A	4
CD2AP	4
CD53	4
CDADC1	4
CDC42SE1	4
CDKL5	4
CDKN2AIP	4
CEBPG	4
CEP85L	4
CES1	4
CGGBP1	4
CHD1	4
CHM	4
CHMP5	4
CHORDC1	4
CLCC1	4
CLCN3	4
CLCN5	4
CLDND1	4
CLP1	4
CLPX	4
CLTC	4
CMPK1	4
CMTR1	4
CNBP	4
CNNM4	4
CNOT1	4
CNOT6L	4
CNOT7	4
CNST	4
COG3	4
COPB1	4
COPS2	4
CPEB3	4
CPEB4	4
CRK	4
CROT	4
CSE1L	4
CSGALNACT2	4
CSNK1G3	4
CSPP1	4
CSRP2	4
CSTF2	4
CSTF3	4
CTCF	4
CTDSPL	4
CTNNB1	4
CTR9	4
CUL3	4
CUL5	4
CXCL13	4
CXCL9	4
CYFIP1	4
DARS1	4
DCAF12	4
DCAF13	4
DDX17	4
DDX18	4
DDX21	4
DDX3X	4
DDX5	4
DDX6	4
DENND1B	4
DENND4C	4
DHX15	4
DHX36	4
DIAPH2	4
DLAT	4
DMRT2	4
DMXL1	4
DNA2	4
DNAJA1	4
DNAJA2	4
DNAJB1	4
DNAJB11	4
DNAJB12	4
DNAJB4	4
DNAJB9	4
DNAJC16	4
DNAJC28	4
DNAJC3	4
DNTTIP2	4
DPH3	4
DPYD	4
DRAM2	4
DTX3L	4
DUS4L	4
DYNC1I2	4
EEA1	4
EEF1A1	4
EFR3A	4
EGLN1	4
EIF1	4
EIF1AD	4
EIF1AX	4
EIF1B	4
EIF2AK3	4
EIF2S3	4
EIF3E	4
EIF3M	4
EIF4A1	4
EIF4E	4
EIF4G2	4
EIF5	4
ELK1	4
ELL2	4
ELOVL5	4
ELOVL6	4
ENTPD5	4
EPC2	4
EPHA2	4
ERH	4
ERLEC1	4
ERO1A	4
ERO1B	4
ETF1	4
ETNK1	4
ETV3	4
EVI5	4
EXOC5	4
EXOC8	4
FABP5	4
FAF1	4
FAM120A	4
FAM120C	4
FAM133B	4
FAM13A	4
FAM149A	4
FAM172A	4
FAM241A	4
FAM76A	4
FBXL17	4
FBXO11	4
FBXO38	4
FBXO48	4
FEM1B	4
FHIP1A	4
FKBP4	4
FMO5	4
FNIP2	4
FOXJ3	4
FOXK2	4
FOXN2	4
FOXO1	4
FRYL	4
FTSJ3	4
FUBP1	4
FXR1	4
FYTTD1	4
GABPA	4
GAPVD1	4
GCH1	4
GCLM	4
GFPT1	4
GGPS1	4
GHITM	4
GIGYF2	4
GIMAP6	4
GINM1	4
GK	4
GLOD5	4
GLUL	4
GMCL1	4
GMPS	4
GNG5	4
GNL3	4
GOLGA4	4
GOLGB1	4
GOLPH3L	4
GORASP2	4
GOSR1	4
GPBP1	4
GPBP1L1	4
GPC4	4
GPD2	4
GPHN	4
GPN3	4
GPR155	4
GRB14	4
GTF2A1	4
GTPBP4	4
HBP1	4
HBS1L	4
HEXIM1	4
HIGD1A	4
HINT3	4
HIPK3	4
HMGB1	4
HNMT	4
HNRNPF	4
HNRNPU	4
HNRNPUL1	4
HPRT1	4
HSD17B11	4
HSP90AA1	4
HSP90AB1	4
HSP90B1	4
HSPA13	4
HSPA4	4
HSPA5	4
HSPA8	4
HSPA9	4
HSPH1	4
HYOU1	4
IBTK	4
ICE2	4
IDE	4
IDS	4
IFIH1	4
IFRD1	4
IGFBP3	4
IK	4
IKZF5	4
IL1R1	4
IL6ST	4
INTS6	4
IP6K1	4
IPO7	4
IRF2BPL	4
IRS1	4
IST1	4
ITCH	4
ITGA1	4
ITGAV	4
ITM2B	4
ITSN2	4
IWS1	4
JAK2	4
JMY	4
KAT6A	4
KCNJ3	4
KCNK1	4
KCTD20	4
KDELR2	4
KDM5A	4
KDM5C	4
KDM6A	4
KDM7A	4
KHDC4	4
KIAA2026	4
KLF12	4
KLF15	4
KLF9	4
KLHL11	4
KLHL15	4
KLHL24	4
KPNA1	4
KPNA3	4
LACTB2	4
LARP4	4
LARP4B	4
LBR	4
LEO1	4
LGR4	4
LIG1	4
LIMD1	4
LMBRD1	4
LMBRD2	4
LMTK2	4
LOC101537810	4
LOC101537845	4
LOC101538361	4
LOC101538583	4
LOC101538881	4
LOC101539216	4
LOC101539905	4
LOC101540874	4
LOC101541145	4
LOC101542330	4
LOC101542525	4
LOC101544097	4
LOC101545704	4
LOC101545812	4
LOC101546692	4
LOC101547126	4
LOC101548107	4
LOC101548154	4
LOC101548835	4
LOC101549253	4
LOC101549522	4
LOC101549664	4
LOC101550058	4
LOC101550305	4
LOC101550374	4
LOC101550735	4
LOC101550869	4
LOC101551431	4
LOC101551537	4
LOC101551542	4
LOC101551700	4
LOC101551916	4
LOC101552590	4
LOC101553008	4
LOC101553017	4
LOC101553667	4
LOC101553824	4
LOC101554265	4
LOC101554449	4
LOC101555380	4
LOC101556278	4
LOC101557255	4
LOC101557490	4
LOC101557547	4
LOC129399645	4
LOC129399659	4
LOC129399950	4
LOC129402055	4
LOC129402476	4
LOC129402558	4
LOC129403273	4
LOC129404266	4
LOC129405517	4
LOC129405518	4
LPIN2	4
LRIG2	4
LRP2	4
LRRC58	4
LRRFIP2	4
LTN1	4
LUC7L	4
LUC7L3	4
LURAP1L	4
LYSMD3	4
MAFF	4
MAGT1	4
MAN1A2	4
MAN2A1	4
MANF	4
MAOA	4
MAOB	4
MAP3K13	4
MAP3K2	4
MAP3K7	4
MAPK6	4
MAPKAPK5	4
MARCHF5	4
MAT2A	4
MATR3	4
MBNL1	4
MBNL2	4
MCFD2	4
MDM2	4
ME1	4
MED13	4
MED23	4
MED6	4
MET	4
METAP2	4
MEX3C	4
MFAP3	4
MFSD2A	4
MGAT4A	4
MIER1	4
MIER3	4
MIPOL1	4
MMGT1	4
MORF4L1	4
MORF4L2	4
MPZL2	4
MTDH	4
MTF1	4
MTMR4	4
MTREX	4
MTSS1	4
MTX3	4
MYNN	4
MYO6	4
N4BP1	4
N4BP2	4
N4BP2L2	4
NAA16	4
NAA25	4
NAALADL2	4
NACA	4
NAMPT	4
NAP1L1	4
NCK1	4
NCKAP1	4
NCL	4
NCOA3	4
NCOA7	4
NCOR1	4
NDEL1	4
NDFIP2	4
NFE2L2	4
NFX1	4
NFXL1	4
NIM1K	4
NIN	4
NIPBL	4
NOCT	4
NOTUM	4
NPM1	4
NR1D2	4
NRDC	4
NRIP1	4
NSD3	4
NSFL1C	4
NUDT11	4
NUDT12	4
NUDT21	4
NUFIP2	4
NUMA1	4
NUP58	4
NUP98	4
OGT	4
ORC4	4
OSGIN2	4
OTUD4	4
OTUD7B	4
P4HA2	4
PAK2	4
PALB2	4
PALS1	4
PALS2	4
PARD3	4
PARG	4
PARP9	4
PBK	4
PBRM1	4
PCF11	4
PCGF6	4
PCMTD1	4
PCNA	4
PCYT1A	4
PDCD10	4
PDHX	4
PDPR	4
PDZD8	4
PELI2	4
PER1	4
PHAX	4
PHC3	4
PHF20L1	4
PHF3	4
PHF8	4
PHIP	4
PICALM	4
PIK3CA	4
PKN2	4
PLAA	4
PLCB1	4
PLEKHF2	4
PLEKHG6	4
PNP	4
PNPLA8	4
POF1B	4
POLR2B	4
PON1	4
PON3	4
PPA1	4
PPARGC1A	4
PPFIA1	4
PPHLN1	4
PPID	4
PPP1CC	4
PPP1R15B	4
PPP2CA	4
PPP3CB	4
PPP4R1	4
PPP4R2	4
PPP4R3A	4
PPP4R3B	4
PPT1	4
PPTC7	4
PRPF38A	4
PRPF4B	4
PRPS2	4
PSD3	4
PSMA1	4
PSMA3	4
PSMA5	4
PSMB1	4
PSMB4	4
PSMC2	4
PSMC6	4
PSMD11	4
PSMD12	4
PSMD7	4
PSME4	4
PSPH	4
PTBP1	4
PTGER2	4
PTGES3	4
PTGFR	4
PTP4A1	4
PTPN2	4
PTPN4	4
PTPRC	4
PUM2	4
QKI	4
RAB11FIP2	4
RAB14	4
RAB18	4
RAB1A	4
RAB27B	4
RAB5A	4
RAB6A	4
RABGEF1	4
RAD21	4
RAI14	4
RALGAPB	4
RANBP9	4
RAP1A	4
RAP1B	4
RASA1	4
RB1	4
RB1CC1	4
RBL2	4
RBM14	4
RBM15	4
RBM22	4
RBM23	4
RBM27	4
RBM39	4
RBM47	4
RBM7	4
RCBTB1	4
RCHY1	4
RCL1	4
RCOR1	4
RELCH	4
RETREG1	4
RFXAP	4
RGN	4
RHOB	4
RHOT1	4
RIGI	4
RIOK3	4
RLF	4
RLIM	4
RMND5A	4
RNF103	4
RNF216	4
ROCK1	4
RPE	4
RPL24	4
RPL27A	4
RPL5	4
RPRD1B	4
RPS17	4
RPS6KA5	4
RPS7	4
RRP15	4
RSBN1	4
RSRP1	4
RTP4	4
RUBCNL	4
SACM1L	4
SALL1	4
SAMD8	4
SAR1A	4
SAT1	4
SBNO1	4
SCAF11	4
SCN7A	4
SCRN3	4
SDCBP	4
SEC22A	4
SEC23B	4
SEC24A	4
SEC24D	4
SEC63	4
SECISBP2L	4
SEL1L	4
SELENOF	4
SELENOI	4
SENP6	4
SERBP1	4
SERINC1	4
SERINC3	4
SESN2	4
SET	4
SETD7	4
SETDB2	4
SF1	4
SF3A3	4
SF3B1	4
SFPQ	4
SGMS2	4
SH3BGRL2	4
SHC1	4
SHLD3	4
SHOC2	4
SKIL	4
SLC17A2	4
SLC1A1	4
SLC23A1	4
SLC25A13	4
SLC25A25	4
SLC25A32	4
SLC25A51	4
SLC27A2	4
SLC2A2	4
SLC30A4	4
SLC30A5	4
SLC30A7	4
SLC35B1	4
SLC35F5	4
SLC39A6	4
SLC50A1	4
SLC7A2	4
SLC9A6	4
SLF2	4
SLMAP	4
SMAD4	4
SMARCA5	4
SMARCC1	4
SMC1A	4
SMC6	4
SMG1	4
SNAP23	4
SNRK	4
SNRPD3	4
SNTB1	4
SNX9	4
SON	4
SPART	4
SPCS2	4
SPEN	4
SPOP	4
SPRTN	4
SPTY2D1	4
SREK1	4
SRP54	4
SRP9	4
SRR	4
SRSF10	4
SS18	4
SSB	4
ST13	4
STAG1	4
STARD13	4
STAT1	4
STBD1	4
STIM2	4
STIP1	4
STK17B	4
STK3	4
STRAP	4
STRN3	4
STT3B	4
STX5	4
STXBP5	4
SUGT1	4
SUPT6H	4
SVIP	4
SYF2	4
SYNCRIP	4
TAF5L	4
TAOK1	4
TAOK3	4
TAP1	4
TARS1	4
TASOR	4
TAX1BP1	4
TBC1D23	4
TBK1	4
TBPL1	4
TCAIM	4
TCEA1	4
TCEA3	4
TCF12	4
TCP1	4
TEC	4
TENT2	4
TENT4B	4
TENT5A	4
TERF2IP	4
TEX2	4
THAP1	4
TIAL1	4
TJP1	4
TM2D2	4
TM9SF3	4
TMED10	4
TMED6	4
TMEM106B	4
TMEM131	4
TMEM170B	4
TMEM183A	4
TMEM199	4
TMEM33	4
TMEM38B	4
TMEM41B	4
TMEM63A	4
TMEM67	4
TMF1	4
TMOD3	4
TMT1A	4
TNKS2	4
TNPO1	4
TOB2	4
TOP1	4
TOP2B	4
TOPORS	4
TOX3	4
TRA2A	4
TRAK1	4
TRAK2	4
TRAPPC13	4
TRAPPC8	4
TRIM28	4
TRIM33	4
TSNAX	4
TSR1	4
TTBK2	4
TUT7	4
TVP23C	4
TXLNA	4
TXLNG	4
TXNDC15	4
TXNL1	4
UBA2	4
UBA3	4
UBA6	4
UBE2B	4
UBE2G1	4
UBE2H	4
UBE2J1	4
UBE2Q1	4
UBE2W	4
UBE4B	4
UBL3	4
UBQLN1	4
UBR2	4
UBR3	4
UBXN4	4
UCP2	4
UFD1	4
UFL1	4
UGP2	4
USO1	4
USP1	4
USP14	4
USP15	4
USP3	4
USP32	4
USP34	4
USP38	4
USP47	4
USP9X	4
VAMP2	4
VAMP7	4
VCP	4
VCPIP1	4
VMP1	4
VPS29	4
VPS35	4
VPS37A	4
VPS54	4
WAPL	4
WASL	4
WDR43	4
WDR45B	4
WDR75	4
WTAP	4
XPO5	4
XRN2	4
YAP1	4
YPEL5	4
YTHDC1	4
YTHDF3	4
YWHAG	4
YY1	4
ZBTB11	4
ZBTB16	4
ZBTB44	4
ZBTB6	4
ZC3H14	4
ZC3H15	4
ZCCHC2	4
ZDHHC17	4
ZFX	4
ZMPSTE24	4
ZMYM2	4
ZNF131	4
ZNF143	4
ZNF146	4
ZNF280C	4
ZNF292	4
ZNF638	4
ZNF639	4
ZNF644	4
ZNF654	4
ZNF655	4
ZNF770	4

## Sheet: Cluster Pathways
Cluster	KEGG Term	Count	%	PValue	Genes	List Total	Pop Hits	Pop Total	Fold Enrichment	Bonferroni	Benjamini	FDR
4	hsa04141:Protein processing in endoplasmic reticulum	37	4.474	4.03601e-14	ERO1A, ERO1B, VCP, HSP90AB1, SAR1A, SEL1L, MAGT1, UBE2J1, HSP90B1, DNAJB1, ERLEC1, HSPH1, MAN1A2, UBQLN1, UFD1, UBXN4, SEC23B, SEC63, HSPA8, HSP90AA1, SEC24A, HSPA5, DNAJB12, EIF2AK3, UBE2G1, UBE4B, SVIP, DNAJA1, DNAJC3, NSFL1C, DNAJB11, DNAJA2, PLAA, HYOU1, STT3B, SEC24D, NFE2L2	420	170	8534	4.42238	1.2649e-11	1.26327e-11	1.26327e-11
4	hsa03050:Proteasome	11	1.33011	6.06277e-05	PSMA5, PSMA3, PSMD12, PSMB4, PSMD7, PSMD11, PSMC6, PSMA1, PSMC2, PSMB1, PSME4	420	46	8534	4.8589	0.0187981	0.00948824	0.00948824
4	hsa04137:Mitophagy - animal	13	1.57195	0.0051988	BNIP3L, USP15, VCP, MTX3, EIF2AK3, BCL2L13, RABGEF1, TBK1, RHOT1, TAX1BP1, ARIH1, RAB5A, MARCHF5	420	105	8534	2.51569	0.804358	0.478777	0.478777
4	hsa03013:Nucleocytoplasmic transport	13	1.57195	0.00651109	AHCTF1, CSE1L, PHAX, CASC3, IPO7, EEF1A1, TMEM33, XPO5, NUP98, TNPO1, KPNA3, NUP58, KPNA1	420	108	8534	2.44581	0.870572	0.478777	0.478777
4	hsa04120:Ubiquitin mediated proteolysis	15	1.81378	0.00980771	UBE2H, CUL5, UBE2B, UBA6, CUL3, UBE4B, UBE2G1, RCHY1, UBE2J1, UBE2W, ITCH, UBE2Q1, MDM2, UBA3, UBA2	420	142	8534	2.14638	0.954268	0.478777	0.478777
4	hsa05017:Spinocerebellar ataxia	15	1.81378	0.0110242	PSMD12, PSMD11, PUM2, PSMA5, PSMA3, PSMB4, PSMC6, PSMD7, PIK3CA, PSMA1, RB1CC1, PSMC2, PSMB1, TBPL1, PLCB1	420	144	8534	2.11657	0.968875	0.478777	0.478777
4	hsa05132:Salmonella infection	22	2.66022	0.0117004	ACTR3, NCKAP1, DYNC1I2, CYFIP1, HSP90AA1, HSP90AB1, CSE1L, WASL, RHOB, HSP90B1, PTPRC, PIK3CA, ARPC2, MYO6, ABI1, CTNNB1, SNX9, EXOC5, MAP3K7, RAB5A, KPNA3, KPNA1	420	251	8534	1.78095	0.974873	0.478777	0.478777
4	hsa05100:Bacterial invasion of epithelial cells	10	1.20919	0.0137668	ACTR3, PIK3CA, ARPC2, SHC1, CLTC, CTNNB1, WASL, CRK, MET, CD2AP	420	78	8534	2.60501	0.98695	0.478777	0.478777
4	hsa03018:RNA degradation	10	1.20919	0.0137668	HSPA9, DDX6, CNOT7, CNOT6L, CNOT1, XRN2, DHX36, MTREX, TOB2, TENT4B	420	78	8534	2.60501	0.98695	0.478777	0.478777
4	hsa04520:Adherens junction	11	1.33011	0.0154731	RAP1B, TJP1, SMAD4, RAP1A, ROCK1, PDCD10, PARD3, CTNNB1, WASL, MAP3K7, MET	420	93	8534	2.40333	0.99241	0.484307	0.484307
4	hsa05130:Pathogenic Escherichia coli infection	18	2.17654	0.0217863	ACTR3, NCKAP1, RAB1A, CYFIP1, SEC24A, TMED10, ROCK1, IL1R1, WASL, TJP1, ARPC2, NCL, MYO6, ABI1, SEC24D, MAP3K7, PAK2, NCK1	420	203	8534	1.80169	0.998987	0.603684	0.603684
4	hsa04110:Cell cycle	15	1.81378	0.0231444	RB1, SMAD4, PCNA, ATRX, SMC1A, WAPL, PPP2CA, RBL2, ORC4, STAG1, NIPBL, RAD21, MDM2, ATM, YWHAG	420	158	8534	1.92902	0.999344	0.603684	0.603684
4	hsa03082:ATP-dependent chromatin remodeling	12	1.45103	0.0283828	YY1, MORF4L1, SS18, SMARCC1, PBRM1, MORF4L2, SMARCA5, EPC2, ACTR8, BAZ1A, BAZ2B, BAZ1B	420	117	8534	2.084	0.999878	0.657446	0.657446
4	hsa03015:mRNA surveillance pathway	11	1.33011	0.0294065	PPP2CA, NUDT21, PPP1CC, HBS1L, SMG1, PCF11, CLP1, CSTF3, CSTF2, ETF1, CASC3	420	103	8534	2.17	0.999912	0.657446	0.657446
4	hsa04140:Autophagy - animal	15	1.81378	0.0381464	RAB1A, WDR45B, IRS1, EIF2AK3, HMGB1, MTMR4, ATG12, VMP1, PPP2CA, TBK1, PIK3CA, GORASP2, RB1CC1, TAX1BP1, MAP3K7	420	169	8534	1.80347	0.999995	0.795987	0.795987
4	hsa05134:Legionellosis	7	0.846433	0.0554453	EEF1A1, HSPA8, RAB1A, BCL2L13, HBS1L, VCP, SAR1A	420	56	8534	2.53988	1	1	1
4	hsa03060:Protein export	5	0.604595	0.0632781	SPCS2, HSPA5, SRP54, SRP9, SEC63	420	31	8534	3.27727	1	1	1
4	hsa05417:Lipid and atherosclerosis	17	2.05562	0.0654989	ERO1A, HSPA8, HSP90AA1, HSP90AB1, HSPA5, HSPA4, EIF2AK3, HSP90B1, RAP1B, PPP3CB, RAP1A, TBK1, PIK3CA, PLCB1, JAK2, MAP3K7, NFE2L2	420	216	8534	1.59918	1	1	1
4	hsa04144:Endocytosis	19	2.29746	0.0695145	ARFGEF1, ACTR3, HSPA8, VPS29, IST1, CLTC, VPS37A, WASL, SPART, EEA1, ITCH, ARPC2, PARD3, PSD3, MDM2, VPS35, RAB11FIP2, RAB5A, CHMP5	420	252	8534	1.53199	1	1	1
4	hsa04211:Longevity regulating pathway	9	1.08827	0.0738717	ATF2, PIK3CA, IRS1, RB1CC1, SESN2, EIF4E, PPARGC1A, FOXO1, APPL1	420	90	8534	2.0319	1	1	1
4	hsa04130:SNARE interactions in vesicular transport	5	0.604595	0.0763166	VAMP7, SNAP23, GOSR1, STX5, VAMP2	420	33	8534	3.07864	1	1	1
4	hsa05163:Human cytomegalovirus infection	17	2.05562	0.0896497	RB1, ATF2, ROCK1, IL1R1, PTGER2, TAP1, ELK1, AKAP13, PPP3CB, TBK1, GNG5, PIK3CA, MDM2, CTNNB1, ITGAV, PLCB1, CRK	420	226	8534	1.52842	1	1	1
4	hsa00340:Histidine metabolism	4	0.483676	0.0906828	ALDH3A2, MAOB, MAOA, HNMT	420	22	8534	3.69437	1	1	1
3	hsa00532:Glycosaminoglycan biosynthesis - chondroitin sulfate / dermatan sulfate	4	1.3986	0.00367762	CHPF, XYLT2, XYLT1, B4GALT7	130	21	8534	12.504	0.561899	0.755052	0.755052
3	hsa04721:Synaptic vesicle cycle	6	2.0979	0.00674154	RAB3A, STXBP1, SLC6A11, SLC6A1, ATP6V0E2, CPLX1	130	79	8534	4.98578	0.78024	0.755052	0.755052
3	hsa04020:Calcium signaling pathway	9	3.14685	0.0384353	PLCB3, TFEB, PPIF, VEGFB, ATP2B3, CALM3, CACNA1H, TPCN2, FGFR1	130	254	8534	2.32604	0.999846	1	1
3	hsa04727:GABAergic synapse	5	1.74825	0.0455099	SLC12A5, GNG7, SLC6A11, SLC6A1, GABRG2	130	89	8534	3.68799	0.999971	1	1
3	hsa00534:Glycosaminoglycan biosynthesis - heparan sulfate / heparin	3	1.04895	0.0503917	XYLT2, XYLT1, B4GALT7	130	24	8534	8.20577	0.999991	1	1
3	hsa04713:Circadian entrainment	5	1.74825	0.0589976	PLCB3, ADCYAP1R1, GNG7, CALM3, CACNA1H	130	97	8534	3.38382	0.999999	1	1
3	hsa04371:Apelin signaling pathway	6	2.0979	0.0607403	LIPE, PLCB3, MAP1LC3A, GNG7, CALM3, PRKAG3	130	140	8534	2.81341	0.999999	1	1
3	hsa04925:Aldosterone synthesis and secretion	5	1.74825	0.0608185	LIPE, PLCB3, ATP2B3, CALM3, CACNA1H	130	98	8534	3.34929	0.999999	1	1
3	hsa01100:Metabolic pathways	32	11.1888	0.0640268	ISYNA1, CHPF, MOGAT3, IDUA, XYLT2, LPCAT1, XYLT1, AGPAT2, PGS1, NAGLU, HSD17B1, PDE6C, CKB, ATP6V0E2, GYG1, PGM1, PTGIS, MDH2, SMOX, SIRT4, AMPD2, SIRT7, CAMKMT, UCKL1, PLCB3, PHOSPHO1, PKM, GNPDA1, IMPDH1, SCD, B4GALT7, MGLL	130	1570	8534	1.33801	1	1	1
3	hsa00564:Glycerophospholipid metabolism	5	1.74825	0.0703656	PGS1, PHOSPHO1, LPCAT1, PNPLA6, AGPAT2	130	103	8534	3.18671	1	1	1
3	hsa04137:Mitophagy - animal	5	1.74825	0.0743883	MAP1LC3A, CITED2, TFE3, TFEB, TOMM40L	130	105	8534	3.12601	1	1	1
2	hsa00900:Terpenoid backbone biosynthesis	3	2.43902	0.0134231	FDPS, IDI1, HMGCR	67	23	8534	16.6139	0.815341	1	1
2	hsa00230:Purine metabolism	4	3.25203	0.0763381	RRM2, PPAT, PAICS, PAPSS2	67	128	8534	3.98041	0.999951	1	1
2	hsa00140:Steroid hormone biosynthesis	3	2.43902	0.0851764	SRD5A2, HSD17B2, HSD17B7	67	63	8534	6.06539	0.999985	1	1
1	hsa04820:Cytoskeleton in muscle cells	36	6.79245	2.63379e-14	SPTBN4, MYOM1, SYNPO2, ATP1A3, LDB3, ATP1A2, ENO2, MYOM2, LMOD2, TTN, CSRP3, PDLIM2, ANKRD1, XIRP2, DMD, TNNI3, MYOZ2, TMOD1, MYBPC3, TRIM63, TPM4, JUP, ACTN2, TNNC1, ANK3, FMNL3, OBSCN, ACTC1, MYL2, TNNT2, MYL3, TCAP, SDC1, COL9A3, TLN2, TRIM54	284	232	8534	4.66282	7.7095e-12	7.71702e-12	7.58533e-12
1	hsa04260:Cardiac muscle contraction	15	2.83019	8.66457e-07	RYR2, TPM4, TNNC1, CACNA2D2, ATP1A3, ATP1A2, CACNA1C, CACNB1, ACTC1, TNNT2, MYL2, MYL3, HRC, CASQ2, TNNI3	284	87	8534	5.18091	0.00025384	0.000126936	0.00012477
1	hsa05414:Dilated cardiomyopathy	16	3.01887	1.68863e-06	MYBPC3, RYR2, TPM4, TNNC1, CACNA2D2, ADCY2, CACNA1C, TTN, CACNB1, ACTC1, PLN, TNNT2, MYL2, MYL3, TNNI3, DMD	284	105	8534	4.57894	0.000494648	0.000164923	0.000162109
1	hsa04261:Adrenergic signaling in cardiomyocytes	19	3.58491	3.0946e-06	RYR2, TPM4, TNNC1, ATP2B4, CACNA2D2, ATP1A3, ADCY2, ATP1A2, CACNA1C, CACNB1, ACTC1, PLN, TNNT2, KCNQ1, MYL2, MYL3, TNNI3, CALM1, SCN4B	284	154	8534	3.70738	0.000906307	0.000226679	0.000222811
1	hsa05410:Hypertrophic cardiomyopathy	15	2.83019	4.25759e-06	MYBPC3, RYR2, PRKAB2, TPM4, TNNC1, CACNA2D2, CACNA1C, TTN, CACNB1, ACTC1, TNNT2, MYL2, MYL3, TNNI3, DMD	284	99	8534	4.55292	0.0012467	0.000249495	0.000245237
1	hsa04020:Calcium signaling pathway	22	4.15094	0.000102346	RYR2, EGF, TNNC1, PTGER3, CACNA1B, ATP2B4, ADCY2, CACNA1C, MYLK3, MYLK4, P2RX6, PLN, PHKG1, HRC, CASQ2, ORAI1, CALM1, FGFR4, SLC25A4, PLCD4, PLCD1, MCU	284	254	8534	2.60269	0.0295437	0.0049979	0.00491261
1	hsa01100:Metabolic pathways	78	14.717	0.000134796	DGKG, PYGB, GAL3ST1, ACAA2, ADPGK, ACSM1, AMD1, QPRT, ABAT, OGDHL, PYGM, NADSYN1, COMT, ENO2, LCLAT1, HK2, NMRK2, RFK, NAPRT, TK1, PTGDS, LARGE2, CA14, MCCC2, ACSL6, AMT, SIRT5, CMBL, DGKZ, NT5C3B, NDUFS7, TST, RDH5, ACSBG1, HPD, ST6GALNAC6, CDS1, GALT, ECHS1, GLO1, AK1, ATP5MC3, GMPR, NDUFB1, ADCY2, ADH7, PLA2G6, PLA2G7, CKMT2, LDHB, NFS1, OXCT1, FUT9, CBS, CARNS1, GCNT2, PCBD1, PDE6A, ST3GAL1, …	284	1570	8534	1.49289	0.038728	0.00564218	0.00554589
1	hsa04371:Apelin signaling pathway	12	2.26415	0.00673409	MEF2A, RYR2, PRKAB2, MAP1LC3B, CCND1, MYL2, MYL3, GNB3, ADCY2, CALM1, MYLK3, MYLK4	284	140	8534	2.57565	0.861898	0.246636	0.242427
1	hsa04922:Glucagon signaling pathway	10	1.88679	0.00895918	LDHB, PYGB, PRKAB2, PHKG1, ADCY2, PYGM, CALM1, PPARA, CPT1B, PFKP	284	107	8534	2.80835	0.928415	0.254732	0.250385
1	hsa04022:cGMP-PKG signaling pathway	13	2.45283	0.00908024	MEF2A, ATP2B4, ATP1A3, ADCY2, ATP1A2, CACNA1C, MYLK3, MYLK4, NPPB, PLN, NPPA, CALM1, SLC25A4	284	166	8534	2.35326	0.930932	0.254732	0.250385
1	hsa00650:Butanoate metabolism	5	0.943396	0.0113811	ECHS1, OXCT1, ACSM1, GAD2, ABAT	284	27	8534	5.56468	0.965048	0.254732	0.250385
1	hsa03320:PPAR signaling pathway	8	1.50943	0.0127137	FABP1, FABP3, ACSL6, SLC27A6, ACSBG1, PPARA, RXRG, CPT1B	284	76	8534	3.16308	0.976459	0.254732	0.250385
1	hsa04971:Gastric acid secretion	8	1.50943	0.0127137	KCNJ10, KCNQ1, ATP1A3, ADCY2, ATP1A2, CALM1, MYLK3, MYLK4	284	76	8534	3.16308	0.976459	0.254732	0.250385
1	hsa00071:Fatty acid degradation	6	1.13208	0.0132951	ACAA2, ECHS1, ACSL6, ACSBG1, ADH7, CPT1B	284	43	8534	4.19292	0.980191	0.254732	0.250385
1	hsa04270:Vascular smooth muscle contraction	11	2.07547	0.0134636	NPPB, ADM2, NPPA, ADCY2, CACNA1C, CALM1, PPP1R12B, PLA2G6, RAMP1, MYLK3, MYLK4	284	134	8534	2.46673	0.981158	0.254732	0.250385
1	hsa04921:Oxytocin signaling pathway	12	2.26415	0.0139103	CACNB1, RYR2, PRKAB2, CCND1, NPPA, CACNA2D2, ADCY2, CACNA1C, CALM1, PPP1R12B, MYLK3, MYLK4	284	155	8534	2.3264	0.983499	0.254732	0.250385
1	hsa04925:Aldosterone synthesis and secretion	9	1.69811	0.0158438	SCARB1, NPPA, ATP2B4, ORAI1, ATP1A3, ADCY2, ATP1A2, CACNA1C, CALM1	284	98	8534	2.75963	0.990715	0.273073	0.268413
1	hsa00564:Glycerophospholipid metabolism	9	1.69811	0.0208012	CDS1, DGKG, PLPP5, TAFAZZIN, ETNK2, PLA2G6, LCLAT1, DGKZ, ETNPPL	284	103	8534	2.62567	0.997886	0.338597	0.332819
1	hsa04920:Adipocytokine signaling pathway	7	1.32075	0.0280916	PRKAB2, ACSL6, ACSBG1, SLC2A4, PPARA, RXRG, CPT1B	284	70	8534	3.00493	0.999763	0.433202	0.42581
1	hsa04814:Motor proteins	13	2.45283	0.0307661	TPM4, TNNC1, KLC2, ACTC1, TNNT2, MYL2, MYO3A, KIF5A, MYL3, MYO18B, TNNI3, KIF21A, KIF3C	284	197	8534	1.98295	0.999894	0.450724	0.443033
1	hsa00760:Nicotinate and nicotinamide metabolism	5	0.943396	0.0360918	NMRK2, NAPRT, QPRT, SIRT5, NADSYN1	284	38	8534	3.95385	0.999979	0.499887	0.491356
1	hsa04024:cAMP signaling pathway	14	2.64151	0.0375342	RYR2, PTGER3, ATP2B4, ATP1A3, ADCY2, ATP1A2, CACNA1C, PLN, FXYD1, NPPA, ORAI1, TNNI3, CALM1, PPARA	284	226	8534	1.86146	0.999986	0.499887	0.491356
1	hsa05415:Diabetic cardiomyopathy	13	2.45283	0.0399433	RYR2, NDUFB1, ATP5MC3, SLC2A4, CPT1B, PTPA, PLN, NDUFS7, TNNI3, REN, PPARA, SLC25A4, PDK2	284	205	8534	1.90557	0.999993	0.508843	0.50016
1	hsa04721:Synaptic vesicle cycle	7	1.32075	0.0466978	STX1B, UNC13A, SYT1, CACNA1B, SLC6A12, CPLX2, DNM1	284	79	8534	2.6626	0.999999	0.570102	0.560373
1	hsa04919:Thyroid hormone signaling pathway	9	1.69811	0.0495695	PLN, CCND1, MED30, ATP1A3, ATP1A2, RXRG, PLCD4, PLCD1, PFKP	284	122	8534	2.21675	1	0.580955	0.571041
1	hsa05412:Arrhythmogenic right ventricular cardiomyopathy	7	1.32075	0.0654573	CACNB1, RYR2, JUP, ACTN2, CACNA2D2, DMD, CACNA1C	284	86	8534	2.44587	1	0.705771	0.693727
1	hsa04930:Type II diabetes mellitus	5	0.943396	0.0694304	ABCC8, CACNA1B, SLC2A4, CACNA1C, HK2	284	47	8534	3.19673	1	0.705771	0.693727
1	hsa04931:Insulin resistance	8	1.50943	0.0698596	PTPA, PYGB, PRKAB2, SLC27A6, PYGM, SLC2A4, PPARA, CPT1B	284	109	8534	2.20545	1	0.705771	0.693727
1	hsa00010:Glycolysis / Gluconeogenesis	6	1.13208	0.0707934	LDHB, ADPGK, ADH7, ENO2, HK2, PFKP	284	67	8534	2.69098	1	0.705771	0.693727
1	hsa00280:Valine, leucine and isoleucine degradation	5	0.943396	0.0738605	MCCC2, ACAA2, ECHS1, OXCT1, ABAT	284	48	8534	3.13013	1	0.705771	0.693727
1	hsa04727:GABAergic synapse	7	1.32075	0.074672	CACNA1B, GNB3, SLC6A12, GAD2, ABAT, ADCY2, CACNA1C	284	89	8534	2.36343	1	0.705771	0.693727
1	hsa00410:beta-Alanine metabolism	4	0.754717	0.0820404	ECHS1, CARNS1, GAD2, ABAT	284	31	8534	3.87733	1	0.73817	0.725573
1	hsa00330:Arginine and proline metabolism	5	0.943396	0.0831386	CKMT2, CARNS1, AMD1, PYCR1, AGMAT	284	50	8534	3.00493	1	0.73817	0.725573
1	hsa00604:Glycosphingolipid biosynthesis - ganglio series	3	0.566038	0.0866424	B3GALT4, ST3GAL1, ST6GALNAC6	284	15	8534	6.00986	1	0.746653	0.733912
