# Supplementary material for: Dynamic metabolic and molecular changes during seasonal shrinking in Sorex araneus
Source: HighWire-hosted journal article supplement (doi:10.1101/gr.280639.125), 2025-11-04
Supplement: Supplemental_Data.zip [file Supplemental_Data_S7.xlsx]

## Sheet: Pathway Enrichment
Count	Pathway	pval	padj	log2err	Enrichment Score	Normalized Enrichment Score	Gene List Size	Gene List
1	KEGG_PROXIMAL_TUBULE_BICARBONATE_RECLAMATION	0.000162123	0.0100516	0.518848	0.788397	2.00713	14	c("PCK1", "ATP1B2", "CA2", "GLS2", "ATP1B1", "SLC25A10", "PCK2", "ATP1A1", "FXYD2", "SLC38A3")
2	KEGG_CIRCADIAN_RHYTHM_MAMMAL	0.000544322	0.025311	0.477271	0.843444	1.92402	9	c("PER1", "PER2", "CRY2", "BHLHE40", "NR1D1")
3	KEGG_GLYCINE_SERINE_AND_THREONINE_METABOLISM	0.00495026	0.124805	0.407018	0.585721	1.73795	28	c("SDS", "PSPH", "ALAS2", "PHGDH", "ALAS1", "MAOB", "SHMT1", "CBS", "GAMT")
4	KEGG_MAPK_SIGNALING_PATHWAY	0.000133412	0.0100516	0.518848	0.408798	1.70512	166	c("NR4A1", "DUSP1", "DUSP10", "MYC", "DUSP4", "DUSP8", "DUSP3", "JUN", "MAP2K6", "GADD45A", "IL1R2", "GADD45G", "CD14", "PDGFRA", "FGFR1", "EGFR", "FGF21", "MAPK8IP1", "JUND", "TRAF6", "DUSP5", "GADD45B", "PPP3CC", "NTRK1", "PLA2G6", "MAP3K6", "RRAS", "MAP3K8", "PDGFB", "HSPA2", "MAPK8IP3", "PPP3CA", "PDGFRB", "CACNG5")
5	KEGG_BASAL_CELL_CARCINOMA	0.00536795	0.124805	0.407018	0.578845	1.68554	26	c("WNT10B", "WNT1", "PTCH1", "FZD5", "FZD4", "BMP2", "FZD8", "WNT2", "PTCH2", "WNT9B", "FZD7")
6	KEGG_CARDIAC_MUSCLE_CONTRACTION	0.00659283	0.136252	0.407018	0.573824	1.67092	26	c("ATP1B2", "ATP1B1", "TPM2", "CACNG5", "COX6B1", "ATP1A1", "FXYD2", "COX4I1", "CYC1", "COX5A", "UQCR11", "CACNA2D2", "UQCRFS1", "UQCRC1")
7	KEGG_OTHER_GLYCAN_DEGRADATION	0.0199778	0.167427	0.352488	0.698131	1.66588	11	c("HEXA", "FUCA2", "MAN2C1", "GLB1", "NEU1", "AGA", "HEXB", "NEU3")
8	KEGG_PYRUVATE_METABOLISM	0.0173309	0.167427	0.352488	0.538309	1.59727	28	c("PCK1", "ME1", "PKLR", "AKR1B1", "PC", "ALDH1B1", "PCK2", "MDH2")
9	KEGG_ARGININE_AND_PROLINE_METABOLISM	0.0149889	0.154885	0.38073	0.489359	1.58596	41	c("ASS1", "OAT", "PYCR2", "GLS2", "P4HA2", "GOT1", "ALDH1B1", "ARG1", "CPS1", "MAOB", "ACY1", "ASL", "GOT2", "GAMT", "PRODH")
10	KEGG_OXIDATIVE_PHOSPHORYLATION	0.00840188	0.153282	0.38073	0.445271	1.58489	65	c("ATP5F1A", "COX10", "ATP6V0A1", "LHPP", "NDUFV3", "COX6B1", "COX4I1", "ATP6V1B2", "CYC1", "COX5A", "UQCR11", "NDUFB7", "NDUFB9", "NDUFS7", "SDHB", "NDUFV2", "UQCRFS1", "ATP6AP1", "NDUFS8", "UQCRC1", "NDUFS1", "PPA1", "NDUFA8", "NDUFS3", "NDUFA9", "SDHC", "ATP6V1D", "NDUFB6", "NDUFB8", "ATP6V1H", "COX7A2", "ATP6V0E1", "SDHA", "ATP6V0D1")
11	KEGG_DNA_REPLICATION	0.0216035	0.167427	0.352488	0.507807	1.53214	30	c("MCM5", "MCM6", "MCM2", "FEN1", "RPA2", "LIG1", "MCM7", "RNASEH1", "POLD2", "MCM3", "DNA2", "POLD3", "RPA1", "POLD1", "RNASEH2C", "RFC3", "POLA1")
12	KEGG_CELL_CYCLE	0.0120536	0.154709	0.38073	0.403612	1.50707	86	c("MYC", "DBF4", "GADD45A", "CDKN1A", "GADD45G", "WEE1", "MCM5", "ORC1", "MCM6", "MCM2", "GADD45B", "PKMYT1", "MAD2L1", "E2F2", "ANAPC1", "CCND3", "MCM7", "E2F5", "PTTG1", "ORC6", "CDK7", "MCM3", "SMC3", "CDKN2C", "ZBTB17", "ABL1", "E2F3", "CCNH", "MAD1L1", "CDKN2D")
13	KEGG_ADIPOCYTOKINE_SIGNALING_PATHWAY	0.0212719	0.167427	0.352488	0.442125	1.49106	49	c("IRS2", "PPARGC1A", "PCK1", "SLC2A1", "CPT1A", "ACSL3", "ADIPOR1", "NFKBIA", "PRKAB2", "PCK2", "ACSL1", "NFKBIB", "ADIPOR2", "PPARA")
14	KEGG_PATHOGENIC_ESCHERICHIA_COLI_INFECTION	0.0448401	0.26504	0.321776	0.481905	1.48356	32	c("TUBB1", "CD14", "TUBB2A", "NCK2", "TUBB6", "WASL")
15	KEGG_WNT_SIGNALING_PATHWAY	0.0196184	0.167427	0.352488	0.386077	1.46111	92	c("MYC", "JUN", "WNT10B", "WNT1", "VANGL1", "FZD5", "FZD4", "CTNNBIP1", "WIF1", "FZD8", "PLCB1", "PPP3CC", "SIAH1", "WNT2", "PSEN1", "LRP5", "CCND3", "WNT9B", "PPP3CA")
16	KEGG_PENTOSE_PHOSPHATE_PATHWAY	0.0579151	0.299228	0.261664	0.527119	1.44637	20	c("PFKM", "GPI", "PFKL", "TALDO1", "TKT", "ALDOA", "FBP1", "ALDOB")
17	KEGG_GLYCOSPHINGOLIPID_BIOSYNTHESIS_GLOBO_SERIES	0.0850202	0.33826	0.21925	0.708406	1.44383	6	c("A4GALT", "HEXA", "GBGT1", "GLA")
18	KEGG_BLADDER_CANCER	0.0682261	0.325386	0.24134	0.465444	1.43288	32	c("MYC", "CDKN1A", "EGFR", "RASSF1", "E2F2", "THBS1", "KRAS", "MMP2")
19	KEGG_NITROGEN_METABOLISM	0.0945674	0.33826	0.206588	0.574134	1.43261	13	c("CA2", "GLS2", "HAL", "CPS1", "CA8")
20	KEGG_CITRATE_CYCLE_TCA_CYCLE	0.0632184	0.317801	0.248911	0.494987	1.4293	25	c("PCK1", "PC", "IDH2", "ACO2", "OGDH", "ACO1", "PCK2", "MDH2")
21	KEGG_ALANINE_ASPARTATE_AND_GLUTAMATE_METABOLISM	0.0721063	0.335294	0.231127	0.492525	1.41545	24	c("ASS1", "GPT2", "GLS2", "GOT1", "CPS1", "GPT", "PPAT", "ASL", "GOT2")
22	KEGG_LYSOSOME	0.0305259	0.21029	0.352488	0.369784	1.4034	96	c("HEXA", "GNPTAB", "GNPTG", "CTSZ", "ARSG", "CTSB", "GAA", "AP3M2", "PSAP", "ARSA", "NPC1", "CTSD", "ACP5", "ATP6V0A1", "CTSF", "NAGPA", "LIPA", "PPT2", "GALC", "GM2A", "SCARB2", "MCOLN1", "NAGLU", "GNS", "NPC2", "GLA", "SLC17A5", "DNASE2", "GLB1", "CTSA", "LGMN", "SMPD1", "NEU1", "AGA", "HEXB", "ATP6AP1", "M6PR", "GUSB", "AP1M1", "CTSV", "GGA2", "AP3B1", "DNASE2B", "SGSH", "LAPTM4A", "LAMP2", "…
23	KEGG_ALDOSTERONE_REGULATED_SODIUM_REABSORPTION	0.0777989	0.33826	0.222056	0.486477	1.39807	24	c("SCNN1B", "IRS2", "ATP1B2", "ATP1B1", "NR3C2", "SLC9A3R2", "ATP1A1", "KRAS", "FXYD2")
24	KEGG_ERBB_SIGNALING_PATHWAY	0.0543071	0.289668	0.266351	0.398885	1.38362	57	c("NRG4", "MYC", "JUN", "CDKN1A", "EGFR", "NCK2", "HBEGF", "PLCG1", "GAB1", "EIF4EBP1")
25	KEGG_FRUCTOSE_AND_MANNOSE_METABOLISM	0.0874525	0.33826	0.208955	0.485067	1.38045	23	c("PFKFB3", "PFKM", "AKR1B1", "PFKL", "ALDOA", "FBP1", "ALDOB", "SORD", "KHK", "PFKFB1", "PMM1")
26	KEGG_PATHWAYS_IN_CANCER	0.0243252	0.18098	0.352488	0.321691	1.3702	205	c("MYC", "ZBTB16", "JUN", "WNT10B", "CDKN1A", "WNT1", "SLC2A1", "PTCH1", "LAMA2", "FZD5", "PDGFRA", "LAMB2", "FGFR1", "FZD4", "EGFR", "FGF21", "NFKBIA", "TRAF6", "BMP2", "NCOA4", "FOXO1", "FZD8", "LAMA5", "RASSF1", "LAMC1", "WNT2", "NTRK1", "PTCH2", "HSP90AB1", "E2F2", "JUP", "PDGFB", "MITF", "PLCG1", "EPAS1", "WNT9B", "ITGA3", "ITGA2B", "ITGA6", "PDGFRB")
27	KEGG_ABC_TRANSPORTERS	0.0923379	0.33826	0.206588	0.449627	1.3566	30	c("CFTR", "ABCG5", "ABCG8", "ABCD3", "ABCA4", "ABCC1", "ABCG1", "ABCB4", "ABCA1", "ABCA3", "ABCG2", "ABCA5")
28	KEGG_FATTY_ACID_METABOLISM	0.0912698	0.33826	0.208955	0.450023	1.34649	29	c("CPT1A", "ACSL3", "ALDH1B1", "ACSL1", "ACOX1", "ACADVL", "EHHADH", "ACSL5", "HADHB", "ECI1")
29	KEGG_GAP_JUNCTION	0.082397	0.33826	0.213928	0.383501	1.33026	57	c("TUBB1", "TUBB2A", "PDGFRA", "EGFR", "TUBB6", "PLCB1", "ADCY8", "LPAR1", "PDGFB", "PDGFRB", "GNA11", "ADCY1", "ITPR3", "KRAS")
30	KEGG_TASTE_TRANSDUCTION	0.176113	0.517582	0.148262	0.524333	1.27538	12	c("SCNN1B", "ADCY8", "ITPR3")
31	KEGG_RETINOL_METABOLISM	0.182342	0.517582	0.141225	0.473756	1.2705	18	c("CYP26B1", "CYP26A1", "LRAT", "BCO1", "RETSAT", "CYP1A2", "UGT1A1", "DHRS4")
32	KEGG_HYPERTROPHIC_CARDIOMYOPATHY_HCM	0.142857	0.450363	0.160801	0.391802	1.26251	38	c("LAMA2", "DES", "ITGA7", "ITGA10", "TPM2", "ACE", "PRKAB2", "SGCB", "ITGA3", "ITGA2B", "ITGA6", "CACNG5")
33	KEGG_MISMATCH_REPAIR	0.21135	0.529942	0.131458	0.475587	1.23826	15	c("RPA2", "LIG1", "POLD2", "POLD3", "RPA1", "POLD1", "RFC3", "MSH2", "RPA3")
34	KEGG_MELANOGENESIS	0.146893	0.455367	0.157403	0.352524	1.23545	60	c("WNT10B", "WNT1", "FZD5", "EDNRB", "FZD4", "FZD8", "PLCB1", "WNT2", "ADCY8", "MITF", "WNT9B", "ADCY1", "FZD7", "KRAS")
35	KEGG_SPHINGOLIPID_METABOLISM	0.191651	0.519446	0.13649	0.425853	1.22384	24	c("SGPL1", "ARSA", "ACER2", "GALC", "GLA", "SMPD2", "GLB1", "SMPD1", "NEU1", "NEU3", "KDSR", "PLPP1", "SGMS2", "ASAH1")
36	KEGG_CYSTEINE_AND_METHIONINE_METABOLISM	0.200389	0.524963	0.135002	0.417445	1.21556	26	c("SDS", "GOT1", "AHCY", "CBS", "GOT2", "MAT2B", "LDHB", "MPST", "MAT1A", "DNMT3A", "TAT")
37	KEGG_DORSO_VENTRAL_AXIS_FORMATION	0.238748	0.555088	0.122679	0.463338	1.2107	16	c("EGFR", "KRAS", "ETS2", "NOTCH1", "SPIRE1", "GRB2")
38	KEGG_THYROID_CANCER	0.212644	0.529942	0.129443	0.417983	1.20695	25	c("MYC", "NCOA4", "NTRK1", "KRAS", "CCDC6")
39	KEGG_GALACTOSE_METABOLISM	0.231225	0.544404	0.12564	0.454683	1.19976	17	c("PFKM", "AKR1B1", "UGP2", "GAA", "PFKL", "GANC", "GLA", "GLB1")
40	KEGG_NOTCH_SIGNALING_PATHWAY	0.213873	0.529942	0.129443	0.383906	1.19323	34	c("HES1", "DLL1", "MAML3", "NCOR2", "PSEN1", "MAML1", "NCSTN", "NOTCH1")
41	KEGG_AXON_GUIDANCE	0.181818	0.517582	0.140406	0.322824	1.18726	77	c("EFNA1", "PLXNB1", "SEMA6B", "UNC5B", "EPHA4", "RND1", "NCK2", "PPP3CC", "ABLIM3", "CFL2", "SEMA3F", "SEMA4C", "EFNB1", "PPP3CA", "SRGAP1", "SEMA4B", "SEMA5A", "KRAS", "EPHA2", "RHOD", "NFATC1", "PAK2", "MET", "SEMA6D", "SEMA6C", "ABL1", "SEMA4G")
42	KEGG_TGF_BETA_SIGNALING_PATHWAY	0.186441	0.517582	0.138022	0.343715	1.18022	55	c("FST", "MYC", "SMAD6", "ID2", "BMP2")
43	KEGG_HOMOLOGOUS_RECOMBINATION	0.268102	0.591669	0.114751	0.453098	1.17971	15	c("RPA2", "BLM", "POLD2", "NBN", "POLD3", "RPA1", "POLD1")
44	KEGG_GLYCEROLIPID_METABOLISM	0.249505	0.56595	0.120433	0.392371	1.16425	28	c("TKFC", "LPL", "AKR1B1", "ALDH1B1", "DGKH", "LIPG", "GK", "GLA")
45	KEGG_ARRHYTHMOGENIC_RIGHT_VENTRICULAR_CARDIOMYOPATHY_ARVC	0.241905	0.555485	0.119888	0.358297	1.15455	38	c("LAMA2", "DES", "ITGA7", "ITGA10", "DSP", "SGCB", "JUP", "ITGA3", "ITGA2B", "ITGA6", "CACNG5", "ACTN4", "ITGA9", "CTNNA1", "CACNA2D2", "ITGB4", "ACTN1")
46	KEGG_P53_SIGNALING_PATHWAY	0.269663	0.591669	0.111463	0.345304	1.1312	43	c("GADD45A", "CDKN1A", "GADD45G", "SESN2", "SERPINE1", "GTSE1", "GADD45B", "SIAH1", "CCND3", "BBC3")
47	KEGG_STARCH_AND_SUCROSE_METABOLISM	0.309886	0.604769	0.103576	0.399905	1.12482	22	c("PYGL", "PYGB", "GPI", "UGP2", "GAA", "GYS2", "GANC", "UGT1A1")
48	KEGG_DILATED_CARDIOMYOPATHY	0.28972	0.604769	0.10673	0.342861	1.11716	42	c("LAMA2", "DES", "ITGA7", "ITGA10", "TPM2", "ADCY8", "SGCB", "ITGA3", "ITGA2B", "ITGA6", "CACNG5", "ADCY1")
49	KEGG_ECM_RECEPTOR_INTERACTION	0.280534	0.599006	0.110122	0.33526	1.1131	47	c("LAMA2", "LAMB2", "ITGA7", "ITGA10", "COL6A2", "LAMA5", "LAMC1", "ITGA3", "ITGA2B", "ITGA6", "SDC4", "THBS1", "HMMR", "THBS2", "ITGA9", "COL1A1")
50	KEGG_GLYCOLYSIS_GLUCONEOGENESIS	0.312139	0.604769	0.103958	0.354605	1.10216	34	c("PCK1", "PFKM", "PKLR", "GPI", "ALDH1B1", "PFKL", "ALDH1A3", "ALDOA", "PCK2", "ENO3", "PGK1", "FBP1", "ALDOB")
51	KEGG_PENTOSE_AND_GLUCURONATE_INTERCONVERSIONS	0.386588	0.691397	0.0925529	0.477801	1.08994	9	c("AKR1B1", "UGP2", "UGT1A1", "XYLB", "GUSB", "DCXR")
52	KEGG_FOCAL_ADHESION	0.279851	0.599006	0.10882	0.267773	1.0813	129	c("JUN", "LAMA2", "MYL9", "CAV1", "PDGFRA", "LAMB2", "ITGA7", "EGFR", "ITGA10", "COL6A2", "LAMA5", "LAMC1", "TLN2", "PDGFB", "CCND3", "BCAR1", "ITGA3", "ITGA2B", "VCL", "ITGA6", "PDGFRB", "VAV2", "FLNB", "ACTN4", "THBS1", "THBS2", "ARHGAP35", "IGF1R", "ITGA9", "VEGFA", "COL1A1", "PAK2", "PARVA", "FLT1", "MET", "PDGFA", "ITGB4", "ACTN1")
53	KEGG_GNRH_SIGNALING_PATHWAY	0.31028	0.604769	0.102449	0.304684	1.08067	64	c("JUN", "MAP2K6", "EGFR", "PLCB1", "PLA2G6", "ADCY8", "HBEGF", "GNA11", "MAP2K3", "ADCY1", "ITPR3", "KRAS", "PRKCD", "MMP2")
54	KEGG_PRION_DISEASES	0.357977	0.677703	0.0962406	0.365243	1.07511	27	c("EGR1", "PRNP", "LAMC1")
55	KEGG_PEROXISOME	0.311567	0.604769	0.10208	0.30201	1.07497	65	c("FAR2", "MPV17L", "ACSL3", "ABCD3", "SOD2", "IDH2", "PEX16", "ACSL1", "GSTK1", "PEX3", "ECH1", "ACOX1", "DHRS4", "HSD17B4", "EPHX2", "EHHADH", "SLC27A2", "ACSL5", "PEX1", "ABCD4", "PXMP4")
56	KEGG_NUCLEOTIDE_EXCISION_REPAIR	0.373814	0.683344	0.0922597	0.334878	1.05692	35	c("RPA2", "LIG1", "POLD2", "ERCC2", "XPC", "ERCC3", "CDK7", "RAD23B", "ERCC1", "XPA", "POLD3", "RPA1", "CCNH", "POLD1", "DDB1", "RFC3", "ERCC6", "POLE3")
57	KEGG_HEDGEHOG_SIGNALING_PATHWAY	0.413861	0.723595	0.0888945	0.352223	1.04512	28	c("WNT10B", "WNT1", "PTCH1", "BMP2", "WNT2", "PTCH2", "WNT9B")
58	KEGG_SULFUR_METABOLISM	0.428862	0.731819	0.0883594	0.488881	1.04111	7	c("SULT1A1", "CHST12")
59	KEGG_BASE_EXCISION_REPAIR	0.420152	0.723595	0.0857844	0.366371	1.0305	22	c("PARP2", "UNG", "FEN1", "LIG1", "POLD2", "POLD3", "APEX1", "POLD1", "NEIL2", "NEIL1")
60	KEGG_REGULATION_OF_ACTIN_CYTOSKELETON	0.391555	0.693611	0.0902635	0.254906	1.0286	131	c("BAIAP2", "CD14", "MYL9", "PDGFRA", "FGFR1", "ITGA7", "EGFR", "ITGA10", "FGF21", "SSH2", "WASL", "RRAS", "CFL2", "PDGFB", "MYH10", "INSRR", "BCAR1", "ITGA3", "ITGA2B", "VCL", "ITGA6", "PDGFRB", "VAV2", "ACTN4", "KRAS", "FGFR2", "ARHGAP35")
61	KEGG_VASCULAR_SMOOTH_MUSCLE_CONTRACTION	0.381853	0.689559	0.0908241	0.284468	1.02374	69	c("ACTA2", "MYL9", "ADRA1A", "PTGIR", "NPR2", "PLCB1", "PLA2G6", "ADCY8", "ACTG2", "PRKCH", "GNA11", "ADCY1", "ITPR3", "PRKCD")
62	KEGG_PHENYLALANINE_METABOLISM	0.445783	0.742297	0.0855357	0.401662	1.02257	14	c("GOT1", "PAH", "MAOB", "ALDH1A3", "GOT2", "HPD")
63	KEGG_GLYCOSAMINOGLYCAN_BIOSYNTHESIS_KERATAN_SULFATE	0.451677	0.742297	0.0838361	0.444214	1.01332	9	c("CHST2", "B3GNT2", "ST3GAL3", "B4GAT1", "B4GALT4")
64	KEGG_GLYCOSAMINOGLYCAN_DEGRADATION	0.450098	0.742297	0.0835991	0.386384	1.00962	16	c("HEXA", "NAGLU", "GNS", "GLB1", "HEXB", "GUSB", "SGSH")
65	KEGG_ADHERENS_JUNCTION	0.444649	0.742297	0.0810802	0.294652	1.00894	52	c("BAIAP2", "FGFR1", "EGFR", "WASL", "SSX2IP", "PARD3", "PTPRJ", "VCL", "ACTN4", "CSNK2B", "IGF1R", "CTNNA1", "MET", "ACTN1", "WASF2")
66	KEGG_NEUROTROPHIN_SIGNALING_PATHWAY	0.455408	0.742297	0.0813027	0.265704	1.00436	93	c("IRS2", "JUN", "FOXO3", "SH2B2", "NFKBIA", "TRAF6", "NTRK1", "PSEN1", "PLCG1", "GAB1", "NFKBIB", "KRAS", "SH2B3", "PRKCD")
67	KEGG_VASOPRESSIN_REGULATED_WATER_REABSORPTION	0.495127	0.787125	0.0782955	0.320353	0.986216	32	c("AQP3", "DYNC2H1", "NSF", "VAMP2", "GNAS", "ARHGDIB", "CREB3L3", "RAB11B", "DCTN1", "DYNC1H1")
68	KEGG_PARKINSONS_DISEASE	0.468284	0.750869	0.078921	0.277067	0.986186	65	c("UBE2G2", "UBB", "ATP5F1A", "NDUFV3", "COX6B1", "COX4I1", "VDAC2", "SLC25A4", "CYC1", "COX5A", "UQCR11", "NDUFB7", "NDUFB9", "NDUFS7", "SDHB", "NDUFV2", "UQCRFS1", "NDUFS8", "UQCRC1", "NDUFS1", "NDUFA8", "NDUFS3", "NDUFA9", "UBA1", "SDHC", "PARK7", "NDUFB6", "NDUFB8", "COX7A2")
69	KEGG_LYSINE_DEGRADATION	0.506744	0.792091	0.0764767	0.313112	0.973194	34	c("SETDB2", "ALDH1B1", "PLOD1", "OGDH", "SETD1A", "BBOX1", "EHHADH", "PLOD2", "AADAT", "PLOD3")
70	KEGG_INSULIN_SIGNALING_PATHWAY	0.532319	0.792091	0.0732559	0.254728	0.967505	97	c("IRS2", "PPARGC1A", "PCK1", "PYGL", "PYGB", "PKLR", "SH2B2", "SREBF1", "FOXO1", "PRKAB2", "TRIP10", "PCK2", "GYS2", "EIF4EBP1", "PDE3A", "KRAS", "TSC2", "RHOQ", "FBP1")
71	KEGG_ACUTE_MYELOID_LEUKEMIA	0.514231	0.792091	0.0749279	0.291932	0.966013	45	c("MYC", "ZBTB16", "JUP", "EIF4EBP1", "KRAS", "PIM2")
72	KEGG_ASCORBATE_AND_ALDARATE_METABOLISM	0.520325	0.792091	0.077884	0.448506	0.955127	7	c("ALDH1B1", "UGT1A1", "ALDH2", "ALDH7A1")
73	KEGG_PORPHYRIN_AND_CHLOROPHYLL_METABOLISM	0.539924	0.797031	0.0725352	0.338878	0.953169	22	c("ALAS2", "ALAS1", "COX10", "HMOX2", "UGT1A1", "HCCS", "GUSB")
74	KEGG_SMALL_CELL_LUNG_CANCER	0.564972	0.824252	0.0697793	0.269605	0.944855	60	c("MYC", "LAMA2", "LAMB2", "NFKBIA", "TRAF6", "LAMA5", "LAMC1", "E2F2", "ITGA3", "ITGA2B", "ITGA6")
75	KEGG_CALCIUM_SIGNALING_PATHWAY	0.617702	0.870399	0.0653834	0.25568	0.931608	74	c("PLCD3", "PDGFRA", "EDNRB", "ADRA1A", "EGFR", "GNA15", "PLCB1", "PPP3CC", "ADCY8", "ATP2A1", "PLCG1", "PPP3CA", "PDGFRB", "GNA11", "ADCY1", "ITPR3", "PLCD1", "VDAC2", "SLC25A4")
76	KEGG_ENDOMETRIAL_CANCER	0.576779	0.831635	0.0684715	0.285912	0.926611	41	c("MYC", "FOXO3", "EGFR")
77	KEGG_HUNTINGTONS_DISEASE	0.662879	0.893445	0.062249	0.23375	0.910047	108	c("PPARGC1A", "SOD2", "TAF4", "PLCB1", "ATP5F1A", "TGM2", "BBC3", "NDUFV3", "COX6B1", "COX4I1", "VDAC2", "SLC25A4", "AP2A1", "CYC1", "COX5A", "UQCR11", "NDUFB7", "NDUFB9", "NDUFS7", "SDHB", "NDUFV2", "CREB3L3", "UQCRFS1", "NDUFS8", "UQCRC1", "DCTN1", "NDUFS1", "NDUFA8", "NDUFS3", "NDUFA9", "SDHC", "NDUFB6", "NDUFB8", "COX7A2", "DNAL4", "POLR2F")
78	KEGG_TYROSINE_METABOLISM	0.631879	0.872222	0.0646485	0.31132	0.894691	24	c("TPO", "GOT1", "MAOB", "ALDH1A3", "GOT2", "HPD", "FAH", "COMT")
79	KEGG_COLORECTAL_CANCER	0.699433	0.915148	0.0596037	0.260962	0.866857	46	c("MYC", "JUN")
80	KEGG_ALZHEIMERS_DISEASE	0.777567	0.946687	0.0549074	0.224856	0.85597	98	c("LPL", "PLCB1", "PPP3CC", "APOE", "ATP5F1A", "PSEN1", "ATP2A1", "PPP3CA", "NDUFV3", "COX6B1", "ITPR3", "BACE2", "NCSTN", "COX4I1", "APP", "CYC1", "COX5A", "UQCR11", "NDUFB7", "NDUFB9", "NDUFS7", "SDHB", "NDUFV2", "UQCRFS1", "NDUFS8", "UQCRC1", "NDUFS1", "NDUFA8", "NDUFS3", "PSEN2", "NDUFA9", "SDHC", "NDUFB6", "NDUFB8", "COX7A2", "BAD", "ATF6", "SDHA")
81	KEGG_PROSTATE_CANCER	0.786389	0.946687	0.0541201	0.233037	0.838651	69	c("CDKN1A", "PDGFRA", "FGFR1", "EGFR", "NFKBIA", "FOXO1", "HSP90AB1", "E2F2", "PDGFB", "INSRR", "PDGFRB", "KRAS", "FGFR2", "IGF1R", "PDGFA", "E2F3", "IKBKB", "CREB3L3", "TGFA", "GRB2")
82	KEGG_ENDOCYTOSIS	0.829746	0.946826	0.0532386	0.208196	0.838131	133	c("RAB11FIP5", "DNM1", "PDGFRA", "EGFR", "MVB12B", "TRAF6", "NTRK1", "ASAP2", "LDLRAP1", "VPS37B", "PARD6G", "EPN2", "PARD3", "HSPA2", "GRK5", "SMAP1", "FGFR2", "GRK4", "IGF1R", "AP2A1", "HSPA1L", "AGAP1", "FLT1", "HSPA8", "MET", "CBLB", "RAB31", "CHMP1B", "RAB11B", "EHD2", "EHD3")
83	KEGG_TRYPTOPHAN_METABOLISM	0.728346	0.927893	0.0596037	0.273917	0.835738	31	c("ALDH1B1", "CYP1B1", "MAOB", "OGDH", "CYP1A2", "TDO2", "EHHADH", "AADAT")
84	KEGG_ONE_CARBON_POOL_BY_FOLATE	0.708502	0.915148	0.062249	0.336653	0.818865	12	c("FTCD", "SHMT1", "MTHFD1", "DHFR", "ATIC")
85	KEGG_MELANOMA	0.808349	0.946687	0.0530213	0.243782	0.806684	45	c("CDKN1A", "PDGFRA", "FGFR1", "EGFR", "FGF21", "E2F2", "PDGFB", "MITF", "PDGFRB", "KRAS")
86	KEGG_GLYCEROPHOSPHOLIPID_METABOLISM	0.803435	0.946687	0.0535669	0.243548	0.801299	44	c("GPD2", "PHOSPHO1", "DGKH", "ACHE", "PLA2G6", "CHKB", "PEMT", "CHPT1", "MBOAT7", "PTDSS1", "PLA2G12B", "GPD1L", "AGPAT3")
87	KEGG_LONG_TERM_POTENTIATION	0.837786	0.950172	0.0516356	0.237134	0.780195	44	c("PLCB1", "PPP3CC", "ADCY8", "PPP3CA", "ADCY1", "ITPR3", "KRAS")
88	KEGG_GLYCOSPHINGOLIPID_BIOSYNTHESIS_LACTO_AND_NEOLACTO_SERIES	0.726358	0.927893	0.0607719	0.344505	0.762237	8	c("B3GNT2", "ST3GAL3", "B4GAT1", "ST3GAL4", "B4GALT4")
89	KEGG_GLYCOSAMINOGLYCAN_BIOSYNTHESIS_HEPARAN_SULFATE	0.795181	0.946687	0.0564118	0.299265	0.761881	14	c("EXT1", "EXTL1", "XYLT2", "HS2ST1")
90	KEGG_EPITHELIAL_CELL_SIGNALING_IN_HELICOBACTER_PYLORI_INFECTION	0.869565	0.967263	0.0494905	0.228593	0.759335	46	c("JUN", "EGFR", "NFKBIA", "HBEGF", "ATP6V0A1", "PLCG1", "ATP6V1B2", "JAM3", "MET", "IKBKB", "ATP6AP1", "MAPK9", "MAPK13", "ATP6V1D", "ATP6V1H", "JAM2", "RAC1", "ATP6V0E1", "ATP6V0D1", "LYN")
91	KEGG_ARACHIDONIC_ACID_METABOLISM	0.782779	0.946687	0.0559429	0.286331	0.748182	16	c("CBR3", "PLA2G6", "GPX4", "CYP2E1", "PLA2G12B", "EPHX2")
92	KEGG_LIMONENE_AND_PINENE_DEGRADATION	0.783037	0.946687	0.0562941	0.322373	0.735381	9	c("ALDH1B1", "EHHADH", "ALDH2", "ALDH7A1", "HADHA")
93	KEGG_PURINE_METABOLISM	0.967864	0.992126	0.0445962	0.18914	0.732993	106	c("ADCY10", "PKLR", "NPR2", "PPAT", "ADCY8", "PDE4A", "NT5C", "PDE10A", "ADCY1", "PDE3A", "POLD2", "IMPDH1", "ADK", "PDE5A", "ENTPD6", "APRT", "POLR3G", "ENPP1", "POLD3", "POLR1E", "POLR3H", "ENTPD8", "NME7", "POLD1", "POLR1B", "POLA1", "PRPS2")
94	KEGG_SPLICEOSOME	0.979008	0.992126	0.0445071	0.190814	0.726784	99	c("SRSF5", "SNRNP200", "HNRNPA1", "RBM17", "HSPA2", "DDX5", "RBM22", "DHX38", "WBP11", "EFTUD2", "XAB2", "SMNDC1", "DDX39B", "SF3A1", "SF3B1", "HSPA1L", "HSPA8", "SART1", "SLU7", "SF3B4", "PRPF31", "RBM8A", "SYF2", "SF3B2", "DDX46")
95	KEGG_FOLATE_BIOSYNTHESIS	0.815789	0.946687	0.0555947	0.338472	0.689853	6	c("FPGS", "DHFR")
96	KEGG_RIBOSOME	0.96679	0.992126	0.0435378	0.191344	0.658031	54	c("UBA52", "RPL35", "RPL18", "RPL36", "RPL34", "RPS11", "RPL24", "RPSA", "RPL12", "RPS15", "RPL14", "RPL7A", "RPS9", "RPS18", "RPL32", "RPL37A", "RPS13", "RPS10", "RPS28", "FAU", "RPL21", "RPL13", "RPS5", "RPL5", "RPS4X")
97	KEGG_PANTOTHENATE_AND_COA_BIOSYNTHESIS	0.880567	0.967263	0.052057	0.26958	0.65572	12	c("COASY", "DPYD", "ENPP1", "PANK4", "UPB1")
98	KEGG_VIBRIO_CHOLERAE_INFECTION	0.929924	0.992126	0.0465084	0.203241	0.652303	37	c("CFTR", "SLC12A2", "ATP6V0A1", "PLCG1", "ATP6V1B2", "GNAS", "ATP6AP1", "SEC61G", "ATP6V1D", "ATP6V1H", "ATP6V0E1", "ATP6V0D1", "ATP6V1C1", "ADCY9", "PRKACA")
99	KEGG_RIBOFLAVIN_METABOLISM	0.904858	0.983501	0.0508054	0.261771	0.636726	12	c("ACP5", "ACP6", "ENPP1")
100	KEGG_VALINE_LEUCINE_AND_ISOLEUCINE_BIOSYNTHESIS	0.882591	0.967263	0.0519512	0.305371	0.622389	6	c("VARS2", "PDHA1", "PDHB", "BCAT2")
101	KEGG_AMINOACYL_TRNA_BIOSYNTHESIS	0.941509	0.992126	0.0457704	0.217781	0.608902	21	c("VARS2", "FARSA", "SARS2", "DARS2")
102	KEGG_GLYCOSYLPHOSPHATIDYLINOSITOL_GPI_ANCHOR_BIOSYNTHESIS	0.961977	0.992126	0.0451344	0.205995	0.586242	23	c("PIGM", "PIGH", "PIGO", "PIGS", "PIGB", "PIGY", "PIGA", "PIGQ")
103	KEGG_SELENOAMINO_ACID_METABOLISM	0.973129	0.992126	0.0450443	0.208863	0.560121	18	c("AHCY", "CBS", "MAT2B")
104	KEGG_GLUTATHIONE_METABOLISM	0.992126	0.992126	0.0453152	0.158463	0.483482	31	c("IDH2", "GPX4", "GSTK1", "GSTM3")
105	KEGG_RNA_POLYMERASE	0.985294	0.992126	0.0486034	-0.18664	-0.528809	22	c("POLR3K", "POLR3B", "POLR2D", "POLR3D", "POLR2H", "POLR2G", "POLR1A", "POLR1D", "POLR2L", "POLR2K", "POLR2B", "POLR2J", "POLR3C", "POLR2I", "POLR1C", "POLR3A", "POLR2F", "POLR3F", "POLR1B", "POLR3H", "POLR1E", "POLR3G")
106	KEGG_BASAL_TRANSCRIPTION_FACTORS	0.989496	0.992126	0.0484088	-0.186326	-0.531038	23	c("GTF2E1", "TBPL1", "TAF12", "TBP", "GTF2A1", "GTF2E2", "TAF5")
107	KEGG_RENIN_ANGIOTENSIN_SYSTEM	0.968254	0.992126	0.0467883	-0.226098	-0.545195	11	c("ACE2", "AGTR1", "LNPEP")
108	KEGG_PROPANOATE_METABOLISM	0.972917	0.992126	0.048799	-0.189424	-0.55587	25	ACSS1
109	KEGG_REGULATION_OF_AUTOPHAGY	0.933472	0.992126	0.0506004	-0.230778	-0.620712	18	c("PRKAA2", "ATG4D", "ATG4B", "PRKAA1", "ULK3", "ATG4C", "ULK2")
110	KEGG_RNA_DEGRADATION	0.916143	0.984986	0.0518458	-0.217755	-0.698147	38	c("MPHOSPH6", "EXOSC6", "PAPOLA", "CNOT2", "LSM7", "DIS3", "LSM6", "CNOT3", "LSM5", "C1D", "EXOSC3", "EXOSC7", "PNPT1", "EDC3", "LSM1")
111	KEGG_NICOTINATE_AND_NICOTINAMIDE_METABOLISM	0.819444	0.946687	0.0544556	-0.278951	-0.71832	14	c("CD38", "NAMPT")
112	KEGG_GLYCOSPHINGOLIPID_BIOSYNTHESIS_GANGLIO_SERIES	0.813725	0.946687	0.0542316	-0.34065	-0.721884	7	c("ST3GAL5", "ST3GAL1")
113	KEGG_N_GLYCAN_BIOSYNTHESIS	0.884058	0.967263	0.052913	-0.23054	-0.725304	34	c("MOGS", "STT3B", "ST6GAL1", "DPM2", "ALG2", "ALG11", "ALG10B", "RPN1", "MAN1B1", "DOLPP1", "ALG12", "MAN1A1", "ALG6", "MGAT4B")
114	KEGG_DRUG_METABOLISM_OTHER_ENZYMES	0.825	0.946826	0.0564118	-0.255765	-0.750549	25	c("CDA", "TYMP", "NAT2", "UCK1", "ITPA", "UGT2A3")
115	KEGG_INOSITOL_PHOSPHATE_METABOLISM	0.850427	0.958664	0.0561767	-0.233128	-0.766118	43	c("PLCB2", "PIK3CG", "PIK3CD", "IMPA1", "PIP4K2A", "PLCE1", "PIK3CA", "PTEN", "PLCB4", "PIK3CB", "INPPL1", "INPP5E", "PIK3C2A")
116	KEGG_TIGHT_JUNCTION	0.909474	0.983501	0.0523759	-0.207631	-0.768949	82	c("AKT3", "CLDN2", "GNAI1", "CLDN15", "PRKCI", "CLDN10", "OCLN", "YES1", "RRAS2", "TJP2", "CRB3")
117	KEGG_DRUG_METABOLISM_CYTOCHROME_P450	0.801217	0.946687	0.05653	-0.254087	-0.776267	30	c("ALDH3A1", "ALDH3B1", "ADH4")
118	KEGG_OOCYTE_MEIOSIS	0.866953	0.967263	0.0554793	-0.217038	-0.779108	71	c("PGR", "ADCY5")
119	KEGG_VALINE_LEUCINE_AND_ISOLEUCINE_DEGRADATION	0.797468	0.946687	0.0585938	-0.251097	-0.799264	37	HMGCS1
120	KEGG_RENAL_CELL_CARCINOMA	0.773913	0.946687	0.0614364	-0.239182	-0.818504	52	c("AKT3", "PIK3CG", "PAK1", "PIK3CD", "VEGFB", "PAK4")
121	KEGG_PROTEIN_EXPORT	0.704545	0.915148	0.0635008	-0.295924	-0.819311	20	c("IMMP1L", "SPCS2", "SRP14", "SRP9", "SEC11A", "SEC61B", "SEC61A2", "HSPA5")
122	KEGG_PHOSPHATIDYLINOSITOL_SIGNALING_SYSTEM	0.743478	0.934371	0.0633597	-0.244201	-0.835678	52	c("PLCB2", "PIK3CG", "PIK3CD", "IMPA1", "PIP4K2A", "DGKA", "PLCE1", "PIK3CA", "INPP5D", "PTEN", "DGKQ", "PLCB4", "PIK3CB", "INPPL1", "PRKCB", "INPP5E", "PIK3C2A", "CALM2")
123	KEGG_CHRONIC_MYELOID_LEUKEMIA	0.739407	0.934371	0.0623861	-0.241836	-0.844256	56	c("AKT3", "CDK6", "PIK3CG", "PIK3CD", "NFKB1", "IKBKG", "HDAC2", "PIK3CA", "CCND1", "CRKL", "SMAD3", "AKT2", "SOS1", "PIK3CB", "CDK4", "HDAC1", "SHC1", "MAPK3", "PTPN11", "CRK", "BRAF", "MECOM", "TP53", "CHUK")
124	KEGG_GLIOMA	0.700837	0.915148	0.0643583	-0.250114	-0.845271	47	c("AKT3", "CDK6", "PIK3CG", "PIK3CD", "PIK3CA", "CCND1", "IGF1", "PTEN", "AKT2", "SOS1", "PIK3CB", "CDK4", "PRKCB", "SHC1", "CALM2", "MAPK3", "BRAF", "TP53")
125	KEGG_NON_HOMOLOGOUS_END_JOINING	0.676171	0.904804	0.0647943	-0.367536	-0.856425	10	c("LIG4", "NHEJ1", "PRKDC", "POLL", "RAD50")
126	KEGG_AMINO_SUGAR_AND_NUCLEOTIDE_SUGAR_METABOLISM	0.701863	0.915148	0.0637845	-0.27405	-0.862192	34	c("GCK", "NANP", "GFPT1", "NPL", "FPGT", "GMPPB", "GNPNAT1")
127	KEGG_BETA_ALANINE_METABOLISM	0.650526	0.88969	0.0683111	-0.317401	-0.864217	19	CNDP1
128	KEGG_GLYCOSAMINOGLYCAN_BIOSYNTHESIS_CHONDROITIN_SULFATE	0.623762	0.872222	0.0673624	-0.345775	-0.875681	13	c("CSGALNACT2", "CHST13", "B4GALT7", "CHSY3")
129	KEGG_ETHER_LIPID_METABOLISM	0.633065	0.872222	0.0675189	-0.329616	-0.877699	17	c("PLA2G4A", "PLD1", "LPCAT2", "AGPS")
130	KEGG_ANTIGEN_PROCESSING_AND_PRESENTATION	0.655936	0.89054	0.0656814	-0.294223	-0.883496	28	c("CIITA", "NFYA", "HSPA4", "PSME2", "TAP1", "CREB1", "B2M", "CTSS")
131	KEGG_PYRIMIDINE_METABOLISM	0.591489	0.839825	0.0736213	-0.252378	-0.913748	73	c("CDA", "CMPK2", "UPRT", "NME6", "TYMP", "POLR3K", "POLE4", "ENTPD1", "POLR3B", "UCK1", "PRIM1", "CAD", "ITPA", "NUDT2", "CTPS2", "POLR2D", "CTPS1")
132	KEGG_VIRAL_MYOCARDITIS	0.587525	0.839825	0.0711327	-0.30479	-0.915226	28	c("CASP3", "CD80", "CD40", "DMD", "RAC2", "CASP9", "CCND1", "DAG1")
133	KEGG_METABOLISM_OF_XENOBIOTICS_BY_CYTOCHROME_P450	0.567227	0.824252	0.0751182	-0.324705	-0.925428	23	c("ALDH3A1", "ALDH3B1", "ADH4")
134	KEGG_GLYOXYLATE_AND_DICARBOXYLATE_METABOLISM	0.526733	0.792091	0.0758887	-0.369975	-0.936967	13	c("HAO2", "AFMID", "HAO1")
135	KEGG_NON_SMALL_CELL_LUNG_CANCER	0.515856	0.792091	0.08042	-0.283535	-0.95201	46	c("AKT3", "CDK6", "PIK3CG", "PIK3CD", "CASP9", "PIK3CA", "CCND1", "AKT2", "SOS1", "STK4", "PIK3CB", "CDK4", "PRKCB", "MAPK3", "BRAF", "TP53")
136	KEGG_LINOLEIC_ACID_METABOLISM	0.521654	0.792091	0.0760837	-0.473885	-0.960469	6	PLA2G4A
137	KEGG_BUTANOATE_METABOLISM	0.529412	0.792091	0.0787114	-0.337579	-0.96212	23	HMGCS1
138	KEGG_TYPE_II_DIABETES_MELLITUS	0.458947	0.742297	0.08654	-0.346209	-1.00069	24	c("GCK", "SOCS2", "PIK3CG", "PIK3CD")
139	KEGG_LEUKOCYTE_TRANSENDOTHELIAL_MIGRATION	0.418605	0.723595	0.0919686	-0.28206	-1.00893	69	c("CLDN2", "GNAI1", "ITGA4", "CXCL12", "PIK3CG", "PIK3CD", "CLDN15", "RAC2", "CLDN10", "OCLN", "VCAM1")
140	KEGG_LONG_TERM_DEPRESSION	0.360587	0.677703	0.100279	-0.328387	-1.05284	38	c("PLA2G4A", "GNAI1", "PLCB2")
141	KEGG_HISTIDINE_METABOLISM	0.374737	0.683344	0.0982123	-0.368579	-1.06535	24	c("CNDP1", "ALDH3A1", "ALDH3B1")
142	KEGG_MATURITY_ONSET_DIABETES_OF_THE_YOUNG	0.364356	0.677703	0.0962406	-0.424748	-1.07568	13	c("GCK", "FOXA3", "ONECUT1", "HNF4G")
143	KEGG_FC_EPSILON_RI_SIGNALING_PATHWAY	0.294872	0.604769	0.114267	-0.324019	-1.10036	50	c("PLA2G4A", "AKT3", "BTK", "PIK3CG", "SYK", "PIK3CD", "RAC2", "LCP2", "PIK3CA", "INPP5D")
144	KEGG_JAK_STAT_SIGNALING_PATHWAY	0.270386	0.591669	0.120433	-0.313145	-1.10686	63	c("AKT3", "SOCS2", "STAT2", "IL11RA", "IL10RA", "PIK3CG", "STAT1", "PIK3CD", "IL2RG", "CSF3R", "SOCS5", "CCND2", "PIAS1", "IL13RA1", "GHR", "PIK3CA", "SPRED1", "JAK3", "CCND1", "IL22RA1", "PIAS4")
145	KEGG_SNARE_INTERACTIONS_IN_VESICULAR_TRANSPORT	0.297189	0.604769	0.109684	-0.3659	-1.11138	29	c("STX7", "VAMP5", "BET1", "STX4", "SNAP23", "VAMP8", "GOSR1", "BNIP1", "STX2", "VAMP7")
146	KEGG_ALPHA_LINOLENIC_ACID_METABOLISM	0.362745	0.677703	0.0959207	-0.524715	-1.11194	7	PLA2G4A
147	KEGG_LEISHMANIA_INFECTION	0.283401	0.599006	0.113313	-0.361906	-1.1146	31	c("ITGA4", "MYD88", "IL1B", "STAT1", "TLR4", "NFKB1")
148	KEGG_MTOR_SIGNALING_PATHWAY	0.230769	0.544404	0.131458	-0.352196	-1.14362	41	c("AKT3", "PIK3CG", "PIK3CD", "VEGFB", "PRKAA2", "PIK3CA", "EIF4E", "RPS6KA3", "IGF1", "PRKAA1", "ULK3", "AKT2", "PIK3CB", "ULK2", "MAPK3", "MLST8", "BRAF")
149	KEGG_ASTHMA	0.303462	0.604769	0.10925	-0.767186	-1.16102	2	CD40
150	KEGG_HEMATOPOIETIC_CELL_LINEAGE	0.22334	0.539497	0.129443	-0.393425	-1.18138	28	c("ITGA4", "IL11RA", "CD38", "IL1B", "ITGA5", "CSF3R", "GP5", "CSF1", "THPO")
151	KEGG_PPAR_SIGNALING_PATHWAY	0.206316	0.529942	0.138805	-0.355089	-1.18804	45	c("CYP7A1", "FABP5", "FABP7", "FABP1", "FABP3")
152	KEGG_VEGF_SIGNALING_PATHWAY	0.19958	0.524963	0.141225	-0.352364	-1.19605	48	c("PLA2G4A", "AKT3", "PIK3CG", "PIK3CD", "NFATC2", "RAC2", "CASP9")
153	KEGG_O_GLYCAN_BIOSYNTHESIS	0.216535	0.529942	0.130106	-0.493768	-1.22765	12	c("GALNT16", "ST3GAL1", "GALNT11", "GALNT10", "GALNT3")
154	KEGG_NOD_LIKE_RECEPTOR_SIGNALING_PATHWAY	0.184265	0.517582	0.146416	-0.390244	-1.22775	34	c("CASP1", "CCL8", "IL1B", "CCL5", "NFKB1", "IKBKG", "NOD2", "IL18", "PYCARD")
155	KEGG_AMYOTROPHIC_LATERAL_SCLEROSIS_ALS	0.192698	0.519446	0.141225	-0.402774	-1.23053	30	c("CASP1", "TOMM40L", "CASP3", "MAP3K5", "ALS2", "SLC1A2", "CASP9")
156	KEGG_BIOSYNTHESIS_OF_UNSATURATED_FATTY_ACIDS	0.179226	0.517582	0.147331	-0.488675	-1.26157	15	c("ELOVL2", "BAAT", "FADS1", "YOD1", "HSD17B12", "HACD1")
157	KEGG_T_CELL_RECEPTOR_SIGNALING_PATHWAY	0.130901	0.419787	0.179782	-0.359278	-1.27087	65	c("AKT3", "PTPRC", "CARD11", "RASGRP1", "PIK3CG", "PAK1", "PIK3CD", "NFATC2", "NFKB1", "PAK4", "IKBKG", "NCK1", "LCP2", "MAP3K14", "PIK3CA")
158	KEGG_UBIQUITIN_MEDIATED_PROTEOLYSIS	0.102345	0.359174	0.204295	-0.332679	-1.28057	101	c("UBE2L6", "MID1", "MAP3K1", "HERC1", "TRIM32", "UBE2W", "COP1", "PIAS1", "UBA7", "PML", "DET1", "RNF7", "HERC2", "CDC27", "CUL5", "PIAS4", "UBE2F", "CDC23", "KLHL13", "RBX1", "RCHY1", "DDB2", "UBE2R2", "UBE2Q2", "FBXW7", "TRIM37", "UBE2N", "KEAP1", "HUWE1", "UBE2E3", "BTRC", "UBA3", "WWP1", "CUL4B", "UBE2Z", "UBE2D1", "UBE2I", "UBE3C", "SKP2", "ANAPC10", "CUL2", "FBXO4", "ITCH", "CDC26", "UBE3A…
159	KEGG_FC_GAMMA_R_MEDIATED_PHAGOCYTOSIS	0.111579	0.384327	0.193813	-0.36334	-1.29748	68	c("PLA2G4A", "AKT3", "PTPRC", "DNM3", "PIK3CG", "PAK1", "SYK", "PIK3CD", "ASAP3", "RAC2", "PLD1", "HCK", "LIMK1", "PIK3CA", "INPP5D", "WAS", "CRKL", "VAV1", "SPHK2", "AKT2", "ARPC5", "PIK3CB")
160	KEGG_NATURAL_KILLER_CELL_MEDIATED_CYTOTOXICITY	0.121019	0.409265	0.186433	-0.372959	-1.29769	55	c("FAS", "CASP3", "PIK3CG", "PAK1", "SYK", "PIK3CD", "NFATC2", "RAC2", "LCP2", "PIK3CA", "PTK2B", "VAV1", "SOS1", "PIK3CB", "PRKCB", "SHC1", "MAPK3", "PTPN11", "BRAF", "TYROBP", "FCER1G", "NFAT5")
161	KEGG_RIG_I_LIKE_RECEPTOR_SIGNALING_PATHWAY	0.092827	0.33826	0.213928	-0.41605	-1.32433	37	c("IRF7", "CXCL10", "MAP3K1", "NFKB1", "IKBKG", "CYLD", "TRADD", "MAVS", "DHX58", "TRIM25", "SIKE1", "FADD", "RIPK1")
162	KEGG_STEROID_HORMONE_BIOSYNTHESIS	0.156746	0.477947	0.156312	-0.51545	-1.32732	14	c("CYP7A1", "SRD5A1", "AKR1D1")
163	KEGG_OLFACTORY_TRANSDUCTION	0.126273	0.412048	0.17822	-0.57444	-1.33855	10	c("PDE1C", "GRK3", "PRKACB", "CALM2")
164	KEGG_PANCREATIC_CANCER	0.0826087	0.33826	0.231127	-0.397656	-1.36082	52	c("AKT3", "CDK6", "PIK3CG", "STAT1", "PIK3CD", "VEGFB", "NFKB1", "IKBKG", "RAC2", "PLD1", "CASP9", "RALA", "PIK3CA", "CCND1")
165	KEGG_PROGESTERONE_MEDIATED_OOCYTE_MATURATION	0.0808511	0.33826	0.231127	-0.390387	-1.36454	58	c("PGR", "AKT3", "GNAI1", "ADCY5", "PIK3CG", "PIK3CD")
166	KEGG_AUTOIMMUNE_THYROID_DISEASE	0.124752	0.412048	0.176694	-0.707711	-1.37644	5	c("FAS", "CD80", "CD40")
167	KEGG_B_CELL_RECEPTOR_SIGNALING_PATHWAY	0.0336648	0.217439	0.321776	-0.414249	-1.42926	54	c("AKT3", "CARD11", "BTK", "RASGRP3", "PIK3CG", "PIK3AP1", "SYK", "PIK3CD", "NFATC2", "NFKB1", "IKBKG", "RAC2")
168	KEGG_PROTEASOME	0.0545073	0.289668	0.282013	-0.454151	-1.43639	36	c("PSMB9", "PSMB8", "PSMC6", "PSMD14", "PSME2", "PSMA4", "PSMA1", "PSMA2", "PSMC2", "PSMA3", "PSMD11", "PSMC3", "PSMA5", "PSMB2", "PSMD7", "PSMB6", "PSME1", "PSMB1", "PSMD1", "PSMD2", "PSMD6")
169	KEGG_SYSTEMIC_LUPUS_ERYTHEMATOSUS	0.0842105	0.33826	0.224966	-0.529753	-1.44241	19	c("CD80", "CD40", "C8A", "TRIM21", "C4B", "C9")
170	KEGG_STEROID_BIOSYNTHESIS	0.0892857	0.33826	0.2114	-0.566409	-1.45854	14	c("TM7SF2", "NSDHL", "MSMO1", "LSS", "SQLE", "CYP27B1")
171	KEGG_TOLL_LIKE_RECEPTOR_SIGNALING_PATHWAY	0.0372682	0.231063	0.321776	-0.417544	-1.4657	59	c("AKT3", "IRF7", "TLR3", "CXCL10", "MYD88", "IL1B", "CD80", "PIK3CG", "CD40", "STAT1", "PIK3CD", "CCL5", "TLR4", "NFKB1", "IKBKG")
172	KEGG_CELL_ADHESION_MOLECULES_CAMS	0.0460893	0.26504	0.321776	-0.437848	-1.47014	46	c("PTPRC", "CLDN2", "ITGA4", "CD274", "CD80", "CD40", "SELL", "SDC1", "CLDN15", "CLDN10", "OCLN", "VCAM1", "SIGLEC1")
173	KEGG_APOPTOSIS	0.0470232	0.26504	0.321776	-0.421877	-1.47461	58	c("AKT3", "FAS", "MYD88", "CASP3", "IL1B", "PIK3CG", "PIK3CD", "NFKB1", "IKBKG", "TRADD", "CASP9", "IRAK3", "MAP3K14", "PIK3CA", "FADD", "RIPK1", "PRKACB", "AKT2", "TRAF2", "PIK3CB", "CASP7")
174	KEGG_CYTOKINE_CYTOKINE_RECEPTOR_INTERACTION	0.0263169	0.188267	0.352488	-0.398329	-1.4773	83	c("INHBE", "INHBA", "CCR5", "LTB", "FAS", "CXCL10", "CXCL12", "IL11RA", "CCL8", "IL1B", "IL10RA", "CD40", "EDA2R", "IL2RG", "CCL5", "CSF3R", "VEGFB", "CSF1", "RELT", "IL13RA1", "INHBC", "GHR", "IL18", "TNFRSF14")
175	KEGG_CHEMOKINE_SIGNALING_PATHWAY	0.0197685	0.167427	0.352488	-0.381823	-1.48459	106	c("AKT3", "CCR5", "STAT2", "GNAI1", "CXCL10", "FGR", "CXCL12", "CCL8", "PLCB2", "ADCY5", "PIK3CG", "PAK1", "STAT1", "PIK3CD", "CCL5", "PREX1", "GNGT2", "GRK3", "NFKB1", "GNB4", "IKBKG", "RAC2")
176	KEGG_PRIMARY_BILE_ACID_BIOSYNTHESIS	0.0669291	0.325386	0.245042	-0.605342	-1.50506	12	c("CYP7A1", "AKR1D1", "BAAT", "CYP7B1")
177	KEGG_TAURINE_AND_HYPOTAURINE_METABOLISM	0.0339018	0.217439	0.321776	-0.859558	-1.57403	4	c("CSAD", "BAAT")
178	KEGG_TYPE_I_DIABETES_MELLITUS	0.0148135	0.154885	0.38073	-0.845082	-1.64362	5	c("FAS", "IL1B", "CD80")
179	KEGG_NEUROACTIVE_LIGAND_RECEPTOR_INTERACTION	0.0128528	0.154709	0.38073	-0.47161	-1.6464	56	c("FPR1", "P2RY4", "LPAR6", "S1PR1", "HTR1D", "PTGER4", "P2RX6", "CNR2", "THRB", "GALR1", "GPR35", "ADRB2", "ADRA1B", "APLNR", "GZMA", "CHRNA3", "GHR", "PTAFR", "GABRG1")
180	KEGG_COMPLEMENT_AND_COAGULATION_CASCADES	0.00993007	0.153916	0.38073	-0.486508	-1.65139	48	c("SERPINA5", "FGG", "CFD", "FGB", "MBL2", "FGA", "C8A", "F8", "C4B", "KLKB1", "C9")
181	KEGG_INTESTINAL_IMMUNE_NETWORK_FOR_IGA_PRODUCTION	0.0133083	0.154709	0.38073	-0.733404	-1.6621	9	c("ITGA4", "CXCL12", "CD80", "CD40")
182	KEGG_ALLOGRAFT_REJECTION	0.00334207	0.103604	0.431708	-0.939712	-1.72081	4	c("FAS", "CD80", "CD40")
183	KEGG_GRAFT_VERSUS_HOST_DISEASE	0.00258334	0.0961003	0.431708	-0.943542	-1.72782	4	c("FAS", "IL1B", "CD80")
184	KEGG_CYTOSOLIC_DNA_SENSING_PATHWAY	0.0121818	0.154709	0.38073	-0.568964	-1.72817	29	c("IRF7", "CASP1", "CXCL10", "IL1B", "CCL5", "NFKB1", "IKBKG", "POLR3K", "MAVS", "ADAR", "IL18", "PYCARD", "RIPK1", "POLR3B")
185	KEGG_PRIMARY_IMMUNODEFICIENCY	0.00906504	0.153282	0.38073	-0.705031	-1.7855	13	c("CIITA", "PTPRC", "BTK", "CD40", "IL2RG", "IKBKG", "TAP1", "JAK3")
186	KEGG_TERPENOID_BACKBONE_BIOSYNTHESIS	1.6016e-05	0.00297898	0.57561	-0.862498	-2.14442	12	c("IDI1", "HMGCS1", "MVD", "FDPS", "HMGCR")

## Sheet: Dehnel_vs_Hibernation
Count	GeneName	Dehnel_padj	Dehnel_LFC	Hibernation_FDR	Hibernation_LFC
1	CA2	5.39719e-09	1.55067	0.00885947	0.926597
2	ETNPPL	4.34642e-07	1.35293	2.25241e-07	1.69853
3	GPD2	0.000266591	1.23621	0.0177948	0.7372
4	ALDH1B1	0.00319245	0.810292	0.0334114	0.616654
5	MPV17L	0.00525222	0.93115	0.000323814	1.12017
6	FZD4	0.0156612	0.694984	0.00477997	0.723562
7	GPI	0.0201396	0.596342	0.00152274	0.778616
8	PAH	0.0297706	0.652278	0.0425977	0.565842
9	ACY1	0.04442	0.745747	0.0387723	0.521108
10	JCHAIN	1.51105e-12	4.74196	9.96809e-05	-1.4528
11	LIN7A	2.73466e-11	3.28213	0.00247978	-0.813034
12	MZB1	6.07621e-05	2.75087	6.23444e-05	-1.41341
13	ALDH8A1	0.00354563	0.634084	0.0136458	-0.620075
14	RASGRP3	0.00363943	1.5319	0.000523394	-0.827194
15	ABCB11	0.0159845	0.713553	0.0436714	-0.594849
16	FABP3	0.0263921	1.23351	0.0312199	-1.11963
17	RAP1GAP2	0.0492175	0.656389	0.0022062	-1.02467
18	GAA	2.47955e-06	-0.687117	0.00996511	0.585985
19	FEZ1	0.000727521	-1.51318	0.000617611	1.48744
20	MMP15	0.000727521	-0.949182	0.0404484	0.525635
21	CD14	0.00297177	-1.35435	0.00453696	0.945692
22	SORBS3	0.0106341	-0.694323	0.00773688	0.710012
23	BTG2	0.0183134	-1.32027	0.0369379	1.23472
24	REEP4	0.0223483	-0.79295	1.69508e-05	1.12381
25	ATG16L2	0.0358518	-1.29613	0.0465488	0.573913
26	APOA1	0.0377053	-0.444133	0.0393789	0.609308
27	HNRNPL	0.0410279	-0.501927	0.00376513	0.673823
28	SLC1A4	0.0477276	-0.854489	0.000632152	1.44176
29	NUDT19	1.04205e-05	-0.989105	0.0347618	-0.53401
30	SIX5	3.40175e-05	-1.51347	0.0230588	-0.67669
31	TMEM64	5.18483e-05	-1.8723	0.0169676	-0.722603
32	INHBE	0.000866251	-3.1193	3.17564e-06	-1.84313
33	MBL2	0.00150457	-0.866627	0.0345484	-0.782847
34	SREBF2	0.00494666	-0.969424	0.0230261	-0.523194
35	ZNF467	0.00546496	-1.30437	2.89468e-05	-0.87099
36	ADAMTS4	0.00577204	-1.46773	9.73207e-05	-1.3419
37	CYTH4	0.00682168	-1.09012	0.000192208	-0.99271
38	INSIG1	0.00927589	-1.13396	0.00147054	-1.14329
39	INHBA	0.0107845	-1.84558	6.84736e-07	-1.41179
40	NSDHL	0.0196662	-1.23347	0.0019193	-0.766837
41	MVD	0.0217929	-1.75674	0.0334114	-0.855166
42	BAAT	0.0229052	-0.865923	0.0437952	-0.577866
43	UBE2L6	0.0256938	-1.56907	0.0214607	-1.51426
44	TBC1D8	0.0320989	-0.717463	0.0141511	-0.756158
45	IDI1	0.0406224	-1.99296	2.56885e-11	-2.02739
46	THRB	0.0412888	-1.50665	0.0157482	-0.582943
47	CSAD	0.0415825	-0.898491	0.0158757	-0.655586
48	SULT1B1	0.0465612	-1.13375	0.00889268	-0.627598
49	FDPS	0.047369	-1.14959	0.00593854	-0.79815
50	PPP1R10	0.0495277	-0.579255	1.8705e-11	-2.21273
