# Supplementary material for: Dynamic metabolic and molecular changes during seasonal shrinking in Sorex araneus
Source: HighWire-hosted journal article supplement (doi:10.1101/gr.280639.125), 2025-11-04
Supplement: Supplemental_Data.zip [file Supplemental_Data_S9.xlsx]

## Sheet: WinterJuvenile.vs.SpringAdult
-LOG(P-value)	Difference	Protein IDs	Gene IDs	Direction
0.713399	-0.638244	NP_001267607.1	TTR	-
0.810505	-1.21142	XP_004600167.1	GDA	-
0.296997	-0.315693	XP_004600176.2	TJP2	-
0.70571	-0.450471	XP_004600193.1	AK3	-
1.25396	-0.669255	XP_004600231.1	RPS6	-
0.604642	-0.230465	XP_004600246.1	NDUFB6	-
0.695633	0.578382	XP_004600271.1	VCP	+
0.663408	-0.791143	XP_004600273.1	STOML2	-
0.378751	0.87122	XP_004600278.1	TPM2	+
0.28113	0.469547	XP_004600282.1	TLN1	+
2.38409	-0.716827	XP_004600287.2	HINT2	-
0.465847	-0.240812	XP_004600295.1	CLTA	-
0.105319	0.0816093	XP_004600303.1	GRHPR	+
0.129832	-0.226159	XP_004600311.1	NANS	-
1.4411	1.30942	XP_004600326.2	BAAT	+
0.437531	0.291685	XP_054998835.1	ALDOB	+
0.413929	0.33782	XP_004600333.2	NIPSNAP3A	+
1.22812	-0.382175	XP_004600342.1	RAD23B	-
0.728388	-0.301136	XP_004600349.1	TXN	-
0.305732	-0.24212	XP_004600490.2	SEC61B	-
1.67397	-1.41664	XP_004600540.1	CHMP1A	-
1.03771	0.369152	XP_004600544.1	APRT	+
0.120041	-0.143795	XP_004600557.1	COTL1	-
0.0299332	-0.0862038	XP_004600582.1	GLG1	-
0.604914	-0.379008	XP_004600610.2	IST1	-
1.01203	0.825051	XP_004600685.1	GOT2	+
0.0634875	0.103856	XP_004600748.2	GPT2	+
0.00244166	-0.00244942	XP_004600769.1	GPI	-
0.0649319	0.0992409	XP_004600814.2	PSMD8	+
0.265715	-0.197307	XP_055001821.1	CES2	-
0.475625	-0.773686	XP_004601105.1	PPP1R14A	-
1.92383	1.28559	XP_004601125.1	RNASET2	+
0.718595	-0.646391	XP_004601199.2	SSB	-
0.19469	0.263251	XP_054979003.1	OLA1	+
2.41567	-1.7399	XP_004601297.1	SF3B1	-
1.73026	-0.472008	XP_004601327.1	NDUFB3	-
0.843738	0.807765	XP_004601359.2	NDUFS1	+
0.0396469	0.0390415	XP_004601371.1	IDH1	+
0.825782	0.91266	XP_004601385.2	CPS1	+
0.0565223	0.398862	XP_004601453.2	CAVIN2	+
0.260703	-0.147103	XP_054976933.1	FN1	-
1.9982	1.50881	XP_004601491.2	PECR	+
0.0140292	0.0415081	XP_004601513.1	GPD1	+
0.766972	1.01779	XP_004601566.1	KRT8	+
0.183862	-0.342179	XP_004601577.1	PFDN5	-
0.123247	0.214902	XP_004601592.1	PCBP2	+
0.191472	-0.376836	XP_004601617.1	HNRNPA1	-
1.73406	-0.598462	XP_004601642.1	SARNP	-
0.28855	-0.173321	XP_054982393.1	CNPY2	-
0.255615	0.627073	XP_054983077.1	GLS2	+
0.740168	0.303478	XP_004601674.1	ATP5F1B	+
0.732524	-0.408107	XP_054984607.1	NACA	-
0.0810711	0.112259	XP_004601688.1	SHMT2	+
0.189304	-0.175322	XP_004601699.1	DCTN2	-
0.0413338	0.0505547	XP_004601758.2	LMAN1	+
2.08864	1.49157	XP_054987346.1	PYGL	+
1.49058	-1.2073	XP_004601796.1	RTRAF	-
0.0548497	-0.0919674	XP_004601800.1	PSMC6	-
0.404417	-0.237465	XP_004601811.2	GMFB	-
1.17791	-0.920388	XP_054989376.1	TIMM9	-
1.77573	0.50184	XP_054982465.1	SUOX	+
0.587049	-0.284627	XP_004601984.2	RPS26	-
1.23688	-1.51009	XP_004602010.2	OS9	-
2.72689	-1.23449	XP_004602080.1	TMED4	-
1.26559	1.61356	XP_004602117.3	AASS	+
0.553573	0.351173	XP_004602158.1	DLD	+
0.177691	-0.353057	XP_004602171.1	NAMPT	-
0.451187	0.345362	XP_004602183.1	PSMC2	+
0.71303	0.89097	XP_054977770.1	CD36	+
3.27485	-1.35647	XP_054990928.1	CROT	-
0.826627	-1.16223	XP_004602251.1	PON1	-
0.505954	0.573811	XP_004602252.2	PON3	+
0.609521	0.639206	XP_054975711.1	SLC25A13	+
1.06458	0.394294	XP_004602362.1	FBP1	+
0.801119	0.605286	XP_004602370.2	FTCD	+
1.26456	-1.3298	XP_004602371.2	COL6A2	-
0.403786	-0.32398	XP_004602380.1	CSTB	-
0.463369	-0.420058	XP_004602384.1	NDUFV3	-
0.0763478	-0.112945	XP_004602419.1	CA3	-
0.421469	0.740261	XP_004602423.1	CHMP4C	+
0.087722	-0.11469	XP_004602457.2	LACTB2	-
1.58191	-1.31194	XP_004602468.2	COPS5	-
0.308292	0.704044	XP_004602475.1	ADHFE1	+
1.90972	-1.41165	XP_004602476.2	RRS1	-
0.0703657	-0.148604	XP_004602483.2	TTPA	-
0.13723	-0.172321	XP_004602484.1	GGH	-
0.853638	0.647152	XP_004602544.1	GATD3	+
0.774189	-1.08	XP_004602718.1	CCT2	-
0.666643	-0.934314	XP_054974321.1	DCN	-
0.412594	-0.669497	XP_004602803.1	NDUFA12	-
0.0945959	0.311598	XP_004602806.1	METAP2	+
0.69295	0.731218	XP_004602810.2	AMDHD1	+
0.600725	0.601973	XP_004602835.1	PAH	+
2.22332	-1.1691	XP_004602884.1	LUM	-
0.601071	-1.8293	XP_054974211.1	WASHC3	-
0.328107	-0.214184	XP_004602940.1	TOLLIP	-
0.568141	-0.579014	XP_004602963.1	SSR3	-
0.507478	-1.05572	XP_004602996.1	RBP1	-
0.267268	0.654713	XP_004603013.2	PCCB	+
0.61387	-0.675731	XP_004603046.2	OPA1	-
0.0133239	0.044883	XP_004603080.1	EIF4A2	+
1.10943	-0.755888	XP_004603082.1	DNAJB11	-
0.447731	0.881835	XP_004603094.2	EHHADH	+
1.34693	1.30836	XP_004603109.2	PSMD2	+
3.32215	1.8049	XP_004603161.2	NCEH1	+
0.463405	0.898289	XP_004603270.1	COPB2	+
0.437465	-0.436997	XP_004603296.2	PPP1R2	-
0.115194	-0.111953	XP_004603362.3	SELENOF	-
0.41646	-0.621206	XP_004603374.1	MCOLN2	-
0.895364	0.506741	XP_004603396.1	ACADM	+
0.106736	-0.254184	XP_054996574.1	CRYZ	-
0.538288	0.554946	XP_004603444.1	AKR7A2	+
0.778178	0.711415	XP_004603454.2	DDOST	+
0.489772	-0.37972	XP_004603479.1	HNRNPR	-
0.666507	-0.564793	XP_004603488.1	RPL11	-
0.300784	-0.133838	XP_004603493.2	HMGCL	-
0.496803	-0.623771	XP_004603510.1	CLIC4	-
0.704401	-0.330806	XP_004603524.3	SH3BGRL3	-
0.404338	-1.19138	XP_004603536.1	SFN	-
0.867257	-0.377839	XP_004603539.1	NUDC	-
0.0335396	-0.0297977	XP_004603558.1	STX12	-
0.183981	-0.227031	XP_004603566.1	DNAJC8	-
0.1102	0.495076	XP_004603567.2	ATP5IF1	+
1.69827	-1.73591	XP_054996306.1	RCC1	-
0.465184	0.724952	XP_004603711.2	AGMAT	+
0.66418	0.567734	XP_004603727.2	ALDH4A1	+
0.0369763	-0.0714249	XP_054996824.1	MECR	-
0.973306	0.633105	XP_004603850.1	UROC1	+
0.416108	-0.516101	XP_004603868.1	HACL1	-
0.148194	-0.387342	XP_004603898.2	CMC1	-
0.617954	0.252903	XP_004604114.1	HIBADH	+
1.29483	2.60712	XP_004604156.2	ACSM1	+
0.992875	-0.729708	XP_004604162.1	CRYM	-
0.576442	-0.944382	XP_004604193.1	CARHSP1	-
0.168545	0.183047	XP_054992802.1	ABAT	+
0.863416	-0.330057	XP_004604245.1	NDUFB10	-
0.262284	-0.15046	XP_004604246.1	RPS2	-
0.211756	0.129613	XP_054991438.1	HAGH	+
0.86334	-0.727454	XP_004604390.2	RSL1D1	-
1.67977	-0.391937	XP_004604455.1	ECI1	-
2.52499	-2.31234	XP_054991448.1	NHERF2	-
0.22682	-0.312645	XP_004604505.2	MRPL28	-
0.000323401	0.000863647	XP_004604573.1	POSTN	+
0.573111	0.348505	XP_004604597.2	HSPH1	+
1.64171	-0.824972	XP_004604611.2	URAD	-
0.274053	0.358147	XP_004604617.1	RPL21	+
1.07049	1.6853	XP_004604627.1	SUCLA2	+
0.0810209	0.0905724	XP_004604630.1	ESD	+
1.05899	-1.07572	XP_054994287.1	LCP1	-
1.37622	-2.46249	XP_004604748.1	TIMM8B	-
0.0737497	0.0799023	XP_004604752.1	PTS	+
0.254938	0.517022	XP_004604763.2	NNMT	+
0.752886	-0.354586	XP_004604771.1	TAGLN	-
0.278428	0.211614	XP_004604781.1	ATP5MG	+
0.252329	-0.119973	XP_004604782.2	TTC36	-
0.678393	-0.361682	XP_004604795.1	RPS25	-
0.615962	-0.262192	XP_004604817.1	HSPA8	-
0.177222	0.205283	XP_004604886.1	C3H11orf54	+
0.659638	-0.342055	XP_054987780.1	RPL26	-
0.010718	-0.00970192	XP_004604920.1	EIF4A1	-
0.387675	0.207719	XP_004604939.1	EIF5A	+
0.0576026	-0.0335918	XP_004604979.1	PSMB6	-
1.0815	-0.541374	XP_004605001.2	C1QBP	-
0.00394993	-0.00807571	XP_004605044.1	CRK	-
1.27571	-0.388587	XP_004605045.1	YWHAE	-
3.2773	-2.12923	XP_004605080.1	SDF2	-
0.522125	-0.402168	XP_004605120.1	APOA1	-
0.317845	-0.462283	XP_054987948.1	SAT2	-
1.02962	-0.585607	XP_004605266.1	ASGR1	-
0.232556	-0.143022	XP_004605284.2	TXNDC17	-
0.18863	0.220306	XP_004605366.2	ITIH2	+
0.560847	0.754827	XP_004605395.2	PTER	+
1.03285	-0.971732	XP_004605401.1	VIM	-
0.174953	0.306548	XP_055003430.1	ABI1	+
1.17591	-1.00645	XP_004605484.1	PARP1	-
2.14441	-0.73199	XP_004605498.1	HNRNPU	-
1.3036	2.08836	XP_004605590.2	SELENOP	+
0.693018	-0.998336	XP_004605597.2	DAB2	-
0.0266804	-0.0436405	XP_004605615.2	AMACR	-
0.289023	0.192747	XP_004605621.1	SUB1	+
0.551825	-0.998078	XP_054990726.1	SYNCRIP	-
0.298246	0.567544	XP_004605764.1	SNX3	+
0.131179	-0.162844	XP_004605813.2	TSTD3	-
0.769902	-1.20552	XP_054993132.1	MTRES1	-
0.315845	-0.531209	XP_004605851.2	TOMM6	-
0.348321	0.680552	XP_004605859.1	CNPY3	+
0.532347	0.331663	XP_004605860.2	GNMT	+
0.181663	0.154222	XP_054990908.1	HSP90AB1	+
0.508064	0.970877	XP_004605903.2	MMUT	+
0.685707	0.383337	XP_004621396.1	RPS4X	+
0.132084	-0.167439	XP_004605964.1	TMEM30A	-
1.09848	-1.96553	XP_054992619.1	RPL7L1	-
2.04809	-1.11434	XP_004605985.2	MRPL2	-
0.160777	0.208554	XP_004606069.1	SNRPD1	+
0.867454	0.263603	XP_004606154.1	ATP5F1A	+
0.00580557	0.0142544	XP_004606183.2	DSG2	+
0.0319797	-0.0726921	XP_004606206.2	PPID	-
0.789607	1.25357	XP_004606207.2	ETFDH	+
0.545383	0.402427	XP_004606216.1	TDO2	+
0.48507	0.324933	XP_004606226.2	FGG	+
0.396424	-0.196653	XP_004606239.1	RPS3A	-
0.453587	0.317009	XP_004606303.2	FGA	+
0.924841	-0.574656	XP_004606415.2	AIFM1	-
0.100339	0.0604675	XP_004606530.1	HSD17B10	+
3.18326	-0.434126	XP_004606567.1	SSR4	-
0.113709	0.142018	XP_004606577.1	BGN	+
0.381682	-0.44375	XP_004606612.1	MMGT1	-
0.268961	0.272638	XP_004606733.1	MIX23	+
0.34173	0.271624	XP_004606749.1	HGD	+
1.4749	-0.951454	XP_004606750.1	NDUFB4	-
0.467245	-0.783422	XP_004606772.1	ATP6V1A	-
0.578566	0.430647	XP_004606798.1	RPL24	+
0.02662	-0.051009	XP_054982998.1	TFG	-
0.00173998	0.00264626	XP_004606805.2	TOMM70	+
0.113691	-0.150565	XP_004606943.1	SEPTIN7	-
0.724104	-0.704659	XP_004606970.2	INMT	-
0.228306	0.338574	XP_004606996.2	PLPBP	+
0.793237	0.499916	XP_004607006.2	GSR	+
0.659346	-0.540582	XP_004607054.1	CHMP2B	-
0.087143	0.0508358	XP_004607114.1	ENO1	+
0.982304	-0.748617	XP_004607139.1	SERBP1	-
0.318935	-0.51707	XP_004607175.1	MAGOH	-
0.853055	1.3425	XP_004607176.2	CPT2	+
0.572518	-0.291462	XP_004607184.1	BTF3L4	-
0.52773	-0.39624	XP_004607185.2	TXNDC12	-
0.513946	0.750173	XP_054996330.1	FGGY	+
0.874931	0.926781	XP_004607415.1	RBP4	+
0.699488	0.629564	XP_004607487.2	MAT1A	+
0.133906	-0.096241	XP_004607492.1	UPB1	-
0.488924	-0.374414	XP_004607495.1	SNRPD3	-
0.939623	-0.427022	XP_004607496.1	GGT1	-
0.763767	-0.465225	XP_004607497.1	DDT	-
1.23854	-0.822903	XP_004607500.1	MIF	-
2.53063	-1.5792	XP_004607510.2	SDF2L1	-
1.81999	-1.05168	XP_004607530.1	MRPL40	-
0.0271048	0.0525536	XP_004607542.1	RANBP1	+
0.922178	1.5066	XP_054975466.1	PRODH	+
0.425929	-0.262563	XP_004607579.1	CISD1	-
0.0151924	0.037394	XP_004607683.2	MBL2	+
1.49512	-0.728836	XP_004607685.1	TFAM	-
0.0852669	0.0542793	XP_004607690.1	NDUFB9	+
0.043673	-0.163278	XP_004607693.2	ANXA13	-
0.0652229	-0.0560089	XP_004607727.1	EMC2	-
0.875302	-1.31047	XP_054981082.1	NCALD	-
0.0438674	-0.106335	XP_004607758.1	NAPA	-
0.98171	-0.692036	XP_004607764.1	SAE1	-
1.05687	-0.36694	XP_004607785.2	SNRPD2	-
0.71673	-1.09121	XP_004607883.1	APOC2	-
0.0473461	-0.0596767	XP_004607885.1	APOC1	-
0.16605	-0.2871	XP_004607916.1	LIN7C	-
1.73272	-0.520872	XP_004607947.1	CAT	-
0.606332	-1.12462	XP_004607959.2	CD44	-
0.720852	-1.8459	XP_004607974.1	API5	-
0.65235	0.579691	XP_004607978.1	HSD17B12	+
0.124283	0.174189	XP_004608030.2	PDHX	+
0.328958	-0.310006	XP_004608046.2	OCIAD1	-
0.00659654	-0.00559311	XP_004608074.1	UGDH	-
0.535579	-0.313583	XP_004608161.2	ITGB6	-
0.143982	-0.180419	XP_004608207.1	RALB	-
0.453393	-0.216206	XP_004608214.1	DBI	-
0.88932	0.890562	XP_004608216.2	STEAP3	+
0.0811148	0.168828	XP_004608264.2	GSTK1	+
0.0373378	-0.053764	XP_004608277.1	NDUFB2	-
0.417531	-0.392591	XP_004608289.2	AKR1D1	-
0.595199	-0.552158	XP_004608294.1	MTPN	-
0.141659	-0.380635	XP_004608305.1	BPGM	-
0.71368	-0.64199	XP_004608330.1	ATP6V1F	-
0.0999816	-0.259961	XP_004608344.1	SND1	-
0.40435	-0.422457	XP_004608537.2	TRIM23	-
1.69163	-0.943812	XP_004608552.1	MRPS36	-
0.421199	-0.164701	XP_004608568.2	BTF3	-
0.446605	-0.47015	XP_004608625.1	PSMD11	-
0.489067	1.76267	XP_004608633.2	ZNF830	+
0.0240594	-0.0203457	XP_004608655.2	DHRS11	-
0.8175	1.66907	XP_004608674.1	CLTC	+
0.00204501	0.0031147	XP_004608700.2	SCPEP1	+
0.0823943	0.221134	XP_004608727.1	COL1A1	+
0.676793	-0.197733	XP_054987635.1	PHB1	-
0.407893	-0.56187	XP_004608760.1	CBX1	-
0.529975	-0.562503	XP_054988309.1	SCRN2	-
0.437115	0.57021	XP_004608769.1	KPNB1	+
0.80606	-0.405201	XP_004608777.1	RPL23	-
0.313848	-0.194359	XP_004608778.1	LASP1	-
1.02603	-0.639563	XP_004608793.1	MIEN1	-
0.0281491	0.0459339	XP_004608824.1	EIF1	+
0.562618	-0.306833	XP_054989516.1	RAB5C	-
0.0661965	0.126735	XP_004608845.2	CAVIN1	+
0.00587629	-0.0161179	XP_004608867.1	PSME3	-
0.600724	-0.413139	XP_004608876.1	RPL27	-
0.231022	-0.391623	XP_004608877.1	VAT1	-
0.453395	-0.638507	XP_004608922.2	CA4	-
0.818963	0.841091	XP_004608972.2	PNPO	+
0.265829	0.989116	XP_004609013.2	KRT9	+
0.534557	0.731393	XP_004609026.2	NAGLU	+
0.474263	0.304333	XP_004609072.1	ALDH8A1	+
0.265968	-0.123627	XP_004609095.1	ARG1	-
0.548045	-0.892454	XP_004609098.1	AKAP7	-
1.04635	1.36469	XP_004609149.1	ENPP3	+
0.0283751	0.0682045	XP_004609163.1	CCT7	+
0.0870282	0.040345	XP_004609172.1	SPR	+
0.262757	-0.156159	XP_004609196.1	FAM136A	-
1.22309	-1.49109	XP_054976948.1	SNRPG	-
1.19901	-0.395587	XP_004609202.1	PCBP1	-
0.362907	-0.590427	XP_054977913.1	ANXA4	-
0.0444071	-0.0352562	XP_004609244.1	MDH1	-
0.359868	-0.392439	XP_004609381.2	PTRHD1	-
0.262409	-0.27991	XP_054977482.1	IAH1	-
0.658236	-0.536601	XP_004609498.1	NEDD8	-
0.255671	0.328126	XP_004609505.1	PSME2	+
1.18523	-0.42806	XP_004609507.1	PSME1	-
0.768841	1.30068	XP_004609529.1	PSMB5	+
0.0127432	0.0214466	XP_004609544.1	DAD1	+
1.31783	-0.781634	XP_054987046.1	APEX1	-
0.681556	-0.731775	XP_004609620.1	SRP14	-
0.126109	-0.120192	XP_004609624.1	IVD	-
1.43548	0.806755	XP_004609630.1	GCHFR	+
0.669274	-0.271107	XP_004609641.1	CHP1	-
0.425396	-0.174431	XP_004609655.1	SNAP23	-
1.1396	-3.17827	XP_004609660.1	UBR1	-
0.689142	-0.35858	XP_004609672.2	PDIA3	-
0.352445	-0.37611	XP_004609676.1	HYPK	-
0.604503	-0.423102	XP_004609683.1	EIF3J	-
0.215704	0.286773	XP_004609696.1	BLOC1S6	+
0.211281	0.309027	XP_004609729.2	MDP1	+
1.628	1.46668	XP_004609830.2	RMDN3	+
1.01558	-0.489631	XP_004609852.2	B2M	-
1.22063	-0.961609	XP_004609855.1	SORD	-
0.326703	0.172175	XP_004609862.2	HSD17B4	+
0.0848972	0.107893	XP_004609869.1	SNX2	+
0.203349	0.0921818	XP_004609877.3	ALDH7A1	+
2.5495	-0.961758	XP_004609879.1	LMNB1	-
1.12215	0.476578	XP_004609917.1	HSPA4	+
0.604562	-0.254371	XP_054998674.1	VDAC1	-
0.315274	-0.26413	XP_004609922.1	SKP1	-
0.990911	1.02622	XP_054999508.1	PPP2CB	+
0.315286	-0.168095	XP_004609926.1	SAR1B	-
2.02174	-1.35016	XP_004609938.2	TGFBI	-
2.00222	-2.68822	XP_004609968.1	MATR3	-
0.51741	-1.05669	XP_004609970.1	PAIP2	-
1.33229	-0.773735	XP_054998402.1	PFDN1	-
1.52449	-0.520756	XP_004609989.1	NDUFA2	-
0.517811	-0.402643	XP_004610046.2	MZB1	-
0.353314	0.567271	XP_004610104.1	SNRPE	+
0.234224	-0.156757	XP_004610274.1	TMED10	-
0.011472	-0.0114319	XP_055001860.1	CALM3	-
0.0482576	0.0508244	XP_004610392.1	ASAH1	+
0.360338	-0.747694	XP_004610403.2	SORBS2	-
0.0518655	0.0905556	XP_004610414.1	SLC25A4	+
0.990886	1.36905	XP_054992148.1	ACSL1	+
0.265605	0.449488	XP_004610439.1	AADAT	+
0.712259	1.30542	XP_004610502.2	NDUFA9	+
0.113719	-0.0418167	XP_004610510.1	GAPDH	-
1.43002	-0.630502	XP_004610542.1	HMOX1	-
0.199142	0.538305	XP_004610546.1	MB	+
0.115718	0.11809	XP_004610575.2	RPL3	+
0.306707	-0.420724	XP_004610588.1	ST13	-
0.717248	0.679403	XP_054999165.1	ACO2	+
0.334758	-0.402563	XP_004610606.1	NDUFA6	-
0.6802	-0.472446	XP_004610615.1	PACSIN2	-
0.0452438	-0.0982265	XP_004610631.1	TTC38	-
0.390399	-0.311829	XP_004610718.2	M6PR	-
1.38586	-2.43146	XP_004610737.1	TXN2	-
0.525076	-1.17389	XP_054997154.1	LGALS2	-
0.404675	-0.508994	XP_004610784.1	CCDC134	-
0.335497	0.575055	XP_004610788.1	NAGA	+
0.700596	0.539951	XP_054999394.1	CRELD2	+
0.365433	-0.205096	XP_004610837.1	TYMP	-
2.11479	1.72127	XP_004610884.1	SERPINH1	+
0.253158	0.213714	XP_004610991.1	HAO1	+
0.313893	-0.287429	XP_004611010.2	DDRGK1	-
0.454929	-0.38687	XP_004611071.1	PGAM5	-
0.446135	-0.671429	XP_004611094.2	PSMD9	-
1.4661	0.352291	XP_004611096.2	HPD	+
0.0760878	0.147138	XP_004611109.1	VPS29	+
1.69905	-0.882671	XP_004611117.1	RPL6	-
0.105719	-0.122208	XP_004611126.1	PEBP1	-
0.0556447	-0.0436298	XP_004611131.1	RPLP0	-
0.121675	0.185347	XP_004611143.1	MLEC	+
0.29679	0.406548	XP_004611359.1	PLBD1	+
0.0811526	0.136363	XP_004611430.2	HEBP1	+
0.0422527	0.0435272	XP_004611498.2	NOP16	+
0.773952	-0.408971	XP_054985330.1	ARF1	-
0.347801	0.399833	XP_004611645.2	GPX3	+
1.261	-0.586445	XP_004611682.1	GUK1	-
0.255987	-0.163638	XP_004611693.2	PGK1	-
0.188254	-0.257468	XP_004611709.1	CSTF2	-
1.19663	-0.530185	XP_004611716.1	TIMM8A	-
0.752896	0.8202	XP_004611747.2	GLA	+
0.917216	-0.393047	XP_004611760.2	PPIB	-
0.503546	-0.322426	XP_004611766.1	RPLP1	-
0.151358	0.297083	XP_054986708.1	PKM	+
0.485331	0.215089	XP_004611814.2	ETFA	+
0.198963	-0.121539	XP_004611818.2	PSMA4	-
0.520068	-0.250291	XP_054989196.1	TMOD3	-
0.265294	0.301546	XP_004611839.2	SLC27A2	+
0.373421	-0.200981	XP_004611854.1	NDUFV2	-
0.696224	0.335575	XP_004611946.2	PRDX3	+
0.111485	0.121416	XP_054974915.1	ACSL5	+
0.850956	1.47572	XP_004612073.2	SUCLG1	+
0.935672	1.24912	XP_004612100.1	FABP1	+
2.48595	-1.03144	XP_004612144.1	VAMP8	-
0.596406	0.732498	XP_004612166.1	DTD2	+
0.814283	-0.466999	XP_004612206.1	FKBP3	-
0.0415322	-0.070483	XP_004612244.1	TMSB4X	-
1.31064	0.923519	XP_004612283.1	PDHA1	+
0.0431434	-0.147236	XP_054986714.1	NUMB	-
0.860347	-0.323869	XP_004612370.1	SYNJ2BP	-
1.68235	-0.555535	XP_004612384.1	ERH	-
0.551838	0.743387	XP_004612420.1	MTHFD1	+
1.03813	-1.35159	XP_054996877.1	CHD6	-
0.386416	0.73773	XP_004612557.1	RPN2	+
0.0774739	-0.0985302	XP_004612566.1	MYL9	-
0.0094626	0.0129307	XP_004612596.1	EIF6	+
0.7483	0.362835	XP_004612614.1	AHCY	+
0.36784	-0.456579	XP_004612616.1	EIF2S2	-
0.133715	-0.277673	XP_054995509.1	RALY	-
0.449065	0.378771	XP_004612619.1	CHMP4B	+
0.465749	0.718016	XP_004612653.1	HM13	+
0.331459	-0.322515	XP_004612756.2	AIMP1	-
1.1508	0.664925	XP_004612841.2	SUCLG2	+
0.306273	0.693521	XP_004612891.1	SHMT1	+
0.18966	0.12673	XP_004612975.1	OTC	+
2.19882	-0.764081	XP_004612991.1	NDUFB11	-
0.468582	-0.311803	XP_054977987.1	RGN	-
0.273029	-0.226439	XP_004612999.2	MAOA	-
0.10053	-0.106347	XP_004613012.1	ALDH1A1	-
0.698037	-0.887931	XP_004613015.1	ANXA1	-
0.267769	-0.232891	XP_004613017.2	OSTF1	-
0.110156	0.225203	XP_004613070.2	EPRS1	+
0.689003	-1.11412	XP_004613071.2	BPNT1	-
0.0647759	0.0648129	XP_004613115.2	MTARC2	+
0.0929539	0.202657	XP_004613151.1	SRP19	+
0.559736	-0.520027	XP_004613177.1	LSM3	-
0.751702	0.917079	XP_004613255.2	ACAD9	+
0.724547	0.897237	XP_004613271.1	DMGDH	+
0.987878	-1.08603	XP_004613291.1	MRPL41	-
1.13961	-0.725315	XP_004613388.1	RPL35	-
0.375123	0.756404	XP_004613477.2	SARDH	+
1.14286	-0.479071	XP_004613554.1	RPL12	-
0.0980499	-0.131927	XP_004613621.2	NDUFA8	-
0.379392	-0.220937	XP_054997260.1	NUCB2	-
0.202832	0.110937	XP_004613637.1	PSMA1	+
0.161587	0.481549	XP_004613808.2	NDUFS2	+
1.32845	-1.35359	XP_004613809.1	UFC1	-
1.46453	-0.906474	XP_004613813.1	F11R	-
0.0252037	0.0637535	XP_004613820.1	NCSTN	+
1.5346	-0.473851	XP_004613830.1	TAGLN2	-
1.33363	-1.00913	XP_004613899.1	DPT	-
0.845473	-0.313763	XP_004613931.2	ALDH9A1	-
0.726163	-1.01344	XP_004613932.2	MGST3	-
0.785462	-1.04014	XP_054978685.1	APOA2	-
0.45996	-0.999797	XP_004613953.1	FCER1G	-
0.398603	-0.170303	XP_054996304.1	RPS27	-
0.863692	-1.10272	XP_004614067.1	RWDD1	-
0.67872	0.643361	XP_054975950.1	GGACT	+
0.612296	-0.847235	XP_004614109.1	ARGLU1	-
0.798751	0.771139	XP_004614165.2	SRPRA	+
1.06937	1.30932	XP_004614194.2	ACAD8	+
0.856253	0.508867	XP_004614239.2	HYI	+
0.162322	-0.215645	XP_004614275.1	PPT1	-
1.20979	0.827563	XP_054994536.1	CAP1	+
0.644092	-0.33712	XP_054996862.1	NDUFS5	-
3.40236	-0.75495	XP_004614289.3	MYCBP	-
0.408144	-0.220026	XP_004614314.1	PSMB2	-
0.901845	-0.267925	XP_054996569.1	AK2	-
0.798207	-0.817988	XP_004614459.1	SNX5	-
0.109075	0.082613	XP_004614519.1	SLC25A5	+
1.22455	-0.692698	XP_004614520.2	PGRMC1	-
0.475844	-0.635033	XP_004614532.1	PLS3	-
0.253121	-0.20724	XP_004614607.1	RPL14	-
0.122805	0.137581	XP_004614628.1	ACAA1	+
0.0842035	-0.232775	XP_004614710.2	DBT	-
0.0935734	-0.0821758	XP_054978328.1	CLU	-
0.557842	-1.00857	XP_004614818.2	HNRNPM	-
0.167283	-0.121032	XP_004614820.1	RAB11B	-
0.833844	0.730955	XP_004614825.1	TIMM44	+
0.809609	-0.735257	XP_004614851.1	PTBP1	-
0.674535	-0.390281	XP_004614854.1	ATP5F1D	-
2.16081	-0.576187	XP_004614868.1	TIMM13	-
0.0335	0.0433853	XP_054982690.1	SGTA	+
0.761745	1.27174	XP_004614967.2	AZU1	+
0.763641	0.921544	XP_004614986.1	NDUFS7	+
2.69505	-1.07136	XP_004615011.2	LMNB2	-
0.250868	-0.104053	XP_004615253.2	ABHD14B	-
0.0889818	0.059938	XP_004615265.3	MANF	+
0.509003	0.372358	XP_004615304.1	AMT	+
0.0403119	0.075103	XP_054991958.1	RHOA	+
1.92182	-0.808664	XP_004615309.2	GPX1	-
1.39772	-1.26039	XP_004615316.1	IMPDH2	-
0.534868	0.76577	XP_004615324.1	SLC25A20	+
0.533705	0.57179	XP_004615363.1	RACK1	+
0.0405475	0.106388	XP_004615500.1	ANXA11	+
0.946235	-0.956804	XP_004615522.1	DNAJC9	-
1.2842	0.890954	XP_055003343.1	HNF1A	+
0.0694745	0.0655949	XP_004615563.2	MMAB	+
0.113254	0.18862	XP_004615585.1	NIPSNAP1	+
1.47073	2.99652	XP_004615689.2	C5	+
0.0126036	0.037186	XP_004615719.1	GALK1	+
1.16851	-0.428113	XP_004615724.1	ATP5PD	-
0.93912	-0.545734	XP_004615734.1	NHERF1	-
0.231745	-0.193496	XP_004615803.1	MSN	-
0.0867949	-0.0847553	XP_054976074.1	EIF5B	-
0.730957	1.40795	XP_004615894.1	TUFM	+
0.228322	-0.29358	XP_004615901.1	CORO1A	-
0.923634	1.41768	XP_004615968.1	CCT6A	+
1.02509	1.24433	XP_004616002.2	MVP	+
0.94779	1.06393	XP_004616003.2	QPRT	+
0.158334	-0.323965	XP_004616018.1	STX4	-
0.863956	0.325587	XP_054977927.1	HAAO	+
0.369695	0.312908	XP_004616151.2	GALM	+
0.798428	0.935624	XP_054984131.1	KATNAL2	+
0.5324	-0.632389	XP_004616184.1	RPL17	-
0.911109	1.15025	XP_004616186.1	ACAA2	+
0.30789	-0.364636	XP_054984218.1	C2H18orf32	-
1.67787	1.85779	XP_004616227.2	APMAP	+
0.217668	0.377021	XP_054974058.1	KRAS	+
1.25095	-0.56463	XP_004616322.1	CAPZA1	-
1.04548	-0.668406	XP_004616393.1	NPM3	-
1.19051	-0.674963	XP_004616411.1	NDUFB8	-
0.334174	0.242263	XP_004616420.1	GOT1	+
0.0896693	0.0480324	XP_004616432.1	PGAM1	+
1.06249	-0.944384	XP_054975305.1	SORBS1	-
0.651039	-0.607408	XP_004616506.1	SRP72	-
1.56578	0.983448	XP_054991648.1	FHIT	+
0.164037	0.179055	XP_054991487.1	ACOX2	+
0.0989781	-0.233368	XP_004616530.1	PDHB	-
0.269746	0.62063	XP_004616540.2	FLNB	+
1.1184	0.387376	XP_004616543.1	ARF4	+
0.0233304	-0.0322655	XP_004616556.1	ACMSD	-
0.129184	-0.301225	XP_054978177.1	DARS1	-
2.77675	-2.41488	XP_004616615.1	EIF3G	-
1.57758	-0.599508	XP_004616628.1	TMED1	-
0.304669	-0.326842	XP_004616660.1	PRDX2	-
0.23098	-0.173673	XP_054982490.1	GCDH	-
0.657248	-1.27045	XP_004616664.1	FARSA	-
0.303966	-0.230988	XP_004616666.2	CALR	-
0.0476151	-0.089518	XP_054985132.1	RAD23A	-
0.187107	0.16305	XP_004616713.1	RPL18A	+
0.273037	0.525512	XP_004616729.3	RAB8A	+
0.215915	-0.469659	XP_054983857.1	BCL2L13	-
0.65934	-0.428252	XP_004616761.1	ATP6V1E1	-
0.645607	-0.37323	XP_054983508.1	SLC25A18	-
0.553913	-0.940513	XP_004616856.1	GADD45GIP1	-
1.33003	-0.600072	XP_004616875.3	NDUFB7	-
0.134028	0.163322	XP_004616955.2	PGLYRP2	+
1.25499	1.88265	XP_004616981.2	SLC27A5	+
0.722458	-0.347659	XP_004616982.1	RPS5	-
1.84521	-1.2	XP_055001560.1	U2AF2	-
0.0815406	0.0582088	XP_004616996.1	RPL28	+
0.98344	0.770084	XP_004617067.2	ISOC2	+
0.265235	-0.157898	XP_004617160.1	PBLD	-
2.72223	-0.719022	XP_054994693.1	HNRNPH3	-
2.69364	-1.29854	XP_004617168.1	DDX21	-
0.640933	0.72187	XP_004617191.2	TUBA4A	+
0.231116	-0.34585	XP_004617284.1	AIMP2	-
0.533166	-0.409502	XP_004617310.2	EIF3B	-
1.25233	1.01702	XP_004617339.2	ECH1	+
0.911974	-0.79772	XP_004617366.1	ACTL6B	-
0.190772	-0.103558	XP_004617420.1	PSMB1	-
0.0850373	-0.0619381	XP_004617433.1	RPS16	-
0.012448	-0.0169235	XP_004617468.2	LRPAP1	-
1.3035	-0.60972	XP_004617532.2	GRPEL1	-
0.883434	-0.488277	XP_004617585.2	MRPL46	-
0.558982	-0.665105	XP_004617600.1	STARD5	-
0.127009	-0.242192	XP_004617607.1	TMED3	-
0.00531287	-0.0058197	XP_054987342.1	SNRPB	-
0.125168	-0.106127	XP_004617643.2	IDH2	-
0.15794	-0.123814	XP_004617657.1	RPS17	-
0.818887	0.408454	XP_004617668.1	MESD	+
0.0193985	-0.00891952	XP_004617673.1	FAH	-
0.332794	-0.199168	XP_004617680.1	IDH3A	-
1.72359	-0.526644	XP_004617708.1	RPS10	-
0.585507	-0.617128	XP_004617724.1	PFDN6	-
0.765248	-0.374332	XP_004617727.1	RPS18	-
0.760719	-0.64356	XP_004617766.1	RPL10A	-
0.505399	0.142349	XP_004617853.2	ECHS1	+
0.00509219	-0.00734978	XP_004617930.2	ALB	-
0.919445	-1.00494	XP_004617950.2	NAAA	-
0.16257	-0.239732	XP_004617972.2	JCHAIN	-
0.793414	-0.399022	XP_004618039.2	APOH	-
0.00567979	0.00797691	XP_004618043.1	DDX5	+
0.141011	-0.269606	XP_054989830.1	PSMC5	-
0.798161	-0.74107	XP_004618113.1	SF3B4	-
0.906908	-0.386493	XP_004618148.2	SELENBP1	-
1.04979	-0.743775	XP_004618149.2	PSMB4	-
0.188015	-0.160421	XP_004618152.2	CGN	-
0.197215	0.162119	XP_004618169.1	HMGCS2	+
0.106124	0.10169	XP_004618176.2	CA14	+
0.0131013	0.018293	XP_004618228.1	TMED7	+
0.861615	0.97091	XP_004618229.2	CDO1	+
1.48521	-0.698934	XP_004618256.1	RAB6A	-
0.0561772	-0.0657486	XP_004618268.1	LAMTOR1	-
0.320412	-0.607747	XP_004618297.1	HBE1	-
0.417896	-0.263194	XP_004618427.2	STIP1	-
0.261019	-0.383439	XP_004618436.2	TRMT112	-
0.119902	-0.0911999	XP_004618455.3	EHD1	-
1.6761	2.53884	XP_004618466.1	FAU	+
1.41241	-1.08077	XP_004618467.2	MRPL49	-
1.04129	-0.32928	XP_004618483.1	CFL1	-
0.455717	-0.381406	XP_004618490.1	BANF1	-
0.0199251	-0.0218044	XP_004618492.1	RAB1B	-
0.620177	0.717717	XP_004618496.1	MRPL11	+
0.609587	0.885675	XP_054999150.1	DPP3	+
0.138872	0.360374	XP_004618505.2	ACTN3	+
0.368556	-0.359391	XP_004618506.1	CCS	-
0.110842	-0.280119	XP_004618507.1	RBM14	-
0.312641	-0.292382	XP_004618537.1	NDUFV1	-
2.26324	-0.603008	XP_054998181.1	NDUFS8	-
0.383277	0.491175	XP_054978573.1	MCFD2	+
0.365384	-0.445567	XP_004618689.2	GFUS	-
1.43269	1.37319	XP_004618698.2	PLEC	+
0.315892	-0.188684	XP_054981854.1	RPL8	-
0.0749836	0.368599	XP_054985260.1	PCYT1A	+
0.930312	1.65603	XP_004618806.2	CTSA	+
0.781978	-0.617233	XP_004618917.1	LYRM4	-
1.47286	0.871558	XP_004618969.1	HADHA	+
1.39166	0.624906	XP_054976404.1	HADHB	+
0.0898725	-0.108504	XP_004618986.1	KHK	-
1.35176	-1.33218	XP_004619014.2	EMILIN1	-
0.525536	0.690034	XP_004619072.2	KMO	+
0.212255	-0.0926296	XP_004619073.1	FH	-
0.0394182	-0.106819	XP_004619129.1	F2	-
0.0971798	0.13503	XP_004619141.1	PSMC3	+
0.675212	-0.276474	XP_004619144.1	NDUFS3	-
0.304781	-0.307905	XP_004619194.1	DPYSL2	-
0.247927	0.222295	XP_004619199.1	PPP2R2A	+
0.518027	0.91249	XP_054996440.1	FMO5	+
0.0175771	-0.034771	XP_054994509.1	GBA1	-
1.16845	-0.674781	XP_004619279.1	RBM8A	-
0.0678425	0.113422	XP_004619293.1	S100A1	+
0.300509	-0.288479	XP_054995338.1	PKLR	-
0.123923	0.191208	XP_054995870.1	FDPS	+
1.32804	-0.660027	XP_054995775.1	LMNA	-
0.0562241	-0.0844509	XP_054994156.1	MRPL24	-
0.121658	0.205093	XP_004619452.1	TUBB4A	+
0.713975	0.879805	XP_004619465.2	LONP1	+
0.100556	0.0954788	XP_004619466.1	RPL36	+
0.0784403	-0.178779	XP_004619475.1	MYDGF	-
0.671324	0.633494	XP_004619485.1	EEF2	+
0.131196	0.12954	XP_004619538.1	CLPP	+
0.350604	-0.444516	XP_004619545.1	MICOS13	-
0.540905	-0.590211	XP_004619631.2	GLRX5	-
0.325221	-0.259113	XP_004619686.1	RPL4	-
0.258006	0.509945	XP_004619738.1	RTCB	+
0.0654134	0.0527313	XP_004619872.1	DHDH	+
0.386114	0.552089	XP_004619892.1	RPL13A	+
0.0651241	-0.034668	XP_004619896.1	RPS11	-
0.690327	-1.00969	XP_004619905.1	AP2A1	-
0.013748	0.0266678	XP_055001762.1	NUP62	+
2.0034	-0.626123	XP_004619927.2	ASPDH	-
0.354681	-0.131252	XP_004619937.1	ETFB	-
1.08291	0.954264	XP_004619940.1	PPP2R1A	+
1.81726	-0.613538	XP_004619944.1	RIDA	-
0.0915802	-0.140336	XP_004619995.2	GCLM	-
1.02437	1.88715	XP_004620092.1	S100A8	+
2.06061	2.19679	XP_004620094.1	S100A9	+
0.0369239	-0.0455803	XP_004620110.1	PSMA5	-
0.488049	0.283076	XP_004620154.1	ATP5PB	+
0.238383	-0.37753	XP_004620167.1	ASPN	-
2.71492	-0.789444	XP_054994729.1	TPD52L2	-
0.48648	0.40147	XP_004620324.1	PCK1	+
0.0159635	-0.00747108	XP_004620333.1	ADRM1	-
0.390169	0.140626	XP_004620391.1	ATP5PO	+
0.381098	-0.267097	XP_054998476.1	TIMM10	-
1.89159	-0.511949	XP_004620571.1	CMPK1	-
0.0368044	0.0849934	XP_004620574.1	PDZK1IP1	+
1.00955	0.887244	XP_004620601.1	AKR1A1	+
1.4073	-0.471059	XP_054980861.1	SUMO3	-
0.690188	-0.405743	XP_054997245.1	RPS14	-
0.657196	1.18819	XP_004620737.1	AGXT	+
0.689522	-0.243718	XP_004620745.1	RPS3	-
1.0133	-0.544733	XP_004620763.1	RPS19	-
0.364564	-0.300685	XP_055001711.1	SNRPA	-
0.842512	-0.630715	XP_004620792.1	BLVRB	-
0.321275	-0.449107	XP_004620804.1	PSMC4	-
0.167624	0.234213	XP_004620806.1	FBL	+
0.221928	0.497326	XP_055002279.1	BCKDHA	+
0.0449898	-0.0667454	XP_004620899.1	CLDN3	-
0.555014	-0.539224	XP_004620955.1	FIS1	-
1.19627	-0.840274	XP_054987175.1	UBTF	-
0.554787	0.805461	XP_004621109.2	SLC25A10	+
0.341353	0.494683	XP_054987363.1	LGALS3BP	+
0.342485	0.372346	XP_004621223.3	CCDC90B	+
0.728959	0.900907	XP_004621273.1	TPP1	+
0.582161	1.34874	XP_004621284.2	HPX	+
1.79356	-0.767035	XP_054981275.1	DDX39B	-
0.438891	-0.868079	XP_054982999.1	CSNK2B	-
0.0178893	0.0511929	XP_054984698.1	PPT2	+
0.284299	0.229434	XP_004621375.1	APOM	+
0.0302365	0.0406639	XP_004621455.1	PDCD6	+
0.460365	0.287184	XP_004621491.2	ETHE1	+
0.55895	-0.975461	XP_054989468.1	NAXD	-
0.635413	-0.846603	XP_004621570.2	HNRNPUL2	-
0.697436	-0.732499	XP_054994472.1	ALDH3A2	-
0.0814691	-0.171133	XP_004621742.1	UGT2A2	-
1.50871	-0.691237	XP_004621757.1	NDUFC2	-
0.0408538	-0.0534721	XP_004621764.2	SULT1C4	-
2.25778	-0.614412	XP_004621810.1	GABARAPL1	-
0.277185	0.621604	XP_004621926.2	STOM	+
0.36842	-0.449961	XP_004621947.1	H1-4	-
0.824056	-1.2842	XP_004621955.1	H1-2	-
1.60019	2.19809	XP_004621998.1	H1-5	+
1.77883	-1.9414	XP_004622075.1	RAB8B	-
0.187318	0.426793	XP_004622775.2	BOLA2B	+
0.27207	0.447837	XP_004622795.3	SEPHS2	+
0.344166	-0.240667	XP_054982313.1	NDUFA13	-
0.0741345	-0.219446	XP_012787227.1	FAHD1	-
1.43562	-1.75905	XP_012787360.2	MYBBP1A	-
0.803293	1.09479	XP_012787530.1	NDUFAF4	+
0.432728	-0.366631	XP_054997262.1	RPS13	-
0.150475	-0.329965	XP_055000769.1	ARFIP1	-
1.24575	-0.798143	XP_012787729.2	DKC1	-
0.329436	-0.288502	XP_012787801.2	CDK13	-
1.60509	1.31221	XP_012787843.2	GBE1	+
0.438011	-0.478936	XP_012787942.1	LIPA	-
0.647933	-1.01522	XP_012788006.2	VASP	-
2.20212	0.688717	XP_054976861.1	APOOL	+
0.0617457	-0.0567017	XP_054988831.1	CHMP4A	-
0.0315265	-0.0436123	XP_054988830.1	GMPR2	-
0.0436924	0.031897	XP_012788809.2	ERP29	+
1.50419	2.10372	XP_012788836.2	GYS2	+
0.488299	0.655222	XP_054979684.1	BHMT2	+
0.448337	-0.375222	XP_012789659.2	KRT7	-
0.743092	-1.19991	XP_012790028.1	ACP5	-
0.0412998	-0.0406975	XP_012790124.2	AZGP1	-
0.945712	-1.18687	XP_012790357.2	GCH1	-
0.433024	-0.848548	XP_012790362.1	S100A11	-
0.116851	-0.0986774	XP_054999402.1	FKBP2	-
0.0792853	-0.260423	XP_054988340.1	SEC61G	-
0.223238	0.217223	XP_012790549.1	CCT8	+
0.19865	-0.150558	XP_012790619.1	GLO1	-
1.48558	-0.973675	XP_012790764.1	SNRNP70	-
0.875045	-0.940879	XP_012790775.2	CPQ	-
0.73228	-1.38221	XP_012790832.1	LAMTOR5	-
1.01913	-0.731051	XP_012791329.2	RPL38	-
1.02023	-0.705538	XP_012791502.2	RMDN1	-
2.21251	-0.941956	XP_054988447.1	SET	-
1.03209	1.87289	XP_054983482.1	CP	+
0.0934297	0.11813	XP_012791660.2	AHSG	+
0.666678	-0.356369	XP_054973897.1	LAMP1	-
0.0587852	0.0314274	XP_054973928.1	HSP90B1	+
0.665108	0.534426	XP_054974069.1	CPSF6	+
0.0545261	-0.0828972	XP_054974079.1	TPPP	-
1.63016	-0.771391	XP_054974113.1	NDUFS6	-
0.0709753	0.171371	XP_054974119.1	RAB21	+
0.939294	1.55871	XP_054974158.1	TXNRD1	+
0.344882	0.936209	XP_054974174.1	ACSS3	+
0.154552	0.21975	XP_054974195.1	NAP1L1	+
0.366167	0.485584	XP_054974196.1	MGST1	+
0.154327	0.1096	XP_054974239.1	ANXA2	+
0.784685	-0.894796	XP_054974272.1	TMPO	-
1.13083	-0.539042	XP_054974273.1	UBE2N	-
0.678104	0.84435	XP_054974339.1	HAL	+
0.970512	-0.484066	XP_054974365.1	RAP1B	-
0.570726	0.89492	XP_054974382.1	SLC25A3	+
1.22351	1.18474	XP_054974400.1	LIPC	+
1.37492	-0.910724	XP_054974403.1	MRPL42	-
0.776047	1.3772	XP_054974518.1	FGL1	+
2.04936	-2.20399	XP_054974519.1	CMAS	-
0.850639	-1.09676	XP_054974526.1	YBX3	-
0.43649	0.760134	XP_054974623.1	CAND1	+
0.765664	-0.625098	XP_054974678.1	PAPSS2	-
1.44636	-0.664849	XP_054974746.1	ATP5MK	-
1.0574	-0.400481	XP_054974810.1	HNRNPF	-
1.11656	-0.531268	XP_054974894.1	BAG3	-
0.288894	-0.454495	XP_054974940.1	EIF3A	-
0.110402	0.146004	XP_054975076.1	AS3MT	+
0.258399	0.195991	XP_054975084.1	ACADSB	+
0.193387	-0.390961	XP_054975093.1	WASHC2A	-
1.23129	-1.92282	XP_054975185.1	ANP32B	-
0.078298	0.145433	XP_054975191.1	PDLIM1	+
0.0537535	0.0608265	XP_054975194.1	GLUD1	+
0.851222	-0.295393	XP_054975227.1	UBE2L3	-
0.0153186	-0.0229267	XP_054975254.1	HOGA1	-
0.668052	-0.328952	XP_054975368.1	SNAP29	-
0.0470358	-0.0871922	XP_054975376.1	ADIRF	-
0.52847	0.704269	XP_054975406.1	NOLC1	+
0.0858271	0.271178	XP_054975469.1	GLRX3	+
0.143368	-0.25429	XP_054975488.1	OAT	-
0.063871	-0.149432	XP_054975590.1	ABLIM1	-
0.394029	0.506889	XP_054975686.1	SPTBN1	+
0.620141	0.674961	XP_054975689.1	ACYP2	+
1.1364	-0.930668	XP_054975713.1	EHD3	-
0.615983	-0.224183	XP_054975729.1	HDLBP	-
1.22518	-1.99752	XP_054975732.1	SEPTIN2	-
3.98309	-0.776525	XP_054975812.1	PRDX6	-
0.286137	0.526059	XP_054975877.1	TGOLN2	+
0.815636	0.368119	XP_054975887.1	ATP1B1	+
0.542132	0.860379	XP_054975899.1	PCCA	+
0.376415	-0.574803	XP_054975916.1	PRRC2C	-
0.656392	-0.715742	XP_054975931.1	CLYBL	-
0.370506	0.388788	XP_054975995.1	UGP2	+
0.934299	-1.12248	XP_054976039.1	MECP2	-
0.460455	0.270777	XP_054976048.1	IMMT	+
1.79853	0.737218	XP_054976169.1	CACYBP	+
1.23224	0.942043	XP_054976241.1	ACTR3	+
0.714317	-0.533561	XP_054976290.1	PPP3R1	-
0.120823	-0.0883411	XP_054976353.1	LAMP2	-
0.554133	-0.280669	XP_054976411.1	HMGN5	-
1.49793	-0.35309	XP_054976471.1	ACP1	-
0.818415	-0.429787	XP_054976480.1	MOB4	-
0.284726	-0.182795	XP_054976501.1	EEF1B2	-
0.857172	-0.562973	XP_054976528.1	NCL	-
1.52427	-0.580407	XP_054976588.1	ARPC5	-
0.293743	-0.761388	XP_054976624.1	NONO	-
1.93403	1.66169	XP_054976660.1	FLNA	+
0.535237	-0.923651	XP_054976707.1	SCLY	-
0.782153	1.06996	XP_054976716.1	NDUFA10	+
0.190934	0.230226	XP_054976786.1	EIF1AX	+
0.334994	0.785649	XP_054976835.1	UBA1	+
0.546552	0.458214	XP_054976867.1	AOX1	+
0.485511	0.623016	XP_054976946.1	PFDN2	+
0.90679	0.536898	XP_054977016.1	PRDX4	+
0.48374	-0.347614	XP_054977174.1	FCER1A	-
1.01103	-0.348694	XP_054977181.1	FCRLA	-
0.0852554	0.108215	XP_054977200.1	GLUL	+
0.278049	0.420134	XP_054977341.1	XDH	+
0.861518	-0.479866	XP_054977351.1	SH3BGRL	-
0.539428	-0.652817	XP_054977437.1	DHX9	-
1.15099	-0.588505	XP_054977535.1	HNRNPK	-
1.01736	-0.560325	XP_054996488.1	HDGF	-
0.874267	-0.561417	XP_054977552.1	PTMA	-
0.363975	0.814539	XP_054977563.1	ARPC5L	+
0.305304	0.868506	XP_054977578.1	SDHC	+
0.613548	-0.816062	XP_054977592.1	HMGB3	-
0.449059	0.49841	XP_054977618.1	ADI1	+
0.404203	-0.650559	XP_054977622.1	RALA	-
0.661838	-0.417885	XP_054977633.1	PEX19	-
0.260445	0.212437	XP_054977638.1	ACTR2	+
0.370626	0.580861	XP_054977677.1	GPD2	+
0.00201011	-0.00239754	XP_054977709.1	RAB10	-
0.52201	-0.569033	XP_054977710.1	UCHL3	-
0.451193	-0.81345	XP_054977797.1	NFU1	-
1.36644	0.767598	XP_054977815.1	RBKS	+
0.143845	0.155029	XP_054977817.1	ACADL	+
0.0431599	0.103936	XP_054977825.1	RPL31	+
0.706751	-1.36164	XP_054977875.1	PPP1CB	-
0.801624	-0.40655	XP_054977895.1	TPT1	-
0.804607	1.46809	XP_054977997.1	SRSF7	+
0.749068	-1.31023	XP_054978103.1	ATP6V1G1	-
0.0518486	0.133747	XP_054978139.1	RAP2C	+
0.203201	-0.195728	XP_054991666.1	RPL29	-
1.27271	-0.672466	XP_054978180.1	RBMX	-
0.269225	-0.209711	XP_054978200.1	RPS7	-
1.13912	-1.1099	XP_054978227.1	TMSB10	-
1.45938	1.08918	XP_054978235.1	MTX2	+
0.510418	-0.296881	XP_054978369.1	PDIA6	-
0.585693	-0.275916	XP_054978372.1	GK	-
0.292695	-0.401263	XP_054978429.1	YWHAQ	-
2.46312	-1.25114	XP_054978548.1	NDUFS4	-
0.0143559	0.0147373	XP_054978666.1	HPRT1	+
0.501658	-0.311867	XP_054978722.1	SUGT1	-
0.6791	-0.424749	XP_054978801.1	CCT4	-
0.684557	-0.613429	XP_054978813.1	DDX1	-
0.14645	0.14245	XP_054978879.1	APOO	+
1.16189	-1.87271	XP_054978884.1	MAOB	-
0.294948	-0.192318	XP_054978920.1	DPY30	-
0.0111111	-0.0257908	XP_054978981.1	COL6A3	-
0.652869	-0.318322	XP_054984664.1	UBA52	-
0.378772	0.694865	XP_054979050.1	EVA1A	+
0.338734	-0.493296	XP_054979063.1	SCN7A	-
1.25899	-1.43681	XP_054979165.1	DES	-
0.572907	-0.751071	XP_054979183.1	ARPC2	-
0.0930077	-0.186686	XP_054979217.1	GNLY	-
2.25518	-0.76925	XP_054979232.1	HNRNPA2B1	-
2.04173	-1.00508	XP_054979276.1	CBX3	-
1.8392	-0.568079	XP_054979268.1	PEA15	-
0.83932	-1.12583	XP_054979271.1	DPP4	-
0.328584	-0.153507	XP_054979336.1	BCAP31	-
0.0964168	-0.237427	XP_054979424.1	COPS9	-
1.09017	-0.644987	XP_054979466.1	CD99L2	-
2.28199	-0.772449	XP_054979556.1	CHCHD3	-
0.749736	1.93255	XP_054979585.1	ASMTL	+
0.321638	0.289744	XP_054979587.1	SLC25A6	+
0.157099	0.157745	XP_054979628.1	HSDL2	+
0.0904541	0.0594421	XP_054979683.1	BHMT	+
0.0844481	-0.060741	XP_054979691.1	RAB14	-
0.197591	0.124954	XP_054979824.1	ERP44	+
0.905412	-0.779595	XP_054979840.1	FXN	-
0.452227	-0.52455	XP_054979913.1	DNAJA1	-
0.133838	0.138772	XP_054979920.1	SSBP1	+
0.670087	1.14142	XP_054979928.1	CMBL	+
1.37485	-1.02276	XP_054980088.1	DPP7	-
0.101621	0.0988369	XP_054980092.1	TUBB4B	+
1.34619	-0.647154	XP_054980229.1	HNRNPAB	-
0.263706	0.652908	XP_054980235.1	BPHL	+
1.16023	-0.849673	XP_054980747.1	MRPL55	-
1.63626	-0.514314	XP_054980963.1	CLTB	-
2.26269	-2.8101	XP_054980977.1	SMARCC2	-
1.59762	-0.630494	XP_054980979.1	MYL6	-
0.0125821	0.0210686	XP_054981002.1	SOD1	+
1.86133	-1.57315	XP_054981008.1	UBE2V2	-
0.22751	-0.178918	XP_054981076.1	NDUFA7	-
0.0884896	0.0787888	XP_054981081.1	RPS28	+
0.16814	-0.12589	XP_054981306.1	FAM114A2	-
1.51672	-1.58079	XP_054981316.1	CD47	-
0.892571	-0.587921	XP_054981333.1	ANP32A	-
0.0535058	0.138429	XP_054981423.1	PLXNA2	+
0.0819529	0.0729652	XP_054981591.1	TUBB	+
0.308442	-0.220942	XP_054981632.1	ACOT13	-
0.0963003	-0.166777	XP_054981636.1	COL18A1	-
0.256284	0.329847	XP_054981663.1	GMPR	+
0.0376844	0.076548	XP_054981737.1	EIF4G1	+
2.22977	-0.905902	XP_054981782.1	TPD52	-
0.441469	0.215888	XP_054981847.1	GPT	+
0.567508	-0.225994	XP_054981990.1	YWHAZ	-
0.0514246	0.0932426	XP_054981995.1	TUBA1B	+
0.209289	-0.164404	XP_054982024.1	NDUFB5	-
0.0137325	0.0272526	XP_054982036.1	CXADR	+
1.41898	0.814268	XP_054982198.1	CBS	+
1.39821	-0.832151	XP_054982206.1	MTDH	-
0.650319	-0.44278	XP_054982297.1	VAPA	-
0.120709	0.160452	XP_054982337.1	RAB2A	+
1.16265	1.37054	XP_054982365.1	AUH	+
0.54499	-0.322424	XP_054982430.1	BSG	-
0.0193566	0.0325844	XP_054982433.1	PLVAP	+
1.14015	-0.705389	XP_054982434.1	BST2	-
0.799505	0.831702	XP_054982441.1	NPC1	+
0.540888	0.694566	XP_054987160.1	RPS24	+
0.902986	-0.539324	XP_054982473.1	CANX	-
1.01353	0.500029	XP_054982488.1	PTGR3	+
0.618402	0.8025	XP_054982513.1	ILF3	+
0.106021	-0.117392	XP_054982580.1	CNDP2	-
0.952767	-0.795885	XP_054982581.1	GM2A	-
0.297631	-0.451846	XP_054982617.1	CLINT1	-
0.191641	0.331725	XP_054982622.1	SFXN1	+
0.332682	-0.168565	XP_054982632.1	NIT2	-
0.523276	-0.346729	XP_054982644.1	EPS15L1	-
1.49001	-1.54775	XP_054982707.1	COL6A1	-
0.866152	0.924154	XP_054982788.1	EIF2A	+
0.0255425	0.0906322	XP_054982834.1	SEC62	+
0.455327	0.426167	XP_054982846.1	LDLR	+
0.540539	0.462568	XP_054982859.1	REEP6	+
0.695318	-0.240222	XP_054982938.1	EIF4B	-
0.0686977	-0.124882	XP_054983023.1	KYNU	-
2.47951	-1.05296	XP_054983114.1	ALCAM	-
0.320161	-0.451254	XP_054983162.1	FAM162A	-
1.07124	-1.30342	XP_054983178.1	EEF1E1	-
0.131834	0.323999	XP_054983197.1	KHSRP	+
0.802882	0.6106	XP_054983226.1	TPM4	+
0.383164	-0.439814	XP_054983231.1	LMAN2	-
0.803759	0.947716	XP_054983267.1	LSM2	+
1.59956	0.830277	XP_054983346.1	DECR1	+
0.215191	0.599807	XP_054983452.1	RPS15	+
0.0546867	0.0976585	XP_054983562.1	TRA2B	+
1.17711	-0.828598	XP_054983591.1	KIAA1191	-
0.146405	-0.2214	XP_054983597.1	MRPL13	-
1.93394	-0.647278	XP_054983605.1	ATOX1	-
0.140629	0.14268	XP_054983667.1	KNG1	+
0.596143	-0.367648	XP_054983675.1	RPL30	-
2.30261	-0.567416	XP_054983715.1	NPM1	-
0.152266	-0.156999	XP_054983757.1	CDH2	-
0.98761	-0.511809	XP_054983818.1	PCNP	-
0.279961	-0.45488	XP_054983835.1	PSMA2	-
0.291256	0.444349	XP_054983925.1	FKBP11	+
0.70226	0.737674	XP_054983928.1	DPYS	+
0.581998	0.507826	XP_054984047.1	HRG	+
0.673528	0.569964	XP_054984106.1	PA2G4	+
0.0440392	0.109207	XP_054984113.1	PTGES3	+
0.588431	-0.833826	XP_054984125.1	APP	-
0.400223	-0.283695	XP_054984154.1	SSR1	-
1.25925	-0.822685	XP_054984179.1	FXR1	-
0.819892	1.21173	XP_054984223.1	PDIA5	+
0.289843	0.280037	XP_054984300.1	SERPINB1	+
0.0460026	0.0832344	XP_054984303.1	HSPA13	+
0.261462	-0.356987	XP_054984316.1	CA2	-
0.208906	0.229943	XP_054984383.1	TXNDC5	+
0.761828	0.935917	XP_054984384.1	CPA3	+
0.106847	-0.078978	XP_054984433.1	PDXK	-
1.0411	0.359419	XP_054984476.1	MBP	+
1.29651	-1.14815	XP_054984483.1	LYPLA1	-
0.12165	0.111311	XP_054984542.1	MAN2B1	+
0.291307	0.454233	XP_054984609.1	PABPC1	+
0.272412	0.543483	XP_054984623.1	SDC2	+
1.43259	0.922647	XP_054984748.1	ECI2	+
0.713399	-0.293357	XP_054984770.1	CDV3	-
0.00408079	-0.00422783	XP_054984823.1	TXNL1	-
0.215711	-0.328766	XP_054984923.1	ICAM1	-
1.57164	-0.763577	XP_054984967.1	G3BP1	-
0.314867	0.352976	XP_054984994.1	ACSS1	+
0.886962	-1.14341	XP_054985062.1	TNXB	-
0.357133	0.357333	XP_054985077.1	CFB	+
0.474249	0.155497	XP_054985092.1	ATP5PF	+
0.152894	0.304593	XP_054985164.1	LRP1	+
1.06814	1.44061	XP_054985241.1	DSP	+
0.706315	-0.366131	XP_054985326.1	PYM1	-
0.49616	-0.282095	XP_054985368.1	PRKCSH	-
1.2821	-0.56634	XP_054985445.1	RPS20	-
0.212636	0.327439	XP_054985451.1	ALDH5A1	+
0.749943	1.12867	XP_054985508.1	LPP	+
0.6492	-1.03454	XP_054985520.1	UBE2H	-
0.191572	0.64588	XP_054985936.1	PDE4DIPP2	+
1.34002	-0.517457	XP_054985990.1	MRPL12	-
2.04396	-1.19239	XP_054986043.1	SRSF1	-
0.138334	-0.168312	XP_054986047.1	ACIN1	-
1.33355	0.838025	XP_054986081.1	CD68	+
0.142006	0.204677	XP_054986113.1	GAA	+
0.824163	-1.14503	XP_054986280.1	PALM2AKAP2	-
0.703929	0.267251	XP_054986368.1	PSMD4	+
1.59247	-0.609919	XP_054986405.1	DYNLL2	-
0.553919	0.342244	XP_054986440.1	DLST	+
0.285967	0.193731	XP_054986452.1	ACTG1	+
0.521426	-1.28904	XP_054986524.1	KTN1	-
0.0643338	0.0412907	XP_054986562.1	HYOU1	+
0.1991	-0.37298	XP_054986580.1	RCN2	-
0.252945	0.471949	XP_054986650.1	AP2B1	+
1.53792	-0.581428	XP_054986759.1	HNRNPC	-
0.148943	0.0782856	XP_054986784.1	PCBD1	+
1.75166	-0.942951	XP_054986791.1	TAF15	-
0.308023	-0.78616	XP_054986794.1	EIF2S1	-
1.02478	0.366287	XP_054987010.1	P4HB	+
0.111388	0.15725	XP_054987022.1	ENTPD5	+
0.0365113	0.021106	XP_054987106.1	RDX	+
0.174076	0.18947	XP_054987166.1	ACTC1	+
0.169555	0.0671291	XP_054987194.1	GSTZ1	+
0.825442	-0.554154	XP_054987241.1	ALYREF	-
1.31645	-0.880375	XP_054987308.1	PECAM1	-
0.353318	-0.477583	XP_054987387.1	CRIP2	-
0.850007	1.35243	XP_054987424.1	FDXR	+
0.131738	0.396202	XP_054987426.1	MAVS	+
0.822175	-0.342806	XP_054987459.1	ARHGDIA	-
3.04827	-1.12706	XP_054987461.1	MRPS26	-
0.232143	-0.12258	XP_054987486.1	VCL	-
0.324458	-0.264785	XP_054987503.1	ACAT1	-
0.360317	-0.330325	XP_054995659.1	MAPRE1	-
0.360163	0.693211	XP_054987616.1	PSMC1	+
0.300209	-0.570885	XP_054987643.1	EIF5	-
0.580226	-1.40301	XP_054987677.1	NDUFB1	-
0.686818	-0.492208	XP_054987781.1	SERPINA1	-
0.12962	-0.116845	XP_054987850.1	GTF2A1	-
2.32338	-1.24976	XP_054987870.1	NOP56	-
0.0959154	-0.210995	XP_054987871.1	IDH3B	-
1.37947	-2.33923	XP_054987885.1	KRT19	-
0.22264	0.167845	XP_054987912.1	VDAC2	+
0.686459	0.74951	XP_054987922.1	LRRC59	+
0.627093	-0.421913	XP_054988011.1	ARF6	-
1.0592	0.460736	XP_054988058.1	RPS9	+
0.562479	-0.302996	XP_054988152.1	HSPA5	-
0.185336	-0.123695	XP_054988254.1	ITGA1	-
0.00742963	0.0069458	XP_054988289.1	DCXR	+
0.694872	-0.572914	XP_054988345.1	CKB	-
0.218495	0.510733	XP_054988392.1	CTSS	+
0.406789	-0.473692	XP_054988421.1	SEC22B	-
0.0162487	-0.0284168	XP_054988502.1	GNPNAT1	-
0.748793	-1.29106	XP_054988523.1	SYNE2	-
0.491621	-0.395444	XP_054988619.1	RAP2A	-
0.256785	-0.522278	XP_054988643.1	S100A10	-
0.144213	0.279403	XP_054988648.1	HSP90AA1	+
0.335293	-0.278911	XP_054988745.1	NPTN	-
0.077427	0.267215	XP_054988760.1	SAR1A	+
0.387531	-0.283782	XP_054988790.1	RRBP1	-
0.0258959	0.0463539	XP_054988840.1	PIPOX	+
1.34257	0.845547	XP_054988921.1	ALDH6A1	+
0.245883	-0.332684	XP_054988958.1	EPN3	-
0.454664	0.755571	XP_054989027.1	OGDH	+
1.12106	-1.37225	XP_054989036.1	PURB	-
0.383864	-0.607766	XP_054989072.1	CFL2	-
0.475952	-0.261595	XP_054989076.1	PPA1	-
0.239877	-0.737795	XP_054989104.1	AKAP1	-
0.243721	0.169535	XP_054989180.1	PSAP	+
0.955036	-0.483005	XP_054989195.1	RPL7A	-
1.32214	-0.950038	XP_054989254.1	GRB2	-
0.615958	0.786216	XP_054989255.1	PSMA6	+
0.670624	0.38477	XP_054989294.1	AFMID	+
0.286997	0.755832	XP_054989357.1	WARS1	+
0.639714	-0.611288	XP_054989534.1	CHMP6	-
0.0670232	-0.0684536	XP_054989574.1	ACADVL	-
1.03521	1.67653	XP_054989585.1	ABCA6	+
1.25773	0.653884	XP_054989635.1	GLOD4	+
0.659443	-0.687837	XP_054989641.1	BAIAP2	-
0.492549	0.220422	XP_054989698.1	LGMN	+
0.0861872	-0.081097	XP_054989740.1	JPT1	-
0.207566	-0.157282	XP_054989777.1	ACOX1	-
0.373887	-0.254958	XP_054989850.1	RPL19	-
0.607262	-0.479065	XP_054989881.1	PPIF	-
2.39766	-1.04944	XP_054989895.1	MRPS23	-
0.432495	0.827781	XP_054989901.1	DYNC1H1	+
0.604082	0.471726	XP_054990148.1	ACO1	+
6.98e-05	-0.000111008	XP_054990151.1	ITIH4	-
1.28698	1.98918	XP_054990153.1	ITIH3	+
0.211421	0.337538	XP_054990279.1	KYAT1	+
2.76456	-1.78403	XP_054990296.1	SRRT	-
0.199307	0.312626	XP_054990300.1	PRKAR2A	+
0.0660023	0.0873093	XP_054990338.1	PDAP1	+
0.0915229	0.208769	XP_054990339.1	ATP5MF	+
0.482236	-0.374033	XP_054990346.1	ACY1	-
0.427447	0.757871	XP_054990363.1	GLDC	+
0.444177	0.710937	XP_054990485.1	ALAD	+
0.173437	0.261091	XP_054990647.1	GUSB	+
1.05577	-0.299742	XP_054990815.1	ARPC4	-
0.376891	-0.814686	XP_054990853.1	CAST	-
1.07748	-0.470397	XP_054990906.1	LRRFIP2	-
0.250141	0.268425	XP_054991022.1	COL6A5	+
0.776085	-0.653691	XP_054991066.1	RPL15	-
1.02352	0.699371	XP_054991127.1	ALDH1L1	+
0.667627	0.602125	XP_054991141.1	CTSB	+
0.443652	-0.367564	XP_054991153.1	RAB7A	-
1.62207	1.61356	XP_054991214.1	ECHDC1	+
1.18347	1.8253	XP_054991247.1	GLB1	+
0.417908	-0.260967	XP_054991256.1	YWHAG	-
0.146089	0.151828	XP_054991268.1	MAP4	+
0.251003	0.134816	XP_054991300.1	PDIA4	+
0.537713	0.942781	XP_054991321.1	RAC1	+
0.0977943	-0.0894859	XP_054991451.1	GFER	-
0.168052	0.208712	XP_054991475.1	UBE2I	+
1.71249	-0.70309	XP_054991483.1	UBQLN1	-
0.440909	0.779818	XP_054991496.1	RFK	+
0.0674857	-0.152327	XP_054991513.1	ARL8B	-
0.423813	-0.286674	XP_054991544.1	NDUFAB1	-
0.37895	0.201539	XP_054991653.1	ASL	+
0.0939312	0.0785793	XP_054991657.1	RPSA	+
0.00309466	0.00637665	XP_054991711.1	DNAJA3	+
0.394986	-0.229356	XP_054991717.1	NDE1	-
0.581162	0.701501	XP_054991737.1	SLC25A15	+
0.332491	0.208773	XP_054991769.1	CHCHD6	+
0.184092	-0.338285	XP_054991771.1	ARPC1B	-
0.870078	-1.28695	XP_054991912.1	BRK1	-
0.0288432	0.033054	XP_054991925.1	RPS12	+
2.07713	-0.844259	XP_054991926.1	PARP3	-
0.685285	-0.598613	XP_054991954.1	DAG1	-
0.745971	-0.642427	XP_054992080.1	PCMT1	-
1.01082	-0.526488	XP_054992093.1	ALDH1B1	-
0.129506	0.393301	XP_054992112.1	ACSM5	+
0.370838	0.432391	XP_054992117.1	GLRX	+
0.0583231	0.157676	XP_054992149.1	ENPP1	+
1.39218	-1.26325	XP_054992159.1	GP2	-
0.077847	-0.177475	XP_054992194.1	HSD3B7	-
0.125164	0.21819	XP_054992207.1	CHMP5	+
0.28222	-0.373841	XP_054992213.1	QKI	-
1.14731	1.6838	XP_054992245.1	IQGAP2	+
0.347438	0.530827	XP_054992303.1	MAP7	+
0.169012	-0.426967	XP_054992428.1	TCP1	-
0.54661	0.631327	XP_054992441.1	GCLC	+
1.45488	-0.867572	XP_054992444.1	MARCKS	-
0.933835	-1.0244	XP_054992482.1	ELOB	-
0.492693	0.80269	XP_054992497.1	SLC38A3	+
1.16909	-0.618541	XP_054992567.1	EIF4H	-
0.145015	0.0980167	XP_054992595.1	RPN1	+
0.280107	-0.197166	XP_054992638.1	ME1	-
0.218268	0.600138	XP_054992683.1	SH3BGRL2	+
0.0233801	0.0310478	XP_054992728.1	PLG	+
0.128174	-0.191856	XP_054992806.1	PMM2	-
0.171278	-0.10463	XP_054992841.1	ALDOA	-
2.14636	-0.569556	XP_054992874.1	TKT	-
0.0458722	0.0821194	XP_054993265.1	PICALM	+
0.195874	-0.174345	XP_054992981.1	RPS15A	-
0.00984436	-0.0172642	XP_054993001.1	DECR2	-
0.557537	1.5192	XP_054993034.1	VWA8	+
0.0750908	-0.104301	XP_054993052.1	DHRS7B	-
0.655354	-0.414281	XP_054993059.1	SOD2	-
0.210049	0.24255	XP_054993130.1	ACAD11	+
1.57066	0.332163	XP_054993131.1	MDH2	+
0.84371	-0.278501	XP_054997768.1	RPLP2	-
0.31833	-0.479427	XP_054993249.1	RPS27L	-
0.488762	-0.323617	XP_054993270.1	UFM1	-
0.0158109	-0.0174816	XP_054993389.1	CTSZ	-
1.07354	-0.451576	XP_054993395.1	PSMA7	-
0.0130623	0.0528782	XP_054993466.1	SNCA	+
1.9456	-0.829915	XP_054993501.1	TOP1	-
0.344868	0.243319	XP_054993506.1	CAPZB	+
0.110754	-0.103071	XP_054993568.1	RPL22	-
0.850977	-0.110653	XP_054993572.1	PARK7	-
1.732	-0.848904	XP_054993576.1	VAMP3	-
0.782511	0.577431	XP_054993593.1	PGM1	+
2.09914	-1.96595	XP_054993629.1	UBAP2L	-
0.524605	0.312314	XP_054993634.1	HAX1	+
0.86713	-0.346716	XP_054993812.1	UBE2V1	-
0.0855908	0.202192	XP_054993842.1	CCT5	+
0.068043	-0.104858	XP_054993873.1	LZIC	-
0.501644	-0.107892	XP_054993926.1	PRDX1	-
0.137468	-0.242364	XP_054994091.1	DHX15	-
0.439176	-0.221572	XP_054994214.1	RPL5	-
0.589299	-0.434985	XP_054994254.1	CALD1	-
0.139722	0.183346	XP_054994495.1	CCDC167	+
0.218644	0.140207	XP_054994591.1	GSS	+
1.05101	0.43446	XP_054994670.1	CTH	+
0.427715	-0.421093	XP_054994673.1	HNRNPDL	-
0.575115	-0.367782	XP_054994696.1	RPS21	-
0.655729	0.619431	XP_054994773.1	ASS1	+
2.68426	-0.984138	XP_054994868.1	EIF3I	-
0.448502	-0.76928	XP_054994900.1	RCC2	-
0.647621	-0.520506	XP_054994929.1	ALPL	-
1.00046	-1.13504	XP_054994947.1	GID8	-
0.0607451	-0.0703167	XP_054994957.1	KHDRBS1	-
0.516358	0.448172	XP_054994961.1	ATP1A1	+
0.0192902	0.0252373	XP_054994972.1	DNAJC3	+
1.22601	-1.22893	XP_054994985.1	HP1BP3	-
0.531381	-0.522996	XP_054995027.1	RARRES2	-
1.71243	-1.00128	XP_054995035.1	TXLNA	-
0.310834	-0.448011	XP_054995051.1	CCAR1	-
0.454729	0.244548	XP_054995080.1	LETM1	+
0.225121	-0.398468	XP_054995084.1	SEC31A	-
0.401459	-0.263931	XP_054995160.1	RPS8	-
1.30832	-0.557073	XP_054995182.1	YWHAB	-
0.655882	-0.420929	XP_054995184.1	FKBP1A	-
0.383165	-0.414163	XP_054995218.1	SRSF6	-
1.63917	-0.715685	XP_054995237.1	NSFL1C	-
2.08457	-1.17332	XP_054995308.1	TINAGL1	-
0.417832	1.00176	XP_054995312.1	ERICH3	+
2.02536	-1.44143	XP_054995323.1	DYNLRB1	-
0.630256	0.310951	XP_054995351.1	TGM2	+
0.306618	-0.397336	XP_054995390.1	CDC42	-
0.108557	0.224869	XP_054995520.1	SEPTIN11	+
1.89616	-0.399898	XP_054995567.1	RPL9	-
0.407105	-0.780992	XP_054995601.1	WASF2	-
0.711943	1.729	XP_054995655.1	ISG15	+
0.021708	-0.0237629	XP_054995656.1	WDR1	-
0.167464	0.281588	XP_054995657.1	GC	+
0.389997	-0.248205	XP_054995671.1	SFPQ	-
0.204973	-0.0937435	XP_054995756.1	PHYHD1	-
0.533075	0.754245	XP_054995782.1	HSPG2	+
0.192709	-0.200904	XP_054995798.1	TMED5	-
0.03781	-0.140559	XP_054995809.1	S100A13	-
0.178634	-0.114462	XP_054996030.1	SCP2	-
1.37132	1.78679	XP_054996130.1	SLC16A1	+
0.0963477	-0.0891548	XP_054996158.1	YBX1	-
0.537013	-0.494635	XP_054996161.1	C5H1orf50	-
0.339248	-0.471228	XP_054996217.1	S100A6	-
0.0379482	-0.032394	XP_054996248.1	QDPR	-
1.11465	-0.558742	XP_054996252.1	SDF4	-
1.77305	2.99242	XP_054996258.1	CSE1L	+
0.215593	-0.227045	XP_054996327.1	EFHD2	-
0.244588	-0.141141	XP_054996333.1	SDHB	-
0.277275	0.509087	XP_054996347.1	CCT3	+
0.649275	1.45862	XP_054996367.1	USO1	+
0.692136	-0.898252	XP_054996375.1	G3BP2	-
0.0950548	-0.144515	XP_054996421.1	TOMM34	-
1.80568	-1.52182	XP_054996491.1	GNG12	-
0.102092	-0.0920403	XP_054996493.1	PGD	-
1.02878	-0.85484	XP_054996494.1	PEX14	-
1.86821	-0.600885	XP_054996509.1	HNRNPD	-
0.361731	-0.659283	XP_054996568.1	PDLIM5	-
0.0434745	0.0341507	XP_054996580.1	LAP3	+
0.95561	-0.913078	XP_054996599.1	PFDN4	-
2.27685	-1.43846	XP_054996637.1	CENPV	-
0.863355	-0.781278	XP_054996677.1	PEF1	-
0.499465	1.06281	XP_054996733.1	SARS1	+
0.170822	0.110432	XP_054996743.1	EMB	+
0.138888	-0.240966	XP_054996778.1	EPB41	-
0.211427	-0.610683	XP_054996811.1	HSD17B11	-
0.132054	0.0926388	XP_054996990.1	TKFC	+
1.78729	-0.889688	XP_054997002.1	ARFGAP2	-
0.271693	0.307495	XP_054997011.1	GANAB	+
0.883076	1.23992	XP_054997012.1	AHNAK	+
0.851888	-1.36671	XP_054997016.1	FADS1	-
0.230284	-0.255914	XP_054997034.1	HDGFL3	-
0.175859	-0.368755	XP_054997039.1	CAPZA2	-
0.610653	-0.500235	XP_054997114.1	DDX17	-
0.834747	-0.872385	XP_054997136.1	PDXP	-
1.39323	-0.519815	XP_054997152.1	TOMM22	-
0.513972	-0.601108	XP_054997292.1	TJP1	-
0.0176741	0.0111446	XP_054997469.1	HSPA9	+
1.00687	1.15506	XP_054997514.1	SDHAF2	+
0.440628	0.684721	XP_054997585.1	PC	+
0.215529	-0.355944	XP_054997617.1	CTSC	-
0.652562	-0.358904	XP_054997618.1	TPI1	-
1.31826	-0.621402	XP_054997633.1	HMGB1	-
0.376992	-0.558598	XP_054997652.1	SF1	-
0.132015	0.238654	XP_054997723.1	MYH9	+
0.667344	0.993057	XP_054997767.1	SLC25A22	+
1.28172	-0.467589	XP_054997785.1	TALDO1	-
0.0158901	-0.0184093	XP_054997858.1	SPTAN1	-
0.886953	0.290405	XP_054997911.1	PHB2	+
1.25041	-0.951029	XP_054997928.1	CAPRIN1	-
0.0621538	-0.161427	XP_054997953.1	UBE2D3	-
0.182307	-0.185468	XP_054997999.1	PTMS	-
0.456123	-0.587799	XP_054998014.1	SELENOS	-
0.304494	0.166449	XP_054998058.1	TST	+
0.0565239	0.060078	XP_054998060.1	HADH	+
1.23416	-0.989931	XP_054998066.1	FTH1	-
0.403053	0.499754	XP_054998079.1	SAMM50	+
0.0917384	-0.15344	XP_054998135.1	SNRPA1	-
1.75248	-1.82062	XP_054998142.1	SVIP	-
0.723435	0.509555	XP_054998182.1	CTSD	+
0.362674	-0.194026	XP_054998193.1	MPST	-
1.23722	0.97021	XP_054998204.1	EIF3F	+
0.483239	-0.961743	XP_054998277.1	MCEE	-
0.0457243	0.0531673	XP_054998306.1	UBXN1	+
0.639085	-1.28857	XP_054998415.1	PVALB	-
0.144034	0.316597	XP_054998433.1	ADH7	+
0.644092	-0.196064	XP_054998443.1	PRDX5	-
0.777048	1.1883	XP_054998450.1	SERPING1	+
0.616085	1.06619	XP_054998582.1	PURA	+
0.731265	-0.471804	XP_054998607.1	DRAP1	-
0.261265	-0.66847	XP_054998628.1	PCBD2	-
0.688202	-0.757421	XP_054998710.1	SNU13	-
1.29689	1.66396	XP_054998737.1	PLXNB2	+
2.19884	2.41379	XP_054998746.1	MTCH2	+
0.322401	0.638343	XP_054998830.1	TCOF1	+
0.0430772	0.0942146	XP_054998897.1	SLC38A4	+
0.0400319	0.160923	XP_054998913.1	UGT8	+
0.844566	-0.584907	XP_054998973.1	RCN1	-
0.329596	-0.253645	XP_054998989.1	NAP1L4	-
1.91596	-1.45154	XP_054999035.1	TMEM109	-
0.774836	-0.4054	XP_054999067.1	CTTN	-
3.01371	-1.0281	XP_054999082.1	SF3B2	-
0.775926	0.63818	XP_054999155.1	VDAC3	+
0.0518969	-0.0631809	XP_054999173.1	TWF1	-
1.06055	0.791941	XP_054999216.1	LDHA	+
0.908379	-0.441414	XP_054999323.1	PPA2	-
0.724211	0.504087	XP_054999370.1	RPL27A	+
0.0171996	0.0419193	XP_054999439.1	DHCR7	+
0.529317	0.579277	XP_054999572.1	CD163	+
0.250509	0.536896	XP_054999861.1	SPTBN2	+
0.202687	0.169823	XP_054999916.1	RPL34	+
0.299535	-0.246009	XP_054999919.1	ETNPPL	-
0.112561	0.0771435	XP_055000012.1	PPP1CA	+
0.926368	0.621215	XP_055000095.1	CPT1A	+
0.397525	-1.1567	XP_055000404.1	NUCKS1	-
1.01682	-0.49718	XP_055000442.1	CCAR2	-
0.117488	0.206735	XP_055000535.1	CFH	+
1.79907	-0.674302	XP_055000539.1	PIGR	-
0.0354208	0.0319141	XP_055000561.1	ANXA5	+
0.643088	0.403811	XP_055000643.1	FGB	+
0.443839	-0.602459	XP_055000737.1	ATP6V1B2	-
0.944603	-0.654294	XP_055000758.1	SRSF3	-
0.861366	0.775808	XP_055000941.1	LSM6	+
0.194612	-0.173992	XP_055000975.1	RPL18	-
0.356462	0.558998	XP_055001202.1	DPYD	+
0.343611	-0.297449	XP_055001205.1	CDH11	-
0.891597	0.667707	XP_055001357.1	A1BG	+
0.0708303	0.0960476	XP_055001411.1	ACTN4	+
0.266016	0.143741	XP_055001420.1	HNRNPL	+
0.400735	-0.182162	XP_055001434.1	CEACAM1	-
2.18142	2.44057	XP_055001480.1	AGL	+
2.83043	-1.48113	XP_055001485.1	CES1	-
0.404912	-0.656705	XP_055001496.1	DNAJA2	-
0.357547	-0.247828	XP_055001542.1	HSBP1	-
0.401553	0.858154	XP_055001571.1	MLYCD	+
0.311424	0.236064	XP_055001756.1	RPL13	+
0.815634	-0.794261	XP_055001764.1	GCSH	-
0.68949	-0.36951	XP_055001774.1	APOE	-
0.00656564	0.0119476	XP_055001793.1	TPPP3	+
1.82901	1.27125	XP_055001961.1	TAT	+
0.677167	-0.80252	XP_055002095.1	DPEP1	-
0.0348019	-0.0934254	XP_055002112.1	COL4A1	-
0.769546	-1.13377	XP_055002167.1	NUCB1	-
0.622166	0.908199	XP_055002170.1	CIAPIN1	+
0.369526	0.556725	XP_055002191.1	CA5A	+
1.03489	-0.57655	XP_055002231.1	NUTF2	-
1.6535	-0.792318	XP_055002292.1	PDCD5	-
0.217419	-0.449214	XP_055002318.1	PSMD7	-
0.096593	0.101149	XP_055002328.1	C9	+
2.54938	-0.9554	XP_055002329.1	APOC4	-
0.931382	-0.681676	XP_055002351.1	CFDP1	-
0.321331	-0.359581	XP_055002469.1	GSN	-
0.234468	0.308191	XP_055002570.1	NADK2	+
0.576278	-0.635478	XP_055002587.1	ACAD10	-
0.589181	-0.782732	XP_055002593.1	ATP2A2	-
0.93267	-1.18853	XP_055002620.1	RAB35	-
1.1571	-1.49877	XP_055002622.1	SRSF9	-
0.414108	0.822851	XP_055002796.1	ACBD5	+
0.795565	0.879249	XP_055002954.1	ECHDC3	+
1.7815	-1.04056	XP_055002965.1	AGT	-
0.343658	-0.198522	XP_055002994.1	YWHAH	-
0.0520029	0.0338135	XP_055003001.1	DIABLO	+
1.42399	-0.61361	XP_055003012.1	ITGB1	-
0.807769	1.44402	XP_055003018.1	GDI2	+
0.506467	0.680357	XP_055003057.1	MRC1	+
0.0598228	0.0463673	XP_055003117.1	ACADS	+
1.26058	-0.535413	XP_055003122.1	ARPC3	-
0.0606597	0.0590004	XP_055003129.1	EPHX1	+
0.0479181	-0.0627575	XP_055003144.1	AGXT2	-
0.549025	0.398925	XP_055003189.1	SEC14L2	+
0.0109314	-0.0239254	XP_055003191.1	PITPNB	-
1.09753	-1.63368	XP_055003254.1	SF3A1	-
0.367414	0.569014	XP_055003261.1	PXN	+
0.776712	0.767673	XP_055003262.1	ALDH2	+
0.963258	2.50604	XP_055003263.1	DHTKD1	+
0.0321517	0.0185349	XP_055003325.1	PPP1CC	+
0.462298	0.250449	XP_055003328.1	ATP5F1C	+
4.01845	-0.806795	XP_055003377.1	SRP9	-
0.36237	0.321571	XP_055003475.1	TOMM20	+
1.90792	1.20511	XP_055003477.1	PHYH	+
0.0541705	0.0387535	XP_055003580.1	SDHA	+
1.05056	-0.420048	XP_055003627.1	RAN	-
0.323018	-0.36436	XP_055003628.1	TMED2	-
0.311043	-0.37633	XP_055003639.1	NID1	-

## Sheet: Pathway Enrichment
Count	Pathway	pval	padj	log2err	ES	NES	Size	Leading Edge
1	KEGG_STARCH_AND_SUCROSE_METABOLISM	1.54938e-05	0.00257197	0.57561	0.832138	2.33746	12	c("AGL", "PYGL", "GBE1", "GYS2", "ENPP3", "PGM1")
2	KEGG_CITRATE_CYCLE_TCA_CYCLE	7.38018e-05	0.00612555	0.538434	0.676179	2.27704	22	c("MDH2", "PDHA1", "SUCLG2", "SUCLA2", "SUCLG1", "ACO2", "ACO1", "DLST", "DLD", "PCK1", "OGDH", "PC")
3	KEGG_CYSTEINE_AND_METHIONINE_METABOLISM	0.00043175	0.0238901	0.498493	0.761863	2.14006	12	c("TAT", "CBS", "LDHA", "CTH", "GOT2", "CDO1", "AHCY", "MAT1A", "ADI1", "GOT1")
4	KEGG_GLYOXYLATE_AND_DICARBOXYLATE_METABOLISM	0.00215449	0.0510922	0.431708	0.776742	2.01927	9	c("MDH2", "HYI", "ACO2", "AFMID", "ACO1", "MTHFD1")
5	KEGG_VALINE_LEUCINE_AND_ISOLEUCINE_DEGRADATION	0.00130392	0.0438529	0.45506	0.514528	1.93007	33	c("HADHA", "HADHB", "ALDH6A1", "AUH", "ACAD8", "ACAA2", "ACADM", "ALDH2", "HIBADH", "DLD", "AOX1", "PCCA", "MMUT", "ECHS1", "EHHADH")
6	KEGG_ALANINE_ASPARTATE_AND_GLUTAMATE_METABOLISM	0.00572232	0.107287	0.407018	0.618713	1.88564	16	c("GOT2", "CPS1", "ALDH4A1", "AGXT", "ASS1", "GPT", "ASL", "GOT1", "GLS2", "ALDH5A1", "ABAT")
7	KEGG_SPHINGOLIPID_METABOLISM	0.00891033	0.132728	0.38073	0.844738	1.8048	5	c("GLB1", "GLA", "ASAH1", "UGT8")
8	KEGG_PROPANOATE_METABOLISM	0.0061285	0.107287	0.407018	0.523548	1.79335	23	c("HADHA", "ALDH6A1", "SUCLG2", "SUCLA2", "LDHA", "ACADM", "SUCLG1", "ALDH2", "PCCA", "MMUT", "ECHS1", "EHHADH", "MLYCD", "ACSS3", "ACSS1", "PCCB")
9	KEGG_GLYCINE_SERINE_AND_THREONINE_METABOLISM	0.0167192	0.213491	0.352488	0.569842	1.7367	16	c("CBS", "CTH", "DMGDH", "AGXT", "DLD", "GNMT", "AMT", "GLDC", "SARDH", "SHMT1")
10	KEGG_ONE_CARBON_POOL_BY_FOLATE	0.0447209	0.385324	0.321776	0.747095	1.6943	6	c("ALDH1L1", "FTCD", "MTHFD1", "AMT", "SHMT1")
11	KEGG_ADIPOCYTOKINE_SIGNALING_PATHWAY	0.0263423	0.291521	0.352488	0.792123	1.69239	5	c("ACSL1", "CPT1A", "CD36", "PCK1", "ACSL5")
12	KEGG_BIOSYNTHESIS_OF_UNSATURATED_FATTY_ACIDS	0.036506	0.35647	0.321776	0.708382	1.68879	7	c("PECR", "HADHA", "BAAT", "HSD17B12")
13	KEGG_GALACTOSE_METABOLISM	0.0464245	0.385324	0.321776	0.744614	1.68867	6	c("GLB1", "PGM1", "GLA", "UGP2", "GAA")
14	KEGG_FATTY_ACID_METABOLISM	0.00646307	0.107287	0.407018	0.481549	1.68197	27	c("HADHA", "ECI2", "HADHB", "ACSL1", "CPT1A", "ACAA2", "ACADM", "CPT2", "ALDH2")
15	KEGG_COMPLEMENT_AND_COAGULATION_CASCADES	0.0259998	0.291521	0.352488	0.575829	1.6705	13	c("C5", "SERPING1", "FGB", "FGG", "FGA", "CFB")
16	KEGG_PRIMARY_BILE_ACID_BIOSYNTHESIS	0.0388312	0.35811	0.321776	0.659217	1.63184	8	c("BAAT", "SLC27A5", "HSD17B4", "ACOX2")
17	KEGG_NICOTINATE_AND_NICOTINAMIDE_METABOLISM	0.0898835	0.497356	0.287805	0.685725	1.55512	6	c("ENPP3", "QPRT", "AOX1", "NNMT")
18	KEGG_PANTOTHENATE_AND_COA_BIOSYNTHESIS	0.0860215	0.492399	0.252961	0.701466	1.4987	5	c("ENPP3", "DPYS", "DPYD", "ENPP1")
19	KEGG_OTHER_GLYCAN_DEGRADATION	0.0647482	0.433606	0.276501	0.855467	1.4914	3	c("GLB1", "MAN2B1")
20	KEGG_PROXIMAL_TUBULE_BICARBONATE_RECLAMATION	0.0990916	0.511087	0.287805	0.555155	1.48777	10	c("ATP1B1", "SLC25A10", "ATP1A1", "SLC38A3", "PCK1", "GLS2")
21	KEGG_NITROGEN_METABOLISM	0.0653021	0.433606	0.287805	0.525928	1.47732	12	c("CTH", "CPS1", "HAL", "AMT", "CA5A", "GLS2")
22	KEGG_N_GLYCAN_BIOSYNTHESIS	0.102151	0.511087	0.231127	0.691205	1.47678	5	c("DDOST", "RPN2", "GANAB", "RPN1")
23	KEGG_LONG_TERM_DEPRESSION	0.0695444	0.444014	0.266351	0.846828	1.47634	3	c("PPP2R1A", "PPP2CB", "KRAS")
24	KEGG_LYSOSOME	0.0347775	0.35647	0.321776	0.388601	1.42324	31	c("CD68", "GLB1", "CTSA", "CLTC", "NPC1", "GLA", "TPP1", "CTSD", "CTSB", "NAGLU", "LGMN")
25	KEGG_PPAR_SIGNALING_PATHWAY	0.0597761	0.431428	0.321776	0.411351	1.40903	23	c("SLC27A5", "ACSL1", "FABP1", "CPT1A", "ACADM", "CPT2", "CD36", "PCK1", "EHHADH")
26	KEGG_GLYCOLYSIS_GLUCONEOGENESIS	0.053963	0.407175	0.321776	0.396821	1.38603	27	c("PDHA1", "FBP1", "LDHA", "AKR1A1", "PGM1", "ALDH2", "DLD", "PCK1", "ALDOB", "GALM", "ACSS1")
27	KEGG_WNT_SIGNALING_PATHWAY	0.146667	0.561979	0.213928	0.53007	1.37801	9	c("CACYBP", "PPP2R1A", "PPP2CB", "RAC1")
28	KEGG_VALINE_LEUCINE_AND_ISOLEUCINE_BIOSYNTHESIS	0.0855856	0.492399	0.231127	0.900714	1.35821	2	c("PDHA1", "PDHB")
29	KEGG_RNA_DEGRADATION	0.174731	0.591946	0.173748	0.627345	1.34034	5	c("LSM6", "LSM2", "ENO1")
30	KEGG_PYRUVATE_METABOLISM	0.10468	0.511087	0.287805	0.398002	1.34028	22	c("MDH2", "PDHA1", "LDHA", "ALDH2", "ACYP2", "DLD", "PCK1", "PC", "ACSS1")
31	KEGG_PEROXISOME	0.108934	0.516658	0.287805	0.353325	1.33251	34	c("PECR", "PHYH", "BAAT", "ECI2", "ECH1", "ACSL1")
32	KEGG_PENTOSE_AND_GLUCURONATE_INTERCONVERSIONS	0.185484	0.595753	0.168238	0.61916	1.32285	5	c("UGP2", "GUSB", "DHDH", "DCXR", "UGDH")
33	KEGG_GLYCOSAMINOGLYCAN_DEGRADATION	0.206235	0.595753	0.149208	0.74976	1.30712	3	c("GLB1", "NAGLU", "GUSB")
34	KEGG_TGF_BETA_SIGNALING_PATHWAY	0.193548	0.595753	0.164406	0.611561	1.30662	5	c("PPP2R1A", "PPP2CB")
35	KEGG_BETA_ALANINE_METABOLISM	0.147601	0.561979	0.224966	0.432368	1.27843	14	c("HADHA", "ACADM", "ALDH2", "DPYS", "ECHS1", "EHHADH", "MLYCD", "DPYD")
36	KEGG_CARDIAC_MUSCLE_CONTRACTION	0.195467	0.595753	0.168238	0.562268	1.27514	6	c("ATP1B1", "TPM4", "ATP1A1", "TPM2", "ACTC1")
37	KEGG_TYROSINE_METABOLISM	0.16835	0.582211	0.199915	0.448946	1.26108	12	c("TAT", "HPD", "GOT2", "AOX1", "HGD", "GOT1")
38	KEGG_LYSINE_DEGRADATION	0.152344	0.561979	0.227987	0.412899	1.25838	16	c("HADHA", "AASS", "ALDH2", "DLST", "ECHS1", "OGDH", "EHHADH")
39	KEGG_GLYCOSPHINGOLIPID_BIOSYNTHESIS_GANGLIO_SERIES	0.103314	0.511087	0.193813	0.960784	1.24845	1	GLB1
40	KEGG_BUTANOATE_METABOLISM	0.142259	0.561979	0.245042	0.386648	1.24465	19	c("HADHA", "PDHA1", "ACSM1", "ALDH2", "ECHS1", "EHHADH", "ALDH5A1", "ALDH7A1", "HMGCS2", "ABAT")
41	KEGG_ABC_TRANSPORTERS	0.130604	0.556798	0.170932	0.948439	1.23241	1	ABCA6
42	KEGG_SELENOAMINO_ACID_METABOLISM	0.219745	0.597995	0.168238	0.493203	1.22089	8	c("CBS", "CTH", "AHCY", "MAT1A")
43	KEGG_PROGESTERONE_MEDIATED_OOCYTE_MATURATION	0.270983	0.622613	0.128143	0.698182	1.2172	3	c("KRAS", "HSP90AB1", "HSP90AA1")
44	KEGG_INSULIN_SIGNALING_PATHWAY	0.18677	0.595753	0.204295	0.403772	1.21615	15	c("PYGL", "GYS2", "FBP1")
45	KEGG_RIG_I_LIKE_RECEPTOR_SIGNALING_PATHWAY	0.28777	0.622613	0.123842	0.689455	1.20198	3	c("ISG15", "TKFC", "MAVS")
46	KEGG_COLORECTAL_CANCER	0.309353	0.633982	0.118815	0.680974	1.1872	3	c("RAC1", "KRAS", "RHOA")
47	KEGG_PRION_DISEASES	0.274194	0.622613	0.135741	0.555504	1.18685	5	c("C5", "C9")
48	KEGG_MATURITY_ONSET_DIABETES_OF_THE_YOUNG	0.324324	0.640927	0.111463	0.777666	1.17267	2	c("HNF1A", "PKLR")
49	KEGG_GLYCOSPHINGOLIPID_BIOSYNTHESIS_GLOBO_SERIES	0.324324	0.640927	0.111463	0.777616	1.17259	2	c("GLA", "NAGA")
50	KEGG_GLYCEROLIPID_METABOLISM	0.279221	0.622613	0.149208	0.417546	1.11899	10	c("LIPC", "AKR1A1", "ALDH2", "GLA")
51	KEGG_SYSTEMIC_LUPUS_ERYTHEMATOSUS	0.289809	0.622613	0.144631	0.447825	1.10856	8	c("C5", "SNRPD1", "ACTN3", "C9", "ACTN4")
52	KEGG_TAURINE_AND_HYPOTAURINE_METABOLISM	0.376499	0.669205	0.10592	0.635293	1.10756	3	c("BAAT", "CDO1")
53	KEGG_MELANOGENESIS	0.52027	0.807148	0.0833634	0.681039	1.02696	2	c("KRAS", "CALM3")
54	KEGG_ALDOSTERONE_REGULATED_SODIUM_REABSORPTION	0.475827	0.759493	0.095288	0.52524	1.01307	4	c("ATP1B1", "ATP1A1", "KRAS")
55	KEGG_HISTIDINE_METABOLISM	0.425743	0.700805	0.118815	0.362672	0.997984	11	c("UROC1", "FTCD", "ALDH2", "AMDHD1", "HAL")
56	KEGG_INOSITOL_PHOSPHATE_METABOLISM	0.565315	0.835319	0.078921	0.645307	0.973077	2	ALDH6A1
57	KEGG_TRYPTOPHAN_METABOLISM	0.490196	0.774977	0.137251	0.277245	0.95168	25	c("HADHA", "HAAO", "ALDH2", "AFMID", "AOX1", "TDO2", "KMO", "ECHS1", "OGDH", "EHHADH")
58	KEGG_MELANOMA	0.594542	0.835319	0.0689567	0.7313	0.950259	1	KRAS
59	KEGG_SULFUR_METABOLISM	0.53717	0.818643	0.0850427	0.54024	0.941843	3	SUOX
60	KEGG_THYROID_CANCER	0.599099	0.835319	0.0758887	0.622135	0.938136	2	c("KRAS", "TFG")
61	KEGG_P53_SIGNALING_PATHWAY	0.612613	0.835319	0.0747385	0.616952	0.93032	2	c("STEAP3", "SFN")
62	KEGG_DNA_REPLICATION	0.682261	0.857995	0.062249	0.691358	0.898358	1	SSBP1
63	KEGG_HOMOLOGOUS_RECOMBINATION	0.682261	0.857995	0.062249	0.691358	0.898358	1	SSBP1
64	KEGG_MISMATCH_REPAIR	0.682261	0.857995	0.062249	0.691358	0.898358	1	SSBP1
65	KEGG_CYTOSOLIC_DNA_SENSING_PATHWAY	0.690058	0.861276	0.0617054	0.688453	0.894584	1	MAVS
66	KEGG_SMALL_CELL_LUNG_CANCER	0.572519	0.835319	0.0847985	0.459866	0.886977	4	c("FHIT", "COL4A1")
67	KEGG_LIMONENE_AND_PINENE_DEGRADATION	0.627389	0.846719	0.0922597	0.349794	0.865889	8	c("HADHA", "ALDH2", "ECHS1", "EHHADH")
68	KEGG_ARGININE_AND_PROLINE_METABOLISM	0.72549	0.8907	0.109684	0.25204	0.865159	25	c("GOT2", "PRODH", "CPS1", "ALDH2", "ALDH4A1", "ASS1", "AGMAT", "ASL", "GOT1", "GLS2", "ALDH7A1", "OTC")
69	KEGG_NON_SMALL_CELL_LUNG_CANCER	0.613909	0.835319	0.077884	0.487454	0.849817	3	c("FHIT", "KRAS")
70	KEGG_NEUROACTIVE_LIGAND_RECEPTOR_INTERACTION	0.673423	0.857995	0.0699459	0.56032	0.844923	2	c("PLG", "F2")
71	KEGG_NOTCH_SIGNALING_PATHWAY	0.675676	0.857995	0.0697793	0.557413	0.840539	2	c("NCSTN", "NUMB")
72	KEGG_PANCREATIC_CANCER	0.698925	0.865832	0.0770737	0.365623	0.781162	5	c("RAC1", "KRAS", "RALB", "CDC42", "RALA")
73	KEGG_RETINOL_METABOLISM	0.72973	0.8907	0.0659816	0.516715	0.77917	2	c("ADH7", "ALDH1A1")
74	KEGG_OLFACTORY_TRANSDUCTION	0.904483	0.968673	0.049094	0.578068	0.751148	1	CALM3
75	KEGG_PHOSPHATIDYLINOSITOL_SIGNALING_SYSTEM	0.904483	0.968673	0.049094	0.578068	0.751148	1	CALM3
76	KEGG_STEROID_HORMONE_BIOSYNTHESIS	0.79955	0.940778	0.0615707	0.478927	0.722188	2	c("HSD17B12", "AKR1D1")
77	KEGG_TERPENOID_BACKBONE_BIOSYNTHESIS	0.800959	0.940778	0.0645031	0.405818	0.707495	3	c("HMGCS2", "FDPS")
78	KEGG_TOLL_LIKE_RECEPTOR_SIGNALING_PATHWAY	0.824324	0.956908	0.0601186	0.463341	0.698686	2	c("RAC1", "TOLLIP")
79	KEGG_BASAL_TRANSCRIPTION_FACTORS	0.996101	0.997462	0.0446854	0.501816	0.652065	1	GTF2A1
80	KEGG_PROTEASOME	0.960784	0.996814	0.0925529	0.188772	0.647986	25	c("PSMD2", "PSMB5", "PSMD4", "PSMA6", "PSMC2", "PSMC1")
81	KEGG_TYPE_II_DIABETES_MELLITUS	0.887387	0.962786	0.0566484	0.425872	0.642185	2	c("PKM", "PKLR")
82	KEGG_HEMATOPOIETIC_CELL_LINEAGE	0.882494	0.962786	0.0598603	0.360415	0.62834	3	c("CD36", "ITGA1")
83	KEGG_NOD_LIKE_RECEPTOR_SIGNALING_PATHWAY	0.885496	0.962786	0.0625237	0.323144	0.623271	4	c("HSP90AB1", "HSP90AA1", "HSP90B1")
84	KEGG_VIRAL_MYOCARDITIS	0.943114	0.984635	0.0673624	0.247994	0.591219	7	c("RAC1", "ACTG1", "MYH9")
85	KEGG_BLADDER_CANCER	0.941441	0.984635	0.0538979	0.383721	0.578624	2	c("KRAS", "TYMP")
86	KEGG_AMINOACYL_TRNA_BIOSYNTHESIS	0.938172	0.984635	0.0623861	0.263656	0.563308	5	c("SARS1", "WARS1", "EPRS1")
87	KEGG_METABOLISM_OF_XENOBIOTICS_BY_CYTOCHROME_P450	0.979042	0.997462	0.0655321	0.227571	0.54253	7	c("MGST1", "GSTZ1", "ADH7", "GSTK1", "DHDH", "EPHX1")
88	KEGG_FRUCTOSE_AND_MANNOSE_METABOLISM	0.984076	0.997462	0.0683111	0.211052	0.522444	8	c("FBP1", "ALDOB")
89	KEGG_VEGF_SIGNALING_PATHWAY	0.995378	0.997462	0.0338245	-0.237482	-0.454365	6	c("PPP3R1", "CHP1")
90	KEGG_TIGHT_JUNCTION	0.997462	0.997462	0.0238623	-0.175158	-0.469038	22	c("F11R", "YBX3", "CTTN", "VAPA", "TJP1", "CSNK2B")
91	KEGG_DRUG_METABOLISM_CYTOCHROME_P450	0.970085	0.997462	0.0312771	-0.246435	-0.531616	9	c("MAOB", "MGST3")
92	KEGG_PYRIMIDINE_METABOLISM	0.873547	0.962786	0.0372254	-0.32028	-0.670342	8	CMPK1
93	KEGG_RIBOFLAVIN_METABOLISM	0.885714	0.962786	0.0406579	-0.36896	-0.674455	5	c("ACP1", "ACP5")
94	KEGG_AXON_GUIDANCE	0.866667	0.962786	0.0354665	-0.29141	-0.696671	13	c("ITGB1", "CFL1", "PPP3R1", "CHP1")
95	KEGG_GAP_JUNCTION	0.844477	0.962786	0.0387962	-0.334754	-0.700637	8	GRB2
96	KEGG_GLUTATHIONE_METABOLISM	0.859249	0.962786	0.0341946	-0.281966	-0.700917	16	c("GPX1", "GGT1", "MGST3")
97	KEGG_ALPHA_LINOLENIC_ACID_METABOLISM	0.928425	0.984635	0.0500923	-0.533769	-0.716643	1	ACOX1
98	KEGG_RENIN_ANGIOTENSIN_SYSTEM	0.861538	0.962786	0.0453152	-0.461954	-0.729875	3	AGT
99	KEGG_ANTIGEN_PROCESSING_AND_PRESENTATION	0.832215	0.959359	0.0357691	-0.296534	-0.730871	15	c("PSME1", "B2M", "CANX", "PDIA3", "HSPA8", "HSPA5")
100	KEGG_FC_EPSILON_RI_SIGNALING_PATHWAY	0.804762	0.940778	0.0450443	-0.414943	-0.758511	5	c("GRB2", "FCER1A", "FCER1G")
101	KEGG_CALCIUM_SIGNALING_PATHWAY	0.779685	0.931135	0.0417397	-0.3401	-0.773003	11	c("PPP3R1", "CHP1", "VDAC1", "ATP2A2")
102	KEGG_PENTOSE_PHOSPHATE_PATHWAY	0.753561	0.909036	0.0431037	-0.362366	-0.781705	9	c("TKT", "TALDO1")
103	KEGG_OOCYTE_MEIOSIS	0.755705	0.909036	0.0402478	-0.319311	-0.787009	15	c("YWHAB", "YWHAE", "PPP3R1", "PPP1CB", "CHP1", "YWHAZ", "YWHAG", "YWHAH", "SKP1", "YWHAQ")
104	KEGG_NATURAL_KILLER_CELL_MEDIATED_CYTOTOXICITY	0.679641	0.857995	0.0500923	-0.430462	-0.863917	7	c("GRB2", "PPP3R1", "CHP1", "FCER1G")
105	KEGG_MAPK_SIGNALING_PATHWAY	0.639716	0.849543	0.0503964	-0.375698	-0.877307	12	c("GNG12", "GRB2", "RAP1B", "PPP3R1", "CHP1", "HSPA8")
106	KEGG_PHENYLALANINE_METABOLISM	0.636752	0.849543	0.0508054	-0.409394	-0.883154	9	c("PRDX6", "MIF", "MAOB")
107	KEGG_STEROID_BIOSYNTHESIS	0.654741	0.857995	0.0601186	-0.614832	-0.900517	2	LIPA
108	KEGG_ADHERENS_JUNCTION	0.583333	0.835319	0.053677	-0.380628	-0.909963	13	c("ACP1", "SORBS1", "BAIAP2", "TJP1", "CSNK2B", "WASF2")
109	KEGG_VASOPRESSIN_REGULATED_WATER_REABSORPTION	0.606287	0.835319	0.0553643	-0.461007	-0.925218	7	c("DYNLL2", "ARHGDIA", "RAB5C")
110	KEGG_ASCORBATE_AND_ALDARATE_METABOLISM	0.599384	0.835319	0.0572461	-0.484433	-0.926845	6	c("ALDH1B1", "ALDH9A1", "ALDH3A2")
111	KEGG_PURINE_METABOLISM	0.582447	0.835319	0.0517405	-0.366819	-0.930723	17	c("URAD", "IMPDH2", "GUK1", "AK2", "GDA", "PAPSS2")
112	KEGG_FOCAL_ADHESION	0.59625	0.835319	0.04783	-0.33049	-0.933372	29	c("COL6A1", "ITGB1", "GRB2", "COL6A2", "RAP1B", "TNXB", "PPP1CB", "VASP")
113	KEGG_PORPHYRIN_AND_CHLOROPHYLL_METABOLISM	0.543605	0.818643	0.0590955	-0.460093	-0.962969	8	c("HMOX1", "FTH1", "BLVRB")
114	KEGG_B_CELL_RECEPTOR_SIGNALING_PATHWAY	0.546032	0.818643	0.063079	-0.528293	-0.965714	5	c("GRB2", "PPP3R1", "CHP1")
115	KEGG_ASTHMA	0.547406	0.818643	0.0687943	-0.664971	-0.973952	2	c("FCER1A", "FCER1G")
116	KEGG_REGULATION_OF_ACTIN_CYTOSKELETON	0.504162	0.789536	0.0532386	-0.340905	-0.999188	37	c("GNG12", "ARPC5", "ITGB1", "ARPC3", "ARPC4", "CFL1", "BRK1", "PPP1CB", "BAIAP2", "ARPC2", "ITGB6")
117	KEGG_DILATED_CARDIOMYOPATHY	0.430615	0.700805	0.0696133	-0.453873	-1.03159	11	c("ITGB1", "LMNA", "DES", "DAG1", "ATP2A2", "ITGB6")
118	KEGG_HYPERTROPHIC_CARDIOMYOPATHY_HCM	0.430615	0.700805	0.0696133	-0.453873	-1.03159	11	c("ITGB1", "LMNA", "DES", "DAG1", "ATP2A2", "ITGB6")
119	KEGG_PATHWAYS_IN_CANCER	0.398936	0.675985	0.0697793	-0.415802	-1.05501	17	c("ITGB1", "GRB2", "ELOB")
120	KEGG_GNRH_SIGNALING_PATHWAY	0.43514	0.701293	0.0760837	-0.61338	-1.05752	4	GRB2
121	KEGG_FOLATE_BIOSYNTHESIS	0.399076	0.675985	0.0772747	-0.555457	-1.06273	6	c("GCH1", "ALPL")
122	KEGG_ARRHYTHMOGENIC_RIGHT_VENTRICULAR_CARDIOMYOPATHY_ARVC	0.411111	0.689338	0.0704501	-0.445524	-1.06511	13	c("ITGB1", "LMNA", "DES", "DAG1", "ATP2A2", "ITGB6")
123	KEGG_PROSTATE_CANCER	0.392063	0.675985	0.0797706	-0.588691	-1.07612	5	GRB2
124	KEGG_VIBRIO_CHOLERAE_INFECTION	0.382979	0.669205	0.0751182	-0.462703	-1.08048	12	c("ARF1", "ATP6V1G1", "ATP6V1F", "ATP6V1E1", "TJP1", "ATP6V1A", "ATP6V1B2", "SEC61B", "TJP2")
125	KEGG_ENDOCYTOSIS	0.379442	0.669205	0.0699459	-0.403681	-1.08098	22	c("ARFGAP2", "CLTB", "EHD3", "DAB2", "AP2A1", "CHMP2B", "CHMP6", "ARF6", "HSPA8", "RAB5C")
126	KEGG_GLYCEROPHOSPHOLIPID_METABOLISM	0.380952	0.669205	0.0831291	-0.635648	-1.09591	4	LYPLA1
127	KEGG_T_CELL_RECEPTOR_SIGNALING_PATHWAY	0.35131	0.64184	0.0840746	-0.573713	-1.09766	6	c("GRB2", "PPP3R1", "CHP1")
128	KEGG_AMINO_SUGAR_AND_NUCLEOTIDE_SUGAR_METABOLISM	0.351585	0.64184	0.08042	-0.497525	-1.1022	10	CMAS
129	KEGG_RIBOSOME	0.306452	0.633982	0.0723571	-0.348202	-1.10669	67	c("RPL9", "RPS10", "RPL6", "RPS20", "RPS6", "RPL12", "RPL35", "RPL38", "RPS19", "RPL7A", "RPLP2", "RPL23", "RPL15", "RPS18", "RPL10A", "RPS5", "RPS3", "RPS25", "RPL11", "RPL26", "UBA52", "RPL27", "RPL30", "RPS26", "RPS21", "RPL17", "RPLP1", "RPL5", "RPS13", "RPS8", "RPS27", "RPS3A", "RPL19")
130	KEGG_EPITHELIAL_CELL_SIGNALING_IN_HELICOBACTER_PYLORI_INFECTION	0.351852	0.64184	0.0797706	-0.513963	-1.10873	9	c("F11R", "ATP6V1G1", "ATP6V1F", "ATP6V1E1", "TJP1", "ATP6V1A", "ATP6V1B2")
131	KEGG_ACUTE_MYELOID_LEUKEMIA	0.341682	0.64184	0.0940503	-0.760529	-1.11391	2	GRB2
132	KEGG_DORSO_VENTRAL_AXIS_FORMATION	0.341682	0.64184	0.0940503	-0.760529	-1.11391	2	GRB2
133	KEGG_ENDOMETRIAL_CANCER	0.341682	0.64184	0.0940503	-0.760529	-1.11391	2	GRB2
134	KEGG_MTOR_SIGNALING_PATHWAY	0.341682	0.64184	0.0940503	-0.762355	-1.11659	2	c("RPS6", "EIF4B")
135	KEGG_PARKINSONS_DISEASE	0.273649	0.622613	0.0806388	-0.369528	-1.126	51	c("NDUFS4", "NDUFS8", "NDUFB3", "NDUFS6", "NDUFA2", "NDUFC2", "NDUFB4", "NDUFB7", "NDUFB8", "ATP5PD", "NDUFB10", "UBE2L3", "PARK7", "NDUFS3", "ATP5F1D", "NDUFS5", "NDUFB6", "VDAC1", "NDUFB1")
136	KEGG_RENAL_CELL_CARCINOMA	0.315407	0.638507	0.086795	-0.544718	-1.14009	8	c("GRB2", "RAP1B", "ELOB")
137	KEGG_ARACHIDONIC_ACID_METABOLISM	0.290598	0.622613	0.100991	-0.722171	-1.14101	3	c("GPX1", "GGT1")
138	KEGG_APOPTOSIS	0.307061	0.633982	0.095288	-0.667248	-1.15039	4	c("AIFM1", "PPP3R1", "CHP1")
139	KEGG_LEUKOCYTE_TRANSENDOTHELIAL_MIGRATION	0.292553	0.622613	0.0860347	-0.453516	-1.1507	17	c("F11R", "ITGB1", "PECAM1", "RAP1B")
140	KEGG_OXIDATIVE_PHOSPHORYLATION	0.215333	0.595753	0.0940503	-0.386083	-1.17174	49	c("NDUFS4", "NDUFS8", "NDUFB3", "NDUFS6", "NDUFA2", "NDUFC2", "NDUFB4", "NDUFB7", "NDUFB8", "ATP5PD", "PPA2", "NDUFB10", "ATP6V1G1", "ATP6V1F", "NDUFS3", "ATP5F1D", "ATP6V1E1", "NDUFS5", "NDUFB6", "NDUFB1", "PPA1", "ATP6V1A", "NDUFV3", "ATP6V1B2", "NDUFAB1")
141	KEGG_NEUROTROPHIN_SIGNALING_PATHWAY	0.275168	0.622613	0.0899861	-0.475411	-1.17175	15	c("GRB2", "YWHAB", "YWHAE", "RAP1B", "ARHGDIA", "YWHAZ", "YWHAG", "YWHAH", "CDC42", "YWHAQ")
142	KEGG_AMYOTROPHIC_LATERAL_SCLEROSIS_ALS	0.258982	0.622613	0.0999277	-0.592652	-1.18942	7	c("GPX1", "CAT", "PPP3R1", "CHP1")
143	KEGG_GLIOMA	0.237607	0.606811	0.113787	-0.754108	-1.19147	3	GRB2
144	KEGG_FC_GAMMA_R_MEDIATED_PHAGOCYTOSIS	0.25067	0.617391	0.095288	-0.480325	-1.194	16	c("ARPC5", "MARCKS", "ARPC3", "ARPC4", "CFL1", "VASP", "ARF6", "ARPC2", "WASF2", "CFL2", "GSN", "CDC42")
145	KEGG_CELL_CYCLE	0.252907	0.617391	0.0995791	-0.572263	-1.19774	8	c("YWHAB", "YWHAE", "YWHAZ", "YWHAG", "SFN", "YWHAH", "SKP1", "YWHAQ")
146	KEGG_CHRONIC_MYELOID_LEUKEMIA	0.230769	0.598558	0.115734	-0.758261	-1.19803	3	GRB2
147	KEGG_ERBB_SIGNALING_PATHWAY	0.230769	0.598558	0.115734	-0.758261	-1.19803	3	GRB2
148	KEGG_PROTEIN_EXPORT	0.246439	0.617391	0.0999277	-0.556897	-1.20135	9	SRP9
149	KEGG_JAK_STAT_SIGNALING_PATHWAY	0.190184	0.595753	0.142901	-0.901961	-1.21098	1	GRB2
150	KEGG_PATHOGENIC_ESCHERICHIA_COLI_INFECTION	0.21232	0.595753	0.103958	-0.469023	-1.21443	19	c("ARPC5", "ITGB1", "ARPC3", "ARPC4", "NCL", "CTTN", "ARPC2", "YWHAZ")
151	KEGG_ECM_RECEPTOR_INTERACTION	0.223861	0.598558	0.10208	-0.493822	-1.22755	16	c("CD47", "COL6A1", "ITGB1", "COL6A2", "TNXB", "DAG1", "CD44", "ITGB6")
152	KEGG_LEISHMANIA_INFECTION	0.157464	0.56824	0.158514	-0.916485	-1.23048	1	ITGB1
153	KEGG_UBIQUITIN_MEDIATED_PROTEOLYSIS	0.212251	0.595753	0.10925	-0.57042	-1.23052	9	c("UBE2N", "SAE1", "ELOB", "UBE2L3", "UBE2H")
154	KEGG_CHEMOKINE_SIGNALING_PATHWAY	0.212251	0.595753	0.10925	-0.571168	-1.23214	9	c("GNG12", "GRB2", "RAP1B")
155	KEGG_HUNTINGTONS_DISEASE	0.139845	0.561979	0.120433	-0.39685	-1.23239	58	c("NDUFS4", "NDUFS8", "GPX1", "NDUFB3", "CLTB", "NDUFS6", "NDUFA2", "NDUFC2", "TFAM", "NDUFB4", "NDUFB7", "NDUFB8", "ATP5PD")
156	KEGG_NUCLEOTIDE_EXCISION_REPAIR	0.150268	0.561979	0.151149	-0.847124	-1.24074	2	RAD23B
157	KEGG_ALZHEIMERS_DISEASE	0.126126	0.556798	0.128789	-0.408666	-1.24525	51	c("NDUFS4", "NDUFS8", "NDUFB3", "NDUFS6", "NDUFA2", "NDUFC2", "NDUFB4", "NDUFB7", "NDUFB8", "ATP5PD", "NDUFB10", "PPP3R1", "APOE", "NDUFS3", "ATP5F1D", "CHP1", "NDUFS5", "NDUFB6", "ATP2A2", "APP", "NDUFB1")
158	KEGG_DRUG_METABOLISM_OTHER_ENZYMES	0.20317	0.595753	0.112843	-0.562454	-1.24604	10	c("CES1", "IMPDH2")
159	KEGG_INTESTINAL_IMMUNE_NETWORK_FOR_IGA_PRODUCTION	0.0777096	0.47777	0.231127	-0.951344	-1.27728	1	PIGR
160	KEGG_VASCULAR_SMOOTH_MUSCLE_CONTRACTION	0.162393	0.573559	0.127505	-0.593172	-1.2796	9	c("MYL6", "PPP1CB", "CALD1", "PPP1R14A")
161	KEGG_REGULATION_OF_AUTOPHAGY	0.0501154	0.39615	0.321776	-0.976035	-1.31043	1	GABARAPL1
162	KEGG_SNARE_INTERACTIONS_IN_VESICULAR_TRANSPORT	0.121257	0.556798	0.154191	-0.658985	-1.32255	7	c("VAMP8", "VAMP3")
163	KEGG_LONG_TERM_POTENTIATION	0.130814	0.556798	0.145516	-0.63787	-1.33505	8	c("RAP1B", "PPP3R1", "PPP1CB", "CHP1")
164	KEGG_BASE_EXCISION_REPAIR	0.00959481	0.132728	0.38073	-0.877001	-1.51202	4	c("PARP3", "HMGB1", "APEX1", "PARP1")
165	KEGG_SPLICEOSOME	0.00132087	0.0438529	0.45506	-0.586224	-1.7299	39	c("SF3B2", "SF3B1", "HNRNPU", "SRSF1", "U2AF2", "DDX39B", "HNRNPC", "SNRNP70", "RBMX", "SNRPG", "PCBP1", "RBM8A", "SRSF9", "HNRNPK", "SF3A1", "SNRPD2", "SRSF3", "ALYREF", "SF3B4")
166	KEGG_CELL_ADHESION_MOLECULES_CAMS	0.00164055	0.0453886	0.45506	-0.804721	-1.73596	9	c("ALCAM", "F11R", "ITGB1", "PECAM1")

## Sheet: Raw Data
Protein IDs	LFQ intensity 0_07_G_J1	LFQ intensity 0_07_G_J2	LFQ intensity 0_07_G_J3	LFQ intensity 0_07_G_J4	LFQ intensity 0_07_G_J5	LFQ intensity 0_11_G_J1	LFQ intensity 0_11_G_J2	LFQ intensity 0_11_G_J3	LFQ intensity 0_11_G_J4	LFQ intensity 1_02_G_J1	LFQ intensity 1_02_G_J2	LFQ intensity 1_02_G_J3	LFQ intensity 1_02_G_J4	LFQ intensity 1_02_G_J5	LFQ intensity 1_04_G_A1	LFQ intensity 1_04_G_A2	LFQ intensity 1_04_G_A3	LFQ intensity 1_04_G_A4	LFQ intensity 1_04_G_A5	LFQ intensity 1_06_G_A1	LFQ intensity 1_06_G_A2	LFQ intensity 1_06_G_A3	LFQ intensity 1_06_G_A4	LFQ intensity 1_06_G_A5
NP_001267607.1	25.1744	25.1684	26.1031	25.0552	25.344	25.8935	25.5207	24.7757	25.9503	25.8837	24.6252	25.0231	24.4543	24.4631	25.0598	25.0507	23.176	23.9363	24.0353	25.3022	25.2589	23.7004	24.6213	24.5006
XP_004600167.1	20.0051	19.0271	21.6725	21.7078	20.016	20.2249	21.7406	20.6725	19.0386	21.2934	21.8817	22.1802	22.5312	19.3151	20.9111	19.8845	18.8513	19.6554	21.8423	18.6752	21.287	21.495	22.1653	21.6576
XP_004600176.2;XP_055002336.1;XP_055002353.1;XP_055002348.1	20.4581	20.5847	18.8289	21.3721	20.4898	19.9728	20.8207	20.3018	20.1766	19.5866	21.5198	21.2096	20.0969	19.457	20.3886	20.2231	20.3328	19.5531	19.7939	19.6723	20.5962	21.3777	22.016	19.4666
XP_004600193.1	23.7929	23.206	23.6375	23.8659	23.5966	23.751	23.4044	24.1759	24.3926	24.4282	24.2731	23.5188	23.5439	23.651	23.9607	23.8087	22.8947	22.7389	23.7596	24.2137	23.6251	24.573	24.4631	23.882
XP_004600231.1;XP_054977911.1	25.075	24.6986	25.9769	25.7164	25.5466	24.0539	25.0961	25.6777	25.5174	25.0818	25.75	25.9844	26.1181	25.2337	25.7303	24.6443	24.6949	24.5779	25.1743	23.3864	24.6524	24.8122	26.1025	25.378
XP_004600246.1	25.0528	25.0213	24.4383	23.8461	23.313	25.5018	25.1591	25.6089	24.77	24.4655	25.3166	24.8276	24.8364	24.8036	24.5512	24.1969	24.5949	24.8579	24.8966	24.1991	24.6708	24.3618	24.6073	24.7298
XP_004600271.1;XP_055001822.1	23.8194	22.1776	24.3661	24.5797	24.2386	23.2144	23.4658	23.8077	23.5991	23.0756	24.1529	23.941	24.2292	22.9173	24.3286	23.8035	25.3662	23.5781	24.1317	23.6346	24.477	24.18	24.739	24.6819
XP_004600273.1	20.9035	19.2908	20.991	21.9493	19.7501	21.2283	21.1142	21.0297	21.0083	19.0582	21.0403	21.0926	20.2649	21.6171	18.5742	19.4075	20.6333	19.8929	20.6096	17.8689	19.5914	20.589	21.2698	21.3335
XP_004600278.1;XP_004600281.1	23.5409	21.0179	23.0806	22.8691	21.9446	22.0187	21.9442	21.1494	21.2413	22.9316	19.4098	21.7328	21.441	20.7099	23.7497	22.6794	18.9154	23.0164	22.2203	23.0606	25.0176	22.9747	22.0281	23.0981
XP_004600282.1;XP_054989582.1	22.7754	21.5822	23.0653	23.2316	23.9389	21.6878	22.436	22.7873	21.7298	20.2265	22.2161	22.7972	23.0625	22.2195	22.5905	22.3386	23.8684	20.8858	23.1863	22.2805	24.2156	23.1721	22.6775	23.7932
XP_004600287.2	26.4163	25.0399	25.6231	25.8616	25.3282	25.8573	26.3371	26.506	26.4802	26.3781	26.4593	26.2014	26.559	26.198	25.4556	25.3981	25.4301	26.2841	25.6437	25.2828	25.574	25.5722	24.8524	25.0795
XP_004600295.1;XP_004600294.1;XP_004600293.1;XP_004600292.1	25.2032	24.5127	25.1945	24.9097	24.7256	24.7223	25.0187	24.9417	25.1585	24.5466	24.9022	23.9627	24.8339	24.4151	24.4904	24.5416	23.6384	24.4972	24.2886	24.9743	24.3065	24.5161	25.0233	24.0867
XP_004600303.1	23.9191	23.1529	24.6481	24.9416	24.4145	24.0474	23.1254	24.2842	23.9923	24.1053	25.0356	25.277	24.557	24.3981	24.5669	24.6481	25.3256	24.2009	25.0396	25.3039	24.8899	25.2413	24.3314	24.8601
XP_004600311.1	20.5157	20.8783	21.2128	20.2099	19.3959	19.0054	21.7772	21.0255	22.6596	21.4015	20.6906	22.3642	20.1	19.8411	20.0749	20.7075	22.3461	19.4806	20.6574	21.0293	22.062	20.5778	21.4376	21.4271
XP_004600326.2;XP_054995198.1	20.9065	22.0442	23.3717	22.7135	23.1101	20.8329	17.9983	21.5888	21.3824	21.6736	21.8251	19.5343	21.3567	21.1613	21.777	22.2684	23.2711	21.7225	23.0591	24.0083	23.7612	23.0901	22.8277	23.7986
XP_054998835.1;XP_004600328.1;XP_054992409.1;XP_054983816.1	26.3705	25.9882	27.2281	27.596	27.206	26.1942	26.2671	26.674	26.1282	26.2052	26.9284	27.4283	26.8955	27.2069	26.5316	27.0385	27.6341	27.1413	27.7771	26.9208	27.5808	27.3566	27.1825	27.5447
XP_004600333.2	22.6712	22.8696	23.5954	23.2905	22.0993	22.9654	22.3908	22.3695	22.3273	22.253	23.3928	23.3566	23.29	23.1399	24.2895	23.8924	22.6016	23.0492	23.2888	23.6498	23.6327	22.8501	23.217	23.375
XP_004600342.1	24.4086	24.0474	24.6738	24.2107	24.0639	24.1116	24.3483	24.4972	24.8296	24.1592	24.5901	23.8484	24.222	23.8845	24.1196	23.6392	23.4914	23.8901	23.6529	23.778	23.6794	23.7155	24.3019	23.8252
XP_004600349.1;XP_054978576.1;XP_054985185.1	26.7689	26.579	26.3233	25.6474	25.8811	26.9085	27.3295	27.1673	26.3925	25.9718	26.3687	26.4326	26.7624	26.2728	26.4113	26.0737	25.4401	26.2326	26.1451	26.1716	26.6092	25.7672	25.6469	26.2327
XP_004600490.2	23.6961	23.6388	24.0006	23.5624	23.23	23.134	23.4706	24.0397	23.7181	23.236	24.3872	23.4825	23.504	23.1707	22.7959	23.0698	23.6752	22.8816	24.1473	22.6636	22.5821	22.4877	23.5301	22.9939
XP_004600540.1	22.4208	21.528	22.2274	21.8438	21.8242	22.3891	22.0405	22.1411	22.2075	21.8342	22.2423	21.4851	21.4006	21.6735	18.9376	19.7734	20.1041	21.297	21.4403	21.1784	21.2302	21.2227	21.6511	21.1176
XP_004600544.1;XP_055001780.1	23.8095	23.2247	23.3257	23.3467	23.2297	23.9126	24.1843	24.4489	24.1806	23.7886	23.196	23.1494	23.0519	23.5889	23.4495	24.0102	24.0434	23.4437	23.6738	23.3152	24.009	23.185	22.7656	24.6072
XP_004600557.1	22.6996	21.485	22.5453	21.8405	22.3467	21.8836	22.1396	22.4117	22.0467	21.3611	21.465	20.406	21.6424	21.2409	21.5739	19.4924	21.3955	21.469	21.4656	21.7178	21.9147	21.2489	21.4034	19.7141
XP_004600582.1	20.0122	19.5405	23.9942	19.3489	21.1676	19.814	21.1685	21.6593	23.406	19.6249	24.129	20.1016	19.859	19.5472	21.8086	21.5556	19.3811	19.7161	20.3693	19.1982	20.4795	19.908	20.2291	21.1063
XP_004600610.2;XP_055001077.1;XP_004600608.2	20.6596	19.9971	21.71	20.8374	21.0646	20.2341	21.259	20.2342	22.2336	20.9019	22.1074	20.8062	20.6561	20.9131	20.5707	20.756	20.3002	20.6176	21.2453	20.216	20.4399	20.5259	21.7097	20.7428
XP_004600619.2	25.0329	23.6136	25.2992	27.6521	24.8335	24.6203	25.1375	25.4973	24.1924	23.8085	25.4908	25.5546	25.6705	24.7293	25.498	24.8629	25.1777	24.8998	24.9961	24.119	24.9442	25.7021	25.2213	25.318
XP_004600685.1	24.5037	24.2891	25.8511	27.0779	26.8945	24.1545	24.1126	24.4761	24.1056	24.6597	25.3832	26.1912	25.1365	25.2138	25.4811	25.6309	27.2352	25.5804	26.7821	25.0074	26.1549	26.9801	25.5486	26.9611
XP_004600748.2	23.1591	21.2327	23.1367	24.0036	23.9982	22.1236	22.5479	23.3475	22.6238	23.4486	24.5082	24.449	24.0609	23.7496	23.0122	23.3807	25.7392	23.4028	25.2006	23.598	23.5183	24.7536	23.9235	25.0699
XP_004600751.2	23.8502	24.268	25.1271	25.3059	24.4496	23.9014	24.1615	24.3583	24.2218	24.837	24.4978	24.6553	24.0845	23.7852	23.9958	24.2051	25.5522	23.6672	25.5217	24.2661	24.2121	25.0651	24.0693	24.9198
XP_004600769.1	23.6753	21.2717	23.3636	24.2223	23.0721	22.8325	23.0828	23.3628	23.899	23.8651	24.5829	24.3626	24.3698	23.7581	24.4318	23.8664	24.7871	23.1755	24.6655	23.2048	24.0757	24.1227	24.0398	24.6057
XP_004600792.1;XP_054990972.1	27.0337	27.5896	26.4647	25.8671	26.6436	27.4718	27.5497	27.9179	27.5579	27.9249	28.0322	27.267	26.85	27.0407	26.9056	25.8477	26.5751	26.7665	26.8812	25.9544	25.4546	25.6537	26.8196	26.5622
XP_004600814.2	20.8883	20.5721	17.9255	21.3397	20.8452	19.7076	21.291	21.0178	19.5726	20.9686	21.1074	20.638	20.4405	18.4214	20.6163	20.6591	20.6354	20.7524	19.409	18.781	20.9077	19.5706	21.7755	19.9046
XP_054998438.1;XP_004604126.1;XP_004600818.1;XP_004605631.2;XP_054984518.1;XP_054977929.1;CON__P62894	26.532	25.8971	25.8952	25.9495	25.2315	25.9563	25.731	26.1203	26.215	25.8911	26.5442	26.1507	25.7138	25.5579	25.6328	25.1521	27.2375	26.3035	26.2849	26.0252	25.3288	25.6273	25.4657	25.815
XP_004600847.1;XP_055002357.1	23.9749	22.9722	23.2936	22.8984	22.9648	23.079	23.0175	23.4668	22.3211	23.8269	23.3148	23.55	23.9331	23.0128	22.3964	22.0567	23.1219	23.9846	23.5996	23.8502	22.4878	23.3468	23.8267	22.6116
XP_004600944.1	23.1393	19.2146	25.5783	23.5644	25.1718	22.525	22.4309	23.4779	23.14	23.3863	21.4097	21.9698	23.2367	22.3312	23.8731	25.9616	24.0565	24.7742	23.7199	24.7209	24.3658	24.2535	24.6212	25.1826
XP_055001821.1;XP_004600978.1	21.9928	21.3628	22.638	22.2664	22.3741	21.786	21.4518	22.5219	22.4117	22.0739	23.1146	23.067	22.8922	22.4086	22.3765	22.443	22.5904	21.8502	23.3095	22.1636	22.0715	22.2612	22.2863	22.9747
XP_004601084.1	26.8301	28.2517	26.9836	26.7042	26.007	27.3103	27.1491	27.7474	27.4066	26.9324	28.7622	26.9575	26.2274	26.3786	26.6338	26.129	26.1997	26.6933	27.8091	26.2809	25.6217	26.5262	27.0405	26.5056
XP_004601105.1	19.1861	18.4079	22.0429	21.3816	19.6767	19.7409	20.4422	19.9638	21.5647	19.7911	20.1129	20.7288	22.6817	19.8908	21.3166	20.5039	18.172	19.3899	19.9546	20.1069	19.5715	19.4345	20.4381	18.4745
XP_004601125.1	20.1831	19.6681	19.8373	18.8327	18.3182	19.0797	18.5406	19.1089	19.3837	19.6677	19.663	18.9701	19.8471	18.8007	20.4466	21.9388	20.0002	20.2721	20.7191	22.493	22.0056	21.7967	19.9067	18.2868
XP_004601199.2	21.7021	19.4832	21.8452	20.7517	20.3672	20.8928	21.6256	21.6869	21.8146	20.598	20.3217	21.8643	20.8234	19.4085	20.395	19.4445	19.4527	20.4421	20.0497	19.4675	20.2931	20.4733	20.4424	20.7448
XP_054979003.1;XP_004601222.1;XP_054979002.1	18.777	18.3105	20.4818	18.995	19.9498	20.7938	19.5074	21.0293	19.1226	19.2302	19.4246	20.3137	20.874	19.0763	19.968	20.5759	20.2969	18.5088	20.8854	18.5378	21.7863	21.0651	19.9647	20.9487
XP_004601297.1;XP_054976477.1	21.6579	20.0425	19.8604	20.6219	21.1152	20.4046	21.7782	21.154	22.3802	21.4943	22.0667	20.879	21.4837	20.3275	18.5098	19.3536	20.4305	19.8235	19.4346	19.7996	19.2184	21.3983	19.0436	20.8067
XP_054994772.1;XP_054976478.1;XP_004601302.1;XP_004601301.1;XP_054983703.1;XP_054980758.1	28.3516	27.1474	28.1244	28.8261	27.8676	27.1608	27.3383	27.9925	27.6032	26.5049	27.5761	27.7879	27.7638	27.1524	27.2151	27.2651	27.7119	27.5373	27.8278	27.9688	28.1515	28.4942	28.2409	28.584
XP_004601327.1	23.9533	23.5757	23.6772	23.8398	22.5322	23.9912	23.5811	24.1896	24.1399	23.9862	24.1927	23.9747	23.641	23.5642	23.3189	23.0454	23.3784	23.5901	23.666	22.9848	23.1756	23.4699	23.3473	23.6995
XP_004601359.2	22.38	18.838	24.0795	24.8953	24.3497	19.2214	19.7101	22.7229	21.9504	23.386	24.3485	24.6074	23.7596	23.178	23.9019	24.3283	26.1325	23.9586	24.9971	24.688	24.3352	24.6938	24.4348	24.8071
XP_004601371.1	23.1079	22.3605	21.9891	23.4509	23.1436	21.9916	22.8336	22.5189	22.2961	21.0364	22.9551	22.5688	22.4473	22.5718	22.4203	22.6024	22.4744	22.0427	22.2347	21.9807	22.8709	23.129	22.6496	22.1723
XP_004601385.2;XP_054976745.1;XP_054976744.1	29.2854	28.4118	30.6783	32.0851	31.6941	29.0628	28.665	29.1088	28.6682	29.267	30.453	31.2473	30.1159	30.1016	30.0371	30.6983	32.5403	30.4893	31.9832	29.9683	31.0965	32.0251	30.4224	31.911
XP_004601453.2	26.4251	18.8981	19.8734	26.0525	19.8557	18.5226	27.5534	26.7941	27.1244	18.4268	25.9669	25.9507	18.2355	25.967	25.6012	20.1712	26.5707	25.8439	18.3541	24.5442	26.6259	25.6893	20.2895	26.1797
XP_054976933.1;XP_054976934.1;XP_054976932.1;XP_054976931.1;XP_054976929.1;XP_054976928.1;XP_054976927.1;XP_054976926.1;XP_004601490.2	23.8235	23.2179	22.9998	22.8017	23.6438	23.3597	23.2494	23.7159	22.9642	23.3782	22.9341	23.6813	23.9765	23.5037	23.8386	23.5479	23.2041	23.2432	22.9045	23.9165	24.32	22.7503	23.3621	23.6955
XP_004601491.2;XP_054978553.1	20.4763	20.5665	19.4747	19.121	19.1376	19.6796	20.9985	21.3772	20.7137	21.6946	21.4771	21.7339	21.4594	21.6513	21.88	23.0525	22.8996	23.0614	24.6668	21.3702	21.0969	22.5398	22.4437	22.4123
XP_004601513.1	19.7326	18.8084	19.6604	22.3337	19.1371	20.0743	21.0551	20.4926	21.4866	20.8992	20.2347	22.2254	22.6386	21.0637	20.0958	20.6334	24.0802	19.3678	23.0918	18.2728	23.5883	21.7963	21.4697	21.8887
XP_004601566.1;CON__P05787;CON__H-INV:HIT000292931;CON__Q9H552;CON__H-INV:HIT000016045;CON__Q9DCV7;CON__Q3KNV1;CON__P08729;CON__Q9NSB2;CON__Q6ISB0	25.6385	26.4643	27.4413	28.9653	27.7816	25.8875	26.1875	27.8223	27.0644	26.2631	28.1969	27.3033	27.1473	27.2289	28.776	27.7733	30.3487	27.0742	27.2564	26.1538	29.1989	28.7296	27.7944	28.6051
XP_004601577.1	22.1142	22.234	22.367	21.6156	21.2552	21.5751	22.2952	21.839	22.2228	22.4402	21.893	21.9857	21.3868	18.9297	21.9345	21.0083	21.0387	19.5525	21.3905	19.185	19.7231	18.6583	21.3977	22.0309
XP_004601592.1;XP_004601590.1;XP_054980007.1;XP_004601586.1;XP_004601585.1;XP_054984019.1;XP_054984008.1;XP_054983999.1;XP_054984000.1;XP_054984001.1;XP_054984003.1;XP_054984002.1;XP_054984004.1;XP_054984005.1;XP_054984006.1;XP_054984007.1;XP_054984010.1;XP_054984009.1;XP_054984011.1;XP_054984018.1;XP_054984012.1;XP_054984013.1;XP_054984014.1;XP_054984015.1;XP_054984016.1;XP_054984017.1;XP_054983…	21.856	21.6135	22.3834	21.74	21.8906	20.9868	22.2298	23.6455	21.9108	21.1239	22.5253	22.6597	23.1341	22.5595	21.9409	22.1195	24.8696	21.9066	22.2404	21.9774	23.1645	21.779	22.5776	22.7082
XP_004601617.1;XP_004601618.1;XP_012789850.2	23.2332	21.8835	21.9958	20.044	17.8791	22.174	22.5385	22.7896	22.7433	21.8727	22.1924	22.3615	21.1025	18.8336	21.7197	21.6504	21.4738	19.8561	19.7785	21.1607	21.649	19.7292	19.4133	18.8985
XP_004601642.1	23.3363	22.1116	23.2486	22.4136	22.6405	22.4304	22.5467	22.67	22.9548	22.8704	22.5184	22.0885	22.4773	22.4518	22.0578	22.1807	21.2643	21.9948	21.9165	22.2693	22.1761	22.176	21.7415	21.7604
XP_054982393.1;XP_054982392.1;XP_004601668.1	24.666	23.1139	24.3671	23.6031	23.3366	24.0901	23.3144	23.2401	23.5078	23.4002	23.5329	23.3404	23.5743	22.5132	23.1301	23.5812	22.6537	22.8391	23.2902	23.5417	23.6231	23.3507	23.5857	23.6506
XP_054983077.1;XP_004601671.1	18.6234	19.9744	22.1263	24.1229	23.1024	19.817	18.8588	19.9841	19.6854	20.255	21.5713	22.0849	21.7357	20.3844	19.3385	21.1952	24.6547	20.6986	23.2797	20.6156	22.7403	23.4857	21.8456	21.9952
XP_004601674.1	28.4433	27.9999	29.2231	28.9428	29.1119	28.389	28.4788	29.176	28.6636	28.5286	29.0087	29.0617	28.7526	28.7574	29.0388	29.0947	29.7554	28.6067	29.1307	29.4582	29.3451	29.1426	29.1852	29.4365
XP_054984607.1;XP_004601675.1	26.4146	25.574	26.6583	24.9679	25.6362	26.3485	26.1577	25.6671	26.0059	25.9723	26.5456	25.6059	26.0739	25.594	25.8554	25.7886	24.6901	25.5876	25.8295	25.4996	25.5554	25.1937	25.7973	26.1336
XP_004601681.2	21.2861	20.4248	23.3537	23.9493	23.1097	21.1568	21.7182	22.3937	22.4144	20.9326	22.5266	22.9684	22.4802	20.022	21.5775	22.0017	23.0906	22.285	22.5961	21.6646	21.6739	22.741	21.9187	23.1869
XP_004601688.1	24.0341	23.2519	23.6838	24.0685	24.0147	23.164	23.2921	23.338	21.4419	22.6937	24.3795	24.9842	24.7046	24.3231	23.8286	23.7774	25.2369	23.8867	24.9167	22.4748	24.0934	24.3256	22.7627	24.4321
XP_004601699.1	22.7982	22.562	22.7709	22.5863	22.4062	22.3651	23.4793	23.5261	23.5871	21.4423	22.9766	21.9537	22.8395	22.5554	22.9209	22.2197	21.5415	22.3122	21.8965	22.0365	22.4233	21.8831	22.4964	22.5908
XP_004601758.2;XP_054983399.1;XP_054983400.1	23.2558	22.4606	24.546	23.5091	23.3828	21.5587	22.0952	22.1162	22.469	22.396	24.0094	23.6205	24.0233	22.9158	24.4958	23.2673	23.2835	22.7543	23.417	23.57	23.5971	23.6703	24.5943	24.3979
XP_054987346.1;XP_054987345.1;XP_004601789.2;XP_004618443.1;XP_054986025.1;XP_004601852.2	22.574	22.3851	24.1594	24.2685	24.6867	22.4239	22.7345	23.62	23.7003	23.3354	23.8383	23.6548	23.558	23.1144	24.0063	24.6897	26.2089	24.4018	25.652	24.8549	24.9773	25.3063	25.5665	24.8734
XP_004601796.1	24.4593	25.2257	25.0805	24.2797	22.6313	23.9674	24.6642	24.4206	24.4303	23.5051	24.2731	24.5493	24.9476	24.4747	24.1073	23.2109	23.1733	21.682	23.5398	24.7277	24.1555	23.6873	24.7446	23.9055
XP_004601800.1	20.9708	20.8614	21.1605	20.3701	20.004	20.5585	20.4145	20.7013	20.1952	19.5437	20.4412	20.9721	21.6776	20.3896	21.0872	21.9399	19.8521	19.1578	20.5274	19.8413	21.3115	20.3471	20.3039	21.7028
XP_004601811.2;XP_004617427.1;XP_055001981.1	21.3392	21.0082	21.6633	22.2503	21.5676	21.2624	21.6352	21.8954	21.9205	21.7238	21.1311	20.8279	21.7304	21.9054	21.1507	20.7499	21.2579	21.7802	21.1924	21.7707	21.061	21.5289	22.1869	20.8294
XP_012790206.1;XP_004601837.1;XP_054987190.1;XP_054987189.1;XP_054987188.1;XP_054987192.1;XP_054987191.1	22.9865	20.7619	21.7104	22.0992	21.1091	21.2131	22.7473	21.8141	21.7945	20.1307	21.7743	21.593	21.7852	21.621	21.5731	21.2296	20.8864	19.0896	21.2915	21.3368	21.6344	21.5082	21.8294	21.6702
XP_054989376.1;XP_054989375.1;XP_054989374.1;XP_054989373.1;XP_054989372.1;XP_054989371.1;XP_004601839.1	25.1819	23.9435	24.406	23.4774	23.6798	24.4605	24.184	24.9572	23.9801	24.8489	23.9396	24.0509	23.7121	23.9275	24.6725	22.454	22.9148	23.0258	22.81	23.5747	23.2382	23.1602	24.3083	23.3452
XP_054982465.1;XP_004601983.2	24.4159	23.3719	24.8061	24.6835	23.7834	23.966	24.6074	24.4026	24.4401	24.3173	24.6816	24.9798	25.1738	24.5354	25.2179	25.0956	25.215	25.183	25.4856	25.896	25.334	25.6591	26.0637	25.4341
XP_004601984.2;XP_004609434.2	22.7735	22.6779	23.8735	23.7086	23.4473	22.7405	22.9064	23.3214	23.2548	22.8785	23.4783	23.1795	23.5886	23.7979	23.4273	22.4474	23.2562	23.1321	23.2368	22.3251	22.522	23.3772	23.9167	23.1564
XP_004602010.2	19.1085	21.2874	22.9462	22.0477	22.3734	22.6709	23.1604	23.7704	22.813	22.4208	24.0976	22.1138	23.0705	22.4585	22.9849	22.4516	20.0903	20.7263	20.3576	19.6884	21.6595	21.9333	23.4259	22.4341
XP_004602080.1	23.6114	23.4342	23.8356	22.8377	22.9442	24.0061	23.8802	23.9569	24.3157	24.361	24.5377	24.1874	23.5032	24.5345	23.4707	22.4252	23.235	23.1504	22.6701	22.1501	21.1523	19.8463	23.0744	22.67
XP_054978253.1;XP_004606418.1;XP_004602105.1	27.2545	26.7902	27.5734	27.0392	26.1283	27.1081	27.3956	27.2422	27.2628	27.0984	27.7715	26.8606	27.0866	26.7489	27.2327	27.0025	26.2155	26.9006	27.3031	26.4717	27.0565	26.8055	27.1984	27.1704
XP_004602117.3	22.5878	21.7953	24.7626	26.0064	25.7024	22.7713	21.4161	22.7365	19.2546	22.429	24.2784	24.5572	24.0006	23.591	23.8424	24.6065	27.1537	24.8783	26.4431	24.5133	25.7409	26.5647	24.5999	26.1916
XP_054983532.1;XP_004602124.1	24.1162	23.3397	23.8584	22.6968	22.7853	23.3467	22.9841	22.3641	22.5622	23.2707	22.3089	22.4096	21.9824	22.0028	22.8675	22.7661	18.4327	22.5847	22.4908	22.2957	22.4213	21.8887	22.7805	22.734
XP_004602158.1	24.7959	24.3866	25.9927	25.4759	25.4131	24.2074	24.866	25.5261	25.3684	24.3564	25.215	25.6977	25.5718	25.6874	25.7812	25.3995	25.9479	25.1448	26.0107	25.3451	25.1216	25.7526	25.4269	25.7038
XP_004602171.1	20.778	20.2643	22.1705	21.3062	22.7106	20.3551	20.3504	21.3933	21.9737	17.9192	20.5025	22.0097	20.8855	20.8318	18.8188	19.7205	21.1671	20.1552	20.5218	19.7459	22.2201	20.5804	23.8475	20.899
XP_004602183.1	22.5334	21.5812	23.2743	23.2232	22.4232	21.9086	22.3636	22.9418	23.0529	21.8475	23.3875	22.993	23.6055	22.5834	23.4283	23.2654	23.13	23.6353	22.6846	21.7771	23.5483	23.1765	23.3302	23.3228
XP_054977770.1;XP_054977763.1;XP_054977755.1;XP_054977750.1;XP_004602196.2	21.2792	20.2209	22.4511	21.7814	22.1077	20.9598	21.5658	21.1464	21.2738	21.7005	21.5736	20.9737	21.1643	19.3226	20.0784	22.7979	22.1682	22.0771	22.068	22.4365	22.655	22.0617	23.4475	22.5574
XP_054990928.1;XP_054990919.1;XP_054990913.1;XP_004602212.1	22.3456	21.4471	22.3265	22.9159	22.9802	21.5663	22.1477	22.8461	22.8992	22.478	23.2244	23.1575	23.2549	22.4558	21.8736	21.8003	21.1805	21.1518	21.7821	21.3357	20.9144	21.1006	22.9223	20.7532
XP_004602251.1	19.3581	20.0863	22.2098	22.7204	20.8813	21.1729	21.9255	21.3115	22.8501	22.7311	21.5342	22.45	21.2888	21.5011	20.9841	20.6353	23.1027	19.2188	19.7532	20.4713	22.7478	20.398	22.3071	22.8741
XP_004602252.2	21.9087	21.7509	23.4608	23.1644	22.983	22.4086	21.4519	23.1424	21.9538	21.1404	22.1663	22.6953	21.8549	20.2167	21.4432	22.1249	23.1086	21.6172	22.6487	21.5248	23.0936	23.4471	21.3925	23.5367
XP_054975711.1;XP_004602261.2;XP_054975696.1;XP_054975693.1;XP_054975718.1	21.5169	19.9525	23.7739	24.1213	24.0962	21.7171	21.3221	21.7021	22.116	21.9582	22.7162	23.7487	23.0574	22.8545	22.19	23.2075	24.6177	23.3322	24.1836	23.7295	23.8018	24.6148	23.7377	24.7557
XP_054983946.1;XP_004602271.1	26.6308	26.5024	26.1231	25.8748	26.5733	26.7482	26.143	26.7301	26.242	25.6777	26.4527	26.4975	26.7096	26.5914	25.9952	26.1214	26.2358	25.6114	26.4431	26.3025	26.0329	26.0498	25.9042	26.8305
XP_004602362.1	28.7484	27.8055	28.4934	28.3066	28.5329	27.9395	28.1923	28.3324	28.3557	28.9131	29.1707	28.5153	28.578	28.3727	28.9674	28.6865	29.4456	29.3805	29.0413	28.1161	28.1604	28.8125	28.5668	28.6655
XP_004602370.2	24.7802	24.2964	25.0799	25.4048	25.2861	24.7353	23.7959	25.3552	24.4404	23.7667	25.5639	25.5919	25.3898	24.9555	25.3999	25.3699	26.3792	25.5049	25.6402	25.4077	25.8156	26.3192	25.9814	26.2445
XP_004602371.2;XP_004602372.2	20.8854	20.8769	21.2512	22.8622	20.4213	22.3816	25.0141	21.656	22.2626	21.7799	20.1767	22.7894	22.15	22.0907	19.2416	20.8645	20.9221	21.4338	19.8756	18.5158	26.6234	20.6477	19.8234	21.953
XP_004602380.1	24.1654	24.6793	24.1638	22.9383	23.5041	24.5176	24.4031	23.922	24.1942	23.3483	23.7462	23.5926	23.668	23.5638	23.548	22.0157	24.183	23.3797	23.1726	23.4687	23.7951	23.4389	23.9337	24.255
XP_004602384.1	20.9982	21.2878	20.9733	20.6786	21.3452	18.3994	22.8021	21.2572	19.3386	21.3561	22.7806	22.2589	20.9682	22.0854	22.2089	21.1311	21.3378	20.7554	21.9157	20.2738	20.1177	19.8892	21.7859	21.9809
XP_004602419.1	25.6197	26.1235	27.518	28.0595	27.186	25.3419	25.8106	25.0026	27.0658	23.8848	25.8471	25.4977	25.7837	26.5691	24.7666	25.0341	25.1625	26.4996	25.5549	25.9601	25.8984	24.4633	27.3652	27.1632
XP_004602423.1	19.4804	18.8717	20.313	19.4927	19.7068	21.1885	21.0046	19.2519	20.6132	20.8703	21.9462	19.3128	20.8755	18.5303	19.3663	21.1265	20.6506	21.751	22.3421	20.0641	21.0516	21.7668	21.0577	20.3195
XP_004602426.1	23.3027	22.6978	22.9738	22.5432	21.2298	22.9185	23.2437	22.4542	21.8287	22.4542	21.4398	21.8845	23.0149	19.5923	19.2918	21.2886	21.6767	18.9083	21.657	22.2782	22.4174	21.9902	22.0876	22.6447
XP_004602457.2	22.0657	21.9246	22.1534	22.4073	21.9373	21.0012	22.1957	22.2626	23.133	21.425	21.4275	21.8816	22.4087	22.3013	21.9361	20.0904	22.4959	22.3056	22.0427	21.4125	21.4013	22.4652	19.8802	21.9892
XP_004602468.2	21.4174	20.844	22.026	21.8764	21.9866	21.4911	22.278	22.1172	22.4792	22.0436	21.4616	21.7877	21.8423	21.27	21.292	19.4377	19.0807	20.8733	21.1618	21.0391	21.4566	21.0998	22.3716	21.5173
XP_004602475.1;XP_054983170.1	24.2001	22.9246	24.0812	24.0922	22.6426	24.1965	23.725	23.8382	23.973	24.4671	23.93	22.9166	23.9692	19.3858	24.2889	23.5599	22.4689	23.6935	24.1777	23.8574	23.329	23.5896	23.8846	24.6982
XP_004602476.2	21.7065	22.1423	22.3249	22.3314	19.3221	21.3836	22.1504	23.2107	22.4046	22.1192	21.4966	22.2047	22.4053	22.2754	21.4586	19.6564	19.8662	21.6952	20.7665	18.4694	20.4805	20.0039	21.8097	19.2048
XP_004602483.2;XP_054983566.1	20.3213	20.5429	21.7522	21.8885	22.626	18.6554	21.6101	21.7448	18.8632	19.6451	21.5095	22.1579	22.0429	22.162	19.4576	20.8555	22.4021	21.2618	22.7973	22.3025	22.2529	22.8668	22.5424	21.7729
XP_004602484.1	23.5658	23.3024	22.749	21.276	19.1531	23.9863	22.7593	23.6413	22.614	23.9404	25.9093	24.0988	23.7583	24.037	25.0307	23.9236	24.5842	23.8041	23.5394	23.084	24.276	22.0642	22.4927	22.8663
XP_004602544.1	23.3344	19.3407	23.2512	23.7687	22.3416	22.4722	23.4727	23.1482	22.2074	22.0959	23.8504	22.3075	22.7607	22.1924	23.1234	22.8224	23.8006	22.8374	23.859	18.2696	23.6671	22.6341	22.7473	23.2974
XP_004602718.1	21.9308	21.5971	23.2061	23.8796	24.2119	21.8656	22.7189	23.0461	23.1225	22.3556	22.5122	22.9154	22.823	25.6407	22.6545	21.8538	22.9072	20.845	22.5864	22.2891	22.9505	22.9007	23.1181	23.3299
XP_054974321.1;XP_054974320.1;XP_004602793.1	20.9479	19.9908	19.391	19.1109	19.2512	22.016	24.9188	18.9816	19.2056	17.6481	20.9949	20.1226	19.7875	18.9201	19.4021	19.1632	18.2015	17.1845	18.8502	19.9215	25.452	20.2137	20.1115	19.591
XP_004602803.1	21.2172	19.1381	19.417	22.0337	21.1346	19.7931	19.5237	20.4242	19.6583	19.6995	21.2257	21.1193	20.8259	22.5487	19.5668	19.2297	22.2603	19.7999	21.2148	19.7296	21.2526	22.1636	20.1882	22.7749
XP_004602806.1	21.8738	19.6944	20.9996	20.1744	19.531	22.2959	19.0271	21.8194	20.431	18.4889	19.1027	22.9395	22.9341	22.3404	23.0218	19.094	20.5454	22.5129	22.1894	19.5736	19.865	21.0778	19.1655	20.2649
XP_004602810.2;XP_054974267.1;XP_054974266.1	20.2303	18.5638	23.5146	22.7464	22.6527	20.4158	20.6013	21.385	20.7641	20.8025	21.5672	23.0706	21.7211	20.6266	22.3782	22.2309	22.6296	21.2063	22.9991	20.9219	22.6206	22.1449	22.8508	22.3931
XP_004602835.1;XP_054974520.1;XP_004621716.1	21.5042	20.4253	23.0693	23.6934	23.9162	21.9717	22.7642	22.7869	22.8139	22.2045	23.6762	23.9414	23.3171	23.6123	22.8265	23.4931	24.8947	23.8755	24.6715	23.4935	23.7244	24.2356	24.1468	24.3773
XP_004602884.1	22.7572	22.9266	20.3478	21.8963	22.5836	23.4669	25.2099	22.3871	21.8265	22.8103	22.1696	22.1911	21.9985	22.8533	20.7912	20.6017	21.1178	21.7116	21.955	20.9348	26.4307	22.2037	21.1746	22.072
XP_054974211.1;XP_004602912.1	18.67	19.5439	18.7784	19.7017	19.5694	20.2313	20.1733	20.7868	20.9594	19.4077	26.8476	19.9452	18.884	20.4636	19.9435	19.6056	18.6093	19.0092	19.2341	19.7298	19.9845	19.5339	20.0463	18.5043
XP_004602940.1;XP_054997571.1	22.8096	22.9874	23.8925	22.4694	22.9704	22.9832	23.9053	23.6043	24.0391	23.689	23.4253	24.1812	24.3002	24.1379	24.3888	24.0578	23.2235	23.7532	23.2394	22.5957	23.0869	22.141	23.991	22.2996
XP_004602963.1	19.4851	19.6933	21.6441	21.7874	20.4233	19.5485	20.1444	21.245	21.926	19.8487	21.782	20.3986	21.27	21.7586	20.138	20.9131	21.2518	19.5174	20.3426	22.7476	19.3213	21.3011	21.5326	21.6205
XP_004602996.1	23.6672	23.5733	22.3603	21.6395	23.772	23.0231	19.211	23.171	23.1418	22.1131	23.8394	23.3026	23.5709	23.4461	23.6327	22.8161	18.556	22.6156	23.3732	22.5962	23.1094	22.9071	24.7321	21.959
XP_004603013.2	21.0439	20.0962	22.1838	23.8548	22.1711	19.323	19.8253	21.4177	19.0546	19.8481	20.4918	21.5177	19.9431	20.7041	18.8928	19.2593	23.7433	20.8217	23.0612	18.9361	22.2855	22.811	19.2184	22.1712
XP_004603046.2;XP_004603045.2;XP_004603050.2;XP_004603048.2	21.776	21.1996	22.805	23.4968	22.8031	19.1979	21.7763	21.9363	21.6932	22.0064	22.2785	22.9283	22.1911	23.1929	21.2783	20.5858	22.4248	21.5444	23.3852	22.6544	22.0639	23.3048	23.7373	22.7981
XP_004603080.1;XP_054984818.1;XP_004621141.1	20.3794	17.6858	22.8278	22.2166	24.0893	20.54	18.8789	21.2437	21.9168	18.0609	21.9707	21.7208	22.4302	18.5026	21.8596	19.1421	22.3181	20.5412	19.0485	18.8212	23.0828	20.7516	23.4077	22.0742
XP_004603082.1	24.1632	23.5236	23.9718	23.3305	23.544	24.1166	24.4181	24.5522	24.6337	23.9592	24.9529	24.2536	24.5381	24.4556	24.8713	23.4057	22.8599	23.8224	23.4206	22.9871	22.728	22.8139	24.3361	23.3588
XP_004603094.2	21.2851	20.6436	24.8949	26.5302	26.0366	22.4174	19.1817	23.3574	23.1895	22.6513	24.4001	25.1478	23.5422	23.5437	21.9619	24.5787	26.7167	24.701	25.7359	23.9113	25.7953	25.5164	24.1294	25.2648
XP_004603109.2	19.4818	20.1241	21.6992	19.7898	21.4395	19.8571	20.9175	20.4874	19.4295	18.6847	21.538	19.2038	20.729	19.2832	21.5945	20.9952	21.3452	20.8185	21.2271	19.3356	21.0489	18.2268	21.3324	21.0789
XP_004603161.2	19.8644	19.0997	20.8211	21.233	21.3958	19.9148	19.5074	18.4651	20.753	18.5279	19.0373	19.1981	19.3768	18.0777	20.7016	21.063	21.1117	19.9855	20.3805	19.6171	19.6335	19.8543	19.2539	21.5778
XP_012791619.2;XP_004603206.1;XP_054997693.1;XP_054997692.1;XP_004603207.2	24.8574	24.2058	24.6151	19.5404	18.8768	22.9844	23.4311	24.5055	22.8012	19.0948	24.137	22.9456	23.0778	22.8865	23.6438	23.2359	22.1972	22.7304	20.3093	22.8698	23.3906	22.1614	22.0885	23.8077
XP_004603270.1	19.3252	19.1454	21.7824	18.8266	18.97	18.3051	19.4851	20.0784	18.4676	19.448	21.4582	20.3448	18.5549	21.7466	21.5751	21.3594	22.684	18.7239	21.7016	19.5386	21.2591	21.4331	21.8103	21.9957
XP_004603285.2	22.3692	20.8805	21.7469	20.1726	19.9354	22.4201	21.0949	20.4815	19.3881	20.4102	20.1608	20.4618	21.043	18.7891	19.0809	19.1024	21.3594	21.3758	21.8384	22.1809	22.3648	21.1828	22.3084	22.0921
XP_004603296.2;XP_012790586.2;XP_004619191.2;XP_055000860.1	22.9879	23.0505	23.0229	22.7476	22.8837	22.7813	23.4497	23.2771	23.6368	23.2753	23.3306	22.2633	22.3529	21.8892	22.8766	22.8089	20.9193	22.2214	22.1001	21.7559	22.7639	22.5989	19.7107	22.9839
XP_004603362.3	20.6309	19.66	19.651	18.5883	18.967	19.277	20.3295	20.4092	20.3432	19.9789	20.654	19.6694	19.2975	19.235	19.2399	19.6374	20.6492	19.4195	19.3289	19.5836	19.8806	20.1735	20.6534	20.821
XP_004603374.1	25.0229	24.9147	24.9077	22.5617	24.8617	25.3904	24.8079	24.4348	25.2269	26.358	23.269	24.5517	24.1014	24.6545	24.3538	25.2132	22.6984	24.318	23.2451	24.8772	23.5866	24.4083	24.9447	24.6132
XP_004603396.1	24.105	22.4612	23.8977	24.2158	23.6027	23.8805	23.4205	24.5613	23.7942	23.3988	24.6595	24.5879	24.2292	24.0222	24.4307	24.9201	24.7495	24.111	25.2201	23.9412	24.2674	24.8765	23.8217	24.6529
XP_054996574.1;XP_054996573.1;XP_054996572.1;XP_004603400.2	22.6921	21.2185	22.859	23.6313	23.812	23.2274	21.0856	19.4486	23.4015	23.48	23.4817	19.691	24.3108	24.2211	23.4047	22.4678	22.6171	22.1403	23.2838	23.498	20.5768	21.0656	23.1383	22.3568
XP_004603416.1;XP_054996087.1	18.7469	18.6761	21.3987	19.4464	20.3343	19.0556	19.7916	21.5674	21.6839	21.7762	19.158	19.7135	21.8702	19.5654	20.0348	21.5476	22.0706	22.1418	21.5375	20.5558	21.6911	20.7722	22.811	22.0631
XP_004603444.1	21.321	18.2527	21.81	22.0944	23.0697	21.3699	20.4965	21.1547	21.4197	21.5454	22.3142	22.1659	21.4616	21.8204	21.5875	21.9548	23.7992	21.5301	23.2107	21.9384	21.5243	22.6736	20.9831	21.5767
XP_004603454.2	21.8226	21.4912	23.4399	22.8995	22.5186	21.3206	21.4866	22.2497	22.2829	20.443	22.5521	22.2985	22.8	21.7862	22.8937	23.3898	22.5784	22.336	22.2392	22.3927	23.6794	24.0656	23.6603	23.2358
XP_004603479.1;XP_054994464.1;XP_004603477.1	19.7842	18.9099	20.906	19.7318	18.5303	20.5545	20.7266	22.0236	20.0482	19.9055	19.9783	20.4603	20.2194	18.7267	19.5798	19.5464	19.2887	18.869	20.1078	19.8581	20.6056	19.0359	20.8464	18.2472
XP_004603488.1	26.6137	26.5609	26.8127	25.5107	25.0932	26.2291	27.1202	27.241	27.1942	25.8289	26.9641	26.8397	26.8673	26.921	27.3069	26.007	25.0383	26.0456	26.1992	25.5081	25.6807	25.4666	26.714	26.2605
XP_004603493.2;XP_054995126.1;XP_054977279.1	24.0168	23.7457	24.6721	24.4503	24.1362	24.3551	24.0629	24.3204	23.8472	24.0178	24.1274	24.4804	24.3959	23.9513	23.763	23.9115	24.6574	24.0943	23.8773	23.6747	23.9125	24.5256	23.9048	24.3437
XP_004603510.1	22.2813	21.63	21.6145	22.578	23.1122	21.9939	22.7217	22.7531	23.0028	21.9153	22.959	22.2237	22.3328	22.5285	19.6245	21.9227	22.6025	21.959	22.7317	18.6891	22.3682	21.8964	22.1432	21.892
XP_004603524.3	23.842	24.1338	23.334	22.2839	23.2502	23.5543	22.8835	23.249	23.4077	23.226	23.1566	22.7666	23.4848	22.5781	23.1343	22.6824	22.141	22.9633	22.6373	22.8566	22.9484	22.6397	21.9895	22.3217
XP_004603536.1	22.9479	24.9385	21.2762	23.6085	23.1734	20.6216	23.1468	23.3261	23.4694	22.7077	23.715	18.9939	23.966	23.8074	18.9606	19.5484	23.3689	23.3564	21.999	20.9339	21.3701	22.4735	22.3894	19.0446
XP_004603539.1	23.5912	23.0636	24.1804	23.3619	23.0211	23.747	24.0204	23.841	24.0651	23.1085	24.0413	23.3024	23.9084	23.1551	23.3507	23.3198	22.7054	23.1557	23.0949	23.0738	22.85	22.3432	23.535	23.4175
XP_004603558.1	22.846	22.786	23.1445	21.9361	22.2432	22.7078	22.7234	23.5052	23.3177	21.9331	23.4923	22.904	23.2113	22.2617	22.5827	22.8766	23.0397	22.7149	22.4395	22.8827	22.3123	23.078	23.0532	22.8463
XP_004603566.1	22.1866	18.9702	21.5141	19.9501	20.7476	18.8404	20.763	20.1125	20.4834	19.386	18.3265	20.468	20.6609	20.315	19.4644	20.1851	19.7488	18.8434	19.7795	20.9948	18.6571	20.5818	19.0567	21.0832
XP_004603567.2	23.4147	22.7384	26.0362	22.2215	23.6015	23.0968	20.3204	23.8236	23.013	24.2975	20.2913	19.4733	23.2792	20.0933	25.6915	24.1174	18.5714	22.3579	19.1718	25.384	24.5632	25.4515	20.8184	23.5174
XP_054996306.1;XP_054996305.1;XP_004603573.2;XP_054996307.1	21.9523	19.3121	22.6315	20.3952	18.884	20.9957	21.2905	19.2231	18.8147	22.1735	19.9451	22.0783	20.5935	20.234	19.2376	20.274	18.5262	18.3806	19.9264	18.1981	19.8525	19.7907	20.3308	19.7045
XP_004603711.2	22.6741	22.7183	21.6908	23.8061	23.6023	22.8003	22.0483	23.0274	22.1234	21.152	23.8851	24.1747	23.1021	23.4099	22.9164	23.6937	25.2275	22.7892	24.7217	23.567	24.1646	23.4573	23.4051	24.4607
XP_004603727.2	23.2533	22.6776	24.4553	25.038	25.0726	22.9399	22.8724	22.8723	23.0419	23.5746	24.341	24.5892	23.3105	23.4456	24.1138	24.1561	25.54	23.5547	24.7349	23.7853	24.2862	24.9051	23.9336	25.2067
XP_054996824.1;XP_004603779.2	22.6816	18.2414	22.0158	22.3422	22.2313	18.6752	22.3548	21.3102	22.1396	22.0572	22.6524	21.9279	19.5964	22.3185	20.0437	21.9165	21.9429	22.1231	22.169	21.7672	20.6589	18.6035	20.5679	17.6863
XP_004603850.1	23.6307	23.5995	24.4762	24.7619	24.1595	23.6206	23.9298	24.1178	23.6619	23.6598	24.4534	25.0088	24.4359	24.51	24.3956	24.4919	25.8036	25.0684	25.4741	24.6373	25.3134	25.1337	24.8822	25.2073
XP_004603868.1	22.26	21.0347	23.5853	22.9902	21.6811	21.1322	22.1068	21.5077	22.2824	21.7613	22.4208	22.7427	22.711	22.6098	23.4126	21.7181	21.1504	20.5407	22.8435	21.2374	21.6584	21.843	22.9017	23.3753
XP_004603898.2	19.2919	18.8776	23.7469	22.7223	22.2132	22.8753	23.426	22.9116	23.8076	19.1043	23.0654	23.9349	22.6856	22.2778	22.9449	22.1708	19.5976	21.96	22.4579	21.8431	18.4758	19.8557	22.4506	22.6282
XP_004603953.2	24.9356	23.8094	24.5589	23.9286	24.1759	18.9407	24.826	24.1729	24.7892	26.4787	23.2607	24.8348	23.5258	24.4732	24.4056	23.521	23.2171	24.1541	23.9401	24.7421	23.6572	24.2851	24.4941	24.3844
XP_004604114.1	23.7492	23.3355	23.3802	23.0805	22.8091	23.5702	23.5304	23.3177	23.2857	23.2353	23.384	22.7711	22.9803	22.5727	23.1415	23.4085	22.8613	23.1448	23.6518	23.5665	23.8123	23.4826	23.5932	24.1073
XP_004604156.2	21.1456	17.7072	19.7872	23.0839	20.2942	19.5861	21.0326	21.8804	20.961	21.9098	17.3819	23.624	21.4608	22.4599	23.1011	23.2076	25.1635	23.7368	24.6631	23.2435	24.6222	24.9222	23.2203	24.8415
XP_004604162.1	21.3768	20.9715	22.9542	22.3215	20.6354	21.6699	22.3271	21.3984	22.4268	20.7788	21.7687	21.5994	21.8937	20.602	20.6405	20.9525	20.6817	19.508	21.2113	20.5549	21.6933	19.451	21.6666	22.6137
XP_004604163.1;XP_054980639.1;XP_054980649.1	25.0334	23.618	25.681	26.8134	26.7189	24.911	24.7417	25.6209	25.4043	25.7669	25.8891	26.1531	25.705	26.4312	25.3465	26.1505	27.6806	26.2922	26.7953	26.2938	26.3765	26.7665	25.4502	26.6269
XP_004604193.1	21.4463	21.8079	21.6693	20.186	21.5688	19.1379	21.9577	20.3777	22.2437	20.2296	21.0521	20.2847	21.4773	22.8707	18.1927	21.2507	19.4016	20.9499	21.3975	22.5301	22.5712	21.892	19.4768	22.4051
XP_054992802.1;XP_004604194.1	25.9246	25.5154	26.359	26.6378	25.605	25.7418	25.7619	25.6956	24.9704	24.8483	25.7409	26.7443	26.2496	25.7912	25.4989	25.4619	26.6726	25.8523	26.8039	26.5939	27.2621	27.1181	26.0481	26.77
XP_004604245.1	26.7406	26.396	26.6203	26.5951	26.096	26.8532	27.0382	27.4809	26.9738	26.2665	27.3201	26.9098	26.8443	26.5759	26.5779	26.1357	26.5972	26.3342	26.6213	25.7823	26.24	27.5114	26.4202	26.6234
XP_004604246.1	23.4669	23.1909	24.3804	24.4839	23.7958	23.1658	24.3727	24.3502	24.1292	23.1254	23.8761	24.1306	24.3611	24.0604	23.8029	23.7364	24.1096	23.4039	23.7483	23.0095	23.4968	24.071	23.9559	24.302
XP_054991438.1;XP_054991437.1;XP_004604249.1;XP_054991436.1;XP_054991435.1;XP_054991439.1	24.2077	23.6587	24.7455	23.6224	23.8098	24.3883	23.9385	24.1619	23.8635	23.6248	23.6296	23.9889	24.0325	23.7566	24.3029	24.4394	23.1109	23.9095	23.9177	23.3649	24.3237	23.402	24.1794	23.7246
XP_004604261.1	24.4011	27.3216	26.5822	25.5427	24.9358	25.8085	23.7918	25.5412	24.0664	18.863	24.7031	22.0967	24.8367	24.4314	23.3632	24.3599	23.1261	23.8705	23.4814	23.4957	25.1162	22.68	22.6343	22.7966
XP_004604281.1;XP_004604280.1	34.4502	35.0779	33.702	33.1782	35.2167	35.5748	34.927	34.2462	34.8719	35.5418	33.4651	33.6692	33.5397	34.3283	34.1199	34.6604	33.7858	33.946	32.6316	34.4543	32.631	33.4348	34.2699	33.6667
XP_004604284.1;XP_004604283.1	25.739	19.6492	19.2077	19.7723	19.6933	27.3275	25.1174	24.5035	25.9671	19.562	22.916	25.0173	25.6777	25.2024	19.2063	18.8328	19.2163	25.0173	19.5231	19.7853	20.2301	19.3886	20.0203	18.7376
XP_004604294.1	28.5759	28.0858	28.8016	28.0343	28.1986	29.0472	29.3444	28.972	29.4005	29.3802	29.8149	29.2627	28.9747	28.8727	28.8765	28.4231	28.0694	28.0865	28.1637	27.5433	28.3199	27.771	28.5168	28.3072
XP_004604355.1	19.2241	19.324	20.494	21.9832	20.4982	18.9103	20.4565	21.3273	19.0988	19.5327	21.8744	22.8283	20.7802	19.5072	20.748	19.3492	23.7323	19.9724	21.5466	17.5155	22.5651	21.2164	21.3954	19.4493
XP_004604390.2	19.7814	18.5865	19.3937	20.0987	20.5002	21.0979	21.4318	21.6902	22.3825	20.2818	21.1863	20.617	19.049	19.6147	20.1458	19.2337	18.9123	19.7612	19.0586	18.7504	19.4754	19.0502	21.9819	18.4532
XP_004604455.1	24.9225	24.7027	24.6099	24.25	24.8099	25.1067	24.9595	24.7063	24.9921	24.8155	24.9664	24.9799	24.7494	24.5135	24.3624	24.0536	24.4809	24.7142	24.4539	24.4088	24.1923	23.959	24.4649	24.3327
XP_054991448.1;XP_004604463.3;XP_054991449.1	22.2509	21.1203	19.9945	20.6799	20.4055	21.7298	21.8457	21.5024	21.8544	22.6739	21.6668	21.4157	21.8027	20.7224	18.8882	19.0446	18.3197	19.4793	20.9879	18.8026	20.376	20.3394	21.4638	18.134
XP_004604505.2	19.9979	18.6553	19.8969	20.5594	19.0323	19.7117	19.9014	19.8053	20.5353	19.45	20.9603	18.7709	18.811	19.1392	18.7867	18.443	19.3453	18.4555	20.5376	20.3932	21.4907	20.3059	19.7483	20.5193
XP_004604573.1;XP_004604572.1;XP_054996331.1;XP_004604575.1;XP_004604574.1;CON__Q2KJC7	21.6526	18.9889	19.7484	21.2078	18.7308	20.1862	22.1212	21.5118	20.1819	19.4313	18.6297	19.6603	20.0007	16.5716	20.6999	19.2586	16.6955	18.4263	19.2178	19.1458	26.1416	16.8055	20.2429	19.3285
XP_004604597.2;XP_004604596.2;XP_004604599.2	19.0067	18.9328	22.1613	21.9624	18.5226	19.9613	19.8097	21.8871	20.1808	19.3104	19.2086	19.3931	19.2946	18.6624	18.9874	19.3231	19.2003	19.6165	20.4844	19.4707	21.2475	20.8741	21.8998	20.6874
XP_004604611.2	24.0798	24.3687	24.4406	24.6733	25.2891	22.7026	24.6613	23.7064	22.4881	24.4175	24.3068	24.0791	24.1684	24.2649	23.5589	23.4185	23.0869	22.6567	24.3909	24.5784	23.5781	24.1187	23.542	24.2508
XP_004604617.1;XP_054996489.1;XP_054997176.1;XP_055001226.1;XP_054997163.1;XP_054997172.1;XP_054986377.1;XP_054979671.1;XP_055003302.1;XP_054992939.1;XP_054979672.1;XP_054978834.1;XP_054983994.1;XP_054982736.1;XP_054984505.1;XP_054974206.1;XP_054978918.1;XP_054980501.1;XP_054993029.1;XP_054992495.1;XP_054986510.1	25.025	23.2549	24.5466	24.5954	20.1096	22.9093	24.1848	25.1075	23.4601	21.8839	23.6518	24.5198	24.751	23.9528	24.0822	24.7639	23.8254	23.5392	24.3393	22.9708	24.5894	24.5486	24.8685	24.1827
XP_004604627.1	22.1833	20.0141	23.506	25.1585	24.6601	21.3622	17.9787	21.0485	21.1836	20.1954	23.2601	24.0624	22.515	22.1294	22.6287	23.5709	25.6513	23.5706	25.1674	23.1726	24.7118	25.8075	23.043	25.093
XP_004604630.1;XP_055000854.1	21.264	21.3911	22.0415	22.3248	21.5136	19.1802	20.7873	22.5653	22.0214	20.9614	21.5336	22.8902	22.152	21.6817	21.8265	22.167	22.5663	21.0641	22.0478	22.5475	22.4907	22.8373	21.5038	22.567
XP_054994287.1;XP_054994281.1;XP_004604632.1	22.15	23.4107	21.5347	21.0732	19.791	21.0844	22.333	22.1455	21.2367	21.4517	22.8213	22.9248	21.0969	21.3095	21.9807	21.2679	20.8968	19.6919	20.3884	19.476	23.6302	19.7474	21.3353	21.7422
XP_004604748.1	23.2094	23.5062	23.4746	22.9735	19.2286	24.4107	23.5304	19.4714	23.3492	23.4371	20.7551	23.5089	19.9069	22.3798	19.4228	18.4878	22.3351	18.5587	18.8708	17.9918	21.7796	21.9752	19.8983	23.2852
XP_004604752.1	24.465	23.2194	24.3105	23.2366	22.5493	23.6834	23.6412	23.3826	23.8533	23.9425	23.3453	23.8198	23.3359	24.1009	24.3012	24.2624	22.3707	24.0053	24.0043	23.6712	23.9406	24.402	23.8145	24.2631
XP_004604763.2	20.0773	19.1749	19.2602	20.3983	20.3795	19.3916	21.1118	21.7698	20.0692	20.6089	22.0683	21.0418	21.696	19.3931	20.3561	19.3333	22.9558	22.654	22.0941	21.456	22.0779	21.0487	20.656	20.7684
XP_004604771.1	21.9727	21.2716	21.569	21.96	21.2079	21.8662	24.852	21.9563	21.998	21.462	21.4497	21.25	21.6267	21.224	21.5268	20.1873	21.2063	21.0764	21.2428	21.4966	24.9251	20.9911	21.6838	21.6554
XP_004604781.1;XP_054973960.1	24.0076	24.1146	24.2258	23.9718	22.4317	24.1923	24.3998	24.7115	24.0265	23.1232	23.9933	23.7282	23.5188	24.5882	23.5798	23.6808	24.3576	23.7707	24.6209	24.1573	24.3138	23.5683	24.4441	24.6034
XP_004604782.2	27.2429	27.4756	27.0117	27.373	27.0073	27.2086	26.9454	27.2069	26.7766	26.7383	27.7791	27.1506	27.0988	27.3471	26.9877	26.7949	27.1502	27.3766	27.2046	27.2309	26.6352	26.0021	26.8348	26.8323
XP_004604795.1;XP_054996860.1	24.8184	24.8758	24.2439	24.2517	24.262	24.664	25.3263	25.3746	24.7899	24.1046	24.8734	24.2674	25.071	25.3766	24.4143	24.0005	24.3176	24.6773	24.4749	23.9368	23.4296	24.6519	24.3097	24.0214
XP_004604817.1;XP_055000450.1	26.8008	26.0245	27.394	27.0763	26.5151	25.9972	26.655	26.8357	26.7985	26.0964	26.6861	26.8411	27.2152	26.3412	26.6085	26.3681	26.2144	26.2374	26.4406	26.2772	26.7601	26.6958	27.0584	26.8094
XP_004604886.1;XP_054986073.1;XP_054986072.1;XP_054986075.1	23.9142	23.1271	23.7003	24.7907	22.685	23.1009	24.2069	23.0484	23.3777	22.2021	22.776	24.2213	24.4944	22.9607	23.6677	23.7009	23.0482	23.5932	23.6709	24.0812	24.0795	23.8431	24.37	24.1248
XP_054987780.1;XP_004604893.1;XP_004608286.2;XP_012789660.1;XP_054986461.1	25.6285	25.8836	25.175	25.3115	25.5868	26.0317	26.4226	26.3082	25.9186	25.1997	25.9785	25.8259	26.1542	25.3598	25.2491	25.1646	24.9736	25.3907	26.0299	25.0223	25.4354	25.2666	24.756	24.8305
XP_004604920.1	23.4082	22.5838	23.8757	24.124	24.2478	22.7094	23.247	23.6889	23.5759	22.7553	23.3601	23.8079	23.5622	23.4733	22.7056	23.0947	24.0561	23.1787	23.8754	22.3758	23.8418	23.7884	23.9484	23.9382
XP_004604939.1;XP_004618928.1;XP_004614079.2	26.6181	25.7937	26.7244	26.2045	25.8567	26.6108	26.2651	26.4425	26.0558	25.6847	26.4742	26.1381	26.5945	25.5975	26.4038	26.1089	26.1339	26.1129	26.768	25.9481	26.1339	26.1657	26.0221	26.3445
XP_004604979.1	22.5685	22.7266	23.0826	22.9086	23.1651	22.961	23.0808	22.6918	23.0846	22.8492	22.3537	22.7461	22.6356	22.3122	22.0955	22.4843	23.006	22.2393	22.9037	22.478	22.5754	22.7071	22.6199	22.8229
XP_004605001.2	26.5202	24.5852	25.5606	25.4762	25.1297	25.8574	26.2616	26.3559	26.5445	25.0409	26.1586	25.325	25.8805	25.4778	25.1481	24.6812	24.5343	25.2684	25.544	25.789	25.4303	25.4312	25.5126	25.5506
XP_004605044.1;XP_004605043.1	22.3363	20.5431	20.8981	20.4542	20.7425	20.7181	20.4092	18.4824	21.1292	19.026	21.6193	18.2145	20.4799	18.977	20.1729	19.6302	20.2846	18.4801	19.7085	20.6492	18.4702	19.2402	20.5909	19.077
XP_004605045.1;XP_054986305.1	26.5522	26.6377	26.9226	26.7052	26.5871	26.2578	26.8124	27.3964	27.0852	26.246	26.9986	26.6668	26.9811	26.5405	26.5906	26.0855	26.0978	26.424	26.2921	26.1299	26.3514	26.3219	26.9993	26.2436
XP_054998686.1;XP_054988319.1;XP_004605078.1;XP_054989307.1;XP_054993805.1;XP_054999365.1;XP_054994065.1;XP_054985596.1;XP_054975614.1;XP_054996048.1;XP_012790574.2	25.4505	25.5586	26.4308	25.7702	25.4554	26.1446	26.3912	26.3843	26.2243	25.5929	26.6072	26.7609	26.3919	25.7128	26.3694	26.1521	25.3908	26.3866	26.1023	25.6987	25.6447	26.0707	26.1334	26.0801
XP_004605080.1	19.6279	18.7704	20.8629	19.915	20.3482	21.7845	21.8709	21.2934	22.486	22.0934	23.4315	21.7918	22.2337	22.5047	21.0935	19.5213	20.2905	20.4937	20.0099	19.6008	19.1203	21.0815	19.8718	19.9591
XP_004605119.1	26.2416	26.9952	25.9132	25.8308	26.4919	26.9362	26.0002	25.1642	26.3057	26.9586	25.5988	25.8429	25.7922	26.4228	25.5502	25.4502	24.6399	25.4459	25.1208	24.908	24.424	24.1329	25.8392	24.7566
XP_004605120.1	30.1544	29.5565	29.8004	29.3533	29.774	30.7684	29.2816	29.4492	29.8968	30.6244	29.3114	28.936	28.9456	29.333	29.3294	29.576	28.795	28.9143	28.5249	28.4257	28.1996	28.0163	29.5387	28.4562
XP_054987948.1;XP_004605254.2	19.6557	18.4028	21.7429	21.9722	23.1299	20.0326	21.8046	22.348	23.0354	21.6333	22.7232	19.7118	22.2255	21.36	20.9227	21.2961	22.2787	20.1057	20.7392	21.5342	20.6793	22.5517	22.373	22.5059
XP_004605266.1	26.9847	27.0887	27.1553	26.8879	27.2969	26.264	26.3866	26.9786	27.2957	26.3137	27.0819	26.642	26.7535	26.1731	25.1024	25.8679	26.1182	26.2682	26.6796	26.9781	25.4664	26.155	26.8887	25.5281
XP_004605284.2;XP_054987238.1	23.853	22.4592	23.2239	22.9461	22.7815	23.2356	23.0258	23.5822	23.1408	22.2777	23.0266	23.0953	22.7733	23.3479	22.7002	22.2298	23.0311	23.2367	22.6078	22.6701	22.806	22.3076	22.6263	23.2653
XP_004605357.2;XP_055002886.1;XP_055002885.1;XP_004617448.1;XP_055003054.1;XP_012790179.1	21.7533	22.9062	22.9851	22.4543	22.419	22.5233	23.1527	22.6821	23.2815	22.6432	22.9198	22.7	22.3793	22.1986	21.8759	22.0185	22.2929	21.7371	22.4873	22.1823	23.1957	22.3919	22.882	23.4073
XP_004605366.2;CON__Q9TRI1	20.4155	18.7087	18.7061	19.1575	20.0862	20.1891	18.9106	19.8059	19.6697	18.5049	19.6406	19.3944	19.7241	19.7427	19.8926	18.9018	19.8249	18.6124	20.8765	22.0519	22.7056	19.8566	20.9232	20.0257
XP_004605395.2;XP_055002945.1	20.7805	21.9882	21.5987	22.218	20.9133	21.2405	20.9923	22.6232	22.0748	21.4328	21.745	21.9054	19.0232	20.3386	22.5146	21.4005	20.4345	21.9381	21.9315	21.749	21.1903	22.951	22.3318	21.2388
XP_004605401.1;XP_054983340.1;XP_054983339.1;XP_054983338.1;XP_054983792.1	25.1601	26.257	25.1288	25.0452	25.2842	25.1528	24.9442	25.8283	26.3629	24.6947	25.1602	25.5998	25.6029	24.3697	25.1152	22.6695	24.9367	24.1904	23.6568	22.7422	25.4248	21.4937	25.1114	24.3791
XP_055003430.1;XP_004605420.1;XP_004605427.1;XP_004605421.1;XP_004605426.1;XP_055003427.1;XP_055003429.1;XP_004605422.1;XP_054975851.1;XP_054975857.1;XP_054975850.1;XP_054975849.1;XP_054975853.1;XP_054975854.1;XP_054975855.1;XP_054975848.1;XP_054975856.1;XP_054975847.1;XP_054975874.1;XP_054975852.1;XP_054975865.1;XP_054975860.1;XP_054975861.1;XP_054975862.1;XP_054975863.1;XP_054975864.1;XP_054975…	21.8047	21.2214	19.8796	20.2308	21.4591	21.2314	22.6049	22.2203	21.5073	20.3658	20.7416	17.968	19.2799	21.6226	20.7294	21.1826	19.7604	19.937	19.9011	20.675	21.1615	20.7286	20.2154	20.8197
XP_004605484.1	20.7608	20.043	21.8485	20.572	18.708	21.1991	21.2813	20.795	20.9594	20.5272	21.2682	21.2254	21.7442	19.346	20.4505	19.4641	19.3837	20.2776	19.5029	19.1551	19.9268	19.6797	21.3407	19.0507
XP_004605498.1;XP_004605496.1	23.5447	22.2038	24.4683	23.6184	23.5849	23.224	23.5699	23.5979	23.4759	23.3339	22.711	23.3514	23.3059	22.6546	21.9725	22.1039	22.6032	22.4295	22.5878	21.4364	22.8212	21.8407	22.2461	22.529
XP_004605590.2;XP_054992404.1	19.3246	19.438	18.4606	19.5177	19.427	22.1293	21.7078	21.2107	19.7865	18.6768	21.4129	20.5761	20.282	18.6868	23.3853	23.1575	21.7702	19.3518	22.4115	21.0722	23.5957	19.5146	22.1592	22.8425
XP_004605597.2;XP_054979678.1;XP_004605596.2	21.7102	17.7937	21.743	22.3909	19.235	19.7653	21.3903	21.5382	21.9446	22.4245	22.0571	20.3425	20.0529	21.133	19.5743	18.3681	20.6528	21.0276	21.3956	20.2169	22.1611	20.6511	20.9924	21.8267
XP_004605615.2	24.2795	23.5605	24.0532	24.7215	23.9993	23.5774	23.3092	24.0873	23.7601	23.7432	23.0624	24.3138	22.5021	23.4349	21.5243	23.454	23.804	23.8524	24.2034	23.6869	24.4285	24.2656	22.9857	24.0554
XP_004605621.1	24.1909	23.3152	23.8644	21.7935	22.837	23.5573	24.4561	22.8694	23.2798	23.4785	22.9734	22.7286	22.7411	22.292	23.3621	23.5225	22.4329	22.6887	23.1713	22.8228	22.6013	22.8499	22.3948	23.3225
XP_054990726.1;XP_004605700.1;XP_054990725.1;XP_004605698.1;XP_054990727.1	18.5302	22.4768	23.0105	21.0455	22.7476	22.0402	22.6748	22.1552	22.4104	21.3716	21.6429	22.6972	21.9539	19.5911	21.6242	18.5457	20.7123	19.2115	22.1727	19.6413	19.4864	21.4698	21.9469	21.4126
XP_004605764.1	21.9314	21.9552	21.6287	21.4033	21.8437	21.9114	22.389	22.7027	23.1879	23.3533	21.8967	21.7056	21.5656	18.5717	22.0354	21.6937	22.7621	21.4962	21.943	22.034	21.811	22.0447	21.2957	21.4144
XP_004605813.2	25.035	23.495	23.173	22.4614	24.4355	24.8115	24.6727	24.5212	25.2093	24.9762	25.084	24.5946	24.9221	24.1091	23.9317	23.6254	26.0986	24.2905	24.9255	24.2661	23.9715	26.747	24.2489	24.5722
XP_054993132.1;XP_004605819.2	21.8005	21.9792	22.8605	22.4093	21.9816	22.1003	22.8194	19.906	22.5563	22.2749	21.9436	22.0184	22.5047	19.304	22.1477	19.961	21.1547	19.2617	19.493	21.3548	20.4284	21.9366	22.0777	22.08
XP_004605851.2	20.8068	19.8542	19.7331	19.2007	18.8308	20.8063	21.3872	21.1515	19.8325	18.1429	20.4788	20.7992	21.2746	18.7212	20.631	19.2478	18.6397	19.7012	18.5411	19.0971	18.788	19.6587	19.0916	19.4788
XP_004605859.1	21.9511	20.4987	19.7198	21.6173	19.8695	19.147	18.969	20.7842	20.9891	21.6981	18.9197	18.2838	20.5859	20.4068	19.7788	22.6807	20.2433	21.2406	19.3536	21.1552	19.7152	20.5411	21.942	19.9542
XP_004605860.2	23.5949	23.1945	24.9418	24.9294	24.745	23.3732	23.1359	24.0402	23.6204	24.3306	24.9292	25.5117	25.1443	24.3286	24.9485	25.2165	25.516	24.6154	25.6063	24.6736	25.1993	25.8871	25.5264	25.9126
XP_054990908.1;XP_004605885.1	24.3676	23.7161	25.5106	25.8188	25.4966	23.6616	24.3057	24.7493	24.6441	23.6821	24.7967	24.9077	24.5693	24.4827	24.4257	24.2046	25.4771	24.1185	24.9836	23.7511	25.3363	25.3401	25.3973	25.6626
XP_004605903.2	20.7011	19.4659	20.6431	22.2162	22.21	20.6357	18.2264	21.0771	21.1236	20.5732	21.9437	22.6448	22.3521	21.007	20.1803	22.5563	24.5381	21.8339	24.2666	22.5173	23.1209	24.4074	21.6035	24.2051
XP_004621396.1;XP_004605913.1	23.9535	23.4692	24.0893	24.3721	24.3647	23.6786	23.9386	24.8656	23.9654	23.1451	24.4672	24.3277	23.8776	24.0607	24.1877	24.189	24.7381	23.9672	24.7129	23.0931	24.3193	23.9995	24.3344	24.3805
XP_004605915.1;XP_004606022.1	29.3239	30.0772	30.1648	29.5259	29.6433	29.2484	30.143	29.7213	30.1906	29.4181	30.049	30.0129	29.395	30.0209	29.7242	29.1071	29.2324	29.3223	29.3151	29.0249	28.9242	29.0088	30.0606	29.0324
XP_054976794.1;XP_004605961.1;XP_004620338.1;XP_054977049.1	27.0002	26.8774	27.4282	27.5806	27.7292	26.5152	27.0894	27.5499	27.1629	26.3654	27.2637	27.7605	27.5219	27.3009	27.3279	26.8873	27.5897	26.9889	27.2542	26.6146	27.3295	27.4029	27.1215	27.8212
XP_004605964.1;XP_004612434.1	19.161	18.8749	18.8672	19.715	21.0325	19.6696	19.2884	19.6531	18.863	18.8274	20.4781	20.4753	19.0059	20.6468	19.3151	19.9355	18.8651	20.1683	20.3123	20.0882	20.4814	20.9065	21.0109	19.2839
XP_054992619.1;XP_004605980.1	23.3237	23.7632	19.6272	22.6553	20.3459	22.444	24.1924	23.5225	23.512	21.279	20.9923	23.3215	23.6709	24.0251	22.251	18.1019	20.2938	20.7516	22.0628	20.1138	20.3591	20.3692	24.431	20.1684
XP_004605985.2;XP_054990380.1;XP_012787693.2	22.9426	21.9286	23.4156	22.7268	20.7599	22.6335	23.0669	22.9644	23.0248	22.5777	23.0671	22.1007	22.7493	22.4049	20.4634	21.3645	21.5026	21.9975	21.9999	22.664	21.8771	21.3914	22.656	22.45
XP_004606069.1	23.8719	18.1984	23.858	21.9221	21.6491	22.5729	23.278	22.9771	22.6175	23.0546	22.6385	21.2657	21.7718	22.8384	23.4761	22.9345	21.3789	21.9802	22.8421	21.0047	23.3576	21.5833	22.126	23.3988
XP_004606154.1;XP_055001645.1;XP_054983398.1	28.6823	28.0625	29.3326	29.3653	28.7872	28.1391	28.1077	28.6429	28.1454	28.3566	28.4691	28.8411	28.3184	28.5635	28.5833	28.8775	28.9914	28.3702	29.0443	28.7469	28.9158	29.3309	28.5621	29.3515
XP_004606183.2	20.8371	20.8523	23.0284	21.78	21.7213	20.7804	20.7997	21.0396	22.2369	21.9491	22.2042	21.6715	21.6282	19.2485	22.4987	22.2875	21.3046	18.9515	21.7306	21.7066	20.3894	22.7171	23.1748	21.1253
XP_004606206.2;XP_054978036.1	20.1732	18.5629	22.1624	19.3332	19.842	19.884	20.8165	20.2125	20.8817	18.4812	20.9733	21.811	21.9608	19.4806	21.4102	20.9845	19.639	19.3539	20.9557	19.4966	21.9484	19.6483	21.3259	21.8051
XP_004606207.2	19.3286	18.3899	22.3655	24.4403	23.6809	19.6822	20.0853	19.569	19.8914	21.5717	21.9108	22.5774	21.1204	21.0671	20.6107	22.1853	24.7118	22.5166	24.4909	21.7229	23.0979	24.5269	22.5982	23.7601
XP_004606216.1	20.5611	19.653	21.0263	21.7465	20.814	19.1364	18.4441	20.8458	20.7013	20.043	20.1954	21.1854	19.5894	20.5607	20.171	20.4325	21.2799	20.4634	21.2392	18.8083	20.4185	21.8832	21.257	22.4253
XP_004606226.2;XP_055000658.1	25.4055	24.8043	24.9962	24.2538	25.0189	24.5322	24.3872	24.8852	24.7279	24.7337	23.9262	24.6714	25.1239	24.9065	24.8955	25.6793	24.3715	25.3754	24.6647	25.3233	25.0138	24.47	26.304	24.965
XP_004606239.1;XP_054996800.1;XP_054983924.1	26.1317	25.2002	26.7161	26.0038	25.2267	25.6389	26.3274	26.5449	25.9293	25.8787	26.0126	25.4405	26.0485	25.8856	26.2496	25.3881	25.1283	25.6444	25.8722	23.9701	24.9584	24.9622	26.2056	25.6163
XP_004606303.2;CON__P02672	26.3235	25.6518	25.7846	25.3504	26.1403	25.5612	25.4765	25.8222	26.0168	25.9528	24.9425	25.5385	25.9358	25.5718	25.9024	26.7643	25.266	26.1237	25.47	26.3628	25.4783	25.0504	27.0688	25.9527
XP_004606415.2;XP_004606414.2	25.6573	24.753	25.9093	25.7623	25.2882	24.8366	25.0349	24.8546	25.3695	25.1459	25.7455	26.2302	25.1133	24.9838	24.7469	24.1961	25.406	24.6397	25.3568	24.9208	24.6689	25.3634	25.3148	25.31
XP_004606423.2;XP_004619557.2;XP_054989137.1;XP_054989897.1;XP_054980440.1	29.8949	28.4884	28.0119	28.0008	28.073	28.9937	29.7279	28.9168	28.7971	28.5333	28.6671	27.7844	28.1058	28.0763	28.6076	27.6542	27.1298	28.3786	27.732	28.2394	27.6195	28.0982	27.4056	28.1157
XP_004606530.1	22.8843	22.0086	23.3218	24.0939	23.1693	23.705	22.6949	24.227	23.7564	23.7578	24.2942	24.0513	24.0126	24.0123	23.5838	24.1138	24.5493	23.6515	24.5321	24.4898	23.6208	24.4134	24.3879	25.0229
XP_054996830.1;XP_004606555.1;XP_012788046.2;XP_004612207.2	19.2759	19.8598	22.0965	21.0258	20.997	19.1416	19.6968	21.291	20.3691	20.0543	21.5249	21.3965	21.5032	18.867	21.0898	19.4081	20.9986	19.2183	22.8579	17.9963	20.5399	20.5624	21.1451	20.7771
XP_004606567.1	24.8951	24.4183	24.3772	23.9996	24.4677	25.0503	24.2976	25.0686	24.5523	24.6025	24.8837	24.6154	24.5982	24.5371	24.144	24.2382	24.3394	24.2983	24.0464	24.6465	23.8507	25.4906	24.0014	25.1886
XP_004606577.1	18.8948	18.795	19.9831	19.286	20.9895	18.6494	21.3798	19.4577	18.6028	19.7938	19.7156	20.3396	18.1747	19.8085	20.3601	18.7148	19.7279	19.507	20.2324	19.01	22.5977	19.0853	20.4933	20.1491
XP_004606612.1	20.0341	19.241	21.3609	21.4388	20.8955	19.6127	21.1111	21.802	21.678	20.6846	21.566	18.9545	20.7608	20.0893	20.0369	19.3728	19.2816	20.6677	20.4774	20.0715	19.866	20.1476	21.2477	18.8674
XP_004606733.1	23.2853	22.7579	23.407	22.7161	21.8636	24.4559	22.5134	22.0607	21.7844	21.9489	23.6301	21.8794	22.0326	21.9549	23.3329	22.9636	21.884	22.3078	22.3207	23.7719	22.7191	22.1789	22.3322	22.9877
XP_004606749.1	24.6169	23.8218	25.5409	25.5988	25.1395	24.2451	25.2942	24.638	24.2034	24.6293	25.2991	25.8041	25.747	24.7542	25.2537	25.4524	26.0825	24.7733	26.0299	26.274	26.3218	26.2775	26.171	26.5949
XP_004606750.1	24.765	24.945	24.2366	23.7695	24.0937	24.5931	24.4131	25.4321	24.8425	24.4183	25.0184	24.1919	24.3881	25.8194	24.2874	23.4173	23.21	24.3057	23.8585	22.6204	22.9181	22.9673	23.8731	24.0893
XP_004606772.1	19.9604	19.2799	21.5884	23.1279	20.6705	20.0745	20.8809	19.3131	21.2103	19.5069	20.591	22.012	21.8504	19.9722	21.2531	18.5635	21.2623	20.2468	18.6897	21.0857	21.9832	21.2046	21.5113	21.5543
XP_004606798.1	21.4738	21.8068	24.1308	23.2816	23.2588	22.022	22.4062	20.4061	22.8536	21.9158	21.7619	22.8948	22.4807	22.4327	22.4538	22.0093	23.4446	22.3251	23.4065	22.3076	23.0574	23.4885	21.9467	22.7092
XP_054982998.1;XP_004606802.1;XP_054982997.1;XP_054993047.1;XP_054982996.1	20.0328	22.4149	21.9202	21.9224	20.3182	21.9715	21.7626	23.6223	22.2599	19.9242	22.5038	21.8397	21.6734	21.7341	22.7783	21.7117	19.6651	21.5281	21.7368	21.7077	22.5725	21.6062	22.4288	21.8691
XP_004606805.2	19.1863	20.3398	20.7621	20.8529	19.0824	19.1925	20.3061	18.9144	19.3135	19.4746	20.5824	21.0819	19.884	19.9198	20.2998	19.5209	21.3843	19.0014	20.7494	20.4487	20.9603	21.1595	21.455	21.1977
XP_004606943.1;XP_004616027.2	23.3192	19.2976	22.7676	23.6101	23.4125	22.4348	23.4906	23.4546	22.848	21.9682	24.2457	23.726	23.8453	22.9743	23.5525	22.7753	23.2173	22.3956	24.0659	18.674	23.3972	22.7793	23.3012	23.2413
XP_004606970.2	24.1602	22.6477	24.4138	24.6336	23.1302	24.1441	25.0451	24.033	24.6337	24.5038	24.7381	23.6673	24.9131	22.6738	23.7723	22.9717	23.3049	22.7477	24.1762	23.842	24.1332	23.2989	24.3727	24.7606
XP_004606996.2	21.1688	18.3481	21.2582	21.127	20.6929	21.5344	21.7612	21.3204	21.4067	20.5908	21.5225	21.3474	22.4455	21.0356	21.2053	20.9828	23.7953	21.316	21.3352	21.4159	20.9875	21.0527	21.2409	21.2927
XP_004607006.2	19.5669	21.2765	22.8485	22.6243	24.0624	21.6518	21.8883	21.9327	22.0359	21.6144	22.4476	22.2867	23.2115	21.9339	22.6726	23.2108	22.2389	23.1604	22.7109	24.5736	23.2607	21.9124	22.3704	23.1966
XP_004607032.1	19.8703	20.0692	20.4356	20.1005	19.1135	19.2438	21.7497	19.5977	21.218	20.5807	19.7386	19.1674	20.2142	20.0003	20.3435	19.5971	19.5467	19.6622	18.9658	19.8431	21.2452	19.1615	20.6021	19.3172
XP_004607054.1	21.3754	18.5232	21.1828	21.17	21.0167	21.4681	21.7031	22.098	21.6218	21.0314	21.2809	20.7736	21.8942	20.0447	19.9147	19.7652	20.9585	21.0906	20.593	19.3691	21.9849	20.7215	20.1408	21.8933
XP_004607114.1;XP_054998506.1	27.8932	26.8666	28.1721	28.1917	27.6923	27.4386	27.5388	28.2059	27.5628	27.4301	28.1999	28.514	28.2682	27.8703	28.39	27.7854	28.262	28.0454	28.0539	28.0804	28.354	28.2978	28.4635	28.5668
XP_004607139.1;XP_004607140.1;XP_054983110.1	25.3554	24.4083	25.389	24.1287	23.4924	24.7348	25.2167	25.4662	24.776	24.3399	24.6382	24.3816	24.966	23.5971	24.4528	24.2023	22.5905	23.1726	23.7614	23.5907	24.1541	23.6931	24.1844	24.0979
XP_004607175.1;XP_004611369.1;XP_054974215.1	21.0871	19.5439	21.4664	18.9947	20.729	21.6244	21.3871	19.3155	22.0283	19.6339	21.407	21.4804	21.3332	21.8906	21.1893	21.2647	18.3234	21.1086	21.2737	18.1274	20.0249	18.7292	22.3077	19.4746
XP_004607176.2;XP_054995227.1	19.4294	18.9831	20.9893	22.639	22.8533	19.8243	20.4109	20.0364	19.4885	19.7871	20.3391	21.1291	20.058	20.4303	19.6737	21.9498	24.1726	20.3605	22.2994	19.4166	20.629	23.438	21.1938	23.4338
XP_004607182.2	22.5581	19.0131	20.112	20.4969	19.1939	22.8332	21.6024	22.0508	22.0887	18.7853	19.7802	22.08	21.4499	21.662	21.6267	19.9412	18.4853	22.4391	22.338	19.2851	21.2392	19.3266	19.073	21.7644
XP_004607184.1;XP_054994127.1;XP_054994128.1	24.9623	25.0968	25.031	23.9901	25.0553	24.7026	24.4689	24.6256	24.421	24.4368	24.5068	24.4156	24.6431	24.2121	25.0419	24.0351	23.6786	23.8935	24.1079	24.0595	24.0418	23.7771	24.2822	24.6107
XP_004607185.2	23.8692	21.9695	22.6313	22.1733	21.9301	23.0857	22.9771	23.1127	22.7306	21.8673	22.6906	22.9151	22.9267	22.5919	22.9389	22.4521	21.1915	22.4798	21.9479	21.8753	22.4467	21.8174	22.101	22.516
XP_054996330.1;XP_054996329.1;XP_004607357.2	19.6067	19.194	20.6901	21.7118	20.5907	20.0671	20.1629	20.8519	20.1858	20.1216	20.1397	21.3008	18.958	20.814	21.9562	22.1228	21.4666	20.435	19.1045	20.323	20.7018	21.1854	22.2644	21.7748
XP_004607403.2;XP_054974635.1;XP_054974987.1;XP_054974988.1;XP_004607405.2;XP_004607406.2;XP_004620775.2	21.0739	18.1499	23.1739	24.3974	22.5717	21.9712	22.2183	21.4107	22.95	21.9838	24.4881	24.9347	24.7233	24.3966	23.9469	23.2519	26.0336	23.6268	24.2646	21.9044	23.3224	25.6607	24.079	24.9077
XP_004607415.1	21.8611	20.7034	21.4081	18.2006	22.463	21.3176	19.3624	18.4515	19.2544	19.2764	21.6582	21.1566	20.2773	21.7064	20.9329	21.6266	22.1363	21.3305	22.6825	22.5135	20.5217	21.0935	21.4949	21.6322
XP_004607487.2;XP_054979532.1	24.6696	23.3752	25.0436	25.2708	25.4834	24.5299	24.5028	24.7252	24.1921	25.0185	25.903	26.356	25.6965	25.497	25.2582	25.8367	27.2753	26.0665	27.1822	25.0153	26.4117	26.8875	26.1435	27.0468
XP_004607492.1	23.6237	23.0957	24.2179	24.2624	23.6575	23.243	23.5722	23.3875	23.441	23.1286	23.4321	24.3761	23.9538	23.3801	23.6973	23.9441	23.0942	23.758	23.2959	24.1458	23.8701	23.6456	24.5524	24.0851
XP_004607495.1	24.0768	23.2544	25.1848	23.14	22.9837	23.6162	23.8551	23.0036	23.9895	23.2281	22.7398	23.5372	23.7525	24.1253	23.7106	23.4012	22.1153	23.1174	23.1663	22.2553	23.5088	23.2855	23.4383	23.3735
XP_004607496.1	22.1035	21.7022	19.6558	19.4389	18.1756	22.1966	23.8743	23.611	22.9001	23.9966	24.5906	24.0712	24.5235	24.0569	24.3242	23.2873	23.4928	24.2565	23.743	23.3299	23.2737	23.22	25.1025	23.3823
XP_004607497.1	26.914	26.8869	26.4862	25.7528	26.0469	26.7058	26.8921	26.8569	26.7598	26.5163	27.1169	26.9665	26.5863	27.1704	26.509	26.3345	25.3812	26.9261	26.8795	26.4332	26.0735	26.4824	26.5358	26.5598
XP_004607499.1;XP_054975082.1;XP_054975374.1;XP_012787931.2;XP_004607498.1;XP_054975373.1	19.9116	21.5225	22.7331	24.5206	23.6378	19.6441	20.6503	21.7355	20.4822	18.7252	19.5616	19.179	18.9392	21.1428	20.8164	20.4685	22.4665	20.699	20.9358	20.7283	22.2702	21.4654	22.0838	21.5395
XP_004607500.1	24.5428	25.5603	24.2049	23.5334	23.6832	24.7528	25.1383	25.1257	25.4067	25.6029	24.4517	24.1723	23.495	23.8085	23.7849	23.4618	23.3427	23.3233	23.5031	23.176	23.6922	21.5138	23.7503	23.7943
XP_004607510.2	21.6908	21.5879	21.2382	21.356	22.2596	22.3055	22.1706	23.0062	22.6809	21.9796	22.5969	22.3715	21.815	21.6498	21.8144	20.07	20.1578	20.351	20.1235	18.6323	21.35	20.7819	21.0118	20.8688
XP_004607530.1	22.3395	22.3539	22.0058	22.9701	21.8853	22.0626	22.5703	22.4175	22.5566	21.7659	22.3594	22.424	22.2785	21.139	21.2842	20.3343	20.6072	20.8095	21.6732	21.4865	21.6179	21.3256	21.982	21.7232
XP_004607542.1	22.9417	21.1697	22.7623	22.6079	22.6691	22.3799	22.5823	22.9296	23.0375	22.9528	22.0656	21.8158	22.4859	19.2191	22.2335	22.0099	21.3431	21.6763	21.5391	22.4384	22.2475	24.0138	22.0902	22.1141
XP_054975466.1;XP_004607544.2	19.7021	19.1861	20.6239	21.4574	20.5603	18.371	19.2493	19.9484	20.1706	19.8591	18.9427	21.5169	19.4118	19.2463	19.4411	20.3141	23.6494	20.9457	22.1594	20.5402	21.1761	22.1651	19.2386	20.9675
XP_004607579.1;XP_054989364.1	25.037	25.4992	25.6286	25.6888	25.1709	25.817	25.8412	26.0782	26.4772	25.5317	26.2526	25.818	25.2752	25.4808	25.0704	25.1294	26.1919	25.0343	25.6194	24.8388	24.9862	25.849	25.7319	25.6379
XP_004607625.1;XP_054975042.1	19.4502	21.2209	19.5473	20.4989	19.0378	19.2888	22.5535	22.7611	22.0629	20.2013	19.6991	19.7622	19.7824	18.067	18.9154	20.046	20.104	18.7624	18.7416	18.3794	20.2572	18.232	19.5313	19.9365
XP_004607626.1	23.7957	24.4956	24.4101	24.3369	24.6021	24.5637	24.707	24.8637	24.2903	23.901	24.6015	24.0374	24.6157	25.4351	23.8714	23.8395	25.0497	24.607	24.5588	23.4945	24.646	25.1754	24.0444	24.3484
XP_004607683.2	22.2654	21.333	22.6608	18.9639	19.3043	21.5314	21.1693	22.3293	22.4211	19.3069	21.7727	21.6662	20.3573	18.6852	20.5182	22.1664	18.7181	19.7668	20.8058	22.1487	21.4449	23.0242	18.3766	21.9345
XP_004607685.1;XP_054975353.1	25.0345	25.329	24.6441	24.4077	24.4039	25.611	25.5539	25.1852	25.5154	25.2086	25.2566	24.8934	25.0002	25.3032	24.6717	24.2127	23.4409	24.7269	24.9656	24.6395	23.7665	24.0882	25.0214	24.1942
XP_004607690.1	24.1514	23.7228	24.5826	24.9675	23.8775	24.017	24.5759	24.9012	24.6194	24.0604	25.153	24.6326	24.3477	23.9946	24.5352	24.388	24.2923	24.3939	24.8503	24.4674	24.3648	24.5732	24.5971	24.7276
XP_004607693.2	19.7195	18.3622	17.6347	19.3674	19.4022	18.8592	22.0514	20.0569	20.4403	18.8506	24.2769	19.1388	18.4679	19.1611	22.3826	20.4299	18.8839	18.0286	19.3538	18.1122	22.955	21.5676	19.6219	19.5688
XP_004607727.1	19.0773	18.9228	20.7065	19.4065	19.7835	18.8486	19.8884	20.4748	20.7308	18.4091	19.7174	20.0789	19.7035	19.6275	19.4711	19.2076	19.6157	19.1747	19.7874	19.5025	18.5259	20.5609	19.9597	19.362
XP_054981082.1;XP_004607746.1	20.4856	19.5332	18.6805	19.6088	19.2736	18.3502	20.415	20.5389	20.5319	18.8206	21.0576	22.5261	21.0569	21.8199	21.5061	19.2193	19.1589	19.9829	18.8616	20.4195	21.2185	19.2469	19.7481	18.4554
XP_004607758.1;XP_055002162.1;XP_054979880.1;XP_054986862.1;XP_004601850.1	21.936	20.5061	21.3445	22.3611	21.672	20.3195	21.0982	21.6815	21.7498	18.5359	21.6088	22.2203	21.3478	20.9897	20.7714	21.0583	21.9654	18.7105	21.6652	21.0044	21.9575	22.8864	22.414	22.149
XP_004607764.1	19.2106	19.4828	20.1799	19.5439	19.3401	20.4627	20.6697	19.3472	20.1267	19.3174	20.9967	19.9223	19.2664	20.4336	19.313	19.2265	19.9728	18.9483	19.0155	19.3362	20.743	19.2565	19.7053	19.5745
XP_004607785.2;XP_055001133.1	25.7877	23.8506	25.4253	24.7066	24.5631	24.6139	24.7745	24.7548	24.6282	24.7612	24.4655	24.9997	24.8015	24.842	24.9751	24.3946	23.924	24.3998	24.3417	23.9311	24.4564	24.2942	24.734	24.428
XP_004607883.1	23.3882	25.5466	23.9583	21.8623	24.4492	26.066	24.0239	22.6651	22.5661	23.7233	21.8256	22.953	24.6387	25.5092	22.3942	23.6384	23.1875	22.7918	21.1818	19.4252	19.5072	22.8958	21.904	22.566
XP_004607885.1	23.5026	24.2654	24.0833	25.484	22.9014	23.9101	24.7125	23.6423	23.1906	22.1651	23.7435	24.4259	24.4397	23.7848	24.0875	23.9261	23.4373	23.1864	23.6232	22.6537	23.3148	23.7166	24.6339	22.8945
XP_004607916.1;XP_054974035.1;XP_054974034.1;XP_004619884.1	20.9387	18.5445	22.0691	20.758	21.9436	22.2377	21.6727	21.4633	22.631	19.6145	21.748	20.938	20.998	18.3908	20.5006	19.0721	20.6855	19.5115	20.4841	20.4098	19.9433	20.8592	20.9017	19.2817
XP_004607947.1	27.5902	26.8558	27.4857	27.489	27.0642	26.8383	26.9715	27.1142	26.923	26.4304	26.7095	27.1321	26.9361	27.0595	26.0783	26.1781	26.3448	26.2755	26.7866	26.8598	26.5092	26.99	27.1162	26.7316
XP_004607959.2;XP_004607957.2;XP_004607956.2;XP_004607955.2	22.0767	22.8964	21.9226	22.4546	22.6736	23.1557	24.0658	23.0413	20.0586	22.1013	23.2646	22.3615	22.7666	22.4089	24.0574	21.9824	22.2365	19.7816	19.2218	21.8864	23.3328	22.343	21.6474	21.8227
XP_004607974.1;XP_004607973.1	22.4097	21.9863	24.855	19.7018	23.7613	18.9356	21.2839	19.4699	20.6016	24.9646	22.1559	22.4542	18.8619	18.7885	18.0866	21.1314	19.1337	19.2457	20.3982	19.9692	22.7635	18.6801	20.1415	21.4934
XP_004607978.1	19.5425	18.8502	21.9991	22.0129	21.6357	19.3562	18.4509	21.4962	19.559	21.3093	20.3252	19.7137	20.2424	21.2746	21.468	21.6521	21.2157	19.9513	21.4766	20.8267	20.6694	21.037	22.053	21.0368
XP_004608023.1	21.2257	18.6223	21.2897	19.3158	20.4058	19.0084	20.6539	20.0552	17.8504	20.0948	18.2955	22.3573	22.3949	19.8245	23.8386	22.7326	23.3129	22.117	22.0226	23.8558	23.6452	24.0248	22.3672	23.6681
XP_004608030.2	21.392	19.0793	19.2321	21.9799	20.9698	20.0763	21.4352	20.5852	19.3404	18.735	19.408	19.0272	19.1171	21.0007	19.0339	19.6935	20.9501	19.3396	19.142	22.1337	20.1711	22.1881	21.2262	21.1962
XP_004608046.2;XP_054994593.1;XP_004608047.2	23.6143	23.1991	23.2513	22.6126	22.2141	23.0943	24.0772	22.9703	23.5352	22.0811	22.5339	23.1629	23.9468	22.3998	23.3797	22.3176	21.9302	22.4524	22.4946	22.8941	22.9385	22.9692	23.465	23.3456
XP_004608074.1;XP_054995032.1	23.2601	23.7416	24.0391	23.8695	23.2598	23.65	23.5537	23.2123	23.6441	22.7477	23.8023	24.1813	23.7973	24.1301	23.8631	24.0354	23.8675	23.4064	23.4584	23.1566	23.9958	23.235	23.64	23.97
XP_004608161.2	23.3957	23.4756	22.7055	23.1994	22.8215	23.135	23.8074	23.1041	22.8416	22.0737	23.3697	23.3261	23.3094	23.5975	22.7539	22.7332	22.7206	23.0577	22.843	22.2017	23.0796	23.0052	20.3241	23.0047
XP_004608207.1	23.492	23.2103	23.168	22.2744	22.6533	23.0131	23.397	23.4363	22.8879	21.7048	23.6059	23.6567	23.8523	24.0115	23.6283	23.7124	22.5269	22.7723	23.2893	21.9708	23.1803	22.6175	22.8919	23.3889
XP_004608214.1	29.1092	27.7453	28.6873	27.6767	28.3213	28.278	28.2518	28.2152	28.163	28.2311	28.2685	28.1279	28.4815	28.1583	28.4999	28.2521	27.2564	28.1376	28.0403	27.7157	27.9506	28.2866	28.8866	28.3668
XP_004608216.2;XP_054979403.1	21.134	20.9654	22.3891	21.5068	22.2563	18.6839	19.5191	19.2733	20.2065	19.4733	20.3682	20.4901	19.1516	18.9314	19.5572	20.5773	21.9385	19.8645	20.9301	20.9127	21.1893	21.3365	20.8213	22.1677
XP_004608264.2	18.6474	20.2548	23.0194	23.8178	22.6155	20.4694	19.4649	21.2909	22.2559	21.9627	23.1302	22.9586	21.4626	21.9249	20.4558	22.2271	24.1047	21.6267	23.8688	22.1602	21.8845	23.5889	22.844	23.2544
XP_004608403.2;XP_004608270.1	19.6649	21.2717	20.6271	18.5394	19.9837	21.6273	22.0496	22.3127	21.5097	18.8352	19.5965	19.6053	18.2922	19.0235	22.5399	20.3118	19.5912	19.5463	19.3256	18.9115	22.2393	18.3962	22.22	20.7923
XP_004608277.1	24.8244	25.6575	24.728	24.5888	24.5115	25.6606	25.0519	25.0473	25.3498	24.7148	26.1434	23.9555	25.049	25.4388	25.1076	23.7295	25.3467	25.0302	25.8188	24.8178	24.1199	24.357	25.3923	24.1718
XP_004608289.2	22.7598	22.7391	24.3286	25.3274	24.5914	23.8161	23.3138	24.0022	24.3131	23.1995	23.6373	24.3454	23.3385	23.5852	22.0076	23.9295	23.8533	22.7038	23.6488	22.4386	21.9668	23.7441	22.7624	24.3766
XP_004608294.1	21.4211	19.5171	22.106	18.6472	20.8637	22.0985	21.6214	21.9964	21.7477	21.2287	21.6235	21.0899	21.488	20.6246	20.8714	19.0453	20.9788	20.98	21.4183	19.1598	19.1628	19.8776	21.0603	20.8047
XP_004608305.1	21.3135	21.5922	21.1845	20.1012	21.7585	20.7258	19.1796	21.0089	22.2283	23.629	18.7825	20.5133	19.9737	20.9687	20.3248	22.8937	19.2356	19.7302	19.7797	21.3337	20.4244	19.7467	21.9229	20.0103
XP_004608306.2;XP_004608307.2;XP_054977040.1	24.3479	21.7461	21.726	22.6138	21.6481	22.0739	21.0541	21.5002	19.6529	19.4965	21.5405	21.9801	19.2231	18.9446	23.0009	19.1884	19.0079	18.8758	19.0901	18.0768	20.5808	18.7027	22.7213	22.2489
XP_004608330.1	22.1062	19.6664	22.4891	22.0539	18.8512	22.7863	22.9965	22.9328	23.1869	23.1539	22.8529	22.4308	22.5029	21.624	22.8383	21.6593	20.5972	22.2453	22.0145	21.2466	21.7312	20.9933	22.6899	22.0123
XP_004608337.1	26.4831	25.2615	26.6648	25.6217	25.6936	26.0299	26.0988	26.1836	25.5716	25.1547	26.3712	25.5864	25.8158	25.026	26.0266	25.6376	24.2596	25.0953	25.1851	25.3832	25.3096	25.8041	25.5169	25.7243
XP_004608338.1	24.7921	24.4807	25.2512	24.4748	24.3275	25.1896	24.3333	24.4892	24.6579	23.685	24.6795	24.2373	24.3572	23.6941	23.8219	23.9348	23.2495	23.7148	23.3471	23.8289	19.3752	23.8638	24.2916	24.2139
XP_004608344.1	21.7333	19.6217	22.226	23.6417	24.0825	20.125	19.3494	23.0506	22.6084	20.4321	21.9758	22.762	23.3545	20.8481	21.9173	19.8623	23.8883	19.8214	22.5835	20.5563	21.9485	22.1766	25.0241	23.0679
XP_004608537.2	20.5257	19.4719	20.4208	19.094	18.489	21.2996	21.6838	21.1627	20.363	20.013	20.7374	21.5302	22.7852	20.9214	20.645	20.642	20.9652	20.7575	20.8653	21.2598	21.0713	19.1189	20.4035	21.3913
XP_004608552.1	23.4741	23.5439	23.7463	25.2442	22.854	24.236	23.3187	24.0907	24.6171	24.4057	24.0687	23.4929	23.145	23.4912	23.4382	22.451	22.0747	22.8912	23.0294	22.8806	21.5898	22.3181	23.2385	23.5045
XP_004608568.2;XP_004608569.1;XP_054997987.1	28.1289	27.1801	27.5726	27.4799	27.9489	28.0334	27.7819	27.8461	27.0601	27.7971	27.8944	27.4313	27.9659	27.238	27.8574	27.458	27.2137	27.5782	27.3958	27.0858	27.8898	26.9079	26.8107	27.6355
XP_004608613.2	23.3427	22.6316	22.1527	21.2042	22.405	22.6582	22.6775	22.8564	22.1916	22.2002	21.4751	23.1177	22.4463	23.2748	21.6534	22.4541	23.3966	23.3191	21.6468	23.5608	24.2288	22.3122	22.585	21.9173
XP_004608625.1;XP_054985986.1	20.3712	20.1325	20.9225	20.994	20.0011	18.0996	20.635	20.6959	18.5997	19.9023	21.3261	21.2862	19.9391	20.1819	19.7966	19.3016	19.3712	20.8262	20.9893	19.5599	21.7081	21.8361	20.3996	21.2946
XP_004608633.2	19.1727	20.3448	25.3226	19.87	20.3921	25.8618	25.5249	26.0651	19.8779	19.4957	17.9996	24.6564	19.5004	19.1504	20.5139	24.5327	20.9615	18.657	24.9508	18.8625	19.6515	19.6422	25.321	20.6798
XP_004608655.2;XP_054989535.1	22.4682	22.2085	22.3967	20.403	22.3758	22.3663	22.2807	22.426	23.996	23.1969	22.725	22.0627	21.9479	22.1087	22.7497	22.6894	21.837	22.2158	22.4477	21.9231	20.1813	22.1495	22.9587	21.5668
XP_004608674.1;XP_054987909.1;XP_004607528.2;XP_054975552.1	18.9492	18.1558	22.9646	24.8589	23.8099	18.5352	21.5279	21.6986	20.1108	18.0936	22.0775	23.8085	21.908	21.4148	22.1325	22.6975	24.8344	22.4021	23.5813	21.59	24.3784	23.8526	22.7249	24.1189
XP_004608700.2	23.9761	22.4237	23.438	22.5776	23.7755	23.6647	22.9579	22.9074	23.2572	23.8633	23.1117	22.5412	22.2996	22.2952	23.6613	23.5496	21.3615	22.5644	22.9897	23.0401	22.2203	23.2005	23.6334	22.4531
XP_004608727.1	21.9469	19.0841	21.2662	21.9038	18.5585	21.2741	24.8174	20.0145	22.5306	19.371	19.4802	22.7193	22.2484	19.7712	20.1111	20.7707	22.6722	19.0474	22.0943	18.966	24.1299	18.807	21.0465	21.0637
XP_054987635.1;XP_004608743.1	26.1442	25.2996	26.5499	26.3522	25.8541	25.8706	26.0405	26.0599	26.1552	25.9697	26.0607	26.2955	26.208	25.7157	26.0486	25.9059	25.5236	25.71	26.0728	26.3358	26.2441	26.4494	26.5374	26.6134
XP_004608760.1;XP_054989389.1	21.7682	19.6575	22.4448	19.5875	20.6129	23.34	21.6706	21.2483	19.6948	20.3294	21.6359	18.7991	20.0342	18.8232	18.95	19.4129	20.3926	19.5919	18.465	19.6735	20.4628	19.8287	19.708	19.5897
XP_054988309.1;XP_054988308.1;XP_054988307.1;XP_004608767.2	19.7057	19.3308	20.3717	20.2153	19.167	19.4479	18.9215	19.4937	19.8576	18.9687	21.106	20.6282	20.1597	18.798	19.025	20.0781	19.2331	19.6092	18.9027	19.5905	20.0021	19.6781	20.2478	18.8188
XP_004608769.1	21.7929	21.1741	21.6159	21.3475	22.0052	21.204	21.1017	21.3947	20.954	19.0459	20.6741	22.2564	21.4522	20.5163	21.5944	20.5547	22.0732	21.0374	21.5364	20.0425	22.1655	21.4771	21.0176	21.4444
XP_004608777.1	24.6258	24.9157	22.8455	24.7861	24.9966	24.1918	24.5115	24.4304	24.7946	24.9426	24.7715	23.6084	24.8658	24.6363	24.1268	23.8528	24.1883	24.2947	24.3361	22.5046	23.3122	24.2843	24.139	19.5469
XP_004608778.1	23.915	22.9307	23.6372	23.1568	23.0914	23.4015	23.5106	23.7604	24.0189	23.6276	24.1844	23.4089	24.036	23.1933	23.958	23.2497	23.9572	23.1863	23.1271	23.0029	24.1817	23.5322	23.7294	23.3092
XP_004608793.1	24.0846	23.9407	24.1601	23.3746	22.4573	19.5223	24.0161	23.7238	24.4839	22.9747	24.3016	23.7065	24.0809	23.5372	23.6757	23.2698	22.1817	23.1993	23.0765	19.3877	22.5477	23.6802	23.1642	23.8174
XP_004608824.1;XP_054991633.1	23.8776	23.2463	23.9817	23.3465	22.8552	23.3843	23.6017	23.4963	23.8581	23.6363	23.6208	23.5035	23.6968	24.4784	23.1522	22.9139	25.3541	24.9095	22.8357	23.3406	25.5241	23.6668	22.8138	23.2296
XP_054989516.1;XP_004608836.1	22.5423	22.4957	22.1971	22.32	21.936	22.0292	22.373	22.7175	22.4383	22.0343	22.4784	22.0936	22.2388	23.3809	22.2209	22.3443	21.8858	21.9818	22.259	21.7858	21.7523	21.3746	21.8161	22.2671
XP_004608845.2	19.544	19.5095	20.562	20.3153	19.5235	19.8096	23.295	20.8548	21.3227	19.1871	20.5753	18.3377	21.157	20.7029	19.5394	19.7097	20.8452	19.0581	21.4414	18.3465	21.579	18.9961	20.0471	20.0757
XP_004608862.1	22.6888	22.6794	22.2383	21.5786	19.8863	23.21	22.4865	22.6286	23.0824	22.94	22.0062	22.7343	21.5733	22.1803	22.1742	21.3478	21.2245	21.52	21.78	21.0232	18.6352	21.4184	22.2367	21.586
XP_004608867.1	22.1827	20.3358	22.1034	21.5007	25.7765	21.3726	21.8372	21.7827	22.3051	20.8811	21.2151	21.6237	22.2985	21.3385	21.1771	20.0305	24.9622	20.6793	20.4273	20.1377	20.8249	19.99	21.4996	21.1518
XP_004608876.1;XP_055003274.1	25.9866	26.2822	26.5428	25.5919	25.9994	26.2116	26.2636	26.6623	25.977	24.9372	26.5295	26.0447	26.7514	26.1957	25.8935	25.2959	25.56	25.7647	25.8788	25.7763	25.6744	24.9065	25.9668	25.4521
XP_004608877.1	20.1805	19.7177	19.5079	18.5448	19.1843	19.8849	19.9133	19.2158	21.1431	18.7311	19.5811	20.4347	19.9294	20.5556	17.6675	21.2035	19.9782	18.5841	19.8403	19.0403	19.6412	20.2156	20.5289	19.869
XP_004608922.2	19.6246	21.6281	19.2827	20.5413	19.3727	19.2141	21.3069	19.1852	20.6596	19.2624	22.1499	20.4194	21.914	20.1765	20.1217	18.8319	20.7665	20.6087	20.4009	18.709	19.1797	18.1071	21.7005	18.5337
XP_004608972.2	21.7627	20.8907	21.7637	20.8421	20.1688	21.4892	20.939	21.0222	21.7035	22.3204	22.4243	22.0232	20.5309	21.2111	23.6068	22.7749	21.1963	22.4831	22.6543	22.3098	21.4232	21.1523	22.8763	21.2239
XP_004609013.2	19.0485	24.0184	19.2581	20.7305	19.3797	19.0934	19.8834	18.8123	19.641	25.3424	19.4219	19.7492	18.3308	20.3371	22.7935	21.2637	20.5802	24.5612	18.9284	20.1099	23.3776	19.6275	22.7675	22.4054
XP_004609026.2	18.7815	18.4604	20.7923	18.576	19.0276	20.2608	20.1297	18.9876	19.1322	18.6827	19.8958	20.0398	19.7561	18.9106	19.2076	20.675	22.2836	19.4861	19.2896	21.9626	20.709	20.3706	19.9838	18.1563
XP_004609072.1	24.8462	24.1439	26.1537	25.3889	25.8238	24.8739	25.4771	25.6521	25.6718	24.9876	26.4705	25.5496	25.9683	25.175	25.8224	25.721	25.6968	26.0679	26.3646	25.8835	26.1836	25.9162	26.3858	26.2953
XP_004609095.1	29.1807	28.5303	29.3513	29.313	29.1357	29.1511	29.3872	29.3915	29.096	28.9412	29.0211	29.4402	29.5371	28.8057	28.6938	29.3086	28.8566	28.912	29.3562	29.1654	29.0677	29.4484	29.1531	29.3667
XP_004609098.1	19.7539	20.4624	20.3573	20.2814	20.1229	20.4274	21.9469	20.4871	19.0288	19.0216	22.4756	21.0046	20.7428	18.3124	20.1294	19.0434	18.8625	19.3851	19.6744	18.8248	19.5865	19.1529	19.7107	19.1578
XP_004609149.1	18.5845	20.7703	19.0136	18.7515	20.5566	19.1892	22.5233	21.8538	21.0815	18.5172	19.8338	19.0275	19.1475	19.1196	22.7831	21.0987	19.4485	20.1699	18.9689	18.5197	23.1404	18.8179	20.0009	19.5346
XP_004609163.1	20.64	17.9149	21.7658	22.8804	21.5397	20.2043	20.8241	20.3263	19.8659	19.2312	21.273	22.2963	21.3389	19.4628	19.0486	20.2588	22.4866	20.5498	21.5996	21.0718	22.1547	21.735	22.3093	22.3287
XP_004609172.1	22.2949	21.8921	22.4336	21.7995	23.0675	22.4706	22.4078	22.6325	22.5703	22.6243	23.0391	22.9768	22.5601	23.3361	23.2919	22.745	22.8815	22.8612	22.9584	21.7421	22.4538	22.1329	22.3487	22.9777
XP_004609196.1;XP_054996849.1;XP_054977052.1	27.3706	26.6883	27.1309	26.4461	26.4453	27.1323	27.0041	27.0675	27.0157	26.7264	26.1765	26.395	26.7367	26.1423	27.0227	25.8782	25.9559	26.0707	26.4686	25.4698	25.7807	26.1666	26.0538	26.7738
XP_054976948.1;XP_004609197.1	22.2484	18.684	22.4433	21.4332	21.249	21.9679	21.5447	21.4423	21.6922	24.4618	21.3204	23.5658	21.4256	23.481	21.9412	21.4482	21.552	20.3667	21.4911	20.6677	21.8008	22.0036	20.9336	21.9993
XP_004609202.1;XP_054985266.1;XP_054985277.1;XP_054985284.1;XP_054985283.1;XP_054985282.1;XP_054985281.1;XP_054985280.1;XP_054985276.1;XP_054985279.1;XP_054985275.1;XP_054985287.1;XP_054985274.1;XP_054985273.1;XP_054985272.1;XP_054985271.1;XP_054985270.1;XP_054985269.1;XP_054985268.1;XP_054985267.1;XP_054985285.1;XP_054985278.1;XP_054985301.1;XP_054985289.1;XP_054985290.1;XP_054985292.1;XP_054985…	23.0075	22.5378	23.1552	22.9937	23.3206	22.6102	23.2805	23.6349	23.3918	22.723	23.3192	23.3472	23.4697	23.1989	23.1069	22.945	22.6453	22.3942	22.9888	22.7451	23.433	22.8259	24.0911	23.1355
XP_054977913.1;XP_004609208.1	22.4762	22.09	24.8548	23.8486	24.0324	23.7999	25.4075	23.1796	24.4502	24.9102	26.8658	25.5515	24.6286	25.5593	27.2518	24.2019	24.1933	24.8896	24.0266	24.8612	25.6294	23.8262	26.964	23.7625
XP_004609244.1	27.0712	26.0999	26.8435	27.4522	26.5024	26.2271	26.2226	26.982	25.9209	26.242	27.294	27.0942	27.0311	26.496	26.476	26.4197	27.4507	26.5843	27.0502	26.0042	27.0037	27.0358	27.0565	27.6068
XP_004609276.1;XP_054975757.1;XP_054976095.1	27.5418	26.7871	26.3535	26.8772	26.2081	27.3424	27.6514	27.7532	27.6356	26.9864	27.5712	26.766	26.9087	27.302	26.8116	26.5816	26.5955	27.7068	27.1237	26.5525	25.8385	26.2474	25.8552	26.4171
XP_004609381.2	20.2001	18.9056	21.9037	20.5254	20.5843	20.8274	20.2188	21.2518	21.9764	20.3534	20.1011	18.6169	20.6452	19.9716	19.1708	20.2039	18.9453	20.4663	18.9395	20.1922	17.9398	20.6489	18.7913	20.5544
XP_054977482.1;XP_054977481.1;XP_054977480.1;XP_054977479.1;XP_004609425.2	19.6639	18.7711	19.8857	20.2705	19.9064	19.7727	20.7698	19.7889	19.4799	19.4127	20.3407	19.2564	19.8592	20.1571	20.4439	19.9068	20.1009	18.6338	18.5411	18.9533	21.7747	19.5849	20.0462	20.2999
XP_004609498.1;XP_054988832.1	23.7445	22.6777	24.2559	22.1097	22.4896	23.5148	23.3464	23.2344	24.0031	23.0159	24.1108	23.3469	23.3729	22.2452	23.5462	22.9505	22.0533	22.2285	22.6304	22.6426	22.6605	22.3464	22.9951	23.6662
XP_004609505.1	21.6235	18.9801	20.3075	19.8302	19.7123	22.499	20.5085	21.9522	21.1007	20.5141	21.0077	21.5356	21.7139	18.8109	21.2653	21.1261	21.248	20.9106	20.6729	21.8916	21.7817	22.6152	20.6378	21.686
XP_004609507.1	25.0659	25.1398	25.2656	24.6956	24.9984	24.6406	24.9545	25.0577	24.896	23.8557	24.5474	24.3221	24.6874	24.4369	24.3228	24.1437	23.9942	23.695	23.5534	24.0595	24.374	23.8994	24.3745	24.2141
XP_004609514.1;XP_054986876.1;XP_012788438.1;XP_054988690.1;XP_054988596.1;XP_054989963.1;XP_054989962.1;XP_054989961.1;XP_054989959.1;XP_054989958.1;XP_012788404.1	24.5512	24.3386	24.6944	24.3678	24.563	24.4919	24.0486	25.0836	24.1304	24.1194	24.0629	24.5556	24.4118	23.9684	24.701	24.6363	24.9982	22.2712	24.7237	24.5881	24.5165	24.7218	25.0423	24.6234
XP_004609524.2;XP_054989563.1	18.6872	19.1492	21.9765	20.5201	20.8652	21.0081	21.1019	20.0337	21.7934	21.5026	19.1579	20.7444	19.7568	19.3045	18.8202	19.0139	18.487	19.5235	19.6291	18.7409	19.0611	19.4216	19.6028	20.3694
XP_004609529.1	22.1908	18.4125	23.2647	23.5738	23.4727	18.9226	22.114	21.6347	22.8821	22.6087	18.2516	22.7675	21.8476	21.5961	21.9308	22.7776	23.5305	22.4107	22.9252	22.4579	22.1476	22.5859	23.1096	22.807
XP_004609544.1	19.3333	20.8251	21.2964	20.0193	20.4689	20.7787	20.8231	21.2003	21.002	18.4792	21.3249	20.6504	21.1378	21.3194	20.4468	20.6852	20.4143	21.3038	20.1689	20.5157	20.6637	20.7492	21.7059	21.1788
XP_054987046.1;XP_004609573.1	23.4147	21.2777	23.6491	22.3032	22.5574	22.8498	22.5025	22.2835	22.4289	22.8006	22.5171	22.4934	22.6349	21.8153	22.0209	21.3614	20.6692	22.134	22.1677	21.6618	21.9304	21.3008	20.955	20.5296
XP_004609620.1	22.6648	23.2334	23.2991	22.5301	22.7616	23.0514	23.3738	23.9833	23.2977	22.8853	23.7847	22.7983	23.8396	22.5718	23.4659	21.0685	23.3878	21.7554	22.5433	22.0203	21.4632	21.9985	22.5126	21.8545
XP_004609624.1	23.3711	23.5374	23.8308	23.9597	23.2707	23.351	22.8783	23.8465	22.6944	22.1147	23.3758	23.7874	22.9552	23.8205	23.0882	22.8583	23.5783	22.5833	23.3445	22.9976	23.6841	23.9297	24.1251	23.6364
XP_004609630.1	22.476	22.8321	22.0317	21.6893	22.5578	21.9943	21.8193	22.9581	22.0528	22.6126	22.7071	22.812	21.8626	22.3593	22.8117	23.8715	22.5327	23.2807	23.8908	23.2373	22.3292	22.5784	22.7952	23.0257
XP_004609641.1	23.8953	23.9097	25.0757	24.0017	23.8018	24.2936	23.6915	24.248	24.2982	24.1135	24.7904	24.2051	24.5774	24.0358	24.4937	24.1035	24.2256	23.7292	23.8147	22.8205	23.0409	22.7194	24.8147	23.6322
XP_004609655.1	23.5449	23.1885	23.2744	23.2285	23.0429	23.5028	23.8023	23.7079	23.6917	23.216	23.4604	23.1382	23.0399	22.5985	23.0639	22.6511	22.6074	23.211	23.0474	22.8126	23.1486	22.8844	22.4816	23.1377
XP_004609660.1	19.0112	22.8102	23.3898	24.8871	23.9052	26.6258	21.2226	22.9598	19.7121	26.5174	23.1766	24.2497	24.429	19.4801	19.1293	19.5452	24.3663	18.8896	20.031	19.7065	24.0223	25.2233	23.9889	22.6961
XP_004609672.2	25.7271	25.2771	25.9119	25.6182	25.5164	25.0342	25.1853	25.8181	25.4167	24.684	25.5498	25.3544	25.8289	24.9855	25.551	24.6586	24.7333	24.7622	24.9045	24.8761	25.2396	25.2152	25.9945	25.662
XP_004609676.1	22.5979	21.587	22.6335	21.1656	21.8245	23.3464	23.1506	22.8858	22.8876	21.5433	22.348	22.9872	21.1793	23.4102	22.3926	21.9999	21.7848	21.2091	22.2009	22.4413	22.8988	22.3137	20.9818	22.5622
XP_004609683.1	23.6332	23.0837	24.3021	23.7549	22.8835	23.1366	24.1609	23.9202	24.2968	22.6717	23.6806	23.1328	23.8555	23.268	23.2491	22.7749	21.9048	23.376	23.1883	23.3558	23.1846	23.3141	23.8086	22.7386
XP_004609696.1	21.5397	17.8567	20.5579	20.2452	19.0143	20.3383	22.2136	21.3304	21.0047	20.142	21.3777	19.8514	20.8134	19.4782	21.2706	20.9785	20.7153	18.9949	21.1373	19.4221	21.7394	19.8528	20.3955	21.5975
XP_004609729.2	21.4667	17.9868	21.1799	19.8515	19.4058	20.7238	21.1505	22.2833	20.8164	20.6829	21.1253	19.722	18.4541	20.8674	20.9812	21.1048	20.9574	19.7	19.6535	19.1295	18.5998	19.7067	21.3421	21.2671
XP_004609830.2	21.5108	19.501	21.9896	21.1389	20.7938	18.4613	21.3138	21.7279	20.3841	20.0692	20.704	19.0927	19.5152	18.9893	21.4065	21.3634	21.7681	19.501	21.6648	21.3804	21.4362	21.0136	21.0039	22.1327
XP_004609852.2	26.3706	25.22	26.4028	26.1095	25.6832	26.5309	26.4034	26.2206	26.0865	25.8404	25.7021	25.247	25.1961	25.0601	25.1852	25.6123	24.5735	24.4924	24.734	24.4709	25.2405	25.6024	26.1355	24.9436
XP_004609855.1;XP_054988477.1	24.345	23.7574	26.0208	26.1784	25.5088	25.7185	25.8825	25.9193	26.1079	26.248	26.151	26.3948	26.7223	25.8784	24.9563	25.7259	24.092	25.2043	26.6081	25.2783	24.8804	24.8614	25.947	25.2533
XP_004609862.2	25.0254	24.8764	25.6157	26.2901	25.7969	24.4596	24.6425	25.6117	24.8968	24.8688	25.3376	25.8565	25.5194	25.4544	25.4068	25.6097	25.6702	25.1127	26.0981	25.4691	25.8134	26.3219	25.5122	25.8705
XP_004609869.1;XP_004615343.1	21.4616	21.6395	22.3092	21.6761	22.1222	21.2119	20.5367	22.2173	22.1237	20.2343	21.7496	21.315	21.7653	22.1234	21.62	21.3199	22.7787	20.8858	21.1228	22.1793	22.7192	22.196	23.1134	22.2258
XP_004609877.3	26.0872	25.2461	26.3838	25.9737	25.807	25.8431	25.3583	25.7427	25.213	25.6013	26.0918	26.3564	26.1755	26.1168	26.1734	26.1758	26.1986	25.7135	26.5414	26.2769	26.1322	25.6772	26.2458	26.1502
XP_004609879.1;XP_054999964.1	26.118	25.5576	26.4054	25.6661	25.7172	24.905	25.4067	25.3985	25.6738	25.3157	25.603	24.9007	25.912	25.0449	24.8701	24.2426	24.3266	24.0862	24.442	23.8201	24.6937	23.8722	24.6405	24.5207
XP_004609917.1;XP_054997921.1	21.4653	21.703	23.343	23.7611	23.1977	21.8836	22.2632	23.1754	22.4392	21.9776	22.1155	22.2334	22.5042	21.4966	22.8248	22.2204	22.8908	22.0853	22.6889	22.9737	22.9923	23.0312	22.6475	23.529
XP_054998674.1;XP_004609920.1;XP_054981288.1;XP_054981289.1;XP_054986584.1;XP_054986583.1;XP_054974648.1	27.16	26.4401	26.1359	25.5117	25.8287	26.052	27.0016	26.8428	26.5562	26.4586	27.4508	26.9032	27.1455	27.085	27.0158	26.7358	26.4553	26.5154	27.0488	26.5574	26.2761	26.6209	26.9176	27.0609
XP_004609922.1;XP_054998440.1	22.5447	22.4686	22.9292	22.388	21.7993	21.6195	22.649	22.7272	22.441	22.5249	22.6438	22.199	23.0562	21.8125	23.038	22.2858	21.4275	21.6481	22.5163	22.4964	22.9756	21.9149	22.3791	22.8672
XP_054999508.1;XP_054999505.1;XP_054982453.1;XP_004609923.1	20.875	21.0606	21.7807	20.5929	20.1407	19.321	22.7658	21.5726	20.9427	21.3472	19.9196	19.9821	20.9821	20.8755	20.2087	22.1546	20.8585	22.7611	22.2546	22.1892	21.7465	21.8889	22.2671	20.2259
XP_004609926.1	22.0623	22.3059	23.4942	22.4336	22.0638	22.4284	22.905	22.9772	22.9875	22.5968	23.284	23.1444	22.6996	22.6036	22.9061	23.0756	22.3571	22.1906	22.9586	21.9489	22.7574	22.2408	23.318	22.7727
XP_004609938.2	19.924	18.3129	19.7003	18.6801	20.1575	19.5329	23.4522	19.373	20.673	20.9661	20.435	20.784	19.1731	20.9735	18.4526	19.5635	19.5546	18.8723	19.1379	20.7784	23.0968	19.6611	18.2671	19.8572
XP_004609968.1;XP_004609967.1;XP_054997224.1;XP_054997223.1;XP_004609969.1	22.1803	21.5961	21.9891	21.1686	20.023	21.8511	23.0912	22.8123	22.8662	20.893	21.9323	23.9444	23.6974	22.8625	21.0934	19.1091	18.429	19.8711	21.3859	21.4201	21.0542	19.1465	20.0975	21.522
XP_004609970.1	21.7777	18.579	19.224	19.3157	19.083	19.1253	22.0084	21.5027	21.4089	21.8541	22.131	18.2474	19.9262	21.2915	21.564	17.6317	20.1386	19.2313	19.6011	21.0148	19.6067	18.9633	19.6699	18.7168
XP_054998402.1;XP_004609982.1	22.4694	22.5193	22.1655	20.6873	22.3187	22.3453	22.5661	21.0073	22.2884	22.9223	21.7455	21.7128	22.1446	21.096	21.5714	21.1943	20.9086	21.2563	20.8218	19.5903	20.8875	20.1689	19.5775	21.5762
XP_004609989.1	23.2126	22.7531	22.9992	23.0635	22.821	23.1791	23.3585	23.5345	23.6661	23.5775	23.4663	22.6888	23.2114	23.0364	22.2896	22.5158	22.8121	22.9157	22.8434	22.6015	22.0692	22.6718	22.7449	23.2005
XP_054999320.1;XP_004610025.2	22.3158	23.5932	21.6725	23.0007	23.0868	22.5841	22.671	23.0564	22.9041	22.3469	23.563	22.7675	21.9627	23.266	22.4183	23.4733	24.1204	22.3794	24.0065	22.4367	22.8299	22.9111	23.129	23.1665
XP_004610046.2	24.7261	24.5045	24.5395	24.9455	24.9777	25.9232	26.1057	26.6869	25.9743	24.6521	25.5734	25.6123	26.0492	26.439	25.2732	24.4514	25.5157	25.4221	25.6504	23.4302	24.4816	24.7999	25.3517	24.7616
XP_004610104.1;XP_054987220.1	22.1004	21.6994	20.8516	20.8197	19.8138	22.097	21.7314	21.7716	21.9646	19.075	21.9066	21.8546	22.0747	22.6619	22.6748	22.5288	21.73	20.9852	22.4905	21.4077	22.6313	23.3006	21.7729	21.8253
XP_004610274.1	23.4506	23.7845	24.5384	24.0804	23.9086	21.5719	22.7667	24.3197	23.822	24.0403	24.8077	24.2997	24.5156	24.5993	24.0719	23.7639	25.0441	24.6635	23.9356	24.1242	23.5884	24.6202	23.6974	24.0977
XP_012787591.2;XP_004610300.2	24.6893	25.059	24.5192	23.7981	23.5226	24.8662	25.0862	25.2143	24.8424	24.6731	24.6122	24.3194	24.033	24.8354	24.8861	23.5713	23.6333	24.3356	24.0109	23.6099	23.3609	23.7614	24.8875	23.5805
XP_055001860.1;XP_054978571.1;XP_004610314.1;XP_054980248.1;XP_004605359.1;XP_054996015.1	29.2231	28.163	29.445	28.0775	28.4052	28.6959	29.13	28.3674	29.0049	28.3887	29.1181	28.8322	28.5953	27.8244	29.2271	28.9913	27.7697	28.3003	28.4132	27.5283	28.5761	28.4878	28.8913	28.7625
XP_004610392.1;XP_054990398.1;XP_054990390.1	24.2626	24.2083	24.9769	23.8853	24.1185	24.1918	24.1402	23.967	24.0007	25.1041	24.9171	24.6718	24.6894	23.9631	25.5516	25.4384	24.1169	24.196	24.2968	25.5126	24.5243	24.0636	25.0471	24.7223
XP_004610403.2;XP_054979784.1;XP_054979753.1;XP_054979754.1;XP_054979755.1;XP_054979756.1;XP_054979757.1;XP_054979758.1;XP_054979759.1;XP_004610398.2;XP_054979761.1;XP_054979762.1;XP_054979764.1;XP_054979765.1;XP_054979767.1;XP_054979766.1;XP_054979768.1;XP_054979769.1;XP_054979782.1;XP_004610401.2;XP_054979780.1;XP_054979783.1;XP_054979779.1;XP_054979778.1;XP_054979777.1;XP_054979760.1;XP_054979…	21.939	21.2752	21.6648	20.0371	21.1628	21.7004	22.3586	21.8371	21.8003	18.2809	21.7193	21.2457	22.2128	20.1065	20.7108	19.9677	20.0392	17.8344	21.2745	21.9871	19.7641	20.2717	20.7322	18.5903
XP_004610414.1;XP_055000793.1	20.1575	18.34	20.4882	19.9515	19.049	18.6399	17.843	20.3898	19.4671	20.1712	20.8487	20.5662	20.4312	19.0142	18.6246	20.2167	21.918	20.0269	20.698	20.7579	21.1206	20.3279	19.5995	20.9635
XP_054992148.1;XP_012788614.1;XP_004610416.1	20.6078	18.5428	24.1806	24.6871	24.0943	20.8054	19.6266	22.9316	21.5375	21.704	23.1933	24.6749	22.8313	22.9317	22.8185	24.1408	25.7564	23.7715	25.6932	23.6478	24.6858	25.1502	25.3196	25.4327
XP_004610439.1;XP_054979647.1	19.7313	18.5768	20.5198	22.0981	21.7167	20.1064	19.5935	20.053	19.6817	20.8235	21.611	21.7208	20.5657	21.4361	20.9257	19.7922	23.4238	21.3034	22.9594	19.718	22.265	22.7159	21.4211	22.7322
XP_004610502.2	20.6054	18.4359	20.9206	22.6759	22.3086	19.3832	19.3246	21.1459	19.3214	17.7431	21.2259	21.7395	19.8343	21.3604	20.3444	21.3261	23.5567	20.9959	22.2071	21.0985	21.9839	22.3051	20.5971	22.6212
XP_004610510.1	30.0444	29.9719	29.3505	28.9946	28.6018	29.1565	30.1787	29.7019	29.6343	28.8116	29.1008	28.7616	28.6397	28.4785	28.5013	28.9062	28.5252	28.939	28.7114	29.4058	29.1309	29.1989	28.0841	29.5371
XP_004610535.1;XP_054998538.1;XP_054984101.1	25.8731	25.5286	25.3174	25.0293	25.2694	25.5075	26.2751	25.9228	26.2379	25.6196	25.4009	25.8268	25.1366	25.0782	25.6776	25.6231	25.1349	25.4987	25.6434	25.2232	25.1857	25.055	25.7662	25.318
XP_004610542.1	22.9071	22.6986	22.3753	21.8872	22.0656	22.5866	22.3569	23.3745	23.2113	22.4646	22.6675	21.5569	22.4763	22.0046	21.6245	21.2005	21.3247	21.9882	21.8796	22.2221	21.1673	21.4252	22.5609	21.3063
XP_004610546.1	19.9657	20.4439	19.0881	19.9989	18.0326	21.0975	25.1346	21.0982	21.1797	21.6544	21.2561	17.2613	20.9343	18.4782	22.5413	18.4572	20.2666	20.6773	20.3335	18.139	19.4832	17.7179	19.324	18.7104
XP_004610575.2;XP_004604247.2	24.7217	24.2907	25.5142	24.7176	25.0533	24.4548	25.8466	25.5646	24.4143	23.5002	24.7113	25.1311	25.7332	24.8244	24.7979	24.5563	24.8779	25.258	25.0005	24.3111	25.2873	24.8434	24.495	25.0743
XP_004610588.1	22.3842	22.2898	22.5963	22.4081	22.1025	21.3762	22.4234	22.5541	22.4099	19.9444	21.6394	21.5279	22.0746	21.5575	21.2872	20.1887	19.5362	21.6805	21.9476	22.1885	21.9924	21.0485	21.9624	21.7345
XP_054999165.1;XP_004610598.1	24.027	22.8298	24.9714	26.5379	25.6981	23.6395	23.6718	24.0168	23.5787	24.1962	25.1564	25.3851	24.5347	24.5246	24.4857	25.0629	26.7391	24.8096	26.0968	24.5917	25.3867	26.4092	24.899	26.4283
XP_004610606.1	18.7558	21.4927	18.9645	19.9835	19.8328	19.3156	18.4124	22.4489	21.7014	21.6764	21.6804	20.5567	20.4622	21.724	21.636	20.1025	21.2593	19.488	21.601	18.0942	19.3925	21.6607	21.2175	21.5982
XP_004610607.2	19.2882	18.837	20.0807	19.6225	22.0712	20.3286	19.8157	19.862	19.9688	19.2948	22.5574	19.2522	20.4504	19.6555	20.7561	21.0499	24.1135	22.2842	21.6196	18.3594	21.6209	22.1795	21.197	21.5455
XP_004610615.1	21.6445	18.1258	23.0271	24.1526	21.7038	21.757	22.9934	22.5121	22.7447	22.7202	21.1195	22.0622	22.7126	21.7104	21.686	22.1074	21.239	21.2536	21.6766	21.3982	21.9112	21.601	23.0509	21.6668
XP_004610631.1;XP_054998088.1	19.2574	18.7142	19.4557	21.1922	19.6371	18.5472	20.0568	19.4015	20.0055	18.386	19.3125	20.4933	21.472	20.4265	18.9606	19.2665	21.7273	20.6647	18.9802	21.5	20.5285	19.9805	19.0094	20.4146
XP_004610718.2	22.7576	21.9125	24.4174	21.8739	22.1468	21.3723	22.0253	22.4833	22.1902	22.9213	23.8037	22.5258	22.306	22.1399	22.8709	22.7567	21.7645	22.2501	22.4955	22.8245	22.4346	22.2194	23.4065	22.7885
XP_004610737.1	24.2326	22.9508	23.8776	22.2679	22.2857	24.0511	24.1953	24.0048	24.2015	23.6974	24.4498	25.9261	24.7689	23.3184	23.6949	23.0177	20.1395	19.5571	23.5941	23.3111	23.5014	24.0943	22.9409	24.1545
XP_054997154.1;XP_004610753.2	22.9292	19.507	22.3298	22.3233	22.3206	21.9974	26.2304	22.3505	23.611	19.4302	23.9432	24.532	24.1348	21.5876	22.7848	20.2167	21.3327	21.7604	21.6638	21.1954	24.5272	20.5064	22.8587	21.6327
XP_004610784.1	20.0296	21.3568	20.7954	20.8529	18.6355	22.0363	19.9822	21.0897	21.1474	19.4692	21.581	19.8238	19.0018	20.342	19.7987	18.7773	19.6934	20.6347	18.7688	20.7333	20.0188	20.1588	21.7955	21.0261
XP_004610788.1	21.643	19.9705	21.1487	20.6123	19.2771	20.1021	19.3883	18.6932	19.4616	21.1923	21.3696	20.6428	20.1477	17.9595	20.1973	22.1579	21.2257	19.7345	20.8718	22.566	22.1462	19.2815	20.5495	19.9124
XP_004610790.2	21.8193	19.9179	24.618	25.0109	24.5563	20.9226	22.4798	22.9181	22.8771	18.9779	23.7378	24.2049	22.7442	23.2631	24.0499	23.3881	25.6248	23.5862	24.0579	23.6224	23.7293	23.5309	23.444	24.5362
XP_054999394.1;XP_004610822.1	23.378	22.6303	24.046	22.9888	22.4876	22.4257	22.5559	22.286	22.0868	22.1415	22.9886	22.001	23.02	22.1544	22.7653	24.0469	22.2744	23.3453	22.5732	23.4946	22.7033	23.8935	22.5186	23.5042
XP_004610837.1;XP_054998560.1	23.9101	24.1241	24.8335	24.4573	23.2915	23.9017	23.7167	24.0239	23.9732	23.9306	24.2404	24.7411	24.2094	24.2832	24.3764	23.9489	24.2508	23.3164	24.4867	23.8618	24.4707	23.5434	24.5284	24.4748
XP_004610884.1	22.0363	19.2262	21.8657	21.9028	19.6093	20.4486	21.4888	20.8013	21.5638	18.8992	20.5958	18.6549	18.0926	18.3123	21.1313	21.062	20.3486	20.1005	20.5186	20.092	22.0394	20.1474	20.671	22.0504
XP_004610991.1	25.0717	24.1181	24.5922	24.3171	24.1869	23.7126	24.8839	24.4744	24.4684	23.5024	25.1131	24.73	24.9131	24.1446	24.3587	24.5243	24.4653	24.6977	25.4258	24.8042	25.2855	25.2081	24.8249	25.7475
XP_004611010.2	23.8576	23.1994	23.3074	22.268	23.6518	23.9122	24.4011	24.8692	23.8881	23.0911	24.2753	22.6872	23.3287	24.3301	23.8718	23.4782	22.5404	23.1632	23.2216	23.3529	22.5381	22.6341	23.807	22.9274
XP_004611071.1	21.8759	21.822	24.3369	22.9971	23.4073	22.8271	21.0664	21.8703	22.822	24.1942	23.7185	23.3391	23.583	24.1496	23.1623	23.8392	22.2554	23.4203	24.3727	23.3901	23.6229	23.1821	24.6957	23.3097
XP_004611094.2	22.6978	22.1723	23.2631	22.3764	22.7796	23.0627	23.1009	23.053	23.194	21.8499	22.8264	22.3705	22.8781	22.3878	20.7051	23.2549	19.7653	22.5941	22.636	22.9563	22.1636	22.8902	23.6309	21.7667
XP_004611096.2	27.1385	27.0165	28.1579	28.1086	27.9154	27.5399	27.5911	28.1261	27.6249	27.7024	28.0445	27.8697	28.0051	27.5368	27.9449	27.9961	28.3813	28.1512	28.4464	28.1452	27.8653	27.9498	28.2785	28.6842
XP_004611109.1	21.9334	21.343	21.8275	21.7162	21.6708	21.3999	22.2181	19.1572	21.556	21.8365	21.542	19.2349	21.7978	21.4942	21.9044	21.7619	21.8011	19.3227	21.851	21.4928	21.8417	21.4421	22.2027	20.7869
XP_004611117.1	26.1008	25.8196	26.7506	25.9821	25.7299	26.2339	26.5554	26.9917	26.4345	25.7685	26.5652	26.756	27.3476	26.7493	26.1872	25.4518	25.2786	25.945	25.9106	25.5298	26.0239	25.3154	26.251	25.6723
XP_004611126.1	26.0479	25.3749	24.8398	24.6378	24.9617	26.0813	26.228	24.9646	25.2651	24.9188	25.5198	24.1684	25.2385	23.8693	25.6978	24.7456	24.3732	24.2998	23.9874	24.0435	25.3304	24.8553	24.3611	25.2459
XP_004611131.1	23.4638	23.5057	23.8537	24.3782	24.3312	22.9355	23.4209	24.3497	23.9901	23.1149	24.0629	23.7777	24.4166	23.6659	23.5901	23.1696	24.1898	23.9345	23.9358	22.7407	24.2313	24.6462	24.6162	23.6851
XP_004611135.1	24.9727	26.3988	23.6371	23.6009	24.0574	25.2604	25.2188	25.7662	23.8181	24.2493	26.0058	25.2526	24.5931	24.6395	24.8423	24.4873	25.2221	26.5556	25.6272	24.4317	24.65	25.055	25.2087	24.8421
XP_004611143.1;XP_055002865.1	19.2652	19.0243	22.4865	21.0137	20.9564	18.1961	18.9484	20.6669	20.7503	18.6799	19.0646	20.7266	20.8088	19.2841	19.9667	19.6605	20.4304	18.641	20.7921	19.4356	20.3944	20.7012	21.5906	21.2721
XP_004611255.2	25.6372	24.9856	25.7815	26.3146	26.1574	25.5401	25.6302	26.1581	25.3492	25.7198	25.8458	26.2981	26.0345	25.7533	25.9621	25.6406	27.5309	26.1959	26.5454	25.5447	25.8966	26.8704	26.0551	26.9218
XP_004611341.2	18.7756	17.8514	18.4159	21.1493	19.453	19.487	20.1182	20.1887	20.2355	21.4323	19.795	21.5596	19.2812	19.0472	19.0894	20.9859	21.925	20.0697	21.8473	19.5728	19.6424	21.6096	20.9671	20.1734
XP_054984894.1;XP_054984893.1;XP_004611358.1;XP_054984892.1;XP_054984891.1;XP_054984890.1;XP_054984889.1;XP_054983249.1;XP_054983248.1;XP_054983247.1;XP_004622000.1;XP_004621997.1;XP_004621952.1;XP_004621950.1;XP_004611557.1;XP_004614004.2	30.5489	29.5205	30.515	29.6527	30.023	30.6699	30.1044	30.4727	29.9181	30.0902	30.4485	29.9607	30.566	30.4694	29.6696	29.2871	30.5499	29.9434	30.2265	28.963	29.8835	28.5075	28.6977	29.2268
XP_004611359.1;XP_054974200.1	20.8194	18.9951	19.7908	20.0631	19.4684	19.4199	20.6369	21.6329	20.6342	19.8786	21.0825	21.1487	18.8332	19.016	21.096	19.389	20.1058	20.4055	20.9955	20.87	19.6839	21.0428	22.2571	19.2232
XP_004611430.2	22.7821	21.8844	22.4028	22.1509	21.7028	22.2996	22.4283	22.5623	22.9341	21.5811	23.0685	23.0786	22.456	21.5694	24.4419	22.1892	21.5889	21.7513	22.4641	22.0559	21.4131	21.974	23.3711	22.1873
XP_004611498.2	23.0345	22.0815	22.4772	22.5794	21.8646	22.4245	21.9646	22.0809	21.7337	21.5362	21.7039	22.024	22.7644	21.7073	22.4783	22.0776	20.8657	22.2915	22.2402	21.4298	21.426	22.0955	21.5176	21.7198
XP_054985330.1;XP_054983927.1;XP_004611563.1;XP_054989014.1;XP_054989012.1;XP_004618078.1;XP_054994792.1;XP_012787095.1;XP_004608346.1;XP_054995387.1;XP_054986467.1	23.538	23.4643	24.1713	23.9583	25.156	23.8285	24.0673	24.1091	24.0955	23.4851	24.231	24.6869	24.0899	23.8668	23.6596	23.7101	23.8297	23.0031	24.1124	23.4892	23.9135	23.7969	23.9538	24.3477
XP_004611645.2	23.8072	23.5035	23.8382	21.5534	23.5423	24.5961	24.0947	23.0907	23.6064	24.6831	23.0533	23.5679	23.4711	23.4737	24.4108	25.524	23.3889	23.7082	23.2163	23.3802	23.9835	23.4325	23.7583	23.6123
XP_004611682.1	20.7137	19.2114	21.0058	20.2325	20.1474	20.17	18.7174	20.5259	21.2019	21.0674	20.8663	20.7863	20.7783	20.8604	20.6574	20.6723	19.8235	20.7539	19.5193	19.719	19.1643	19.5436	21.0759	19.4716
XP_004611693.2;XP_004605906.1	24.3047	23.9495	25.2875	25.8634	25.5321	24.3871	24.548	24.9826	24.7449	24.7894	25.1888	25.4678	25.1579	24.8051	24.7053	24.4329	25.7194	24.5907	25.1425	24.632	25.3762	25.7735	25.1458	25.306
XP_004611709.1;XP_004611708.1;XP_054976293.1;XP_054976292.1;XP_054976291.1	20.2779	19.1157	20.155	20.893	19.3043	19.4608	20.0892	19.4753	20.0527	19.0693	18.993	20.4491	19.9507	20.2256	19.4393	20.4781	18.1554	18.8596	20.4679	19.626	20.5339	19.2844	20.4087	19.8669
XP_004611716.1;XP_054974636.1	26.8503	27.0013	26.3577	25.9344	25.8537	27.0257	26.8303	27.3013	26.5446	26.3453	26.7178	26.0972	26.8617	26.828	26.6608	25.5774	25.6971	26.2597	26.004	26.6172	25.0297	24.8298	25.2279	25.4954
XP_004611747.2	18.3749	19.6315	20.6552	19.1428	19.4104	19.2792	20.5127	18.6428	19.2398	21.0188	19.7279	19.3992	19.2747	19.3406	20.7143	22.2615	19.9899	20.0127	19.8839	21.7747	21.0942	20.9313	20.766	19.8368
XP_004611760.2;XP_054988590.1;XP_054989817.1	23.9833	23.6876	24.3376	23.3924	23.0549	23.4646	23.7014	24.0842	23.8886	23.5946	23.5464	23.7554	24.1399	23.3564	23.7206	23.2891	22.6323	23.2499	23.5354	22.961	22.7945	23.474	24.0464	23.8223
XP_004611766.1	27.7336	25.8538	27.0066	26.5871	26.7851	27.678	27.9321	28.4178	27.2706	26.2356	27.2963	27.1792	27.5509	27.8604	26.8967	27.2256	26.9075	26.4706	27.0099	25.8773	28.0334	27.0732	27.1251	27.3771
XP_054986708.1;XP_054986707.1;XP_004611777.1	22.5196	19.2961	21.4781	21.2844	20.7606	18.839	21.3529	21.9961	21.513	21.4243	21.1898	18.8169	21.1052	20.5684	22.3352	21.7978	20.6549	18.866	20.936	20.7613	22.2087	20.8475	21.0968	20.5116
XP_004611796.2	19.0071	21.6162	22.9713	23.4385	22.0467	20.7903	20.8421	21.7446	21.6371	22.6359	22.6991	23.8318	22.1185	22.557	21.4353	20.8995	22.8914	20.5671	22.9836	20.5703	22.344	18.8541	22.2651	22.4402
XP_004611814.2	26.7542	25.8216	27.6668	27.8348	26.9932	26.7612	26.6216	27.3528	27.1807	27.4215	27.4275	27.3476	26.9739	26.9297	27.1316	27.297	27.9858	27.0772	27.6839	27.3499	27.1099	27.7546	27.0844	27.9968
XP_004611818.2	22.9927	22.1854	23.6392	23.4437	22.7432	22.7181	22.7406	22.7598	22.4384	22.1496	22.656	23.0605	23.1568	22.8603	23.0771	22.7027	22.9319	22.3821	22.1817	22.8512	22.6311	23.356	23.6052	22.6188
XP_054989196.1;XP_004611822.1	23.6522	23.5083	23.6618	23.4966	23.3889	23.2684	23.6098	23.6356	23.7451	22.783	23.6224	23.2478	23.6102	23.1817	23.562	23.0955	22.5684	22.8401	23.1276	22.4859	23.2523	22.7431	23.5085	23.4875
XP_004611839.2	21.876	20.2867	23.9296	23.9145	23.3231	21.9471	22.4168	22.3951	23.2131	21.2152	22.3769	23.5365	22.553	21.4598	21.9173	22.2645	23.2721	22.4522	22.743	21.1233	23.7504	23.3691	22.6918	24.036
XP_004611854.1	24.4958	24.4009	24.8163	24.9651	23.4937	24.6411	25.2093	25.0417	24.5024	24.181	24.6363	24.5811	25.3483	24.3552	24.2103	24.1471	24.413	24.4372	24.8895	23.8746	24.3908	25.2753	23.9302	24.8071
XP_004611946.2	27.4496	27.7347	28.0693	26.7953	27.2492	28.6317	26.1225	26.3097	26.5432	27.1077	26.8621	27.3972	27.7225	26.5408	27.5181	27.7582	27.6715	27.2944	27.0659	28.1553	28.8449	28.7768	26.9741	29.0505
XP_054974915.1;XP_054974914.1;XP_054974913.1;XP_054974912.1;XP_004611973.2;XP_054998891.1;XP_054998890.1;XP_054998888.1;XP_054998887.1;XP_054998886.1	20.093	20.436	23.535	23.2139	22.8812	21.0358	21.9035	22.1889	22.3161	20.9795	21.6847	22.5754	22.5891	21.1508	21.4587	22.3653	21.7776	21.4653	22.5196	21.4562	22.792	22.2221	22.8251	23.7979
XP_004612073.2	19.9519	19.3248	22.3812	24.478	25.6613	20.7999	19.8896	20.9969	20.2456	19.5401	22.7035	23.757	22.333	22.3263	22.301	23.0529	25.3271	22.7922	24.5652	23.6406	23.8914	24.7405	22.0097	24.4731
XP_004612100.1	25.589	26.4498	24.8075	26.1656	25.6929	26.3094	27.4875	27.6374	30.0779	25.4268	26.8138	29.0171	27.2105	27.3431	28.5163	29.972	27.6756	28.031	27.862	29.3672	28.8341	29.196	29.3097	27.6952
XP_004612144.1	23.3209	23.3149	23.5295	23.0662	22.858	23.7041	23.5446	24.1723	24.2187	24.1166	24.3997	23.648	23.8188	23.577	23.4584	22.2738	22.6925	23.0663	22.9118	22.402	17.9979	22.1639	23.862	22.1659
XP_004612166.1	20.8276	20.6228	19.9068	19.1682	19.2531	20.5041	17.8949	20.3964	19.7256	18.9582	20.1256	20.3806	19.817	18.9453	19.3867	21.2739	19.8225	19.4756	21.9305	19.1575	21.37	23.3987	20.6564	21.1198
XP_004612206.1	24.128	23.7807	24.5518	23.267	23.2174	23.8862	24.2232	24.6811	23.9798	23.0253	24.3151	23.5775	23.6877	23.3843	23.7704	23.3465	22.5218	23.0081	23.0082	23.2614	23.0245	23.5055	23.6162	23.4215
XP_004612244.1	25.9244	25.3312	26.6707	24.8607	26.2403	25.6187	24.8616	25.6185	25.7235	26.5067	27.1774	25.5559	25.3524	24.6782	27.038	26.4214	25.1628	25.2779	25.0181	26.1234	25.5145	24.2161	25.0484	25.4805
XP_004612283.1	20.9806	19.2633	21.0782	22.2653	21.5998	19.6214	20.447	20.9682	19.5987	19.2053	19.8526	19.6627	20.6454	20.2048	19.7878	21.0676	21.3336	20.4866	21.5128	21.2848	21.5321	21.7245	20.3562	21.3316
XP_054986714.1;XP_054986713.1;XP_004612353.1;XP_054986712.1;XP_054986711.1;XP_004612352.1;XP_004612350.1	21.6807	18.2992	21.3898	22.8657	19.2944	21.1695	21.029	20.3113	21.5628	18.3138	18.4905	23.4793	20.154	20.7055	22.4864	20.1041	20.6642	17.9875	19.1646	18.8932	19.7351	18.7586	19.4403	18.5743
XP_004612370.1	22.1108	21.2034	22.4753	21.0184	20.8956	21.5596	21.1491	22.0407	22.614	22.3924	22.5009	22.2224	21.7114	21.9651	21.6468	22.0315	21.4015	21.9853	22.1077	22.5853	21.1124	21.4063	22.6028	21.9743
XP_004612384.1;XP_054975231.1	25.4562	25.3701	25.6734	24.3547	24.8503	25.475	25.9326	25.9064	25.9536	25.7955	26.0254	25.5468	25.8056	25.5806	25.7275	25.4563	24.804	24.9161	25.0725	24.1363	24.0598	23.7363	25.0667	24.1272
XP_004612420.1;XP_054992594.1	20.5161	19.1076	22.7548	23.8528	23.6942	20.3768	18.9293	21.5791	20.1906	20.268	22.2692	22.9096	21.4248	21.5321	21.8776	22.3589	23.6537	21.0403	23.1901	21.2206	22.4655	22.9953	23.5999	22.8628
XP_054996877.1;XP_054996875.1;XP_054996874.1;XP_004612546.2;XP_054996873.1;XP_054996872.1	22.1308	21.7892	21.6692	19.0993	22.3995	21.4849	21.7465	21.8771	21.3201	21.1058	22.496	19.7105	21.1127	22.21	18.7244	19.9995	21.4935	20.5977	19.062	21.6579	19.3412	20.2468	21.7595	19.7688
XP_004612557.1;XP_054993839.1	21.0967	20.0222	22.5784	21.6905	22.1599	20.9058	20.9115	20.8959	20.2809	20.604	21.0461	21.9759	22.5962	21.4517	21.9614	21.7435	25.0434	20.2822	22.3321	21.2491	23.3473	22.5232	21.6898	23.4235
XP_004612566.1	21.1716	18.1447	21.6592	21.9128	20.5767	21.53	24.8144	20.9811	19.2911	19.2064	20.2885	21.4353	19.2172	20.6205	20.3629	20.3355	20.092	20.099	19.3858	17.9441	23.4848	20.9782	19.8029	20.5073
XP_004612596.1	24.0978	23.0916	24.9036	21.283	24.2233	23.5885	23.6574	23.8472	22.7092	23.9075	23.5684	23.7329	24.2666	22.712	24.1317	23.2593	22.8127	24.9186	23.1297	23.6804	24.4278	23.591	23.9152	23.2045
XP_004612614.1;XP_012788977.2	26.045	25.6429	26.5127	26.6502	26.494	26.1311	25.8285	26.4163	25.4324	26.3918	26.9848	27.3476	26.8584	26.627	26.7884	26.8401	27.6821	27.127	27.5861	26.1782	26.7944	27.4147	27.0471	27.4041
XP_004612616.1	22.2957	21.6811	22.808	22.0878	21.1809	19.2965	22.9682	21.9186	21.4122	21.4936	20.712	22.1858	23.2197	21.4639	22.3754	21.7289	20.2717	21.3642	21.0519	21.1492	21.7519	21.473	22.8114	21.9755
XP_054995509.1;XP_054995508.1;XP_004612617.2	18.6921	21.3725	21.2328	21.1592	21.4805	20.0925	21.2094	21.2829	21.7934	21.9895	18.2846	20.6844	21.803	21.5793	21.3834	20.1102	21.3561	20.8187	19.284	18.4944	20.8235	19.6096	22.0397	21.3444
XP_004612619.1	25.0964	23.5822	25.1076	24.3344	23.077	24.3485	24.0545	23.869	24.1451	24.1834	24.8973	24.3964	24.3747	23.397	25.3973	24.5228	23.6344	24.5186	25.0694	23.8	24.5612	24.4666	24.6071	24.9545
XP_004612653.1;XP_004612651.1	20.0061	19.9942	20.2286	22.0946	19.7759	18.9346	19.7204	20.2007	20.4668	19.039	22.2413	19.1253	19.3059	18.4446	19.7813	20.097	21.0704	20.0321	20.7653	19.8474	22.0397	20.59	24.6389	21.6541
XP_004612756.2	21.7768	20.8037	21.443	21.0924	19.0854	20.568	20.9936	22.4109	21.0739	20.093	21.1869	21.0622	21.8257	20.9003	21.8456	20.7565	20.1382	20.6184	20.0969	20.8279	21.6116	23.3901	21.6407	21.2302
XP_004612841.2	20.3778	20.0637	21.5374	22.5236	21.4505	19.2888	19.2212	19.2915	21.2813	21.0684	22.1224	22.195	21.3198	21.2527	21.9053	21.9125	22.972	21.9518	22.5413	21.5819	21.5674	23.2527	22.4621	22.3215
XP_004612891.1	21.8613	22.7135	21.8813	22.4042	23.1474	22.572	21.9909	22.5326	21.0195	17.9684	22.2939	22.4354	23.2821	22.2737	22.0882	21.8975	23.2276	22.1273	22.3805	20.7213	22.3816	22.0313	20.598	22.1878
XP_004612975.1	25.7946	25.5606	26.4174	26.794	26.0164	25.5772	25.9947	26.505	26.3224	25.912	26.8357	27.1047	26.7415	26.5699	26.4825	26.5925	27.2032	26.365	27.1542	26.9714	26.5697	26.8911	26.8738	27.1884
XP_004612991.1	26.096	26.2946	25.1076	25.4027	25.66	26.6023	26.1671	26.1848	26.475	26.7108	26.6672	25.9297	25.8315	26.2069	25.6088	25.2123	25.4933	25.3973	25.814	25.313	25.2317	25.3897	25.37	25.5091
XP_054977987.1;XP_004612992.1;XP_054977986.1;XP_054977985.1	25.7424	25.0279	26.5983	26.2312	26.0398	25.8733	25.8858	25.9243	25.8555	26.4571	26.2227	25.9033	25.6251	25.239	25.8363	26.0407	24.7808	25.469	25.7614	26.5183	25.9802	25.3777	25.7328	26.0139
XP_004612999.2	21.1009	22.133	21.9711	23.1233	22.1221	19.2535	22.1322	22.4615	22.8495	21.593	22.0949	22.5824	21.1941	22.5337	21.1608	21.808	21.9006	21.5095	22.4871	22.0949	22.6056	22.2899	22.686	22.8134
XP_004613012.1	24.8019	24.1288	25.4823	26.1189	25.5152	24.8648	25.7493	25.4926	25.1866	24.5347	25.5156	26.2142	26.0509	25.0818	24.637	25.1773	25.8904	25.2403	25.9204	25.1618	26.016	25.5483	25.2855	25.7897
XP_004613015.1;XP_054997713.1;XP_054997706.1	24.0462	19.6102	22.6181	24.0705	21.987	22.7494	23.2706	23.1458	22.3617	21.8843	21.8702	21.7127	22.6629	21.4696	22.3395	21.4506	19.0002	21.9716	20.3982	19.9171	24.1902	20.4969	21.1891	21.979
XP_004613017.2	23.0316	21.9361	22.147	20.9715	21.3935	22.2306	21.961	22.4544	21.7801	20.4523	21.5887	22.1653	22.4156	21.9373	21.6406	21.3603	21.158	21.3837	21.8521	21.1993	22.2211	21.2687	20.6577	21.6183
XP_004613070.2;XP_055000285.1	19.3747	19.0063	21.6161	21.8087	21.0971	20.3606	20.0184	19.6762	18.7579	18.2207	20.6727	21.5088	21.365	19.2099	20.8694	20.9745	21.4098	19.5725	19.2769	19.1775	21.8294	21.2797	22.279	21.5435
XP_004613071.2;XP_055000291.1	21.0102	20.9124	22.7859	23.56	22.8113	21.0971	20.0971	21.8064	22.1823	21.9654	22.789	23.3941	22.5488	22.3263	18.5123	21.8378	22.8209	21.7773	22.5048	20.4879	21.7724	22.1532	21.7669	22.2686
XP_004613115.2;XP_055000744.1;XP_004613077.2	24.5693	24.189	25.0366	25.4547	25.1192	24.2833	24.9717	24.4878	24.3608	24.2574	25.3075	25.5295	25.6059	24.3479	24.7139	24.9647	25.7681	24.6317	25.2941	26.302	25.6424	25.694	25.4322	25.5404
XP_004613151.1	18.5327	18.3032	21.579	20.3928	19.0588	21.4682	19.6598	21.0173	21.408	19.4618	18.2111	21.4539	20.3988	19.531	20.5537	18.0983	19.9898	19.6705	21.7576	19.0873	23.0358	18.19	19.6372	22.1697
XP_004613177.1;XP_054976858.1	23.3112	23.1688	23.3514	22.5949	22.2905	22.8794	22.5571	22.3891	22.3412	22.3951	22.2389	21.3643	22.1164	23.2638	22.3228	22.2198	20.6832	21.3216	22.2308	21.14	21.472	21.4036	22.5943	22.2107
XP_054978644.1;XP_004613223.1	20.2591	20.3602	19.4977	22.8513	20.7199	19.3155	20.3913	19.172	19.3637	19.0459	18.0749	22.5577	21.6714	21.0445	19.5898	21.6019	23.7906	22.7892	21.3484	18.9872	19.0921	21.3237	20.6223	21.6775
XP_004613255.2	22.2153	20.4028	22.732	22.6244	21.216	21.3417	19.821	21.9834	20.659	20.0662	22.3358	20.3461	22.3825	20.4684	22.6744	22.0111	20.7831	21.9786	22.7372	21.3334	21.3587	23.0786	21.2118	22.6658
XP_004613271.1	22.8839	18.2024	24.8225	26.1966	25.4341	20.1797	19.8507	21.6668	20.7921	24.1347	24.6707	25.3991	23.5614	24.0995	24.0743	24.9213	26.8387	24.2971	26.2202	23.7473	25.7665	26.3592	24.6693	25.644
XP_004613291.1	23.2946	21.9084	21.5182	21.7837	21.3467	22.206	22.1853	22.064	22.7581	22.7422	22.6104	21.8113	21.7103	21.7286	21.9778	21.3403	18.922	21.2491	21.6835	19.2206	21.7056	21.8739	20.6052	21.1399
XP_004613388.1;XP_054984174.1	24.1757	24.9807	24.6437	24.5616	23.8832	24.204	24.8321	24.8524	24.1863	23.418	24.138	25.2127	24.2881	24.0462	23.7351	23.1551	24.1678	23.1772	23.2411	22.1029	22.6233	24.6362	23.3565	22.626
XP_004613477.2	21.5887	20.8581	25.8105	27.6759	26.299	22.2481	21.2984	21.1866	21.2861	24.9184	25.3054	26.2854	23.4594	25.0637	23.5566	25.2898	27.9635	25.0615	26.9429	23.9267	25.6662	27.3885	25.1036	26.9733
XP_004613554.1;XP_054977113.1;XP_054974182.1;XP_054980104.1	27.0979	26.3874	27.0577	26.3204	25.8941	27.0541	27.7081	28.1042	26.8397	26.4241	26.8592	26.8071	27.3876	26.7473	26.7851	25.9875	25.9659	26.6917	26.3998	25.9497	25.6201	26.0906	26.7709	26.9496
XP_004613621.2	24.1134	24.1836	23.6772	22.8925	23.316	24.7503	24.8694	24.9717	23.4321	24.0235	25.9283	24.2072	23.6145	24.0699	23.7096	23.8744	24.4053	23.8784	25.3161	22.8301	24.0306	24.1972	22.8126	23.337
XP_054997260.1;XP_054997259.1;XP_004613624.1	25.8408	25.9129	26.4564	25.5667	25.6943	25.9514	25.8987	26.1053	25.7616	25.2221	25.7989	25.7947	25.8082	24.8454	25.2697	25.5949	24.637	25.4145	25.4486	25.3387	25.0385	25.3214	25.8843	25.417
XP_004613637.1	24.2095	22.6814	23.7275	23.3002	23.5517	23.6939	23.7772	23.1725	23.2733	22.9685	22.7397	23.3001	23.4606	23.1371	23.4753	23.8006	22.7885	23.0369	23.0594	22.8043	23.0597	23.0126	23.4434	23.4002
XP_004613808.2	19.6353	19.6762	21.8015	21.6507	21.8994	19.7185	18.7443	19.2917	19.8321	18.9541	21.2023	21.8491	22.5125	18.9915	19.5426	19.4367	23.8926	20.3313	22.714	19.5463	22.1044	23.3881	22.6908	21.7432
XP_004613809.1	18.3109	18.9632	20.732	19.9357	21.3793	21.592	21.0358	22.1412	21.06	22.0511	19.3116	20.2879	20.3853	22.0296	19.526	19.0456	19.6213	18.9564	20.1483	19.0996	19.0647	18.6254	20.4366	18.3581
XP_004613813.1	22.3017	23.5462	22.6214	22.0843	22.1449	22.8444	22.1616	23.4493	22.4743	22.9134	23.9424	22.9098	23.13	22.9231	22.8399	22.875	21.5636	21.5515	22.4563	21.1145	22.9887	21.3082	22.0833	21.7743
XP_004613820.1	21.8699	19.1141	21.8968	19.8038	20.0228	19.542	19.7995	20.7429	19.6667	20.6005	20.7643	21.107	18.4905	19.1943	21.8378	19.4202	18.9484	18.4971	21.7717	22.6695	21.6129	21.0569	21.0604	22.2102
XP_004613830.1;XP_004606782.2	23.8646	23.0969	23.3537	22.8442	23.0683	23.6881	23.9515	23.9113	23.5369	23.4471	23.7033	23.0787	23.3188	23.5236	23.472	22.6461	22.8174	22.7615	23.0054	22.8241	23.9879	22.7331	23.0396	23.2223
XP_004613899.1	22.1136	20.98	20.0632	19.12	20.6787	22.0036	23.9081	21.4531	22.391	19.7563	20.3208	19.2659	19.586	21.0862	19.0495	19.272	19.7327	17.9987	18.9166	19.9096	23.4239	19.0882	19.1365	19.845
XP_004613931.2	21.9974	21.0678	22.5083	22.9927	22.7442	22.4543	22.3953	22.6108	21.6969	22.5988	22.4942	22.9953	22.3879	21.8862	21.9415	22.1738	22.2906	22.057	22.3306	22.3273	22.651	22.7708	22.9404	23.0918
XP_004613932.2	21.4583	20.9994	20.2468	20.4872	19.9935	20.0518	20.2821	19.6112	21.9005	19.643	20.7881	22.2391	20.2867	22.7415	19.8855	20.8121	19.1764	19.5171	21.24	21.2653	21.6375	19.4951	21.1689	19.9153
XP_054978685.1;XP_004613952.1	22.2311	22.4824	24.6201	22.755	23.7071	25.497	22.9873	23.3565	23.2568	25.072	21.3506	21.6305	22.1354	22.2335	21.8066	21.624	21.4331	21.2516	21.1059	21.5474	20.5134	20.7162	22.5786	21.7817
XP_004613953.1	21.902	22.7342	22.5917	22.5655	22.5536	24.0395	19.8659	23.6297	23.2595	22.3819	23.5409	19.3103	22.5172	22.7959	21.5967	18.5086	22.3369	22.0576	21.0474	19.9888	19.232	19.5162	19.7623	19.814
XP_054996304.1;XP_012787017.2;XP_004613989.2;XP_054998681.1;XP_054978697.1;XP_012788792.2;XP_054993250.1;XP_054998678.1;XP_012789146.2;XP_012787912.1;XP_012787092.2	22.9569	21.6898	22.97	23.4442	23.147	22.3197	22.3954	22.9432	22.8978	22.9458	22.8379	22.9133	22.7182	22.19	22.0822	22.6368	22.8286	22.4626	22.7434	21.4076	21.8612	22.3408	22.3491	22.7845
XP_004613999.2;XP_054984906.1;XP_054984905.1;XP_054984897.1;XP_054983253.1;XP_054983252.1;XP_054983251.1;XP_054983250.1;XP_004621996.1;XP_004621948.1;XP_004621944.1;XP_054984895.1;XP_004621992.2;XP_004614003.1;XP_004614002.1	31.5591	30.1627	31.3228	31.1654	30.6576	31.206	32.1097	31.3595	31.1609	30.7442	31.1399	30.6473	31.8969	31.2932	30.4674	30.3441	30.5489	30.6245	30.7606	29.6605	30.0144	29.7963	29.765	30.2547
XP_004614067.1;XP_054993061.1	22.0927	22.0694	22.5043	21.4853	21.5296	21.6479	22.1741	23.0065	23.6608	22.5261	23.0402	22.773	21.6688	21.1266	21.2464	21.3797	19.0307	21.5401	22.4242	22.9212	19.684	23.0995	22.4621	21.1028
XP_054992427.1;XP_054992426.1;XP_004614069.2	25.1568	25.1493	26.0798	26.5785	26.4562	25.594	26.0181	26.0146	26.6619	25.3055	25.8413	26.2274	26.1138	25.4106	25.7636	25.5425	26.1265	25.942	26.4664	24.5692	25.5996	25.4914	25.6148	25.6241
XP_054975950.1;XP_054975945.1;XP_004614100.3	21.4438	21.3883	21.4103	21.5524	18.8122	20.7844	18.1634	21.2876	20.8823	20.149	21.7636	20.7914	19.2293	19.8298	21.1286	21.2149	20.2871	21.0097	21.3396	21.1425	18.7707	20.4268	20.2741	21.4227
XP_004614109.1	22.0944	21.9655	23.2122	21.9527	22.5441	20.0776	21.4067	20.9869	22.9255	22.0968	22.269	21.8855	22.2952	20.964	22.0362	21.6611	18.5789	21.6027	21.3953	21.3244	22.1654	22.3348	21.787	22.4911
XP_004614165.2	18.9062	19.4638	20.1164	21.5419	18.0571	19.6035	19.2177	19.3044	18.68	19.0109	20.2216	19.2396	20.049	20.263	20.4301	19.1231	21.7403	20.5117	20.8346	19.1305	19.003	18.9301	20.7982	20.592
XP_004614194.2	19.7782	17.544	19.9275	21.3727	21.2547	20.2522	20.1534	20.3332	20.5443	18.284	21.3442	21.6682	19.4234	20.7779	21.1176	21.1848	21.8426	21.6624	22.2368	18.4542	21.3416	22.0944	19.8186	22.4826
XP_004614196.2	25.3406	24.1831	24.9714	25.8915	24.623	25.5096	26.2732	26.3804	26.1985	25.4303	26.0982	25.3519	25.8978	25.6759	25.0352	24.2944	25.0215	24.9638	25.661	26.3347	24.6222	25.2786	25.4333	25.3943
XP_004614239.2	24.56	24.4726	25.1942	24.6181	24.3277	24.1932	24.7818	24.6714	24.5631	24.1138	24.3266	24.5998	24.8146	24.206	25.1834	25.7041	24.3227	25.1691	24.2257	24.7167	23.8469	24.2579	24.8437	24.9083
XP_004614275.1	22.6622	21.0346	22.5903	21.7075	21.4213	22.2161	22.0033	21.8117	21.7372	22.027	23.2706	22.295	22.4058	21.6977	22.6488	22.3311	20.3622	22.5083	22.7674	22.5553	22.5549	21.7878	23.6147	22.6974
XP_054994536.1;XP_054994535.1;XP_054994534.1;XP_004614276.2;XP_054981614.1;XP_054981613.1	22.0722	22.6235	22.8103	21.7852	23.8091	21.5691	23.5089	23.3892	22.853	21.4147	23.1845	21.4355	21.4808	22.4574	23.2814	22.6666	22.7012	22.9498	22.5117	22.3867	24.2905	22.4213	23.1533	23.3515
XP_054996862.1;XP_054996861.1;XP_004614285.1	26.7473	25.8689	25.071	24.8723	25.0685	26.7376	26.8431	26.4492	26.4241	26.2936	26.2075	26.5397	25.7139	26.2049	26.0199	25.6589	25.1599	26.4959	25.9393	26.3009	24.6624	26.6585	25.8923	25.1972
XP_004614289.3	24.1292	23.5998	23.4862	23.3184	23.1718	24.089	24.2977	23.8145	24.2852	23.7816	23.4282	23.155	23.2304	23.2129	22.5124	22.6305	22.5935	22.8225	22.4744	22.2208	20.5329	19.5417	22.3169	21.9439
XP_004614314.1	22.3986	21.8617	21.6056	22.2213	22.1492	22.4808	22.8747	22.8146	22.8308	22.2392	22.3578	22.5604	22.3168	21.6123	22.5872	22.0005	21.7874	21.4921	22.1191	22.8133	22.601	21.7663	22.7445	21.9582
XP_054996569.1;XP_004614336.1	25.507	24.8147	25.6583	25.4006	25.0663	25.6068	25.2712	25.5492	25.4452	25.1862	25.3308	25.5605	25.4648	25.3149	25.5523	24.8228	24.7703	25.2148	25.1575	25.3241	25.0592	25.4622	25.4989	25.7114
XP_004614459.1;XP_054986832.1;XP_054986831.1	21.2637	18.7852	21.4269	20.2851	18.9076	20.5831	21.6041	21.1455	20.5077	19.5384	21.152	20.5892	21.6508	20.8772	21.0661	19.4149	19.1143	19.4229	20.6995	20.5134	20.4672	20.1924	21.4271	20.4495
XP_004614519.1	24.224	23.3832	24.7941	24.4827	24.5164	23.7417	24.4507	24.0188	23.8185	23.9147	24.8652	25.0956	24.654	24.897	24.7687	24.3079	25.4671	24.5174	24.7785	24.223	24.7508	24.9621	24.3778	25.5535
XP_004614520.2	25.27	25.2101	25.3977	25.2684	25.2474	25.3986	26.2615	26.0387	25.7931	24.7945	26.3337	25.5236	25.8385	25.401	25.2565	24.4276	24.4578	24.9929	25.2931	24.4373	24.9879	25.0748	25.2717	24.8394
XP_004614532.1;XP_054978350.1;XP_054978349.1;XP_012789502.1;XP_054983356.1;XP_054983355.1;XP_054983354.1;XP_054983353.1;XP_054983352.1;XP_054983351.1	21.1651	20.001	22.678	22.4896	22.081	20.4137	20.6424	21.8264	21.6465	21.1815	22.4139	23.3448	21.9834	20.9962	21.726	21.9104	19.7399	21.0865	22.2818	23.5438	23.4343	22.5686	22.4253	23.2112
XP_004614607.1	25.1459	24.1626	25.5348	24.6066	24.5189	25.0634	25.6001	25.8308	24.8297	23.9174	25.3665	25.3109	25.6312	24.6443	24.7658	24.3193	24.8495	24.7215	25.178	24.1056	25.0088	24.4466	24.7995	25.0908
XP_004614628.1	23.6237	22.6501	24.0921	25.2031	24.4891	23.1063	24.2873	24.086	24.3796	22.8452	24.5326	24.0595	23.9423	23.433	23.2198	23.6468	24.9533	23.4645	24.2162	25.1209	24.1575	25.4522	23.6171	24.5928
XP_004614663.2	22.5989	20.883	23.4143	24.2617	23.8087	21.1287	21.6396	22.9369	22.164	21.9238	23.5672	23.7364	23.357	22.6862	23.2338	22.428	24.0053	22.1335	23.4699	21.2069	23.1461	23.8285	24.1218	23.4242
XP_004614710.2;XP_055002150.1	21.775	20.8395	21.3166	23.6672	21.8729	18.3776	19.6331	18.4515	20.011	22.058	21.7818	23.1686	22.2703	20.6877	19.8575	20.7407	24.4389	20.2423	23.5231	20.1422	22.5947	23.6756	21.8415	24.608
XP_054978328.1;XP_004614793.2	23.3514	22.9821	24.1669	23.7805	24.1626	24.3577	24.5195	24.7609	25.1864	25.0913	24.5068	23.851	24.7647	24.7298	24.3661	24.7089	23.9908	25.3719	24.0951	24.9049	24.3303	23.8443	24.2981	24.1234
XP_004614818.2;XP_004614817.2	18.7913	19.3904	20.4364	20.6899	19.074	18.5864	21.1589	22.0233	21.9572	20.6593	17.805	22.825	20.3802	20.8634	19.3987	19.1853	18.8729	20.7447	19.2883	19.5171	19.7277	19.8596	21.1388	20.7542
XP_004614820.1;XP_004619362.1	23.9741	23.8746	23.8612	23.2755	23.0104	24.4102	24.4905	24.339	24.3793	23.948	24.3411	24.0756	23.7702	24.2157	24.0781	24.0668	22.9559	24.5553	24.0894	23.6984	24.01	23.567	23.6175	24.0132
XP_004614825.1	19.6954	18.1017	19.8092	20.3755	19.545	19.0431	19.2838	17.9409	19.7261	19.2545	18.3497	19.8348	19.5745	18.5141	19.4681	20.6459	20.2222	18.6619	20.1843	21.7671	21.0235	21.2562	21.334	21.9386
XP_004614851.1;XP_004614848.1;XP_054977886.1;XP_054977879.1;XP_054977871.1	23.6548	22.6415	23.3056	23.0533	22.8066	23.2142	23.0381	23.2551	23.2349	21.9797	22.462	23.3616	23.9247	23.3909	23.4559	21.7808	22.1275	21.7665	22.3119	21.5281	22.5423	22.949	22.8696	23.1475
XP_004614854.1	30.6015	29.7029	29.9408	29.9327	29.7658	30.2437	30.3809	29.9324	30.5381	30.7729	30.5386	29.9902	29.7188	29.6275	29.8559	29.7821	29.0829	29.8131	30.1627	29.5772	29.5356	29.8925	30.0156	29.6634
XP_055001769.1;XP_004614858.1	21.1908	18.8985	20.3549	18.4444	20.108	21.3485	21.3775	21.8872	20.9016	20.5932	21.7558	21.6906	21.9244	21.8372	20.5162	20.7856	24.3806	20.5695	20.866	20.7772	21.4266	24.4159	21.6626	19.1702
XP_004614868.1	26.8297	27.0576	27.7601	26.1752	26.7326	27.2857	27.7574	27.1874	26.9915	26.8908	27.2889	27.1929	27.6209	27.2687	27.0601	26.7239	26.4929	26.6626	26.4416	26.0573	26.765	26.1396	27.1707	26.415
XP_054982690.1;XP_054982689.1;XP_004614872.1	21.5284	20.6541	23.2564	22.0395	21.5952	19.4018	22.4231	22.5451	22.4838	20.2764	22.1762	21.4187	22.1452	21.7005	21.8564	21.9151	20.5416	21.429	22.1918	21.0141	21.8059	20.9802	21.2053	20.8893
XP_004614967.2	20.3264	18.5702	20.2113	19.7194	20.287	19.7349	20.0389	19.4475	19.6481	18.5307	18.8187	20.3416	20.7899	19.4843	21.6773	21.6758	19.1519	22.708	19.111	21.6968	21.3591	18.4984	20.3637	21.4712
XP_004614986.1;XP_054984736.1	21.2168	21.618	23.2925	23.9563	23.4784	21.0034	21.1858	21.4254	22.129	22.2193	23.0206	22.7315	21.2609	20.506	21.9744	22.4156	24.2806	22.5445	23.1308	23.8204	22.8837	23.4937	22.7978	23.7002
XP_004615011.2	25.2638	24.9877	25.3583	24.5963	24.767	24.4774	25.4835	25.0609	25.5678	25.0196	25.5117	24.9781	25.5705	24.8173	24.6674	24.0274	23.6082	23.8878	24.3496	23.6898	24.3885	24.0031	24.3165	24.0236
XP_004615253.2	24.3598	24.6426	25.0305	24.8479	24.2926	25.3134	25.7957	25.7754	25.4962	25.9482	25.8082	25.839	25.1729	25.6812	25.6007	25.5917	25.2149	25.8606	25.6613	25.4005	25.0179	25.3872	26.0397	25.5848
XP_004615265.3	23.7928	23.4488	24.4494	22.852	23.648	24.165	23.4933	24.591	24.0295	23.1965	23.684	23.8829	23.4467	23.0145	23.8982	23.8931	23.2677	22.9015	23.5637	23.2754	23.3251	24.5902	23.6182	23.7273
XP_004615304.1;XP_012791274.2	22.0535	22.8296	22.6437	22.6981	22.8945	22.3125	21.4681	22.3437	21.3247	21.5257	22.864	22.7842	22.1363	22.2087	22.7431	22.5247	22.7223	21.9402	23.4504	22.5369	23.1263	23.149	22.8484	22.9631
XP_054991958.1;XP_004615308.1;XP_054977493.1;XP_054976617.1	22.3446	20.981	24.0499	22.2865	21.371	22.938	22.9952	23.1099	23.1847	22.1132	24.0132	21.2914	23.2541	21.326	23.2551	22.6915	21.0725	22.8258	22.5285	21.4957	22.4926	19.1716	22.8	23.4219
XP_004615309.2	24.4	23.7138	24.7172	24.3056	24.3912	24.3896	24.5298	24.5659	24.8242	25.4713	24.9317	25.2915	24.7913	24.6349	24.9772	24.0808	23.897	23.9695	24.1529	24.2953	23.9964	23.4692	25.2259	24.2614
XP_004615316.1;XP_054990644.1	20.8334	19.0154	22.3037	19.3681	19.751	20.6068	22.006	19.42	21.8506	22.2134	22.1098	23.0213	22.9695	22.2659	20.8488	19.6876	21.3458	21.9625	22.4332	18.7173	21.1878	22.0204	22.4104	21.9488
XP_004615324.1	18.5411	18.8563	19.4332	20.7621	19.2421	21.5577	19.4306	21.1762	21.4468	20.9121	21.7493	22.0874	18.7482	21.7783	21.1803	21.6745	22.7412	21.2492	22.259	20.9951	21.2139	22.0132	22.4114	21.7953
XP_004615327.1	23.6426	22.6882	25.1584	26.2521	25.8151	18.2208	23.3318	24.2339	23.7732	24.5917	24.8486	25.4483	24.4232	24.3748	24.7926	25.1831	26.8572	24.8661	25.8811	24.66	25.4738	25.9536	25.1804	26.0117
XP_004615363.1	21.4138	18.3668	22.4204	22.7054	22.3704	20.5243	21.0555	21.7466	21.2502	21.0483	22.6472	22.962	23.573	23.1831	24.2081	22.8263	22.8509	22.9741	23.4131	18.3573	22.2603	22.0709	23.9781	22.3935
XP_004615385.2	21.126	17.678	22.1941	22.3088	22.8974	22.2013	19.7072	22.279	22.1234	20.4598	22.452	22.5401	22.1935	22.452	19.6135	22.2578	24.7599	22.1888	22.5449	22.231	19.0531	22.1451	22.2615	22.1397
XP_004615386.1	22.7428	22.6813	23.8665	24.3823	24.5077	23.5385	24.1908	23.6948	24.3421	24.9524	24.7448	24.9276	24.076	24.1935	24.768	24.9679	24.78	23.9142	24.3562	24.4303	24.7108	24.0678	25.5182	24.2347
XP_004615500.1;XP_054994964.1	21.4233	22.4365	23.1001	21.0463	22.0373	18.4318	21.4982	23.0158	21.5699	19.7961	24.4285	23.8442	23.7295	23.1026	24.1701	21.648	23.0863	23.4763	23.0521	21.6471	21.6412	18.2037	24.6989	22.6198
XP_004615522.1	21.4932	20.9773	20.8876	20.5261	19.3793	21.3568	21.4709	20.6986	21.1863	21.5356	20.7607	19.8752	20.9543	19.1016	20.2151	19.7257	18.7906	20.0642	18.6478	19.7725	20.811	20.792	19.7833	18.7985
XP_055003343.1;XP_004615555.2;XP_004615554.2	20.481	19.9407	21.0743	19.594	18.743	20.4698	21.4199	21.5934	21.0609	18.5914	19.5586	18.6286	18.0954	18.7474	20.8162	19.0539	19.4353	19.2504	19.5204	19.9124	20.3958	18.5371	18.097	19.238
XP_004615563.2	18.4396	19.2552	17.7561	19.5686	20.9321	18.7769	20.0098	19.796	20.4775	21.1841	20.7771	20.7228	20.899	19.2943	20.6236	20.8916	20.6279	20.6991	20.363	19.2753	20.2674	18.7852	18.6191	19.1797
XP_004615585.1	22.5675	21.6959	23.4077	24.7914	23.4266	21.3277	21.5078	22.3182	22.9246	21.2703	23.4715	23.7139	22.2286	23.9256	22.6753	22.5129	24.2686	22.4284	23.6677	22.7891	23.2549	23.6406	23.1996	23.9151
XP_004615592.1;XP_054992166.1	23.0372	22.1708	23.2257	23.5471	23.4594	23.6436	23.9088	23.9277	24.2834	24.2289	24.1343	23.5217	23.1639	24.7591	23.0256	22.8439	22.8302	23.2799	24.0307	23.1304	22.2384	22.8044	23.5648	23.1622
XP_055001489.1;XP_055003550.1;XP_055003549.1;XP_055003548.1;XP_055003547.1;XP_004615678.2;XP_055003546.1;XP_054997580.1;XP_055003551.1	22.8688	21.7799	22.622	22.2418	22.5081	21.9036	22.6989	22.4098	22.4638	21.8735	21.9028	21.7662	22.5839	21.9387	21.5315	21.2063	21.0854	21.2924	21.2271	19.5432	21.0542	20.9526	21.5047	21.1866
XP_004615689.2	22.2408	19.172	21.2611	19.6695	20.0472	21.9045	20.1999	19.8484	19.5896	21.9083	21.1364	19.8775	19.6704	17.7852	25.1867	24.4925	19.9543	23.6527	22.0742	22.2866	23.4308	23.0085	21.838	24.833
XP_004615719.1	21.7263	23.8709	21.5817	21.0867	19.2317	22.2366	22.3182	21.8525	19.2617	19.028	21.0342	21.9181	21.6059	22.278	22.631	19.9067	22.9797	18.6862	21.8466	20.8444	19.4178	19.3028	21.5212	21.8123
XP_004615724.1	28.1723	27.6017	28.1674	28.152	27.9064	27.7124	28.5571	28.5631	28.4332	27.9829	28.3169	27.9835	28.3939	28.1065	27.8266	27.5967	27.0821	28.1	28.0377	28.5694	27.7122	28.3784	28.0085	28.3137
XP_004615734.1	23.1742	22.5345	23.5463	23.0508	23.082	22.6437	23.2859	22.8325	23.6917	23.3988	24.197	23.5051	24.1138	22.515	23.1048	23.021	23.1442	22.8162	22.9148	22.9056	23.2743	23.2984	24.6177	22.9871
XP_004615803.1	22.2216	20.782	22.7468	21.6336	21.0918	21.3651	21.9394	21.4934	21.7934	22.0376	21.677	21.3583	22.0779	20.8066	22.3469	21.2147	21.2081	20.9069	21.3133	21.4	22.5957	21.9154	21.8085	22.2182
XP_054976074.1;XP_004615853.1	21.0358	19.0402	21.8674	21.5842	20.8049	19.9973	19.2558	19.3703	18.6331	19.9713	19.7148	19.9727	20.3617	19.6611	19.0012	20.3523	19.0604	20.4761	20.3678	19.8787	20.4164	20.7446	20.7645	21.2367
XP_004615894.1	19.9916	17.3357	22.8855	24.0842	23.8812	17.7544	19.5102	18.127	18.2908	19.0722	22.2631	23.2139	21.2225	22.0072	21.2892	22.9222	24.802	21.6782	24.127	20.3799	23.3748	24.0737	21.9718	23.91
XP_054992127.1;XP_054992125.1;XP_054992124.1;XP_004615896.1	19.335	20.7168	20.8006	21.6429	19.9672	22.2266	20.4232	21.5848	20.2791	19.8078	19.6539	20.511	19.1161	20.9486	20.7538	19.997	23.5873	19.4998	19.0665	19.9657	20.4596	22.5267	19.8074	20.8927
XP_004615901.1	23.0861	22.4908	22.9358	22.4177	22.647	22.0573	21.3089	22.9568	21.4195	22.1943	22.6265	22.262	23.1168	21.4883	23.6994	21.5919	22.0539	20.9974	21.8775	20.7995	22.8462	20.8784	22.5978	21.1521
XP_004615968.1;XP_054988611.1;XP_004608631.1	21.0579	19.5561	21.6483	22.2458	22.2776	20.0007	21.5053	21.715	21.2311	21.3027	18.999	21.2108	19.635	19.0491	22.0544	21.465	21.9555	19.0614	22.7487	19.223	23.6807	21.7033	21.9768	23.2883
XP_004616002.2;XP_054991235.1;XP_054991234.1	20.3296	21.345	21.2652	21.714	21.4072	20.0945	19.5046	20.8601	20.3575	18.756	19.6681	19.3453	18.1908	21.127	21.4543	20.7569	20.9256	21.1588	19.0132	20.9539	21.1921	20.7123	19.1912	21.9009
XP_004616003.2	19.6577	21.3891	20.9507	21.8251	19.2362	20.3432	19.9106	20.8465	21.2374	19.107	19.7512	21.8147	20.4761	20.7634	20.0651	21.771	21.711	21.3377	22.3472	18.1292	20.9632	21.9921	21.6035	21.3394
XP_004616018.1;XP_054992193.1;XP_054992192.1;XP_054992191.1	21.0321	20.9813	22.513	21.4723	21.2991	20.7356	21.6384	22.1882	22.5862	19.5366	22.8173	21.8007	20.4601	21.2895	20.5743	18.9383	22.3253	21.517	20.9294	18.2055	20.7856	19.9648	20.9589	21.1014
XP_054977927.1;XP_004616102.2	24.04	23.8511	24.892	24.5157	24.5988	24.4085	24.5754	24.8223	25.4518	24.6902	25.0134	24.4812	24.7223	24.602	25.3812	25.234	24.3784	24.9578	25.1858	25.5744	24.726	24.8361	25.7488	25.4228
XP_004616151.2	22.4599	20.9218	22.8631	21.6796	22.1893	21.2421	22.6681	21.8167	22.1186	21.0184	22.1785	21.9336	21.8961	21.0968	22.8064	22.1867	21.3598	21.2337	22.1012	21.7207	21.5609	22.5217	22.0919	21.9705
XP_054984131.1;XP_004616173.2	20.7537	20.6844	20.8055	21.963	21.9503	20.2195	19.5284	20.9232	20.3122	19.4897	19.3662	20.945	21.1331	20.8143	19.6944	21.094	22.3202	21.1834	22.1344	19.5165	21.7459	22.2891	21.8007	21.6567
XP_004616184.1;XP_054979879.1;XP_054978060.1	23.0185	22.1463	24.8682	24.6065	23.2294	23.4289	24.2972	24.4847	23.7046	23.3918	23.7866	23.6561	23.7578	23.5677	23.7625	23.5629	23.1539	20.8091	23.7096	21.1378	22.8336	23.9409	23.6938	23.4193
XP_004616186.1	22.999	21.4577	24.1834	25.5635	24.8942	22.1438	22.9514	23.3202	23.1892	22.6243	24.4495	24.7575	23.5926	23.4748	23.7286	24.3318	26.536	24.1267	25.9269	23.3913	24.4784	25.7362	24.1009	25.7574
XP_054984218.1;XP_054984217.1;XP_054984216.1;XP_054984215.1;XP_004616214.1	20.9439	19.7972	21.1594	21.1828	21.0829	21.2417	22.6849	21.923	22.2172	20.9431	22.0268	19.7613	21.3102	20.5032	20.8243	19.2398	21.0993	20.6354	20.9227	19.9536	19.1484	20.9026	21.346	20.6976
XP_004616227.2	20.9458	20.25	19.8927	18.5068	20.6334	18.7909	19.8047	19.9182	19.2471	18.6062	19.6022	18.4341	19.5174	21.1648	21.4988	21.6202	22.396	21.3342	19.7645	19.6966	22.1577	22.6417	19.8015	21.7594
XP_054974058.1;XP_004616302.1;XP_054998570.1;XP_054998569.1	23.5874	22.937	22.2042	22.5594	22.5898	19.5129	23.3885	23.343	19.7916	20.1875	23.019	23.809	22.9959	22.7592	23.3047	23.4735	21.7547	23.4939	22.6291	22.2187	23.001	22.7192	22.889	23.0895
XP_004616322.1	23.2448	22.81	23.907	22.8959	22.9307	22.9381	23.397	23.5189	23.3795	22.9088	23.1074	23.0784	23.3406	22.5273	23.2448	22.0776	22.446	22.2436	22.1274	23.0976	23.9635	22.5775	22.2765	22.8043
XP_004616393.1	20.8695	18.6761	20.514	19.4241	19.8679	19.7311	20.3468	20.6667	18.5834	19.2387	19.9464	19.8983	19.4463	19.3262	19.2332	18.6958	19.8397	17.9373	18.8078	20.2959	19.9699	19.2329	20.1673	19.7459
XP_004616411.1	24.8799	25.4014	25.1595	25.2444	24.8257	25.3365	25.9617	26.0459	25.4387	25.1907	26.1816	25.6571	26.0898	25.2383	24.9947	24.3678	24.5769	25.4622	25.5812	25.0378	25.383	24.6913	25.0384	24.861
XP_004616420.1	25.1009	24.8627	25.6151	25.8624	25.8276	25.1093	25.4899	25.3363	24.8683	24.8386	25.7461	25.997	26.3389	25.9426	25.8177	25.5575	26.6568	25.8713	26.1713	26.0649	25.608	25.636	25.6463	25.8118
XP_004616432.1;XP_054979897.1;XP_004606954.1	26.3213	25.5017	26.8099	26.1541	26.022	25.4788	25.3278	26.1247	26.1331	25.6181	26.4257	26.0557	26.3162	25.5816	26.0813	26.0415	25.7972	26.3612	25.9564	26.1419	25.9873	25.9913	26.6313	25.8779
XP_054975305.1;XP_054975293.1;XP_054975325.1;XP_054975309.1;XP_054975324.1;XP_054975308.1;XP_054975306.1;XP_054975304.1;XP_054975302.1;XP_004616446.1;XP_054975301.1;XP_054975300.1;XP_054975323.1;XP_054975298.1;XP_054975297.1;XP_054975296.1;XP_054975311.1;XP_054975312.1;XP_054975332.1;XP_054975314.1;XP_054975326.1;XP_054975315.1;XP_054975328.1;XP_054975316.1;XP_054975330.1;XP_054975319.1;XP_054975…	24.4646	22.6696	23.5533	24.4691	22.85	23.2651	23.7041	24.2035	23.8248	22.1066	22.7442	23.4437	24.2714	23.267	21.8073	21.8196	23.1972	21.5229	22.7639	22.2389	23.3401	23.2287	23.1062	23.3015
XP_004616506.1	20.8577	19.594	20.7745	20.7566	19.064	19.2646	20.1887	20.4409	20.2999	21.8474	20.0948	20.4877	20.8003	19.4944	20.6318	20.2257	19.2837	20.015	19.5314	19.533	18.2733	20.0204	20.4434	19.8094
XP_054991648.1;XP_054991647.1;XP_054991645.1;XP_054991644.1;XP_054991643.1;XP_054991642.1;XP_054991641.1;XP_054991640.1;XP_004616527.1	20.2856	19.0524	20.5343	20.6554	20.2446	18.8686	19.3777	18.4041	19.7424	19.6992	19.8996	20.2408	19.7057	18.6384	20.9214	21.3114	19.8271	20.5495	20.4916	20.5384	18.779	19.5764	18.7894	19.2534
XP_054991487.1;XP_054991486.1;XP_004616528.2	23.8979	23.3406	24.8943	25.5	24.9772	23.2738	23.3318	23.711	23.5008	23.4122	24.0547	24.6607	23.8485	23.5732	23.0692	23.9225	24.6964	23.6437	25.1127	23.6951	24.4379	25.1084	24.1273	24.8012
XP_004616530.1	21.1546	19.8427	21.2948	22.2546	20.9987	18.6191	19.3869	20.6957	19.0764	20.4124	21.6671	22.0105	21.5	20.2896	18.9165	20.441	23.1407	19.7616	22.4529	20.5098	21.6256	22.8653	19.763	20.6248
XP_004616540.2;XP_004616539.2;XP_004616538.2;XP_054990703.1;XP_054990702.1;XP_004616537.2;XP_054990704.1	22.516	21.3145	20.8918	22.8329	21.6911	19.3681	19.438	21.239	20.9441	17.9154	21.9987	21.033	21.3205	21.5385	22.2963	21.684	22.7219	21.0882	19.1189	22.3944	22.2256	22.3314	21.2705	22.2065
XP_004616543.1	24.1743	23.6074	24.4915	24.9861	24.9971	23.9869	23.9645	24.3255	24.3146	23.5284	24.2905	24.1886	23.7436	24.3832	24.2459	24.7053	24.3936	24.199	24.5273	23.7699	24.7581	24.6109	24.8957	24.3108
XP_004616556.1	24.6914	24.1748	25.3902	25.8374	24.8547	24.6122	25.0719	25.1076	23.8891	23.7047	24.6923	25.5716	25.2818	24.2351	24.5838	23.9955	25.9465	24.429	24.3695	25.7009	25.4737	26.3955	24.5837	25.1309
XP_054978177.1;XP_004616569.1	21.2941	21.0562	22.0968	21.4523	21.0968	20.7291	21.4388	22.328	19.5964	20.8771	20.9548	21.717	22.1225	21.8349	22.1839	22.8437	21.9931	18.0184	20.9611	18.5117	22.5488	20.9792	22.914	22.4353
XP_004616615.1	19.1597	20.2649	22.9335	22.1707	22.4415	18.5661	21.5646	19.6731	22.4111	22.3454	22.0418	21.1805	22.4621	22.4065	21.1913	20.239	19.3467	18.8544	18.7305	18.382	20.4199	19.3555	22.5606	19.1831
XP_004616628.1	22.4556	22.3077	22.5261	21.9275	21.7485	22.826	22.0317	22.1207	22.5211	22.4147	23.2977	22.8383	22.3864	22.292	22.326	21.8406	22.0336	21.7468	22.2846	21.4419	21.779	21.4035	22.7323	20.8907
XP_004616660.1;XP_054975131.1;XP_054975130.1;XP_054975129.1	25.8712	25.3251	25.8303	25.3917	25.6514	26.0843	25.5764	25.3852	26.2047	26.5796	24.7843	25.1302	25.0159	25.4781	24.9173	26.2179	24.1878	25.2088	24.8219	26.3568	25.029	25.2339	26.3861	25.706
XP_054982490.1;XP_004616663.1	26.0463	25.683	26.363	26.271	25.8339	25.2309	24.9836	26.1904	24.9578	25.318	26.217	26.6273	26.3416	25.8529	25.3721	25.4737	26.208	25.9786	26.456	26.4135	26.6806	25.9859	25.6425	26.6697
XP_004616664.1	22.0745	21.9537	24.1032	21.9362	21.4767	21.0934	21.6816	22.8065	23.3408	22.5621	22.2676	22.9571	22.9444	20.5885	23.1183	21.6631	18.8753	19.1176	22.1932	20.4839	22.2016	23.5138	22.867	22.6163
XP_004616666.2	26.8249	25.8844	26.9778	26.2977	26.379	26.0876	26.1799	26.4765	26.5043	26.2146	26.6403	25.8848	26.4499	25.483	26.0612	26.4479	24.9572	26.0935	25.9578	26.5192	25.9578	26.4673	26.979	26.6022
XP_054985132.1;XP_004616669.2;XP_004616667.2	21.5829	18.6964	19.5002	21.438	21.4668	21.6603	21.3851	21.6753	21.7651	22.0748	21.3346	20.4995	20.1693	19.9267	21.5028	21.438	20.9433	21.0468	18.6262	21.2816	19.6836	20.5766	21.5001	21.4424
XP_004616713.1;XP_054996025.1	24.3242	24.1341	24.5868	24.3608	23.8983	23.7482	24.446	24.9247	23.6706	22.9175	24.1437	23.8312	25.0155	23.8708	23.8729	24.2419	23.9777	24.2924	24.2091	23.5205	24.2648	23.3848	24.0309	24.355
XP_004616729.3	19.3567	19.8914	19.5431	19.6144	20.1968	18.4066	20.6976	19.3582	20.9365	19.035	21.2146	18.6582	20.236	18.7294	19.6039	19.9832	22.5095	18.7653	19.6389	20.9666	19.4115	21.9365	21.6793	21.2187
XP_004616742.1;XP_004616748.1;XP_054980864.1	19.6081	18.658	18.3919	21.881	21.4991	19.9699	18.8759	19.9704	19.0804	18.0396	18.1827	19.3033	19.7682	19.7	18.769	19.8397	19.1603	21.9947	19.8698	22.0218	22.5213	22.3207	21.5779	22.034
XP_004616751.1;XP_054980870.1	27.8077	26.5904	28.0805	26.817	26.6939	26.7187	26.359	26.0344	26.7184	27.4386	27.0203	26.8879	26.517	25.6593	27.651	27.4156	25.8629	26.7836	26.8787	26.9928	27.7304	27.1537	26.9004	26.752
XP_004616753.1;XP_004616755.1	24.3322	23.0716	24.5927	23.4136	23.2311	23.6881	22.9923	22.496	23.4161	23.5593	23.2925	23.9063	23.2105	22.536	23.9368	23.7018	22.3529	22.6596	23.1625	23.0019	23.2807	23.3192	23.614	23.4112
XP_054983857.1;XP_054983856.1;XP_054983855.1;XP_004616758.2	22.0957	21.9225	21.919	22.0562	21.7698	18.8854	20.7373	21.1868	22.6319	22.3957	22.6365	21.8799	22.0716	18.5792	21.1297	19.2234	21.5823	21.851	21.4282	21.8771	19.9474	19.9972	21.645	22.8012
XP_004616761.1;XP_054975898.1;XP_004612043.1	22.8504	21.3858	23.3923	22.3036	21.7136	22.6717	22.4388	23.0363	23.0521	22.8891	23.3717	23.0357	22.966	22.3494	22.8361	23.1314	21.5096	22.3862	22.6072	22.8442	22.5533	22.159	23.4055	22.7931
XP_054983508.1;XP_054983507.1;XP_054983506.1;XP_054983505.1;XP_054983504.1;XP_054983503.1;XP_004616762.1;XP_054983511.1;XP_054983510.1;XP_054983509.1	23.1498	23.9515	24.3873	24.5906	24.2603	23.2942	23.6777	23.7089	23.87	23.4812	24.0464	24.3987	23.8776	24.5395	23.4931	23.4324	24.1216	23.1605	24.2696	23.8398	23.7506	24.3364	23.8843	24.7591
XP_004616856.1	21.8114	20.2434	21.6932	19.4074	19.2	21.5165	21.3605	21.7802	22.1228	18.8826	22.3095	21.0465	21.5042	19.7386	20.4413	19.4069	19.134	18.3927	21.4038	20.4323	20.2029	20.9226	21.824	20.5897
XP_004616875.3	25.982	25.834	25.7592	24.8398	24.7544	26.2695	26.1602	26.3559	26.1101	25.4756	26.5408	25.9902	25.8388	25.5714	25.531	24.9011	24.8502	25.709	25.4251	24.971	25.1039	24.3531	25.7456	24.9062
XP_004616955.2	19.8127	20.231	21.1933	20.1411	19.1909	21.827	21.3197	21.1827	20.4591	20.7942	20.1269	20.5694	18.8704	20.593	21.2339	20.727	19.3764	20.2054	20.2278	19.7744	20.5425	19.6952	20.7626	21.0441
XP_004616981.2;XP_055001285.1	19.2588	18.8096	20.274	21.0166	22.2355	17.9976	20.2639	19.261	19.9074	17.7155	19.5849	20.0784	19.5228	19.8216	19.1389	20.6309	23.2312	20.6518	22.4837	18.5905	21.5742	20.9104	19.3386	20.1195
XP_004616982.1	24.6778	24.4296	24.3606	24.7778	24.4783	24.8264	24.9763	25.2536	25.2053	24.3076	24.4043	24.6881	25.3567	24.399	24.7277	23.983	23.9369	24.3238	24.4459	22.9721	23.0575	23.6874	25.1099	24.1825
XP_055001560.1;XP_004616991.1;XP_004616990.1	22.1686	19.1149	20.9279	19.4848	20.6497	20.3856	20.8746	20.4642	20.4743	20.2351	20.2644	20.2213	20.8781	21.7689	19.8904	19.445	19.2366	18.7215	20.0744	18.5964	20.5814	20.3914	20.3644	20.9538
XP_004616996.1	25.1618	23.7633	25.4137	25.1061	24.7011	23.3623	24.7174	25.1309	24.3698	23.5629	24.4543	24.4312	25.0035	24.0802	24.2933	24.3463	24.4228	24.0478	24.7128	23.0536	24.2527	25.0276	24.7726	24.4568
XP_004617067.2	18.6649	18.3319	20.183	19.7151	20.3042	19.5482	20.42	20.3435	20.6895	19.4079	20.5111	19.8057	20.2976	20.4823	20.4065	21.2482	21.521	19.6773	21.502	21.5461	21.4584	20.7161	19.7524	21.5192
XP_004617160.1	23.5792	23.3582	24.8221	25.1323	24.6368	23.5201	23.4472	24.1592	23.852	23.4368	24.5853	24.3969	24.3569	23.8876	23.912	23.7721	24.1781	23.6332	24.3787	24.0339	24.1922	24.11	24.0887	24.5061
XP_054994693.1;XP_054994692.1;XP_004617161.1;XP_054994694.1	24.052	23.0713	24.4554	23.6339	23.6007	23.814	24.5801	23.8723	24.6216	23.7777	23.6971	23.6292	23.9938	23.1637	22.8262	22.8247	22.8021	23.2231	22.9903	22.8202	22.3706	22.5613	22.9641	23.2501
XP_004617168.1	22.423	20.1697	21.8794	20.8942	21.0387	20.9521	21.2487	21.2938	21.621	21.0675	21.1465	21.1942	20.8656	20.1318	19.807	19.5533	19.3272	18.9848	20.2406	20.2542	19.6186	19.775	20.0768	18.8116
XP_004617191.2;XP_054979161.1;XP_004616767.2;XP_012788902.2;XP_054984081.1;XP_012787944.1;XP_054974698.1;XP_004607517.2	23.3621	23.4728	24.1299	24.8064	24.2782	22.9101	23.4162	23.1102	22.7897	21.626	23.4749	23.9593	23.6791	23.4871	23.3416	23.3373	25.0515	23.4519	24.6535	22.9446	24.67	24.5054	23.7653	24.8876
XP_004617284.1	19.1695	18.1828	19.8038	21.0633	19.6356	19.3265	20.0299	19.9495	20.5078	18.5798	20.3451	20.8102	21.1134	19.2677	20.6619	19.5497	20.4479	18.7761	18.9513	19.5277	21.3031	21.044	20.9188	19.8513
XP_004617310.2	21.1844	19.8134	19.8341	23.0033	22.0021	18.1936	18.7614	21.8517	20.2826	20.0998	20.3466	20.4857	20.3034	19.1922	18.6425	19.5757	20.2645	19.9471	19.9503	18.862	20.1547	22.4485	21.6764	21.0209
XP_004617339.2;XP_054992734.1	24.7031	24.1792	25.6075	25.135	24.7078	24.998	24.4514	25.101	24.3173	22.3467	24.2247	24.431	24.4483	23.9744	25.0464	25.6206	24.6085	24.2612	24.9736	24.9004	25.0135	24.7512	24.8746	25.6114
XP_004617366.1	26.9971	27.6996	27.5899	25.876	27.2342	26.9418	21.139	26.8771	27.5899	27.8503	27.2243	26.1842	26.6378	26.0551	27.0145	26.3153	25.8097	25.1217	25.7019	25.9267	24.848	27.9873	26.3279	25.1665
XP_004617420.1	22.8334	22.0176	22.6466	22.6541	22.497	22.5468	22.8845	23.1204	22.9595	22.1674	22.19	23.1798	22.8496	22.7161	22.5683	22.8271	22.5235	22.303	22.3631	21.8421	22.6135	22.4841	23.0256	22.9613
XP_004617433.1;XP_054992686.1	22.6442	22.1972	23.887	23.3598	23.2959	21.543	22.8165	23.1099	22.8767	22.2169	23.2781	23.3062	23.6239	23.2497	23.3656	22.8479	22.8915	22.9044	23.3557	21.7624	22.9512	23.0739	23.8602	22.9165
XP_004617468.2	24.0657	23.1014	23.7219	23.0126	22.7361	22.996	23.598	22.845	23.02	21.6345	23.085	23.5297	22.7491	22.6032	23.4072	23.2888	21.5045	22.5397	22.7767	22.6731	22.2779	22.7823	23.0572	22.8897
XP_004617532.2	24.9727	23.6366	24.8205	24.9692	24.0062	24.4866	25.2051	25.2134	25.3026	25.1477	25.7833	24.6516	25.1989	24.8102	24.4629	24.0741	24.5454	24.3174	25.1432	25.2711	24.5095	25.5947	25.2093	24.2172
XP_004617585.2	21.7148	21.4869	21.9124	21.2367	21.6368	22.0406	21.8423	21.9525	21.9616	22.8157	23.0975	21.9595	22.3312	22.3746	22.1942	21.8449	21.7761	21.5565	22.7654	21.7683	21.9084	20.3572	23.0885	21.4112
XP_004617600.1	19.4007	18.5485	21.2157	22.75	20.5129	20.486	20.8942	20.4221	20.4808	19.5037	20.3141	20.1618	21.3816	20.2064	20.2434	20.4561	17.7949	19.6504	20.0973	18.8896	19.8364	21.606	20.2578	20.4939
XP_004617607.1;XP_054997818.1	21.382	19.9002	20.6645	19.6133	18.8848	21.4302	22.1292	21.2966	22.0107	21.3789	22.5485	21.7077	19.2697	21.4411	21.741	21.7493	20.9234	19.205	21.5162	19.3203	20.6928	19.3679	21.8039	21.2809
XP_054987342.1;XP_054987341.1;XP_004617617.1	23.2933	22.7464	22.3881	21.2441	23.0337	22.5388	22.1785	22.575	21.5629	21.216	21.6989	23.1746	22.6098	22.5615	22.6911	22.0795	22.0349	22.1305	22.2956	22.914	22.9382	22.4634	19.9186	22.2413
XP_004617643.2	25.5016	24.8435	25.7531	26.3627	25.846	25.7308	25.7711	26.1581	25.6068	25.6263	26.6029	26.9542	26.8214	26.0839	25.7547	26.0924	26.7038	26.1462	26.8608	25.8567	25.988	26.3403	26.3165	26.4991
XP_004617657.1	26.8536	25.8346	26.4134	25.3644	25.9841	26.4939	26.8886	26.7985	26.002	25.9677	26.7949	26.6328	26.6281	26.1507	26.8338	26.3913	25.3281	26.6303	26.3716	28.0748	26.0941	28.9074	25.5702	26.5664
XP_004617668.1	23.679	22.5857	24.1555	23.3919	22.6005	22.9122	22.7686	22.4855	22.8685	22.2281	22.4668	23.0146	22.4736	21.8685	22.8923	23.2842	22.2629	22.605	23.0495	22.9694	22.872	22.9081	23.4434	23.4721
XP_004617673.1	26.8264	26.7567	27.6558	27.3278	27.276	26.8404	27.124	27.2154	26.7972	26.9995	26.8956	27.1714	27.4471	27.1252	26.7806	27.4245	26.9027	27.1048	27.3818	27.9452	27.0232	27.2546	27.414	27.4004
XP_004617680.1	24.6023	23.3644	24.4774	24.681	23.7775	23.2401	23.8266	24.2618	23.9191	23.248	24.0288	24.4967	24.356	23.8126	23.969	23.4211	23.7252	23.6256	24.2056	23.6026	24.0686	24.1362	24.066	24.0022
XP_004617687.1;XP_054998463.1	20.5198	19.0286	18.5535	20.7101	19.6593	19.6071	19.9728	20.278	19.7215	19.4281	20.9336	18.6127	20.5737	18.5048	20.0224	19.429	19.6818	18.7666	17.7647	21.3372	18.3041	18.4768	23.7054	18.5209
XP_004617708.1	24.8719	25.5814	24.7441	25.6256	24.3648	25.4287	25.2728	25.5711	25.4766	24.9792	25.4124	24.6481	24.7968	24.778	24.8385	24.1951	24.1652	24.392	24.3904	24.0781	23.4853	24.2061	24.0945	24.5818
XP_004617724.1	23.0918	23.0812	23.0155	22.9724	23.3343	22.8417	22.1364	22.2682	22.2379	22.8496	22.0041	22.8815	22.5518	23.0151	22.7462	22.6722	20.3404	22.8055	21.6522	22.4872	23.4344	22.3287	22.1924	22.8682
XP_004617727.1	25.5922	25.2959	25.9156	25.5659	25.0896	24.6469	25.6385	26.2224	26.1085	25.704	26.3016	25.7475	25.8694	25.9298	26.2795	25.0863	25.1887	25.2963	25.8297	24.383	24.9694	25.0034	26.4309	25.2076
XP_004617766.1;XP_054983618.1	23.7934	23.9335	24.5885	24.4109	23.2319	24.6891	25.8017	25.6942	25.264	24.1625	24.7781	24.6237	25.5417	25.0682	24.3531	22.8832	24.0363	24.6855	24.9981	23.6283	23.6279	23.1925	24.8439	23.9904
XP_004617853.2	24.9939	25.2423	25.1052	25.2736	25.1651	25.415	25.5298	25.3739	25.1363	24.9112	25.3624	25.0632	25.2058	25.0113	25.2097	24.9123	25.2205	25.3664	25.5569	25.6742	25.0121	25.373	25.0462	25.473
XP_004617930.2	30.8288	30.5778	30.7755	30.097	30.2996	30.9394	30.6826	29.9505	31.0318	31.5727	29.3459	29.5616	29.6073	29.6783	30.1402	30.8595	29.3399	29.8523	29.5371	31.2587	30.2207	30.0184	31.1022	30.2125
XP_004617950.2	22.8591	24.8846	24.8954	23.992	22.7283	24.3681	22.3783	23.0228	22.4627	23.8052	23.1769	24.0786	24.0036	22.8081	23.7854	22.5972	23.6655	21.2735	21.5261	23.2414	22.7926	22.674	24.4886	22.7522
XP_004617972.2	20.6968	20.5825	19.4556	18.8547	19.4705	23.1819	26.1409	24.2372	25.104	22.1426	23.8499	24.4315	23.6948	23.3052	23.3144	23.3669	24.6542	21.9857	22.9041	23.3178	23.8793	24.4602	24.2089	23.3746
XP_004618039.2	23.733	23.9399	23.9638	23.5565	24.0093	24.279	24.5447	23.3063	24.2017	25.1625	24.714	24.5543	24.5763	24.5025	25.0624	24.4479	23.6611	24.1695	24.1736	24.5109	23.9887	23.5858	25.4272	24.0004
XP_004618043.1	21.8789	21.74	22.5542	22.6995	23.0409	21.132	22.4228	21.899	22.3683	20.6778	21.2567	21.8886	21.8712	22.2492	21.2475	21.0815	22.854	20.723	22.0773	19.9678	21.6115	21.7944	22.1655	21.9475
XP_054989830.1;XP_004618049.1	20.5749	21.294	20.987	22.9111	22.3837	20.4629	19.1114	21.4774	22.0092	20.132	22.1525	21.1949	22.3431	19.9231	21.1738	20.4596	22.1864	19.0396	21.5382	21.4642	20.8051	21.9583	22.1877	20.8094
XP_054985950.1;XP_054984896.1;XP_004621951.1;XP_004618109.1;XP_004618107.1;XP_054985072.1;XP_004611559.1	26.939	24.4708	24.5532	24.4702	23.606	24.2312	27.555	25.4881	24.9106	24.2372	25.6185	24.5091	25.4822	24.4929	24.6481	23.1994	23.1987	24.6073	24.4854	22.5311	24.2097	23.279	23.1576	24.196
XP_004618108.1;XP_054985949.1;XP_054985948.1	25.5313	23.7873	26.6067	24.6485	25.3575	25.8517	25.0631	24.9387	25.1055	25.5963	26.5705	24.1795	24.2447	22.9723	25.924	25.3632	25.9606	24.87	26.264	24.405	26.3007	23.0473	24.6929	25.6107
XP_004618113.1	19.8845	19.671	20.7593	19.2796	20.8245	20.3586	21.6273	20.3237	22.0802	21.2639	19.3466	19.8407	21.7258	20.7331	20.4489	19.7042	20.0554	19.4071	19.5893	19.3608	20.4919	19.3143	20.0418	18.7537
XP_004618148.2	26.2042	26.0783	27.0923	26.5979	26.549	26.3182	26.4546	26.07	26.4512	26.3182	26.3736	26.4866	26.0914	25.6546	25.6485	26.357	25.5163	25.4571	26.0128	26.7922	26.2005	26.0107	26.4795	26.6602
XP_004618149.2	21.6726	22.4387	23.5437	22.4775	22.4388	23.3697	23.2463	23.5899	23.3503	23.1498	22.908	23.4383	23.5743	22.949	22.9123	23.4497	21.6353	22.6789	21.6244	22.4974	22.5758	18.4173	23.6252	22.0963
XP_004618152.2;XP_054986340.1;XP_054986342.1	20.9188	21.1605	19.6355	21.216	19.6189	21.7516	21.2312	22.0127	21.9512	19.4789	20.7911	20.7671	19.3912	19.7824	19.6937	19.7788	20.0804	20.3232	19.5324	20.9132	20.4979	21.618	21.5384	19.5026
XP_004618169.1;XP_054974513.1;XP_054974499.1;XP_004608468.2;XP_054974491.1	25.9083	25.2088	26.1072	26.216	25.9272	26.2398	25.9444	26.6665	26.575	25.8202	26.9648	26.6278	27.1099	26.92	26.9604	26.6988	27.0764	26.0547	27.4629	26.9739	26.7484	26.8533	26.8138	27.229
XP_004618176.2	22.9656	23.4294	23.2498	22.6286	23.5237	22.0495	21.3177	23.4112	23.019	23.6804	24.66	24.1855	24.9347	23.4111	24.1435	24.0868	23.9188	24.1145	25.1164	24.5174	23.7854	24.1952	25.542	24.6336
XP_004618217.2;XP_054989508.1	19.4215	19.4178	20.1739	20.6163	19.7743	19.9139	18.8238	18.7662	19.7598	19.8035	18.4547	19.9503	19.2543	20.4784	19.5981	19.7548	21.7768	20.8242	19.7467	20.7526	21.6825	22.8435	22.6652	21.4202
XP_004618228.1	24.6835	23.8173	23.5919	22.9443	23.2094	23.5663	24.1257	24.4548	23.3269	23.0011	24.246	24.07	23.6607	24.2571	25.3928	23.8638	22.9161	23.5405	23.6131	22.9763	23.368	23.0207	24.133	23.3715
XP_004618229.2	22.0461	18.7331	19.4144	18.9453	18.066	19.591	18.744	22.29	19.8506	22.2633	23.0475	22.0159	19.9412	21.0031	22.6692	22.4918	22.7	21.8915	23.3729	22.3346	23.2721	22.0342	23.3388	22.0997
XP_004618256.1;XP_004618255.1;XP_054982232.1;XP_004604849.1	22.6335	23.2953	23.5686	22.6484	22.4476	23.1634	24.1803	23.9188	24.1466	23.603	24.3141	23.6975	23.6166	23.4169	23.4368	22.9849	22.1918	23.358	23.1819	22.578	22.7	22.4956	23.2097	22.9284
XP_004618268.1	22.1924	22.2739	22.2103	21.1469	23.1854	22.3565	22.6887	22.84	23.0079	21.1828	22.1117	21.772	21.8735	22.1381	21.2567	20.628	22.3785	22.7427	21.7433	21.0049	21.9552	24.4205	21.5185	22.0532
XP_004618297.1	20.411	19.8903	20.4068	20.0784	20.6969	20.9293	20.4824	20.5556	21.9131	23.5326	19.3744	19.8008	19.8249	19.8858	20.6103	20.2755	19.6546	19.8659	18.9734	20.3451	19.8725	20.1215	22.6532	20.1139
XP_054999366.1;XP_004618299.1	33.6521	33.7538	33.3855	32.6907	33.7365	34.5624	34.2914	33.3239	33.8326	34.8523	32.5348	32.9524	32.9775	33.6116	33.0045	33.9971	32.53	33.1383	31.8709	33.7518	32.2215	33.0635	34.165	33.0841
XP_054998796.1;XP_004618316.1	22.4696	20.011	22.5124	19.3953	19.1574	22.674	19.0627	21.1805	20.7082	21.4496	21.0366	22.0623	20.9074	19.8617	21.606	20.0174	18.6995	19.6325	19.5593	19.8487	19.796	20.4822	20.6789	19.4308
XP_004618427.2;XP_054987722.1;XP_054987716.1;XP_054987710.1;XP_054987704.1	23.9958	23.3461	24.6394	24.7887	23.8894	23.1022	24.3401	24.3438	24.126	23.0409	23.5289	23.3453	24.2936	23.3111	23.7723	22.9683	22.6864	23.3158	23.461	23.5438	23.5473	23.9649	24.126	24.1909
XP_004618436.2	20.2033	20.3257	18.2495	18.8771	19.4478	22.7753	20.9094	20.3198	19.1268	18.3623	21.5205	19.0292	20.4275	19.2247	19.1982	20.2148	19.3712	19.0998	18.7629	19.7304	19.8495	21.2495	20.4998	19.6611
XP_004618455.3	21.7552	22.1752	22.1705	21.7897	21.0359	20.8606	18.9337	22.1527	21.8979	21.5203	20.5448	21.7179	21.704	21.5364	21.6252	21.0852	21.7248	20.7139	21.4184	22.6197	23.1568	21.8917	22.9608	22.4458
XP_004618466.1	18.215	19.5349	19.9019	18.7293	20.0386	19.6135	19.9136	19.8791	19.7232	20.2835	19.6539	21.8115	21.2262	19.8885	23.7611	23.0254	20.1152	24.4035	24.2528	22.8042	21.9243	22.9125	20.8689	23.3818
XP_004618467.2	21.2652	18.5583	21.5574	19.6683	19.9991	20.7987	21.3141	21.0103	21.6337	21.2533	22.8166	20.4474	21.3579	21.7772	20.6565	19.7178	20.9018	20.3313	20.6409	21.453	21.0722	19.6785	22.0748	21.1492
XP_004618483.1;XP_054998180.1;XP_054998179.1	26.1215	25.2275	25.7423	25.2557	25.3401	25.6931	26.2561	26.3924	26.2223	25.2779	25.9684	25.5319	25.8971	25.5288	25.4668	25.0212	25.0497	25.5459	25.4743	25.5765	25.8383	25.5857	25.6674	25.7774
XP_004618490.1;XP_054992740.1	26.0243	26.0745	26.6523	25.539	25.9068	26.1622	26.3789	26.6559	25.609	25.8431	26.5407	26.8644	26.3726	25.0648	26.3228	25.5218	25.1106	26.1673	25.656	27.8736	25.5094	24.0791	26.1341	25.1316
XP_004618492.1	23.3013	23.7563	23.8357	22.943	23.6126	23.3781	24.317	23.7327	24.1259	22.5288	24.1548	23.6579	23.8543	23.7725	23.4081	23.3164	24.5498	23.1089	23.4761	23.6491	23.4842	25.2138	23.1803	23.7166
XP_004618496.1	22.1378	18.8879	21.4567	21.2719	19.9705	20.2974	21.4298	21.9604	21.5495	19.1067	21.4567	21.2755	19.4635	21.5708	21.6356	20.8596	20.9739	21.8475	21.1452	19.2783	20.7685	20.8679	21.764	20.6521
XP_054999150.1;XP_004618501.2;XP_054999149.1	18.7041	18.1846	19.4229	20.7116	20.3192	18.8272	19.2855	20.9924	19.7961	19.6	21.2249	20.7373	19.2134	19.3297	21.1183	20.6532	22.569	18.9689	21.2243	19.0746	20.9649	19.3742	18.9437	20.3621
XP_004618505.2;XP_012790418.2	22.0702	22.1679	18.9513	22.4255	20.1913	18.3832	22.0449	20.4319	19.7348	18.7959	19.2699	22.3638	22.247	22.0496	22.1703	21.5284	21.8936	18.9092	22.0267	23.36	22.9825	22.7623	23.0135	22.3714
XP_004618506.1	18.8682	18.2254	19.7874	19.7264	20.9157	19.0756	19.4529	19.2852	18.9305	23.0439	21.0397	20.7407	20.8353	21.0785	21.0391	21.0895	20.8619	20.9993	20.9513	19.353	20.1992	21.0129	20.3216	20.5111
XP_004618507.1	22.9793	18.6838	19.7012	21.3976	19.216	21.6106	21.8178	21.8793	22.3946	21.6969	22.6676	21.5189	19.149	19.1529	21.5919	18.7941	21.5452	19.3139	21.5395	19.8062	21.1754	18.9871	19.7798	19.0638
XP_004618537.1	22.4811	21.7719	23.0401	23.7117	22.8396	22.1314	22.0055	22.1916	22.3521	22.2464	23.1826	23.7984	23.1975	23.2369	22.0641	22.5478	23.6757	22.4276	23.4846	22.8029	22.5373	24.1377	22.95	23.0992
XP_054998181.1;XP_004618544.1	23.7339	24.0767	24.397	24.4028	23.7406	23.9328	24.4934	24.3357	24.3024	24.1591	24.6755	24.4744	24.7856	24.3511	23.9201	23.5586	23.6973	24.1238	24.1308	23.8658	23.1423	23.4519	24.3433	23.1633
XP_004618621.2	26.2989	25.8756	26.73	26.3545	26.2237	27.1588	28.3228	27.4496	27.5965	27.7614	27.6385	27.7838	27.6766	27.9389	27.4918	26.8945	27.4104	27.2266	27.5901	26.3811	26.3825	26.5102	26.8332	26.5876
XP_054978573.1;XP_054978572.1;XP_004618665.3	26.288	24.941	26.7542	25.3004	24.1743	25.8114	26.0549	25.5615	25.8723	26.7345	25.5698	24.8278	25.0565	23.8475	25.6515	25.3619	26.5311	24.7312	26.2164	25.1875	25.2309	25.4442	25.1082	25.9255
XP_054981948.1;XP_054981945.1;XP_054981944.1;XP_004618686.1;XP_054981942.1;XP_054981941.1;XP_054981939.1;XP_054981938.1;XP_054981937.1	25.1366	24.4814	25.25	24.5849	24.5909	24.6089	25.2086	25.7838	25.7703	24.3798	24.8994	24.6698	24.9505	24.6349	24.5398	23.9083	23.8623	24.6247	24.1768	24.9418	24.4216	24.5074	25.4199	24.4482
XP_004618689.2;XP_054981563.1	19.3624	18.1607	21.5198	20.9301	19.0598	19.5963	22.5954	20.1367	21.5419	19.7719	21.8354	22.0312	19.3777	20.4633	20.275	20.2203	20.1797	20.1451	20.4316	20.0904	21.0353	20.9705	21.6833	21.7873
XP_004618698.2;XP_054983015.1;XP_054983016.1;XP_054983017.1;XP_054983018.1;XP_054983019.1;XP_054983020.1;XP_054983021.1;XP_054983010.1;XP_054983014.1;XP_054983011.1;XP_004618701.2;XP_054983022.1;XP_054983012.1;XP_054983024.1;XP_004618699.2;XP_054983013.1;XP_054983025.1;XP_054983026.1;XP_054983027.1;XP_054983028.1	23.1049	20.8919	23.4148	25.3088	23.2247	21.5667	21.5476	22.7472	21.6428	22.1832	22.186	23.8958	23.6823	22.5679	24.5111	23.3115	25.5724	23.5088	24.4775	22.9059	24.7096	24.9015	23.7731	24.8639
XP_004618708.1	23.6482	22.7381	24.1745	24.7319	25.3852	23.4347	23.9265	23.8412	23.2765	22.9243	22.5839	24.0489	23.7347	23.9055	23.8855	23.5258	25.8059	24.0136	24.5446	24.9536	24.7721	25.0007	24.3898	24.7967
XP_054981854.1;XP_004618714.1	25.6075	25.1174	26.3382	25.6304	25.4454	25.003	25.9324	26.2496	25.9106	25.1865	25.7599	25.9158	26.496	26.3019	25.9862	25.5229	25.432	26.0109	25.7648	25.1937	25.2038	25.6371	26.1102	25.4301
XP_054985260.1;XP_054985259.1;XP_054985258.1;XP_004618725.1;XP_054976898.1;XP_054976897.1;XP_054976896.1;XP_004612497.1;XP_054976900.1;XP_054976899.1	23.8195	22.91	25.1361	22.9325	20.0061	19.4379	23.364	23.5694	24.5656	18.2289	24.5416	24.9103	24.4147	18.8586	23.3181	22.4978	18.8964	23.5167	24.5681	22.7237	22.9752	19.3353	24.1942	23.0814
XP_004618806.2	23.5614	21.739	22.2025	21.1847	21.6857	20.5148	22.6084	21.9146	19.2335	23.0062	21.4224	21.7668	18.7924	21.4987	24.048	24.9061	21.5786	21.9697	22.2643	25.1197	23.7781	23.6972	23.26	23.5095
XP_004618917.1	19.3247	21.4845	21.727	21.6197	18.1965	21.6613	22.1851	22.5095	23.5181	23.2281	22.7884	21.5729	21.4479	22.4899	22.2618	21.661	20.9949	21.927	21.5965	22.0084	19.4744	21.5809	22.3618	21.9297
XP_004618969.1	23.781	21.663	25.0376	25.738	25.2427	23.4026	23.6865	24.4973	24.0933	23.688	24.6204	24.9274	24.6346	24.6281	24.9881	25.1622	26.2188	24.7506	25.7366	25.2217	24.8379	25.5598	24.6819	25.788
XP_054976404.1;XP_054976403.1;XP_004618971.1	22.5738	21.3328	24.3083	24.6579	24.3062	22.7798	22.5081	23.742	24.2553	23.4891	24.3434	23.9611	23.8856	23.597	24.1296	24.4248	25.1039	23.9698	24.7726	23.5564	23.8417	24.001	24.101	24.6168
XP_004618986.1;XP_054978626.1;XP_004618987.1	23.4096	23.2243	24.5467	24.2925	24.5649	23.2288	23.99	24.3288	24.3374	24.1024	24.9486	24.8846	24.6884	24.5791	24.7941	22.8735	24.9118	24.9669	25.1142	24.2733	23.8862	24.9644	24.3421	24.108
XP_004619014.2	22.5706	19.9074	22.4332	22.2087	21.6193	21.8638	21.8695	21.0102	20.8438	21.0746	22.2207	21.633	21.9356	20.6731	21.6154	19.2764	20.63	20.414	18.9404	20.8539	22.4974	19.3373	22.2996	21.6446
XP_004619072.2	24.0936	21.5517	23.7814	24.5846	24.2236	22.5088	22.8004	22.931	22.012	22.1374	24.5732	24.9021	24.5269	23.0485	23.8533	24.3155	25.5362	23.9641	24.9691	24.7639	24.9653	25.2538	23.7867	24.8512
XP_004619073.1	26.3296	25.6182	26.7075	26.8825	26.2128	25.8632	26.498	26.337	26.5842	26.1169	26.8496	27.0684	26.9189	26.6958	26.6755	26.5416	26.6112	26.4991	26.859	26.3292	26.7705	26.92	26.5275	27.0049
XP_004619129.1	21.215	20.8494	20.0003	19.1587	19.824	21.4712	20.3671	19.4321	21.372	21.2226	17.6277	20.3505	18.8761	20.5023	19.1977	21.2997	17.2831	20.7253	19.5392	22.1788	21.6381	21.4671	22.4288	21.001
XP_004619141.1	19.2071	17.8537	21.6675	21.599	21.5168	17.675	19.1994	20.236	18.6406	19.8046	21.4799	21.3266	21.3727	19.4766	21.5296	20.3929	21.4337	20.1612	20.6182	19.8853	21.2453	20.2835	20.2986	20.802
XP_004619144.1	24.1138	24.1859	23.91	24.0184	24.0939	24.3788	24.0096	24.7835	24.2777	24.0586	24.6377	24.4709	24.5071	24.7541	23.8118	23.9909	24.6884	24.5067	24.0483	24.5595	23.2743	23.7414	24.2233	23.767
XP_004619194.1;XP_004619193.1;XP_054994347.1;XP_054994346.1	21.5121	20.9421	22.1581	21.2084	21.571	20.6572	21.8486	21.4379	20.6216	20.5169	20.2605	21.6136	21.7477	19.6883	21.1035	20.1722	20.2447	20.4397	20.3274	17.8104	22.1707	20.1566	22.5934	21.4908
XP_004619199.1	19.5393	19.8931	19.4791	19.353	20.5998	18.1998	19.831	20.454	20.9642	18.0263	19.7617	19.1425	19.5524	19.8166	18.8651	19.8129	19.4123	19.6236	19.697	18.8401	20.4617	19.0989	19.6448	19.8829
XP_054996440.1;XP_004619228.2	18.6327	19.9671	21.8495	22.9541	20.7714	18.4459	19.882	19.7466	20.6377	19.5729	21.5484	21.8683	20.3207	19.5359	20.3067	19.7988	22.56	21.3624	23.3809	19.4335	19.9658	22.2554	21.848	21.7743
XP_054994509.1;XP_004619254.1	23.3403	22.4854	23.627	22.4263	24.7978	22.9172	23.5394	22.5355	22.858	20.9426	23.5035	23.6995	24.3641	23.2987	23.641	22.8136	24.2148	22.4036	22.5615	22.7227	23.3481	21.9093	23.8045	23.0347
XP_004619279.1	23.3859	21.5715	23.041	22.0486	21.9656	22.5776	22.7185	22.865	22.5659	22.4892	23.207	22.4988	23.1816	21.8865	22.2831	22.2232	21.1933	21.9844	22.2052	22.2074	22.075	22.3134	22.0292	22.217
XP_004619293.1	24.9687	23.973	25.7638	28.1141	24.9704	25.29	25.0642	25.3574	24.4181	25.2108	25.0596	25.2785	25.0934	24.486	26.133	24.3471	26.7078	25.0354	23.472	26.9427	24.4689	23.9021	24.3855	26.1457
XP_004619309.1;XP_004619307.1;XP_004619310.1;XP_004619308.1;XP_054994517.1;XP_004619305.3;XP_054994519.1;XP_054994518.1	25.7201	24.4957	25.5901	25.1415	24.8983	24.8986	24.9104	24.6607	24.8747	24.708	24.6828	24.7219	24.8198	23.6337	25.3219	24.8439	23.6767	24.4986	24.7638	24.9932	24.9113	24.5206	24.7738	24.605
XP_054995338.1;XP_004619343.2	20.273	20.0697	21.9977	21.8145	20.6829	21.3108	21.6298	22.2049	22.0792	21.5781	22.3082	23.2206	23.0645	21.6904	22.1923	21.9014	21.7951	21.6125	22.9181	20.8663	21.6301	22.1105	21.9968	20.9332
XP_054995870.1;XP_054995869.1;XP_054995868.1;XP_004619344.1	19.6914	19.7372	18.4709	20.7041	21.8668	22.9375	20.5862	20.8718	20.8795	19.3399	20.1608	20.9177	20.1845	18.8153	20.684	18.3195	20.8471	20.3819	20.1417	19.6876	21.1143	19.1479	20.2985	21.047
XP_054995775.1;XP_054995774.1;XP_054995773.1;XP_004619363.1	26.91	26.3982	27.0983	26.4581	26.2467	25.8123	26.415	26.2317	26.5403	26.3527	26.6057	26.485	26.9133	26.2228	26.747	25.9121	25.1689	25.7081	25.7433	25.6261	26.4831	25.6908	26.3907	26.0572
XP_054994156.1;XP_054994155.1;XP_054994154.1;XP_004619380.1	21	18.8049	21.1324	20.8415	19.0878	20.3556	21.1094	20.4897	21.5427	18.7541	20.6285	20.7317	18.3141	20.0037	19.8668	19.2373	19.4761	19.1427	20.2869	19.0043	19.5243	19.8938	20.7397	20.473
XP_004619452.1;CON__ENSEMBL:ENSBTAP00000025008	20.6763	20.3718	21.3099	21.4077	21.3881	20.7767	20.8644	21.1012	20.7181	20.3134	22.9051	21.4135	21.5966	20.8185	21.0777	20.9731	22.5559	20.5763	22.8897	21.1758	22.4328	22.0534	20.957	22.5482
XP_004619465.2	20.7069	19.3299	20.4974	22.3294	21.3151	19.7705	19.5188	18.7433	18.4973	20.2249	19.4216	21.5752	21.1777	21.1191	20.6319	20.8375	23.2468	21.1468	22.0545	18.9005	21.356	22.5877	20.4588	22.9039
XP_004619466.1	22.4151	22.7904	23.3218	22.5755	22.4483	23.4882	23.4759	23.85	22.727	21.708	22.7318	22.3313	23.4296	22.4866	22.7229	22.4282	22.0032	23.3163	22.6942	22.8154	22.6869	22.2589	23.021	22.589
XP_004619475.1	22.0746	21.2319	23.0554	22.5602	22.079	21.6193	22.0056	22.0796	22.5177	22.5787	21.9956	21.7912	21.9093	19.4635	22.1362	22.2844	18.9001	21.503	22.0208	22.2545	21.564	22.0172	21.6906	21.9734
XP_004619485.1	22.9417	22.9963	24.3824	24.8798	24.4721	22.6052	22.9509	23.6368	23.2259	22.1988	23.6665	23.9507	23.8137	23.2643	23.5627	23.67	25.0786	23.2088	24.5416	22.5886	24.3857	24.4492	24.4939	24.7606
XP_004619538.1	24.1724	23.4584	23.8818	23.6824	23.2034	23.2545	22.9648	23.823	23.5086	21.8163	23.1856	23.399	23.1429	23.6514	23.3919	22.4026	23.5477	23.2359	23.2648	23.4619	23.6956	23.1905	23.7991	23.5544
XP_004619545.1	20.4713	20.7242	21.8388	21.8158	21.5279	20.1883	21.3483	20.793	21.7538	21.6923	22.0889	21.594	21.3956	21.5229	21.1893	19.1993	21.8762	21.4408	22.3655	21.4171	21.7499	22.4435	21.5395	22.4451
XP_004619631.2	23.7533	23.132	23.9152	23.7552	23.8962	23.1019	24.3028	23.652	25.1235	23.3485	24.0675	23.4672	23.8569	24.1625	23.5479	21.4833	24.5299	23.2911	23.0994	22.6847	22.6046	23.9308	23.1142	23.2089
XP_004619686.1	26.0329	25.6598	26.2374	25.4684	25.3027	25.3663	26.0548	26.4699	25.555	24.8692	25.7367	25.9703	26.671	26.1696	26.0952	25.3414	25.1225	25.8267	25.7355	24.8999	25.506	25.1248	25.7084	25.6224
XP_004619738.1	20.9339	19.5226	22.5935	23.3848	21.6349	19.3026	19.4288	21.419	19.5172	20.0091	20.4947	20.9385	21.4379	19.6095	21.671	18.8043	19.9741	23.2213	21.3688	19.767	21.842	20.5663	22.1237	21.1127
XP_004619768.3;XP_055001926.1;XP_004619765.2;XP_004607848.2;XP_055002172.1;XP_055002164.1;XP_004619764.2;XP_004619766.1;XP_012787990.2	20.0516	19.2803	20.4193	18.1041	19.2673	19.4793	21.6629	21.3169	22.231	21.7303	20.5799	22.4993	21.733	20.5224	20.008	18.6763	18.8483	20.1402	18.9627	19.3905	20.1224	18.6764	20.2954	19.6832
XP_004619872.1;XP_055001897.1	23.3211	23.1554	22.9626	24.1971	23.8024	22.6498	23.1837	22.428	23.5199	23.0528	23.6394	22.5489	22.9927	23.2205	23.1814	22.9244	22.9098	22.6926	24.0098	21.3572	24.1923	23.3679	24.3061	23.9291
XP_004619876.1	30.2491	29.104	30.4161	29.2244	29.8047	29.3385	30.3106	28.2058	29.2088	27.4743	28.2028	28.8036	28.6628	28.1033	28.9511	26.9339	27.1732	26.5171	25.6905	28.1416	28.7052	29.0031	29.7756	27.509
XP_004619892.1;XP_055001669.1;XP_055001668.1;XP_012788286.2	25.1377	24.1491	25.8721	25.0219	24.5607	23.8961	25.3244	25.8159	24.7825	21.8717	24.7894	24.5767	25.424	24.6601	24.9689	24.6565	24.3725	25.3225	24.7622	22.7032	24.6252	24.9597	25.1426	24.7788
XP_004619896.1	22.8816	22.3719	23.075	23.7778	23.284	22.1564	22.4394	23.0592	22.5483	22.8287	22.651	23.137	23.3994	23.125	22.8392	22.9581	23.2947	22.5708	23.3048	21.9513	22.6595	23.1326	23.007	23.2727
XP_004619905.1;XP_004619904.1;XP_054997215.1;XP_054997214.1	20.6643	18.911	22.2255	21.928	21.9281	20.7704	22.552	19.3824	21.2378	21.1746	21.2282	22.5212	21.435	21.6127	21.2961	19.5927	22.7635	18.7914	20.4795	20.8858	22.6075	21.4296	21.8132	22.783
XP_055001762.1;XP_055001761.1;XP_055001760.1;XP_004619914.2	21.7378	19.0623	22.2939	19.477	19.5126	20.7834	20.9342	21.6765	21.7999	19.096	20.9847	19.4473	20.9886	18.088	19.7967	20.4035	20.6065	18.8483	19.083	19.2571	20.2265	21.0121	20.0943	19.3145
XP_004619927.2;XP_055001010.1	24.0666	24.1434	24.1221	23.6607	23.8579	24.3008	24.9344	23.9711	24.6601	24.751	25.263	24.9782	24.3832	24.7018	24.3758	24.399	23.7739	24.2765	24.1214	24.2797	24.3313	23.7792	24.6695	24.9986
XP_004619937.1	25.7636	25.4537	26.1784	26.3214	25.9451	25.9116	26.0076	26.2097	26.2563	26.3457	26.3253	26.127	25.8569	25.872	25.6803	25.7108	26.0933	26.0558	26.3306	26.5584	25.6564	26.2498	26.0708	26.4215
XP_004619940.1	21.9718	20.6062	21.6811	22.8672	21.818	21.0137	21.1025	21.1719	20.7115	20.7131	20.9283	19.6644	21.5918	21.0507	22.7288	21.2842	22.3883	20.7428	21.5754	21.0294	22.6135	21.9333	20.9818	22.054
XP_004619944.1	29.3783	29.2155	29.4835	28.6833	27.0908	28.9675	29.0131	29.543	29.2068	28.8579	29.3368	29.1444	28.9604	29.1092	28.747	28.5755	27.7544	28.6999	28.5643	28.8547	28.2947	28.3737	28.4827	28.871
XP_004619947.1	28.6644	28.5889	28.4158	27.6569	27.7452	28.8849	28.5705	29.0757	28.9088	28.7813	29.2523	28.5497	28.2504	28.8045	28.5309	28.0342	27.918	28.0942	28.4884	27.4943	27.1934	27.436	28.5939	27.8859
XP_004619995.2	20.7544	20.475	22.033	22.6508	22.3773	20.8237	20.8212	22.5081	21.749	20.3406	21.1278	21.6001	21.5516	21.7578	20.4488	20.0549	22.8683	20.6954	21.6089	19.3739	21.2987	22.5731	21.9437	21.8798
XP_004620092.1	24.5217	24.8194	22.7689	20.1972	23.014	22.1688	21.3334	21.6451	22.9866	22.9629	22.4804	23.4161	23.0954	19.7828	25.6248	25.3907	21.5413	24.8576	23.759	22.9164	23.3949	21.7742	23.3148	24.1204
XP_004620094.1	25.2409	23.3137	24.0403	23.2146	24.873	23.0334	20.0203	22.4658	24.0172	24.5712	23.3731	24.3417	24.1495	22.0397	26.6294	26.1765	24.9349	26.9387	24.7796	24.856	24.7592	23.4289	24.4722	25.9276
XP_004620110.1;XP_054996703.1	24.9026	23.0822	24.6544	23.6223	23.3117	23.6573	24.6683	24.3051	23.7873	23.599	23.779	23.4756	23.6208	23.2178	25.1231	23.4594	22.9888	23.0886	22.8042	23.2804	23.6068	23.3553	24.3386	23.4259
XP_004620119.1;XP_054994677.1	23.0113	22.9634	23.1011	23.9792	23.1908	22.9143	23.1327	23.1127	23.0499	23.374	23.5815	23.7047	23.9401	22.8585	23.7551	22.8298	23.2657	23.4942	22.8004	23.0404	23.9752	22.3857	23.9937	23.3766
XP_004620121.1	27.6741	27.825	28.4745	28.4803	28.5771	28.4391	28.8377	28.8779	28.7187	28.2617	28.773	28.5204	28.8098	28.3684	28.2732	28.1958	28.7064	28.5701	28.7451	28.8254	28.3856	28.7626	28.9158	28.7001
XP_004620154.1	25.6944	24.7608	25.7179	26.1018	25.7225	25.1628	25.6282	26.0692	26.2001	26.1814	26.511	25.6357	25.3033	26.0119	25.9855	26.028	26.4179	25.8538	26.7734	26.4128	25.5105	26.709	26.3646	26.1638
XP_004620167.1	18.6128	19.7376	18.3525	17.9983	17.1497	19.1728	23.7069	18.4401	20.2353	17.4892	18.7666	19.899	19.2366	18.295	16.4675	18.645	18.2715	19.2249	19.1898	18.9203	24.9063	19.4656	19.4436	20.8589
XP_054994729.1;XP_054994726.1;XP_004620310.1;XP_054994725.1;XP_054994730.1;XP_054994728.1;XP_054994727.1	23.0773	22.7721	23.4324	23.3791	22.5655	22.7785	23.2121	23.2528	23.6187	23.0539	22.9093	23.0642	22.9694	22.9997	21.998	22.1584	21.9104	22.876	22.1066	22.8007	22.3631	22.433	22.7815	22.437
XP_004620324.1;XP_004609512.2	25.0915	24.7399	26.0653	27.03	26.6897	25.2907	25.0645	25.4995	25.9581	25.6259	26.5518	26.6816	26.2418	26.0399	25.8714	26.068	27.4333	26.3545	27.4213	25.6638	26.8449	27.2008	26.6302	27.5064
XP_004620333.1	22.2561	21.4158	19.7209	22.6116	22.0152	21.9276	22.0934	22.3484	22.2993	21.762	21.8323	21.8211	21.8585	21.6152	21.6614	21.7885	21.4192	21.6443	22.3385	21.4193	21.6592	21.9531	21.2555	20.807
XP_004620391.1	25.5755	24.9994	25.3066	25.53	25.2902	25.5493	25.5003	26.2637	25.7742	25.6567	25.9052	25.7417	25.6545	26.0408	25.7133	25.6416	26.3357	25.7854	26.2261	25.6726	25.3681	25.5036	25.4567	26.1988
XP_055003425.1;XP_055003424.1;XP_055003423.1;XP_004620435.1	22.8436	22.5904	22.2455	18.7642	21.945	22.408	22.5078	23.028	22.3556	21.8229	22.6385	23.3067	22.3636	19.8985	22.3961	22.1098	21.7453	20.303	22.3755	21.3936	21.9799	22.9638	22.1108	22.9624
XP_054998476.1;XP_054998475.1;XP_004620449.1	23.3547	22.6124	24.3963	22.968	22.6478	23.2978	22.436	23.042	22.3471	23.0836	22.8633	23.2807	22.8659	22.448	23.5181	21.8792	22.2562	22.6799	22.8725	22.5119	22.5017	21.7139	23.1157	23.4167
XP_004620571.1	23.3354	22.7128	23.3753	23.1117	23.4366	23.1033	23.527	23.5631	23.7027	22.7212	23.0409	23.0732	23.4789	23.0325	22.8172	22.3741	22.2605	22.7418	22.5934	22.8302	23.3204	22.5641	23.1121	23.1025
XP_004620574.1	20.3548	21.6449	18.7933	19.8923	20.3117	20.5351	19.1423	20.3136	21.1972	20.5267	22.6176	22.2777	20.5217	18.6933	21.3933	21.0134	21.9158	21.1607	19.5787	21.5445	20.619	21.5729	20.486	21.6981
XP_004620601.1;XP_054993922.1;XP_054993921.1	20.0214	17.1176	23.5207	24.2936	23.3481	22.2689	22.961	23.1953	23.4677	22.6128	22.7034	23.3894	21.1003	22.3309	23.1191	22.7273	23.9372	22.7262	24.0632	21.4218	23.7546	24.0435	23.8809	24.0579
XP_054980861.1;XP_054989762.1;XP_004620623.2;XP_054980860.1;XP_054982615.1	24.8231	24.7892	24.9184	23.8345	23.7961	24.8911	24.3156	24.2089	24.1363	23.8908	23.8749	23.3806	24.0808	23.3246	23.213	23.6611	22.9324	23.2105	23.1793	23.6432	23.6375	23.384	23.9203	23.7893
XP_054997245.1;XP_004620668.1	26.0801	25.7764	26.4739	26.1762	25.2006	25.535	25.8809	26.8237	26.3392	26.2797	26.9833	25.9762	26.0733	26.0509	26.5996	25.6544	25.4634	25.4289	26.1884	23.9608	25.0746	25.1951	25.909	26.1212
XP_004620737.1	20.1144	20.3148	21.4785	21.7269	21.8098	19.4642	19.3884	20.5193	19.2637	18.9096	20.3838	19.0968	19.7481	19.1681	19.6818	19.7253	23.4471	18.7	21.6931	19.5797	20.4475	19.9176	19.8256	21.8005
XP_004620745.1;XP_054983236.1;XP_054995400.1	24.2936	23.8741	25.2053	24.8038	24.3337	24.0964	24.794	24.8022	24.7039	24.0652	24.4723	24.4206	24.8668	24.2708	24.474	24.2346	23.7894	24.0678	24.3113	23.2708	23.683	24.3234	24.9468	24.4365
XP_004620763.1;REV__XP_054980628.1	26.3985	25.4095	26.0082	25.0411	24.6735	25.6639	26.0346	25.5146	26.1122	26.5861	25.9818	26.3526	25.9305	26.2559	26.241	25.3193	24.8999	26.2571	25.6658	24.5564	25.3054	25.36	26.5314	26.0054
XP_004620779.2	19.9163	18.6535	21.1782	21.4916	21.1353	21.0204	20.7506	19.53	20.9622	21.1363	21.3877	20.1863	21.8897	19.0589	19.5102	20.1182	23.2221	19.7134	23.04	21.3479	19.4954	21.844	21.3179	21.7816
XP_004620781.2	21.7451	20.1592	24.4075	25.1424	24.9121	23.2316	23.3813	24.5109	23.3681	22.7004	23.5735	24.5417	24.146	24.3021	23.957	23.7423	26.403	24.3849	25.6113	22.9862	24.2389	24.8615	23.2088	25.11
XP_055001711.1;XP_004620786.1	23.4539	22.6939	22.4415	21.9149	22.6975	23.0554	23.2871	23.3126	23.1526	21.6662	23.1973	22.3953	23.013	23.0577	22.9023	22.6712	21.5797	22.2623	22.4106	22.1476	22.1714	22.2505	21.7005	22.056
XP_004620792.1	25.1217	24.9875	24.244	24.7949	25.3095	25.6001	25.2556	24.9328	25.6157	26.1082	24.6676	24.4787	24.9646	25.315	24.351	25.3555	24.6512	23.7634	24.2593	24.5516	24.2834	23.4722	25.263	24.4923
XP_004620804.1	19.8821	19.1673	20.9451	21.2947	20.8161	20.2484	20.5658	20.4991	20.695	20.0899	21.1729	20.7765	19.7367	19.6778	21.252	20.5411	20.1403	18.4784	18.7964	20.3951	20.9745	20.0374	21.4804	20.7942
XP_004620806.1	20.6484	17.5581	21.0154	20.698	20.3648	20.6155	20.5783	20.1317	21.7012	20.0692	18.5134	18.1338	20.6157	19.5204	19.2022	19.6494	20.5504	18.8489	19.7726	19.0218	19.9856	19.1521	19.6893	19.6734
XP_055002279.1;XP_004620828.1	23.9597	22.2146	22.5856	23.9548	21.8323	22.1427	22.536	22.4998	22.2259	19.1334	23.0031	23.7967	23.2846	21.801	22.0027	22.0192	23.8843	22.4248	23.1745	22.458	24.2099	24.71	23.5201	24.304
XP_004620899.1	20.7062	20.4539	19.6171	20.3352	19.6549	20.606	20.6202	20.5674	20.6347	19.7977	21.9697	20.9324	20.0598	21.012	20.8245	19.8235	21.591	19.9286	21.2702	20.1113	19.3614	19.7306	19.1775	18.3681
XP_004620907.2	21.274	20.3824	23.1166	23.8022	23.6239	22.2192	21.57	23.074	21.292	21.2555	23.7475	24.1479	22.9813	23.1834	22.7813	22.7714	24.8241	23.0568	24.5932	21.574	24.009	23.9938	23.1834	24.1088
XP_004620955.1	22.0208	21.581	22.6034	21.259	20.6394	21.7688	22.7398	22.2203	22.2132	21.6763	22.0234	21.3677	22.435	20.8484	21.2964	21.6929	19.675	21.2718	21.7185	21.4758	21.5015	21.0393	22.2116	21.7896
XP_054987175.1;XP_054987174.1;XP_054987173.1;XP_054987171.1;XP_054987170.1;XP_004621055.1	21.1834	22.1096	20.9386	21.1037	21.948	19.8643	22.4729	20.8829	21.6437	20.6884	20.8259	20.4644	21.7986	20.5134	20.7025	19.9561	19.8765	18.9852	20.569	19.3833	19.4733	19.0767	20.1319	18.1818
XP_004621109.2	20.0293	20.9892	21.7104	22.6868	23.7029	20.9995	18.4684	21.5916	20.1115	20.3003	21.9492	22.9384	21.469	22.4078	21.0574	22.2537	23.6562	22.1895	23.9353	20.9991	22.7939	23.4615	21.6922	23.6735
XP_054987363.1;XP_004621128.2	19.3184	19.4132	18.8887	21.1897	20.3381	22.234	21.018	20.7216	21.0858	20.9696	18.079	19.5803	20.3157	19.5642	19.7316	21.7948	19.5435	19.9471	19.9652	23.3419	22.9812	21.2582	20.4365	21.0436
XP_004621194.2	23.459	22.2233	23.9802	21.6042	21.9655	23.1617	23.8452	22.176	23.3318	22.5379	21.5681	20.9863	20.7681	21.7224	23.635	23.5695	21.9329	22.6378	23.3324	22.2909	22.945	22.6332	22.3321	23.1029
XP_004621195.2	20.516	19.3067	23.0609	21.2237	22.3008	20.9261	22.5074	20.9071	18.9101	19.2802	20.3363	19.6313	19.0252	21.546	19.5257	19.0589	21.5092	18.6357	22.2257	23.5643	21.0929	19.4905	19.531	20.6849
XP_004621196.2	25.7046	25.8099	25.2833	25.2786	25.7628	27.1432	26.0753	24.6497	25.8782	26.4186	24.886	24.6723	24.5099	25.1629	25.4927	26.2159	23.8683	25.0647	25.1903	25.6192	25.1545	25.6496	24.0775	25.3
XP_004621197.2	19.5899	23.4376	23.6121	18.9511	22.301	25.0323	25.9104	22.9956	23.8643	24.681	20.6651	22.0636	23.2741	22.9673	23.1038	23.3669	21.5226	23.5411	21.3994	20.2624	25.5334	23.5133	23.4078	23.9034
XP_004621199.1	24.8154	24.9397	24.9232	25.2417	24.3418	25.8101	25.6886	24.4816	25.3699	25.7598	24.8223	25.8014	23.7183	23.7494	24.4552	24.3481	23.1559	23.6975	23.0961	25.5259	24.1249	24.3078	23.7939	24.2747
XP_004621223.3;XP_054976261.1;XP_054976264.1;XP_054976262.1	23.4481	22.8294	23.2277	22.3715	19.5288	22.2816	23.7601	23.4224	22.5874	22.2705	23.5469	21.0085	21.8853	22.5788	22.6685	22.8428	22.0274	22.2817	23.3313	21.96	22.2487	22.8809	22.5009	23.3772
XP_004621273.1	24.0875	23.9697	26.3968	23.6758	25.8953	24.9406	24.5185	24.4592	24.6176	26.0216	25.6951	24.1809	24.8467	24.4332	26.5035	26.4974	27.2237	24.5967	24.8606	26.7046	25.0771	24.521	26.0492	25.9898
XP_004621284.2	23.5566	21.4922	24.5361	22.7367	24.8853	23.8234	23.3656	23.0476	22.8664	24.4043	19.3782	19.9122	22.0201	22.8398	22.1389	25.2522	21.8546	23.5464	22.5062	25.6654	23.1772	23.3322	24.477	24.1363
XP_054981275.1;XP_004621320.1;XP_054984740.1;XP_004616874.1	22.8541	21.6117	23.2846	22.5711	22.7215	22.0676	22.4583	22.6962	22.6013	22.166	22.245	22.8317	22.1368	22.0465	21.6521	21.8214	20.6868	21.6853	21.7451	21.2301	21.7722	21.6117	21.9857	21.9348
XP_054982999.1;XP_004621336.1	23.0279	18.8257	19.5564	19.9974	21.2863	23.5165	18.9183	22.9831	21.6897	18.9453	21.4761	21.1107	22.6065	21.8412	21.4404	18.6229	21.4444	18.804	21.3276	21.2601	21.6346	21.7492	20.3273	21.4684
XP_054984698.1;XP_054984697.1;XP_004621361.1;XP_054984696.1	18.6107	19.6635	21.0477	19.8754	21.0775	20.2122	18.8989	18.8092	20.8605	21.7158	21.8767	18.3323	21.55	19.3056	22.0574	18.1258	20.9037	20.8573	21.0922	20.9177	21.0901	19.1343	22.2963	19.4754
XP_004621375.1;XP_054985683.1;XP_054985681.1;XP_054985682.1	20.3737	19.3004	20.8186	20.322	19.9417	21.5583	20.5251	20.6716	20.6359	18.9745	19.3763	19.2902	18.6646	19.9237	19.2274	19.2152	19.8421	18.785	20.3066	19.8041	19.2849	18.6774	20.0932	18.4505
XP_004621455.1;XP_004621454.1	22.2108	23.1414	22.2123	20.7776	22.1279	21.7363	22.2813	21.6054	21.8281	19.8677	21.5321	22.018	22.4871	21.8268	21.6898	21.7215	21.94	21.4127	21.1709	21.8006	22.0561	21.417	21.5051	21.4234
XP_004621491.2;XP_055002345.1	22.0449	20.561	22.1232	22.0584	21.9071	22.2637	21.3158	22.5177	22.2607	22.0701	23.2274	22.6988	22.2874	22.1247	22.8892	22.4503	23.0324	22.2248	23.2476	21.6883	22.5125	21.6812	22.6785	21.731
XP_054989468.1;XP_004621530.2	18.7653	19.8445	20.1476	19.9302	19.1756	19.2991	20.0597	19.4127	19.4404	22.2959	21.7592	23.3479	23.3038	23.8151	23.8837	23.0523	20.9227	22.08	19.7058	18.66	24.3162	19.8248	23.9414	24.2008
XP_054974963.1;XP_004621561.1	21.1583	21.7808	21.7896	23.0521	22.9534	21.4577	21.1139	23.12	22.7179	20.8378	21.9647	22.1596	22.0585	22.368	21.9803	21.2302	24.0523	21.8848	22.2136	21.9931	22.2694	23.237	22.8421	23.0329
XP_004621570.2	21.5659	19.3541	22.0477	22.5221	21.8977	21.9193	21.1191	21.7206	21.3562	21.1132	21.3179	22.3551	21.8753	21.4021	21.586	19.2058	22.0035	19.3369	21.6985	18.0385	22.1843	21.3687	21.4344	21.0667
XP_054994472.1;XP_054994471.1;XP_054994470.1;XP_054994469.1;XP_004621644.1;XP_054994473.1	21.8125	19.049	22.9325	23.1228	22.0746	21.1356	21.8295	21.6465	21.7312	21.0931	22.9475	23.0069	22.8489	21.8149	21.8472	21.3336	22.3079	20.337	22.223	19.0798	21.3369	21.536	21.7158	22.1153
XP_004621742.1	20.0301	20.7226	18.9867	20.294	20.54	19.848	20.5209	20.7959	19.2704	19.2634	19.7859	22.1138	20.9053	18.791	19.0772	20.0697	20.7056	18.811	21.3403	19.6918	22.1743	22.1841	21.1943	22.1282
XP_004621745.1;XP_004621744.1	23.9646	22.4211	24.035	24.4714	24.548	22.921	22.8846	23.3865	23.6784	22.1403	22.9437	23.0827	23.0698	23.0721	22.9061	22.2096	22.9955	22.2759	22.0605	22.7604	23.3746	22.3725	22.7241	21.9767
XP_004621757.1	23.5751	22.7065	23.2398	23.0786	23.4889	23.6659	24.0499	23.7094	24.8768	24.2025	23.9692	23.3131	24.1271	24.3438	22.8133	23.056	23.7064	23.1169	23.807	24.8405	23.4433	23.686	23.2942	23.6999
XP_004621764.2	22.5961	20.7668	23.2303	22.9529	18.7096	23.4016	23.487	24.1263	23.9492	22.8918	24.2966	24.0829	23.7404	22.8883	23.7402	22.6937	24.4343	22.7215	24.0429	23.6717	23.8785	22.188	23.8318	23.2178
XP_004621810.1;XP_004604949.1;XP_054984545.1	22.1237	22.5277	22.2017	22.2314	22.7866	20.3085	22.392	22.4151	22.3809	22.378	22.6314	22.573	22.7415	22.4538	22.3913	21.7862	21.6899	22.202	21.6363	20.8402	20.8728	20.8006	22.3786	21.4264
XP_004621842.2	20.9984	22.6376	22.284	22.6996	22.3488	22.7093	20.9459	21.3629	21.5257	22.0096	18.7965	20.7878	19.4795	20.3874	21.6221	19.649	19.5957	18.8118	20.4498	18.3994	20.1721	18.9054	19.0924	18.3551
XP_004621918.3	21.1015	19.1941	21.0808	23.7543	19.7741	20.5778	20.7253	20.0801	19.2117	18.0302	21.9642	23.9704	22.3568	19.1908	22.0972	21.9759	22.1094	19.0518	22.7183	18.1975	21.7159	19.3727	19.4763	21.9189
XP_004621926.2	19.2957	21.6455	21.6459	21.5207	21.735	18.1797	22.4268	19.9619	19.3713	18.6268	18.2425	21.6196	20.0187	20.5694	21.6151	21.2133	19.0492	18.4289	21.8784	21.6007	23.1827	19.3615	18.2771	21.414
XP_004621947.1;XP_004621956.2	29.0851	26.6518	27.5617	27.5211	27.5808	29.0589	29.3351	27.8365	28.4611	29.4049	28.9971	28.9705	27.2667	27.0883	28.1387	27.891	26.9796	28.1937	28.2747	27.2218	28.0691	27.2303	27.5748	28.0684
XP_004621955.1	22.1706	20.3687	19.0693	19.7356	21.854	21.9323	22.5908	21.3925	21.2834	22.262	20.6248	21.2998	21.1007	18.8973	20.3719	20.9314	18.6818	17.7329	20.0457	19.3418	19.6184	20.7689	20.4575	21.041
XP_004621998.1	26.512	22.4053	24.8026	24.843	23.4623	24.6333	21.0674	20.1064	22.7849	21.4651	21.6954	21.8004	19.7906	20.7671	25.5899	23.3362	23.1571	23.2985	21.1274	18.9589	24.2334	22.5447	18.1506	23.0955
XP_004622075.1;XP_004612412.1	22.4736	22.0183	22.0253	22.7442	21.9284	21.5725	23.0084	19.7646	20.1568	21.305	23.308	22.4521	22.2968	21.898	19.124	21.1663	20.8755	21.5382	18.8488	20.9809	22.7782	21.6761	22.5927	18.9734
XP_054992152.1;XP_004622274.2	25.7018	25.4857	24.9999	25.849	26.2918	24.5446	24.6044	25.7755	26.0518	25.2674	25.8997	26.2588	26.0034	25.3386	25.3095	26.0716	26.2708	25.8948	25.8366	25.8971	25.6855	26.2819	25.5409	25.9474
XP_004622775.2;XP_054984622.1	21.8195	20.7685	22.1416	21.2849	21.0231	22.1611	21.9707	21.918	22.7486	21.9553	21.6587	18.4855	21.6844	18.7431	21.4785	22.2925	20.2335	21.0316	19.6247	20.9932	20.8067	18.9055	22.8044	21.2614
XP_004622795.3	19.8578	20.4888	17.5598	20.2076	19.8093	19.5051	19.7458	19.3864	20.3421	19.5144	20.1391	21.3508	19.3393	19.5788	19.3839	19.2674	22.0087	19.833	21.6685	20.7471	22.7258	20.5785	18.9676	20.7807
XP_054982313.1;XP_004622918.2;XP_054981388.1	22.2636	22.5369	23.6173	23.4338	23.5126	23.5975	22.3423	22.9958	23.2428	23.0283	24.0544	23.4315	22.9196	23.1887	22.8216	22.8666	23.512	22.4992	23.7197	23.4912	23.5258	23.2436	23.1897	24.2667
XP_012787227.1	20.4638	19.0458	21.6444	19.4464	19.201	20.5283	21.1698	20.0592	22.1359	19.4738	23.737	19.9916	19.153	19.0803	21.3968	21.6358	18.4621	19.3992	19.4445	19.6345	19.2235	19.6217	21.2386	20.3549
XP_012787351.2	24.5238	23.4556	25.5383	24.257	24.5522	24.6973	25.1716	25.2201	25.679	24.4938	25.8485	25.2753	25.2873	24.6323	25.3576	25.0845	24.2949	24.8954	24.762	24.6056	23.8006	24.3687	24.8795	24.3926
XP_012787360.2	20.8033	18.2158	21.8489	19.2355	19.7965	19.8679	21.1574	21.0577	21.6966	21.5135	20.2939	21.7418	21.7411	19.7265	21.0431	18.5818	18.6598	17.9165	20.0204	18.7176	20.3381	18.5874	20.889	19.162
XP_012787530.1	21.8141	21.1368	20.3447	21.3722	20.7895	20.6663	21.4886	20.9298	21.2231	21.5653	21.3595	19.3982	21.1882	20.915	21.8146	21.3388	24.2816	21.2117	21.2535	20.9329	22.8881	21.2304	21.0039	20.9888
XP_054997262.1;XP_012787549.2;XP_055000372.1;XP_054995814.1;XP_054980557.1	24.6505	25.5483	24.363	25.146	24.3871	24.6203	25.9403	26.273	26.1249	24.8268	25.8508	24.6108	25.2904	26.2888	25.7086	24.3058	24.9872	24.8905	25.1423	23.9336	23.912	24.8041	25.2827	24.8071
XP_055000769.1;XP_055000768.1;XP_012787666.1;XP_055000770.1;XP_004606232.1	19.9807	22.8096	20.1659	20.9246	22.1803	17.8051	21.7537	21.5856	21.5949	18.5761	19.0116	22.3316	22.0284	19.5588	19.3505	19.0548	20.6044	20.5517	20.2953	19.2406	21.544	22.0607	21.7114	20.9569
XP_012787729.2	19.2627	19.1532	19.3149	20.3461	18.838	19.656	19.6614	19.5903	20.2838	19.8465	20.3117	20.4683	19.5101	19.6514	18.373	19.7799	18.4534	19.5939	19.5971	19.6679	20.0757	19.5429	19.55	19.516
XP_012787801.2	20.1052	18.4247	19.1359	20.5611	20.89	20.2208	20.0852	20.1144	19.0379	19.3582	19.5168	19.9816	18.0753	19.4465	19.4218	19.3863	19.069	18.7096	18.3491	17.3639	19.9269	20.1049	20.5083	18.9014
XP_012787843.2	18.7038	19.3505	22.2235	22.8192	19.7072	18.5821	19.336	18.8985	20.9491	20.8125	20.8781	20.2496	21.6762	19.2207	22.299	21.5684	22.6231	21.3036	21.604	21.4006	22.1398	22.1849	23.4789	23.1162
XP_012787942.1	25.5662	24.8255	25.8059	24.2934	24.6332	24.3969	25.4035	25.0079	23.9107	24.4153	24.902	24.1349	25.4236	23.4866	24.2641	25.062	24.2484	22.8499	23.5433	22.3765	25.3083	24.6674	24.0577	24.9017
XP_012788006.2;XP_055002322.1;XP_055002321.1;XP_055002320.1	22.0635	22.0845	22.3369	22.2642	18.4822	21.8658	22.1003	22.2745	22.9508	22.1557	21.9457	21.7733	22.0847	19.9658	22.6081	20.1204	21.5128	19.0729	19.5349	19.2775	22.1242	21.4375	21.8061	20.5562
XP_054976861.1;XP_054976860.1;XP_054976859.1;XP_012788038.2	21.9116	18.6701	22.2444	22.6754	22.2859	21.2507	21.7329	21.8576	22.219	22.1874	21.8434	22.1102	21.9524	21.9273	22.6123	22.4165	22.9336	22.2631	23.239	22.9511	22.2183	23.4457	19.9917	23.5341
XP_012788261.1	24.9927	23.6506	25.6707	25.4539	25.039	24.8089	25.2515	25.1022	25.5321	25.3203	25.4975	25.1631	25.6954	24.3126	25.1688	24.7844	24.5062	24.8804	25.3939	25.1841	25.3371	24.8647	25.5244	25.2289
XP_054988831.1;XP_012788435.2	23.9847	22.4362	24.2669	22.8402	22.9305	22.6655	22.6038	22.491	22.4145	22.5011	23.1503	22.5239	23.5913	21.9645	23.3335	22.6922	22.3859	22.5485	22.4874	21.981	23.6912	22.1153	23.0291	22.6262
XP_054988830.1;XP_012788441.1	19.0001	20.9762	21.4396	19.9569	18.809	19.1214	19.4663	20.5741	20.7679	18.89	21.4722	20.4491	20.6584	20.2118	20.6353	19.6846	20.0731	21.0146	20.0559	19.8432	20.183	20.5937	20.994	22.0041
XP_012788707.2	23.298	22.2299	25.1084	25.6077	25.326	22.9759	23.0524	23.5972	23.2905	18.513	24.4762	25.6406	24.1193	23.6557	23.286	23.4221	26.3619	23.7798	25.5124	23.546	24.7592	25.1572	23.8344	25.828
XP_012788809.2	24.8906	24.1688	24.6654	24.1926	23.807	23.8529	23.9775	24.3226	24.0631	23.0917	23.7085	23.8025	24.098	23.1185	24.0362	23.6155	23.0394	23.7623	23.5253	24.0304	24.1159	23.9203	24.1083	24.3303
XP_012788836.2	19.8282	19.7882	19.4675	21.1372	21.3	19.4992	19.4109	19.0253	18.6903	17.986	19.7396	21.1879	20.1814	19.3152	20.1202	20.9264	23.358	21.5331	22.991	21.0952	21.4088	22.5666	21.829	22.7496
XP_054979684.1;XP_012789209.2;XP_054979685.1	21.648	20.8946	22.9305	22.4799	20.7493	20.799	19.1798	22.7688	20.1645	20.1264	21.8059	22.3898	22.1519	21.507	21.2482	21.5862	23.2718	21.5872	23.5636	23.601	21.8014	25.4913	23.5989	22.0554
XP_012789659.2	19.1275	19.7946	19.4126	19.3485	20.5831	19.7757	18.9019	19.6801	20.4846	19.7382	20.4062	21.6569	20.3062	19.9378	20.0074	20.3988	19.3309	20.2523	20.1797	19.137	23.467	20.6984	20.6285	19.8926
XP_012790028.1	23.6678	24.327	23.2828	22.6418	22.9947	23.6985	24.4823	23.9478	23.7407	21.9808	24.2651	23.5867	23.7904	23.6877	23.6412	19.562	23.3248	22.2906	22.4926	21.6592	23.1923	21.9129	22.7121	22.6947
XP_012790124.2	23.5891	23.5262	24.295	23.4536	23.9702	23.9157	23.9008	23.5622	23.44	23.9747	23.1972	23.1937	22.8127	22.798	22.999	24.1387	22.64	23.2949	22.7003	24.0484	23.989	23.8938	23.7914	23.3198
XP_012790154.2;XP_012790153.2	18.5137	19.1933	18.9771	22.9523	18.611	20.0722	19.6371	19.442	21.9581	20.3177	23.5762	25.7266	20.602	24.2046	20.7013	21.5064	24.1937	21.8537	24.0336	18.9991	22.041	23.4247	22.5734	24.0277
XP_012790357.2	21.5446	19.3917	20.6159	19.8405	20.5744	19.4611	21.1011	21.8525	22.2947	21.6089	21.836	21.3525	21.645	21.2755	21.9297	19.4972	18.3704	20.3867	21.5997	20.1143	21.983	21.6099	22.3266	21.9133
XP_012790362.1	21.8375	22.3689	20.2858	21.2234	19.6937	21.8446	23.25	21.9516	21.4294	21.9659	23.5868	19.9222	22.6663	22.8056	23.228	21.5965	19.2304	21.4941	21.1551	19.3879	23.4456	22.8565	21.9342	21.3044
XP_054999402.1;XP_054999401.1;XP_054999400.1;XP_012790433.2	24.8445	24.416	25.1788	24.2032	24.1015	24.5009	24.0513	24.294	24.3463	23.275	24.1521	24.1227	24.533	23.5775	24.22	24.2685	23.0196	23.9166	23.7421	23.9967	23.882	24.8521	23.8026	24.62
XP_054988340.1;XP_054984108.1;XP_012790515.2	22.3206	26.1663	22.6015	20.2853	18.8118	22.4419	22.9678	23.7978	22.5778	21.9617	22.0374	22.1517	22.6481	21.8893	21.7789	20.9933	19.0325	26.246	21.3353	21.3865	21.517	19.3399	21.8822	19.742
XP_012790549.1	21.4269	19.6727	21.5976	23.7856	22.7473	21.0412	21.0534	20.649	21.2709	20.2006	21.5317	21.1736	21.3068	21.5836	21.037	20.9712	22.3524	20.7067	21.8152	19.1108	22.0796	22.1594	21.8302	22.5467
XP_012790595.1;XP_054994520.1;XP_004619306.1;XP_004619304.3	21.2232	21.4337	21.7603	21.5261	20.8513	20.976	21.0338	21.0071	18.7563	21.7188	21.3564	21.283	21.1187	18.7779	21.6762	21.3912	18.2302	25.8744	21.146	22.9586	22.4789	19.6162	20.1812	21.5239
XP_012790619.1;XP_054996473.1	22.6904	21.9589	22.8193	21.6744	22.2291	22.0885	22.5832	22.2873	22.3504	21.9757	22.4306	22.6206	22.8576	22.2757	22.5476	22.3604	21.3681	22.1675	22.9639	22.7142	22.8844	21.5321	22.5748	22.4488
XP_012790764.1;XP_055001596.1	19.9121	19.0779	20.3711	20.7235	20.708	20.1536	20.3228	21.3021	23.3713	21.686	21.2647	22.059	21.228	21.2618	21.1033	21.3694	19.5557	20.6417	19.9611	19.6857	20.0982	19.9233	20.7775	19.83
XP_012790775.2	20.1836	19.5186	20.9569	19.8691	20.1951	20.2862	20.1059	20.5354	20.449	19.465	19.1379	19.4326	20.73	20.1066	18.066	19.4756	17.6155	18.6945	20.3161	19.5424	19.2927	19.0739	19.122	18.2791
XP_012790832.1	22.3092	21.6442	22.2482	21.136	21.4341	21.5755	22.6836	22.5901	23.1902	19.4717	22.0409	23.6531	22.0371	23.441	21.9476	20.8108	18.645	20.5122	21.8172	20.3469	21.7296	22.0783	21.6638	18.7912
XP_012791250.1	22.1146	19.4727	23.5637	24.1593	23.65	22.406	22.4068	23.5948	22.9951	20.5958	24.0954	24.774	24.6537	22.5419	23.7009	23.0646	23.712	20.6109	23.7482	19.0682	22.5681	23.3061	24.0251	24.2759
XP_012791254.2	19.2031	21.4997	22.4788	23.2811	21.2757	20.4428	21.1003	21.7522	21.0783	19.707	22.3316	23.439	23.1935	22.6605	23.5586	24.0881	24.568	22.3667	24.5522	21.1407	24.0977	24.7026	23.5709	24.2299
XP_012791329.2;XP_054988691.1;XP_054976373.1	22.3537	24.1926	22.1517	22.2027	21.5146	23.1672	23.5544	22.9629	23.4933	22.6028	22.2745	21.8759	21.4196	21.8095	22.4105	21.1494	21.2495	21.1666	20.3511	20.4295	20.155	20.6526	22.2545	21.7387
XP_012791385.2;XP_054982504.1	22.5073	22.9125	23.1377	22.4374	22.0865	22.6908	23.0662	22.2486	22.7102	22.6638	21.9116	22.1114	22.4461	21.9321	22.2106	22.2714	19.8936	21.2377	21.4254	21.7897	21.7759	21.6252	22.2527	21.7922
XP_012791502.2;XP_054984395.1;XP_054984396.1	19.1591	18.4715	19.7744	20.0651	19.9655	21.3687	21.1467	21.2615	22.1001	21.0749	21.0821	20.0277	20.6024	21.5322	20.6785	19.4253	20.2262	19.6572	20.8044	20.3911	20.5943	20.8721	21.3444	21.5913
XP_054988447.1;XP_012791550.2;XP_054980412.1	26.0353	25.3818	25.9725	25.2541	25.7533	25.5958	25.8694	25.7704	25.6606	25.7846	25.9234	25.0721	25.487	25.2628	25.328	24.218	24.2951	24.5812	24.3978	25.2607	24.522	23.9889	25.0937	24.2301
XP_012791623.2	22.2543	23.16	23.2139	23.2121	22.5126	22.3251	22.156	22.6051	22.1908	22.0659	23.2734	23.1625	23.1716	24.2883	23.0351	22.4015	21.5923	21.7371	23.0737	20.6839	22.6079	23.2041	22.6699	22.9204
XP_054983482.1;XP_012791634.2;CON__ENSEMBL:ENSBTAP00000031900	19.6204	19.4073	25.1921	18.746	23.2206	20.2362	19.4329	18.804	20.5624	20.35	19.0909	20.1146	18.9362	19.652	21.9986	24.9551	20.3773	20.4903	19.6869	22.1576	22.7473	19.8847	21.4979	20.9475
XP_012791641.1;CON__Q29443;CON__Q0IIK2	27.4515	26.3088	26.9133	26.0551	27.8492	26.8666	25.6932	25.6596	25.7296	26.9212	24.831	25.8387	25.1509	25.0593	25.3126	26.7642	25.6779	25.8449	25.7128	28.1374	27.2309	26.3455	27.5674	27.0119
XP_012791658.2	20.3079	19.7312	19.2953	18.4562	20.3351	20.9732	19.5506	21.9983	18.4463	21.7003	21.6348	17.9001	20.3823	20.3409	22.45	19.0349	19.862	20.3018	19.8294	21.4696	21.1492	21.0108	19.247	18.9742
XP_012791660.2	25.042	23.4981	23.842	23.5972	24.1901	24.8387	23.3211	23.5008	23.1823	23.9566	21.9501	22.0046	22.8394	22.8811	22.5265	23.9775	22.5189	22.7814	22.4182	24.8286	23.8662	24.2666	23.202	23.909
XP_054973897.1	25.3266	24.5614	25.8822	24.1128	25.1582	25.0453	25.073	25.4858	25.1458	25.2657	26.1794	25.1787	25.515	25.4893	25.84	25.3978	24.8164	24.9695	24.8225	25.0631	25.2469	24.6986	25.7365	25.3721
XP_054973928.1	25.964	26.1872	27.1061	27.0495	27.0081	25.2802	25.7665	26.3084	26.317	25.8356	26.3513	26.2692	26.391	26.0293	26.8184	26.1716	26.1038	26.0357	25.904	25.9492	26.3046	26.4053	27.3545	27.0216
XP_054974069.1;XP_054974067.1;XP_054974066.1;XP_054974070.1	23.5718	21.1811	22.4344	21.5181	20.4551	22.844	23.6168	23.3545	22.7108	22.2149	22.952	20.9163	21.3414	21.8653	22.8235	22.7326	22.0326	21.891	22.4822	21.9081	22.5734	21.5997	20.964	22.8682
XP_054974079.1	21.5597	18.4645	20.8392	20.1373	18.6398	21.7242	22.0184	20.3972	22.5128	20.8994	20.6141	18.7871	18.9438	19.4838	19.7176	20.0949	18.8112	19.0845	20.6054	18.6208	19.8249	19.8397	18.958	20.241
XP_054974113.1;XP_055002428.1	25.3782	25.1884	24.731	25.1578	24.4532	24.9019	25.9912	25.8417	25.6758	25.0881	25.4853	25.4212	25.756	25.7225	24.3729	24.2238	24.3636	25.3045	25.3514	24.6388	24.1447	24.4097	24.9548	24.6524
XP_054974119.1	19.4372	18.7608	21.4205	20.3973	20.4323	19.1773	20.9745	19.8048	20.4152	19.2552	20.7776	19.107	22.2323	19.1634	21.5271	19.5722	18.3692	20.2497	21.6741	19.9614	19.7051	20.0525	20.3016	19.7813
XP_054974128.1	24.1776	21.0599	23.2262	23.1294	23.7192	22.5538	22.4191	19.197	20.9517	22.1952	19.2342	21.475	19.9942	20.1064	19.5573	19.6629	19.4471	18.989	18.839	24.2646	24.2344	21.8598	24.7837	22.9042
XP_054974158.1;XP_054974157.1;XP_054974156.1;XP_054974155.1	19.4158	18.8393	21.1744	21.2325	21.2505	18.3103	18.946	20.3918	20.1237	19.5857	16.4446	20.6411	18.9091	19.4577	19.8401	19.9452	22.2384	19.405	21.4031	21.2184	22.355	23.7526	21.5103	19.9773
XP_054974174.1	19.6845	19.1543	16.8624	20.9065	17.857	18.2901	20.2519	20.3885	19.7485	19.2842	20.316	20.4899	19.4727	18.9801	17.5767	18.9942	23.9683	20.3072	22.3776	18.5303	21.3667	22.4014	17.9497	23.2852
XP_054974195.1;XP_054974194.1;XP_054974193.1;XP_054974192.1;XP_054974191.1;XP_054974189.1	22.1194	18.3245	21.3464	21.2984	20.9529	21.4557	22.0347	21.4572	21.473	19.4136	21.3831	21.8461	22.3723	21.0265	21.0258	21.1451	21.0243	22.1004	21.8446	22.1174	22.0934	21.537	21.3732	20.9694
XP_054974196.1	20.3119	19.9746	18.4541	22.4919	21.9067	20.2189	20.8301	21.6771	21.1714	19.1351	20.6917	19.9183	19.5903	21.5938	20.5485	20.2626	19.4897	21.4214	21.6349	20.7234	19.4016	21.1554	21.7045	22.3049
XP_054974212.1	22.413	20.6158	23.774	22.4041	22.7304	18.8828	19.9945	19.5643	18.8597	18.7578	19.0436	20.3618	18.6234	19.5311	21.5743	21.8934	19.5801	18.4829	19.1338	24.1315	23.1232	22.1904	22.594	23.1025
XP_054974239.1	23.4287	22.9315	23.6248	23.5297	23.0101	23.0166	24.0864	23.2671	23.5984	23.287	23.9785	23.8973	23.8404	23.4525	24.6229	23.6167	24.036	23.3878	23.3401	23.5731	25.6834	23.4211	24.6492	23.968
XP_054974272.1;XP_054974270.1;XP_054974269.1;XP_054974268.1	23.4237	23.0239	22.4277	22.3233	22.0737	23.0663	23.2607	22.9422	22.7771	22.0524	22.5601	22.311	22.7593	22.1633	22.6529	19.3688	21.5513	22.2885	21.5106	20.3564	20.0023	21.417	18.4612	19.8248
XP_054974273.1;XP_012789493.2	24.4756	24.2131	24.6954	24.4187	23.857	24.4399	24.381	24.7103	25.0919	23.8695	24.5219	23.8231	24.141	24.1834	23.7784	23.9602	22.6717	23.6302	23.8031	23.4409	23.4532	23.9344	24.1909	24.047
XP_054974339.1	21.757	19.3104	23.4405	24.6798	23.4946	20.413	22.2508	22.6357	22.0717	22.5186	23.4257	24.0379	23.4879	22.0696	22.6759	23.2616	25.4569	23.6108	24.7564	22.2531	24.7201	24.9736	24.3828	25.12
XP_054974365.1;XP_054974364.1	25.3352	24.3898	25.1678	24.5787	24.6342	25.2249	25.5397	25.4372	24.8776	24.7662	25.5843	25.6475	26.0334	25.4331	25.3028	25.2982	24.4023	24.9025	25.1382	24.87	25.8638	24.3086	25.169	25.542
XP_054991965.1;XP_054974366.1	24.4702	23.2577	23.4091	23.1586	23.2365	24.0922	23.7762	23.7863	24.3047	24.2514	23.1704	23.8027	23.525	23.4367	23.3987	23.6883	22.5517	23.2329	23.5382	23.1013	22.9753	22.7782	23.6854	23.1613
XP_054974382.1;XP_054974381.1	22.0044	21.1904	23.5622	24.4926	24.2868	22.4023	21.6832	22.0832	21.7494	22.1831	23.3355	24.492	22.5919	23.1342	22.2617	23.5768	25.9777	23.4641	24.9309	22.7116	24.556	24.7527	22.7204	24.8019
XP_054974400.1;XP_054974399.1	19.6846	18.5031	18.523	19.8889	20.4871	18.097	20.086	20.5391	19.1537	19.7946	18.8347	19.0429	19.548	19.4584	21.7853	19.8357	21.6578	20.109	19.2145	21.1306	20.8916	19.8706	21.2877	20.0547
XP_054974403.1	21.6344	21.0225	19.2127	21.2364	20.3297	21.3608	22.0399	21.9262	22.8072	20.7131	21.9672	20.5723	21.2517	21.1003	20.4106	19.5724	19.4963	20.6767	20.895	21.4684	19.3051	20.3908	19.9064	20.4458
XP_054974518.1	21.925	18.9469	20.7184	20.8004	23.107	19.2743	21.0663	21.2954	19.9502	18.9119	20.6548	19.7173	18.3209	19.4917	20.8308	21.8471	23.0507	18.2284	20.0255	23.9996	19.9552	18.6225	21.4616	23.4986
XP_054974519.1	23.0494	20.519	25.0944	22.7721	23.4844	22.792	22.7106	23.5373	23.1397	23.7904	22.2232	23.7209	24.508	22.5315	21.4162	19.7646	20.4361	21.5955	22.5417	21.4114	21.1526	19.8034	22.7827	21.6951
XP_054974526.1;XP_054974524.1	21.4827	18.2182	21.4684	19.5247	19.183	20.3575	22.42	22.0397	21.3831	21.3974	21.8768	20.5351	20.4567	19.3072	20.8209	19.749	18.0451	18.9773	20.4972	19.6734	19.7712	18.8396	19.5703	20.8522
XP_054974623.1;XP_004613286.2	18.9561	18.8471	23.0714	23.0596	22.713	22.6803	17.9644	22.7407	22.553	19.0654	22.7472	22.8556	23.1486	22.6568	23.2526	22.9632	23.1741	22.8699	22.0145	22.3564	24.261	21.8808	22.5674	23.7293
XP_054974678.1	24.3294	24.2158	25.8507	26.0536	25.7673	23.9411	23.9946	24.9838	25.0648	24.651	23.96	25.5689	24.255	24.4666	23.8516	23.7455	24.5033	22.9445	24.7311	19.6425	23.7787	24.0611	24.2295	24.3129
XP_054974746.1	25.3096	25.775	25.2287	24.7146	24.2565	25.3931	25.2993	25.3268	24.4875	25.4104	26.3928	25.3642	25.4482	25.9314	25.0178	24.4108	25.447	25.1539	25.1932	24.6962	25.2258	24.893	24.9543	24.0264
XP_054974810.1;XP_054974809.1;XP_054974808.1;XP_054974807.1;XP_054974806.1;XP_054974805.1;XP_054974803.1;XP_054974802.1;XP_004609568.1;XP_054983916.1	22.8149	21.5502	23.5554	22.8902	23.1802	22.31	23.0653	22.8102	23.2666	22.6831	22.2999	22.7732	22.618	21.9639	21.9158	21.8769	22.3869	21.7303	22.4257	21.9215	22.6289	22.0775	23.0569	22.6221
XP_054974894.1	23.8779	23.3985	23.8886	23.3195	22.4867	23.2023	24.0056	23.0012	23.3247	22.5875	23.6404	23.5329	23.7725	23.4314	23.1849	22.836	22.3066	22.8424	23.1384	23.063	23.0656	23.6266	22.7923	23.0614
XP_054991941.1;XP_054974935.1	25.3939	23.9977	25.0649	23.4418	24.4027	24.7266	24.9158	24.7869	24.6904	24.8043	24.8489	24.1138	24.8608	23.2956	25.4055	24.3388	22.6648	23.1751	23.4486	18.527	24.0368	22.7605	22.777	22.1442
XP_054974940.1	23.2196	23.0728	23.7481	24.0423	23.721	22.6342	23.7348	23.5962	23.7143	21.7575	23.797	24.2005	23.9879	22.3755	24.4589	22.3398	22.7448	21.7462	22.5562	21.6421	22.9022	21.8995	24.3743	22.8114
XP_054974967.1;XP_054974980.1	19.3147	18.8327	19.8978	21.1016	19.5876	19.3757	19.7977	20.8274	20.5897	19.0232	20.9855	24.4836	20.7351	21.3373	20.3289	19.2125	22.861	19.1585	22.1575	19.1532	20.8916	22.1526	21.7849	22.5041
XP_054974995.1	19.462	19.4563	21.8471	22.5036	19.7176	19.8153	21.708	19.8606	18.9258	19.7185	21.5475	24.3551	22.8717	20.6179	19.0615	19.2127	18.8205	19.7568	18.8871	18.8605	19.7153	19.3065	18.9596	21.2375
XP_054975002.1	21.7729	20.4983	23.5506	23.9211	22.7831	22.0386	23.0806	22.1203	22.8017	22.2379	23.3701	23.5523	24.0284	22.6576	22.9976	22.3399	23.4844	22.5239	23.0339	22.0015	22.2996	22.0424	22.6517	23.3273
XP_054975003.1;XP_054975004.1;XP_054975005.1	19.5192	18.9905	19.2961	19.8491	18.7887	19.2803	19.4668	19.2621	18.6907	20.0898	18.0766	18.689	18.8344	20.2639	20.8465	22.9113	22.7261	20.4161	22.5897	21.4417	22.8918	22.934	20.7596	23.3994
XP_054975076.1;XP_054975075.1	19.5724	21.0534	20.7816	23.1041	20.7713	20.3103	19.4146	21.6766	20.8132	21.4071	22.1626	23.3237	21.514	22.0381	21.5471	22.3031	22.2028	21.5917	23.5309	20.3039	22.8644	23.4167	22.8052	23.62
XP_054975084.1	18.5848	19.0797	19.365	19.5545	19.8951	19.4864	20.3257	18.0901	19.7311	19.2279	18.9777	20.1318	18.3658	19.4437	19.1031	19.139	19.6928	19.6412	19.5508	20.0272	19.8225	22.2205	19.2015	18.6557
XP_054975093.1;XP_054975092.1;XP_054975091.1;XP_054975090.1	21.1898	18.8282	19.1744	19.1952	20.5403	20.4854	19.7538	21.4673	21.1535	21.1417	18.6749	22.3657	20.693	21.6118	21.2803	18.587	21.4209	20.8864	20.3579	20.228	19.827	20.6293	21.5476	18.2504
XP_054975185.1;XP_054980595.1;XP_054980383.1	22.6392	19.1184	22.0626	18.4378	19.2472	21.6682	23.4922	21.0025	22.1745	21.637	21.7427	22.5497	23.3028	22.2434	21.1763	21.3717	18.0836	18.8243	22.4056	19.3032	20.2923	18.9044	20.2585	22.1797
XP_054975191.1;XP_054975192.1;XP_054974632.1	21.1992	21.3438	21.209	21.137	19.9355	20.9182	22.1947	22.3129	22.1055	18.5117	21.1944	21.1215	20.8779	21.1216	21.7743	21.0383	20.9273	19.1225	20.6919	18.2438	21.6167	21.1111	21.511	21.3395
XP_054975194.1	28.0374	26.8065	27.6047	28.0007	27.3132	26.8016	26.8527	27.3051	26.8415	25.9162	27.635	27.7694	27.8006	27.2361	27.2255	26.9554	27.7699	26.9115	27.7991	27.1981	27.6106	27.9403	27.2827	27.9715
XP_054975227.1;XP_054975228.1;XP_054984614.1	22.9342	22.2367	22.0793	19.0666	21.7233	22.6695	22.5784	23.0139	22.5542	22.4192	22.5415	22.6792	22.1142	22.0867	22.0427	21.5677	22.3798	22.1415	22.232	22.1046	21.9871	22.0645	22.651	22.1678
XP_054975254.1;XP_054975255.1	22.8538	21.3478	23.3384	23.9788	23.1901	20.1978	22.5981	22.4488	22.4384	21.652	22.7155	23.8806	22.6436	23.2332	22.7561	21.799	23.5219	22.2779	23.6553	22.2666	23.1182	23.2676	22.7515	23.5222
XP_054975368.1;XP_054975369.1	22.6015	21.668	22.3062	22.2819	21.9476	22.6745	22.8616	21.4263	22.9467	22.2245	22.3295	22.0907	21.8473	21.8339	21.6671	21.5915	21.0213	22.3171	22.0841	22.0583	21.5491	21.7999	22.2381	22.1816
XP_054975376.1	22.8022	19.9502	20.1431	19.7666	22.0136	20.8963	22.3586	20.0756	20.0367	21.6853	20.3297	18.1326	19.0435	18.8673	18.9751	19.7789	19.178	19.81	19.8804	20.1848	18.7963	19.7174	19.5933	21.9365
XP_054975406.1;XP_054975407.1	21.6912	18.1825	21.4683	19.8541	19.6438	22.3119	22.6102	22.0639	21.4083	20.1707	20.2221	18.3697	18.2738	20.7007	21.3884	19.3445	20.8203	19.8816	19.8237	19.7831	21.3226	19.5484	20.2006	18.7814
XP_054975469.1	18.891	18.6273	19.9876	20.2236	19.2325	19.2322	19.7059	20.0547	18.3315	19.2914	20.2913	21.2497	19.7481	19.2949	18.7051	19.0031	24.571	19.0973	19.8548	19.0999	21.8159	24.2605	19.3156	21.537
XP_054975488.1	24.8173	23.645	24.7842	24.6372	24.4896	23.9902	23.9913	25.4852	23.8937	23.4063	26.5617	26.2462	26.2961	24.2501	24.2444	25.2079	25.0917	25.2274	25.7175	24.574	25.1214	24.5796	24.4326	25.0666
XP_054975562.1	24.4193	26.4631	25.2932	25.2947	25.9365	26.4773	25.6331	24.8758	25.3431	26.4872	25.8552	26.2314	25.6676	25.7185	25.1987	25.3046	24.3283	25.0289	25.0095	26.1604	24.74	25.949	23.4086	24.8446
XP_054975568.1	23.9693	25.0532	24.7936	23.77	24.763	26.863	25.7006	25.3776	25.5719	26.7895	25.1928	25.3672	24.9554	26.2915	24.0994	24.6109	23.0687	22.1176	23.0452	24.1525	23.7769	23.9438	23.9869	23.0658
XP_054975590.1;XP_054975583.1;XP_054975589.1;XP_054975588.1;XP_054975587.1;XP_054975585.1;XP_054975584.1;XP_054975586.1	19.5084	18.4273	19.3105	19.2366	20.6861	20.8405	21.4523	20.2976	20.7919	18.3432	18.7213	21.0946	20.9998	20.9203	18.2705	20.0709	20.6318	21.4678	18.8911	18.7232	21.6856	21.4214	20.985	21.7418
XP_054975686.1	23.8099	23.6262	25.1199	24.6251	23.9815	22.5778	23.7351	23.8622	23.3228	21.362	24.068	24.1369	24.3248	23.5128	24.5591	24.1426	23.9596	23.5041	23.7735	24.1596	24.6411	23.9366	24.6749	23.7975
XP_054975689.1;XP_054975691.1;XP_054975690.1;XP_054975688.1	21.3238	20.1303	18.8736	19.7606	20.6982	18.5245	20.6325	20.5415	20.6281	18.5224	19.9655	20.1858	20.8355	18.2852	20.2169	20.8373	19.6917	19.9817	20.4416	19.0571	20.1378	20.0066	20.25	20.8899
XP_054975713.1;XP_055001479.1;XP_004607756.1	22.4444	21.5919	23.5629	23.0732	21.9828	22.3761	22.6403	22.7685	23.003	21.537	21.983	21.9458	22.1666	23.3159	21.4006	20.359	20.7243	22.3068	21.5045	21.7878	22.9918	20.7369	22.7555	22.4566
XP_054975729.1;XP_054975728.1	22.8269	19.6515	23.7495	23.7001	23.5083	21.9207	22.7768	23.2999	23.2104	22.93	22.9108	23.1281	23.4283	22.8634	23.1622	22.6054	23.034	22.3879	22.9501	22.0119	22.9769	22.8732	24.0745	23.6251
XP_054975732.1;XP_054975731.1;XP_054975730.1	23.2866	23.7542	23.1373	24.1327	22.9835	22.4878	23.1122	23.5586	22.6234	22.6297	23.1412	23.2467	23.4055	22.4306	23.0444	21.204	22.6015	19.7687	18.2475	21.8674	22.9261	23.1939	22.4105	22.3003
XP_054975812.1	24.3346	24.6046	25.7064	25.6396	25.3167	25.4163	25.5444	25.4886	25.9313	25.4267	25.3461	25.4475	25.4985	25.3213	24.8932	24.7634	24.3022	24.4929	24.7058	24.9527	24.7996	24.5052	25.4876	25.1322
XP_054975877.1;XP_054975876.1	20.4525	18.885	21.9405	19.5077	21.9569	22.857	19.2463	19.9281	20.4594	19.3853	21.4613	20.3043	22.2176	20.6286	19.0095	21.4467	21.6144	22.4668	22.0902	21.4309	21.8941	18.2031	22.4124	18.8677
XP_054975887.1	25.5274	24.6892	24.4063	24.4715	24.2148	25.0231	24.478	24.4378	23.8854	23.7064	24.437	24.7919	24.3069	23.8314	24.7451	24.7065	24.6152	24.1101	24.7374	24.9429	24.8645	25.1045	24.3746	24.9078
XP_054975899.1	20.6192	18.8296	22.7414	23.2366	22.7692	20.017	21.2338	19.662	20.7097	20.7699	20.6286	22.2754	21.819	21.2551	21.128	22.1816	24.1128	20.3425	23.285	21.734	23.2249	23.5225	22.1065	22.5401
XP_054975916.1;XP_054975915.1;XP_054975914.1;XP_054975913.1;XP_054975912.1;XP_054975911.1;XP_054975910.1;XP_054975909.1;XP_054975908.1	19.2715	20.5506	20.3913	19.8478	20.0731	20.4536	21.4811	21.1832	21.1087	18.7477	21.1279	20.8044	19.5999	22.0774	19.1328	20.9767	20.156	19.2068	20.0109	18.5689	18.4488	20.4042	19.3773	18.5432
XP_054975931.1	20.1693	19.1563	21.9325	21.8632	21.7723	19.4071	19.1239	18.9851	21.5673	21.2441	21.3426	21.5893	21.7437	20.5424	21.8231	19.0271	20.9857	19.8847	21.1627	19.0049	21.0925	21.3643	21.6468	21.3662
XP_054975995.1	26.4266	25.124	26.1717	26.4329	25.499	25.1452	25.45	25.7526	25.5353	24.314	26.4919	26.1646	26.4116	25.4293	26.6921	26.3248	25.6097	25.6494	26.4793	25.8171	26.3845	26.4143	26.7318	26.6078
XP_054976039.1;XP_054976040.1	21.337	20.163	19.9887	19.0347	20.0328	21.1232	22.9545	22.0371	21.6303	21.8527	22.3495	22.0761	20.0285	21.3131	20.8032	19.1328	22.0402	20.0164	20.015	18.8002	20.3706	18.3275	20.0525	20.0885
XP_054976048.1;XP_054976046.1;XP_054976042.1;XP_054976053.1;XP_054976050.1;XP_054976049.1;XP_054976047.1;XP_054976044.1;XP_054976043.1;XP_054976052.1;XP_054976045.1;XP_054976054.1	24.7836	23.444	25.7647	25.1839	24.8091	23.421	24.3711	24.6996	24.1093	23.8756	24.7036	25.0071	25.0179	24.1409	24.5995	25.1408	24.62	24.5572	25.1815	26.0444	25.6823	25.8397	26.0338	26.1175
XP_054976169.1	20.6258	19.2148	20.1448	21.1292	20.5289	19.6084	19.1134	21.5881	19.2772	19.2979	19.2553	19.9039	19.0068	18.8039	20.0855	20.3314	19.4193	19.9533	20.1643	19.0082	20.3662	20.6876	19.0317	20.4819
XP_054976241.1	21.211	20.6173	22.5841	22.6468	21.7599	21.9318	21.6053	22.3349	21.0131	21.3413	21.0509	21.3913	20.7643	21.3507	22.343	22.5154	22.7225	20.4992	22.5285	20.5645	23.5946	21.4658	22.5651	23.0376
XP_054976290.1;XP_004600330.1	21.511	21.4063	22.358	22.0795	20.6859	18.8028	21.7859	21.5904	21.5338	21.832	21.5579	21.2118	22.1155	20.7515	21.7824	20.722	20.0263	21.2286	21.0414	20.2629	21.2802	20.4374	22.3344	20.754
XP_054976353.1;XP_054976352.1	25.3568	24.2716	25.1707	24.3385	24.6309	24.438	24.2791	24.3633	24.9438	25.0584	25.3613	24.5627	24.3679	24.472	25.1633	25.0568	24.1178	24.6883	24.3542	25.5359	25.3336	24.5405	25.6501	24.4626
XP_054976367.1	22.8309	19.6709	19.8116	22.7737	19.3337	26.3037	25.3576	23.7838	25.2472	25.3351	23.7254	23.1508	18.8215	24.0133	22.7485	22.7932	19.9423	19.7288	19.4377	20.539	19.6928	20.5167	22.3422	22.8484
XP_054976371.1	25.7693	25.2026	27.3049	27.4639	27.4161	27.0481	27.9131	26.709	27.3133	27.9379	26.9653	27.553	27.8877	26.7888	27.2812	27.6876	26.0191	26.7434	25.9361	28.8917	28.5031	27.1267	28.116	27.5563
XP_054976411.1	24.6337	23.6029	24.0556	23.3781	23.3553	23.6695	23.6052	23.7052	23.7769	23.4605	24.0523	23.173	23.6303	23.2227	23.338	23.6027	22.5399	23.2377	23.4173	23.7547	23.1514	23.8476	22.7482	22.1943
XP_054976471.1;XP_054976472.1;XP_054976474.1	22.5153	22.0908	23.525	22.6817	22.2578	22.3957	23.136	22.9528	23.2533	23.0588	22.7419	23.0742	22.9833	22.7022	22.4698	22.7831	22.3433	22.3387	22.8601	22.5719	22.2527	22.2371	23.8317	22.6928
XP_054976480.1	26.1098	25.6242	25.4812	24.7492	24.5431	26.7128	25.7588	26.2986	25.9519	24.9303	26.1197	25.8468	25.8019	25.7941	25.7281	25.0268	24.7078	25.5411	25.3401	25.4049	25.8448	25.6412	26.0499	25.742
XP_054976501.1	27.6905	26.9283	27.58	26.7434	26.7899	27.5732	27.8485	28.0394	27.3992	26.5216	27.5275	26.9848	27.8394	27.11	27.0832	26.8029	26.6815	27.5398	26.9618	27.6079	27.4441	27.2484	27.3861	27.4111
XP_054976528.1;XP_054974942.1	27.1069	25.4173	26.9823	26.1509	26.1549	26.3023	26.4222	26.1234	26.4019	26.5012	25.8965	25.9828	26.4535	25.4482	25.9975	25.5956	24.3966	25.7764	25.7013	24.982	25.5573	24.7929	25.2581	25.8276
XP_054976588.1;XP_054976587.1	22.9537	22.5018	23.521	22.9458	22.4161	23.013	23.2945	23.1087	23.5853	23.1019	23.366	22.9016	23.3151	22.6434	23.0421	22.3392	21.9745	22.6173	22.4529	22.5304	22.5801	22.2647	23.2575	22.354
XP_054976624.1;XP_054976623.1;XP_054976622.1;XP_054976620.1;XP_012787548.2;XP_054991914.1	21.7905	21.6913	21.9524	21.8831	19.9705	19.4503	21.9327	22.0029	21.774	20.8689	21.4663	19.9359	24.3632	19.8844	22.6879	19.0243	21.5872	18.886	20.5264	18.9442	19.9209	19.0832	21.5487	21.7069
XP_054976660.1;XP_054976659.1;XP_054988684.1;XP_054988680.1	20.4386	19.2226	21.0029	20.4332	19.5801	17.3318	23.1744	20.2834	17.7985	17.8671	19.4227	18.2143	18.0736	18.8212	21.2649	20.8828	19.2597	20.164	19.1359	20.874	26.1353	21.642	20.9222	20.4073
XP_054976707.1	19.0349	19.1409	21.8373	22.0386	21.2886	20.7374	21.5168	21.6702	21.4804	21.7716	21.0566	22.4439	21.6235	18.5023	21.455	20.393	19.0622	19.204	20.6654	19.5815	21.3635	18.7096	19.7084	21.1871
XP_054976716.1	19.4111	19.187	21.8792	23.6156	22.9534	20.5292	19.9124	21.0643	21.7489	20.7041	22.1109	22.6563	21.2097	21.4691	21.4493	22.2617	24.5258	21.5434	23.7197	22.5892	22.9841	23.6478	21.5475	23.6985
XP_054976786.1	26.202	24.8984	26.3174	25.6289	25.0179	25.336	25.6846	24.9317	25.7893	26.1852	25.8321	25.2826	24.8275	24.3029	25.8205	25.9711	24.197	25.5455	26.0474	24.794	24.8082	25.9039	25.1058	25.4701
XP_054976835.1	21.1157	22.0909	21.7576	22.2173	20.6619	20.0342	21.1727	21.6992	21.4754	18.7546	21.302	21.4485	20.1688	21.656	19.868	20.3915	24.7469	20.8802	21.3714	19.6791	21.525	20.0722	22.3318	22.0494
XP_054976867.1	22.8459	22.1671	24.1521	23.8955	23.3762	23.0735	23.2063	22.8134	23.2105	21.9573	22.7354	24.1806	23.4466	22.5636	23.3535	23.4684	23.0962	23.4701	23.7864	23.0829	24.2765	23.5532	23.4727	24.2553
XP_055001963.1;XP_054976879.1;XP_054976878.1;XP_054976877.1;XP_054988053.1;XP_054984878.1	22.5551	20.904	22.9681	22.2498	22.2886	22.1793	22.4993	22.205	22.6286	22.59	21.9199	22.3112	22.2689	21.6321	21.9325	21.7602	21.1248	21.6186	22.1541	21.0934	21.7855	21.0504	22.577	21.3505
XP_054976946.1;XP_054976945.1	22.1687	22.5182	21.9253	21.4733	20.1788	22.1831	22.3993	21.731	22.007	21.7963	21.6242	21.2883	19.2853	19.0589	21.3698	21.2676	21.0957	21.3299	21.1052	21.4847	20.6037	19.5793	21.8777	21.7626
XP_054996928.1;XP_054976971.1;XP_054976970.1;XP_054976969.1;XP_054976968.1	22.8207	19.8508	21.9143	21.7958	22.4856	23.479	22.3505	23.3434	22.827	21.8374	23.8198	23.427	19.2712	19.7174	23.5484	21.3326	21.4972	19.4634	22.8722	18.8028	21.7944	20.9238	22.1147	21.8933
XP_054977016.1	23.6405	22.7171	24.202	23.6068	23.7569	22.5965	22.9009	23.3244	22.7526	21.8694	23.0784	23.5844	22.9468	23.2254	23.7299	23.7742	23.405	23.3372	23.1426	23.8873	23.7787	24.0917	24.4036	24.8501
XP_054977172.1	23.4279	22.9914	23.8508	22.8536	22.3333	23.2465	23.1181	23.1196	23.4823	22.5161	22.547	23.2271	23.6514	22.3769	21.6206	21.9295	21.7007	22.0357	22.2635	21.3612	22.3153	21.6258	22.1367	22.1077
XP_054977174.1	20.0503	20.5826	19.8689	19.4852	19.8189	21.3551	19.8276	21.3663	21.2426	18.9598	20.3902	20.1025	19.9326	20.6203	19.0777	19.4571	19.9737	19.7767	19.9821	19.0686	20.6311	20.0744	19.71	18.8604
XP_054977181.1;XP_054977179.1	24.2052	25.1209	24.9112	23.4416	24.2081	24.5482	25.6726	25.1254	25.4269	24.6047	25.4916	24.6296	25.189	25.1689	24.7962	24.6451	24.5332	24.5134	24.8524	23.9029	24.7604	24.4904	24.6601	24.5986
XP_054977200.1	22.6033	20.1534	22.4036	23.483	23.1103	23.7799	21.5634	23.1377	21.9624	22.4231	20.8592	22.2655	23.0349	22.0368	21.8042	21.3353	23.0201	22.3951	22.6059	18.6418	22.1202	21.1625	21.3368	20.3439
XP_054977312.1	23.8927	22.5467	23.2222	22.4154	24.247	22.1476	22.7531	22.7232	22.8623	21.3582	22.5304	21.8773	22.534	21.2236	22.2894	22.8204	22.2616	19.5517	22.0821	22.8084	23.2953	21.7812	23.1537	23.0329
XP_054977341.1	19.9594	20.2323	20.8617	21.2916	21.5143	18.997	20.0107	19.0066	19.6138	19.2609	20.0351	20.6694	21.8319	19.6383	20.3506	19.1062	21.1947	21.4418	21.443	21.3759	20.3667	21.1132	21.6031	22.4598
XP_054977351.1	24.2506	23.6343	24.1386	23.6878	23.9131	24.1908	24.2765	24.0823	24.4588	24.7886	24.4372	23.4871	24.0413	23.4568	23.7891	23.6208	23.0637	23.6957	23.6425	23.3865	22.6358	23.6262	23.8962	22.9831
XP_054977437.1;XP_054977438.1;XP_054977439.1	21.7419	19.5399	21.5445	21.5435	22.6479	21.052	22.0197	21.771	22.3925	21.4616	21.398	22.3137	22.194	21.7438	22.244	21.5534	19.1255	21.1041	21.82	18.6867	21.7238	18.9141	22.281	22.1559
XP_054977535.1;XP_054977471.1;XP_054977402.1;XP_054977340.1;XP_054977300.1	27.7964	26.6988	27.9365	27.4446	27.6332	27.0062	27.3183	27.4468	27.8496	27.4571	27.5037	27.6374	27.8827	26.6771	27.467	26.5029	26.6353	26.4718	27.1385	26.5819	26.6115	26.4803	27.2855	26.9724
XP_054996488.1;XP_054977546.1	24.6467	23.4964	24.7204	23.8247	23.7341	24.1152	24.1831	24.05	24.5168	24.3468	24.1761	23.7485	23.7299	23.5772	23.6219	23.9567	22.5347	22.994	23.6696	23.717	23.4009	23.0986	23.4303	23.5118
XP_054977552.1	26.4908	25.2434	25.6791	24.6154	25.0587	24.9565	25.5198	24.5994	24.88	25.0282	25.2267	23.9487	25.3811	24.0613	24.1989	24.6783	23.8813	24.225	23.8554	25.0217	23.6598	24.1084	24.3119	24.1534
XP_054977563.1	21.7591	22.086	22.5422	21.9563	18.835	21.3107	21.3598	22.57	21.7673	21.7687	23.3542	18.8537	18.7916	19.1916	22.1164	21.4106	20.1222	20.7754	21.6081	20.0498	20.7882	20.9046	19.7099	21.0739
XP_054977578.1	20.6282	19.1914	19.3846	22.3672	21.1307	22.6029	21.2852	19.7459	20.3187	19.5529	22.5086	23.7183	20.5225	19.1421	20.2035	23.6969	19.6525	22.997	23.237	21.8145	22.1537	21.6733	19.7561	22.997
XP_054977592.1;XP_054977591.1	22.2861	20.987	23.151	21.7522	20.7355	21.9742	22.0238	20.4611	22.5034	21.958	20.9783	21.7526	22.3655	21.7062	21.5643	22.0126	19.3621	19.5781	22.1633	21.957	21.7855	22.2954	19.621	21.2591
XP_054977618.1;XP_012789305.2	20.981	19.6872	20.4609	20.2507	20.9396	20.1538	21.1239	21.3886	18.7682	18.712	20.9635	20.4355	20.7476	19.8383	21.6898	20.6148	19.8343	20.7756	20.2745	20.9286	20.3043	20.3723	21.5182	19.7573
XP_054977622.1	21.844	19.0906	21.9895	19.9654	22.0082	21.057	21.7305	22.181	22.0061	20.826	22.9477	22.682	22.8704	22.0484	22.495	22.0863	22.2208	19.2224	22.0972	18.0804	21.4733	21.0887	21.2926	21.9064
XP_054977633.1	23.2045	22.4091	23.928	23.3203	23.2859	23.474	23.7476	24.251	23.6244	23.6757	23.606	23.2004	23.3097	22.176	23.2411	22.8216	22.2672	22.6657	22.8829	22.6613	22.7927	21.9786	22.743	22.9222
XP_054977638.1;XP_054977639.1;XP_054977637.1	22.0809	21.446	22.5238	22.6772	22.0281	21.1287	21.4119	21.9982	21.7634	21.054	21.4827	22.0041	22.2642	21.3025	22.2503	21.5171	22.5089	21.0765	21.8168	20.6416	22.2287	21.0674	22.1655	22.1898
XP_054977677.1;XP_054977676.1;XP_054977675.1	20.7394	18.7925	20.7678	21.4451	18.4453	20.1693	20.7892	19.1499	18.6985	18.78	20.9004	22.8611	21.7747	21.725	21.5674	22.2012	21.873	21.7464	21.5575	19.914	21.6657	22.5449	20.6679	22.3644
XP_054977679.1	19.8335	20.25	18.5986	19.776	19.6727	20.3891	20.2199	20.5976	21.4238	20.7724	21.7419	21.0441	20.89	21.4966	19.2127	20.2897	21.6757	20.7997	21.3203	21.1794	18.7312	21.4259	21.6982	21.3976
XP_054977709.1;XP_004619303.1	24.0216	23.4011	23.9802	22.2523	21.111	23.2293	24.5215	24.6893	23.6987	22.1786	23.6902	23.3725	23.8781	22.4803	23.2241	23.3321	22.2682	23.2276	23.5358	23.1656	23.5651	21.5063	22.3755	22.4082
XP_054977710.1;XP_054977705.1;XP_054977701.1	21.7716	20.442	21.6013	21.9972	21.7045	21.6108	22.035	22.1439	22.2907	21.1906	22.2344	21.5294	21.5294	21.9145	19.2064	21.5046	21.359	21.7703	21.7128	21.8458	21.6738	21.7593	22.5626	21.9568
XP_054977797.1;XP_054977798.1	22.2753	21.8595	20.682	20.6764	21.0463	19.4447	22.2712	22.711	22.6132	21.4232	22.0218	23.1174	21.6683	22.1323	21.3944	19.216	20.2549	23.8416	21.5888	22.2837	21.8061	20.6624	19.5769	21.6044
XP_054977815.1	21.2389	19.6138	21.853	20.8398	21.2012	21.481	21.0854	21.6773	21.4847	21.2661	21.5244	22.3533	20.8558	21.298	22.1698	22.9632	21.9035	22.2705	21.8286	22.2339	22.6423	21.5464	21.356	22.9994
XP_054977817.1	24.9685	24.4314	25.1449	24.91	24.477	24.963	24.7431	24.6505	24.2363	23.1999	24.7783	25.1896	25.4738	24.7789	24.6694	24.7324	24.9998	24.535	25.259	24.8369	25.3634	25.9751	25.5334	25.5892
XP_054977825.1;XP_054998719.1;XP_054997751.1	22.9092	23.3446	24.3332	20.6606	23.9286	22.5414	24.9906	23.7956	23.2631	22.4399	23.8153	23.3399	25.2245	24.0972	25.2471	22.7619	25.875	22.2079	23.3446	19.5883	24.248	24.0829	22.2334	23.0052
XP_054977875.1;XP_054977874.1	22.79	23.7747	23.5324	22.8551	23.2246	24.7461	22.4791	19.1808	23.5247	25.9807	24.0818	22.7909	23.0314	22.4963	23.4381	19.4554	22.6655	22.7978	23.2162	24.6435	22.8128	22.6814	22.9102	22.4113
XP_054977895.1	23.6777	23.819	24.3675	23.7478	23.3853	23.5638	24.6652	24.7553	24.3051	23.881	24.5495	23.8982	24.4102	23.486	23.9347	23.6271	22.9806	23.933	23.7166	23.6899	23.5577	23.1447	24.1356	23.9371
XP_054977997.1;XP_054977996.1	22.0676	22.5701	21.6603	21.8596	22.8647	21.4021	22.025	22.7648	22.3028	18.0272	22.0153	21.6994	18.1148	21.6126	21.5582	21.4113	22.1625	22.4544	21.2234	21.014	21.545	19.7879	22.0982	21.3028
XP_054978103.1;XP_004612708.1;XP_004621322.1	23.1503	22.4133	23.5739	23.3333	22.9122	23.6643	24.1237	23.9491	23.8292	23.637	22.4126	23.5898	23.5722	23.2278	22.3592	18.7662	21.8999	23.4858	23.3772	23.0997	19.6938	22.9729	23.3656	22.799
XP_054978139.1;XP_054985113.1	22.432	18.7917	19.0081	20.2103	19.8083	22.2246	20.5933	21.5013	21.2209	19.1159	21.5278	22.5575	19.206	22.998	21.6817	21.4094	22.3652	20.5439	20.0737	20.7301	22.497	20.0444	20.2746	22.1894
XP_054991666.1;XP_054978141.1;XP_055000374.1	25.4215	24.856	24.9173	25.0461	25.9653	25.6678	26.7037	26.6431	25.9545	24.2541	25.371	25.7319	26.5325	25.6321	25.3173	25.6283	24.93	25.1988	25.4685	23.3802	24.1935	25.8778	25.2654	24.9589
XP_054978180.1;XP_054978178.1;XP_004606601.1;XP_054993006.1;XP_054978179.1;XP_054999865.1	22.9156	21.8837	22.111	21.4866	20.8009	22.4174	22.4092	22.5178	22.4093	21.5329	21.3663	22.2055	22.1754	21.3478	21.2515	21.2868	20.1499	21.3198	21.2575	20.5389	21.7967	22.0093	20.5716	22.1248
XP_054978200.1	24.8007	24.3197	25.127	25.5791	24.6106	24.6353	25.4184	25.709	25.2815	23.953	25.0703	24.5927	25.155	24.244	24.9972	23.8722	24.7369	23.8597	24.5003	25.2668	24.2102	23.9829	24.8046	24.8598
XP_054978227.1	22.8274	18.7507	23.6384	22.0192	22.8099	23.0314	22.0761	21.2963	23.3316	23.3962	25.4394	23.9083	23.2399	22.9538	23.7823	22.6273	22.0838	22.7595	22.1353	23.29	22.0896	21.3602	22.4965	21.741
XP_054978235.1	20.6339	18.9926	20.4737	19.5873	19.3476	18.7774	20.0078	18.3559	20.0215	18.5082	20.0471	18.7018	18.521	19.3498	20.2385	20.6564	18.9659	20.0765	20.6366	20.0943	21.6197	21.0549	19.9787	20.8316
XP_054978369.1	25.2932	24.7768	25.9097	25.1382	25.4113	24.5788	24.4822	25.1884	25.0175	24.1177	25.0385	24.7517	25.0717	24.2926	25.0599	24.2807	23.8803	24.2386	24.3283	25.0671	24.6012	25.0378	25.388	25.1577
XP_054978372.1;XP_054978371.1;XP_054978370.1	22.4317	20.6686	22.2244	21.9002	21.789	21.8208	22.637	22.5329	23.1861	22.5749	23.0785	23.3923	23.6257	22.5735	22.706	22.6605	22.5782	22.9016	23.0189	21.6687	22.6854	22.7926	22.9361	22.6204
XP_054978429.1	21.7777	19.27	21.8135	20.2813	19.0252	18.8238	22.1695	22.1333	22.5381	20.9396	22.2369	21.4457	22.2344	20.0569	21.878	21.0113	20.5992	19.6484	21.7702	24.2113	22.5227	19.1586	22.3222	21.8609
XP_054978548.1	23.4884	24.8424	24.5613	24.6424	23.7691	23.7087	24.814	24.6473	25.0816	24.6754	25.2558	24.708	24.3289	24.8348	23.7224	22.8473	22.9093	24.1384	23.9297	24.1535	23.3772	23.357	24.2774	23.8564
XP_054978666.1;XP_055002772.1;XP_004605416.1	23.7799	23.83	24.3342	23.6839	23.6021	23.6442	24.1819	24.0434	24.2318	24.7051	24.3072	24.2345	23.8315	23.0078	24.4876	24.3691	23.3504	24.032	23.9208	24.1412	24.0423	23.8641	23.943	24.1213
XP_054978722.1	22.3349	22.0008	22.6125	22.6469	22.4064	21.5528	22.3445	22.4887	22.7121	22.3862	22.1777	22.1135	22.9371	21.5615	22.1189	21.6391	22.5507	21.4995	21.8085	21.7258	22.203	22.2676	22.5082	22.0468
XP_054998766.1;XP_054978731.1	22.3133	20.9619	22.6888	20.6949	21.195	21.4398	21.9823	22.1232	21.1586	19.4088	22.1588	22.8917	22.4032	22.4872	22.0828	19.7401	20.0277	21.4689	19.3207	21.2157	22.1776	20.8869	20.7521	21.9485
XP_054978801.1	19.9771	21.3056	22.3971	22.5639	21.7005	21.0099	19.647	21.7659	21.7353	20.9075	21.4971	21.7261	21.9076	20.7177	21.3373	21.0622	21.3163	20.2474	20.6692	21.355	21.7629	22.2773	22.0806	22.5075
XP_054978813.1	22.3802	19.3269	21.91	21.7878	20.8921	20.8474	21.4756	21.1364	22.0206	20.4347	21.5734	21.0261	20.7793	21.4002	20.1013	19.3269	21.7292	20.7369	20.2523	20.2281	22.8102	19.1779	21.4278	21.1628
XP_054978879.1;XP_054978878.1;XP_054978881.1;XP_054978880.1	19.227	19.3634	20.2565	20.4828	19.8973	18.8199	19.4105	19.498	19.7079	19.1083	20.337	20.2375	19.5129	19.1621	19.7807	20.2834	18.8551	19.7869	20.3639	21.686	21.6412	22.4311	20.7922	21.3673
XP_054978884.1	21.0152	19.6358	24.2823	25.1105	23.6569	21.4987	20.5586	22.5461	23.1123	22.7929	23.3318	24.2116	22.3135	22.3488	18.842	21.1954	23.1153	19.7963	22.6861	22.1761	21.8675	23.0401	23.0449	22.6786
XP_054978920.1;XP_054978921.1	24.1491	23.1996	24.5734	23.3302	22.9764	24.2483	24.4418	23.9166	23.5989	23.3667	23.4629	22.3887	22.7302	23.3198	23.3741	22.7659	22.4945	22.4876	23.1844	22.5371	23.6178	21.0582	23.334	23.5472
XP_054978981.1;XP_054977158.1	21.6356	17.849	19.4603	17.5793	20.2548	19.472	24.7086	19.6739	20.6691	18.967	16.6804	20.051	19.4283	17.3764	17.9052	20.0005	18.8837	18.3654	17.2193	18.3873	26.2841	20.222	20.157	19.9089
XP_054984664.1;XP_054979652.1;XP_054978995.1;XP_054996405.1;XP_054996404.1;XP_055003602.1;XP_054992314.1;XP_054994923.1	27.5808	26.9755	27.599	26.9281	27.077	27.7496	27.8858	27.5323	28.3525	27.7849	27.4613	26.9677	26.8788	26.9709	27.3122	27.2619	26.7567	26.5567	26.5845	26.4944	26.3089	26.6005	27.2074	26.9035
XP_054979050.1	21.2964	21.3117	21.7836	21.1692	20.0802	21.4554	21.5702	22.009	21.5523	20.7724	22.9789	21.2405	19.5536	19.4669	21.003	20.8227	20.5816	21.7449	23.3344	21.0345	21.1462	21.7082	21.7288	21.8226
XP_054979063.1;XP_054979064.1	17.7273	20.4222	22.5824	21.2996	20.3964	18.9329	21.4343	20.7648	21.7558	21.8125	18.975	20.691	20.3156	19.3972	19.8706	18.9055	21.1608	19.5623	19.2255	19.211	19.6536	20.9228	21.0951	21.5599
XP_054979160.1	19.8887	19.6741	23.113	24.3764	24.082	18.4235	19.0258	20.33	20.3992	18.5437	22.2363	22.9905	21.3928	22.675	19.9829	22.5862	24.945	22.0841	24.3478	21.379	23.4801	23.9285	21.9667	24.497
XP_054979165.1;XP_004621070.2;XP_054986329.1;XP_012789896.2;XP_004619205.1;XP_004619206.2;XP_055002749.1;XP_055002748.1;XP_055002747.1	21.675	21.0104	18.6917	19.8936	18.4799	19.2541	24.9117	21.1372	23.6903	20.3999	19.3616	20.0978	21.2129	19.2161	19.5417	19.1886	19.2416	18.5078	16.6246	19.6583	21.6772	18.1292	19.1202	18.4964
XP_054979183.1	21.6752	21.5851	22.1879	22.513	21.7149	20.9989	21.7124	21.8511	21.9434	20.3773	21.7416	21.8949	21.9494	21.3382	21.6572	19.372	21.7869	19.3262	21.4036	21.6073	22.581	21.5734	22.3677	21.9198
XP_054979217.1	21.9488	24.4658	24.3378	24.6734	23.553	23.8446	22.6404	23.1124	21.7792	22.9744	23.2644	20.0133	23.3054	22.9902	23.0589	21.196	21.9482	23.3496	22.0615	21.6816	23.6292	21.2925	22.5726	23.0726
XP_054979232.1;XP_054979221.1;XP_054979243.1;XP_054991609.1	26.2032	24.8946	25.9831	25.5026	24.5382	25.6956	25.9876	26.1946	25.8654	25.3025	25.5619	25.2682	25.8657	25.4014	24.5952	24.4232	24.3762	24.8347	25.3243	24.9569	24.5835	24.5314	25.759	24.9427
XP_054979276.1;XP_054979270.1;XP_054979264.1;XP_054979258.1	23.6166	18.9762	23.2604	21.7252	21.345	22.9106	23.1897	23.1593	23.3794	22.8731	22.5261	22.2588	23.155	21.9668	21.8308	21.3646	21.7745	20.8364	21.9481	21.3799	22.1465	21.3986	21.4155	21.9556
XP_054979268.1;XP_054979269.1;XP_054979267.1	23.2474	22.603	23.4292	22.6247	22.1477	22.3958	23.0608	22.6214	22.9121	22.9282	23.0448	22.1463	22.8026	22.6417	22.446	22.0131	21.9199	22.2648	22.0794	22.8724	22.2819	22.307	22.91	23.2317
XP_054979271.1;XP_054979273.1;XP_054979272.1	22.0775	21.019	22.2007	23.2761	22.3088	21.36	21.7196	21.844	22.7923	23.1049	22.9659	23.3948	21.8697	22.2528	22.3009	22.7986	19.1636	21.6067	22.0891	24.2403	23.2912	23.3703	24.5972	23.4061
XP_054979336.1;XP_054979335.1	23.2152	23.0315	23.7633	23.9463	23.0928	22.841	24.3248	23.8915	24.1204	23.2809	23.9033	23.302	23.4933	22.8825	23.423	23.2123	22.9443	22.9866	23.5284	22.8334	22.5915	23.1073	23.6047	23.5929
XP_054979424.1	21.8608	18.7109	22.6766	24.6837	24.3873	21.8003	21.3316	21.6502	19.7767	22.1902	21.9433	20.1917	19.1719	19.5809	22.3529	19.9366	19.9785	18.3771	21.2459	20.0662	21.8817	22.3325	21.3651	22.3661
XP_054979466.1;XP_054979465.1	22.8273	20.3915	22.3738	22.5215	22.6355	22.5736	23.0157	22.7471	23.0781	21.8051	23.4197	22.7494	23.0801	22.4636	21.7595	21.6732	21.9794	22.3081	22.5727	22.4448	22.0073	22.1939	22.3573	22.1728
XP_054979556.1;XP_054979555.1	25.5797	24.7453	24.8159	24.973	24.5849	25.3802	25.8405	25.5232	25.8376	25.9312	26.1441	25.4548	25.5245	25.6566	25.2663	24.6605	24.5628	25.0157	25.3437	24.8144	24.1629	24.8249	25.5412	24.848
XP_054979585.1;XP_054979584.1	21.9812	18.8257	22.6031	23.8832	22.8274	19.4346	19.7925	21.8336	21.6508	19.2976	22.3957	23.4382	20.2945	23.5539	22.0066	22.045	27.1454	22.6923	24.7533	22.4299	24.5138	27.3186	21.1661	24.7609
XP_054979587.1	26.7334	26.6905	27.3246	28.1771	28.0403	26.8833	26.6294	27.2058	26.6532	26.9991	27.7876	27.8329	27.3511	27.7036	27.0239	27.3388	28.9769	27.5054	28.2779	27.2164	27.8433	28.1843	27.3055	28.2142
XP_054979628.1	24.2044	22.7423	25.2246	25.5137	24.2591	23.3647	23.5243	24.3863	24.275	24.1742	24.9319	24.6448	24.7226	23.3531	24.217	24.498	25.1167	23.6943	25.0895	24.7921	24.9009	25.4781	24.6465	25.473
XP_054979683.1	28.6543	27.8818	28.8883	28.8285	28.3963	28.0686	28.7412	28.0616	27.9872	28.1958	28.6512	29.2181	29.0437	28.5233	29.0274	29.0304	28.1916	28.7373	28.9426	28.5519	28.4646	28.5102	29.2587	28.7888
XP_054979691.1	23.472	22.5735	24.0974	24.1469	23.041	22.9486	23.6018	23.4427	23.5366	23.4836	23.781	23.9498	24.3166	24.3329	23.703	23.6965	24.7415	23.6888	23.7303	24.1524	23.5072	24.6973	23.4	24.1395
XP_054979824.1;XP_054979825.1	23.919	23.6546	23.8139	24.5356	24.0596	23.6909	23.2991	24.0947	23.47	22.5446	23.0741	23.0486	23.6857	23.8115	23.3725	23.5998	23.3731	22.9874	23.4565	23.7893	23.6187	23.992	23.6948	24.0256
XP_054979840.1	22.5982	22.2058	21.8426	21.7006	20.748	22.3037	22.4415	22.8652	22.2484	21.8883	22.4299	21.8321	21.4537	21.8314	21.7849	21.5366	19.4302	21.482	21.3037	19.4763	18.7125	19.939	20.4468	20.6764
XP_054979913.1	22.7045	20.376	23.3435	22.8498	22.1332	22.6872	23.7563	23.8479	23.7702	22.5426	23.8199	23.9121	24.5438	23.4363	23.9658	22.5398	21.7932	23.8693	23.4638	20.8439	22.7246	21.8554	23.4139	22.7523
XP_054979920.1;XP_054979919.1;XP_054979918.1	22.6679	22.6776	22.6582	21.8767	21.8539	22.4728	23.0198	23.3418	23.5281	22.55	23.7649	22.0707	22.6419	23.1055	22.949	22.2493	23.217	23.8372	22.5743	22.6657	22.116	22.1934	23.3052	21.7661
XP_054979928.1;XP_054979926.1;XP_054979925.1;XP_054979924.1	19.3674	19.1495	21.2187	23.9475	20.6122	20.2273	19.2958	20.4207	21.127	19.1598	19.5263	21.4013	20.7486	20.6759	19.9333	20.3229	24.1129	21.1371	21.7128	19.1257	21.6313	20.9897	22.0648	22.6182
XP_054980088.1	23.1662	22.326	21.5328	22.5834	22.5239	22.1166	22.7161	22.4482	23.2466	23.8313	23.1858	23.327	22.5218	23.3376	22.9631	22.827	21.3765	22.6458	21.2774	22.9572	22.1389	22.1151	22.2646	22.5382
XP_054980092.1;XP_054992167.1;XP_054983991.1;XP_054977389.1;XP_054977388.1;XP_004620728.1;XP_004620727.1;XP_004620273.1	23.6623	23.0398	24.6889	24.5447	24.3842	23.3522	23.5506	23.7444	23.7969	23.2195	23.8813	24.3035	24.0925	23.072	23.5074	23.4574	24.7389	23.2778	24.0816	23.4038	24.6563	24.1618	24.15	24.6434
XP_054980229.1;XP_054980228.1	23.1095	22.0095	23.0919	21.9489	23.0416	22.2706	22.7072	22.5586	22.7345	22.1296	22.159	22.8958	22.6708	21.6388	21.7235	21.5849	21.1289	21.6954	22.1254	22.913	22.1999	21.8633	22.0266	21.6165
XP_054980231.1	24.3511	24.9116	24.7979	24.3183	24.3757	24.9428	24.1972	24.8462	24.4282	24.5237	25.0261	24.3334	24.9119	24.2991	24.8065	24.2891	23.7965	24.6046	24.4052	23.8753	23.4822	23.6221	24.7239	23.809
XP_054980235.1	18.9774	18.4919	21.3301	22.1233	21.8203	20.0958	18.7524	19.1908	20.5468	19.4893	20.7734	21.6934	18.9141	19.2661	18.9784	19.7919	23.397	19.0653	22.1682	20.3217	22.5472	22.4723	20.525	22.763
XP_054980450.1;XP_054980448.1;XP_054980447.1	19.801	20.4074	22.1344	20.0163	19.4649	22.9956	19.1576	23.4242	23.5588	19.2399	21.7792	18.9246	23.2063	20.3514	21.9694	18.9013	22.5147	17.3669	23.49	20.9609	19.4342	22.4712	19.4633	19.4388
XP_054980747.1	20.3417	19.4479	20.4918	19.7097	19.6791	19.2174	19.569	20.1341	21.4799	21.1433	21.6912	20.7668	19.9181	20.7122	20.2072	20.4549	19.0643	19.6626	20.5942	19.7756	18.2742	19.2212	21.5838	19.9453
XP_054980768.1	26.3985	25.8378	25.7232	24.9284	25.5258	26.8679	26.4405	26.753	25.1865	26.6701	26.1236	25.2126	25.4801	26.4478	26.6768	27.0764	26.3617	26.4162	25.6067	27.5131	27.126	25.8389	26.0333	26.1856
XP_054980779.1	19.4893	19.341	18.217	19.1716	19.2862	18.2334	18.3851	19.1775	19.9051	20.1587	19.7094	18.8541	19.6598	18.218	19.4899	18.467	18.6338	18.8068	18.4213	21.3331	20.3456	20.0346	21.5807	20.0915
XP_054980867.1;XP_004616746.1	23.337	18.3291	22.9317	22.6688	19.5072	18.8748	22.8106	20.8063	20.2672	19.3136	21.7742	20.858	20.0724	19.4716	23.6381	22.2315	18.87	22.8478	20.2521	22.5674	24.0382	22.5507	22.7182	22.6654
XP_054980963.1;XP_004611584.2	26.9826	26.5433	26.3163	26.5138	26.3733	26.5661	26.8458	26.6971	27.1457	26.3105	27.1681	26.7246	26.7832	26.473	26.2325	26.0057	25.8712	26.5077	26.2706	26.4563	26.2162	26.4152	26.5072	25.5875
XP_054980977.1;XP_054980976.1;XP_054980975.1;XP_054980974.1;XP_054980973.1;XP_054980972.1;XP_054980971.1	23.1664	22.9371	22.3092	22.0092	22.6502	21.3952	22.898	22.3022	23.3262	22.4913	22.3784	21.7121	22.7932	21.7495	20.9746	18.6373	18.5967	21.2348	17.6306	20.2135	20.3325	18.4839	22.0018	20.1275
XP_054980979.1	26.1265	25.54	25.8632	25.5812	25.3855	25.7086	26.7789	26.1701	26.0269	25.6281	26.062	25.6443	26.1739	25.6693	25.5636	25.3481	24.4327	25.3384	25.3421	25.5916	26.252	25.5849	25.6174	25.2049
XP_054981002.1	27.2165	25.8495	27.177	25.8042	26.8648	28.2155	27.3041	27.112	27.7907	27.6499	28.5293	26.606	26.2949	26.1676	27.5809	28.1079	26.1504	26.6256	26.8882	27.3917	26.6964	26.7191	26.382	27.5897
XP_054981008.1;XP_054981009.1;XP_054981010.1	20.0925	19.0917	21.3597	20.7007	21.0578	22.4334	21.4277	21.6693	22.318	22.2629	21.6517	21.165	21.1554	21.4024	19.8098	21.2515	20.2357	20.062	18.4125	19.0893	20.9762	18.7048	21.5645	21.3743
XP_054981076.1	23.331	23.6664	22.9025	23.976	23.0558	23.4823	23.9421	23.5295	24.0528	23.3414	23.7154	23.3661	23.4679	23.1693	23.2108	22.6279	24.3147	22.6478	23.3643	22.3307	22.8827	23.0169	22.4907	23.5663
XP_054981081.1	24.6922	23.9208	24.5335	24.1404	24.1911	24.7699	24.2659	23.8658	24.8972	25.2878	24.739	24.5262	24.9583	24.2496	25.5533	24.5993	24.066	25.36	24.5762	24.8179	23.3875	23.3286	24.4396	24.1669
XP_054981164.1;XP_054985617.1;XP_054983576.1;XP_054980338.1;XP_054980335.1;XP_054980354.1;XP_054985560.1;XP_054980336.1;XP_054985598.1;XP_054980339.1;XP_054981012.1	22.8715	20.4867	23.3427	19.524	19.6484	22.0092	22.2962	23.1604	23.244	20.0406	23.1647	22.6667	22.8886	18.5284	22.125	22.6671	21.9747	19.8897	22.1325	20.0647	22.898	22.3601	23.0984	21.4791
XP_054981306.1;XP_054981305.1	19.3043	17.7286	19.8943	20.3277	20.2987	19.4411	18.8028	19.2258	19.9739	19.6806	19.21	19.6606	18.9913	19.8261	19.444	18.6437	19.4713	20.1274	19.0527	18.7477	20.0843	20.9734	19.7327	20.0284
XP_054981316.1;XP_054981315.1	21.2855	18.1184	21.9747	20.4784	19.0744	19.2091	19.4374	20.258	19.9992	19.7692	22.1619	21.5595	21.34	19.522	19.2951	18.5162	20.2988	19.4971	18.8413	24.2833	22.169	19.3998	22.2048	21.1281
XP_054981333.1;XP_054981332.1	24.765	23.6996	24.4616	24.0215	24.8068	24.8407	25.4419	24.5305	24.9642	24.7369	23.9722	24.7646	24.7033	23.7623	23.5345	23.3215	23.2388	24.3952	24.5097	23.5212	23.7461	23.7039	24.0849	22.947
XP_054981423.1	24.0542	23.1214	23.9306	22.534	21.5677	25.1871	24.803	23.9784	23.3412	24.8591	23.3092	21.1483	22.0625	25.2803	24.6759	24.5209	22.7856	22.4125	22.9568	22.7721	24.9663	21.2971	24.3024	24.9989
XP_054981591.1;XP_054996434.1	22.492	21.5628	22.4103	22.6519	22.594	21.3476	21.7971	21.9869	22.0599	21.4424	21.36	22.2777	22.1633	21.4542	21.9214	21.4474	22.7654	21.3325	21.5956	21.414	22.7799	21.8125	21.9732	22.37
XP_054981632.1	25.0759	24.4169	24.8438	24.275	24.0678	24.5799	24.8893	24.4192	24.5812	24.2791	23.8841	23.9194	24.0527	23.6512	24.436	23.7859	22.764	23.5291	24.1669	23.4456	23.969	23.6037	24.2758	24.3004
XP_054981636.1;XP_054981635.1	22.5507	20.1666	19.68	20.3972	19.1738	21.3831	21.4468	22.7215	21.3893	20.125	19.7901	20.9298	21.9899	20.6132	21.577	20.0713	19.4693	19.5663	21.9302	21.1016	20.4049	20.321	24.265	20.0991
XP_054981663.1	20.43	20.6812	20.4535	19.5974	19.1346	20.1673	21.6921	22.013	22.5592	21.2032	21.0816	19.4434	21.0931	20.9761	22.3199	21.8495	20.4421	20.6498	20.1853	19.4872	23.6003	21.8404	22.3896	22.2646
XP_054981737.1;XP_054981736.1;XP_054981735.1	20.9138	20.0872	22.3571	22.0088	21.2938	21.5276	21.9278	22.2331	22.5986	21.3634	21.6464	21.4003	21.2496	20.895	21.473	19.4796	23.7873	20.7591	21.4384	19.3487	21.6907	22.0312	21.6753	22.3133
XP_054981782.1;XP_054981781.1;XP_054981780.1;XP_054981779.1;XP_054981778.1;XP_054981777.1;XP_054981776.1;XP_054981775.1	23.0335	22.9413	21.9347	22.0005	22.112	23.0708	23.2377	23.406	22.7321	22.6644	23.163	23.4772	23.3019	23.1755	22.6491	22.281	21.9562	22.7149	21.6513	22.7396	23.0113	22.2996	22.5452	22.5888
XP_054981847.1	22.4799	22.4267	23.5876	23.4448	23.5259	22.9784	22.9963	22.888	23.2122	23.0833	23.434	23.7467	23.307	23.267	23.0878	23.7632	23.9743	23.1458	23.9464	23.123	23.6856	23.939	23.8492	24.1194
XP_054981946.1;XP_054981947.1;XP_054981943.1	21.6288	21.3699	22.0397	21.6614	21.8542	21.1136	22.0131	20.036	23.0588	22.5234	22.1321	18.788	22.1812	21.2004	21.9056	19.0655	21.2825	20.9557	19.5076	20.6104	21.8493	20.9999	23.0056	21.7058
XP_054981990.1;XP_054981989.1	23.8397	22.9186	24.1135	23.518	23.3969	23.2354	24.0129	24.075	23.9424	23.1592	24.0492	23.5047	23.51	23.0602	23.3897	22.9721	23.1187	23.3556	23.3173	23.5979	24.1212	23.2871	23.9116	24.1237
XP_054981995.1	21.9251	20.5275	22.7989	22.356	22.0747	20.6277	21.4563	21.4891	21.9412	20.567	21.667	22.0138	22.4833	20.9864	20.9825	20.6906	23.5705	20.848	22.0922	21.1103	22.9355	22.9447	22.5515	23.7317
XP_054982024.1;XP_012789165.2	21.6348	23.0021	23.9152	23.5006	23.3084	23.331	22.9534	23.9232	23.4524	23.031	24.0127	23.1412	23.4003	23.0835	22.7645	22.3648	23.4987	23.7523	23.4664	23.357	23.8439	23.1106	23.2897	23.7023
XP_054982036.1	22.7342	21.626	22.0897	20.4916	21.0815	22.3553	22.4284	22.8329	22.6834	20.6238	22.6404	22.3853	22.6084	19.7721	22.8583	20.9799	21.1667	21.5311	21.6301	20.9316	21.1977	21.2346	22.2726	21.9673
XP_054982104.1;XP_054982253.1;XP_054977227.1	20.5585	18.4637	22.1164	24.4819	23.7944	18.7554	19.4719	19.8205	21.3992	19.0685	21.099	21.0025	18.6423	21.498	19.9204	21.9507	24.0671	21.6285	23.7694	18.4796	22.447	22.668	21.5791	23.5111
XP_054982198.1;XP_054982197.1	23.7761	22.2703	24.0918	24.6134	24.7414	23.0608	23.5371	23.7119	23.0287	23.3026	24.1432	24.2957	23.8483	23.8791	23.9476	24.5255	25.5815	24.4238	25.0619	23.9244	24.7526	24.729	24.4744	25.3221
XP_054982206.1;XP_054982208.1;XP_054982207.1	21.2649	19.8781	22.2579	21.5727	21.6813	22.1352	22.1403	22.6393	22.3854	21.3252	22.976	22.478	22.5328	21.5789	21.7796	21.322	21.4317	21.2581	20.9388	21.3334	19.7431	19.8248	22.1993	20.6894
XP_054982297.1	24.5965	24.7721	23.1131	24.7002	24.2139	24.3695	24.8846	25.3217	24.7893	23.6853	24.9171	24.0418	24.5185	25.0377	24.2608	23.2162	24.4881	23.9265	24.095	23.0271	23.9916	24.8446	24.4229	23.1674
XP_054982328.1	24.704	24.0763	25.0596	24.715	24.7714	24.4969	24.4223	24.5975	24.0645	24.2402	23.6153	23.9285	24.0285	24.0521	23.6089	24.6087	24.4267	23.9231	23.6812	24.6507	25.3893	24.4484	24.3772	24.9819
XP_054982337.1;XP_054982336.1;XP_004609553.1	22.4077	19.0479	23.1796	21.7636	22.6441	19.1092	21.3273	21.4883	21.167	22.1768	22.913	21.9463	21.7974	20.2014	22.4138	21.6498	21.2372	22.4471	22.0893	21.6948	22.8025	22.8152	21.2924	23.2502
XP_054982365.1;XP_054982363.1;XP_054982362.1	20.8358	20.5761	19.4221	20.4641	17.8724	22.5949	20.1037	20.2824	21.4162	21.1345	21.8645	21.2266	19.3269	18.6588	22.6148	21.5167	21.9479	21.4262	21.5583	22.2621	19.0668	22.4652	21.8746	22.2755
XP_054982430.1;XP_054982431.1	27.5795	26.6087	26.9766	26.2673	26.1229	27.4037	27.8571	27.5756	27.8931	27.4898	28.3385	27.4402	27.1835	26.8435	27.4197	26.9876	27.0897	26.742	27.4443	26.3047	26.4752	26.8055	27.4285	26.7681
XP_054982433.1	23.5244	20.175	22.5806	21.5735	21.4197	20.6232	23.4105	22.3087	21.4783	21.4193	22.7782	21.2705	21.8338	21.4408	22.5205	22.3535	19.7702	22.2159	22.0452	21.9922	22.5894	21.0884	22.2861	21.8543
XP_054982434.1	23.5992	22.4228	24.1064	22.9319	22.3896	22.4653	23.1438	22.6	22.6377	22.8453	23.6468	22.7792	23.8537	22.3939	22.651	22.7466	21.6306	22.4344	22.5294	22.4665	22.3379	21.3055	23.5223	22.7014
XP_054982435.1	24.1021	23.8163	22.8511	23.586	23.9604	25.2379	24.6725	25.3394	23.3838	25.5888	24.3461	22.738	22.98	23.6923	24.9965	25.1728	24.0132	24.2293	23.7344	25.203	25.7176	23.6891	23.7695	25.0799
XP_054982441.1;XP_054982440.1	19.3348	19.629	20.3604	19.5471	19.999	19.7557	19.6745	18.8005	19.3552	18.7857	19.9689	20.6013	19.9311	18.811	21.6211	20.9602	20.4977	19.3947	19.7828	20.6861	21.9175	19.8263	20.5525	20.3909
XP_054987160.1;XP_054987159.1;XP_054987158.1;XP_054982450.1;XP_054987157.1;XP_054992690.1;XP_054998882.1;XP_054983666.1	21.199	21.9608	21.9789	21.6279	21.81	21.2996	22.7416	22.6806	20.7702	19.9456	21.8499	23.6532	21.725	22.0932	22.5125	22.5656	22.9669	22.0067	22.688	20.8967	22.6843	24.2815	21.3355	22.6823
XP_054982473.1;XP_054982472.1;XP_054982471.1	23.7528	23.1926	23.9646	23.3657	23.1081	23.2884	23.8639	23.9556	24.0433	23.3033	24.9769	23.7182	23.9231	23.7761	23.7216	23.5139	22.9113	23.2422	23.6119	22.8845	23.4224	23.6354	24.2638	23.7108
XP_054982488.1;XP_054982487.1	21.6629	19.6145	21.0705	21.5264	21.9876	21.1869	21.0203	21.5937	20.447	21.0362	21.3526	21.377	21.0909	22.0299	21.1405	22.0062	22.0396	21.871	22.3294	23.2867	22.3425	22.7989	20.796	23.609
XP_054982513.1;XP_054982512.1;XP_054982511.1;XP_054982510.1;XP_054982508.1;XP_054982509.1;XP_054982507.1;XP_054982506.1	21.7812	21.5993	21.2579	21.2289	19.7873	20.8817	20.557	20.1452	20.8746	18.3171	19.7184	20.8143	21.1316	19.1022	21.6305	20.7487	19.4346	20.4339	20.8484	19.7454	20.4309	20.7396	21.572	20.3553
XP_054982580.1	21.7862	18.3315	22.0437	21.9058	22.23	21.4049	21.7289	21.5785	21.1477	20.6171	21.2098	21.5323	21.45	20.5653	20.9133	19.932	21.5237	21.9412	20.4772	22.1656	22.7058	21.5186	22.4039	21.8161
XP_054982581.1	22.3727	22.7969	22.1887	20.9464	21.9903	22.6753	21.8067	20.9321	21.3564	21.1457	20.8749	21.1828	21.5359	20.5038	20.9481	18.6463	20.4676	20.5118	20.6897	20.6594	21.5497	21.6755	20.5426	21.9483
XP_054982617.1;XP_054982616.1;XP_054982614.1;XP_054982613.1	20.9809	18.7553	20.0613	18.1316	18.611	21.3531	20.3407	21.8073	21.2827	19.2817	19.8357	22.1134	20.0074	19.4679	18.9926	19.8901	18.7131	20.9659	19.8849	19.0563	21.9248	19.4706	19.1565	20.6167
XP_054982622.1;XP_054982623.1;XP_054975403.1;XP_004616402.1	21.9583	20.6845	23.9449	24.0817	24.1778	21.104	20.6583	20.9368	20.2812	22.2102	21.7658	23.6867	22.8709	21.9634	21.8586	22.9781	24.4432	21.1789	23.6968	22.8007	24.1902	24.9679	23.2996	23.5268
XP_054982632.1	22.9821	22.1574	23.5778	23.9944	23.6765	21.7414	22.8355	23.3257	23.6008	23.481	23.7482	24.0702	22.9648	23.2684	23.3952	23.0598	23.7175	23.2417	23.2755	23.3192	23.2996	24.0803	23.0498	23.667
XP_054982644.1;XP_054982643.1;XP_054982642.1;XP_054982641.1;XP_054982640.1;XP_054982645.1;XP_054982639.1;XP_054982638.1;XP_054982636.1;XP_054982635.1	21.0354	18.7734	21.7416	22.5922	21.9379	20.5658	21.1172	21.932	20.9049	20.0776	21.4923	21.0634	21.2162	20.9542	21.2004	21.0043	20.3013	20.2447	20.3193	19.3636	20.322	21.1544	21.6032	21.275
XP_054982707.1	21.4612	19.545	18.143	20.1892	20.9096	22.442	25.0486	22.4691	23.2095	21.3697	20.0973	21.8527	21.3748	20.651	19.6849	20.5758	20.6395	18.612	18.0943	18.959	26.0909	23.9509	21.0842	22.135
XP_054982788.1;XP_054982787.1	21.8734	21.4379	21.929	21.0342	19.9992	21.3384	22.0085	20.5562	21.1739	21.0118	20.6939	20.4985	19.6569	20.1636	22.3535	22.1937	19.8171	20.4377	21.8436	20.7287	21.8562	20.6899	20.0759	21.568
XP_054982834.1	20.3521	18.2224	22.0243	22.3419	18.8498	19.0889	21.6551	22.4244	22.6301	18.7053	23.2066	21.9915	23.227	18.8123	22.9399	21.1225	19.7581	22.75	19.8254	19.5684	19.2145	21.9216	23.2911	22.0909
XP_054982846.1;XP_054996749.1;XP_054996747.1;XP_054996746.1;XP_054996748.1;XP_054996745.1;XP_054996744.1;XP_054996742.1;XP_054996741.1;XP_054996740.1;XP_054996739.1;XP_054996738.1	22.3988	21.7852	19.819	22.2334	20.778	23.6257	19.0913	22.4162	21.795	21.7543	22.3974	23.0328	23.0331	21.5024	21.9532	22.8849	22.2773	23.2105	23.5248	23.7928	23.0073	22.6518	24.2624	23.9525
XP_054982847.1	21.2824	19.1569	21.152	21.8543	21.5132	21.053	19.7128	20.9678	19.3993	18.938	19.1555	19.9108	18.9857	19.5551	20.3952	21.4573	20.1482	19.3562	19.3905	21.2439	22.2359	22.4605	21.7426	22.1432
XP_054982859.1;XP_054982858.1;XP_054982857.1	23.4368	24.036	24.4316	24.6449	25.0732	23.5755	23.5323	24.0635	24.0703	22.8456	24.4125	24.0723	24.0916	23.7012	23.8696	23.9041	25.4848	23.9929	24.1848	23.7655	22.7553	23.3481	24.0284	24.4976
XP_054982928.1	23.0636	21.2788	23.2825	23.0226	23.3381	20.4481	19.3608	22.0601	21.7963	20.6546	20.7835	22.232	21.3919	21.2753	23.5638	18.954	24.2345	20.5811	23.0595	20.3657	23.2056	22.742	22.8692	23.6656
XP_054982938.1;XP_054982937.1	24.9218	24.3517	24.458	23.8376	24.2814	24.593	24.8033	24.7915	24.4541	24.483	24.3568	24.169	24.4024	24.1723	24.3151	24.1139	23.4581	24.3423	24.1528	24.0621	23.8	23.6726	24.0132	23.9318
XP_054983023.1;XP_054991218.1;XP_054991217.1;XP_054991215.1	24.4549	22.3465	24.8369	24.5731	24.5906	24.7647	24.8972	25.6909	24.7909	23.4556	24.7481	25.4663	25.0118	22.6202	23.3403	24.3137	25.0468	23.1323	24.8446	24.829	25.3145	24.7579	25.6333	25.5179
XP_054983114.1	23.8102	21.8304	23.7911	21.9652	22.8965	22.9132	23.7921	23.4257	23.9687	24.0323	24.3867	24.0871	23.7919	23.5314	23.479	22.5013	22.5661	23.3685	22.6496	22.4124	23.149	23.2055	24.3919	23.024
XP_054983162.1	23.4389	23.4889	22.9341	22.2476	22.6666	23.6522	23.9742	24.1658	23.48	22.4748	24.6972	23.2782	23.9573	23.6499	22.4733	21.6333	23.543	23.9377	24.2139	21.6317	21.9841	22.34	23.2901	21.8513
XP_054983178.1	18.8093	19.4889	18.5114	19.9287	19.4148	19.3953	20.6058	19.676	18.4437	19.054	20.1361	20.9881	18.3981	19.1745	17.2008	18.8652	17.1001	18.4699	19.5976	18.8696	20.068	18.6427	20.5372	19.6962
XP_054983197.1	23.3648	21.1985	22.9384	21.7663	21.3011	21.3429	22.6136	21.5061	21.7967	18.1301	22.1354	21.6773	21.9611	18.7274	20.9179	21.3845	19.4483	21.2583	21.2423	20.0777	20.9532	21.3293	21.3232	21.3315
XP_054983226.1;XP_054983225.1;XP_054983224.1	25.0596	23.9449	24.9291	24.0015	23.8737	24.0391	23.3122	23.4574	24.2532	24.1067	24.2263	24.1195	24.0152	22.9396	25.2233	25.0532	23.4751	24.4318	24.2769	24.9755	24.8187	24.9433	24.7588	24.7643
XP_054983231.1	22.0724	18.4756	23.7018	22.4921	22.712	21.3636	21.6299	22.7528	22.1661	21.2293	23.688	22.7738	22.8643	22.2651	23.1898	21.7159	21.8007	21.4689	22.4461	22.521	22.6623	22.6287	22.7825	21.9049
XP_054983267.1	23.2925	19.8789	22.0611	20.9463	20.9524	21.5105	22.251	21.1162	21.2675	22.223	22.0471	20.9658	21.1254	19.3452	23.0076	21.2356	22.6728	21.7589	21.7702	20.9086	20.0688	20.6931	21.445	21.2214
XP_054983346.1;XP_054993846.1;XP_054993844.1;XP_054993845.1;XP_054993843.1;XP_004614318.2	24.4042	24.4517	26.064	24.8699	25.1444	24.6434	24.7097	24.4627	25.1821	25.557	25.4859	25.0944	25.9174	25.4669	25.6427	26.8777	25.7212	26.5704	26.8611	26.8716	27.6858	26.2658	24.8992	26.81
XP_054983452.1	24.2186	25.4789	24.5366	25.042	24.5964	24.6829	25.6715	25.951	25.5685	24.7125	26.3869	23.5153	24.127	19.7497	25.1221	24.2515	23.5259	24.0799	24.5111	20.1792	20.199	24.6041	25.0245	24.0674
XP_054983562.1;XP_054983561.1	20.2633	18.8397	19.1163	19.6993	21.2723	20.6039	21.285	21.7188	21.8645	19.2509	21.8673	19.1317	18.6372	19.6183	20.2853	19.8329	18.9486	20.5574	19.3695	18.5201	18.0606	19.9239	20.2425	21.0613
XP_054983574.1;XP_054982577.1;XP_054982579.1;XP_054984880.1;XP_054984879.1	22.193	21.1529	23.2018	20.7486	22.9989	21.5327	21.9406	22.1551	22.2226	20.7565	21.3994	23.2651	21.5563	21.0909	22.3236	20.1051	21.8268	18.9651	20.3979	19.3198	23.8528	20.1292	22.1487	21.0222
XP_054983591.1	23.3268	21.6768	22.8704	22.127	22.6757	21.7913	22.0273	22.5358	23.0283	23.1809	23.824	22.5558	22.3948	22.5529	21.9479	21.0362	22.5547	22.232	22.5944	20.5467	19.7534	22.1941	22.5308	23.4751
XP_054983597.1	22.8889	20.933	20.1531	19.6557	18.8263	21.518	23.2026	22.7132	23.2481	21.3967	21.597	22.9187	22.6966	22.75	23.438	20.6501	21.3261	22.5887	22.2491	21.465	22.0863	21.3855	22.0909	21.4915
XP_054983605.1;XP_054982411.1;XP_054982410.1;XP_054982409.1;XP_054982408.1;XP_054982407.1;XP_054982406.1;XP_054982405.1;XP_054982404.1	26.371	25.6584	26.382	25.8579	25.8927	26.6661	26.6259	26.6529	27.1174	26.229	26.4979	26.036	26.1932	25.976	25.5307	25.1082	25.1938	26.0122	25.8508	25.0119	25.4636	25.9379	25.7133	26.2102
XP_054983638.1	25.6284	25.7279	24.5902	25.118	25.9095	26.2097	25.4967	25.6172	25.144	26.2716	25.2674	24.7463	24.8963	25.2116	25.2155	26.2217	24.3549	24.8192	25.1199	25.9314	26.4233	24.5676	25.0876	27.2395
XP_054983667.1;CON__P01045-1;CON__Q2KJ62;CON__P01044-1	25.634	24.6269	25.1869	24.1987	25.1927	25.4917	24.2863	24.4998	24.985	25.8945	23.8926	24.3364	24.2134	24.0331	24.3261	24.9604	24.6944	24.8465	24.256	26.3218	24.9296	24.8909	24.8483	25.1251
XP_054983675.1;XP_054983674.1	24.4763	24.3175	25.4567	24.2164	23.7591	24.5797	24.8585	25.106	25.0518	23.8141	24.435	24.7158	25.2236	24.4281	24.7869	23.9615	23.63	24.0964	24.3035	23.3408	23.0206	23.3719	23.9708	24.348
XP_054983715.1;XP_054977055.1	28.2364	27.6479	28.1583	27.7426	27.5525	27.5811	28.2166	28.0099	27.6552	27.4825	27.5586	27.3154	27.6305	27.0052	27.1503	26.7236	26.5904	26.7507	26.9401	25.9125	26.7317	26.1331	26.8333	26.741
XP_054983757.1	24.3959	24.1406	24.6493	24.0418	23.2398	24.0832	24.1409	24.215	24.2303	22.7255	24.5533	24.4173	23.8446	23.5465	24.0978	24.0737	22.9183	23.8275	23.385	24.0416	23.3865	24.3294	23.6654	23.5162
XP_054983818.1	22.6474	21.2241	21.6499	21.9188	21.5287	22.2023	22.3746	22.6069	22.8044	22.3271	22.7355	21.9172	21.3499	21.7615	21.7499	21.2182	21.423	21.2131	21.9281	21.3693	20.6877	21.3164	20.8654	20.2485
XP_054983835.1	20.5205	20.5945	20.9889	19.6123	20.5691	21.0278	20.8017	20.6865	20.1863	19.8726	20.9176	20.5779	21.5687	20.7573	20.2479	20.9218	20.8766	17.8989	21.4745	20.0815	20.4636	20.4652	20.3736	21.0545
XP_054983896.1;XP_054980558.1;CON__H-INV:HIT000015463;XP_054988230.1;XP_054988231.1;CON__A2A5Y0;CON__Q92764;XP_054988449.1;CON__Q14532;CON__A2AB72;CON__O76015;CON__O76013;XP_004608819.2;CON__O76014;CON__REFSEQ:XP_986630	24.4469	25.2299	26.3561	27.8585	26.7438	25.0623	25.2791	26.9276	26.2705	25.334	27.1833	26.1659	26.0219	26.3032	27.5528	26.6927	29.3555	26.163	26.1806	25.2586	28.2069	27.6652	26.9496	27.6501
XP_054983925.1;XP_054983926.1	25.0368	23.698	24.112	22.9814	24.6675	23.5708	23.7353	24.5519	23.7526	23.4478	24.4446	24.0646	24.1129	23.3882	25.8255	22.9782	25.8057	23.6411	23.4294	23.6125	23.4278	23.4903	23.5476	23.9179
XP_054983928.1	23.1304	21.151	23.4406	24.6844	23.5865	22.1735	23.6235	23.0761	23.1889	21.7112	23.1684	23.964	23.8356	21.7545	23.1338	23.5596	24.0794	23.3034	24.0459	24.6183	23.8481	24.8035	23.2901	23.9131
XP_054984047.1	25.3258	24.2478	24.0081	22.9871	25.5197	25.8863	24.1048	24.7708	24.5267	24.9251	23.7079	23.5943	24.379	23.492	24.0195	24.0992	25.7131	24.6816	24.1239	24.9523	24.4399	24.1106	24.814	25.0073
XP_054984106.1	18.9071	19.7752	21.1938	20.7736	20.8029	18.8339	19.7462	21.0601	21.1878	21.2929	19.3563	20.9253	21.1796	20.7503	21.3657	21.9418	20.8921	20.622	21.5327	19.4338	20.8367	20.9594	20.9267	20.7767
XP_054984113.1;XP_054984112.1;XP_054977606.1;XP_012790092.2	23.5544	23.3291	23.0196	23.3288	23.4262	23.1801	23.3977	23.1743	23.2727	19.7345	23.2963	23.4794	23.8435	23.5129	22.7953	22.5021	22.0986	24.5094	22.5074	25.9199	23.671	24.3562	22.72	23.334
XP_054984125.1;XP_054984124.1;XP_054984123.1	20.8348	20.8763	19.7775	19.6681	19.084	21.053	21.3142	20.9921	21.061	21.3114	21.7514	19.9414	18.9367	20.7368	20.3176	18.4367	18.8028	20.8995	20.052	20.5622	20.2068	18.8707	19.0842	19.3512
XP_054984130.1	20.0294	18.748	20.394	21.7704	22.1056	19.1023	20.7408	20.4135	19.9031	18.6283	20.9927	18.7912	18.7299	18.7567	20.3661	19.5217	19.4213	19.9101	19.614	18.7982	19.884	18.6596	20.5355	21.3664
XP_054984147.1;XP_054984146.1;XP_054984145.1	24.3258	24.6399	26.5405	25.3827	25.4173	23.6521	24.4236	24.7864	25.0856	24.703	28.1782	26.6338	26.9742	26.4389	27.7427	26.1744	25.6753	26.4777	26.1278	24.7137	24.9125	24.3632	27.8676	25.6313
XP_054984148.1	19.7416	18.3003	21.2268	20.3193	20.14	18.6989	19.7386	19.646	19.5555	19.7933	21.5455	20.6337	21.3044	19.6599	21.7222	21.4789	18.8353	20.3206	20.1863	19.3253	20.5109	20.3152	22.2399	19.5889
XP_054984154.1;XP_054984153.1	25.945	25.4201	26.1039	26.5793	25.5576	25.9591	25.3734	26.5976	26.0092	26.2002	26.4653	25.8711	26.0565	25.6432	25.6789	25.1162	26.1124	26.6638	25.2465	26.5197	25.6603	27.5196	25.9848	25.6028
XP_054984179.1;XP_054984178.1;XP_054984177.1;XP_054984176.1;XP_054984175.1	18.6731	17.8894	21.4494	21.2985	19.7774	18.6347	21.0325	21.2319	22.2675	21.4822	20.7424	21.4092	21.8524	21.2385	21.4306	19.6151	20.1791	21.0158	20.3705	18.721	20.8048	19.1059	23.6211	20.3767
XP_054984212.1	26.4848	26.1586	26.1527	26.5082	24.8791	27.1822	26.2779	26.6095	26.4061	26.4165	24.2145	24.9999	24.9751	25.6824	24.6038	25.6978	24.0689	25.1166	24.5155	25.4342	24.6951	23.7595	26.2046	24.9422
XP_054984223.1;XP_054984221.1;XP_054984222.1;XP_054984224.1	20.6609	19.1333	19.5385	21.2142	22.2506	20.0807	19.4412	21.9466	20.5092	19.0919	20.9009	19.2801	20.5213	19.1997	22.0066	19.671	22.4144	19.1593	21.8012	18.5557	20.2874	22.8614	21.221	22.7962
XP_054984300.1	19.6382	18.8516	20.6847	19.8263	20.5829	19.7418	21.1793	20.2262	19.7295	19.4154	19.4127	18.4748	19.8746	19.4951	20.1889	19.6589	19.5295	18.3997	20.2959	19.6631	20.3951	18.8425	19.0439	20.2056
XP_054984303.1	22.8615	22.1009	23.2251	22.7687	22.6291	23.2337	22.6788	22.5095	22.661	21.7117	22.6907	24.6149	22.5438	22.9831	23.0164	23.813	23.8366	22.7822	21.5121	21.5305	21.9202	21.9113	23.2815	23.1364
XP_054984316.1	25.3847	25.7818	25.7097	25.0978	26.2991	26.6192	26.2112	26.0648	26.976	28.2246	25.498	26.0958	25.9055	26.4503	26.5008	27.0359	25.5295	26.0141	25.309	27.1066	25.5777	25.7241	26.7012	26.1665
XP_054984322.1;XP_054984321.1;XP_004618132.1	24.0258	24.4273	23.8524	22.6493	21.837	24.0142	23.8939	24.4308	23.4846	23.4389	23.6227	20.3804	23.634	23.1691	23.2798	23.3284	23.1102	22.6975	23.6471	23.2891	23.1989	18.9378	23.2162	22.8735
XP_054984383.1	19.6343	18.8717	19.4674	23.9128	20.2353	18.5453	20.5391	18.9718	21.2459	20.1702	19.8135	19.367	19.4944	20.3999	18.7052	19.7196	20.9191	20.3721	20.6787	20.5264	20.3008	19.8229	20.5385	20.7759
XP_054984384.1	19.953	19.3502	19.2404	19.1736	19.2914	24.2507	20.0083	21.1986	21.6506	19.6068	19.4095	18.8136	19.5655	20.3319	20.8661	21.562	19.7857	21.6058	18.5872	20.1157	19.4669	19.7105	20.4496	20.4356
XP_054984433.1	22.5753	24.4861	22.4712	22.952	22.9266	22.6061	22.9082	22.5606	23.1615	22.858	23.4442	23.3198	23.4951	22.879	22.647	22.5248	23.3842	23.2322	23.8129	22.3085	22.7977	22.8063	23.0275	22.6078
XP_054984476.1;XP_054984475.1;XP_054984474.1;XP_054984473.1;XP_054984472.1	21.3815	22.4395	19.8957	22.7067	22.203	18.8477	19.2348	19.5875	20.0845	19.0691	18.7014	19.414	18.8001	18.8072	19.6699	19.391	19.3722	18.8341	19.3217	20.5614	20.1949	17.158	20.1993	20.2422
XP_054984483.1	23.3473	23.7416	25.2187	24.8641	24.6532	23.9893	23.4516	24.0425	23.7827	23.9198	24.4477	24.6264	24.2743	24.0408	24.0909	23.9282	23.44	21.4693	22.6399	24.0595	24.0878	22.9695	24.1885	22.6706
XP_054984542.1;XP_054984541.1	23.3663	23.1068	23.2807	22.7951	23.3647	22.176	21.6818	23.1407	22.6406	23.3857	22.3227	22.3823	22.0997	22.8106	23.0168	23.3419	21.7916	22.6126	22.7947	23.7874	22.5779	22.7697	22.5877	21.3902
XP_054984609.1;XP_004605789.2;XP_054996042.1;XP_054996041.1;XP_054996040.1;XP_054996039.1;XP_054996038.1;XP_054996037.1;XP_054995438.1;XP_054995439.1;XP_054977529.1;XP_054977528.1;XP_004620964.3;XP_004611702.1	23.7519	22.8291	24.4118	23.8994	23.3998	22.9682	24.2456	24.4782	24.1962	20.5953	23.9673	23.6601	23.9113	23.7121	24.0114	23.2107	23.7316	23.7419	23.4218	22.9699	23.786	23.4015	23.8733	23.6146
XP_054984623.1	22.2796	21.5174	18.3667	22.0698	21.18	19.7838	21.4213	21.6371	20.6856	18.8355	22.0072	20.7783	21.9164	19.6128	21.2547	20.8631	19.2698	22.5251	21.9549	20.2389	20.5549	22.289	20.6676	20.2265
XP_054984748.1;XP_054984747.1;XP_054984746.1	22.0894	21.9075	24.1087	24.5692	24.1497	23.2254	22.183	23.4108	22.9775	21.3966	22.3624	23.1456	22.54	22.1785	22.428	23.2778	23.8454	23.1536	23.5315	23.2503	23.1422	23.6767	23.1563	24.5133
XP_054984770.1;XP_054984769.1;XP_054984768.1	24.2666	23.9281	24.5318	23.7576	23.92	24.1526	23.8807	24.2946	24.1798	23.9266	24.1318	23.9608	23.9289	23.3924	23.7669	23.6162	22.9447	23.6541	23.8918	23.6893	23.1097	23.6415	23.105	23.487
XP_054984823.1	19.8762	20.0825	20.603	20.8739	20.9523	19.4689	20.1454	20.2229	20.2974	20.9895	21.2033	20.3243	20.771	19.4971	21.0634	20.0181	20.573	20.7412	20.3684	21.1	20.93	18.8759	21.3621	20.6269
XP_054984886.1	22.3284	20.1992	18.5854	19.973	20.7069	21.4666	20.1671	20.2348	19.1607	19.4176	21.9707	20.3346	20.2801	19.8096	19.0664	19.3602	19.9543	19.5264	19.3628	19.7393	19.3115	18.833	19.9493	20.2126
XP_054984899.1;XP_004621990.2;XP_054985578.1;XP_054983255.1;XP_054984887.1;XP_004618106.1;XP_054983256.1;XP_054984901.1;XP_054985951.1;XP_054984900.1;XP_054983254.1;XP_054983258.1;XP_054983257.1;XP_012791271.2;XP_012791262.1;XP_004621943.3;XP_012791272.2;XP_054983245.1;XP_054983246.1;XP_054984888.1;XP_004621953.2;XP_004622313.2;XP_054984904.1;XP_054981371.1	30.6605	29.3036	30.9507	30.3676	29.8905	29.7401	30.6823	30.128	29.3538	29.4604	30.1867	30.4419	30.6114	30.2066	29.7934	29.7107	29.1761	30.002	29.8717	28.8603	29.7362	28.8609	29.1396	29.2276
XP_054984923.1	19.4802	18.898	20.9652	20.6425	19.3832	18.7108	20.6654	21.2097	21.6624	21.9517	22.9849	22.7358	21.5598	19.679	21.7527	21.9088	20.788	21.4776	21.3403	22.9635	22.8229	21.9301	22.4515	21.6151
XP_054984967.1	21.4124	21.6271	22.0343	19.6178	21.9251	20.9614	21.6413	22.0661	21.6111	21.6472	21.4506	21.4327	21.8976	21.1711	21.5788	20.6371	20.806	19.9782	20.7812	19.1697	20.9062	19.9372	20.9328	20.8838
XP_054984994.1	20.088	20.5482	19.2602	19.237	20.6913	18.866	18.7528	19.7225	19.343	20.2128	20.0675	20.6442	18.9329	19.198	19.4251	19.1812	20.7139	20.5702	20.93	19.2176	21.1268	22.2448	20.1163	21.7943
XP_054985062.1	20.0564	18.661	18.6522	20.1667	18.509	18.7592	24.828	21.4578	19.1351	21.1687	19.6046	21.3388	18.6628	21.6566	18.8065	19.9846	19.4267	18.3052	20.1914	19.8137	20.643	20.0391	19.0388	18.317
XP_054985064.1;XP_054984766.1;XP_054999549.1	25.5148	25.1502	26.0233	25.0948	24.8194	25.365	25.7609	25.6665	25.4169	25.3412	25.8216	25.2247	25.2779	24.6488	25.5644	24.7564	24.276	24.71	24.7902	24.7038	25.2761	24.0304	25.348	24.8203
XP_054985074.1;XP_054985073.1	22.1156	18.3177	22.472	23.412	23.1215	22.0652	22.459	22.6692	21.5921	21.7797	20.6277	23.1153	21.8142	22.7494	22.0304	22.6545	22.6909	23.5277	20.9254	24.0317	23.3182	22.5801	23.405	22.9699
XP_054985077.1;CON__Q3KUS7	23.2453	22.0963	23.1009	22.737	23.0309	23.189	23.4458	22.518	23.1234	24.1575	22.5522	22.3529	23.1856	21.891	22.8715	23.9428	23.1946	22.8981	23.019	23.8484	23.4257	23.0176	23.9451	24.075
XP_054985092.1;XP_054983581.1	28.0638	26.4593	27.5046	27.1539	26.3964	27.3423	27.1672	26.9649	27.5947	27.3814	27.4225	27.0464	27.0912	26.7882	27.5307	27.1865	27.0203	27.2642	27.5055	27.0689	26.8083	27.1836	26.4577	27.563
XP_054985164.1	21.4149	19.9006	23.0418	22.3949	19.866	19.6953	21.9819	21.5916	22.2083	21.9544	22.252	22.1066	18.723	21.2225	22.4612	22.1566	20.1134	21.4367	21.6136	20.8731	22.2028	22.4923	22.582	21.8367
XP_054995740.1;XP_054985184.1;XP_054977905.1;XP_054987924.1	25.6529	24.9475	26.0235	25.4555	24.9054	24.6405	26.0808	26.011	25.1613	24.0357	25.5723	25.4323	26.4925	25.3985	25.5737	24.8393	24.7173	25.4879	25.2894	24.6491	25.4214	25.0994	25.5811	25.2805
XP_054985241.1;XP_054985240.1	19.2105	19.6185	20.635	21.7066	21.6736	19.5307	20.5254	19.5401	19.6299	19.5704	18.7349	18.3073	19.1042	20.5717	18.9302	19.5712	22.1839	21.693	21.1134	19.5703	19.8591	21.9857	20.4874	21.6667
XP_054985326.1;XP_012790616.2	23.2552	23.3742	23.7306	23.1329	23.5058	23.1351	22.8323	22.9644	23.4908	23.3562	23.3166	22.8953	23.3439	22.5118	22.935	23.2736	22.1004	22.4939	22.7902	23.1926	22.2399	23.1082	22.7984	22.5494
XP_054985368.1	24.6402	24.457	25.1802	24.6718	24.8455	24.3235	24.443	24.621	24.809	24.2743	24.73	23.9089	24.7318	23.9597	24.3221	24.0082	23.3885	24.5444	23.9311	24.3663	23.6448	24.1957	24.9729	24.2655
XP_054985459.1;XP_054985449.1;XP_054985500.1;XP_054985384.1	21.6852	21.3134	21.8425	20.4359	19.6253	18.5512	22.6744	22.2462	22.5823	21.1853	23.3572	22.0248	22.5647	22.6543	21.8439	21.7732	20.9729	21.8737	22.3135	20.3553	21.9021	20.5148	22.3092	22.1694
XP_054985443.1	26.898	27.6453	25.7042	26.0531	26.8896	26.1168	26.1875	26.9478	26.215	26.2055	26.7405	26.9759	26.9795	27.7544	26.1798	26.3313	26.865	26.4992	25.4465	25.2578	25.7658	25.4561	26.6621	26.5119
XP_054985445.1;XP_055001532.1;XP_054984637.1	26.0018	24.9697	25.3014	25.5836	25.1203	25.7992	25.8469	25.3839	26.3376	25.7247	25.5579	25.6809	25.8572	25.6119	25.4851	25.132	24.177	25.404	25.4029	24.6105	23.092	24.9142	25.5086	24.2719
XP_054985451.1	19.7812	18.8312	19.5219	21.5166	21.6938	19.8582	18.3999	19.7006	19.6393	19.5324	19.7216	20.6356	19.7785	19.7359	18.8562	19.8213	21.5553	19.1551	21.6533	21.1502	20.9396	22.1169	20.238	22.1636
XP_054985508.1;XP_054985507.1;XP_054985506.1	23.1227	22.2793	21.1804	21.9503	20.449	21.7754	23.119	21.2826	22.561	18.4332	20.6761	19.9524	21.2511	19.5221	21.8891	21.1382	18.8453	21.4309	22.1746	18.647	21.5882	19.2508	19.5469	20.6953
XP_054985520.1;XP_054985567.1;XP_054985619.1	19.0946	20.7164	22.1437	20.2283	19.7612	22.0536	22.3331	21.667	19.6986	19.2899	21.9794	21.6158	20.0972	20.9704	20.7334	21.6181	18.3881	18.7928	19.2477	19.3669	20.2671	19.4717	21.4528	18.7398
XP_054985531.1;XP_054985532.1;XP_054985530.1;XP_054985529.1	24.456	23.7146	24.4072	24.3934	24.1522	23.9339	24.86	24.723	24.6205	23.412	24.7951	24.7662	25.3187	24.5647	24.2719	22.6779	23.3244	23.8517	23.1885	24.1313	24.4952	24.0184	24.3799	24.0398
XP_054988833.1;XP_054985745.1;XP_054985744.1;XP_055003362.1	25.385	25.0614	25.6041	24.6766	24.2826	25.0625	25.7799	26.4682	25.4679	24.3023	25.5043	25.7268	26.6458	25.3387	25.1718	24.6652	24.3744	25.2358	25.3921	24.5343	24.6337	23.7485	25.1377	24.296
XP_054985755.1;XP_004614001.1	23.6138	22.0066	24.362	19.4188	20.371	23.4875	23.2365	23.1559	22.9203	22.3862	24.0367	24.0931	23.6305	22.9857	22.6794	22.822	20.982	21.2701	24.2139	19.0231	23.4024	20.3308	22.7094	23.0233
XP_054985936.1;XP_054985933.1;XP_054985932.1;XP_054985937.1;XP_054985928.1;XP_054985939.1;XP_054985926.1;XP_054985927.1;XP_054985919.1;XP_054985920.1;XP_054985921.1;XP_054985915.1;XP_054985916.1;XP_054985917.1;XP_054985918.1;XP_054985935.1;XP_054985922.1;XP_054985923.1;XP_054985924.1;XP_054985934.1;XP_054985929.1;XP_054985930.1;XP_054985931.1;XP_054985925.1	22.7539	21.8088	22.245	22.3583	22.6799	18.4067	18.8043	22.498	19.026	23.5629	18.5845	19.7535	20.3917	22.0476	21.9187	21.7253	19.6174	19.3184	24.9899	19.6393	21.7624	22.2281	22.0513	21.7432
XP_054985990.1	24.9055	22.9505	24.3966	24.9903	23.7525	24.4886	24.3224	24.2514	24.6944	24.6741	24.6236	23.9787	23.8117	24.2555	23.7728	23.5672	23.892	23.3616	24.1626	24.9587	23.8912	23.3283	23.8075	24.6413
XP_054986043.1	24.2223	23.4593	23.6866	24.1765	23.5927	24.0613	24.48	24.6687	24.8876	23.0823	24.4094	23.6453	24.2895	24.6086	23.0484	22.9969	22.321	23.3542	22.3526	22.9195	22.7035	23.345	23.6146	23.0638
XP_054986047.1;XP_054986048.1;XP_054986046.1;XP_054986045.1;XP_054986044.1	19.2421	19.5969	18.7179	20.4659	19.9963	19.084	19.3084	19.1071	21.8636	21.0431	19.2359	19.6465	19.283	19.7211	20.5281	20.1779	18.9968	18.8112	19.5742	19.8892	19.8694	19.4024	20.1175	19.8329
XP_054986081.1;XP_054986080.1	24.0665	23.7228	23.2397	22.9094	23.8831	23.0996	23.3427	23.612	23.3135	22.6762	23.9038	23.412	23.832	22.2402	24.3481	24.1789	23.5847	24.2681	23.8745	23.008	23.9739	22.6224	23.8883	23.132
XP_054986113.1	24.1614	23.3996	23.2659	22.2644	22.3262	22.178	22.8998	22.4183	22.7831	21.9603	21.5336	21.9759	20.1252	21.8627	20.9693	22.9988	20.6026	22.1888	21.7215	21.5856	22.998	21.8427	23.0452	22.1475
XP_054986280.1;XP_054986271.1;XP_054986264.1;XP_054986256.1;XP_054986249.1	21.8135	20.2822	21.2997	21.5925	21.6319	21.8014	22.0795	21.766	21.6409	21.78	19.1661	21.2559	21.4934	21.204	20.9871	19.4143	18.5821	21.2803	18.9104	19.78	21.7582	21.6454	21.2819	21.8544
XP_054986368.1	22.2209	21.0956	21.6356	22.1549	22.1093	22.1023	22.154	22.2714	22.7007	21.6686	22.423	21.8743	22.0927	21.6645	22.0875	21.7774	22.3766	22.4567	22.3611	21.8863	22.2389	21.7122	21.9045	22.0998
XP_054986405.1;XP_012787293.1;XP_004611137.1	22.7562	23.5744	21.7048	22.1503	21.5477	22.786	24.1363	22.5412	23.1339	22.8209	23.1601	23.3699	23.4437	23.7335	23.2443	22.6588	22.2229	22.721	22.6313	22.8911	22.046	22.51	23.1133	22.0228
XP_054986440.1	27.9248	26.8113	27.661	27.2901	26.6649	26.8357	27.0161	26.791	27.1197	27.1059	27.4176	27.4092	27.4471	27.2096	28.2895	28.1763	26.9598	26.9927	27.8824	27.5761	27.738	27.5624	27.5802	28.3644
XP_054986452.1;XP_054990426.1;XP_004603876.2	28.9304	28.3286	29.0326	29.2168	28.7992	28.0856	28.803	28.5517	28.1577	27.6374	28.7752	28.8868	28.8936	28.2975	29.0047	28.3337	29.0315	28.3341	28.7553	28.7014	29.6058	28.8443	28.8967	29.1726
XP_054986524.1;XP_054986523.1;XP_054986522.1;XP_054986521.1;XP_054986520.1;XP_054986519.1;XP_054986517.1;XP_054986516.1;XP_054986515.1;XP_054986514.1;XP_054986513.1	19.028	21.1798	23.4986	23.9829	23.5722	23.7441	19.1967	24.5028	22.5984	19.6468	22.6159	22.8679	23.5081	19.5924	19.781	23.5112	19.5536	18.9368	20.0032	23.2254	22.6648	23.1988	24.7935	23.3644
XP_054986562.1;XP_054986561.1;XP_054986560.1;XP_054986559.1;XP_054986558.1;XP_054986557.1	24.8357	24.6549	25.8825	25.3017	24.9866	23.8279	23.9777	24.8619	24.412	24.2356	24.2833	24.5574	24.8613	24.0443	24.7821	24.9509	24.0401	24.2862	24.129	24.6043	24.6114	25.1191	24.97	25.3844
XP_054986580.1;XP_054986578.1;XP_054986579.1	21.9854	19.5904	20.773	20.9685	20.9231	20.5474	21.5896	18.668	20.6605	18.5214	22.4107	20.6271	21.2237	20.0828	19.8389	19.2473	19.7831	20.691	21.4405	20.6997	20.2497	20.2991	18.0836	20.4846
XP_054986650.1	20.3718	19.8949	20.1406	21.7352	21.458	18.9844	18.7127	20.709	19.9396	18.9064	20.2864	21.6794	20.3939	20.8826	19.4842	20.7436	23.1219	19.9981	21.1606	19.4691	21.2973	21.4971	20.9358	22.2456
XP_054986759.1;XP_054986757.1;XP_054986756.1;XP_054986755.1;XP_054986754.1;XP_054986753.1;XP_054986752.1;XP_054986751.1;XP_054986750.1;XP_054986749.1;XP_054998108.1;XP_054986760.1;XP_012789887.2	24.9366	24.3013	25.1558	24.1662	24.0504	24.7425	24.4182	24.7582	24.5999	24.952	24.3377	24.4187	24.4711	24.8231	24.6261	24.0601	23.4806	23.9777	23.951	23.2082	24.2641	23.8333	24.3217	24.5091
XP_054986784.1	26.2956	26.2175	26.1202	25.2506	25.4948	26.0383	26.3534	26.003	26.2425	26.0717	26.7808	26.3474	26.1659	26.084	26.539	26.5153	25.7556	26.4705	26.5609	25.9608	25.9287	25.9323	26.4908	26.2151
XP_054986791.1;XP_054992378.1;XP_054992377.1	23.4478	20.7664	23.1432	22.2183	22.0113	22.1187	23.7422	22.5974	22.8646	21.771	22.4549	22.3869	22.8384	21.8073	22.1357	21.1936	20.6274	21.2097	21.3773	21.1903	21.6741	21.5483	21.6846	21.0643
XP_054986794.1	21.8034	20.8284	22.9054	22.5093	22.4417	21.1311	18.971	22.4925	22.4991	22.1659	21.9893	22.592	22.0366	18.6924	22.125	21.7808	22.2025	19.2133	18.2239	21.813	22.1672	22.2622	23.0497	22.829
XP_054987010.1	25.5463	24.7078	25.9829	25.8464	25.5785	24.4225	24.6449	25.0881	25.2763	24.6169	25.3111	25.1047	25.3652	24.553	25.5613	25.529	25.2327	25.3705	25.0889	25.5656	25.5098	25.8386	25.8864	26.0687
XP_054987022.1;XP_054987021.1;XP_054987020.1	19.3607	17.8975	21.2197	19.3993	20.989	19.524	19.6252	18.7969	21.6034	18.3063	20.2946	19.4859	20.1986	19.7774	20.1022	20.9255	19.0242	18.7831	20.014	20.3253	17.5515	19.9169	21.0851	21.916
XP_054987106.1;XP_054987107.1;XP_054987105.1	23.8356	23.6334	24.3882	24.0025	23.7085	23.2462	23.859	24.1089	23.9802	23.807	24.4638	23.8805	24.1969	23.7215	24.5353	24.1319	24.0017	23.8383	23.668	24.285	24.3923	24.546	24.4941	24.1134
XP_054987166.1;XP_054987164.1;XP_054987163.1;XP_004619065.1	27.6625	26.7836	28.3292	27.1211	28.456	25.9593	27.8123	26.6962	27.7363	26.0866	27.445	27.8182	27.8932	27.0645	27.926	27.4042	28.2008	26.7648	26.9589	27.8192	28.7825	28.4678	28.329	27.7574
XP_054987194.1;XP_054987196.1;REV__XP_055003246.1;REV__XP_012787459.2;REV__XP_055003234.1;REV__XP_055003232.1;REV__XP_055003233.1;REV__XP_012787457.2;REV__XP_004601367.1;REV__XP_054975959.1;REV__XP_004601368.1;REV__XP_012787458.2;REV__XP_055003237.1;REV__XP_055003236.1;REV__XP_055003245.1;REV__XP_012787461.2;REV__XP_012787462.2;REV__XP_055003241.1;REV__XP_055003242.1;REV__XP_012787466.1;REV__XP_0…	26.3712	26.093	26.8942	26.8559	26.4985	26.2667	26.4068	26.9807	26.7095	26.5604	27.1644	26.8259	26.9192	26.806	26.8394	26.7537	27.1983	26.6101	27.2102	26.8066	26.4761	26.8427	26.8038	26.5348
XP_054987241.1	25.207	24.1742	24.7541	24.1017	23.7141	23.6838	23.5506	23.1451	23.8792	24.1911	23.6532	23.4344	23.8348	23.3174	24.0838	23.5015	22.3721	22.5682	23.1345	23.2696	23.8275	22.6694	22.1693	23.68
XP_054987308.1;XP_054987307.1	22.3323	19.3408	21.8162	20.9503	22.5395	23.5633	23.5768	23.4957	23.273	23.5996	24.8641	24.0533	24.9353	24.1529	23.0276	22.7252	23.264	24.0798	24.1067	22.9769	22.8902	23.5982	24.0687	23.4903
XP_055002946.1;XP_054987374.1	23.8243	19.5153	23.0587	23.1435	21.8109	23.8385	25.4825	23.4166	24.2931	24.5421	24.5369	24.6151	23.0409	22.9412	24.8817	25.468	24.234	24.106	25.7112	24.7628	25.1021	21.9936	23.9615	25.1043
XP_054987387.1	21.4723	19.9892	21.0528	20.7374	20.6829	21.3027	21.8096	22.053	21.5414	20.3383	21.0646	21.43	21.0016	20.7195	21.6075	20.4393	20.9519	18.3077	20.8598	19.5494	20.9444	21.2249	20.7407	21.2264
XP_054987424.1;XP_054987423.1;XP_054987422.1	19.5657	18.7503	19.711	21.9051	21.5957	19.1514	18.1256	18.8685	19.1792	18.2705	21.031	19.866	19.3039	19.6592	20.1964	20.4897	23.289	19.2288	21.6888	18.8421	19.7127	21.8705	20.9143	20.8524
XP_054987426.1	24.397	22.8942	25.2195	22.7984	23.4235	23.5932	24.4674	23.9233	24.7822	18.3858	24.1205	24.0124	23.875	23.6194	23.5063	22.1674	22.935	23.712	23.6735	22.1427	23.1071	23.4654	23.4228	23.1146
XP_054987459.1	21.9775	22.0594	23.321	22.477	23.4654	22.4938	22.8878	23.5828	23.4098	23.4354	22.9771	23.0685	22.6442	23.6426	22.7851	23.0696	22.4602	23.1106	22.6283	23.0888	22.7516	22.9751	22.9993	23.2381
XP_054987461.1	24.0462	23.0212	21.6906	23.204	21.9831	23.6991	23.5399	23.9746	24.394	23.6888	23.9653	23.5087	23.3126	23.1635	22.96	21.9728	22.229	22.5657	22.276	22.6192	21.9787	22.7035	22.6706	22.3678
XP_054987486.1;XP_054987485.1;XP_054987487.1	23.1707	22.3019	23.5578	23.6422	22.7799	22.2161	23.6761	23.2425	23.1719	22.1528	22.7592	23.0323	23.2886	22.4978	22.6439	22.7055	22.5209	22.3733	22.8741	22.9895	24.0283	23.1978	23.0958	23.3487
XP_054987503.1	23.4893	21.7056	23.6533	22.6836	22.5531	21.0053	21.5877	21.2589	22.1422	21.3462	22.0887	22.3841	22.455	23.2531	22.0461	21.9035	22.5229	21.4947	22.2361	22.1586	23.2453	23.9827	22.3817	23.0318
XP_054995659.1;XP_054995658.1;XP_054991964.1;XP_054987570.1	21.529	19.1537	21.1474	20.733	20.739	19.5149	21.5635	21.48	20.5511	19.6758	19.9806	19.7138	20.9051	19.3899	18.7228	19.4564	19.2405	20.3267	20.2671	19.2673	20.7523	19.7133	21.0124	19.8082
XP_054987616.1	20.8078	19.1621	20.9903	20.7212	20.4244	18.4933	18.8272	21.5821	21.1933	19.5611	20.8817	20.9412	21.7077	20.0956	20.0657	21.0206	24.2721	20.2687	21.0263	20.0245	21.0032	20.8402	21.4654	22.2601
XP_054987643.1;XP_054987642.1	20.27	21.5173	22.1804	22.3299	22.6367	20.4966	21.5741	22.8875	21.6909	18.7272	20.8287	23.2873	22.6638	21.2085	21.0133	20.2031	20.692	21.0011	20.9516	20.136	19.1518	21.1724	22.6877	21.9411
XP_054987677.1;XP_054987676.1	22.5414	21.9418	22.9339	19.0044	19.137	23.4229	24.836	25.1461	21.8292	22.3563	24.4589	24.2767	23.6229	19.9786	22.2577	21.0099	18.8281	23.8381	21.7445	22.3176	21.6013	20.1294	21.2379	19.9536
XP_054987781.1	27.3576	27.0373	27.1338	27.1394	26.8811	27.6901	27.2092	26.7778	26.9192	27.554	25.9871	26.4905	26.1634	26.1903	26.1842	26.6209	25.2779	26.0226	25.8187	26.9136	27.5182	26.206	27.219	26.5044
XP_054987850.1;XP_054987849.1	19.7889	19.6576	19.9936	19.4659	20.1407	20.5842	20.2709	20.1288	20.5103	19.8735	20.3225	18.608	19.4982	19.8964	19.0177	20.0571	19.2609	19.4943	19.7844	19.5629	19.4739	18.024	19.4429	19.7387
XP_054987870.1	21.5959	18.152	22.5727	21.544	19.9796	18.2981	19.7196	20.4792	21.4047	21.3322	20.8556	20.9099	21.0431	20.5478	20.7985	19.6051	19.1627	19.6802	19.1934	18.8475	20.106	18.663	19.844	21.1185
XP_054987871.1;XP_054987872.1	18.7924	19.9857	20.8933	20.811	21.2318	19.6599	20.0432	21.1427	20.4817	18.9688	19.8671	21.6775	19.6721	20.6075	21.2031	18.9025	21.856	18.427	19.3493	18.022	22.0642	21.8287	20.6444	22.0088
XP_054987885.1	19.5499	23.8109	22.5793	24.8082	19.3759	23.4585	23.4822	19.2601	25.16	23.098	23.1592	23.4349	24.0589	21.6364	24.0262	20.1442	19.1592	19.4038	20.9578	23.3996	27.0316	19.7815	23.8781	26.3295
XP_054987912.1	24.5592	23.8761	24.4596	24.0335	23.9289	24.1273	24.4374	24.4904	23.6923	23.4269	24.8622	24.6301	25.1345	24.1052	24.6366	24.5851	24.7507	24.5612	24.4643	24.7508	24.7089	24.6264	24.5009	24.9659
XP_054987922.1	21.6878	22.5249	22.1917	19.9415	19.0919	21.2937	21.9557	22.1366	20.904	20.5651	22.0133	21.795	19.2381	21.6287	21.7957	21.7051	21.5099	22.4503	21.5267	22.2605	22.0182	22.2631	22.1399	23.2727
XP_054988011.1;XP_054988010.1	18.057	18.5362	19.2296	19.7803	21.3392	21.4072	22.4906	21.9284	22.0151	21.5037	21.513	22.5765	23.0856	21.8363	21.9833	21.7269	21.5173	21.4111	21.767	21.0853	21.4806	21.7096	21.5574	20.511
XP_054988058.1	22.0869	22.6299	23.8028	23.745	23.1325	21.8392	22.9577	23.1563	23.2914	22.0886	23.003	22.5152	22.8508	22.4034	22.9832	22.8042	23.6438	22.6357	23.0978	21.9094	22.6636	23.251	23.6415	22.5955
XP_054988152.1	28.8924	28.3806	29.0335	28.4265	28.5494	27.6481	28.0357	28.353	28.2086	27.663	28.3119	28.1713	28.55	27.8428	28.2631	28.0837	27.2645	28.0396	27.3731	27.6808	27.8159	27.8889	28.3867	28.7181
XP_054988182.1	25.2576	24.9051	25.2195	25.6123	25.5919	24.5896	24.7777	25.3489	25.6165	24.4518	25.6526	26.241	25.559	25.3477	23.9975	24.1691	24.5127	24.6511	25.1598	25.485	24.2376	24.9181	25.2935	24.2471
XP_054988228.1;XP_055003292.1	21.8395	22.7622	23.0501	22.1104	19.5467	20.741	18.5154	20.536	19.4618	18.9263	18.3723	19.8889	18.6714	19.9092	18.6476	20.927	18.6354	19.0427	19.2568	20.6994	23.3058	19.2908	20.2882	18.7038
XP_054988254.1	22.264	20.4061	19.9777	21.5388	19.6255	21.3934	19.8111	21.4643	21.1557	21.4983	21.9147	22.6658	22.1286	21.6559	22.3007	21.2598	21.816	21.9282	21.9399	21.675	22.2221	21.1319	23.5658	21.7549
XP_054988289.1;XP_054988290.1;XP_004621114.1	23.5575	23.0494	24.2072	23.6845	23.1949	23.3395	23.9894	23.9678	23.9074	24.3532	23.4042	23.9457	23.7338	22.6546	23.5531	23.8149	23.6823	23.1438	23.9321	23.5343	24.2358	22.81	23.9886	24.1096
XP_054988345.1	19.5625	19.4601	19.2248	19.0298	19.6715	19.6445	21.3932	19.2971	19.6994	19.4531	20.0885	19.7633	19.7397	18.986	18.3585	19.2392	18.0664	19.3971	20.1047	19.1023	19.6568	20.243	20.6748	19.5036
XP_054988392.1	21.9944	20.5127	18.6587	18.5712	19.9966	18.3736	19.5477	21.5818	20.5926	19.5509	20.5327	21.3239	21.0786	19.9382	22.993	22.6911	18.4058	19.5618	21.3263	18.1524	20.1755	20.2646	21.282	21.1995
XP_054988421.1	19.747	18.1985	21.593	21.9755	20.001	19.0083	20.5468	21.2549	20.9565	20.5663	20.508	20.2687	19.6781	18.991	20.3361	18.4704	20.698	18.799	19.3402	20.6723	20.5327	21.2751	21.1174	19.3358
XP_054988502.1	19.3393	18.1437	20.997	22.5199	20.6531	19.186	20.5849	19.0789	19.3292	19.7592	18.5845	21.0218	20.7267	18.7288	19.2433	20.1688	19.6247	18.8913	20.7507	20.4964	18.8922	20.6052	21.8478	19.8296
XP_054988523.1;XP_054988524.1	24.589	23.9062	22.5185	23.5496	23.1478	24.058	23.929	23.0333	24.1556	23.5556	24.0074	22.895	23.9741	24.1014	23.0433	23.3475	19.0403	23.2522	23.3949	22.1381	19.5138	23.7404	24.2801	21.503
XP_054988563.1	19.1975	18.8735	22.8374	19.9862	20.0296	20.1716	22.9177	22.4382	23.1211	22.7665	22.2846	22.5875	23.7763	22.5183	23.3465	21.6862	21.6865	21.6746	18.3822	20.1589	20.2549	19.4518	19.1264	19.637
XP_054988619.1	23.8176	23.5812	21.6766	22.0721	22.0237	23.5869	23.3586	22.9906	23.1064	22.0942	22.6068	23.777	23.5442	23.8705	22.7853	23.191	22.5093	22.9243	22.5055	21.8946	23.6174	22.7812	21.8891	22.2059
XP_054988643.1;XP_054988642.1	20.3527	20.8399	21.1976	20.8504	18.6867	20.7854	22.4111	20.3075	20.3291	19.1757	21.9629	18.7562	21.3643	21.0278	21.7745	18.4761	19.7461	19.2243	20.4546	19.0079	23.3605	20.572	19.817	19.5164
XP_054988648.1;XP_054991368.1	21.4714	21.7901	23.1568	23.4044	23.4466	22.0385	22.0659	22.7342	23.0546	18.8458	22.6345	22.792	22.1339	22.3314	22.1244	21.5813	22.305	21.9399	22.184	21.5444	23.2059	23.2138	23.6994	23.8667
XP_054988659.1	25.0988	24.8784	24.6018	24.0462	25.6387	25.8474	25.146	25.3386	24.2089	25.5555	24.5627	24.2592	24.9083	24.9276	24.3213	24.2121	23.8189	23.6787	23.9661	22.9125	24.2569	23.9112	25.3496	24.3478
XP_054988745.1;XP_054988746.1	23.0232	22.9392	23.6422	22.8332	23.2887	23.0534	23.6337	23.2505	23.3835	23.0696	24.2308	22.9064	22.8296	23.0177	23.8289	22.6866	22.407	23.1172	22.6199	22.5753	22.8891	21.8744	24.3452	23.2967
XP_054988760.1	21.8494	18.8449	22.5201	19.7856	21.6331	23.3066	21.5386	18.1043	22.3125	18.5997	23.0455	22.5637	19.1904	22.4091	22.6144	23.2054	19.6286	22.5062	19.1898	21.569	22.7609	22.345	23.0219	22.6479
XP_054988790.1;XP_054988789.1;XP_054988794.1;XP_054988793.1;XP_054988792.1	25.4685	24.4072	25.4283	25.2353	24.906	24.1739	24.7963	25.3365	24.7658	24.3062	24.458	24.78	25.6604	24.2464	25.1605	24.4184	24.1462	24.2437	24.0633	24.9226	25.4027	25.2013	25.7686	25.0249
XP_054988840.1	20.4213	21.3552	22.0901	24.412	20.043	20.9348	18.7002	22.5471	20.6813	20.655	20.5432	22.3395	21.7247	19.6562	20.6215	20.6104	22.6008	20.4162	20.9015	20.6244	23.235	22.3469	21.7786	23.2182
XP_054988913.1;XP_054986244.1;XP_054986239.1	23.8349	22.7948	22.5952	22.3264	22.9389	24.1348	23.4765	22.265	21.6483	23.4604	22.0068	22.107	18.633	22.2209	20.8228	21.8709	20.2697	19.7576	21.9526	22.1024	21.6915	20.3703	22.301	20.9251
XP_054988921.1;XP_012790365.2	24.2985	23.0858	25.2909	26.4413	25.7224	23.4082	23.8377	23.9399	23.8125	24.3556	25.1147	25.3972	24.7292	24.7324	25.088	25.158	26.7888	25.6033	25.9187	25.9254	25.7723	26.6843	25.5399	26.5265
XP_054988958.1;XP_054988959.1;XP_054988960.1	21.1143	19.4834	21.1197	19.3944	20.3105	21.9482	22.3642	18.3458	22.1615	19.7901	19.5693	20.537	19.7802	18.6898	20.2295	20.1964	18.2045	18.1745	19.898	19.2092	19.4795	21.0204	22.0178	19.7595
XP_054989005.1;XP_054989004.1	25.9662	26.0457	26.7876	26.068	25.7645	26.1897	26.4108	26.4705	26.542	26.2085	26.262	26.5557	26.8329	26.3553	26.2493	26.1675	26.6573	26.403	26.1683	25.9641	25.9429	26.3164	26.8516	26.8715
XP_054989019.1	26.1801	25.5562	25.3003	25.2532	25.8141	26.3909	25.6961	26.1954	25.5707	25.8796	25.8463	24.9173	25.2267	25.3223	25.249	25.216	24.8272	24.9514	24.7012	25.7095	25.0403	25.1105	26.2847	25.5967
XP_054989027.1;XP_054989025.1;XP_054989026.1;XP_054975411.1;XP_054975410.1;XP_004607447.1	22.5787	19.9852	22.3802	24.8285	23.2757	19.7492	20.7984	21.4953	20.7456	20.7569	22.5094	23.5022	23.0478	22.0981	21.5595	23.0283	24.8192	22.1742	24.1112	21.9169	23.4663	24.0632	22.4306	24.2813
XP_054989035.1;XP_054999354.1	26.328	25.45	26.3642	26.2754	25.7989	26.3409	26.6392	26.3471	26.4465	25.8781	26.3098	26.3679	26.5302	26.0416	26.1489	25.603	25.1822	26.0364	25.7014	25.5485	26.0672	25.6309	25.5816	25.8543
XP_054989036.1	18.0704	20.0407	21.9425	21.2875	21.2056	21.1125	21.0588	21.887	21.793	21.5585	20.8468	20.9773	21.5569	20.938	22.038	20.4221	19.3526	18.8096	18.3939	20.9924	21.211	19.0353	19.8685	21.2078
XP_054997174.1;XP_054989037.1	25.1598	25.1414	25.7591	24.353	25.125	25.6131	25.5288	25.1648	25.3264	25.6939	25.4187	24.6158	24.6964	25.1493	24.4007	24.2482	24.4723	24.6338	24.8275	24.4666	24.3311	22.8497	24.0794	24.0803
XP_054989072.1	21.1707	19.0094	20.9275	21.1369	19.9201	21.0106	21.2238	21.2132	22.105	21.8967	20.9574	18.8009	21.0805	19.5458	19.0167	20.9068	19.0397	19.4343	20.8451	17.9859	18.8082	20.5491	21.2119	20.8906
XP_054989076.1;XP_054989077.1	25.8008	25.3511	26.7074	26.8044	26.1199	25.7181	26.3683	26.4184	26.549	25.5614	26.243	26.5929	27.0302	26.1571	26.0157	25.8722	25.936	26.1976	26.2552	25.8742	26.2679	26.1964	26.4013	26.5145
XP_054989104.1;XP_054989103.1	23.9249	24.1178	18.8601	23.8594	23.7103	23.8208	23.865	24.1375	24.1618	23.642	23.5268	19.2595	23.4434	23.5162	20.1688	23.061	19.2359	23.521	23.7123	19.8726	23.9735	23.5323	19.992	19.3566
XP_054989156.1;XP_054986237.1	21.0429	19.6942	22.2425	21.0546	22.2057	19.2043	18.3561	21.151	21.433	20.157	19.9031	19.5948	19.1618	20.5405	19.7385	20.6587	18.7509	18.4582	19.4041	20.3601	21.2708	20.1782	22.0641	20.5333
XP_054989180.1	26.9987	25.648	27.0525	25.4054	25.5995	26.6873	27.0257	27.4659	26.0896	25.7071	26.007	25.66	25.3359	25.2912	26.6462	25.946	25.6718	25.1644	25.4205	26.0638	26.3471	25.2365	26.8429	25.6531
XP_054989195.1;XP_054983527.1	26.8797	26.6895	27.1123	26.5655	26.2216	26.9858	27.4154	27.5201	27.1119	26.1303	27.23	26.8618	27.5651	27.0905	26.8193	26.2631	26.1594	26.5796	26.6413	26.5578	26.2802	26.2617	26.383	26.5374
XP_054989254.1	19.1569	18.0987	21.1283	20.75	18.6268	20.5243	20.7518	22.0414	21.5296	20.7024	21.1507	20.8024	21.3198	21.1647	21.1015	20.1873	18.7014	20.0499	20.3497	19.8533	19.662	19.9438	21.6006	18.7586
XP_054989255.1	22.3352	21.4922	23.197	23.2548	22.0565	22.3023	22.4538	22.357	21.1304	19.1854	21.7788	22.1822	21.8456	21.1159	21.9382	22.3324	22.4756	20.816	22.4767	22.1169	22.7725	22.2924	22.3554	23.2383
XP_054989286.1;XP_054989288.1;XP_055000206.1	23.3671	20.1561	23.2398	23.6628	20.3229	22.3201	23.4422	23.3502	22.9351	21.7924	23.1197	21.1353	21.7947	21.2463	22.4181	21.8161	22.2079	20.4787	22.6906	18.6896	22.7164	20.3615	19.8442	24.0195
XP_054989287.1	25.4227	24.883	25.9802	26.313	25.6086	25.1091	25.3775	25.6338	25.5497	25.172	25.8378	26.1762	26.0471	26.2343	25.9899	25.4461	26.2596	25.7571	26.3712	25.4445	26.2364	26.0238	26.3971	26.3238
XP_054989294.1	21.4556	22.038	22.0181	23.2231	22.3233	21.8946	21.8278	22.4286	21.9068	21.3596	22.2518	22.4042	22.3615	21.9795	22.4476	22.8062	22.5595	21.6652	22.8018	22.0784	22.5366	22.8913	22.9571	23.0551
XP_054989357.1;XP_054989356.1	21.6976	19.7967	19.7837	19.9489	20.2446	18.8088	19.489	23.3893	19.0568	18.5739	21.905	22.4734	23.0364	21.4334	21.7464	20.4911	25.2036	22.3361	21.4241	19.0259	22.7658	21.2185	22.4559	22.0961
XP_054989534.1	19.659	20.3135	21.6916	20.5699	19.9829	19.5217	21.0311	20.8873	21.3348	20.7568	22.0977	20.4151	20.3759	20.5045	20.6879	18.9958	20.9636	20.3696	20.0767	18.8242	19.2918	19.931	21.2056	20.771
XP_054989574.1	24.8022	24.7061	25.2043	25.1704	25.0914	24.6955	25.2011	25.0891	25.235	23.9832	25.4457	25.4936	25.859	25.1225	25.1201	25.0385	24.7487	24.8745	25.78	24.5657	25.3299	25.5429	24.9283	25.6919
XP_054989585.1	18.4925	18.1158	20.6371	21.7049	21.9802	20.6923	20.3608	20.0042	19.6905	18.8653	19.7679	22.5064	19.416	18.9221	20.391	21.1125	23.2377	20.5797	22.5395	19.4427	21.785	21.8846	20.8545	21.8295
XP_054989609.1	28.6498	27.8998	28.8342	27.4126	27.798	28.6467	29.8828	29.3961	29.1788	28.8731	29.9158	29.0654	28.4591	28.2304	28.9955	28.2546	28.483	28.0592	29.3702	27.3514	28.4289	27.8639	29.2353	28.8484
XP_054989635.1;XP_054989634.1	23.5068	22.5504	24.6539	24.2119	22.919	22.2174	23.0502	23.3237	23.938	22.9761	23.5748	23.9045	23.6961	23.3397	24.3061	23.9472	23.8926	25.0187	23.5962	24.3958	24.1235	23.7492	24.4604	23.4859
XP_054989641.1;XP_054989640.1;XP_054989642.1	18.3314	19.5657	20.8984	20.8573	21.075	20.7302	22.358	21.1826	21.0592	20.815	20.9143	21.2684	21.542	20.6827	20.9532	18.8577	21.0237	19.5396	21.4089	21.0799	21.315	20.3771	21.557	21.4847
XP_054989698.1;XP_054989697.1;XP_054989695.1;XP_054989694.1;XP_054989693.1	25.7363	24.5842	25.5862	25.4335	24.6529	26.106	24.1843	25.0771	23.9865	24.2863	25.0615	24.4085	25.3481	24.6236	25.1905	24.9049	24.9604	24.9199	24.8544	25.2261	25.4719	24.4972	25.0627	25.799
XP_054989740.1	20.8807	21.0081	21.057	21.0927	21.5344	21.6296	21.4986	21.5039	22.1029	21.3547	22.1129	20.809	21.3796	21.3916	21.685	21.4666	21.7416	20.246	21.5031	20.6378	20.1793	21.6602	20.0797	19.4622
XP_054989777.1;XP_054989775.1;XP_004615716.1	24.3523	23.8073	24.1885	24.1448	24.6975	24.5664	24.5862	24.6931	24.438	25.1041	25.1084	24.9296	24.5466	24.5289	23.9636	24.4091	25.2275	24.4001	25.4308	24.6162	24.2302	24.6982	24.7837	24.2494
XP_054989850.1;XP_012787553.2	23.9756	24.4681	25.0882	24.916	24.8002	24.1178	24.7624	25.186	24.7307	24.34	25.3495	24.9382	24.7752	25.5624	25.2652	24.2924	25.1314	24.2271	24.7745	23.3652	24.3756	24.7916	25.4328	24.2933
XP_054989881.1	21.206	19.9812	21.9666	19.4614	21.3403	20.5919	20.524	21.6062	20.0382	20.7094	21.9131	22.9634	21.8663	21.6297	21.8039	21.0473	21.4458	21.1716	21.2178	19.7929	19.8127	19.9426	20.234	21.1962
XP_054989895.1	21.6842	20.5274	21.4276	20.2878	20.403	21.4847	21.6946	21.7263	22.3783	21.4253	21.869	21.1049	20.9122	21.8415	20.6574	20.4759	19.8092	20.8092	20.154	19.3045	19.0543	21.2202	20.1211	19.6966
XP_054989901.1	20.1761	19.8046	19.5434	21.5994	23.4475	20.9303	20.6901	20.3534	19.2257	19.2721	19.1359	20.386	19.797	19.3831	19.6492	20.3398	23.6129	18.7003	19.8107	21.4742	21.746	20.3877	20.5492	21.3828
XP_054990148.1;XP_054997419.1	22.6608	22.8731	22.7338	22.7614	20.6779	22.4919	21.9268	23.128	22.0077	21.5198	22.9503	22.6856	23.257	21.9651	22.6887	23.1195	23.3919	22.286	23.2503	23.624	23.1865	22.0963	22.8958	23.3673
XP_054990151.1;XP_054990150.1;CON__Q3T052	23.9686	22.5546	24.1882	23.4078	23.4481	23.798	23.7723	23.6643	23.3419	23.8728	23.0297	22.9142	23.3376	21.3421	23.3472	23.8867	22.0334	22.4806	22.7479	23.6897	24.3506	23.151	23.6693	23.8959
XP_054990153.1;CON__Q0V8M9	24.1779	23.0269	23.8354	23.3512	23.2935	22.4375	22.4164	22.9254	23.2901	22.3644	20.8118	21.9229	20.5509	17.6915	22.3268	23.7329	22.2268	22.8913	22.1096	23.4196	23.0163	23.3307	24.2961	23.8889
XP_054990279.1;XP_054990272.1;XP_054990261.1;XP_054990253.1	19.338	18.458	21.9338	21.3693	21.64	21.4822	21.3241	21.5674	21.6284	20.8823	21.657	22.1087	21.8734	22.1391	21.4144	20.1265	23.1898	22.2188	23.3986	22.2449	22.6437	23.2823	21.3814	22.4259
XP_054990296.1;XP_054990295.1;XP_054990294.1;XP_054990292.1;XP_054990291.1;XP_054990290.1;XP_054990289.1;XP_054990288.1;XP_054990286.1	22.9866	22.3739	23.7321	23.4377	23.3388	22.176	24.6707	23.5418	24.4616	23.9621	23.7273	23.6193	23.6794	23.7088	23.3656	21.766	21.9302	21.0584	21.6565	19.961	21.6132	20.8861	23.8434	21.636
XP_054990300.1;XP_004602169.1	21.2286	18.5652	21.7486	21.2949	20.8718	21.2081	21.318	22.0019	20.2796	20.2147	20.4978	19.8342	19.6323	20.2653	19.4422	21.7735	21.9968	19.5282	19.2667	19.2731	22.8727	21.3039	20.9357	22.8941
XP_054990338.1	23.0714	18.1987	23.4935	21.6351	22.447	22.3141	22.2166	22.4278	22.8733	22.7635	23.0929	21.7628	21.974	21.485	22.9708	23.0871	21.1487	21.8181	22.4901	22.6606	21.1205	22.1691	21.9829	21.6864
XP_054990339.1;XP_054990914.1	24.1443	23.8939	23.5328	23.2966	23.6293	23.507	23.1683	24.093	23.1025	22.1969	25.2637	24.3088	23.8856	24.7506	22.8433	22.8428	25.9489	24.2277	25.5869	23.9566	23.8229	24.7318	23.4335	23.6902
XP_054990346.1	22.3597	22.33	22.5493	22.7292	22.8093	23.359	23.3619	23.2956	22.8664	22.4513	23.4539	24.45	23.8214	23.5254	22.6434	23.2523	23.0952	23.2213	23.6196	23.1907	23.2938	23.1634	23.8805	23.5568
XP_054990363.1	23.8812	21.0257	24.3264	24.7301	22.7116	21.7237	20.989	22.0462	20.3264	20.3241	22.9319	23.2977	23.1846	20.9137	22.6193	23.1052	22.9941	21.2879	24.4349	23.4057	23.865	23.6545	24.0095	23.5064
XP_054990485.1;XP_054990478.1;XP_054990472.1	20.3232	21.8593	21.2669	21.6136	21.9609	19.5229	21.094	20.9514	21.0137	19.9097	20.6047	21.135	21.1018	19.5025	18.5849	21.548	21.8751	21.5786	22.2217	20.653	22.0091	21.6882	21.681	20.2288
XP_054990647.1;XP_054990646.1;XP_054990645.1	23.494	22.8503	24.2678	23.6528	24.4813	23.4081	22.963	23.0945	22.471	20.7819	23.2628	23.4842	24.1417	23.1427	23.3449	23.2076	22.6845	23.2627	23.6192	23.9199	24.1186	23.3523	22.6002	23.4376
XP_054990815.1	21.8556	21.9427	22.0471	22.3557	21.4954	21.5087	21.8441	22.2993	22.0168	21.8747	22.3233	21.982	22.086	21.9724	22.2579	21.6482	21.5812	21.5013	21.7512	21.6114	21.7679	22.2642	21.8778	21.9837
XP_054990853.1;XP_054990844.1;XP_054990839.1;XP_054990829.1;XP_054990823.1;XP_054990816.1	20.1892	22.5831	21.1269	21.0142	22.9599	22.3341	22.2391	21.9322	21.7532	21.6789	23.0527	21.9228	22.7331	19.819	22.5888	19.0383	22.2382	19.2549	22.0129	23.5134	22.5001	22.865	21.9219	21.4466
XP_054990906.1;XP_054990903.1;XP_054990901.1;XP_054990898.1;XP_054990897.1;XP_054990896.1;XP_054990907.1;XP_054990905.1;XP_054990904.1;XP_054990902.1;XP_054990899.1	23.3766	22.873	23.4576	23.3913	22.7693	23.0713	23.4037	23.5372	23.4803	23.2347	23.5567	23.2792	23.5053	22.8797	23.5889	22.6127	22.3893	22.8499	22.6629	22.574	22.7417	23.0236	23.3305	23.0601
XP_054991022.1	26.7908	25.449	25.7204	25.2476	25.815	26.4903	25.7877	25.9358	25.9995	24.8181	25.2454	25.0883	24.3748	25.101	26.5996	25.4182	24.3594	25.2589	24.3337	25.1111	26.9338	23.5068	25.9406	24.7354
XP_054991066.1;XP_054991065.1	26.7331	26.047	26.8719	25.5943	25.8988	26.7471	26.9795	26.9727	26.5142	25.5201	26.6098	27.0045	27.756	26.6174	26.7641	25.8808	25.3455	25.9708	26.2781	25.5199	26.169	25.5982	26.3882	26.4712
XP_054991127.1;XP_054974255.1	23.4796	22.7548	24.3324	24.8972	24.2632	22.5949	22.7256	23.5705	22.9908	23.4584	24.1816	24.5736	23.5839	23.8748	24.2214	24.5275	25.512	23.789	25.1194	23.7286	25.0227	25.3186	24.1169	25.2581
XP_054991141.1;XP_054991134.1	24.4989	23.9862	24.081	23.9524	24.3826	24.4973	24.2782	24.1298	24.035	24.3333	24.3471	24.5132	23.6955	22.8403	24.7064	25.582	23.6044	24.2438	24.6035	25.1896	24.9744	24.3121	24.5708	25.0901
XP_054991139.1	22.1822	19.5531	18.3658	19.6003	18.6849	19.1227	19.0501	19.8853	21.0132	21.7522	18.3927	21.014	19.1827	19.8679	23.4922	23.7928	18.4746	22.189	21.9497	22.595	22.3044	19.1926	20.9316	22.7196
XP_054991153.1	23.9703	23.2369	24.4485	24.0539	23.6024	23.307	24.4392	24.439	24.2138	23.458	25.0614	24.2329	24.9394	24.5448	24.557	24.2755	23.1295	24.1652	24.2715	23.402	23.561	24.8376	23.8775	24.1803
XP_054991214.1;XP_054991213.1;XP_054991212.1	18.6718	20.312	21.4242	21.0694	19.1037	18.4213	18.6691	19.0515	19.5497	18.3541	18.3207	19.0624	19.2469	19.2454	19.0245	21.746	19.8763	19.9523	21.6982	21.7018	20.3949	21.3135	20.9829	22.1339
XP_054991247.1;XP_054979157.1;XP_054979156.1;XP_012790120.2;XP_054979155.1	21.6297	19.0977	23.1624	20.28	18.0916	20.0058	18.879	16.7137	17.9018	21.5274	21.4026	22.4651	20.5406	21.9297	24.7618	25.826	22.0824	22.3686	21.953	24.7113	24.6815	24.4831	24.6675	23.6748
XP_054991256.1	23.086	22.4968	23.8343	23.3328	19.0707	22.9477	23.6825	24.0476	23.6872	22.5011	22.4357	23.0413	23.0501	23.0424	23.1811	21.7704	22.5014	22.3733	22.9395	22.9799	23.5819	24.1212	24.0783	23.1904
XP_054991268.1	21.126	20.0408	22.1488	21.3185	19.7847	20.9217	21.2951	21.2275	20.8708	20.9085	21.4999	20.1307	21.1148	20.5987	21.5828	21.6955	20.627	19.934	21.1724	20.2096	21.879	19.3062	21.6455	20.9001
XP_054991300.1	24.8903	24.6177	25.6481	25.6198	25.3928	24.0512	23.785	24.7412	24.809	24.2586	24.7097	24.596	25.0243	24.1185	25.2165	24.6404	24.7295	24.315	24.4798	24.2163	24.5377	25.0205	25.6136	25.3834
XP_054991321.1;XP_054986951.1;XP_054997149.1;XP_054986950.1;XP_054986949.1;XP_054991322.1	22.0923	21.3249	22.3553	22.2383	20.0648	21.2953	21.9326	21.4159	19.968	18.6089	22.7219	22.5183	22.431	22.7202	23.1628	22.7608	22.1043	22.372	23.3142	21.8371	21.6796	18.233	22.4496	19.941
XP_054991451.1	23.1946	19.1042	23.56	22.6129	22.2729	22.4167	23.7379	21.4772	22.8761	22.9586	23.3155	23.2188	23.235	22.0235	23.4083	22.7724	22.2074	22.5122	23.4035	22.9927	22.0644	21.5788	22.1892	22.3284
XP_054991475.1;XP_054991474.1;XP_054991473.1;XP_054991472.1	19.2398	20.7273	19.2896	20.0503	19.3045	20.7015	18.5258	19.5108	20.3985	18.2952	19.2319	18.8255	17.83	20.4352	19.245	19.2116	18.3764	19.4017	19.4266	19.0707	19.3938	19.6869	20.3963	18.3315
XP_054991479.1	20.8375	18.9667	20.8915	18.9975	19.707	20.6921	21.7719	21.2403	21.4162	18.1147	22.2783	21.4951	21.2207	21.0048	20.6268	19.0118	20.3095	20.641	20.2524	18.8419	20.2042	19.5102	20.7689	19.2665
XP_054991483.1;XP_054991477.1;XP_004615794.1;XP_004619359.1;XP_004618313.2	24.2359	24.2376	24.2065	23.9289	23.7634	24.4554	24.2899	24.54	24.2453	23.9788	24.1876	23.6762	24.4067	24.381	24.0507	23.4311	23.1179	23.6101	22.905	23.2614	23.2536	23.4366	23.5971	23.4916
XP_054991496.1	20.1933	19.8331	19.8765	19.8635	20.1834	19.9031	20.4395	20.4662	19.0847	19.4449	21.7633	19.0535	19.29	22.4066	21.7478	21.539	19.9304	22.0749	20.5654	18.1708	20.1203	19.0894	21.7354	19.9724
XP_054991513.1	21.7105	22.5838	23.3088	22.5447	21.3888	22.2538	22.3252	20.956	22.3163	21.6136	23.9916	23.8788	23.7026	22.3666	24.2701	23.5348	20.4257	23.4233	23.1376	21.3832	22.5449	21.6193	23.5489	23.1203
XP_054991544.1	29.2031	28.4263	28.2299	28.9295	28.4497	28.5536	29.1879	28.6292	28.6564	28.6391	28.0075	28.2331	28.3645	29.447	28.2783	28.2278	27.9234	27.9268	28.9014	28.2641	28.2223	28.9168	28.0111	28.1678
XP_054991603.1;XP_054991602.1	23.9302	24.3592	24.639	25.3498	24.0144	24.1363	24.2505	24.5579	24.3566	23.4648	24.7376	23.8672	25.0698	23.6112	23.8458	23.6311	25.568	23.8229	24.0532	23.7073	22.8889	27.8418	22.8029	24.0377
XP_054991653.1	27.591	27.4844	28.3679	28.6614	27.9319	27.7686	27.8307	28.5203	27.611	27.6884	28.6961	28.1863	28.6094	28.3646	28.2575	28.296	29.0794	28.3347	28.585	28.077	28.8336	28.6307	28.4293	28.6767
XP_054991657.1;XP_054991656.1;XP_004606270.2;XP_012787609.2	25.5492	26.0456	26.2764	25.5911	25.6118	25.6486	26.0594	26.4995	26.0515	25.5957	26.2409	26.5628	26.6626	26.199	27.0498	26.6248	25.6507	26.3718	25.9569	25.8531	25.7591	25.5509	27.1034	25.767
XP_054991711.1;XP_054991710.1	21.4279	19.4613	21.0674	22.9862	18.5142	18.7329	19.2587	18.9613	21.0754	19.1152	21.2633	21.4786	19.8164	21.4161	20.3949	20.165	21.6297	19.119	21.813	22.8238	22.1104	21.4645	22.3926	22.7226
XP_054991717.1;XP_054991716.1;XP_054991715.1;XP_054987652.1;XP_054987651.1	23.3243	23.4416	23.3141	23.3135	22.5667	22.4483	22.782	21.9374	18.9095	22.1919	22.691	22.4524	22.7361	23.1103	22.1616	21.8067	22.3134	22.9419	22.8112	22.8227	22.2888	23.3476	23.1895	22.582
XP_054991737.1;XP_054991746.1;XP_012788785.2	18.455	20.8818	23.0921	24.0577	23.2538	22.9263	22.1088	22.8456	21.8443	22.308	22.9968	23.6264	22.8195	23.2303	22.3715	22.8467	25.2557	23.4117	24.603	22.5336	24.3698	24.214	23.029	24.7114
XP_054991769.1	24.5424	24.196	23.9845	23.8833	23.8351	23.2274	24.5743	23.9603	24.6696	23.5049	23.4328	24.7173	23.8207	23.1906	24.0733	23.9345	23.8028	23.8239	24.0757	23.2235	23.565	24.7327	24.0792	23.6593
XP_054991771.1	22.4689	18.1802	22.7123	22.6275	22.0537	21.4498	22.3656	19.788	22.3327	19.2522	22.6555	22.3111	21.9825	21.0326	22.0364	21.4094	21.3319	21.1097	19.6551	19.4039	19.5398	18.7778	22.3984	21.6013
XP_054991912.1	22.0235	22.5488	21.9965	21.3263	21.0589	22.5627	22.5965	21.5647	21.3949	21.6277	22.4407	19.4243	21.7325	21.6415	21.4622	19.2421	19.9715	18.452	21.3042	21.2927	21.5154	21.1597	22.6226	21.1167
XP_054991925.1;XP_054991923.1;XP_054985564.1;XP_054985563.1;XP_054984446.1;XP_054999143.1;XP_054998947.1;XP_054997081.1;XP_054996043.1;XP_054992730.1;XP_054992468.1;XP_054989355.1	25.1575	24.503	25.3249	25.2141	24.8364	24.6578	25.7838	25.4517	24.8227	24.1771	25.0331	24.9487	25.5854	25.4107	25.7251	25.3735	23.8822	25.2646	25.0748	24.4122	24.7922	24.7682	25.6719	25.0035
XP_054991926.1	25.076	23.2904	25.4617	24.7567	24.5837	24.9617	25.0945	25.5777	25.2991	24.8658	24.1224	24.9053	25.2527	25.1212	23.8839	23.7338	23.7445	24.2224	24.4616	23.5863	24.0025	23.3232	24.8515	23.8194
XP_054991954.1;XP_054991953.1;XP_054991952.1	21.7543	21.5275	20.5899	20.5689	21.3351	22.7393	22.022	23.103	22.5671	21.9774	23.3814	22.8574	22.4713	21.9685	22.0826	21.1044	21.2762	22.2097	22.9901	21.3225	22.7036	21.4532	23.2192	21.4193
XP_054992080.1;XP_054992079.1;XP_054992078.1;XP_054992077.1	20.3083	20.5402	20.9699	18.9282	18.5422	21.7684	20.5596	21.1265	21.0564	21.299	20.1588	19.5905	19.8166	21.6395	20.2868	19.4773	20.1373	19.7546	19.6362	18.6675	19.5624	20.0011	20.6029	20.8029
XP_054992093.1;XP_054998096.1	26.4182	25.2838	26.6014	26.2577	26.524	25.3422	25.7405	26.0369	25.4779	25.7475	26.8315	27.333	26.7281	26.2905	25.9366	26.1881	26.216	25.7818	26.1757	26.4014	26.7052	26.799	26.1136	26.2888
XP_054992112.1	19.1518	17.7803	21.0639	21.77	22.1287	20.1529	18.6888	19.1179	20.2751	18.4209	22.2823	23.568	21.1782	22.3131	21.1637	20.9003	23.3652	20.1828	24.1172	18.7417	20.8549	22.264	20.7203	22.9289
XP_054992117.1	22.4599	22.1408	22.9656	23.555	21.7874	22.9443	22.8339	22.9012	22.7773	22.4579	22.6738	22.3797	23.0772	22.3737	22.3265	22.5784	24.9705	22.3379	22.911	22.2053	22.1534	21.5632	22.2383	22.3448
XP_054992149.1	19.7765	19.4978	19.6677	19.4365	20.1954	19.6061	19.0624	19.2583	20.2022	21.8199	18.3401	22.0082	21.943	19.6545	19.6819	20.932	23.1152	19.8551	20.9699	20.1666	19.8967	19.7623	21.7978	19.2453
XP_054992159.1	19.0601	19.7303	19.7528	20.2788	18.5476	20.8651	23.7533	21.712	21.9113	20.9604	22.1494	21.8928	22.24	22.1996	21.5151	21.1216	18.9435	20.3865	21.1592	21.8464	19.3599	21.795	20.7838	20.5376
XP_054992194.1	19.251	16.5207	18.626	21.1321	19.2889	19.382	19.9488	19.5319	18.428	19.0932	19.3643	21.5841	22.5869	18.5697	19.142	20.2878	20.1024	19.9124	20.8664	19.0756	21.1376	18.8255	20.1772	20.3093
XP_054992207.1	21.0927	18.7294	23.0244	19.7554	19.7424	21.3439	22.4189	22.5137	19.1523	19.7923	21.5028	21.8317	19.9116	19.2198	21.8576	19.7189	19.7678	21.2481	20.7568	21.1572	20.602	18.4567	20.1895	20.9266
XP_054992213.1;XP_054992212.1;XP_054992211.1;XP_054992210.1;XP_054992209.1	20.6873	18.0258	20.7451	21.2572	20.3064	20.5232	18.4709	20.4864	21.0253	18.9255	21.065	19.7236	19.2984	19.9658	19.4546	20.6234	18.0302	19.8131	19.1878	18.9892	19.0198	18.7285	20.5162	19.4477
XP_054992245.1	22.7222	19.2064	22.4549	23.9851	21.2924	23.3624	22.0173	21.2667	22.0198	22.6695	22.7472	20.7578	19.6734	21.0915	23.3636	23.5337	24.1472	20.9167	23.3972	19.1747	24.2504	23.263	23.5706	24.3219
XP_054992276.1;XP_054992277.1;XP_004605917.1	25.8066	26.9733	25.5791	26.0366	25.5639	25.6964	26.5774	26.4155	26.6649	25.8179	26.6752	25.8813	25.7046	26.6919	25.6813	25.0466	25.5665	25.5882	25.6716	25.5854	24.8289	25.1372	25.955	25.2577
XP_054992303.1;XP_054992302.1;XP_054992301.1;XP_054992300.1;XP_054992299.1;XP_054992298.1;XP_054992297.1	19.3597	18.7568	18.7946	20.8811	21.2428	20.7508	20.5277	19.4805	21.3766	17.7508	20.6366	19.137	21.4635	19.7264	21.0061	19.8062	20.3304	20.0797	20.1462	20.3522	20.2349	20.6674	21.1768	20.6862
XP_054992428.1	18.909	17.8402	19.401	22.6658	22.9769	22.7028	21.7362	23.5781	18.8349	19.5206	23.5267	22.4774	22.158	19.6342	22.0112	19.9232	21.9585	19.3478	21.9414	18.7574	22.3304	22.4928	22.7725	21.9054
XP_054992441.1	19.8863	19.1216	20.6918	20.3952	20.7109	19.7052	20.0625	20.7743	21.7369	18.252	18.3153	19.7945	20.0965	19.9444	19.1518	19.2984	20.4087	19.6082	21.092	18.9709	21.1307	21.1945	20.9564	21.1779
XP_054992444.1	24.8177	23.9628	23.9041	23.1458	23.4994	22.975	24.4262	23.603	23.7779	23.2439	24.2588	23.079	23.5314	22.6764	23.0118	22.287	22.3572	21.8497	22.946	21.1889	22.5725	20.9984	21.9397	22.0946
XP_054992482.1	22.3552	21.6256	22.8423	21.9095	21.8548	22.1978	21.9775	22.3523	22.4003	21.8881	22.4226	21.8034	21.3193	21.2843	21.8083	21.28	18.7673	21.3914	20.3487	21.5036	19.9417	20.0463	22.0078	19.1919
XP_054992497.1	18.8703	20.0612	20.7756	22.4449	21.7337	19.5822	19.8574	19.7065	18.9894	17.9545	18.9901	20.6952	20.0159	19.8124	19.2228	19.5065	22.0989	19.3077	21.3456	18.1924	19.8805	21.6486	20.6269	20.2521
XP_054992503.1;XP_054992502.1;XP_054992501.1;XP_054992500.1;XP_054993235.1	21.5707	23.1636	23.0916	24.0884	24.0015	23.7009	24.4159	24.7651	23.6155	24.4667	24.8377	24.0523	24.6768	24.4377	24.5532	20.493	25.0745	24.4048	24.0864	22.0614	22.8554	21.8967	23.6292	22.8055
XP_054992567.1	24.1614	23.1145	24.5582	23.159	22.9103	24.1463	24.3076	24.211	24.5903	24.2018	24.5822	23.2168	23.7421	24.2486	23.8163	23.3931	22.9355	23.0549	23.6989	23.5312	23.0181	23.1958	23.0456	23.7691
XP_054992595.1	23.386	23.0454	24.091	24.3143	24.1296	22.995	22.9889	24.0532	23.5281	22.8466	23.2631	23.8396	23.9532	23.1363	23.5891	23.5135	23.8638	22.9467	23.6158	23.536	23.754	24.8569	23.8777	24.3836
XP_054992638.1	25.2546	24.4026	25.9358	25.8838	25.1091	25.2625	25.3983	25.739	25.2059	24.7886	26.1772	26.4059	26.1631	25.8632	25.6956	25.8511	25.4029	25.6625	25.8	25.9289	25.727	25.9504	25.9796	25.8515
XP_054992683.1	18.7535	21.4645	21.9324	22.6003	19.9958	22.4444	19.7875	21.8765	18.9886	20.3684	18.373	19.3564	21.6325	18.8479	18.214	18.5036	23.4706	20.9441	20.4466	22.0805	21.0044	22.9236	19.4411	21.8644
XP_054992728.1	19.0236	19.7381	22.5223	22.1026	21.8476	22.2343	22.126	22.1923	21.9538	22.7852	20.8655	21.5417	21.6325	21.656	22.2161	22.7652	21.507	20.8913	21.2565	22.8776	21.9569	21.586	22.9184	22.0075
XP_054992806.1;XP_054992805.1;XP_054992804.1	20.5854	18.2328	22.1139	20.7517	20.4845	19.2798	20.6333	20.6399	18.2747	21.8115	21.6848	21.4533	21.8198	20.008	21.7646	21.8505	19.3882	21.4422	21.3727	18.9611	20.4196	20.15	21.8024	20.7634
XP_054992841.1;XP_054992842.1;XP_004605081.1	22.732	21.7804	23.149	22.9495	23.5685	22.0342	22.6733	22.2929	22.5437	22.2907	22.2015	22.8957	22.7311	22.2546	22.3633	23.0989	22.0933	22.2938	22.0011	21.9238	23.5645	22.0388	23.4383	21.9359
XP_054992874.1	24.5559	23.7674	24.546	24.7949	23.9432	24.2755	24.5828	25.0014	24.9346	24.7295	24.7679	24.9578	24.9733	24.318	24.2046	23.8253	24.2787	24.1193	24.4709	23.9408	24.725	23.8038	24.4821	24.4707
XP_054992965.1;XP_054992966.1	22.5456	21.665	21.2576	20.0214	21.2998	18.6098	22.4042	23.2591	23.9335	21.9623	22.7692	22.4522	22.6698	24.533	21.9793	20.9776	22.9282	21.2512	21.8067	21.4882	18.8859	20.4447	19.3686	21.1796
XP_054993265.1;XP_054993251.1;XP_054993101.1;XP_054992968.1;XP_054993215.1;XP_054993151.1;XP_054993032.1;XP_054992932.1;XP_054993257.1;XP_054993136.1;XP_054993141.1;XP_054993140.1;XP_054993138.1;XP_054993137.1;XP_054993143.1;XP_054993135.1;XP_054993134.1;XP_054993142.1;XP_054993144.1;XP_054993133.1	21.375	18.7515	21.9023	21.5871	22.7721	21.6785	20.6744	22.6187	22.3263	19.8686	22.3427	22.2622	22.2131	22.42	20.9996	21.0746	22.9825	21.8396	22.6209	20.0118	21.7073	22.1111	22.1165	22.0611
XP_054992981.1;XP_054988641.1	24.0514	24.7018	24.6519	24.1264	24.1223	24.7429	24.9166	25.412	24.8093	24.7901	25.3327	24.2224	24.9553	25.2779	24.8107	24.2643	24.5493	24.2428	25.8397	23.6639	24.0448	24.834	25.1181	24.8639
XP_054993001.1	22.6559	18.3487	23.791	22.3554	20.395	23.0385	22.4468	21.6936	23.0387	22.3349	22.5708	23.3457	22.865	22.4701	21.9861	21.8313	24.8702	22.0166	22.796	22.628	23.4016	22.0222	22.351	23.3676
XP_054993034.1	18.2453	19.0508	19.7965	20.3717	20.7408	19.718	19.7646	18.7817	19.565	18.4757	20.2294	20.1309	19.8926	18.8377	18.9677	19.151	25.2405	19.1981	22.6051	18.6317	19.8086	18.8382	18.8978	21.6769
XP_054993052.1;XP_054993051.1	20.9783	19.3185	21.5463	20.584	19.4822	17.8506	20.812	20.4482	21.2238	20.1689	19.843	20.3433	20.429	18.5068	19.0436	19.8059	20.5333	18.8349	20.5519	19.7563	18.991	18.5259	20.8701	20.9853
XP_054993059.1	25.4145	23.9222	24.9792	25.2343	24.2715	24.4852	24.4134	24.7437	24.5806	23.9261	24.6671	25.1707	24.4815	24.4258	24.4947	24.1544	24.2362	23.2057	24.5088	23.4051	24.1943	24.652	24.7014	24.6617
XP_054993130.1	19.3659	19.8758	18.8171	20.2817	22.421	19.8947	19.3293	19.5687	20.3349	19.918	20.7975	20.6851	19.8458	19.7229	20.1377	19.9869	22.0249	19.7484	20.2841	19.6882	21.624	18.8055	18.3796	20.4296
XP_054993131.1	28.6632	27.6347	28.2145	28.6765	28.3569	28.3039	28.2727	28.174	27.6878	28.1872	27.8516	28.2589	28.3896	28.1597	28.4422	28.3163	28.506	28.4254	28.8179	28.0056	28.1137	28.6754	28.0663	28.7265
XP_054997768.1;XP_054993220.1	30.0145	29.6772	29.6597	28.7946	29.1815	29.8958	29.7973	29.6094	29.8306	29.0918	29.5028	29.136	29.0627	28.563	28.7739	29.0123	28.499	28.8223	28.8564	28.851	29.1794	29.0303	28.8494	29.2398
XP_054993249.1	19.6458	18.337	22.2093	22.2104	21.6284	22.8229	21.4286	19.9192	22.1298	21.3793	22.4874	22.2538	21.9765	21.4154	19.1564	22.577	21.6101	21.3955	22.3763	20.2574	21.7839	22.107	21.6376	22.1577
XP_054993270.1	23.2295	23.3788	23.3392	21.6819	23.0863	23.1435	22.9476	23.5156	22.8443	22.7747	22.8133	22.1216	23.2774	22.3684	22.5543	22.3916	21.757	23.0906	21.9437	25.2044	21.946	23.0733	22.9888	22.5845
XP_054993290.1;XP_054999545.1	23.8593	25.1176	24.4348	23.9284	23.4275	26.7808	24.6785	25.0098	24.8809	25.0192	25.3973	24.7112	24.623	24.7958	24.4378	23.735	24.0755	24.3131	24.2944	23.9632	23.7466	23.5823	24.9676	24.2206
XP_054993389.1	25.7175	24.8288	25.6163	24.6946	25.9726	25.0278	24.1102	24.3666	25.0193	25.8814	25.8717	25.65	25.0639	25.2751	25.6961	26.5926	25.0221	24.6011	25.7428	26.5993	26.3234	26.2329	27.0644	26.2702
XP_054993395.1;XP_004606087.1	24.7526	24.5631	25.2416	25.0826	24.8494	24.2927	24.8658	24.9863	24.7048	24.1221	24.7929	24.9257	25.2388	24.9078	24.7606	24.4942	23.9961	24.3676	24.1109	24.2095	24.6465	24.3297	25.1992	24.5857
XP_054993466.1;XP_004611494.1	22.1208	18.8997	22.0039	20.2096	22.4387	22.4083	23.1892	22.5516	22.9336	24.6849	17.6556	21.5962	20.2414	18.5777	21.0362	22.4604	19.6646	20.9545	18.9045	22.4413	24.0973	21.0849	22.7832	21.5078
XP_054993501.1	23.159	22.8402	23.7468	23.1402	22.7153	22.9581	23.2952	23.3119	23.8174	23.3229	23.3437	22.9242	23.1103	22.8838	22.4178	21.6695	21.8549	22.5292	22.9639	21.5243	21.6689	21.8041	21.797	21.9747
XP_054993506.1;XP_054993505.1	22.5729	22.5079	23.205	23.1973	22.9955	21.6755	23.2305	22.5282	22.0453	21.6474	22.8463	22.7566	22.739	22.1671	23.2129	22.3808	22.3677	22.2784	23.1331	22.0645	23.4244	22.6896	22.9076	23.4492
XP_054993568.1;XP_054993567.1	26.1668	26.0307	25.3002	25.6651	25.4111	26.5162	26.3517	26.9423	26.9246	26.6172	26.9655	26.3097	25.9492	25.2322	26.2679	25.9886	25.5033	26.602	26.1968	26.6699	25.697	26.6835	25.2814	26.1804
XP_054993572.1;XP_054993571.1;XP_054993570.1	25.2275	24.2058	24.5996	24.8955	24.467	25.0922	25.2487	25.4757	24.8256	24.7845	25.0146	24.8997	24.8058	24.8491	24.6745	24.6766	24.7472	24.7347	24.9674	25.1135	24.922	24.9124	25.0466	25.1494
XP_054993576.1;XP_054999090.1	23.8433	23.9057	23.5898	23.0093	23.5309	23.7358	23.8058	24.0279	24.2481	23.4225	24.84	23.9251	23.9653	24.0464	23.4806	22.5401	23.2869	23.5087	23.1385	22.7581	22.3028	23.325	22.9956	23.7532
XP_054993593.1	22.6109	22.7226	23.165	23.6329	23.0731	22.5925	22.5704	23.2451	23.1866	21.7214	22.8103	23.4175	23.7214	22.5745	22.98	23.8518	23.269	23.4828	23.5486	23.5485	23.7046	24.0768	24.1148	23.459
XP_054993629.1;XP_054993628.1;XP_054993611.1;XP_054993612.1;XP_054993613.1;XP_054993614.1;XP_054993616.1;XP_054993617.1;XP_054993618.1;XP_054993619.1;XP_054993620.1;XP_054993621.1;XP_054993622.1;XP_054993623.1;XP_054993630.1;XP_054993624.1;XP_054993625.1;XP_054993626.1;XP_054993627.1;XP_054993610.1	22.0622	18.4286	21.5023	21.9058	19.7047	21.7341	22.2749	22.4545	22.4349	20.2061	21.1155	21.4533	22.1329	20.6794	20.6155	18.518	19.1965	17.9465	19.481	19.4209	19.7572	20.8266	21.1309	21.2577
XP_054993634.1;XP_054993633.1;XP_054993636.1;XP_054993635.1;XP_054993632.1	19.8791	18.8557	18.9708	19.5078	20.122	18.2918	19.9521	20.4773	19.4843	19.8812	18.9366	18.3702	19.2769	18.9954	19.261	19.5065	19.1796	19.8923	19.1826	19.5555	20.2622	19.2516	20.028	18.6902
XP_054993812.1;XP_054993813.1	23.3066	22.6677	24.2204	23.1721	23.0524	23.1011	23.1565	23.0344	23.5416	23.4257	23.1348	23.4478	23.0338	22.7027	23.3839	22.667	22.5028	22.5901	22.8675	22.3622	23.1543	22.0592	23.3951	23.0417
XP_054993842.1;XP_054993851.1	22.5866	22.7601	23.4846	22.57	22.5902	21.2403	22.7167	22.7435	22.3861	19.6527	22.3933	22.7733	23.5584	20.1768	23.2505	22.0729	21.9384	20.7013	21.6022	20.5454	23.236	22.5323	22.6851	23.2249
XP_054993873.1	23.1378	21.65	22.3544	22.5471	21.1071	22.6392	22.9706	22.6535	22.7817	21.4128	21.7702	22.4039	22.1481	21.0975	21.4058	22.0297	22.0874	22.8961	19.8893	22.5835	21.4695	22.6166	22.2094	22.0244
XP_054993926.1;XP_054993925.1;XP_054993924.1;XP_004605358.2	27.9523	27.2522	28.5519	28.1932	27.8054	27.6956	28.1799	28.0235	28.4734	27.8517	28.2254	27.902	28.0556	28.0511	28.1484	27.7094	27.825	27.8585	28.0051	27.6486	27.8383	27.8081	28.6324	27.8734
XP_054994050.1;XP_054974804.1	25.8685	23.7699	24.6366	25.4176	24.6141	25.6796	26.0203	25.1904	25.0333	25.1524	23.8224	24.4636	25.4229	23.9921	24.6183	24.6294	26.9785	26.0381	24.682	25.9864	23.7056	24.7048	23.929	25.0416
XP_054994091.1	19.9758	19.7062	21.8071	20.699	21.3879	21.1908	18.7014	20.4614	20.6818	18.2234	19.7123	19.1302	21.5494	20.003	20.2253	18.7758	19.1931	18.6262	20.586	19.8145	20.0121	18.572	20.2	20.6047
XP_054994214.1	28.6507	28.4015	28.5487	27.8701	27.9974	28.5793	29.1014	29.1447	28.4215	28.1335	28.6368	28.1693	28.8027	27.9514	28.6686	28.1082	27.7215	27.8671	28.2203	27.3523	27.9712	27.8125	28.0743	28.1795
XP_054994254.1;XP_054994225.1;XP_054994218.1;XP_054994250.1;XP_054994240.1;REV__XP_054997591.1;REV__XP_054974466.1;REV__XP_054997594.1;REV__XP_054997593.1;REV__XP_054974473.1;REV__XP_054997592.1;REV__XP_054974465.1;REV__XP_054997589.1;REV__XP_054974458.1;REV__XP_054974464.1;REV__XP_054974463.1;REV__XP_054974462.1;REV__XP_054974461.1;REV__XP_054974459.1;REV__XP_004602758.1;REV__XP_004602759.1;REV_…	23.9355	24.226	24.4061	23.7235	24.0406	23.3593	24.0086	23.9678	24.094	23.2618	23.6721	23.6528	23.838	22.6029	23.5116	23.468	21.9714	22.8457	23.056	23.3188	24.2062	23.0807	24.0513	23.3058
XP_054994334.1;XP_054994333.1;XP_054994332.1;XP_054994331.1	21.9955	18.6496	21.7869	17.8836	20.035	22.5716	21.6117	19.9666	22.0514	18.4918	20.8399	18.8511	22.4618	18.87	20.8455	19.324	19.2103	20.8226	18.7957	20.0562	18.9624	18.9722	20.7864	19.4619
XP_054994495.1	19.2505	18.7941	19.5166	19.8336	20.4562	20.8497	22.2778	20.9084	20.4849	18.8391	20.4057	19.6301	19.1112	17.9349	19.2403	18.5028	19.2145	20.2866	19.5936	19.3418	19.4847	18.5813	19.0282	19.1369
XP_054994591.1;XP_054994590.1	21.9129	19.4584	22.423	22.3636	22.1769	21.8508	21.9393	22.2025	22.2047	22.1226	22.4859	22.1973	22.4669	21.7308	23.0878	22.2738	21.9236	21.8915	22.5278	23.0966	22.3583	22.5517	22.1335	21.2519
XP_054994670.1	25.6221	25.1539	25.2682	25.1753	24.5854	25.1606	26.0546	26.0127	25.4518	25.1273	26.1269	25.8183	26.116	25.9086	25.7542	26.5007	26.275	26.365	26.3746	25.5054	26.309	26.0511	25.8771	25.8533
XP_054994673.1;XP_054994672.1	20.2978	18.9648	21.0173	19.5112	18.6087	18.9308	20.9622	20.6169	20.7336	19.4623	18.5138	20.4817	20.9308	19.2485	19.2427	19.3242	18.9728	19.4102	19.5816	17.6546	19.7391	19.8957	20.23	20.3097
XP_054994696.1;XP_012789010.2	24.6569	23.9435	24.6146	24.096	23.9412	24.8814	24.915	25.0354	24.9778	25.1645	25.1061	25.0739	24.7156	24.4248	25.255	24.9795	23.6918	24.3834	24.3363	24.3314	23.5068	23.7681	24.9347	24.0573
XP_054994722.1	23.8973	24.1496	25.2729	26.2864	25.8597	24.4628	24.5538	25.1007	24.9811	24.4361	25.6502	25.9871	25.7557	25.3107	24.4293	24.9758	26.7516	24.9259	26.2162	25.1523	25.3259	26.5657	26.0595	25.9833
XP_054994773.1	28.5368	28.1002	29.5219	30.2842	29.9913	28.5076	28.6028	29.492	28.3799	28.4269	29.1837	29.7665	29.1103	29.1534	28.9898	29.2302	31.1409	29.1139	30.2632	29.0841	29.9639	30.7726	29.6973	30.2866
XP_054994790.1;XP_054995037.1;XP_054995036.1	21.6292	19.8572	23.7804	25.047	24.1516	21.809	21.2775	23.222	21.4704	21.8889	22.8805	23.5916	22.967	21.1153	23.3339	23.8425	25.4915	23.1518	24.7061	22.579	24.4566	24.1993	23.3438	24.8771
XP_054994868.1	21.7133	21.7166	22.4151	21.9951	21.6581	21.6772	22.2371	22.6898	23.4343	23.0622	22.8236	22.518	22.976	22.9313	22.5359	21.5899	21.491	21.6381	22.1356	20.7988	21.188	21.3808	23.3628	21.8141
XP_054994900.1	21.5148	18.482	20.8856	20.9171	21.3383	20.9183	21.4743	20.088	21.3096	21.5514	18.8686	21.6672	20.8431	20.7852	21.3013	19.5231	21.5147	18.9106	18.6194	20.1495	20.6971	19.5939	20.1198	19.7825
XP_054994929.1;XP_004610928.2	23.0058	21.1396	23.8011	22.1613	23.879	23.8688	22.9289	23.0353	23.8066	24.6061	24.8051	24.2153	25.1413	24.7063	25.3451	24.5468	23.8833	23.1557	23.9406	23.3901	22.6326	22.5889	24.073	22.9543
XP_054994931.1	24.3683	24.4355	24.3882	24.4793	24.7609	24.5866	25.154	25.1676	24.2407	24.2573	24.5942	24.481	25.1279	24.8662	24.3762	23.8075	23.9922	25.0322	24.4692	24.8928	24.7849	24.7438	24.9224	25.0465
XP_054994947.1;XP_054994948.1	20.4724	20.5954	21.3325	18.1012	20.0477	19.453	20.6985	20.535	19.4337	20.2505	20.7796	19.2914	21.742	20.3262	20.5229	18.6273	19.2841	18.0714	20.2089	19.0939	20.4725	19.7611	20.127	19.9586
XP_054994957.1	22.1699	18.4545	19.1165	25.5651	18.9522	20.8869	18.5171	18.5043	21.4467	18.7443	18.6259	20.2175	20.4695	19.3502	19.0091	19.1436	19.7404	19.2465	19.9163	18.5892	20.0267	19.9571	20.8304	19.9599
XP_054994961.1;XP_004620761.2;XP_004613825.1;XP_054979263.1;XP_055001888.1;XP_004604569.2	23.2079	23.1606	24.6616	25.118	24.3978	23.3207	23.5815	23.7333	23.0964	23.0683	23.8842	24.3994	23.504	23.205	23.2761	23.8775	25.1279	23.5757	24.4446	23.0151	24.578	24.8245	23.8678	24.8022
XP_054994972.1	22.182	22.5044	22.2531	22.5964	22.3284	21.4696	22.2384	22.8543	23.0561	20.5242	22.9873	21.9166	22.0692	21.942	21.6641	21.4969	22.1352	21.6129	22.6563	21.4683	21.3324	22.2893	22.6729	22.1648
XP_054994985.1;XP_054994984.1;XP_054994983.1;XP_054994982.1;XP_054994981.1;XP_054994980.1;XP_054994979.1;XP_054994978.1	22.3037	21.209	22.6498	23.3164	21.6409	23.0186	23.6813	23.0744	23.0906	22.4762	21.8804	21.5121	22.7395	22.462	21.5633	20.3123	19.8578	22.7035	20.4887	23.3793	21.16	20.8292	21.1557	20.8356
XP_054995027.1;XP_054995019.1	19.4616	20.0193	19.0456	20.3361	18.9465	21.5194	20.6667	20.0355	19.4844	18.8542	20.8225	19.0589	19.9479	20.3709	19.8972	18.2581	19.447	19.3363	19.5009	18.8239	19.4305	19.7786	20.4866	21.1392
XP_054995035.1	20.3818	20.3558	20.5184	20.4939	20.8796	20.1666	19.9573	20.2587	20.4489	20.3112	20.4455	20.8798	20.7059	19.8373	20.3332	19.4244	18.4919	19.3743	19.5495	20.2314	20.7836	20.4296	20.3057	19.4163
XP_054995051.1;XP_054995050.1;XP_054995049.1	19.325	20.6493	19.7005	21.359	20.4965	18.8745	20.8461	20.9008	21.6137	21.6132	21.0921	19.1064	19.6243	19.9662	19.3283	19.8091	21.3012	18.8983	19.8253	18.3874	19.8575	19.2413	21.3642	19.4793
XP_054995080.1;XP_054995079.1;XP_054995077.1;XP_054995078.1	22.8097	22.2415	24.1596	23.6668	23.3529	23.0486	23.4113	23.8649	23.2536	23.1713	23.6449	23.4605	23.1495	22.4391	23.5894	23.4937	23.0641	23.1472	23.7936	23.9647	23.7443	24.1851	23.656	24.126
XP_054995084.1;XP_054995083.1	21.6793	21.0828	21.5732	21.4802	19.3222	21.7532	21.9411	22.4659	22.1895	19.3233	21.7644	21.7461	21.8375	19.9283	21.1231	20.6212	20.6877	21.4741	18.7011	21.398	19.1404	21.0634	22.1901	22.0316
XP_054995160.1	23.3159	23.0879	24.4664	23.9215	23.5594	23.0917	23.6361	24.3268	24.1216	23.1948	23.9041	24.1145	24.6104	23.5493	24.0712	23.4219	23.3396	23.2574	23.9633	22.7415	23.2684	23.4363	24.7255	23.8246
XP_054995182.1	25.721	25.3218	26.2208	25.8727	25.3365	25.5261	25.7165	26.1552	26.2106	25.3319	26.2867	25.571	26.0284	25.1939	25.468	24.9864	24.7877	25.3297	25.0546	27.1507	25.4964	25.0161	26.0564	24.9088
XP_054995184.1;XP_054995183.1	23.9705	20.9004	23.5482	23.1415	20.1181	22.9319	23.5778	23.2651	23.677	23.557	23.4919	23.7898	22.2692	23.674	23.2167	22.5653	22.5482	23.1515	23.1956	22.4089	23.4851	22.6444	23.532	22.0081
XP_054995218.1;XP_054996823.1;XP_054996822.1;XP_054996821.1;XP_054996819.1;XP_054988726.1;XP_054988725.1;XP_054988724.1;XP_054988723.1;XP_054988722.1;XP_054988721.1;XP_054988720.1;XP_054988719.1	22.7122	23.1789	22.734	23.9429	23.2706	22.1874	23.1146	23.4418	23.9787	21.7774	22.9234	21.7386	22.6226	23.3605	21.2285	21.1695	22.6682	22.8004	22.4851	21.2499	21.1854	22.3897	23.6676	20.4033
XP_054995237.1	22.5826	22.4077	22.8727	22.5495	21.479	23.0664	22.5651	22.8417	23.23	23.0809	22.7733	22.6597	22.6929	22.3291	22.1376	22.7175	21.3432	21.9719	21.7873	21.9412	22.4653	21.8781	23.0507	22.0316
XP_054995308.1	23.1488	22.5034	22.7029	21.8095	22.2804	22.8309	23.3052	22.2074	22.9358	23.5281	23.874	23.0244	22.5746	22.493	22.4661	22.1876	21.6414	21.3089	22.0236	22.1205	22.621	22.2893	23.302	22.6391
XP_054995312.1	18.8887	23.2203	19.5817	19.3322	19.4551	22.6051	22.9019	20.0387	20.3933	18.8904	20.0832	23.2425	24.4907	23.188	22.4226	23.1943	22.8113	23.7101	22.7653	19.3299	19.699	23.2689	24.6067	23.2853
XP_054995323.1;XP_055002008.1	22.4142	22.6149	22.4841	21.9945	21.6904	22.6211	23.449	23.3708	23.1754	22.7876	22.4763	22.3344	22.206	22.0564	21.749	21.2673	19.4275	21.4132	20.7965	22.293	21.4275	22.411	21.5551	21.4344
XP_054995351.1	19.1793	19.5037	21.1389	20.7569	20.451	19.0163	20.9913	18.4003	19.5614	19.0761	19.1407	19.3545	19.1782	19.3095	19.2486	19.0429	20.2404	19.9237	19.1581	19.2056	23.4794	19.1947	20.8379	20.2688
XP_054995390.1;XP_054995389.1;XP_055000647.1;XP_055000462.1;XP_055000317.1;XP_055000437.1	24.5609	23.1898	24.1066	22.2261	22.5077	23.8625	23.7607	24.5505	23.6703	23.137	24.6959	24.434	24.6524	22.5603	23.7023	24.1191	22.3705	23.1355	24.1655	20.2928	23.0823	22.4593	23.0553	23.5768
XP_054995415.1	26.4658	25.6406	26.7677	27.3931	26.8673	26.0597	26.263	27.2888	26.7221	25.8978	26.4102	26.4303	26.745	26.5454	25.4849	25.67	26.6228	26.3171	27.0956	26.7256	26.8847	27.1211	26.8968	26.7598
XP_054995520.1;XP_054995519.1;XP_054995518.1;XP_054995517.1;XP_054995516.1;XP_054995515.1;XP_054995514.1;XP_054995513.1;XP_054976991.1;XP_004614513.1	20.3386	19.5104	20.5931	20.7909	20.7663	19.6951	18.646	21.0743	20.6518	17.419	19.393	20.0786	20.9208	18.6539	18.3937	19.4684	20.4957	18.4876	20.7442	19.6657	18.7935	18.4617	19.1709	20.4403
XP_054995567.1;XP_012789492.2;XP_054988740.1	23.335	20.6794	24.4903	23.6827	23.0899	23.0804	23.8677	23.7014	23.5281	23.5336	23.7049	23.8473	23.5768	23.7088	22.9326	23.1778	23.2185	23.5069	23.5362	22.4091	23.7899	23.47	23.8284	24.3096
XP_054995601.1;XP_054995600.1;XP_054995599.1;XP_054995598.1	18.5104	20.0249	19.0219	19.384	20.6355	20.594	21.8293	21.3682	21.61	19.9072	19.5653	20.1866	23.4002	18.5976	20.4885	19.8657	19.0082	19.4594	18.9301	20.6992	20.271	19.5054	18.9583	19.8364
XP_054995645.1;XP_054995647.1;XP_054995648.1	21.8502	21.9323	22.2031	24.9057	24.5848	22.2655	22.4426	23.0757	23.202	22.7456	23.7171	24.8403	24.0227	23.4127	21.5676	22.7818	23.8291	23.5541	24.1828	24.5879	22.8963	23.7112	23.44	22.7982
XP_054995655.1;XP_054995654.1;XP_054995653.1;XP_054995652.1;XP_054995650.1	23.731	21.4525	22.5836	21.1632	21.727	23.1216	23.4	22.1891	23.1701	19.6319	18.716	19.2556	22.177	18.8637	21.7547	23.064	24.2763	19.1236	19.0706	20.8032	22.3563	25.6771	18.404	23.0282
XP_054995656.1	20.982	20.1515	21.674	21.9595	22.6308	18.9343	19.141	21.765	21.3275	22.4386	22.1138	21.9333	21.4654	21.5344	21.8173	20.849	22.9259	21.7941	21.9804	18.54	22.4593	21.6413	22.0911	21.955
XP_054995657.1	21.5851	20.219	21.948	21.0704	21.0854	22.7514	22.1137	21.3853	21.4494	23.1535	21.5036	21.0067	20.918	20.7543	23.274	22.4234	21.2098	21.3341	20.5028	22.8853	21.6063	21.9339	22.649	22.1303
XP_054995671.1;XP_054995672.1	24.1818	21.8034	23.6779	23.3396	23.594	23.1933	24.3894	24.1327	24.158	23.7745	24.0962	23.5916	23.86	23.0538	23.8846	23.4381	22.7522	23.1359	23.9244	22.6886	23.7371	22.8769	23.532	23.2277
XP_054995680.1;XP_054996544.1	25.6146	24.4878	23.1977	22.4866	19.2191	24.2909	22.6829	24.3981	19.9138	23.8352	24.8329	24.5362	22.637	21.8386	25.3755	23.3438	21.6607	23.6737	19.8841	24.2185	24.2547	21.4647	18.83	24.2263
XP_054999326.1;XP_054995692.1	25.0929	25.9763	25.3601	24.4855	25.3024	26.0412	25.6827	25.9823	25.8667	25.9599	25.7832	25.741	25.3324	25.0037	25.2401	24.9104	25.8487	25.6298	24.8095	26.1803	24.5526	25.2825	25.1283	25.2741
XP_054995756.1	20.849	20.0127	22.3174	21.7858	21.3497	20.7484	20.9668	21.8922	21.4195	21.5211	21.7967	21.8379	21.7696	21.2021	21.8103	21.7359	21.0223	21.6193	21.4709	20.7659	21.022	21.2186	22.1328	21.2878
XP_054995782.1	23.3924	21.3065	21.9788	21.356	21.1972	21.6	23.0423	21.9868	21.2935	20.7465	22.1442	22.6882	20.8514	19.3425	22.1072	22.1716	21.6164	20.8494	22.7994	22.9356	23.8208	21.7908	23.2035	22.4839
XP_054995798.1;XP_054995799.1	24.2491	25.6212	25.2265	24.6515	25.0688	24.3383	24.7783	25.0744	24.981	24.0084	25.6274	24.8189	25.2541	26.0356	25.7438	25.0386	24.9155	24.5871	24.4549	24.1097	24.8017	24.2292	24.907	24.374
XP_054995809.1	24.5142	22.6054	25.666	23.97	27.2719	26.0995	24.0539	22.1314	24.7037	19.0562	24.1437	22.5064	23.3859	23.2351	24.9914	23.609	21.3029	19.4684	22.2528	23.7701	24.5777	20.5067	23.1911	23.5966
XP_054995918.1	20.9731	19.1368	22.2006	21.0018	21.2753	18.5564	18.7424	21.5449	19.8426	18.2234	21.7534	19.9948	21.0942	19.1455	20.29	21.7455	20.2834	19.1378	19.6762	24.4809	21.1421	21.1911	19.5387	21.7199
XP_054995980.1	20.4341	17.9589	18.7354	19.3314	21.0258	19.3025	18.7609	19.3802	19.2474	19.2613	21.0444	18.8902	20.3044	19.5324	20.0917	20.6188	18.7166	19.0945	19.0793	19.7972	21.5643	19.9038	22.3854	21.1927
XP_054995981.1	20.1507	19.1114	20.1428	18.7131	20.6682	21.0409	19.1389	19.1435	19.0563	19.743	19.1943	20.2228	19.973	19.6304	20.1444	20.1635	21.4298	19.9986	21.1178	19.494	20.4372	24.8464	22.2024	19.5329
XP_054995983.1	20.7538	19.3859	22.2996	20.1892	19.7006	18.6321	19.1299	19.4167	19.2772	19.2265	20.7623	19.6526	18.8282	18.8275	22.432	20.786	21.1703	19.857	21.1129	18.3759	21.5958	21.5361	23.5326	21.6739
XP_054995986.1	19.3421	19.4033	20.8232	22.1422	19.1467	20.0592	19.3474	21.4157	19.8089	19.1853	18.5846	20.0407	20.5856	20.7646	19.4087	20.8235	22.0383	19.8282	20.6702	21.1067	19.0613	22.5205	21.6219	21.1984
XP_054996030.1	26.5683	25.5506	26.7247	26.8425	26.9035	26.5815	25.6519	26.3365	26.4605	26.3599	26.1381	26.1309	26.0602	25.4492	25.9502	25.6015	25.6927	25.6411	26.6803	25.8565	26.4485	26.0556	25.7839	26.1918
XP_054996130.1	19.1458	19.6218	22.108	22.1816	21.8218	19.613	20.6212	21.8169	22.6608	19.2817	21.2089	21.6342	19.0888	18.9111	20.9982	21.3952	23.4359	20.9883	22.2411	21.6303	22.0708	21.6303	21.9673	22.9791
XP_054996158.1;XP_054996159.1;XP_054988297.1;XP_004604944.1;XP_054988298.1	25.9217	23.9813	25.3835	24.2019	24.2765	25.094	24.9816	24.7901	24.7429	25.8279	24.7461	24.6661	24.8698	24.1701	24.7243	25.0499	23.9793	24.9241	25.1565	24.7126	23.6217	24.2737	23.8761	24.6131
XP_054996161.1;XP_054996160.1	21.4057	21.0192	21.9404	21.3605	19.3853	21.1028	21.2579	21.4137	18.5184	20.4893	20.9374	21.6396	22.5405	21.4812	21.7874	20.96	20.157	20.672	21.0385	21.4547	21.429	19.7834	22.0013	19.1492
XP_054996212.1	23.9148	22.8027	24.6396	25.6211	25.3737	22.8128	20.7863	23.8313	23.0764	18.5004	22.7784	23.1357	22.8067	20.4965	17.636	18.3332	20.5329	17.2728	18.3769	18.0583	22.9239	22.6356	23.6939	22.6476
XP_054996217.1	23.1641	24.2605	24.1574	23.7237	23.9091	24.0839	23.4902	22.7458	23.5371	23.689	24.0562	24.096	23.383	24.7105	25.5251	22.9032	22.6089	23.9605	22.5808	23.6015	25.3675	22.0793	24.2701	21.8348
XP_054996248.1	24.4193	23.2294	24.1398	24.6192	24.1293	24.5358	24.4019	24.5097	24.6151	24.1311	24.6814	24.5302	24.2318	23.6672	24.0664	23.4646	24.9345	24.1541	24.4601	24.1036	24.3884	24.8975	23.9791	24.715
XP_054996252.1;XP_054996251.1;XP_054996250.1;XP_054996249.1	22.0268	21.824	21.9487	21.0748	21.6221	22.0928	22.1705	22.3589	22.072	20.8588	22.0132	21.7295	21.5549	21.595	20.9181	21.4004	20.4106	21.4662	20.7625	22.65	22.7512	22.6029	21.1103	21.9034
XP_054996258.1;XP_054996257.1;XP_054996256.1	18.3809	24.9796	22.8839	30.2246	17.7163	17.4435	31.9193	17.2344	16.1685	15.8556	15.604	17.5141	16.6167	16.5484	16.2152	19.182	22.0456	19.8176	19.8406	19.9567	20.0707	18.8965	19.2764	21.437
XP_054996327.1;XP_054977910.1	23.6202	22.747	22.8115	22.1518	22.9041	23.5709	22.9556	23.2964	22.6731	22.689	22.7058	22.6364	22.1135	21.7383	22.9261	22.5696	22.5072	21.9921	20.7529	22.5599	23.0705	22.0012	21.9593	22.4669
[truncated: 183 more rows]
