# Supplementary material for: Dynamic metabolic and molecular changes during seasonal shrinking in Sorex araneus
Source: HighWire-hosted journal article supplement (doi:10.1101/gr.280639.125), 2025-11-04
Supplement: Supplemental_Data.zip [file Supplemental_Data_S10.xlsx]

## Sheet: Sheet1
Genes	Module	Gene Correlation	p-value
ATP2B4	black	0.649966	0.000586433
TNIK	black	0.645728	0.000654357
ATP2C2	black	0.627177	0.0010377
SLC25A12	black	0.61868	0.00126953
CHRNA2	black	0.612468	0.00146587
LOC101555226	black	0.610179	0.00154452
BPIFB6	black	0.604609	0.00175108
LOC129404438	black	0.602692	0.00182742
LOC101541425	black	0.600915	0.00190068
NADSYN1	black	0.583837	0.00274231
PTPN13	black	0.570897	0.00357379
LOC101546106	black	0.5682	0.00377152
LOC129403553	black	0.565649	0.00396704
SPON1	black	0.563151	0.00416659
LOC129403064	black	0.561828	0.0042757
LMTK3	black	0.555563	0.00482566
GPR61	black	0.536988	0.00681684
MFRP	black	0.526405	0.00822996
LOC101545880	black	0.525153	0.00841213
DPYSL2	black	0.524775	0.00846781
PRTFDC1	black	0.524521	0.00850538
LCNL1	black	0.524196	0.00855371
OTUD3	black	0.521207	0.00900842
LOC101538291	black	0.51398	0.0101915
LOC105942791	black	0.512414	0.0104641
FAM229B	black	0.509357	0.0110136
INF2	black	0.508551	0.0111623
CA9	black	0.4907	0.014907
GABRB1	black	0.486973	0.015806
LOC101554161	black	0.484336	0.0164682
LOC101557570	black	0.482411	0.0169661
PDXDC1	black	-0.479159	0.0178346
LOC101541023	black	0.474769	0.0190641
CCDC40	black	0.471962	0.0198857
TMEM249	black	0.471896	0.0199054
NDRG2	black	0.471598	0.0199944
PTGDS	black	0.46648	0.0215731
BAHD1	black	0.466444	0.0215845
THOC7	black	-0.463374	0.0225795
CROCC	black	0.461009	0.0233707
C3H17orf100	black	0.460565	0.0235219
FBXL21P	black	0.460343	0.0235974
DPP9	black	0.455933	0.0251448
LOC101555625	black	0.451786	0.0266734
RAB38	black	0.443811	0.0298219
EXT1	black	-0.442542	0.030349
LOC101536990	black	-0.440909	0.0310386
CDA	black	0.440533	0.0311989
LOC129405897	black	0.437025	0.0327287
KISS1R	black	0.436943	0.0327653
NPW	black	0.435791	0.0332807
LOC101553012	black	0.435763	0.0332933
TAMM41	black	0.434962	0.0336557
SIK3	black	0.433703	0.0342318
LOC129404053	black	0.432175	0.0349408
WDR97	black	0.43011	0.0359182
CPA6	black	0.424491	0.0386872
LOC129404383	black	0.422648	0.0396313
ARMH2	black	0.421932	0.0400032
GDF5	black	0.421932	0.0400032
LOC101541168	black	0.421932	0.0400032
LOC129406775	black	0.421932	0.0400032
LOC129400013	black	0.4217	0.040124
HTR3B	black	0.417916	0.0421387
LOC101544362	black	0.417916	0.0421387
LOC101558123	black	0.417916	0.0421387
LOC129398799	black	0.417916	0.0421387
LOC129402404	black	0.417916	0.0421387
LOC129405724	black	0.417521	0.0423535
LOC101552305	black	-0.41564	0.0433883
NPM2	black	0.412117	0.0453796
SMYD1	black	0.411996	0.0454492
SPG21	black	0.410497	0.0463188
LOC101549698	black	0.409284	0.0470325
DNAI2	black	0.406326	0.0488076
TTLL10	black	0.402098	0.0514358
LOC129402012	black	0.397969	0.0541072
GYS1	black	0.397885	0.0541623
COL4A5	black	0.397616	0.05434
ASCL1	black	0.397464	0.0544409
PMCH	black	0.396542	0.0550547
LOC101553167	black	0.393447	0.0571545
IZUMO4	black	0.393174	0.0573432
PCED1B	black	0.391518	0.0584944
LOC129403713	black	0.3912	0.0587175
LOC129403714	black	0.3912	0.0587175
CAPN8	black	0.390124	0.0594778
LOC129402129	black	0.389834	0.059684
PRRT1B	black	0.384706	0.0634209
RNF148	black	0.383829	0.0640774
LOC129401781	black	0.383337	0.064448
CD63	black	0.382067	0.0654127
CTLA4	black	0.381351	0.0659613
LLCFC1	black	0.380083	0.0669409
TMEM255A	black	0.379432	0.0674487
LOC129403282	black	0.376916	0.0694375
LOC129399475	black	0.373849	0.0719227
BFSP1	black	0.371794	0.0736254
NR2C1	black	-0.371267	0.0740668
LOC129405124	black	0.371001	0.0742904
LOC129407097	black	0.366366	0.0782694
LHFPL7	black	0.364988	0.0794826
USP24	black	0.364838	0.079616
DUSP2	black	-0.361497	0.0826212
SREBF1	black	0.360334	0.0836863
OSTF1	black	-0.360031	0.0839662
RRM2B	black	0.359547	0.0844136
LOC129403375	black	0.3594	0.0845505
LOC129404578	black	0.3594	0.0845505
MMP20	black	0.3594	0.0845505
VWDE	black	0.3594	0.0845505
LOC129403287	black	0.356864	0.0869285
TCN1	black	0.355774	0.0879654
CLEC11A	black	0.353636	0.0900272
GPR171	black	0.352655	0.0909862
TRPV4	black	0.351199	0.0924216
TMEM187	black	-0.350704	0.0929137
NMNAT3	black	0.350333	0.0932837
MEX3A	black	0.349527	0.0940917
LOC129406897	black	0.346662	0.0970044
LOC101551351	black	-0.344288	0.0994689
TP63	black	0.341295	0.102642
UNG	black	0.33997	0.10407
LOC101542031	black	0.339129	0.104984
MEIKIN	black	0.337541	0.106727
GFY	black	0.337178	0.107128
LIPM	black	0.33703	0.107292
TEX48	black	0.337002	0.107323
SBK3	black	0.336926	0.107407
PASD1	black	0.334977	0.109585
LOC101556011	black	0.334608	0.11
NPY1R	black	0.331474	0.113579
LOC129399170	black	0.330856	0.114295
CPLANE2	black	0.327428	0.118325
LOC129406461	black	0.326306	0.119666
LOC129399919	black	0.324245	0.122158
LOC129406534	black	0.324245	0.122158
LOC129406806	black	0.324245	0.122158
DUSP15	black	0.324127	0.122303
SOX12	black	0.321421	0.125634
COL28A1	black	0.320083	0.127307
PARD6B	black	-0.317308	0.130825
SGO1	black	0.316984	0.13124
LOC129402593	black	-0.315713	0.132878
LOC129402582	black	-0.315017	0.133781
MOXD1	black	0.314687	0.134212
TMEM106C	black	0.314269	0.134757
CENATAC	black	0.313872	0.135278
LOC129402570	black	0.311423	0.138517
SCRIB	black	0.307117	0.144348
KLHL3	black	0.306844	0.144723
ANKRD22	black	0.30534	0.146804
GPR132	black	0.304306	0.148246
FUBP3	black	-0.303132	0.149897
TBX21	black	-0.30119	0.152654
LOC129406030	black	0.301053	0.152852
TMEM241	black	0.300571	0.153542
FAM83G	black	0.300097	0.154224
GRHL1	black	0.299663	0.154849
UPK3A	black	0.298267	0.156874
LOC129406502	black	0.296257	0.159823
FAM114A2	black	-0.29391	0.163316
LOC129402541	black	0.293429	0.164037
DBH	black	0.292998	0.164686
ARID3A	black	0.292002	0.166193
SPATA46	black	0.291675	0.16669
C3H11orf54	black	0.289797	0.169563
LOC101546765	black	0.289597	0.169872
MS4A3	black	0.288714	0.171235
KY	black	0.287742	0.172747
UNC5D	black	0.286926	0.174021
LOC105943134	black	0.286816	0.174195
CEP43	black	0.286128	0.175276
IGF2BP1	black	0.286104	0.175313
LOC105943172	black	0.286062	0.17538
TFCP2L1	black	0.286062	0.17538
GNL1	black	0.284277	0.178207
LOC129404385	black	0.283729	0.179082
ITPRID1	black	0.283491	0.179463
LOC129406904	black	0.282526	0.181012
LOC129404261	black	0.281897	0.182027
GFOD2	black	0.279463	0.185992
NHERF4	black	0.278101	0.188236
LOC129401654	black	0.277592	0.189079
NT5DC3	black	0.276955	0.190137
LOC129405499	black	0.276278	0.191269
SEPHS1	black	-0.274643	0.194016
LOC129406817	black	0.274389	0.194446
LOC101547095	black	0.274015	0.195079
TBC1D1	black	0.273226	0.19642
LOC129398787	black	0.271985	0.198541
LOC129403344	black	0.270563	0.200991
JCAD	black	0.270075	0.201837
LOC129406582	black	0.269551	0.202747
ANO9	black	0.267848	0.205725
LOC129402872	black	0.26745	0.206426
CALHM4	black	0.266319	0.208424
LOC101537909	black	0.266319	0.208424
ABCG1	black	0.264235	0.212143
PRRC2B	black	0.261895	0.216368
TMEM120B	black	0.261766	0.216602
LOC129402410	black	0.261378	0.217309
ATP5F1E	black	0.259969	0.21989
KIF1C	black	0.259419	0.220902
LOC129406888	black	0.257766	0.223962
LOC129403644	black	0.255736	0.227761
C3H11orf65	black	0.255131	0.228901
ILF3	black	-0.254353	0.230373
ATXN7L2	black	0.251601	0.235628
NDE1	black	-0.251319	0.236172
WDFY3	black	0.250355	0.238034
STK24	black	-0.250134	0.238463
LOC101542134	black	-0.25005	0.238624
SH3BGR	black	0.24804	0.242545
PDE4A	black	0.247288	0.244023
NPY5R	black	0.245427	0.247705
ADGRF1	black	0.244976	0.248603
ATP6V1G3	black	0.244976	0.248603
C5H1orf185	black	0.244976	0.248603
DNAJC5G	black	0.244976	0.248603
EFCAB9	black	0.244976	0.248603
GPR50	black	0.244976	0.248603
LITAFD	black	0.244976	0.248603
LOC101538768	black	0.244976	0.248603
LOC101542192	black	0.244976	0.248603
LOC101543046	black	0.244976	0.248603
LOC101544476	black	0.244976	0.248603
LOC101546394	black	0.244976	0.248603
LOC101546432	black	0.244976	0.248603
LOC101550614	black	0.244976	0.248603
LOC101551832	black	0.244976	0.248603
LOC101552298	black	0.244976	0.248603
LOC105942825	black	0.244976	0.248603
LOC105943411	black	0.244976	0.248603
LOC129398937	black	0.244976	0.248603
LOC129398955	black	0.244976	0.248603
LOC129398956	black	0.244976	0.248603
LOC129399274	black	0.244976	0.248603
LOC129399275	black	0.244976	0.248603
LOC129399283	black	0.244976	0.248603
LOC129399478	black	0.244976	0.248603
LOC129399539	black	0.244976	0.248603
LOC129400371	black	0.244976	0.248603
LOC129400372	black	0.244976	0.248603
LOC129400373	black	0.244976	0.248603
LOC129400374	black	0.244976	0.248603
LOC129400375	black	0.244976	0.248603
LOC129400376	black	0.244976	0.248603
LOC129400377	black	0.244976	0.248603
LOC129400378	black	0.244976	0.248603
LOC129400379	black	0.244976	0.248603
LOC129400957	black	0.244976	0.248603
LOC129401224	black	0.244976	0.248603
LOC129401225	black	0.244976	0.248603
LOC129401226	black	0.244976	0.248603
LOC129401227	black	0.244976	0.248603
LOC129401228	black	0.244976	0.248603
LOC129401229	black	0.244976	0.248603
LOC129401230	black	0.244976	0.248603
LOC129401231	black	0.244976	0.248603
LOC129401232	black	0.244976	0.248603
LOC129401233	black	0.244976	0.248603
LOC129401234	black	0.244976	0.248603
LOC129401235	black	0.244976	0.248603
LOC129401236	black	0.244976	0.248603
LOC129401237	black	0.244976	0.248603
LOC129401238	black	0.244976	0.248603
LOC129401443	black	0.244976	0.248603
LOC129401508	black	0.244976	0.248603
LOC129402758	black	0.244976	0.248603
LOC129402759	black	0.244976	0.248603
LOC129402760	black	0.244976	0.248603
LOC129402761	black	0.244976	0.248603
LOC129402762	black	0.244976	0.248603
LOC129402763	black	0.244976	0.248603
LOC129402765	black	0.244976	0.248603
LOC129403077	black	0.244976	0.248603
LOC129403779	black	0.244976	0.248603
LOC129403780	black	0.244976	0.248603
LOC129403781	black	0.244976	0.248603
LOC129403782	black	0.244976	0.248603
LOC129403783	black	0.244976	0.248603
LOC129403784	black	0.244976	0.248603
LOC129403785	black	0.244976	0.248603
LOC129403786	black	0.244976	0.248603
LOC129403788	black	0.244976	0.248603
LOC129403789	black	0.244976	0.248603
LOC129404298	black	0.244976	0.248603
LOC129404499	black	0.244976	0.248603
LOC129404500	black	0.244976	0.248603
LOC129404501	black	0.244976	0.248603
LOC129404502	black	0.244976	0.248603
LOC129404505	black	0.244976	0.248603
LOC129405207	black	0.244976	0.248603
LOC129405208	black	0.244976	0.248603
LOC129405400	black	0.244976	0.248603
LOC129405953	black	0.244976	0.248603
LOC129406120	black	0.244976	0.248603
LOC129406161	black	0.244976	0.248603
LOC129406162	black	0.244976	0.248603
LOC129406163	black	0.244976	0.248603
LOC129406164	black	0.244976	0.248603
LOC129406165	black	0.244976	0.248603
LOC129406338	black	0.244976	0.248603
LOC129406521	black	0.244976	0.248603
LOC129406718	black	0.244976	0.248603
LOC129406732	black	0.244976	0.248603
LOC129406733	black	0.244976	0.248603
LOC129406932	black	0.244976	0.248603
LOC129406933	black	0.244976	0.248603
OVGP1	black	0.244976	0.248603
PRSS55	black	0.244976	0.248603
RTL4	black	0.244976	0.248603
TAS2R42	black	0.244976	0.248603
TBX4	black	0.244976	0.248603
TEPP	black	0.244976	0.248603
ZBBX	black	0.244976	0.248603
C3H17orf99	black	0.243497	0.251561
C1QTNF12	black	0.242287	0.253998
PACSIN3	black	0.241967	0.254646
LOC101552987	black	0.24112	0.256362
CCL5	black	-0.240656	0.257308
LOC129407096	black	0.240079	0.258485
LOC129405437	black	0.239112	0.260466
LOC101538318	black	0.239019	0.260656
TMEM271	black	0.238865	0.260973
PRKCH	black	-0.238421	0.261887
FGD1	black	0.23813	0.262488
SLC9A4	black	0.237576	0.263632
LOC129401940	black	0.236784	0.265275
LOC101545275	black	0.236251	0.266384
TRPM4	black	0.234327	0.270412
LOC129401643	black	0.232802	0.273631
MYBL2	black	-0.232394	0.274498
LOC129404810	black	0.231004	0.277459
LOC129404184	black	-0.230181	0.279223
ROM1	black	0.22939	0.280925
ODAD4	black	0.227953	0.284033
RPL31	black	0.227418	0.285195
SELENOK	black	-0.227027	0.286047
THAP11	black	0.226164	0.28793
POLR3E	black	0.225992	0.288307
LOC129406135	black	0.225165	0.290124
ARHGEF10L	black	0.225091	0.290286
LOC129402735	black	0.224401	0.291805
ICOS	black	0.224224	0.292197
S100A5	black	0.223759	0.293225
LOC101543454	black	0.221953	0.297241
IL27	black	0.220408	0.300701
ZNF316	black	0.218726	0.304499
CCR4	black	0.218357	0.305336
LOC101555148	black	0.21784	0.306512
TSC1	black	0.216651	0.309224
CIITA	black	0.214761	0.313567
CCDC15	black	-0.214703	0.3137
LOC129401646	black	0.213886	0.31559
LOC129400006	black	-0.213709	0.316001
STIM1	black	0.213221	0.317132
AMPD1	black	0.211565	0.320994
EGR2	black	0.21109	0.322107
LOC101543157	black	0.210144	0.324332
ABCB6	black	0.206439	0.333128
DYNC2LI1	black	0.205581	0.335186
ELMO3	black	0.205131	0.336269
DGKI	black	0.204739	0.337214
ACTN3	black	0.202942	0.341564
DDX39B	black	0.201876	0.344158
SUSD3	black	0.201016	0.346262
BRD7	black	-0.200276	0.348077
TNKS1BP1	black	0.199922	0.348947
PLAG1	black	0.19924	0.350629
SHC4	black	0.198594	0.352225
LIM2	black	0.195771	0.35925
LOC129402837	black	0.194473	0.362509
MAFA	black	0.193581	0.364756
COL9A1	black	0.19306	0.366074
LOC101550657	black	0.192483	0.367537
LOC129405412	black	0.192111	0.368481
LOC129405681	black	-0.192044	0.36865
BTBD9	black	-0.191625	0.369717
LOC105943569	black	0.191538	0.369938
LOC129406706	black	0.191008	0.371289
DNAH7	black	0.190154	0.373472
TKT	black	-0.188717	0.377161
DNAH11	black	0.187613	0.380008
TNFRSF4	black	0.186134	0.383844
VEGFD	black	0.185083	0.386583
SOS1	black	0.183666	0.390295
GFRA4	black	0.183101	0.391778
LOC129404723	black	0.182913	0.392274
ATP8B2	black	0.182616	0.393056
CCDC149	black	0.181689	0.395504
LOC105942995	black	0.180006	0.399969
CFAP54	black	-0.179353	0.40171
CENPW	black	-0.178514	0.403951
LOC129403512	black	0.178333	0.404437
LYG2	black	-0.176597	0.409101
LOC129403974	black	-0.175385	0.412374
TCOF1	black	-0.174786	0.413997
LOC129400076	black	-0.174436	0.414949
LSM14B	black	-0.174165	0.415685
PPP2R5C	black	-0.172835	0.419309
LOC129399129	black	0.172038	0.421491
MRPL39	black	-0.17203	0.421514
ZFHX2	black	0.171644	0.42257
ZFTA	black	0.171254	0.423642
PROKR2	black	0.170835	0.424794
NDNF	black	0.170757	0.425008
LOC129399134	black	0.169461	0.428582
LOC129403582	black	0.169446	0.428624
OMD	black	-0.169334	0.428935
LOC129403584	black	0.168278	0.431862
INO80E	black	-0.167539	0.433914
FTMT	black	0.167243	0.434738
NFKBIL1	black	0.166279	0.437431
LOC101557460	black	0.166258	0.437488
LOC101549163	black	0.1662	0.437651
LOC129402155	black	0.162755	0.447341
ABCA7	black	0.161544	0.450773
TVP23A	black	-0.160793	0.45291
LOC129405082	black	0.159884	0.455501
TOX	black	0.158078	0.460673
ZBTB32	black	0.157639	0.461935
TNNT1	black	0.156802	0.464348
NR6A1	black	0.156452	0.465357
LOC129403342	black	0.155656	0.46766
CIART	black	0.155216	0.468934
CCDC65	black	0.153999	0.472469
OVOL1	black	0.153085	0.475134
ANKRD66	black	0.152339	0.477314
SLC1A6	black	0.151786	0.478932
REM2	black	0.151736	0.479081
PLPP2	black	-0.151669	0.479276
PLEKHF1	black	0.151506	0.479754
CNGB1	black	0.149911	0.484443
CXCR6	black	-0.148605	0.488301
CDHR4	black	0.148313	0.489168
LOC129406647	black	0.147901	0.490389
MAPK7	black	0.146611	0.494222
RTN4IP1	black	-0.146434	0.49475
LOC129404256	black	0.145962	0.496157
IQCE	black	0.144975	0.499104
LOC129403313	black	-0.144751	0.499775
LOC101543630	black	0.143943	0.502198
LOC129404867	black	0.141813	0.50861
LOC129404363	black	-0.1364	0.525083
SERINC4	black	-0.13483	0.529907
CCL22	black	-0.134769	0.530095
ZP3	black	0.133994	0.532485
SH2D2A	black	-0.131591	0.539929
LOC129402133	black	0.131524	0.540137
LOC129404172	black	0.12749	0.552739
GPR141	black	0.12632	0.556419
PPM1N	black	0.12632	0.556419
STAC3	black	0.124969	0.560683
TNFAIP1	black	0.124802	0.561211
KIAA2012	black	-0.123784	0.564437
DXO	black	-0.123113	0.566564
LOC129403955	black	0.122006	0.570085
RPGRIP1L	black	0.121925	0.570344
LOC101551627	black	0.121439	0.571891
LOC129404527	black	0.121439	0.571891
LOC101550938	black	0.11948	0.578155
PLEC	black	0.118236	0.582147
LOC129404206	black	0.118034	0.582796
CXCL11	black	0.117796	0.583564
RARS2	black	0.117503	0.584507
TAS2R40	black	0.117389	0.584873
LOC129399963	black	-0.117188	0.58552
PIK3C2G	black	0.115281	0.591679
LOC129401652	black	0.114323	0.594784
LOC129403507	black	0.114202	0.595175
LOC129405645	black	0.113899	0.596159
PLCG1	black	-0.113066	0.598867
MRPS22	black	-0.112634	0.600273
LOC129404932	black	0.111916	0.602613
ADAMTS12	black	-0.110974	0.60569
LOC129399864	black	0.109615	0.610138
ACTRT3	black	0.109582	0.610248
CDC6	black	0.109547	0.610361
LOC129405627	black	0.108413	0.614086
LOC101539425	black	-0.10625	0.621211
LOC105943077	black	0.106161	0.621506
LOC129404001	black	0.105754	0.622853
CLIC3	black	0.105043	0.625206
SMAD6	black	0.104119	0.628267
TATDN3	black	-0.103288	0.631027
PINX1	black	0.10286	0.632452
ZSCAN20	black	0.102707	0.63296
ITGB1BP2	black	0.101337	0.637525
HOXB4	black	-0.0999155	0.642276
LOC129405084	black	-0.0993414	0.644199
TNFSF8	black	0.0992881	0.644377
AP3S2	black	0.0974721	0.650474
LARGE1	black	0.095891	0.6558
LOC129402333	black	0.0923984	0.667622
LOC129403364	black	-0.0905254	0.673994
MLH3	black	-0.0880144	0.682571
LOC129403662	black	-0.0870159	0.685992
LOC129406795	black	0.0853497	0.691714
CHAF1B	black	-0.0846741	0.694039
RPTOR	black	0.0839762	0.696443
LOC129405323	black	0.0839619	0.696493
BTG3	black	-0.0823274	0.702135
LRRC30	black	-0.0805132	0.708416
LOC129405914	black	-0.0804111	0.70877
SPECC1	black	-0.0768145	0.721278
CENPO	black	0.0755245	0.725781
LOC129401920	black	0.0751902	0.72695
CIB3	black	0.075131	0.727157
SLC51A	black	0.0739219	0.731388
LOC129399414	black	-0.0706955	0.742717
LOC129406538	black	0.0701308	0.744705
IL2RB	black	-0.0699269	0.745423
ASCC2	black	-0.0698712	0.745619
LOC129406337	black	-0.0693158	0.747577
GPR108	black	-0.0686314	0.749991
MTMR9	black	-0.0685833	0.750161
LOC129403421	black	0.0678095	0.752894
MICAL3	black	0.0671542	0.75521
SLC2A7	black	0.0661167	0.758882
SYNE3	black	0.0658451	0.759844
LOC101537077	black	0.0652556	0.761934
REC114	black	0.0651453	0.762324
GPAT2	black	-0.0650023	0.762832
SIT1	black	0.0645852	0.764312
EIF2B4	black	-0.0618269	0.774117
BGLAP	black	0.0613696	0.775746
VIL1	black	0.0607023	0.778124
MYOD1	black	-0.0605589	0.778636
LOC105942796	black	0.0602177	0.779853
LOC129403699	black	0.0594542	0.782579
AKNA	black	0.0594012	0.782768
PAX8	black	0.0592265	0.783392
LOC101548920	black	0.0591615	0.783624
FAM166A	black	0.0558236	0.795573
APOA5	black	-0.0550569	0.798324
SEC24B	black	0.0526954	0.806811
LOC129406374	black	0.0523053	0.808215
LOC129402162	black	-0.0508747	0.813369
FLVCR1	black	0.0499974	0.816534
SPAG17	black	0.0494489	0.818514
DHDH	black	0.048742	0.821067
CDK5RAP2	black	0.0486045	0.821564
LOC129406794	black	0.0483037	0.822651
LOC129405596	black	0.0472704	0.826388
TGM7	black	0.046932	0.827612
ESRRA	black	0.0466869	0.8285
DDB1	black	0.0460586	0.830775
TNS1	black	0.0460069	0.830962
SLC7A6	black	-0.0456303	0.832327
GNB5	black	-0.0447752	0.835427
LOC129405552	black	0.0444937	0.836448
LOC101555066	black	-0.0438057	0.838944
A2ML1	black	-0.0433767	0.840502
NPR2	black	-0.0433727	0.840516
RPS3A	black	-0.0419258	0.845773
C1GALT1	black	0.0416495	0.846778
SIRPB2	black	-0.0408935	0.849528
WDR24	black	0.0408345	0.849743
LOC129401598	black	0.0406272	0.850497
ADAMTS16	black	0.039673	0.853971
PRF1	black	-0.0393681	0.855082
LOC129400659	black	0.0392822	0.855395
INTS3	black	-0.0376233	0.861443
C2H19orf44	black	0.0362257	0.866544
CAPN15	black	-0.0350224	0.87094
FMR1NB	black	0.0323161	0.880841
LOC101559191	black	-0.0289772	0.89308
PSAPL1	black	0.0285077	0.894803
RAB11FIP4	black	-0.0280076	0.896638
IGF2BP2	black	0.0268078	0.901044
UNC93A	black	0.0264609	0.902319
LOC101553367	black	-0.0261879	0.903322
PDE4C	black	-0.0249616	0.90783
TFIP11	black	-0.0238972	0.911745
MZB1	black	-0.0238297	0.911994
LOC129404066	black	0.0235635	0.912973
NR2E1	black	0.0235324	0.913087
CDCA7L	black	0.0225206	0.916811
CLEC20A	black	0.0207793	0.923224
METTL18	black	-0.0204445	0.924458
ANXA10	black	0.0200787	0.925806
TMEM30B	black	-0.0198161	0.926774
LOC129400801	black	0.0190346	0.929654
SLC5A11	black	0.0178616	0.93398
CD247	black	0.0164517	0.939181
LOC129404544	black	-0.0144399	0.946608
PKD2L2	black	0.0138168	0.948908
TMEM131L	black	0.0128246	0.952573
SERPINB11	black	-0.0123451	0.954344
LOC129402441	black	-0.0118881	0.956033
SSC4D	black	0.0110345	0.959187
LOC129399160	black	0.0100084	0.96298
LOC129402407	black	0.00964278	0.964331
LOC129406989	black	0.00891637	0.967017
AP3D1	black	0.00854109	0.968404
CFAP91	black	-0.00845491	0.968723
LOC129400851	black	0.00803253	0.970285
LOC129400059	black	-0.00758986	0.971922
SDCCAG8	black	0.00757516	0.971976
LOC101552157	black	-0.00407106	0.984937
MRTFA	black	-0.0035399	0.986902
CHRNA3	black	-0.00323743	0.988021
LOC101545393	black	-0.00304718	0.988725
LOC129403416	black	0.00221694	0.991797
ZACN	black	-0.00176564	0.993467
EOLA2	black	-0.00160197	0.994073
PRDM15	black	0.00153882	0.994306
TIGIT	black	0.00133242	0.99507
LOC101542512	black	0.00127169	0.995295
LOC129399934	black	0.00122569	0.995465
SLC28A3	blue	0.854774	1.05e-07
LIG1	blue	-0.84376	2.22e-07
IGFALS	blue	0.837356	3.35e-07
GLOD5	blue	-0.829416	5.44e-07
NAGLU	blue	0.829013	5.58e-07
CNOT1	blue	-0.82689	6.32e-07
RB1CC1	blue	-0.822395	8.19e-07
CROT	blue	-0.805294	2.07e-06
NTHL1	blue	0.800769	2.6e-06
TCEA1	blue	-0.800335	2.66e-06
CTR9	blue	-0.799981	2.71e-06
CDKN1C	blue	0.798297	2.95e-06
LBR	blue	-0.795795	3.33e-06
APLP2	blue	0.794837	3.49e-06
LMAN2L	blue	0.793082	3.8e-06
SMC6	blue	-0.791944	4.01e-06
PROZ	blue	0.785153	5.52e-06
SLC30A4	blue	-0.780359	6.87e-06
SSB	blue	-0.778949	7.32e-06
ALDH3A2	blue	-0.774281	8.99e-06
LOC101557547	blue	-0.773616	9.26e-06
FRG1	blue	-0.773203	9.43e-06
MET	blue	-0.771827	1e-05
NIT2	blue	-0.770948	1.04e-05
LRG1	blue	0.769188	1.12e-05
CCAR1	blue	-0.768963	1.13e-05
TMEM63A	blue	-0.766215	1.27e-05
GJC3	blue	0.764751	1.35e-05
RPS7	blue	-0.764424	1.37e-05
SMOX	blue	0.762443	1.49e-05
HSP90AA1	blue	-0.760002	1.64e-05
FAF1	blue	-0.759869	1.65e-05
SERBP1	blue	-0.758748	1.73e-05
XPO5	blue	-0.758711	1.73e-05
BAZ1B	blue	-0.757664	1.81e-05
BLTP2	blue	-0.75669	1.88e-05
LOC101537810	blue	-0.756373	1.9e-05
RRM1	blue	0.755848	1.94e-05
LOC101550735	blue	-0.75555	1.97e-05
PPID	blue	-0.752236	2.24e-05
TSR1	blue	-0.749927	2.45e-05
AHSA1	blue	-0.749803	2.46e-05
SON	blue	-0.749331	2.51e-05
MGLL	blue	0.746762	2.77e-05
LOC101540995	blue	0.744667	3e-05
PSMD11	blue	-0.743256	3.17e-05
RNF130	blue	0.74237	3.27e-05
TMEM38A	blue	0.739825	3.6e-05
BPNT1	blue	-0.739664	3.62e-05
SACM1L	blue	-0.739434	3.65e-05
UNC13A	blue	0.73887	3.73e-05
IDE	blue	-0.737112	3.98e-05
ST13	blue	-0.735772	4.18e-05
PKN2	blue	-0.73089	4.98e-05
SNW1	blue	-0.729295	5.27e-05
USP9X	blue	-0.729098	5.31e-05
UBE2I	blue	0.728875	5.35e-05
STIP1	blue	-0.727999	5.52e-05
UBXN4	blue	-0.727936	5.53e-05
VTN	blue	0.727846	5.55e-05
DDX18	blue	-0.727832	5.55e-05
NUDT3	blue	0.727153	5.69e-05
AMBP	blue	0.726839	5.75e-05
MAN2A1	blue	-0.725112	6.11e-05
CHPF	blue	0.723604	6.44e-05
PCP4L1	blue	0.723299	6.51e-05
SET	blue	-0.721927	6.82e-05
IPO5	blue	-0.720508	7.16e-05
DNAJB12	blue	-0.719815	7.33e-05
PPT1	blue	-0.719265	7.47e-05
FNIP2	blue	-0.719044	7.53e-05
LOC129406982	blue	0.718934	7.56e-05
TJP1	blue	-0.718916	7.56e-05
LOC129406495	blue	0.717611	7.9e-05
LOC101554449	blue	-0.717307	7.98e-05
PCMTD1	blue	-0.715584	8.46e-05
DAO	blue	-0.714265	8.84e-05
ZC3H15	blue	-0.71262	9.33e-05
MCM3AP	blue	-0.712473	9.38e-05
MED23	blue	-0.712308	9.43e-05
THPO	blue	0.711024	9.84e-05
HSPA4	blue	-0.711009	9.84e-05
DYNC1I2	blue	-0.709725	0.000102659
PSEN2	blue	0.709526	0.000103331
DHX30	blue	-0.708918	0.000105399
PRPS2	blue	-0.708283	0.000107598
MRPS24	blue	0.708036	0.000108465
ANP32E	blue	-0.707528	0.000110265
GNL3L	blue	-0.707273	0.000111179
EEF1A1	blue	-0.706499	0.000113992
SLC35F5	blue	-0.70534	0.000118325
RHOT1	blue	-0.704705	0.000120756
EBNA1BP2	blue	-0.700794	0.000136729
SOWAHA	blue	0.700731	0.000137001
USP14	blue	-0.700638	0.000137404
ALPK3	blue	0.700015	0.000140124
PPA1	blue	-0.699915	0.000140563
LOC101549522	blue	-0.699513	0.00014235
TMPO	blue	-0.69909	0.000144248
EIF3E	blue	-0.698994	0.000144684
FAM241B	blue	0.698917	0.000145031
IWS1	blue	-0.698838	0.000145389
KLHL29	blue	0.698719	0.000145933
CCT2	blue	-0.698513	0.000146875
GNG7	blue	0.698438	0.00014722
ERCC6	blue	-0.698433	0.000147243
ZNF22	blue	-0.697795	0.000150201
LOC101540874	blue	-0.6972	0.000153009
LOC129398764	blue	-0.696752	0.000155151
ATP6V1C1	blue	-0.696415	0.000156779
SMARCD3	blue	0.696355	0.000157072
RAP1A	blue	-0.696205	0.000157804
PLAA	blue	-0.69562	0.000160681
ROCK1	blue	-0.694426	0.000166705
PSMB1	blue	-0.694257	0.000167574
ZNF143	blue	-0.693933	0.000169248
MYO6	blue	-0.693667	0.000170636
PGRMC2	blue	0.691702	0.000181182
GYG1	blue	0.691198	0.000183977
SERINC1	blue	-0.689879	0.000191473
RBL2	blue	-0.688828	0.000197635
MDP1	blue	0.688824	0.00019766
TMT1A	blue	-0.68814	0.00020176
RPUSD1	blue	0.688114	0.000201921
ACMSD	blue	-0.688058	0.000202262
TMEM131	blue	-0.687797	0.000203846
LOC101552590	blue	-0.68736	0.000206532
FBXO38	blue	-0.687286	0.000206987
HSD17B11	blue	-0.686662	0.000210882
FIP1L1	blue	-0.686291	0.000213224
PCNA	blue	-0.685726	0.00021684
HIGD1A	blue	-0.685641	0.000217388
ABCB1	blue	-0.68555	0.00021798
UBA1	blue	-0.685158	0.00022053
LIMD1	blue	-0.684135	0.00022731
ELOVL6	blue	-0.684074	0.000227719
SECISBP2L	blue	-0.683731	0.000230032
FAM120A	blue	-0.682785	0.00023653
SUGT1	blue	-0.682617	0.000237702
ME1	blue	-0.680274	0.000254556
TMEM38B	blue	-0.680226	0.000254911
IK	blue	-0.679861	0.000257632
NOL8	blue	-0.678903	0.000264889
FMR1	blue	-0.678354	0.000269129
TCP1	blue	-0.677775	0.000273667
PKDCC	blue	0.677548	0.000275463
ZNF296	blue	0.677233	0.000277976
PPP1R37	blue	0.67643	0.000284461
ARMC1	blue	-0.676394	0.000284754
SLC2A11	blue	0.676315	0.000285405
LOC101553824	blue	-0.676123	0.000286977
UGP2	blue	-0.675985	0.000288112
DOK7	blue	0.675582	0.000291458
MPHOSPH10	blue	-0.674712	0.00029879
ARSA	blue	0.674692	0.00029896
LOC129406070	blue	0.674342	0.000301949
LOC101555618	blue	-0.673574	0.000308618
PNPLA6	blue	0.673226	0.000311677
NUDT11	blue	-0.673011	0.000313583
SLC28A2	blue	-0.672885	0.000314705
ITM2B	blue	-0.672297	0.000319981
FBXO7	blue	-0.672078	0.000321965
ZMPSTE24	blue	-0.672059	0.000322142
RAB14	blue	-0.671775	0.000324732
TRMT61B	blue	-0.671077	0.000331178
NFKBIE	blue	0.670796	0.000333799
GABPA	blue	-0.670472	0.000336851
CHM	blue	-0.669429	0.000346835
DPP8	blue	-0.66937	0.00034741
XYLT2	blue	0.668463	0.000356311
EIF3M	blue	-0.668293	0.000358
RPRD1B	blue	-0.668262	0.000358309
GABPB2	blue	-0.668158	0.00035935
CTCF	blue	-0.667668	0.000364281
PBLD	blue	-0.667547	0.000365506
PHAX	blue	-0.667395	0.000367055
KIFC2	blue	0.667206	0.000368984
GTPBP8	blue	-0.667011	0.000370975
VPS35	blue	-0.666775	0.000373412
PLEKHG6	blue	-0.666698	0.000374208
PSMC6	blue	-0.666383	0.000377487
C9orf72	blue	-0.66567	0.000384985
PGM1	blue	0.665439	0.000387449
MTSS1	blue	-0.66523	0.000389679
FAM234A	blue	0.664801	0.000394302
MAPKAPK5	blue	-0.663292	0.000410953
TAF4B	blue	-0.662976	0.00041452
ADAM9	blue	-0.662775	0.000416801
ALDH16A1	blue	-0.662498	0.00041996
ALDH1A1	blue	-0.662059	0.000425005
ASPHD2	blue	0.662012	0.000425554
TBC1D16	blue	0.661914	0.000426682
RPL26	blue	-0.661263	0.000434303
SLC25A13	blue	-0.661197	0.000435081
NRTN	blue	0.660612	0.000442031
GBF1	blue	-0.660571	0.00044252
DLAT	blue	-0.659851	0.000451215
DIAPH2	blue	-0.659519	0.000455273
FUBP1	blue	-0.659087	0.000460603
TMED10	blue	-0.658955	0.000462242
SRR	blue	-0.658661	0.00046591
SYNCRIP	blue	-0.658563	0.000467135
SP7	blue	0.658208	0.000471615
B4GALT7	blue	0.658183	0.000471922
LOC101559235	blue	0.657939	0.000475026
NCBP2	blue	-0.657871	0.000475887
ACAD11	blue	-0.657753	0.000477398
GNL2	blue	-0.657733	0.000477657
RCC1L	blue	0.657621	0.00047909
SEC14L1	blue	0.657501	0.000480633
RGN	blue	-0.6566	0.000492338
NAA25	blue	-0.656252	0.000496929
RIF1	blue	-0.656007	0.000500188
LOC101549868	blue	-0.655875	0.000501947
LOC129405529	blue	0.655844	0.000502357
GK	blue	-0.655808	0.000502836
HGFAC	blue	0.655089	0.000512532
LOC129406837	blue	-0.655083	0.000512617
MAP7D1	blue	0.654383	0.000522213
NCL	blue	-0.653588	0.000533309
LMTK2	blue	-0.653192	0.000538906
LOC129402127	blue	0.652944	0.000542432
HMCN2	blue	0.652626	0.000546991
COBL	blue	-0.652607	0.000547264
PNPLA7	blue	0.652502	0.000548783
TMEM87A	blue	-0.652459	0.000549404
AQP9	blue	-0.652238	0.000552595
KRBA1	blue	0.652179	0.00055345
TOP1	blue	-0.651705	0.000560384
DDX21	blue	-0.651529	0.000562973
POLR3D	blue	-0.651278	0.000566688
DNTTIP2	blue	-0.650835	0.000573288
SYBU	blue	0.650742	0.000574687
GLYR1	blue	-0.65039	0.000579986
HNRNPU	blue	-0.650068	0.000584883
COPS7B	blue	0.649771	0.000589423
MAP4K5	blue	-0.649597	0.0005921
LOC129402360	blue	0.649533	0.000593079
PREX2	blue	-0.649314	0.000596465
MTDH	blue	-0.64913	0.000599327
SYAP1	blue	-0.648555	0.000608335
LOC129405071	blue	0.648465	0.000609755
USP47	blue	-0.648444	0.000610084
LMBRD1	blue	-0.648346	0.000611646
NCKAP1	blue	-0.647564	0.000624142
MOB3C	blue	0.647507	0.000625069
CFAP74	blue	0.647366	0.000627333
SLC35B1	blue	-0.647297	0.000628466
RAI14	blue	-0.647153	0.000630793
PDPR	blue	-0.647126	0.000631246
PIGW	blue	-0.646801	0.000636546
C5H6orf89	blue	-0.646673	0.000638646
GPC1	blue	0.646658	0.000638889
SERPINF2	blue	0.646627	0.000639415
USP44	blue	-0.646422	0.000642792
PGK1	blue	-0.64532	0.000661246
SLC22A13	blue	0.645307	0.000661452
SKIC3	blue	-0.644779	0.000670458
NIM1K	blue	-0.644342	0.000678
CEP162	blue	-0.644022	0.000683546
WDR75	blue	-0.643629	0.000690447
CKAP5	blue	-0.643581	0.000691283
LOC101544097	blue	-0.643264	0.00069689
PDZD8	blue	-0.643194	0.000698123
RPE	blue	-0.643081	0.000700135
DNAJC28	blue	-0.643065	0.000700419
ABCC6	blue	0.642774	0.000705618
OPA1	blue	-0.642697	0.000707008
CSNK2A1	blue	-0.642457	0.000711322
PKNOX2	blue	0.642353	0.000713206
SH3BP4	blue	0.642339	0.000713454
FAM135A	blue	-0.642268	0.000714731
NACA	blue	-0.642198	0.000716008
DMWD	blue	0.642161	0.000716688
BROX	blue	-0.641781	0.000723609
TSR2	blue	-0.641737	0.000724415
CCT3	blue	-0.641638	0.000726228
LY75	blue	0.641315	0.000732191
BAG5	blue	-0.641237	0.000733644
SYNRG	blue	-0.641215	0.000734039
RNF4	blue	-0.641138	0.000735472
LOC101541302	blue	0.641003	0.000737988
TENT2	blue	-0.640684	0.000743952
NUDCD1	blue	-0.640615	0.000745253
TRPM2	blue	0.640408	0.00074914
HNRNPK	blue	-0.639839	0.00075994
NECTIN2	blue	0.639726	0.000762111
PNP	blue	-0.639238	0.000771497
SPCS2	blue	-0.639228	0.000771695
KPNB1	blue	-0.639084	0.000774496
AGXT2	blue	-0.638983	0.000776447
PPP4R3B	blue	-0.63883	0.000779444
DENND4A	blue	-0.638413	0.000787615
FGD6	blue	-0.638099	0.00079382
ADD1	blue	0.637928	0.000797219
DNPH1	blue	0.637806	0.000799657
PLEKHF2	blue	-0.63774	0.000800978
MZT2B	blue	0.637111	0.000813643
ITGA1	blue	-0.637038	0.000815116
KRIT1	blue	-0.635556	0.000845673
PELI2	blue	-0.635326	0.000850506
NFE2L3	blue	0.635152	0.000854184
RAB27B	blue	-0.634768	0.000862324
CRNKL1	blue	-0.634653	0.000864778
DSTN	blue	0.634512	0.000867801
PSMB4	blue	-0.63442	0.000869768
GOLPH3	blue	-0.634248	0.000873477
TCF7L1	blue	0.634225	0.000873953
FXR1	blue	-0.633849	0.000882091
TFR2	blue	0.63381	0.000882942
SLC23A1	blue	-0.633349	0.000893029
N4BP2L2	blue	-0.632736	0.000906563
TMEM198	blue	0.632366	0.00091483
EIF4A1	blue	-0.63213	0.000920127
LOC101549253	blue	-0.631754	0.000928642
MIA3	blue	-0.631328	0.000938354
CSTF2	blue	-0.631196	0.000941383
FAM13A	blue	-0.630754	0.000951579
TRMT10A	blue	-0.630416	0.000959456
VAMP7	blue	-0.630191	0.000964722
ZNF518A	blue	-0.630165	0.000965317
LOC101539216	blue	-0.629847	0.000972823
ARPC2	blue	-0.629534	0.000980243
DPYD	blue	-0.629527	0.000980407
MAB21L3	blue	0.629225	0.000987595
CHORDC1	blue	-0.628855	0.000996497
ELL2	blue	-0.628722	0.000999702
SF3A3	blue	-0.628361	0.00100848
TLR3	blue	-0.628253	0.0010111
WDR45B	blue	-0.628186	0.00101276
FMO5	blue	-0.627939	0.00101881
TMEM179	blue	0.627712	0.0010244
ITSN2	blue	-0.627063	0.00104056
ETF1	blue	-0.627003	0.00104204
LIPE	blue	0.626999	0.00104214
UBLCP1	blue	-0.626918	0.00104419
METAP2	blue	-0.626874	0.00104528
NEMF	blue	-0.62684	0.00104614
ZNF207	blue	-0.626265	0.0010607
LLPH	blue	-0.625992	0.00106766
LAMA5	blue	0.625739	0.00107414
DAPK3	blue	0.625458	0.00108141
LGR4	blue	-0.625101	0.00109067
PPP2CA	blue	-0.624738	0.00110018
TXNL1	blue	-0.624618	0.00110333
PPIF	blue	0.624442	0.00110798
TBC1D32	blue	-0.62428	0.00111227
CD84	blue	0.623278	0.00113911
USF2	blue	0.623188	0.00114154
CMPK1	blue	-0.622887	0.00114973
TNRC18	blue	0.622216	0.00116816
SNAP23	blue	-0.622093	0.00117156
LOC129403501	blue	0.622012	0.0011738
AZIN2	blue	0.621989	0.00117445
AGMO	blue	-0.621916	0.00117648
GPD2	blue	-0.621782	0.00118023
CEBPZ	blue	-0.621396	0.00119103
PIGG	blue	-0.621241	0.00119538
KLC2	blue	0.621241	0.00119538
LAS1L	blue	-0.620282	0.00122271
CSRP2	blue	-0.620172	0.00122585
PRR7	blue	0.620032	0.00122991
CCPG1	blue	-0.619988	0.00123117
MCM9	blue	-0.619813	0.00123626
CNOT10	blue	-0.619405	0.00124815
MAGEH1	blue	-0.619278	0.00125186
ENHO	blue	0.619151	0.0012556
TOMM70	blue	-0.61912	0.00125651
PBK	blue	-0.619062	0.00125821
POLH	blue	-0.619013	0.00125967
LOC129402076	blue	0.618956	0.00126134
HBS1L	blue	-0.618883	0.00126351
CCT8	blue	-0.618765	0.001267
AZGP1	blue	0.618601	0.00127188
ATM	blue	-0.618452	0.00127631
SH3GLB2	blue	0.618397	0.00127794
MTREX	blue	-0.618372	0.00127871
HERC4	blue	-0.617806	0.00129569
WAPL	blue	-0.617473	0.00130579
ARHGAP26	blue	-0.617332	0.0013101
SHFL	blue	0.616372	0.00133965
UBR1	blue	-0.616141	0.00134687
TBC1D23	blue	-0.615923	0.00135369
CTC1	blue	-0.615904	0.00135428
ASAH1	blue	-0.615279	0.00137402
LOC129400672	blue	-0.6147	0.00139255
PSMA2	blue	-0.614504	0.00139884
SUPT16H	blue	-0.614183	0.00140926
UBQLN1	blue	-0.613521	0.00143087
MAGT1	blue	-0.6135	0.00143158
YLPM1	blue	-0.613481	0.0014322
SACS	blue	-0.613122	0.00144406
ACOT12	blue	-0.61264	0.00146012
GRB14	blue	-0.61253	0.00146382
MAOA	blue	-0.612482	0.00146541
STT3B	blue	-0.612238	0.00147362
POLR2B	blue	-0.612109	0.001478
DNAJA2	blue	-0.612013	0.00148125
CALU	blue	-0.611741	0.00149048
HELB	blue	-0.611736	0.00149066
RAB11FIP2	blue	-0.611483	0.00149929
TBK1	blue	-0.611357	0.00150362
COG2	blue	-0.611327	0.00150464
ARHGAP23	blue	0.610949	0.00151768
NSUN2	blue	0.610928	0.00151841
PRPF8	blue	-0.610204	0.00154363
EPAS1	blue	-0.609796	0.00155801
RBM41	blue	-0.60944	0.00157065
ACTR10	blue	-0.60939	0.00157243
CCT4	blue	-0.609136	0.00158154
ZNF579	blue	0.609034	0.00158519
PGGT1B	blue	-0.608678	0.00159803
CTSA	blue	0.608333	0.00161055
TNFSF13	blue	0.608171	0.00161646
CCT6A	blue	-0.608021	0.00162194
ARFGEF1	blue	-0.607951	0.00162449
YKT6	blue	0.60776	0.0016315
LOC101545288	blue	0.607741	0.0016322
AQR	blue	-0.607665	0.00163502
GPSM1	blue	0.607537	0.00163973
ENTPD5	blue	-0.607142	0.00165441
HRAS	blue	0.606552	0.0016765
ATP11C	blue	-0.60642	0.00168149
POMP	blue	-0.606258	0.00168762
DMTF1	blue	-0.606247	0.00168804
STMP1	blue	0.606007	0.00169712
ZMYM1	blue	-0.605434	0.00171909
FRS3	blue	0.604896	0.00173987
CAND1	blue	-0.604855	0.00174149
HPRT1	blue	-0.60481	0.00174322
DGAT2	blue	0.604739	0.00174599
BET1	blue	-0.604544	0.00175364
LOC101537180	blue	0.604506	0.00175512
RGL2	blue	0.604374	0.00176027
TMEM33	blue	-0.604149	0.00176914
MPV17L	blue	-0.603716	0.00178629
TECPR1	blue	0.603311	0.00180244
GPR89A	blue	-0.603032	0.00181368
PLXNB3	blue	0.602682	0.00182781
VCP	blue	-0.602641	0.00182949
LZTS2	blue	0.602633	0.00182982
KXD1	blue	0.602537	0.00183371
UBR3	blue	-0.60146	0.00187795
HSPA9	blue	-0.601262	0.0018862
SRPK3	blue	0.601031	0.00189582
GPHN	blue	-0.601005	0.00189693
MAN2A2	blue	0.600807	0.00190524
EPS15	blue	-0.600623	0.00191297
P4HA2	blue	-0.600605	0.00191372
TMTC3	blue	-0.600137	0.00193358
PSMD1	blue	-0.599837	0.00194637
USF1	blue	0.599625	0.00195546
ADCY10	blue	0.599194	0.00197404
CLIP1	blue	-0.599107	0.00197779
CCNDBP1	blue	-0.599045	0.00198051
LOC129404448	blue	-0.599029	0.00198118
MTA1	blue	0.598971	0.00198373
TRAPPC8	blue	-0.598963	0.00198405
DHX40	blue	-0.598785	0.00199182
RARB	blue	-0.59868	0.00199641
KCNRG	blue	-0.598465	0.00200583
LOC129399964	blue	0.598327	0.00201189
MATR3	blue	-0.598233	0.00201601
GCNT4	blue	-0.598054	0.00202393
UFL1	blue	-0.597885	0.00203145
PTCD1	blue	-0.597849	0.00203303
EIF4E3	blue	-0.597819	0.00203435
MTX3	blue	-0.5973	0.00205753
TNFRSF18	blue	0.597102	0.00206642
XPNPEP3	blue	-0.596683	0.00208537
BBLN	blue	0.596464	0.00209532
STAG2	blue	-0.596402	0.00209814
TRABD	blue	0.596393	0.00209855
LMNB1	blue	-0.596338	0.0021011
ANKS4B	blue	-0.5963	0.00210279
SUMF1	blue	0.596146	0.00210986
NFYB	blue	-0.596093	0.00211227
C6H4orf3	blue	-0.596042	0.00211463
EIF4G2	blue	-0.595965	0.00211816
TUBGCP5	blue	-0.595935	0.00211955
LOC101540553	blue	-0.595818	0.00212492
SLC35B2	blue	0.595647	0.00213284
TMEM47	blue	-0.595185	0.00215432
CHD8	blue	-0.595069	0.00215971
ENPP2	blue	-0.595031	0.00216152
HNRNPA3	blue	-0.594847	0.0021701
F7	blue	0.594807	0.002172
CDC42EP4	blue	0.59475	0.00217468
TMEM41B	blue	-0.594592	0.00218211
ZMYND11	blue	-0.594503	0.00218633
LOC129405138	blue	-0.594024	0.00220906
PSMD12	blue	-0.593865	0.00221663
CDH11	blue	-0.593154	0.00225087
TXLNG	blue	-0.592813	0.00226743
CDC42BPG	blue	0.592717	0.00227208
MKNK2	blue	0.592635	0.00227608
PSMG4	blue	0.592523	0.00228158
NES	blue	0.592333	0.00229092
EIF4E	blue	-0.592255	0.00229474
PDIA3	blue	-0.592168	0.00229902
TMEM106B	blue	-0.591797	0.00231739
EFR3A	blue	-0.591167	0.00234884
PALB2	blue	-0.590942	0.00236018
UEVLD	blue	-0.590941	0.00236022
APLF	blue	-0.590932	0.00236068
PRMT5	blue	-0.590715	0.00237163
STAU1	blue	-0.590578	0.00237857
LRFN4	blue	0.590453	0.00238492
ATP8B1	blue	-0.590349	0.00239024
IFNGR2	blue	0.590076	0.00240416
PCYT1A	blue	-0.590028	0.00240661
POGLUT3	blue	-0.589765	0.00242012
PRKCD	blue	0.58944	0.00243692
IL17REL	blue	0.589161	0.00245142
APH1B	blue	-0.589057	0.00245687
LOC101547440	blue	0.588992	0.00246025
PIK3R1	blue	-0.588784	0.00247114
LOC129404302	blue	0.588365	0.0024932
RCOR1	blue	-0.588222	0.00250073
TMEM209	blue	-0.587734	0.00252668
TOM1L1	blue	-0.587428	0.00254308
UAP1L1	blue	0.586587	0.00258859
ABCB11	blue	-0.586296	0.00260454
ERC1	blue	-0.586121	0.00261415
TBL1XR1	blue	-0.586095	0.00261558
RAD21	blue	-0.584409	0.00270976
C1H9orf85	blue	-0.583862	0.00274089
SLC38A10	blue	0.583614	0.0027551
MIB2	blue	0.583546	0.00275904
TWNK	blue	-0.583516	0.00276078
TMED2	blue	-0.583503	0.00276154
PTPRF	blue	0.583421	0.00276622
COPS3	blue	-0.583345	0.00277064
VTA1	blue	-0.583235	0.00277699
ADAMTSL5	blue	0.583086	0.00278566
RECQL5	blue	0.582744	0.00280556
LTBR	blue	0.582574	0.00281547
MBD3	blue	0.58249	0.0028204
NAA35	blue	-0.582438	0.00282346
EVA1B	blue	0.581814	0.00286027
RNF139	blue	-0.581727	0.00286548
LTN1	blue	-0.581567	0.00287501
ATP1A1	blue	-0.581432	0.00288306
TARS1	blue	-0.581294	0.00289129
GRWD1	blue	-0.581269	0.00289281
ATF7IP	blue	-0.581239	0.00289457
SHF	blue	0.581089	0.00290362
LOC101551431	blue	-0.580905	0.00291471
SLC37A1	blue	0.580795	0.00292133
PTAR1	blue	-0.580585	0.00293401
TBC1D8B	blue	-0.580358	0.00294781
AP2B1	blue	-0.579956	0.00297238
TMEM68	blue	-0.579932	0.00297384
YWHAB	blue	-0.579828	0.00298023
ZAN	blue	0.579407	0.00300625
ABCE1	blue	-0.579275	0.00301439
CDKL2	blue	0.579054	0.00302815
JMJD1C	blue	-0.579015	0.00303056
JAK2	blue	-0.578841	0.00304146
PRPF40A	blue	-0.578331	0.00307345
SEPTIN2	blue	-0.578269	0.00307736
TAX1BP1	blue	-0.578259	0.00307805
VPS50	blue	-0.57795	0.00309757
SEC24C	blue	-0.577709	0.00311294
EIF3D	blue	-0.577541	0.00312363
THSD8	blue	0.577508	0.00312574
TSPAN17	blue	0.577304	0.00313884
ABI1	blue	-0.576866	0.00316708
CCDC47	blue	-0.576557	0.0031871
UFD1	blue	-0.576247	0.00320735
STRAP	blue	-0.576197	0.00321064
TTC33	blue	-0.576006	0.00322311
SLC16A13	blue	0.575502	0.00325639
DEDD	blue	0.5755	0.00325652
URB2	blue	-0.575158	0.00327924
CPSF3	blue	-0.575096	0.00328338
EFL1	blue	-0.575049	0.00328652
PLPP6	blue	-0.574893	0.00329691
KIAA0930	blue	0.574538	0.00332078
SLC8A1	blue	0.57406	0.00335308
YIPF2	blue	0.573994	0.00335761
CEP20	blue	-0.573828	0.00336888
SLC27A5	blue	-0.573558	0.00338733
LAX1	blue	-0.573129	0.0034168
ADAMTSL4	blue	0.573108	0.00341825
ERO1B	blue	-0.57305	0.00342226
MIA2	blue	-0.573036	0.00342327
PUS7L	blue	-0.573012	0.00342492
CLCN7	blue	0.572684	0.00344762
ZMAT3	blue	-0.572212	0.00348059
DOK4	blue	0.571777	0.00351117
CIZ1	blue	0.571674	0.0035185
FBXO24	blue	0.571452	0.00353419
ARMC9	blue	0.571365	0.00354039
RNF170	blue	-0.571307	0.00354449
TMEM88B	blue	0.5712	0.0035521
ARNT2	blue	0.570755	0.003584
IDUA	blue	0.570525	0.00360054
EAPP	blue	-0.57009	0.00363203
CLTC	blue	-0.569922	0.00364425
PTOV1	blue	0.569874	0.00364778
MAST3	blue	0.569777	0.00365481
C6H5orf24	blue	-0.56977	0.00365537
INSIG2	blue	-0.569441	0.00367941
TNK2	blue	0.569191	0.00369782
AHCTF1	blue	-0.569175	0.00369903
FBXL3	blue	-0.56871	0.00373345
LGALS3BP	blue	0.568673	0.00373624
PDCD10	blue	-0.568363	0.00375935
BRMS1L	blue	-0.568279	0.00376559
ATP6V1D	blue	-0.568192	0.00377215
NONO	blue	-0.567201	0.0038471
METAP1	blue	-0.567031	0.00386008
NAT14	blue	0.566719	0.00388403
TNR	blue	0.566679	0.00388711
CHRD	blue	0.56652	0.00389937
XPO4	blue	-0.566492	0.00390146
AIMP1	blue	-0.566463	0.00390375
LOC101553886	blue	-0.566436	0.00390584
BMS1	blue	-0.566327	0.00391425
EIF2B1	blue	-0.565857	0.00395074
ZNF346	blue	0.56582	0.00395365
AP1G1	blue	-0.565732	0.00396053
ABHD8	blue	0.565546	0.00397506
PLD1	blue	-0.565295	0.00399478
RBM26	blue	-0.565277	0.0039962
CASD1	blue	-0.565155	0.00400585
CAPS	blue	0.564699	0.00404196
PXYLP1	blue	0.564661	0.00404499
HSP90B1	blue	-0.564649	0.00404591
LOC101559037	blue	-0.564545	0.00405424
DHX38	blue	-0.564446	0.00406209
CGRRF1	blue	-0.564431	0.00406331
CUL5	blue	-0.564319	0.00407229
TRIM2	blue	-0.564248	0.00407791
UTP18	blue	-0.563874	0.00410801
CMTM4	blue	-0.563869	0.00410838
FAM83F	blue	0.563626	0.004128
TP53I3	blue	0.563617	0.00412873
RPF1	blue	-0.562859	0.00419052
INSYN2A	blue	0.562836	0.00419241
ADSS2	blue	-0.562468	0.00422265
CLPX	blue	-0.562276	0.00423854
PICALM	blue	-0.562234	0.00424203
FYB1	blue	-0.562119	0.00425156
NDC80	blue	-0.562112	0.0042521
KLHDC9	blue	0.562095	0.00425353
PMEPA1	blue	0.561982	0.00426287
LOC101539786	blue	0.561782	0.00427955
RAB23	blue	-0.561561	0.00429802
PHACTR4	blue	-0.561432	0.00430885
CCT7	blue	-0.561279	0.00432174
LOC129398789	blue	0.561177	0.00433031
PURA	blue	-0.56072	0.00436894
ANKRD28	blue	-0.560123	0.00441988
ARIH1	blue	-0.560041	0.00442688
LOC101544915	blue	-0.55998	0.00443212
TNKS	blue	-0.559936	0.00443596
ATP6V0A2	blue	-0.559912	0.00443799
ZMAT2	blue	-0.559882	0.00444054
PSMD7	blue	-0.559681	0.00445787
LOC101547604	blue	-0.559592	0.0044656
CDKN2C	blue	-0.559533	0.00447068
PAK2	blue	-0.559481	0.00447522
BRIX1	blue	-0.559343	0.00448712
VHL	blue	0.558777	0.00453658
ZYG11B	blue	-0.558512	0.00455982
ARHGEF11	blue	0.558501	0.00456077
LDOC1	blue	0.558438	0.00456635
DPM1	blue	-0.557944	0.00461004
PUM3	blue	-0.557707	0.0046311
IPO11	blue	-0.557527	0.00464717
TM9SF3	blue	-0.557391	0.00465937
CHD9	blue	-0.557335	0.00466437
LOC129405053	blue	-0.55728	0.00466928
CFAP300	blue	-0.557219	0.00467477
FAM168B	blue	-0.557156	0.00468049
AMDHD1	blue	-0.556615	0.00472933
SLC2A2	blue	-0.55638	0.00475071
TYMS	blue	-0.556219	0.00476542
DNAJB11	blue	-0.556158	0.00477099
TSC22D4	blue	0.556052	0.00478068
FNDC10	blue	0.555722	0.00481101
ORC2	blue	-0.555711	0.00481199
SMIM26	blue	-0.555588	0.00482334
PSMC2	blue	-0.555542	0.00482758
ZMIZ2	blue	0.555256	0.004854
CTSB	blue	0.555006	0.0048773
CUL3	blue	-0.554865	0.00489045
EXOC3L4	blue	0.554757	0.00490055
SPN	blue	-0.554662	0.00490943
CTXND1	blue	0.554318	0.00494171
CERK	blue	0.554201	0.00495269
PSMA1	blue	-0.554201	0.00495273
ERO1A	blue	-0.554008	0.00497099
AGT	blue	-0.55377	0.00499355
ARPC5L	blue	0.553687	0.00500136
CAPN7	blue	-0.553628	0.00500706
PPP1R14B	blue	0.553532	0.0050162
FARSA	blue	-0.553442	0.00502479
E2F3	blue	0.553356	0.00503293
LOC129406471	blue	0.55328	0.00504026
GPT2	blue	-0.5532	0.00504789
SEC24A	blue	-0.553177	0.00505014
WHRN	blue	0.553076	0.00505977
RIMKLB	blue	-0.552889	0.00507778
DRAM2	blue	-0.5526	0.0051057
TTC19	blue	-0.551891	0.00517472
RBBP9	blue	-0.551885	0.00517531
PIGN	blue	-0.551831	0.00518062
MARCHF5	blue	-0.551521	0.00521105
ZBTB47	blue	0.551065	0.00525605
USP22	blue	-0.550831	0.00527938
HSPA14	blue	-0.550659	0.00529649
MED6	blue	-0.550599	0.00530245
RNF141	blue	-0.550507	0.0053117
AMOT	blue	-0.550267	0.0053357
PGS1	blue	0.55016	0.00534651
GTF2B	blue	-0.550134	0.00534908
PSMA5	blue	-0.550118	0.00535069
DCAF12	blue	-0.55003	0.00535957
CREB1	blue	-0.550008	0.00536179
PPTC7	blue	-0.549081	0.00545594
NUDT12	blue	-0.549001	0.00546413
LARP4	blue	-0.54879	0.00548575
HOMER3	blue	0.548568	0.00550861
SAR1B	blue	-0.548377	0.00552832
GTF3C3	blue	-0.548341	0.00553212
KATNIP	blue	0.548325	0.00553375
HINT3	blue	-0.548313	0.00553497
FAXC	blue	0.54808	0.00555913
SEL1L	blue	-0.547996	0.00556786
SMC5	blue	-0.547977	0.00556989
KRAS	blue	-0.547407	0.0056295
ERH	blue	-0.547256	0.00564538
NCKIPSD	blue	0.54709	0.00566287
RIPK4	blue	0.546817	0.00569173
SMNDC1	blue	-0.546136	0.00576429
LOC101539972	blue	0.545697	0.00581147
KCNN2	blue	0.545682	0.00581311
ATPAF1	blue	-0.545262	0.00585858
RPL21	blue	-0.544958	0.0058917
TMEM135	blue	-0.544937	0.00589399
HECTD1	blue	-0.544834	0.00590521
EIF2S1	blue	-0.544773	0.00591194
YWHAE	blue	-0.544745	0.00591493
GOLGA7	blue	-0.544543	0.00593713
GSDMD	blue	0.5443	0.00596386
LMBRD2	blue	-0.544107	0.00598517
YTHDF3	blue	-0.544071	0.0059892
SLC27A2	blue	-0.543879	0.0060104
COG5	blue	-0.543845	0.00601415
TCF12	blue	-0.543756	0.00602412
TFAM	blue	-0.54342	0.00606151
RAN	blue	-0.543278	0.00607745
NUP133	blue	-0.543071	0.00610062
NIPA1	blue	-0.542957	0.00611342
CLINT1	blue	-0.542887	0.00612139
NCOA2	blue	-0.542507	0.00616422
ANXA1	blue	-0.542506	0.00616441
HAUS6	blue	-0.542456	0.00617
ZBTB41	blue	-0.542437	0.00617221
YRDC	blue	-0.542024	0.00621922
TMED6	blue	-0.541884	0.00623519
ENOX2	blue	-0.541809	0.00624383
MED1	blue	-0.541755	0.00624997
MPZL2	blue	-0.541308	0.00630136
SARM1	blue	0.541239	0.00630934
EFHC1	blue	0.541216	0.00631201
CTNNB1	blue	-0.540308	0.00641777
SUZ12	blue	-0.539876	0.00646851
PIN4	blue	-0.539872	0.00646905
DPP4	blue	-0.53952	0.00651066
BZW1	blue	-0.538786	0.00659816
DNAJC16	blue	-0.538668	0.00661232
SLC30A7	blue	-0.537853	0.00671089
BHMT	blue	-0.537615	0.00673997
VPS54	blue	-0.5375	0.00675399
AP4E1	blue	-0.536933	0.00682368
GTF2A1	blue	-0.536884	0.00682973
GINM1	blue	-0.536442	0.00688446
NFE2	blue	-0.536412	0.00688815
ITFG1	blue	-0.536315	0.00690026
G6PC1	blue	-0.536282	0.00690432
PRKAR2A	blue	-0.536062	0.00693185
MMGT1	blue	-0.535835	0.00696025
ZFYVE28	blue	0.53561	0.00698849
COPS2	blue	-0.535605	0.00698913
NUTF2	blue	-0.535309	0.00702646
LIMD2	blue	0.535296	0.00702816
SARNP	blue	-0.535279	0.00703027
LOC101538361	blue	-0.535088	0.00705447
ACTL6A	blue	-0.534905	0.00707772
DLG1	blue	-0.534743	0.00709835
DHX29	blue	-0.53465	0.00711022
XIAP	blue	-0.534349	0.00714874
GCGR	blue	0.534344	0.00714931
CHP1	blue	-0.534276	0.00715801
ZNF8	blue	-0.534118	0.00717832
IFRD2	blue	0.533883	0.00720863
CLOCK	blue	-0.533377	0.00727422
LOC129403654	blue	-0.533376	0.00727446
MFN1	blue	-0.533302	0.00728401
ACO2	blue	0.533045	0.00731762
GPR52	blue	-0.532734	0.00735839
RPAP3	blue	-0.532272	0.0074193
AHCYL1	blue	-0.531974	0.00745872
ZC3H18	blue	-0.531854	0.00747475
CCDC43	blue	-0.531772	0.00748565
AIF1L	blue	0.531476	0.00752512
VSIG10	blue	0.531305	0.00754808
FLT4	blue	0.530532	0.00765238
SLC39A9	blue	-0.530331	0.00767968
LOC101556738	blue	0.530311	0.0076824
PAFAH1B1	blue	-0.530178	0.00770066
SLC17A5	blue	-0.529861	0.00774398
SPEF1	blue	0.528835	0.00788561
ACTR3	blue	-0.528697	0.0079049
EFCAB14	blue	-0.528515	0.00793027
FAM172A	blue	-0.528503	0.00793202
PSD4	blue	0.528353	0.00795297
CWC22	blue	-0.528333	0.00795578
GNG5	blue	-0.528213	0.00797267
HEATR1	blue	-0.528118	0.00798595
SELENOI	blue	-0.527899	0.00801682
IST1	blue	-0.527559	0.00806488
ADAT1	blue	0.527497	0.00807374
KCTD20	blue	-0.527262	0.00810716
PSMC5	blue	-0.52715	0.00812314
IGBP1	blue	-0.527127	0.00812638
PPM1B	blue	-0.526948	0.00815202
SEC31B	blue	0.526501	0.00821613
SPTLC1	blue	-0.526356	0.00823696
USP46	blue	-0.526356	0.00823703
MAP1LC3B	blue	0.526307	0.00824416
TMEM170B	blue	-0.526067	0.00827874
HSPA12B	blue	0.52604	0.00828272
DNAJC10	blue	-0.525679	0.00833519
CC2D1B	blue	0.525667	0.00833691
HNRNPLL	blue	-0.52566	0.008338
URM1	blue	0.525394	0.00837679
TMPRSS6	blue	0.525294	0.0083914
TMED7	blue	-0.525232	0.00840059
OSGIN1	blue	0.525097	0.00842032
PAH	blue	-0.524969	0.00843921
CCDC73	blue	-0.524806	0.00846321
ZDHHC17	blue	-0.524764	0.00846948
PSME4	blue	-0.52455	0.00850105
FNDC3A	blue	-0.523945	0.00859106
HSPA13	blue	-0.523883	0.00860037
SRSF1	blue	-0.523796	0.00861338
SCAMP2	blue	-0.523601	0.00864265
GAL3ST1	blue	0.52346	0.00866382
DCK	blue	-0.523184	0.00870548
AKAP10	blue	-0.523166	0.00870819
NIFK	blue	-0.52296	0.00873937
WBP11	blue	-0.522516	0.00880691
SOCS4	blue	-0.522196	0.00885587
HTRA4	blue	-0.521765	0.0089221
CEP131	blue	0.52164	0.00894134
NDUFS1	blue	-0.521557	0.00895423
RPF2	blue	-0.521392	0.00897967
ANKRD34A	blue	0.520889	0.00905797
SCNN1D	blue	0.520833	0.0090668
LONP2	blue	-0.52076	0.0090781
BBS7	blue	-0.520726	0.00908354
ESD	blue	-0.520665	0.0090931
SLC39A11	blue	0.520514	0.00911668
MOB1B	blue	-0.52023	0.00916144
KDM1A	blue	-0.51969	0.0092469
LRSAM1	blue	0.519663	0.00925113
SORD	blue	-0.519648	0.00925349
TRAM1	blue	-0.51963	0.00925632
CLDN12	blue	-0.519607	0.00926003
DAZAP2	blue	-0.519388	0.00929493
CRIPT	blue	-0.519233	0.00931961
SETD6	blue	0.519203	0.00932445
CCNC	blue	-0.519103	0.00934047
LOC101538192	blue	-0.518727	0.00940081
CD19	blue	-0.518589	0.0094231
SDK1	blue	0.518468	0.00944273
MCFD2	blue	-0.518451	0.00944536
MYLK	blue	-0.518117	0.00949957
WDR70	blue	-0.517713	0.00956528
UHMK1	blue	0.517224	0.00964559
TJP3	blue	0.517167	0.0096549
VPS26A	blue	-0.516875	0.00970301
CD2AP	blue	-0.516842	0.00970861
TNFRSF13B	blue	-0.516592	0.00974995
STEEP1	blue	-0.516417	0.00977896
MRPL52	blue	0.51614	0.00982517
CNEP1R1	blue	-0.516101	0.00983165
TMEM168	blue	-0.515311	0.00996445
SS18L2	blue	0.514826	0.0100467
STX17	blue	-0.514774	0.0100556
SCFD1	blue	-0.51476	0.0100579
ARF3	blue	0.514683	0.010071
PPWD1	blue	-0.514279	0.0101402
MCM4	blue	-0.514159	0.0101607
RPL7L1	blue	-0.514145	0.0101632
NMT1	blue	-0.513986	0.0101904
IER3IP1	blue	-0.513971	0.010193
TRMT5	blue	-0.51383	0.0102173
PSMB2	blue	-0.513414	0.0102893
RIN3	blue	0.512931	0.0103735
CSGALNACT2	blue	-0.512794	0.0103975
SIRPA	blue	0.512297	0.0104847
WNK1	blue	-0.51217	0.0105072
YJEFN3	blue	0.511988	0.0105393
TMEM50B	blue	-0.511659	0.0105977
CYREN	blue	0.511652	0.0105988
GHITM	blue	-0.511354	0.010652
CYSRT1	blue	0.511243	0.0106719
DYNC1LI2	blue	-0.51108	0.010701
IARS1	blue	-0.510948	0.0107248
SMG7	blue	0.510143	0.0108701
LOC101542879	blue	-0.510004	0.0108953
NCOA7	blue	-0.509956	0.0109041
PIGA	blue	-0.5099	0.0109144
SCRN3	blue	-0.509862	0.0109211
MANBAL	blue	0.509823	0.0109284
STXBP3	blue	-0.509688	0.0109531
MINDY2	blue	-0.509653	0.0109593
CSDE1	blue	-0.50956	0.0109764
LOC101557255	blue	-0.509481	0.0109908
LOC101541634	blue	-0.509336	0.0110174
SERPING1	blue	0.509209	0.0110408
NBEAL1	blue	-0.509163	0.0110493
RPS6KB2	blue	0.508994	0.0110805
ARHGEF12	blue	-0.508689	0.0111367
LOC129401981	blue	0.50867	0.0111402
IPO7	blue	-0.508632	0.0111474
COPB1	blue	-0.508326	0.0112043
CC2D1A	blue	0.508248	0.0112187
MAPK1	blue	-0.508104	0.0112456
SEC62	blue	-0.508063	0.0112533
TMEM185A	blue	-0.508012	0.0112628
SLC4A1AP	blue	-0.507932	0.0112778
KCTD2	blue	0.507805	0.0113015
TSEN54	blue	0.507518	0.0113554
RRS1	blue	-0.507375	0.0113824
LOC101547358	blue	-0.507192	0.0114169
PSMD9	blue	0.507055	0.0114429
RAB21	blue	-0.507053	0.0114432
UBL3	blue	-0.507026	0.0114484
LOC129401185	blue	0.506883	0.0114756
STX10	blue	0.506768	0.0114974
PPP6C	blue	-0.506584	0.0115325
CDC5L	blue	-0.506405	0.0115666
NRP2	blue	-0.505816	0.0116797
YIPF6	blue	-0.505566	0.0117278
STAMBPL1	blue	-0.505454	0.0117497
SH3BGRL3	blue	0.505357	0.0117683
KLHL2	blue	-0.505288	0.0117817
LOC101550326	blue	-0.504882	0.0118607
PWP1	blue	-0.504667	0.0119028
PSMD13	blue	-0.504584	0.011919
TRIP4	blue	-0.504411	0.0119529
SLC10A1	blue	-0.504334	0.0119682
TTC8	blue	0.504174	0.0119996
TEAD2	blue	0.503853	0.0120629
ASCC3	blue	-0.503842	0.012065
TFDP1	blue	0.50383	0.0120674
H6PD	blue	0.503819	0.0120696
NAA15	blue	-0.503651	0.0121029
MARCHF6	blue	-0.503623	0.0121086
PREPL	blue	0.503613	0.0121104
CLN5	blue	-0.503498	0.0121333
MON2	blue	-0.503433	0.0121462
MTFR1	blue	-0.503272	0.0121784
RABGGTB	blue	-0.503258	0.0121812
ACAA2	blue	0.503207	0.0121914
UMPS	blue	-0.503145	0.0122037
ACO1	blue	-0.502507	0.0123318
MIGA2	blue	0.502403	0.0123526
R3HCC1	blue	0.502046	0.0124248
SIRT2	blue	0.501875	0.0124595
AMPD2	blue	0.501662	0.0125029
DEPDC7	blue	-0.501485	0.012539
SYT9	blue	0.501393	0.0125578
SLC52A2	blue	0.501272	0.0125827
SRP72	blue	-0.500871	0.0126649
MAP2K4	blue	-0.500725	0.0126951
FOXRED2	blue	0.500643	0.012712
UFM1	blue	-0.500507	0.0127402
B3GAT3	blue	0.500341	0.0127745
AFG2A	blue	0.500326	0.0127776
RPN2	blue	-0.500169	0.0128101
ATG13	blue	-0.500055	0.0128341
DBT	blue	-0.500048	0.0128354
SIN3B	blue	0.499779	0.0128915
MTHFD1	blue	-0.499702	0.0129077
LOC101548651	blue	-0.499639	0.0129209
RBP1	blue	0.499552	0.0129391
HOOK1	blue	-0.499551	0.0129392
GNL3	blue	-0.499435	0.0129637
RBBP5	blue	-0.499288	0.0129944
NECTIN3	blue	-0.498928	0.0130703
GPN1	blue	-0.498526	0.0131557
ATP13A3	blue	-0.498478	0.0131658
SLC29A1	blue	0.498423	0.0131775
GAA	blue	0.49842	0.0131781
CCL20	blue	-0.498066	0.0132536
ZNF782	blue	-0.498064	0.0132541
AURKB	blue	-0.497992	0.0132694
PYM1	blue	0.497983	0.0132714
TMEM184B	blue	0.497824	0.0133054
RNF217	blue	-0.497744	0.0133225
APPL1	blue	-0.49748	0.0133794
RPS24	blue	-0.497246	0.0134299
ARMC8	blue	-0.497214	0.0134367
RNASET2	blue	0.497113	0.0134587
ZNF184	blue	0.496857	0.0135142
CXCR5	blue	-0.496827	0.0135208
AP1G2	blue	0.496614	0.0135671
GET1	blue	0.49659	0.0135723
AKAP1	blue	-0.496488	0.0135946
KPNA3	blue	-0.496465	0.0135996
RTL5	blue	0.496243	0.0136481
LOC101546491	blue	0.496055	0.0136894
RBMX	blue	-0.495727	0.0137614
NHLRC2	blue	-0.495726	0.0137618
MOB4	blue	-0.495682	0.0137714
LOC129404288	blue	-0.495539	0.013803
MOB3A	blue	0.495454	0.0138219
HGS	blue	0.495225	0.0138726
PRR13	blue	0.495154	0.0138884
VMP1	blue	-0.495	0.0139226
MORN1	blue	0.494828	0.0139609
NSFL1C	blue	-0.494067	0.0141316
ATP2C1	blue	-0.494016	0.0141429
HNRNPUL2	blue	-0.493502	0.0142594
C6H11orf58	blue	-0.493223	0.0143228
MGRN1	blue	0.492737	0.0144338
DEAF1	blue	0.492565	0.0144732
BMT2	blue	-0.491813	0.0146471
UBL5	blue	-0.491711	0.0146708
EDN3	blue	0.491694	0.0146746
KCTD7	blue	0.491657	0.0146832
DCUN1D1	blue	-0.491555	0.0147069
AP2A2	blue	0.491539	0.0147106
MAK16	blue	-0.491341	0.0147569
SIRT7	blue	0.491123	0.0148079
ADCY4	blue	0.490967	0.0148443
RPP40	blue	0.490253	0.0150127
RAB2A	blue	-0.490139	0.0150397
KLHDC7A	blue	-0.490111	0.0150463
SEPTIN11	blue	-0.489935	0.0150882
FBXO5	blue	-0.489737	0.0151354
DPY19L3	blue	-0.48967	0.0151512
PRKRIP1	blue	-0.489541	0.0151821
HEMGN	blue	-0.489447	0.0152044
YPEL3	blue	0.489378	0.015221
ZNF513	blue	0.489371	0.0152226
MXI1	blue	-0.489079	0.0152928
SUMO1	blue	-0.488928	0.0153291
SURF2	blue	0.488808	0.0153581
LOC129404903	blue	-0.488735	0.0153758
GPR84	blue	0.488717	0.01538
TACR1	blue	0.488621	0.0154034
ZBTB48	blue	0.488222	0.0155001
VWF	blue	0.488159	0.0155153
APOB	blue	-0.488007	0.0155523
PACS2	blue	0.487934	0.0155701
SPSB3	blue	0.487914	0.015575
TMEM229B	blue	0.487906	0.0155769
PPIP5K2	blue	-0.487771	0.0156098
GMEB1	blue	-0.487674	0.0156337
CDC16	blue	-0.487429	0.0156938
IGSF8	blue	0.487336	0.0157165
SUMO3	blue	0.487315	0.0157218
GLT1D1	blue	0.487232	0.0157421
DNAJC9	blue	-0.486868	0.0158319
TWF1	blue	-0.486685	0.0158772
LOC129403484	blue	-0.486304	0.0159719
ZC3HC1	blue	-0.48622	0.015993
UBE2J1	blue	-0.486149	0.0160106
PRDX2	blue	0.485943	0.0160621
LYAR	blue	-0.485838	0.0160883
ERP44	blue	-0.485493	0.016175
TAF1C	blue	0.48546	0.0161832
PSMA3	blue	-0.485457	0.016184
ETV5	blue	-0.485193	0.0162507
STAT3	blue	0.485072	0.0162812
THOC5	blue	-0.484931	0.016317
PCNX3	blue	0.484662	0.0163853
LOC101537599	blue	-0.484557	0.0164118
MRTO4	blue	-0.484084	0.0165327
DNAJC21	blue	-0.483963	0.0165637
TMBIM6	blue	-0.483899	0.0165802
TBCE	blue	-0.483374	0.0167154
C6H5orf15	blue	-0.483348	0.0167221
LOC129401129	blue	-0.483212	0.0167574
POLN	blue	0.483143	0.0167753
CHMP1B	blue	-0.482972	0.0168197
GTF2IRD1	blue	0.482755	0.0168761
PPP1R2	blue	-0.482729	0.0168829
TAF9B	blue	-0.482503	0.0169419
RP2	blue	-0.482475	0.0169493
CMTR2	blue	-0.482005	0.0170725
IMPACT	blue	-0.481827	0.0171193
LOC129402205	blue	-0.481813	0.0171229
CPEB3	blue	-0.480628	0.0174378
NDOR1	blue	0.480586	0.017449
MOCS3	blue	0.48058	0.0174505
PPHLN1	blue	-0.480462	0.0174822
ADRA1B	blue	0.479945	0.0176213
PAN2	blue	-0.479818	0.0176556
NBR1	blue	-0.47972	0.0176821
LOC101554265	blue	-0.479622	0.0177087
PABIR2	blue	0.479514	0.0177378
GRAMD1A	blue	0.479263	0.0178061
OSBPL5	blue	0.479044	0.0178659
SERF2	blue	0.478731	0.0179514
TTLL5	blue	-0.478407	0.0180404
PBXIP1	blue	0.478222	0.0180914
DGKQ	blue	0.4782	0.0180974
RIPOR1	blue	0.478099	0.0181253
ADAM10	blue	-0.477816	0.0182036
EMC1	blue	-0.477726	0.0182287
COPS4	blue	-0.477425	0.0183123
CCDC126	blue	-0.477371	0.0183273
MIPEP	blue	-0.477324	0.0183402
EPHX1	blue	-0.477247	0.0183617
EXOSC1	blue	-0.477189	0.0183779
KPNA6	blue	-0.47709	0.0184056
ARID3B	blue	0.47698	0.0184365
ADISSP	blue	0.476809	0.0184844
DDHD2	blue	-0.476515	0.0185671
TERT	blue	0.476204	0.0186546
TSNAX	blue	-0.476139	0.018673
RTN4	blue	-0.475659	0.0188094
NUDT6	blue	0.475577	0.0188327
SYCE1	blue	0.47544	0.0188718
CHML	blue	-0.475277	0.0189184
FAM91A1	blue	-0.475174	0.0189479
ATP6V1F	blue	0.474989	0.0190007
LOC101547268	blue	0.474973	0.0190054
LOC129404895	blue	0.47466	0.0190953
IFNAR2	blue	0.474375	0.0191776
RNF208	blue	0.474266	0.0192091
LIN7C	blue	-0.473964	0.0192967
CRLS1	blue	-0.473453	0.0194459
KIF26B	blue	0.473441	0.0194493
TXN	blue	-0.473418	0.0194559
CAP1	blue	-0.473231	0.0195106
NT5C3B	blue	0.47317	0.0195287
NUP93	blue	0.473082	0.0195544
NDFIP2	blue	-0.472023	0.0198674
MTTP	blue	-0.471763	0.0199451
LOC129404885	blue	-0.471742	0.0199512
LOC101552218	blue	-0.471347	0.0200695
LOC101550214	blue	0.471139	0.020132
PCNP	blue	-0.471058	0.0201564
LOC101550358	blue	-0.470866	0.0202142
ACBD3	blue	-0.470768	0.0202438
COPRS	blue	0.470343	0.0203724
LOC101538853	blue	-0.469905	0.0205058
TRPM6	blue	-0.469722	0.0205616
SELENOO	blue	0.469666	0.0205788
ERICH1	blue	-0.469643	0.020586
ACOT11	blue	-0.469563	0.0206103
ELOVL2	blue	-0.469545	0.0206158
NUP107	blue	-0.469509	0.0206268
MGME1	blue	-0.469162	0.0207335
POF1B	blue	-0.468268	0.0210104
SAT1	blue	-0.46819	0.0210346
METTL17	blue	-0.46819	0.0210346
RAB8B	blue	-0.468083	0.021068
PTPRK	blue	-0.467827	0.0211479
HPN	blue	0.467407	0.0212797
MORF4L2	blue	-0.467228	0.0213363
DDHD1	blue	-0.46699	0.0214112
PSMD6	blue	-0.466916	0.0214347
CDH4	blue	0.46687	0.0214494
CPD	blue	-0.466319	0.0216242
CEP15	blue	0.466304	0.021629
RENBP	blue	0.466243	0.0216486
SEC63	blue	-0.466176	0.0216699
EGLN1	blue	-0.465975	0.0217341
FRMD4B	blue	-0.465478	0.0218936
ODC1	blue	-0.46544	0.0219059
UCK1	blue	0.465257	0.021965
TMEM30A	blue	-0.464998	0.0220484
P2RY4	blue	-0.464852	0.0220959
C4BPB	blue	0.464771	0.0221222
KAT2B	blue	-0.464753	0.022128
SKIC8	blue	-0.464592	0.0221804
PDHA1	blue	-0.464582	0.0221835
LRP2	blue	-0.464421	0.0222361
PLOD2	blue	-0.464286	0.0222802
UMAD1	blue	-0.464218	0.0223024
MIDN	blue	0.464214	0.0223034
VWA8	blue	-0.464151	0.0223242
PLS3	blue	-0.464018	0.0223678
SP4	blue	-0.463712	0.0224682
ATP5F1C	blue	-0.463254	0.0226191
YME1L1	blue	-0.462873	0.0227453
LPAR2	blue	0.462759	0.0227832
IFT74	blue	-0.462728	0.0227933
PRMT2	blue	0.462658	0.0228165
TNFAIP8L1	blue	0.462404	0.0229014
LOC129404430	blue	-0.462307	0.0229337
CFAP97	blue	-0.462215	0.0229645
RARS1	blue	-0.462156	0.0229841
IDS	blue	-0.462053	0.0230186
TP53BP1	blue	0.461921	0.0230629
PARD6A	blue	0.461654	0.0231526
GMIP	blue	0.46155	0.0231877
ARFIP1	blue	-0.461488	0.0232088
BRI3	blue	0.461475	0.0232129
VBP1	blue	-0.461431	0.023228
SMARCB1	blue	0.461416	0.0232331
GMNN	blue	-0.460873	0.0234168
SRSF10	blue	-0.460837	0.0234292
SLC34A3	blue	0.460794	0.0234438
LOC129399440	blue	-0.460399	0.0235783
LOC129400339	blue	0.460174	0.0236554
LOC129400346	blue	0.460174	0.0236554
PJA1	blue	-0.459992	0.0237177
CREBZF	blue	-0.459983	0.0237209
HIP1	blue	0.459966	0.0237267
RALGAPA1	blue	-0.459825	0.0237751
MKS1	blue	0.459746	0.0238024
TSC2	blue	0.459723	0.0238102
DOCK6	blue	0.4595	0.0238871
ABL1	blue	0.45892	0.0240881
SMARCA4	blue	0.458823	0.024122
C1D	blue	-0.458728	0.0241549
MEN1	blue	0.458466	0.0242463
SLC11A2	blue	-0.458419	0.0242628
WASHC5	blue	-0.458042	0.0243952
LIN54	blue	-0.457919	0.0244382
PTS	blue	-0.457874	0.0244541
TEX2	blue	-0.457602	0.0245499
DPM2	blue	0.457542	0.024571
OPTN	blue	0.457352	0.0246385
FAM241A	blue	-0.457164	0.024705
CDIP1	blue	0.457049	0.0247458
ACSL4	blue	-0.456985	0.0247687
ABCC2	blue	-0.456731	0.0248588
LMNTD2	blue	0.456205	0.0250469
NKIRAS2	blue	0.456007	0.0251182
DNASE2B	blue	0.455963	0.0251342
ABHD3	blue	-0.455935	0.025144
SLMAP	blue	-0.455469	0.0253124
DLD	blue	-0.455268	0.0253851
RDH11	blue	-0.455214	0.0254048
SNX13	blue	-0.455077	0.0254546
SLC1A1	blue	-0.454891	0.0255221
SEC23A	blue	-0.454775	0.0255643
SORBS2	blue	-0.45476	0.02557
CAB39L	blue	-0.454657	0.0256073
GCAT	blue	0.454382	0.0257082
RIN1	blue	0.454316	0.025732
ADIPOR2	blue	-0.454299	0.0257383
RABL3	blue	-0.453006	0.0262161
LOC101550549	blue	-0.452981	0.0262256
SAPCD2	blue	0.452967	0.0262305
DIPK2A	blue	-0.45286	0.0262704
PALS2	blue	-0.452827	0.0262827
ALG12	blue	0.452405	0.0264406
ASB3	blue	-0.451934	0.0266173
PAK4	blue	0.451628	0.0267331
BAD	blue	0.451364	0.0268331
GPRC5C	blue	0.451053	0.0269512
PRUNE1	blue	-0.450257	0.0272554
TP53RK	blue	0.450145	0.0272983
LYPD1	blue	0.45013	0.0273042
SMG8	blue	-0.450127	0.0273052
CLEC1B	blue	-0.450122	0.0273071
GYPA	blue	-0.449422	0.0275775
FBXO3	blue	-0.449414	0.0275805
YIPF4	blue	-0.4493	0.0276247
SKP1	blue	-0.449072	0.0277133
RELT	blue	0.448985	0.0277473
EXOSC9	blue	-0.448858	0.0277967
AASDHPPT	blue	-0.448828	0.0278082
ELOVL5	blue	-0.448798	0.0278199
MTMR4	blue	-0.448647	0.0278792
KIDINS220	blue	-0.448481	0.0279441
TRIM13	blue	-0.448328	0.0280041
TMEM126A	blue	-0.448091	0.028097
CAMK1	blue	0.448058	0.0281103
CLCN3	blue	-0.44801	0.028129
MTIF2	blue	-0.447837	0.0281973
LACTB2	blue	-0.447748	0.0282324
MTPAP	blue	-0.447733	0.0282384
JADE1	blue	0.447625	0.0282809
RNF167	blue	-0.447609	0.0282871
KIF26A	blue	0.447543	0.0283133
CDC27	blue	-0.447212	0.0284444
PPP2R2D	blue	0.447111	0.0284846
PTPN3	blue	0.446854	0.028587
TSPAN4	blue	0.446768	0.0286217
SAMD15	blue	-0.446233	0.0288356
CNBP	blue	-0.446048	0.0289101
PPP2R5E	blue	-0.446001	0.028929
KLHL36	blue	0.445967	0.0289427
CCDC24	blue	0.445551	0.0291105
SNAI1	blue	0.445436	0.0291574
MIS18A	blue	-0.445423	0.0291628
LOC101553558	blue	-0.444746	0.029438
PDCL	blue	-0.444307	0.0296177
DPP3	blue	0.444266	0.0296347
PEX13	blue	-0.444062	0.0297185
RANBP6	blue	-0.444023	0.0297345
THRAP3	blue	-0.443717	0.0298607
ACTR2	blue	-0.443532	0.0299372
GPS2	blue	-0.4435	0.0299505
TCEA2	blue	0.443114	0.0301107
HSPA5	blue	-0.443043	0.0301401
XDH	blue	-0.442954	0.0301772
ESF1	blue	-0.442424	0.0303985
LOC101543750	blue	-0.442301	0.0304499
EXT2	blue	0.442294	0.030453
LOC101550312	blue	0.442189	0.0304969
NUP35	blue	-0.441773	0.0306724
AADAC	blue	-0.441577	0.0307551
G3BP2	blue	-0.441407	0.0308268
RTEL1	blue	0.441182	0.0309222
ARRB1	blue	0.440815	0.0310788
TRIM3	blue	0.440791	0.0310888
CX3CR1	blue	-0.440716	0.0311208
FGFR1	blue	0.440428	0.0312442
SHCBP1	blue	-0.440106	0.031382
LOC129405385	blue	0.439869	0.0314842
NPDC1	blue	0.439802	0.0315129
SLC5A8	blue	-0.439756	0.0315328
SULT1C4	blue	-0.439604	0.0315984
AHSP	blue	-0.439494	0.0316459
UGDH	blue	-0.439482	0.0316511
MAP3K11	blue	0.439161	0.0317905
SIAH2	blue	0.439069	0.0318304
OGG1	blue	0.438941	0.0318858
STXBP6	blue	-0.438852	0.0319248
CPS1	blue	-0.438679	0.0320001
RUSF1	blue	-0.438553	0.0320554
COQ6	blue	-0.43845	0.0321002
RAD23B	blue	-0.438359	0.03214
ANGPTL6	blue	0.438229	0.032197
CLNS1A	blue	-0.438134	0.0322388
OSBPL11	blue	-0.438059	0.0322715
POGLUT1	blue	-0.437948	0.0323207
CEP95	blue	-0.437785	0.0323925
RAB18	blue	-0.437485	0.0325248
EHHADH	blue	-0.437412	0.0325571
RHEB	blue	-0.437327	0.0325946
HACD1	blue	0.43677	0.0328422
ZNF783	blue	0.436634	0.0329028
TAPT1	blue	-0.436541	0.0329443
SLC10A7	blue	-0.436508	0.0329591
TMX4	blue	-0.436471	0.0329757
UCP2	blue	-0.43642	0.0329984
VMA21	blue	-0.436259	0.0330703
EFNB2	blue	0.435723	0.0333114
KIF2C	blue	-0.435469	0.0334258
XRCC1	blue	0.435439	0.0334393
ALG11	blue	-0.434929	0.0336707
FANCG	blue	0.434384	0.0339193
TTLL12	blue	0.434089	0.0340542
PPP1R17	blue	-0.433793	0.0341902
EFCAB12	blue	0.433677	0.0342438
GXYLT1	blue	-0.433639	0.034261
RPIA	blue	-0.433556	0.0342992
CHEK2	blue	0.433474	0.0343371
RAP1GAP	blue	0.433119	0.0345014
LOC101541249	blue	-0.433072	0.0345233
IDO2	blue	-0.432827	0.0346368
CSTF2T	blue	-0.432671	0.0347096
LOC101540181	blue	-0.431805	0.0351144
UGGT1	blue	-0.431369	0.0353201
ARL14EP	blue	-0.431331	0.0353381
LOC129406508	blue	0.431175	0.0354118
LOC129405141	blue	-0.431146	0.0354254
MRPS18A	blue	0.431044	0.0354737
PSMD14	blue	-0.430215	0.0358682
SSBP2	blue	-0.430133	0.0359074
SRRM1	blue	-0.430043	0.0359506
MBTPS2	blue	-0.429964	0.0359882
PDZD11	blue	-0.429815	0.0360597
NAA40	blue	0.429577	0.0361741
NDUFA12	blue	-0.429491	0.0362152
WRN	blue	-0.429286	0.0363142
FOSL1	blue	0.429032	0.036437
PPME1	blue	-0.428767	0.0365656
ULK2	blue	-0.428223	0.03683
[truncated: 17,462 more rows]
